# Supplementary material
Source: PubMed Central journal article supplement (PMC3967509)
Supplement: NIHMS559217-supplement-Supplemental_Material.pdf [file NIHMS559217-supplement-Supplemental_Material.pdf]

## **Supplemental Material**

### **1. Supplemental Methods**

All studies were conducted in concordance with the protocols approved by the Washington University and Columbia University institutional review boards.

#### **1.1 Human Left Ventricular Tissue Acquisition and RNA Extraction**

Paired LV samples from patients with severe heart failure of ischemic (ICM, n=8) and non-ischemic (NICM, n=8) origin were collected at the time of LVAD implantation (pre-LVAD) and during cardiac transplant (post-LVAD). Clinical parameters and the medical histories of each subject are summarized in Supplemental Table S1. Hemodynamic and echocardiographic parameters of each subject were collected before (first measurement after LVAD implant) and after (last measurement before LVAD removal) LVAD support. Non-failing (NF) human LV samples (n=8) were obtained from Mid-America Transplant Services, where non-failing donor hearts not suitable for transplant due to technical or non-cardiac reasons were collected. For each sample, transmural LV tissue was collected from LV apex, treated with *RNAlater* (Qiagen, CA) RNA stabilization reagent and stored at  $-80^{\circ}\text{C}$  until extraction of the RNA. Total RNA was isolated from individual LV samples with Trizol (Life technologies, NY) using described methods.<sup>1,2</sup> Agilent RNA 6000 Nano Kit and Agilent 2100 bioanalyzer (Agilent Technologies, CA) were utilized to assess the quality and integrity of the total RNA samples. Only RNA samples with a clear peak between 25-200 nt on electropherogram (small RNA fraction) and an RNA integrity number (RIN) of at least 8 were used for subsequent library construction and sequencing.

#### **1.2 RNA Library Preparation and Sequencing**

RNA libraries were prepared using TrueSeq RNA Sample Prep Kits (Illumina, CA) in accordance with the manufacturer's recommendations. In brief, 3µg of total LV RNA was twice oligo(dT) selected using poly-T oligo-attached magnetic beads. The poly-A(+) RNA was then eluted, fragmented and reverse transcribed into first strand cDNA using random hexamers, followed by second-strand cDNA synthesis. Double-stranded cDNAs were end-repaired and singly adenylated at the 3' ends. Barcoded adapters containing unique six-base index sequences and T-overhangs were ligated to the cDNA samples prepared from each of the individual LV samples. Individual cDNA libraries were PCR amplified and purified; To minimize lane and batch effects in RNASeq experiments, barcoded libraries prepared from NF, paired ICM and NICM samples were mixed and pooled in equimolar (10 nmol/L) amounts and diluted to 4 pmol/L for cluster formation on a single flow cell lane, followed by pair-end sequencing on an Illumina HiSeq 2000 sequencer.

### **1.3 RNA Sequencing Data Analysis**

After separating the multiplexed sequencing data, adapter sequences were removed and the individual libraries were converted to the FASTQ format. A total of 572 million read pairs were obtained from the sequencing of the 40 RNA libraries (Table 1). Sequence reads were aligned to the human genome (hg19) with TopHat (<http://tophat.cbcb.umd.edu/>),<sup>3</sup> and the resulting alignment files were compiled and reconstructed using Cufflinks (<http://cufflinks.cbcb.umd.edu/>)<sup>4</sup> for novel transcript identification. Transcripts identified as non-homologous to any known coding or non-coding transcripts were identified and filtered to include only sequences that: (1) are multiexonic; (2) have low protein coding potential (calculated using Coding Potential Assessment Tool v1.2.1 <http://lilab.research.bcm.edu/cpat/>); and, (3) are expressed at  $\geq 0.5$  RPKM (Reads Per Kilobase of exon per Million mapped reads) in more than

one sample to exclude transcripts with low abundance and therefore unreliable for inclusion in analysis of differential gene expression.<sup>5,6</sup> Transcripts fulfilling all of these criteria were considered novel human ventricular lncRNAs. Using these criteria, a total of 113 novel human cardiac lncRNAs were identified (see Results and Figure 1).

Sequence reads aligned to the human genome also underwent clustering, counting and annotation with Cufflinks.<sup>4</sup> For mRNA analyses, the RefSeq and Ensembl transcript (after removal of all non-coding RNAs) databases were chosen as the annotation references. For lncRNA analyses, we generated an annotation database that includes (intragenic and intergenic) lncRNAs from the NONCODE 3.0 human non-coding RNA database (<http://www.noncode.org>),<sup>7</sup> the Human Body Map lincRNAs catalog ([http://www.broadinstitute.org/genome\\_bio/human\\_lincrnas/](http://www.broadinstitute.org/genome_bio/human_lincrnas/)),<sup>6</sup> as well as the 113 novel lncRNAs identified in the human LV samples analyzed here. The read counts of each transcript were normalized to the length of the individual transcript and to the total mapped read counts in each sample and expressed as RPKM. Sequence reads mapped to different isoforms of individual genes were pooled together for subsequent comparative analyses.

#### **1.4 Small RNA Library Construction and Sequencing**

Small RNA libraries were prepared using TrueSeq Small RNA Sample Prep Kits (Illumina) in accordance with the manufacturer's instructions. Briefly, 3' and 5' adapters were sequentially ligated to small RNAs (from 1 µg total RNA), followed by a reverse transcription reaction to create single stranded cDNA. The cDNA samples were then PCR amplified and barcoded using a common primer and a primer containing unique six-base index sequence. The amplified libraries derived from small RNA molecules of approximately 22-30 bases were size-

selected/gel-purified and quantified using Qubit dsDNA HS Assay kit (Life Technologies, CA). Barcoded libraries prepared from NF, paired ICM and NICM samples were mixed were pooled in equimolar (10 nmol/L) amounts and diluted to 8 pmol/L for cluster formation on a single flow cell lane, followed by single-end sequencing on an Illumina HiSeq 2000 sequencer.

### **1.5 Small RNA Sequencing Data Analyses**

Sequencing data from samples pooled in the same flow cell lane were separated (demultiplexed) using CASAVA 1.6 software (Illumina). A total of 507 million reads were obtained from sequencing 40 small RNA libraries (Table 1). The sequence reads were analyzed using the miRanalyzer program,<sup>8,9</sup> where the raw sequencing data were transformed and filtered to keep only sequences from 17-26 bases. Using Bowtie,<sup>10</sup> filtered reads were then successively mapped to: (1) miRBase<sup>11</sup> v.18 mouse database (allowing up to two mismatches) to detect known miRNAs; (2) RefSeq and Rfam database to detect contamination from other RNA species. The sequences matching known miRNAs were clustered and counted. The read counts of each known miRNAs were then normalized to the total counts of sequences mapped to miRbase v.18 database and are presented as PMMR (sequences per million mapped reads).

### **1.6 Sequencing Data Analyses and Statistical Methods**

Cuffdiff 2.0 (mRNA and lncRNA) and miRanalyzer (miRNA) were utilized for differential expression analyses between NF and ICM/NICM samples, where normalized read counts, fold change, and *P* values (corrected for multiple testing) of each transcript were reported (see Results). The statistical significance of differences between paired HF samples before and after LVAD support was evaluated by paired sample Wilcoxon signed rank test, where a two-tailed *P* value <0.05 was considered statistically significant. Gene symbols and PMMR/RPKM

values were imported into MultiExperiment Viewer (MeV v4.7.4) for preparation of heat-map and hierarchical clustering analyses. Partek Genomics Suite version 6.5 (Partek, St Louis, MO) was used for principal component analyses. Correlation coefficients for comparisons of miRNA/mRNA expression between biological replicates were calculated using Excel (Microsoft).

### **1.7 Quantitative Reverse-Transcription PCR**

Total RNA isolated from individual LV samples was reverse transcribed into cDNA using NCode VILO cDNA synthesis Kit (Life Technologies). Transcript quantification for miRNAs was carried out using EXPRESS SYBR GreenER miRNA qRT-PCR Kit (Life Technologies) with NCode universal reverse primer and forward primers designed specifically for each of the miRNAs. All data, analyzed using the threshold cycle relative quantification ( $\Delta\Delta C_T$ ) method, were normalized to the value measured for 5S rRNA. Transcript analyses of atrial natriuretic factor (*ANF*), glyceraldehyde 3-phosphate dehydrogenase (*GAPDH*) and selected lncRNAs were carried out by regular SYBR Green qRT-PCR, using described methods.<sup>1,2</sup>

### **1.8 Microarray analyses**

Microarray data of an independent cohort of human cardiac (11 NF, 11 ICM and 15 NICM) samples were obtained from Harvard Medical School CardioGenomics Programs for Genomic Applications (Affymetrix HG-U133\_Plus\_2 arrays, GEO accession number: GSE1145).<sup>12</sup> Re-annotation R packages with lncRNA Chip Definition Files (CDFs) were downloaded from GATEExplorer website (<http://bioinfow.dep.usal.es/xgate/principal.php>).<sup>13</sup> Unfiltered raw data were imported in R with Robust Multichip Average (RMA)<sup>14</sup> background

correction and quantile normalization. The mean expression levels of individual lncRNA in NF, ICM and NICM samples were compared. One-way ANOVA with a false discovery rate (FDR) of 0.05 was utilized to identify differentially expressed lncRNA in these samples. A *P*-value (corrected for multiple comparison) <0.001 was considered statistically significant. Hierarchical clustering of the overall expression profiles of lncRNAs and mRNAs was performed by Pearson's correlation with average linkage clustering using MeV v4.7.4.

## **2. Supplemental Figure Legends**

**Supplemental Figure 1. Scatter plot of normalized read counts between technical replicates confirms the reproducibility of RNASeq experiments.** Scatter plot of the normalized read counts of detectable poly-A(+) RNAs shows high degree of correlation ( $\beta=1.00$ ,  $R^2>0.99$ ) between technical replicates of non-failing LV samples, documenting the reproducibility of the RNASeq experiments.

**Supplemental Figure 2. Scatter plot of normalized read counts between technical replicates reveals the reproducibility of miRNASeq experiments.** Scatter plot of the normalized read counts of all known miRNA showed high degree of correlation ( $\beta=1.06$ ,  $R^2>0.99$ ) between technical replicates of non-failing LV samples, consistent with high reproducibility of the miRNASeq experiments.

**Supplemental Figure 3. Results of qPCR analyses of selected transcripts are highly correlated with RNASeq data.** Scatter plot of transcript expression levels quantified with deep sequencing (Y-axis) versus qPCR (X-axis) across all 40 human LV samples reveals that the results obtained with the two methods are highly correlated.

**Supplemental Figure 4. Inclusion of low abundance (RPKM 1-3) transcripts does not improve the power of mRNA to discriminate cardiomyopathic samples.** The expression heat map and sample clustering dendrogram illustrated were generated including all mRNAs expressed at  $\geq 1$  RPKM and differentially expressed (ANOVA  $P < 0.05$ ) among NF, ICM and NICM samples. Comparison with the mRNA dendrogram in Figure 3A (using only mRNAs expressed at  $\geq 3$  RPKM) reveals that adding lower abundance mRNAs (1-3 RPKM) to the clustering procedure did not improve the power of mRNAs to discriminate ICM from NICM samples.

**Supplemental Figure 5. Expression profiles of a subset of previously reported mRNA and miRNA failed to discriminate between ICM and NICM samples.**

Heat map and sample clustering dendrograms generated using 90 mRNAs reported by Kitleson et al<sup>15</sup> (A) or the 29 miRNAs reported by Ikeda et al<sup>16</sup> (B) did not provide distinction between ICM and NICM samples.

**Supplemental Figure 6. Selection of classifier genes improves the power of mRNA dendrograms to distinguish cardiomyopathic samples**

Expression heat map and clustering dendrogram using only the 100 most differentially-expressed mRNAs identified by RNASeq revealed that the discriminatory power of mRNA profiles improved and, in addition, that the ICM/NICM samples can be better separated, with only 2 ICM and 2 NICM samples misclassified.

**Supplemental Figure 7. Clustering dendrogram of the lncRNA and mRNA expression profiles from Cardiogenomic microarray data demonstrated that lncRNAs, but not mRNAs, provide adequate power to discriminate cardiomyopathic samples by etiology**

Unsupervised hierarchical clustering of the overall lncRNA (A) and mRNA (B) expression profiles derived from the microarray data of the CardioGenomics Project (11 NF, 11 ICM and 15 NICM)<sup>12</sup> showed that the overall expression profiles of lncRNAs correctly classified all but one NICM samples. The overall expression profiles of mRNAs, however, failed to discriminate ICM from NICM samples.

**Supplemental Figure 8. mRNA and miRNA expression signatures do not discriminate LV samples before and after LVAD support.** Principal component analyses of mRNA (A, B) and miRNA (C, D) expression profiles in NF samples and in NICM and ICM samples before and after LVAD support reveals that neither the mRNA nor the miRNA expression profile distinguishes LV samples from ICM or NICM failing hearts before and after LVAD support. The variance explained by the principal components chosen is shown on top of each plot.

**Supplemental Figure 9. Adding lncRNAs to combined mRNA and miRNA expression profiles increases the power to discriminate ICM samples before and after LVAD support.** Expression heat map and unsupervised hierarchical clustering using combined mRNA (n=50) and miRNA (n=28) expression profiles reported by Matkovich et al<sup>17</sup> (A) failed to distinguish pre-LVAD from post-LVAD, ICM samples. Adding the 50 most differentially expressed lncRNAs into the mRNA/miRNA mix (B) greatly improves the discriminatory power and correctly classified pre- and post-LVAD ICM samples, with only one sample misclassified.

**Supplemental Figure 10. Adding lncRNAs to combined mRNA and miRNA expression profiles increases the power to discriminate NICM samples before and after LVAD support.** Expression heat map and unsupervised hierarchical clustering using combined mRNA and miRNA expression profiles<sup>17</sup> (A) failed to distinguish between pre- and post-LVAD, NICM



samples. Adding the 50 most differentially expressed lncRNAs into the mRNA/miRNA mix (B) greatly improves the discriminatory power and the classification of pre- and post-LVAD NICM samples, with only one post-LVAD NICM sample classified incorrectly.

**Supplemental Figure 11. Expression of cardiac mitochondrial lncRNAs is negatively associated with nuclear-encoded mitochondrial regulatory proteins.** (A) Dot plot of mitochondrial lncRNA (mito-lncRNA) abundance (relative to the mean value of NF) across all 5 groups of LV samples. There was a trend toward decreasing mito-lncRNA abundance in the HF samples, but this did not reach statistical significance. LVAD support, however, significantly ( $P=0.007$ ) decreased mito-lncRNA expression in NICM, but not in ICM, LV. (B) Scatter plot of mito-lncRNA abundance (Y-axis) versus the abundance of nuclear-encoded proteins known to regulate mito-lncRNA expression or mitochondrial transcription (X-axis) across all 40 human LV samples reveals that the expression levels of PPRC1 ( $r=-0.59$ ), GABPA ( $r=-0.63$ ) and NRF1 ( $r=-0.63$ ) are negatively associated with cardiac mito-lncRNA expression levels.

**Supplemental Figure 12. Additional analyses excluding one potential hypertrophic cardiomyopathy (HCM) sample did not reveal significant differences from the primary results**

Additional unsupervised hierarchical clustering and principal component analyses of the expression profiles of human cardiac mRNA (A), miRNA (B) and lncRNA (C), excluding the single potential HCM sample (NICM1) from the NICM group, revealed that lncRNA expression profiles can provide better discrimination between ICM and NICM samples than mRNAs or miRNAs, a result similar to the findings in the primary analyses presented in Figure 3A-C. The variance explained by the principal components chosen is shown on top of each plot. (D)

Unsupervised hierarchical clustering and heat map of lncRNA expression profiles in NF and in NICM samples (excluding NICM1) before and after LVAD support. The results are similar to that of the primary analyses shown in Figure 5A: lncRNA expression profiles can readily distinguish NICM samples before and after LVAD support. (E) The number of miRNAs, mRNAs and lncRNAs that were differentially expressed in NICM, excluding the potential HCM sample, and the percentage of each RNA species improved, normalized or overcorrected by LVAD support, are shown. These results are similar to those obtained in the original analysis shown in Figure 4E and supplemental table S9: a significantly higher proportion of lncRNAs that were abnormally expressed in NICM samples can be improved or normalized with LVAD support, compared to mRNAs and/or miRNAs.

## References

1. Marionneau C, Brunet S, Flagg TP, Pilgram TK, Demolombe S, Nerbonne JM. Distinct cellular and molecular mechanisms underlie functional remodeling of repolarizing K<sup>+</sup> currents with left ventricular hypertrophy. *Circ Res*. 2008;102:1406-1415.
2. Yang KC, Foeger NC, Marionneau C, Jay PY, McMullen JR, Nerbonne JM. Homeostatic regulation of electrical excitability in physiological cardiac hypertrophy. *J Physiol*. 2010;588:5015-5032.
3. Trapnell C, Pachter L, Salzberg SL. TopHat: discovering splice junctions with RNA-Seq. *Bioinformatics*. 2009;25:1105-1111.
4. Trapnell C, Williams BA, Pertea G, Mortazavi A, Kwan G, van Baren MJ, Salzberg SL, Wold BJ, Pachter L. Transcript assembly and quantification by RNA-Seq reveals unannotated transcripts and isoform switching during cell differentiation. *Nat Biotechnol*. 2010;28:511-515.
5. Lee JH, Gao C, Peng G, Greer C, Ren S, Wang Y, Xiao X. Analysis of transcriptome complexity through RNA sequencing in normal and failing murine hearts. *Circ Res*. 2011;9:1332-1341.
6. Cabili MN, Trapnell C, Goff L, Koziol M, Tazon-Vega B, Regev A, Rinn JL. Integrative annotation of human large intergenic noncoding RNAs reveals global properties and specific subclasses. *Genes Dev*. 2011;25:1915-1927.
7. Bu D, Yu K, Sun S, Xie C, Skogerbo G, Miao R, Xiao H, Liao Q, Luo H, Zhao G, Zhao H, Liu Z, Liu C, Chen R, Zhao Y. NONCODE v3.0: integrative annotation of long noncoding RNAs. *Nucleic Acids Res*. 2012;40:D210-215.
8. Hackenberg M, Sturm M, Langenberger D, Falcon-Perez JM, Aransay AM. miRanalyzer: a microRNA detection and analysis tool for next-generation sequencing experiments. *Nucleic Acids Res*. 2009;37:W68-76.
9. Hackenberg M, Rodriguez-Ezpeleta N, Aransay AM. miRanalyzer: an update on the detection and analysis of microRNAs in high-throughput sequencing experiments. *Nucleic Acids Res*. 2011;39:W132-138.
10. Langmead B, Trapnell C, Pop M, Salzberg SL. Ultrafast and memory-efficient alignment of short DNA sequences to the human genome. *Genome Biol*. 2009;10:R25.
11. Griffiths-Jones S. miRBase: the microRNA sequence database. *Methods Mol Biol*. 2006;342:129-138.
12. Genomics of Cardiovascular Development, Adaptation, and Remodeling. NHLBI Program for Genomic Applications, Harvard Medical School. URL: <http://www.cardiogenomics.org> [Mar, 2013 accessed].
13. Risueno A, Fontanillo C, Dinger ME, De Las Rivas J. GATEExplorer: genomic and transcriptomic explorer; mapping expression probes to gene loci, transcripts, exons and ncRNAs. *BMC Bioinformatics*. 2010;11:221.
14. Irizarry RA, Bolstad BM, Collin F, Cope LM, Hobbs B, Speed TP. Summaries of Affymetrix GeneChip probe level data. *Nucleic Acids Res*. 2003;31:e15.
15. Kittleson MM, Ye SQ, Irizarry RA, Minhas KM, Edness G, Conte JV, Parmigiani G, Miller LW, Chen Y, Hall JL, Garcia JG, Hare JM. Identification of a gene expression profile that differentiates between ischemic and nonischemic cardiomyopathy. *Circulation*. 2004;110:3444-3451.
16. Ikeda S, Kong SW, Lu J, Bisping E, Zhang H, Allen PD, Golub TR, Pieske B, Pu WT. Altered microRNA expression in human heart disease. *Physiol Genomics*. 2007;31:367-373.
17. Matkovich SJ, Van Booven DJ, Youker KA, Torre-Amione G, Diwan A, Eschenbacher WH, Dorn LE, Watson MA, Margulies KB, Dorn GW, 2nd. Reciprocal regulation of myocardial microRNAs and messenger RNA in human cardiomyopathy and reversal of the microRNA signature by biomechanical support. *Circulation*. 2009;119:1263-1271.

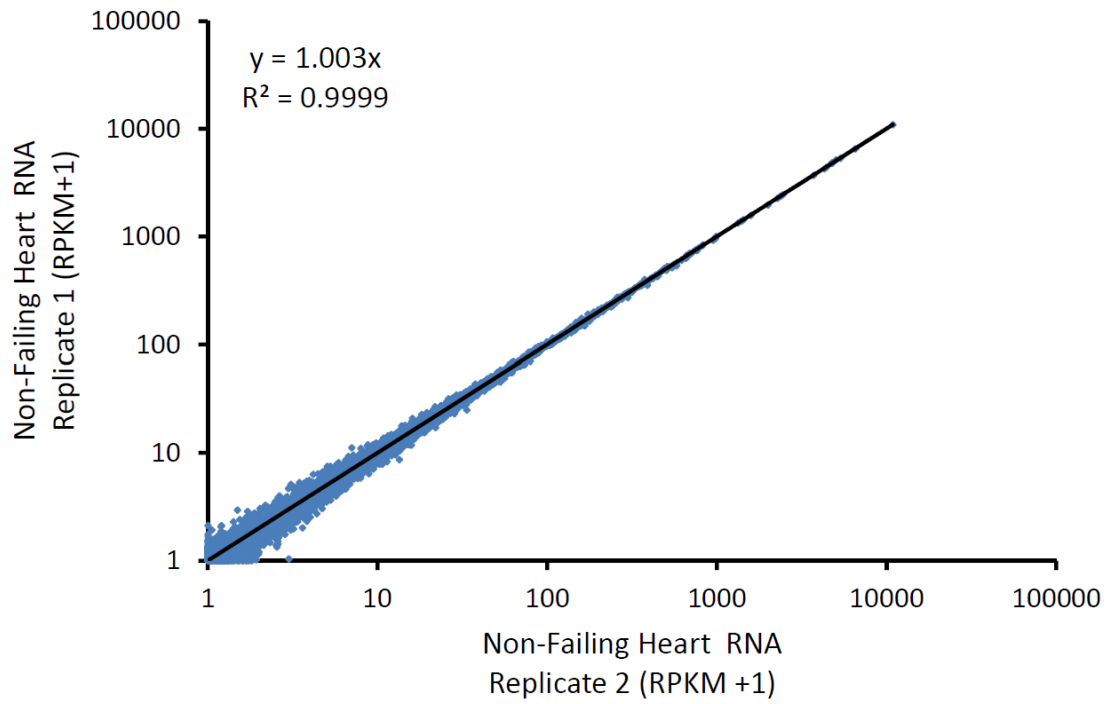

Supplemental Figure. 1 Scatter plot of normalized read counts between technical replicates reveals the reproducibility of RNASeq experiments

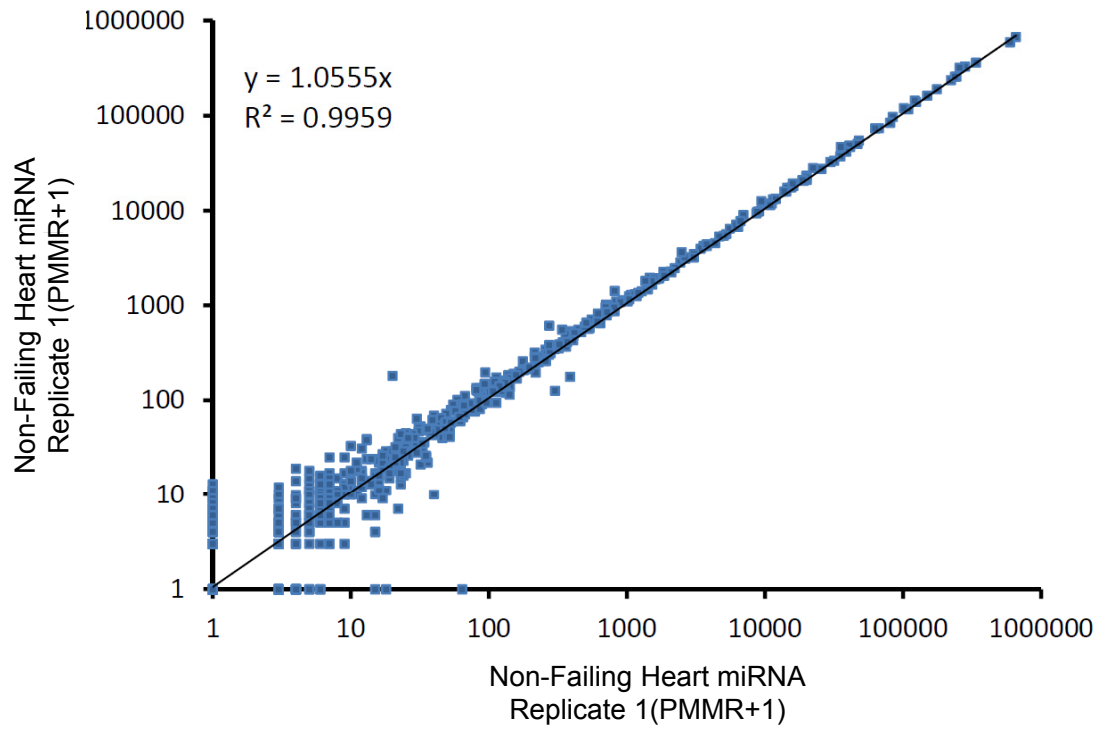

Supplemental Figure. 2 Scatter plot of normalized read counts between technical replicates reveals the reproducibility of miRNASeq experiments

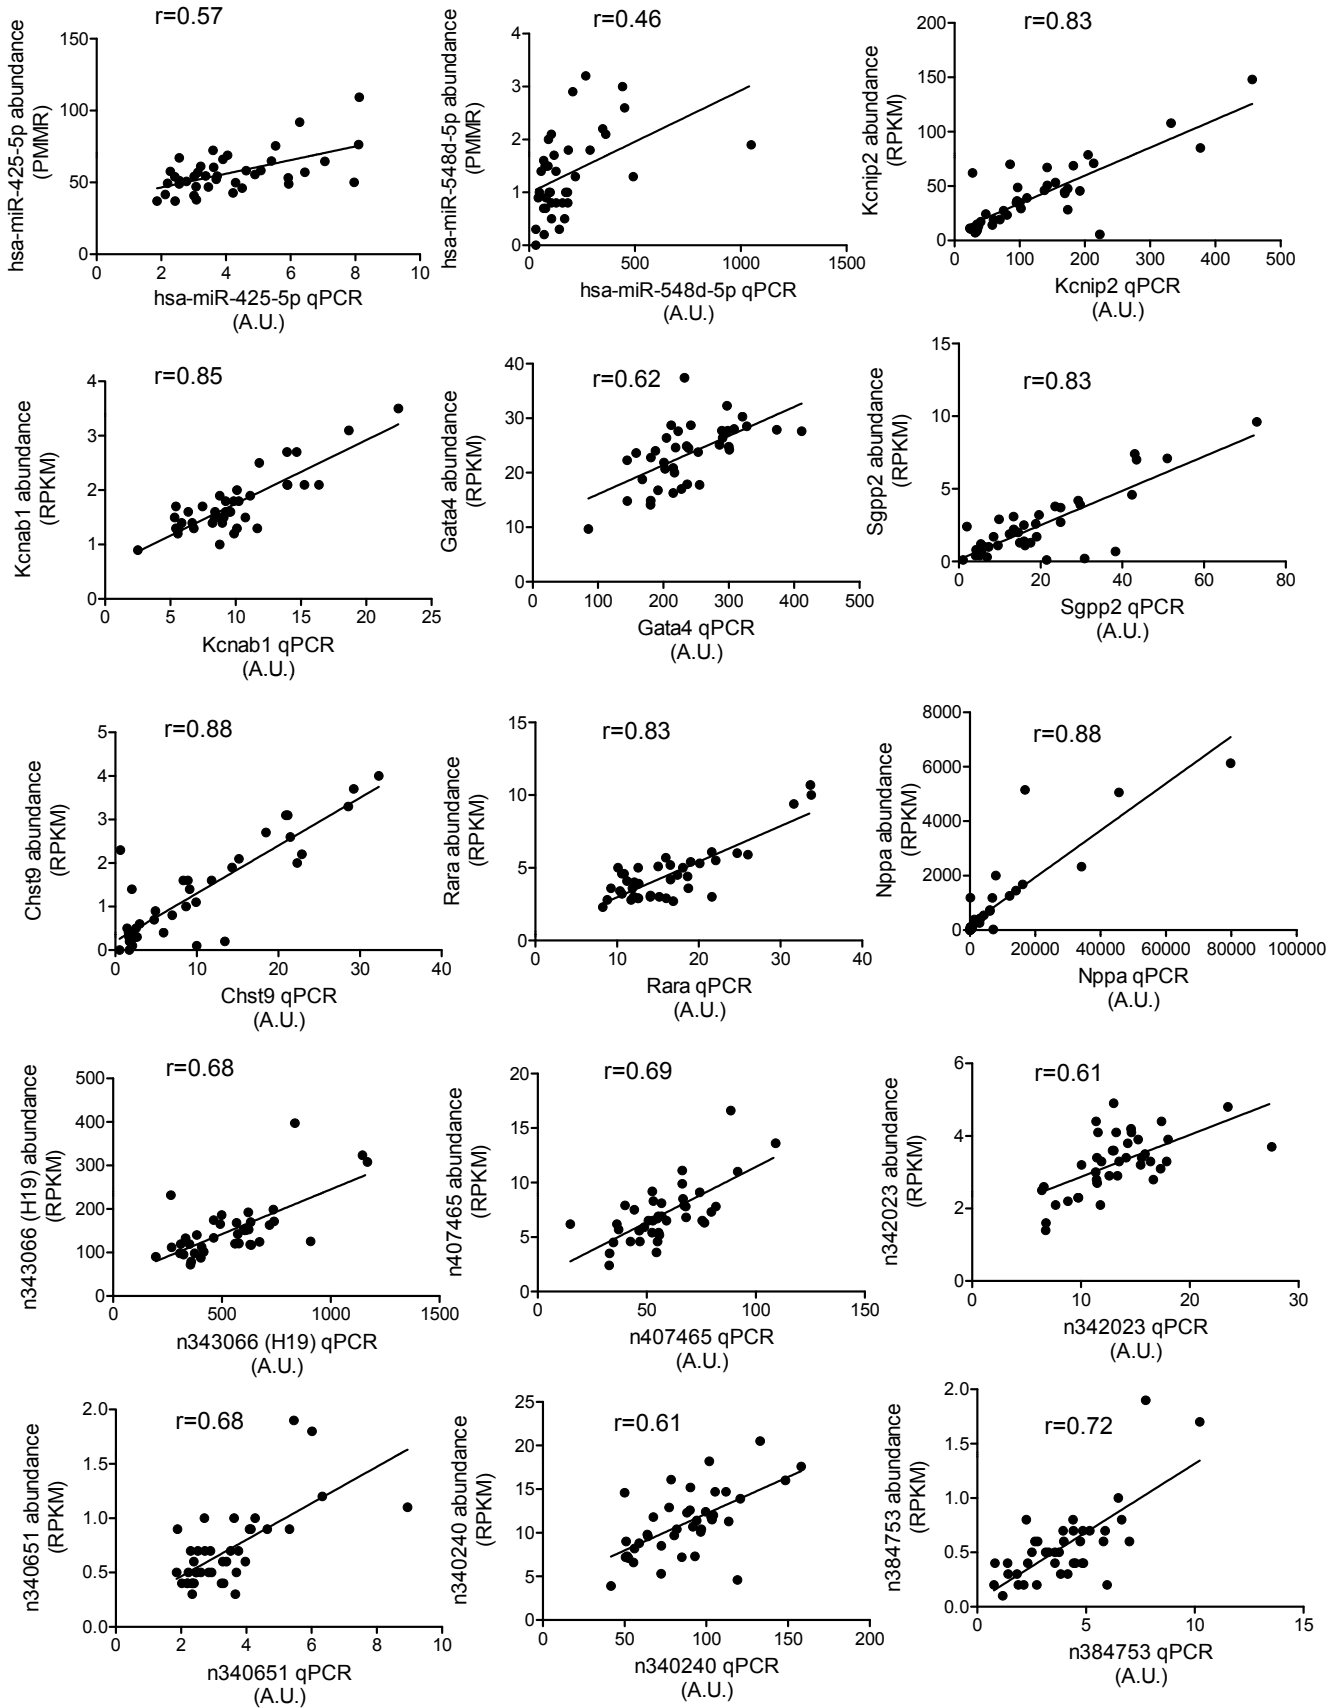

Supplemental Figure 3. qPCR Transcript Quantification Results Are Highly Correlated with RNASeq Data

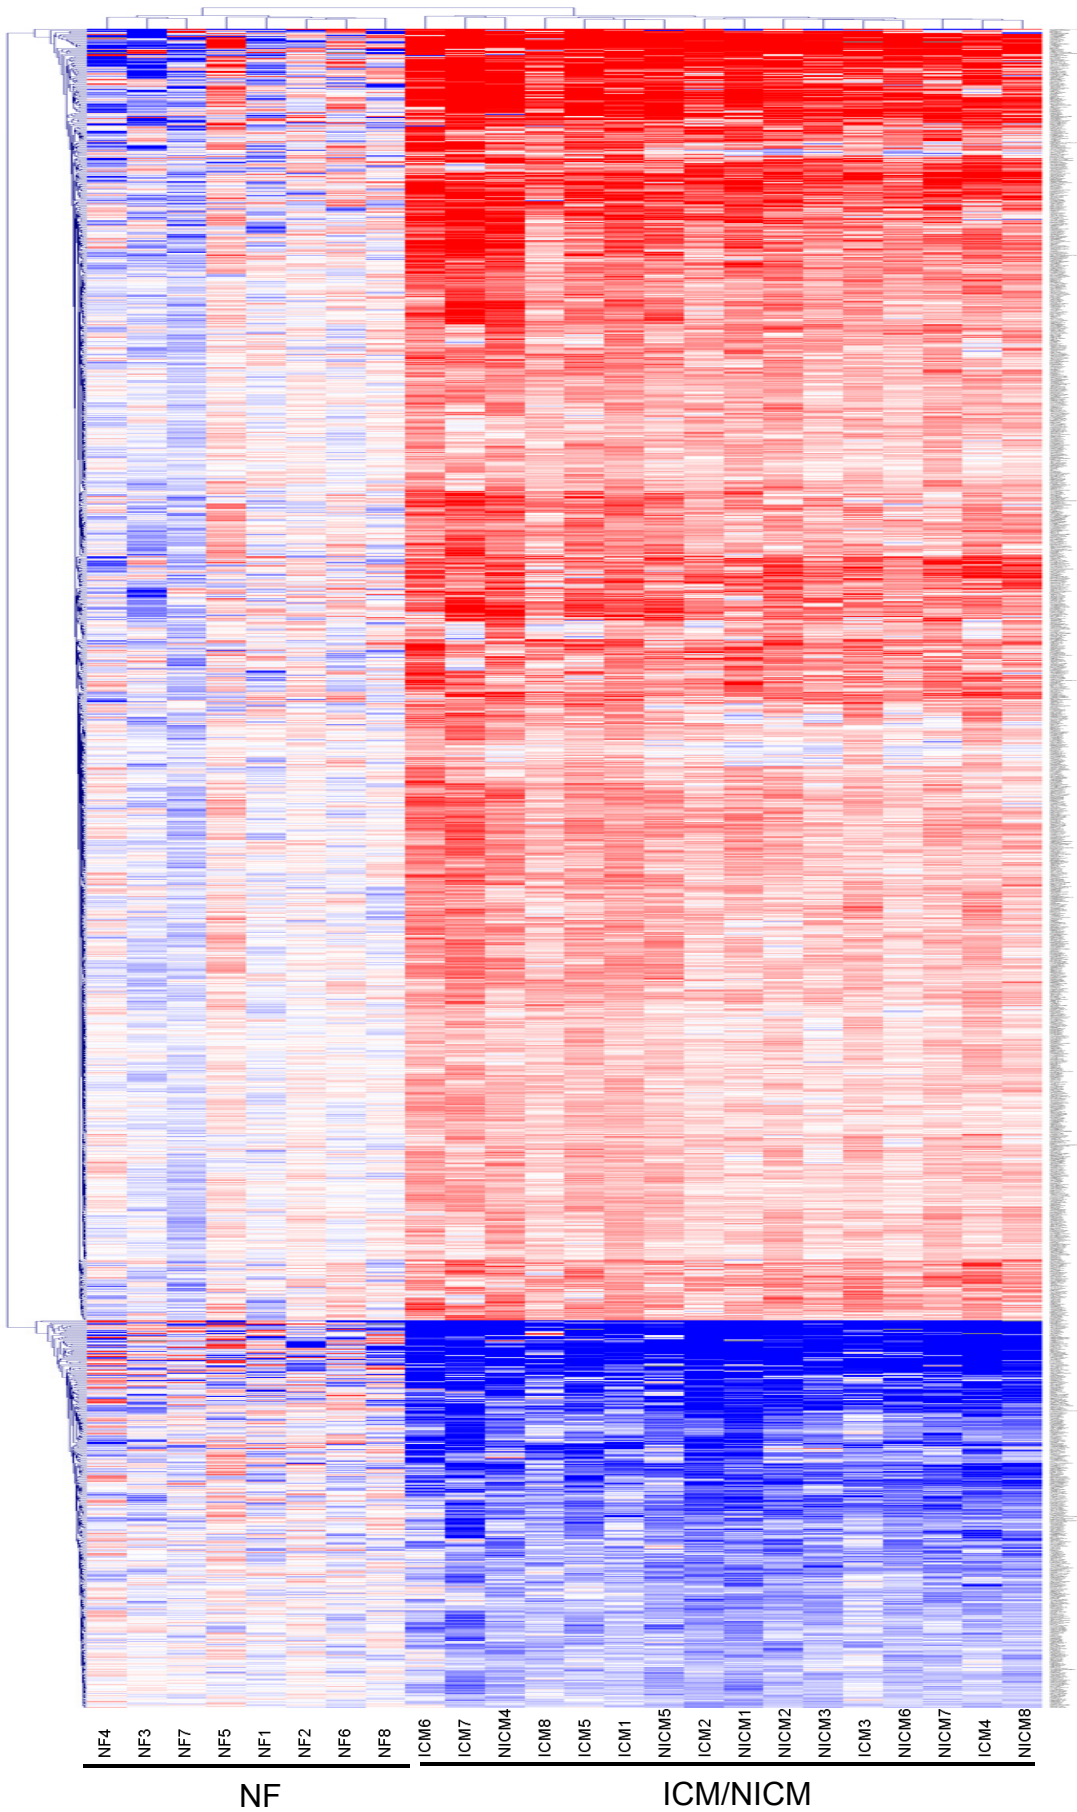

Supplemental Figure 4. Including lower abundance (RPKM 1-3) transcripts in mRNA dendrogram did not improve the power to discriminate cardiomyopathic samples

A

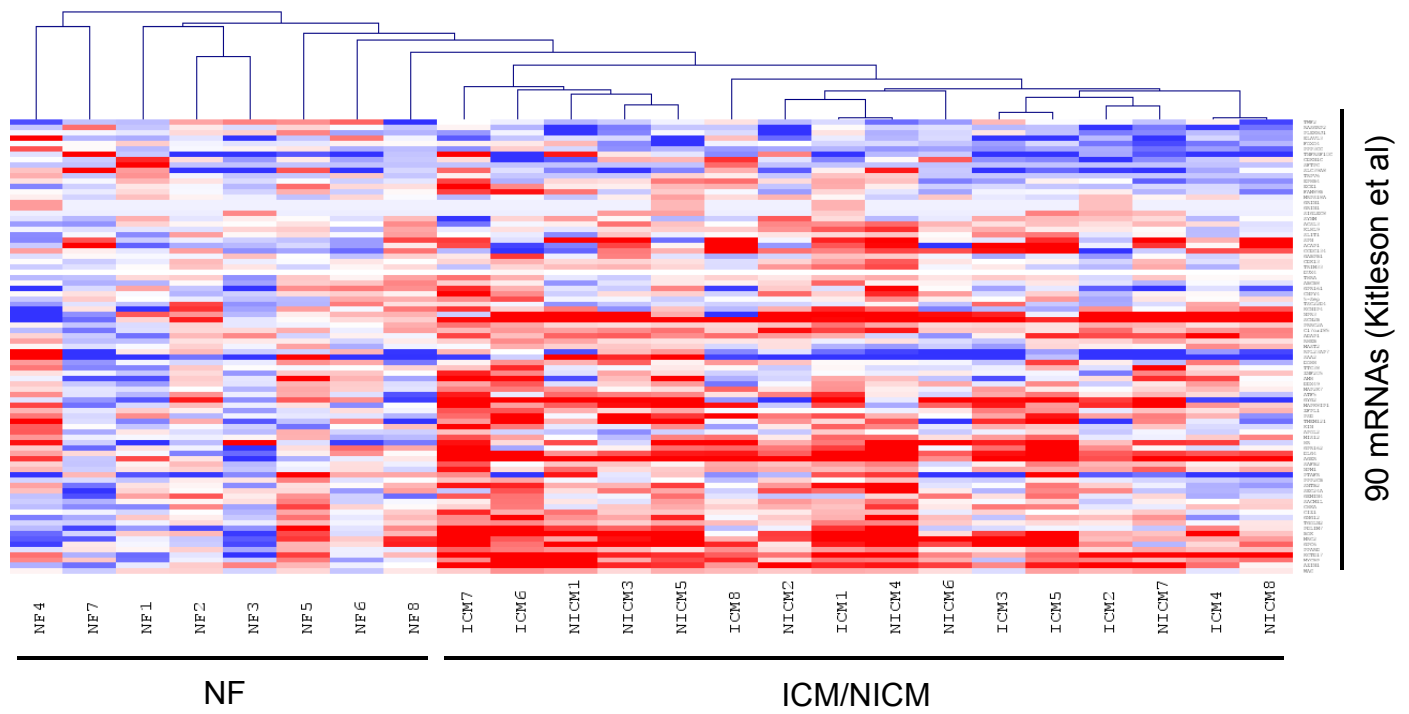

B

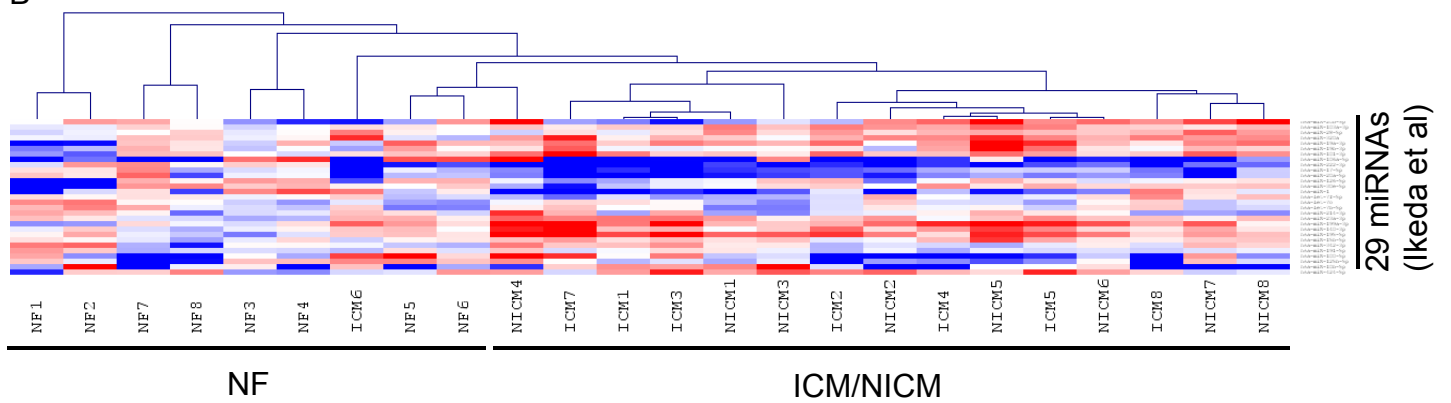

Supplemental Figure 5. Expression profiles of a subset of previously reported mRNA and miRNA failed to discriminate between ICM and NICM samples



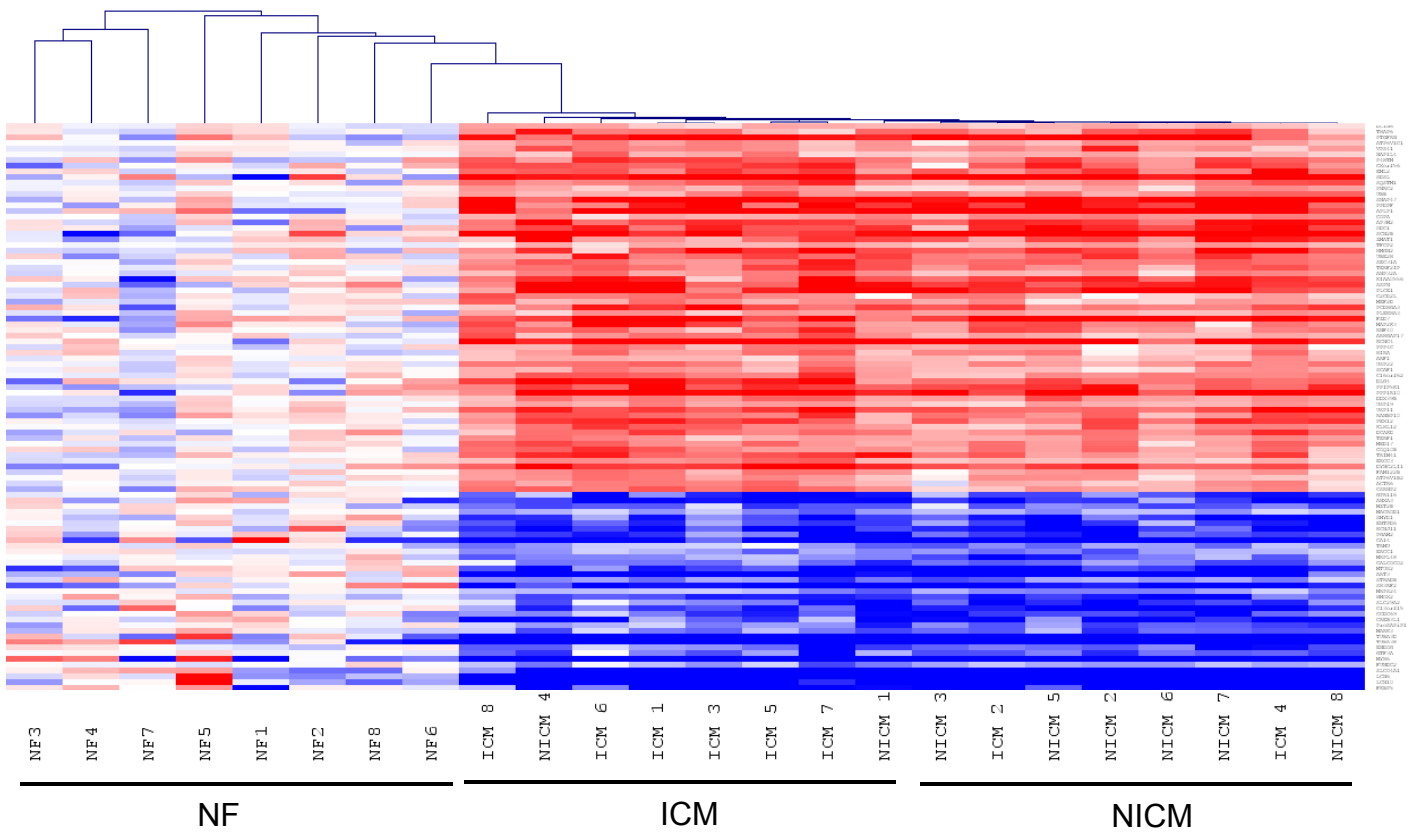

Supplemental Figure 6. Proper selection of classifier genes improves the power of mRNA dendrogram to distinguish cardiomyopathic samples

A

lncRNA

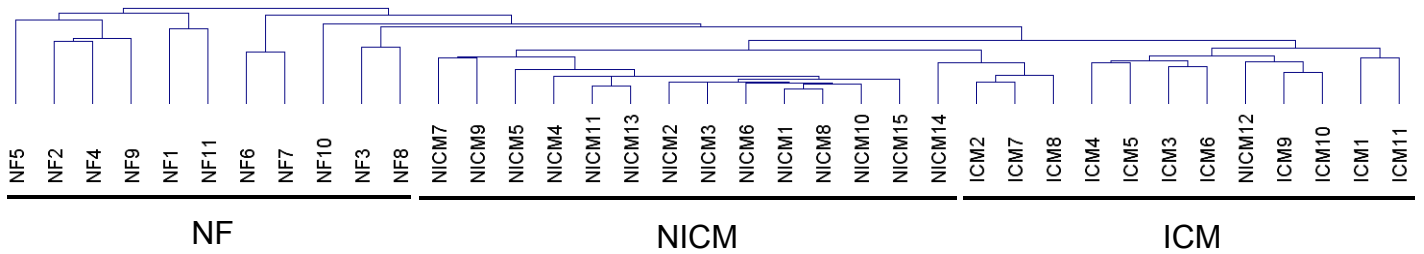

B

mRNA

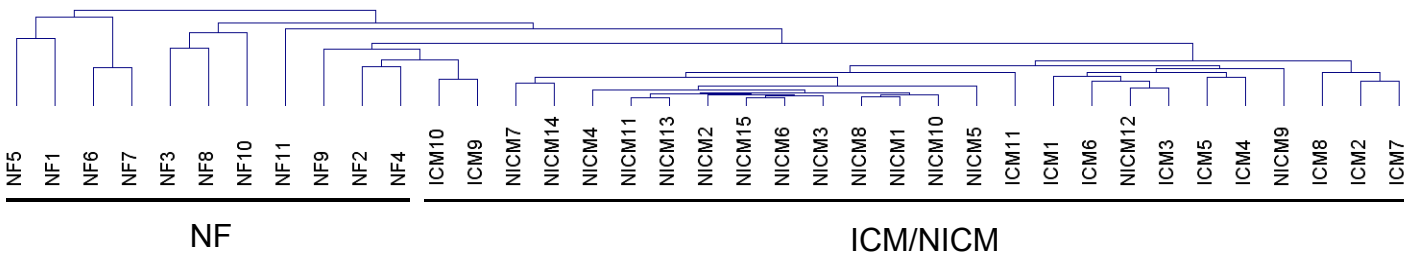

Supplemental Figure 7. Clustering dendrograms of the lncRNA and mRNA expression profiles from CardioGenomics microarray data demonstrated that lncRNAs, but not mRNAs, provide adequate power to discriminate cardiomyopathic samples by etiology

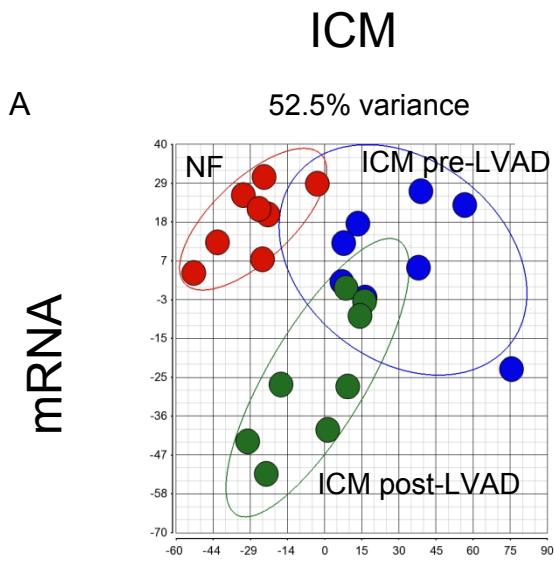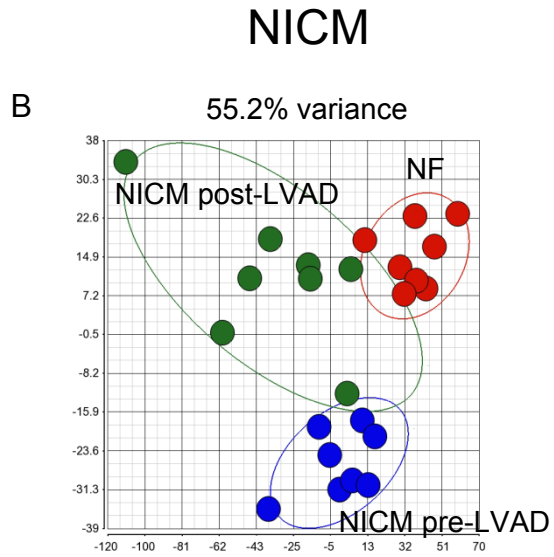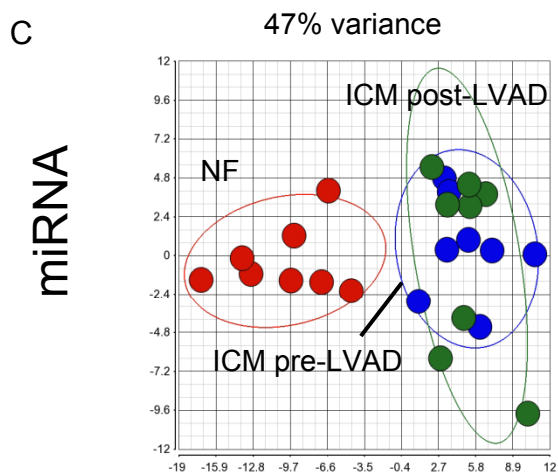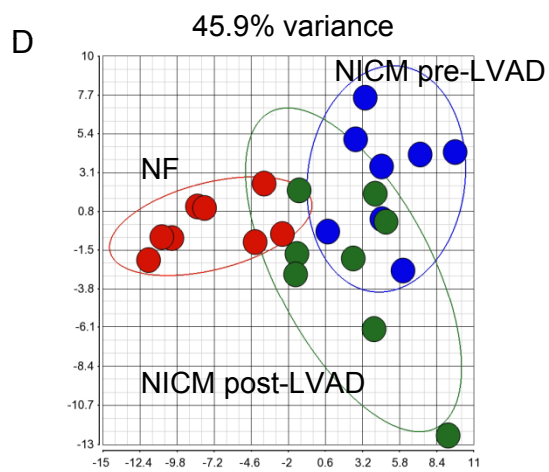

Supplemental Figure 8. mRNA and miRNA expression signatures do not discriminate LV samples before and after LVAD support

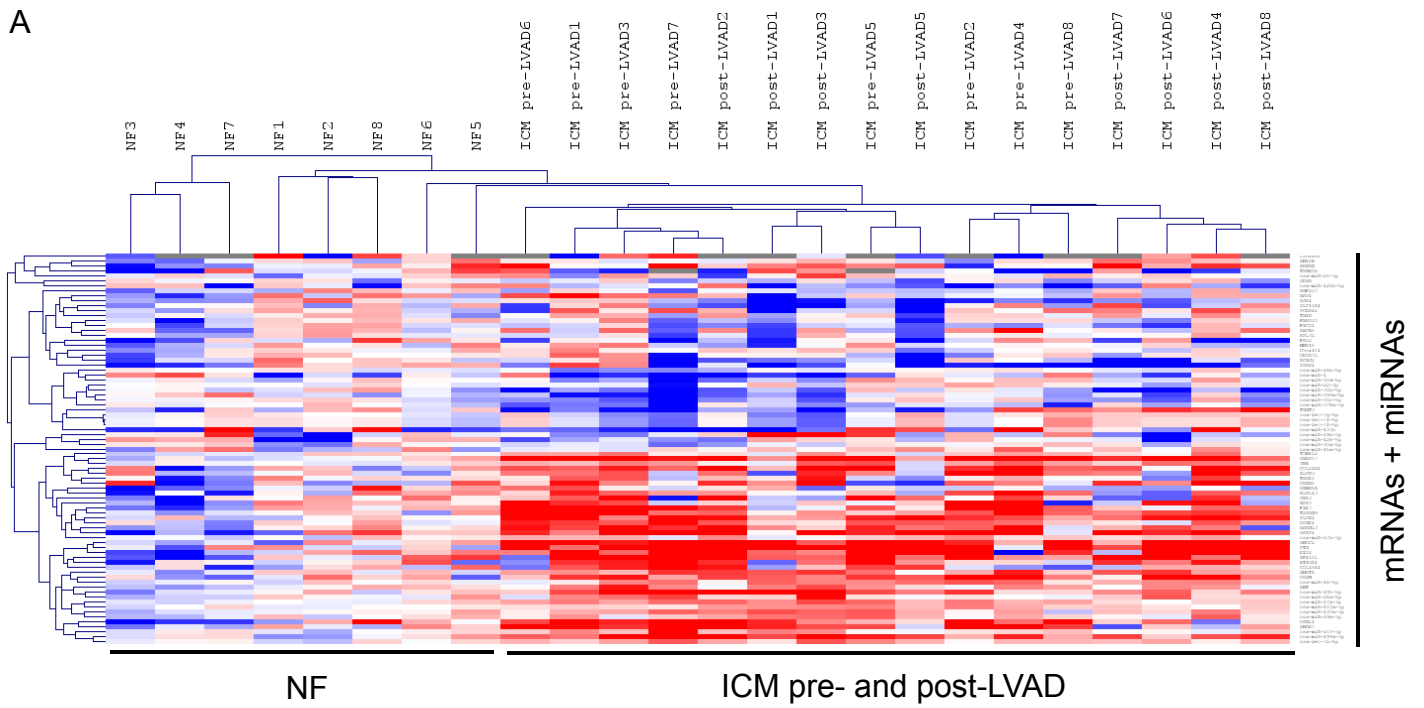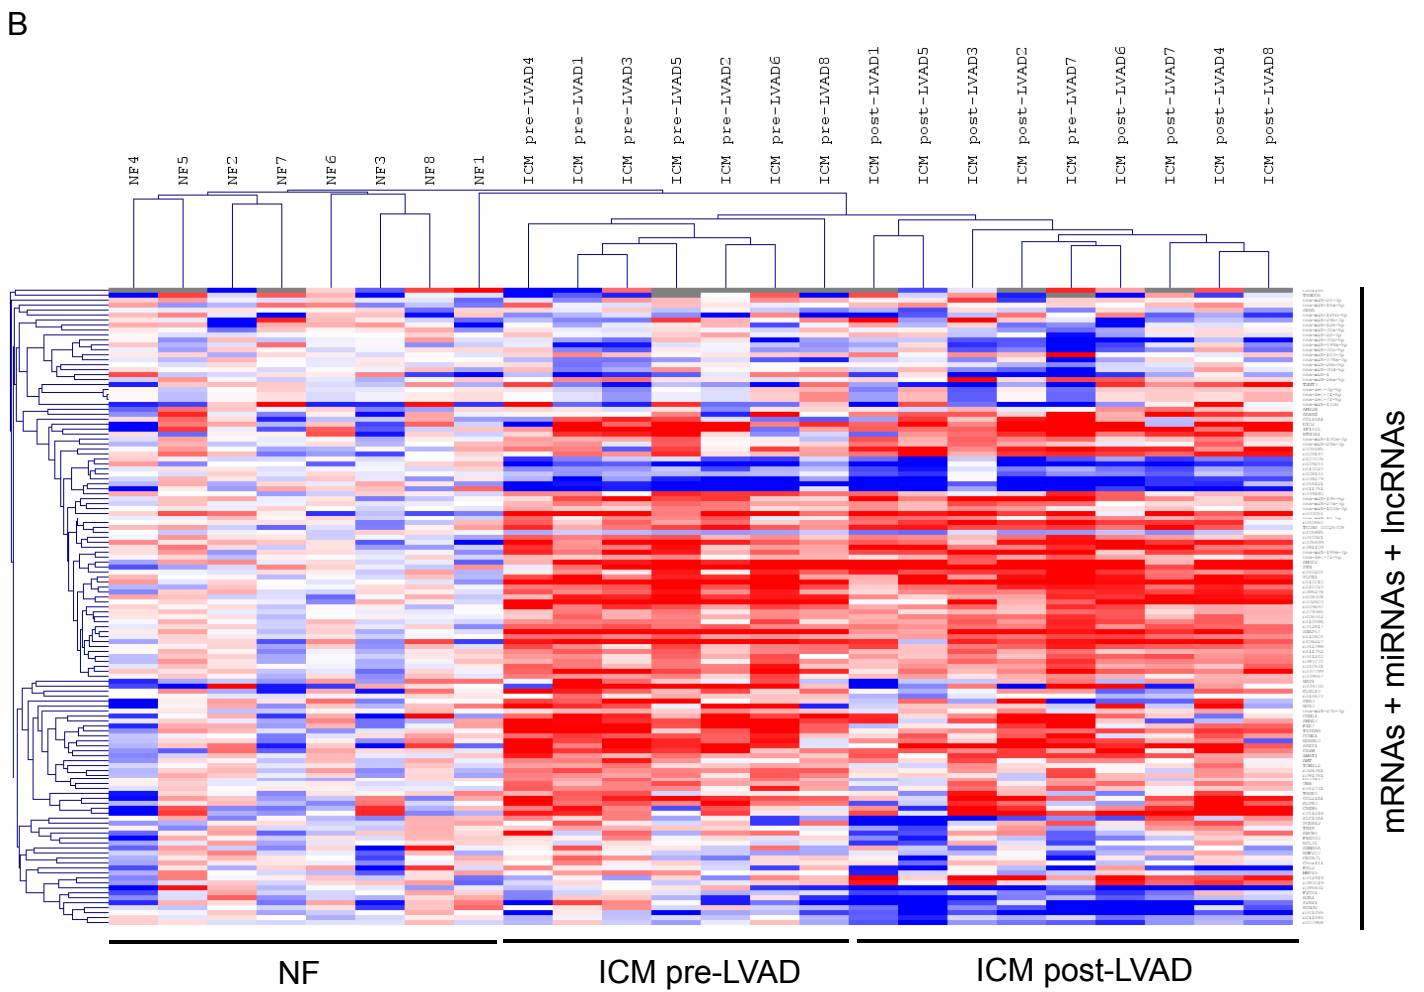

Supplemental Figure 9. Adding lncRNAs to combined mRNA and miRNA expression profiles increases the power to discriminate ICM samples before and after LVAD support.

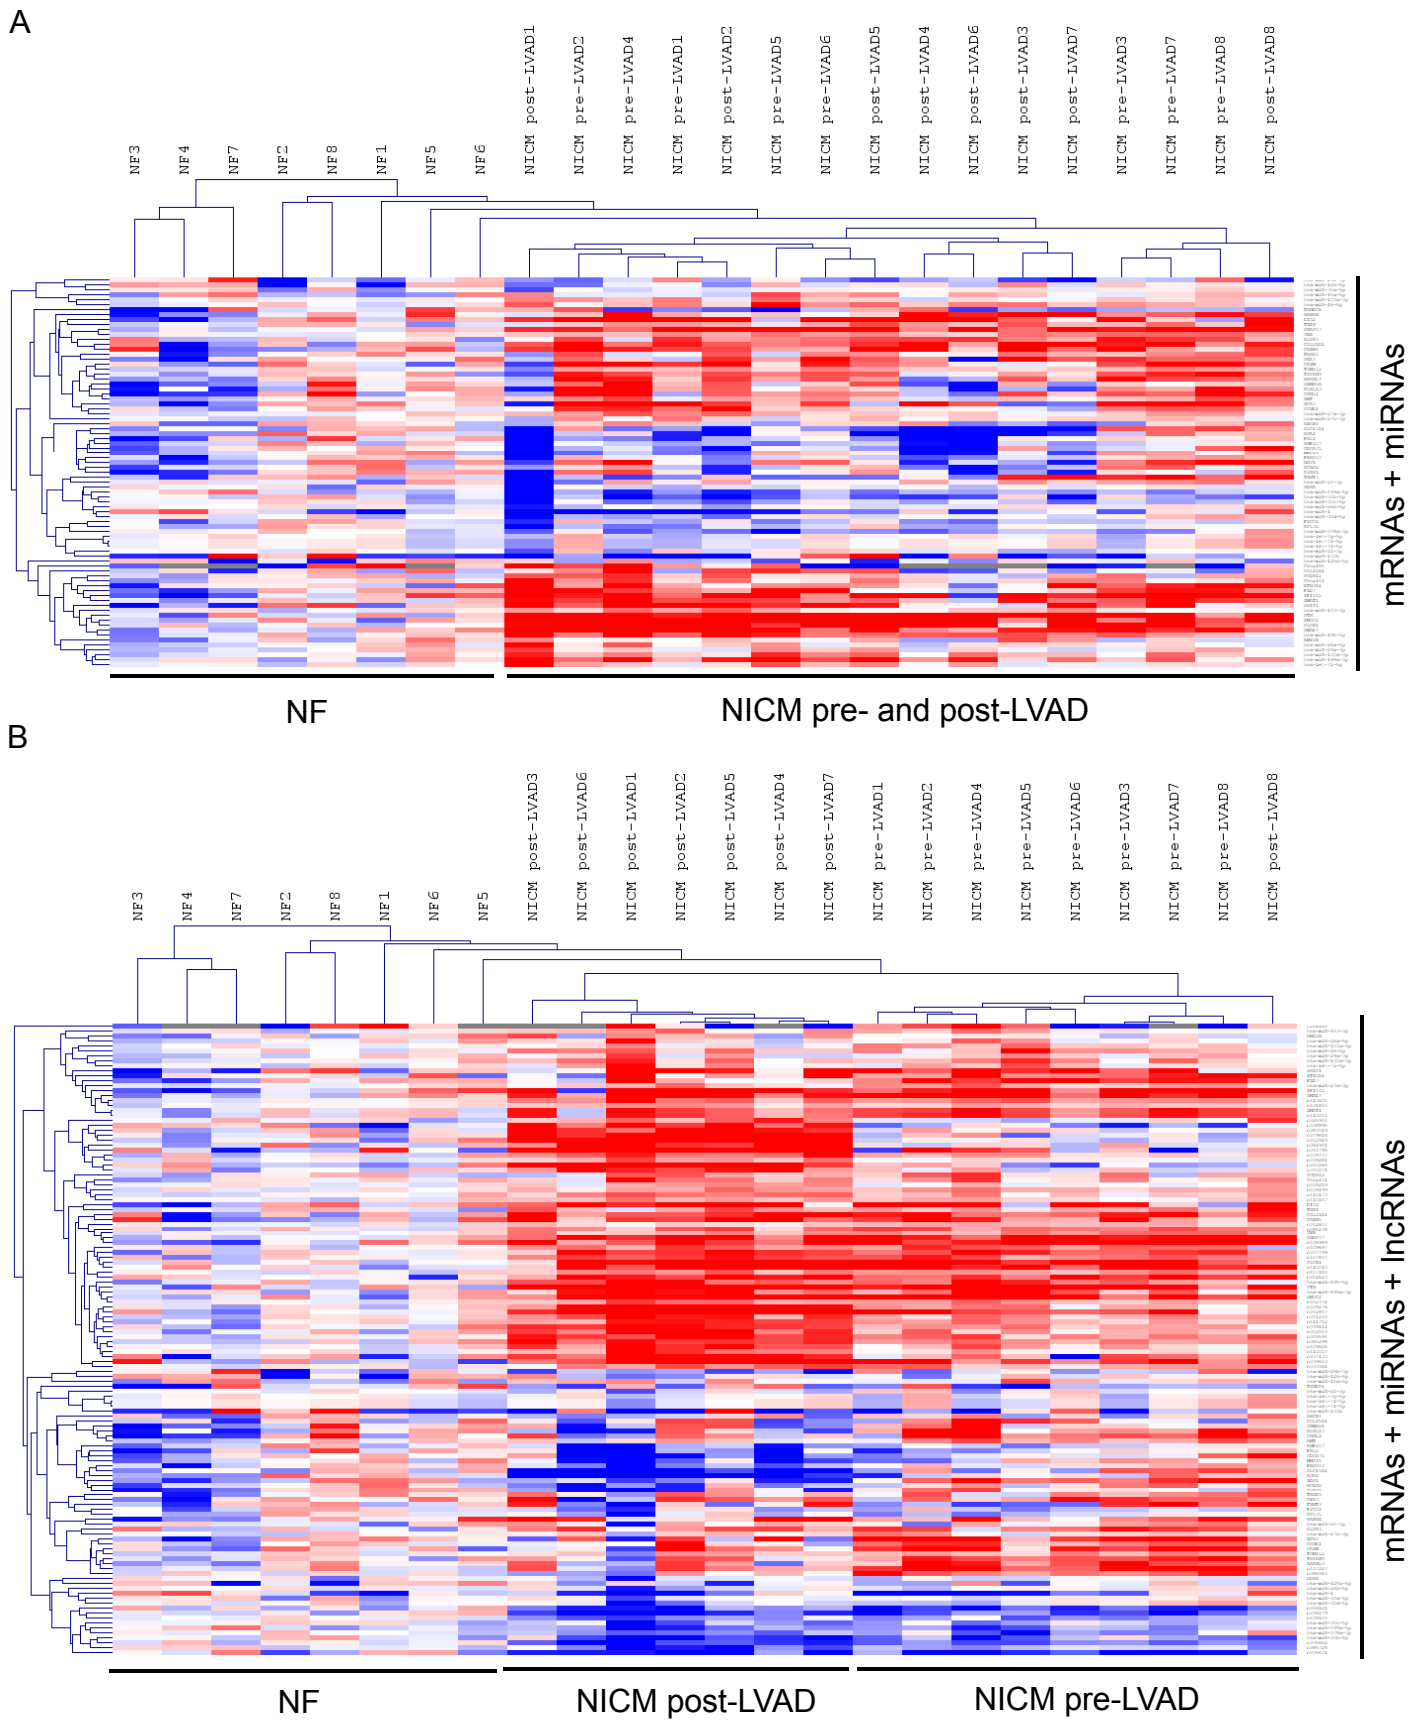

Supplemental Figure 10. Adding lncRNAs to combined mRNA and miRNA expression profiles increases the power to discriminate NICM samples before and after LVAD support.

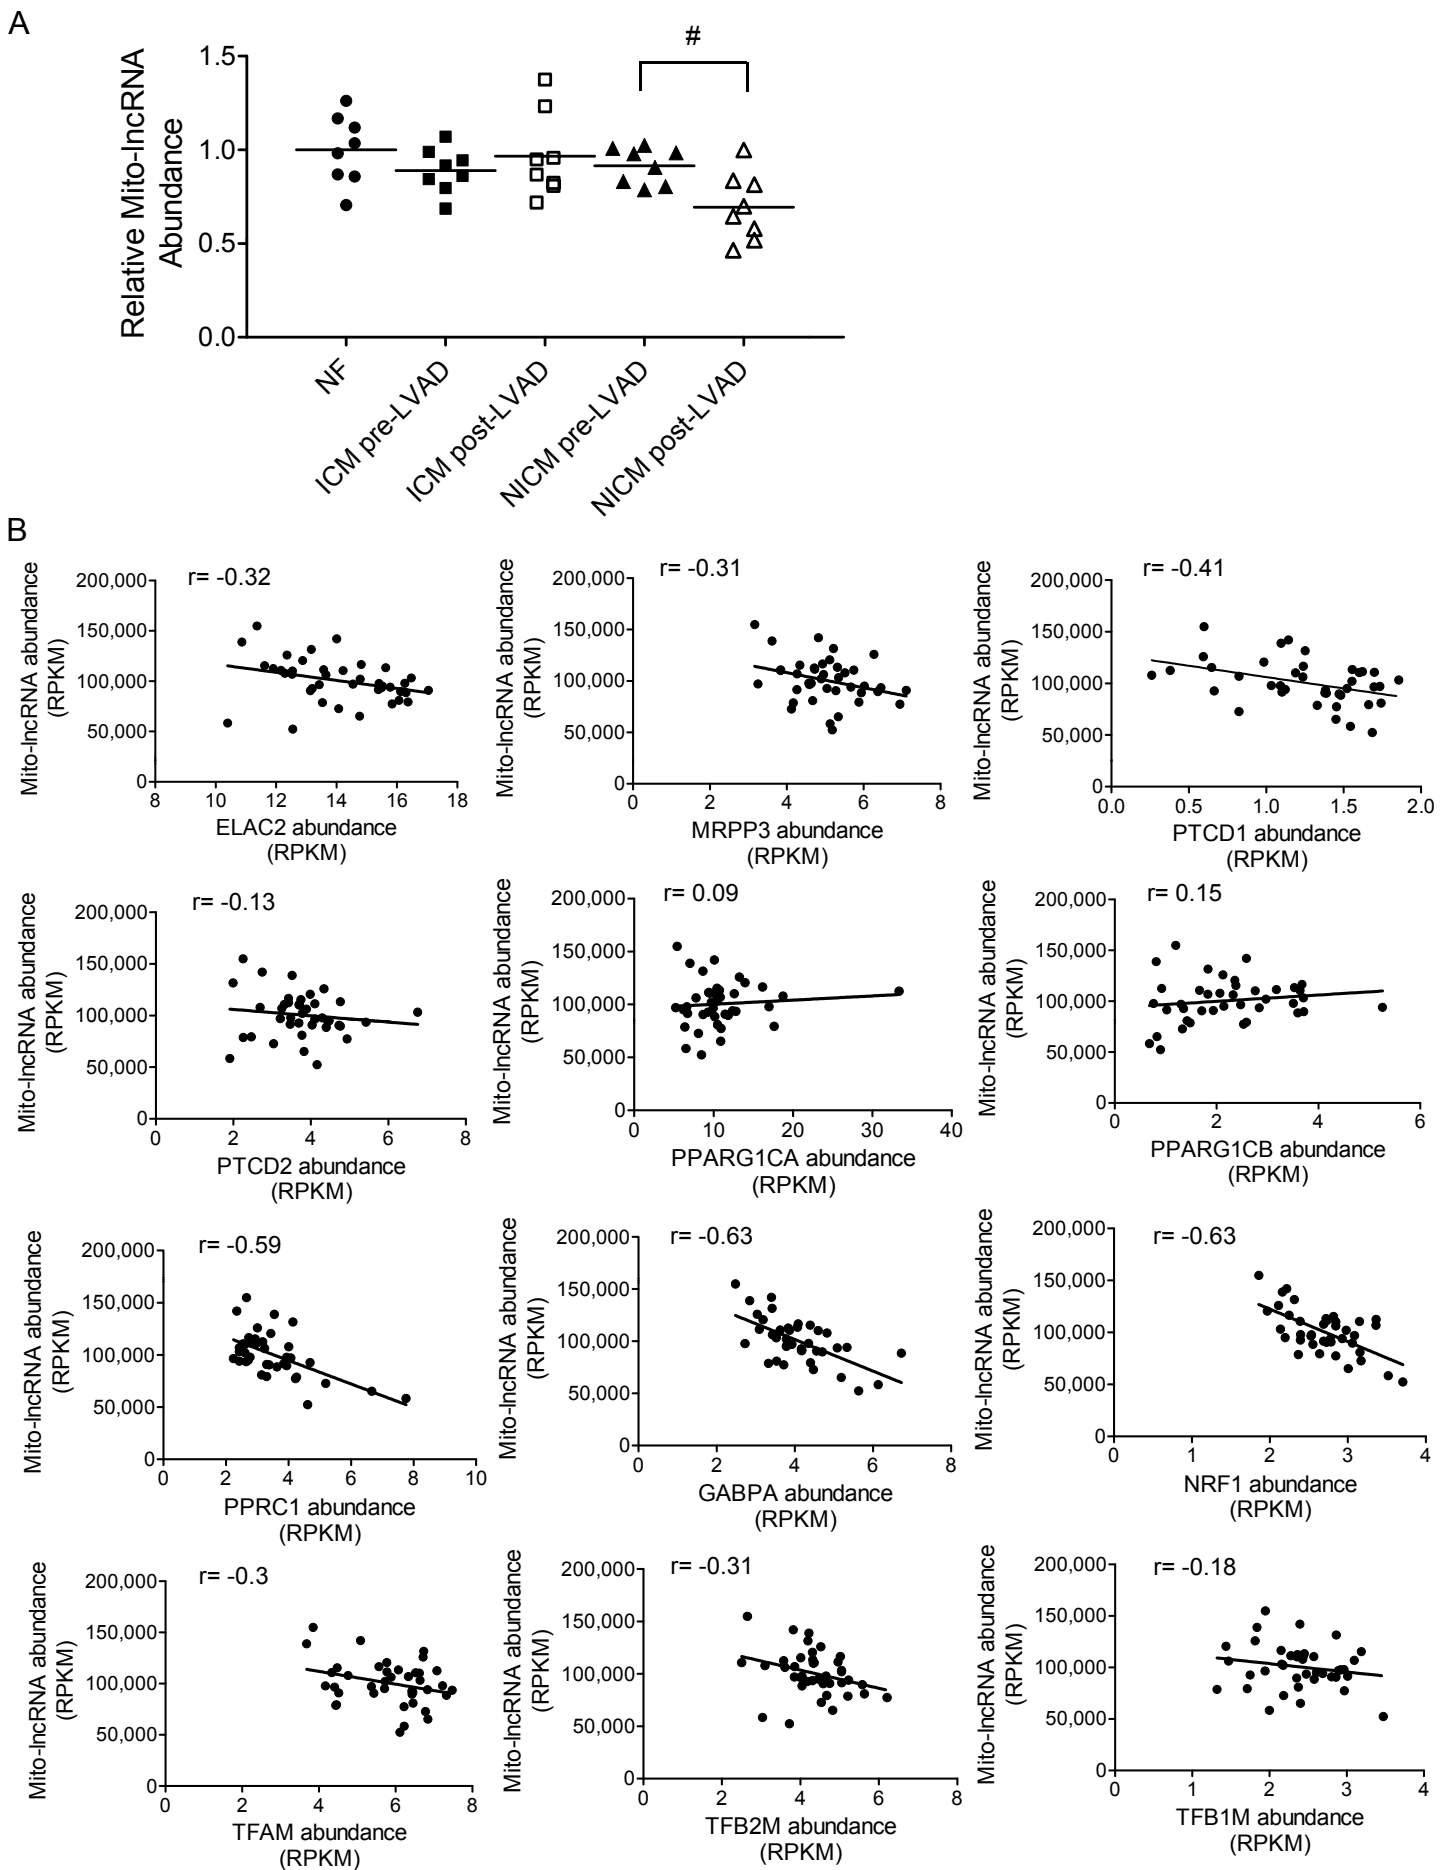

Supplemental Figure 11. Expression of cardiac mitochondrial lncRNAs is negatively associated with nuclear-encoded mitochondrial regulatory proteins.

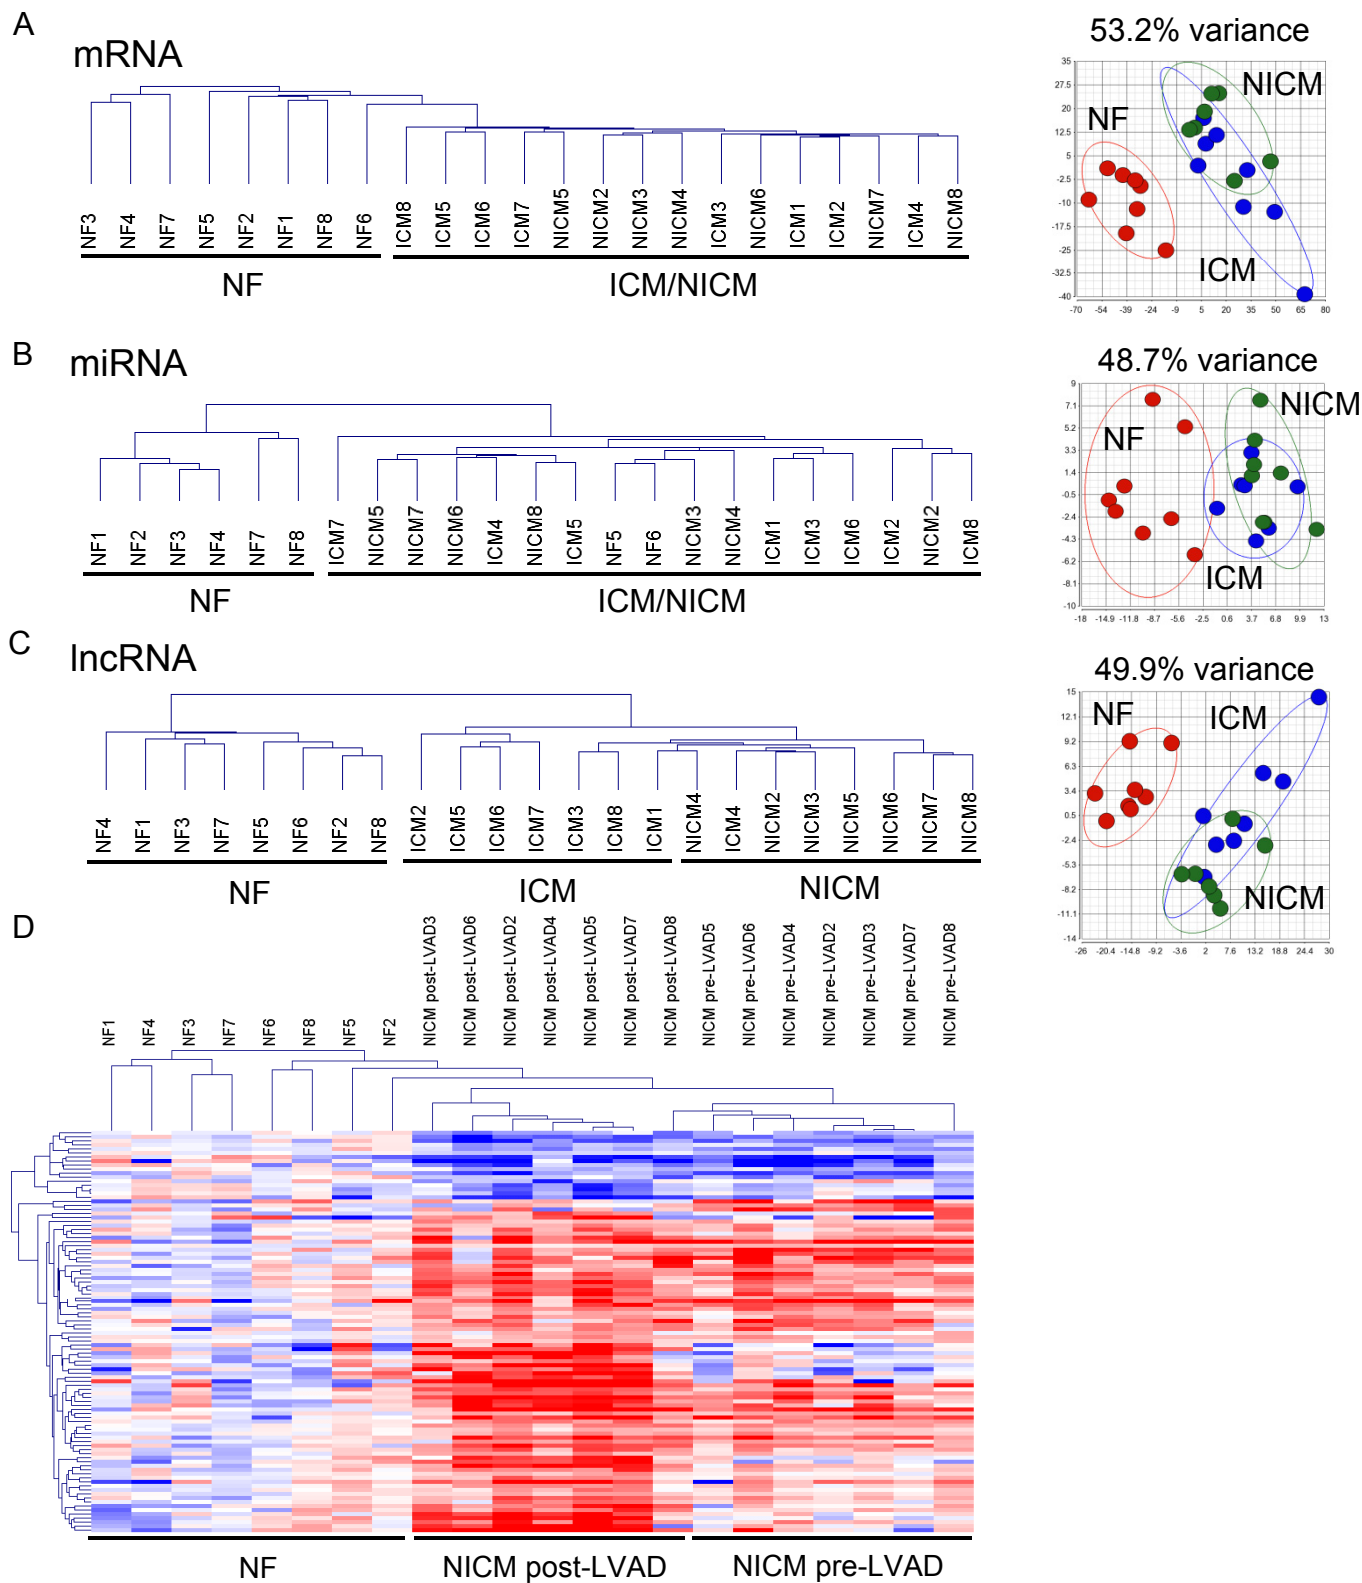

**E** Number of miRNA, mRNA and lncRNA that are differentially expressed in NICM (excluding one potential HCM sample, NICM1), and the percentage of each RNA species improved, normalized or overcorrected by LVAD support

| NICM (excluding NICM1)                | miRNA     | mRNA       | lncRNA     | P value* |
|---------------------------------------|-----------|------------|------------|----------|
| Total number differentially expressed | 149       | 1882       | 543        |          |
| Improved with LVAD support            | 12 (8.0%) | 121 (6.4%) | 68 (12.5%) | <0.0001  |
| Normalized with LVAD support          | 6 (4.0%)  | 60 (3.2%)  | 34 (6.3%)  | 0.0048   |
| Overcorrected with LVAD support       | 1 (0.7%)  | 54 (2.8%)  | 17 (3.1%)  |          |

\*Chi-square test

Supplemental Figure 12. Additional analyses excluding one potential hypertrophic cardiomyopathy sample did not reveal significant differences from the primary results

Table S1. Summary of the clinical parameters and medical histories of HF patients included in the present study

| Sample # | Sex | Race | Age (yr) | Diagnosis | Devices |     |      |               | Surgery        | Comorbidities |               |    |                    | Pre-VAD |       |       | Post-VAD | Pre-VAD Echo |        | Post-VAD Echo |        | Medication |        |      |       |         |          |       |          | Arrhythmia History |             |      |    |
|----------|-----|------|----------|-----------|---------|-----|------|---------------|----------------|---------------|---------------|----|--------------------|---------|-------|-------|----------|--------------|--------|---------------|--------|------------|--------|------|-------|---------|----------|-------|----------|--------------------|-------------|------|----|
|          |     |      |          |           | ICD     | BIV | LVAD | Months of VAD |                | MI/CAD        | Valve Disease | DM | History of Smoking | PAH     | PAP   | PAP   |          | LVEDD (cm)   | EF (%) | LVEDD (cm)    | EF (%) | ASA        | Statin | Amio | Mexil | β-Block | Inotrope | ACE-I | Coumadin | Atrial             | Ventricular |      |    |
| ICM1     | M   | B    | 54       | ICM       | ✓       | ✓   | ✓    | 5.6           | CABG           | Y             | severe PR     | Y  | Y                  | Y       | 53/30 | 34/15 | 6.8      | 20-25        | 6      | <25           | ✓      | ✓          | ✓      |      | ✓     |         | ✓        | ✓     |          |                    |             |      | VF |
| ICM2     | M   | W    | 55       | ICM       | ✓       | ✓   | ✓    | 3.7           | CABG           | Y             | N             | N  | Y                  | Y       | 66/32 | 41/24 | 6.6      | 21           | 6.2    | 10            | ✓      | ✓          |        | ✓    |       |         |          | ✓     |          |                    |             |      |    |
| ICM3     | M   | W    | 63       | ICM       | ✓       | ✓   | ✓    | 16.9          | CABG           | Y             | N             | N  | Y                  | Y       | 27/19 | 21/10 |          | <15          | 5.7    | <20           | ✓      | ✓          | ✓      |      |       |         |          | ✓     |          |                    |             | AF   |    |
| ICM4     | M   | W    | 65       | ICM       | ✓       |     | ✓    | 18.9          | CABG           | Y             | severe MR     | N  | Y                  | Y       | 66/24 | 25/18 | 6        | 22           | 5.2    | <20           | ✓      | ✓          | ✓      |      |       |         |          |       |          |                    |             | AF   |    |
| ICM5     | M   | W    | 65       | ICM       |         |     | ✓    | 4.8           |                | Y             | mild          | Y  | N                  | Y       | 58/27 | 29/22 | 6.6      | 17           | 4.9    | 18            | ✓      | ✓          |        | ✓    |       |         |          | ✓     |          |                    |             | AF   |    |
| ICM6     | M   | W    | 67       | ICM       | ✓       |     | ✓    | 14.1          | stents, bIVADs | Y             | AR, TR, MR    | Y  | Y                  | Y       | 50/26 | 23/11 | 7.9      | 10           | 7.7    | <20           | ✓      | ✓          |        | ✓    | ✓     | ✓       | ✓        | ✓     |          |                    |             |      |    |
| ICM7     | M   | B    | 62       | ICM       | ✓       |     | ✓    | 4.6           |                | Y             | severe TR/MR  | Y  | N                  | Y       | 39/25 | ND    | 8        | 10           | 2.9    | 10            | ✓      | ✓          | ✓      | ✓    | ✓     |         |          |       |          |                    |             | AF   |    |
| ICM8     | M   | W    | 66       | ICM       |         |     | ✓    | 6.8           | AV repair      | Y             | mild MR,AR    | N  | Y                  | Y       | 76/38 | ND    | 7.4      | 24           | 6.3    | 35            | ✓      | ✓          | ✓      |      | ✓     | ✓       | ✓        | ✓     |          |                    |             | VT   |    |
| NICM1    | F   | W    | 65       | NICM      | ✓       | ✓   | ✓    | 4.2           | myectomy       | N             | mild          | N  | Y                  | Y       | 40/26 | 27/17 |          | 15           | 4      | <20           |        |            | ✓      |      |       |         |          | ✓     |          |                    | AF          |      |    |
| NICM2    | M   | W    | 48       | NICM      | ✓       | ✓   | ✓    | 3.9           |                | N             | mild          | N  | N                  | Y       | 47/31 | 27/19 | 7.6      | 10-15        | 7.4    | <20           | ✓      |            |        | ✓    | ✓     | ✓       |          | ✓     |          |                    | AF          | VT   |    |
| NICM3    | F   | W    | 35       | NICM      |         |     | ✓    | 5.6           |                | N             | mild          | Y  | Y                  | 35/19   | 21/12 | 6.4   | 20-25%   | 5.1          | 20     | ✓             |        |            | ✓      |      |       |         |          | ✓     |          |                    |             |      |    |
| NICM4    | M   | W    | 53       | NICM      | ✓       | ✓   | ✓    | 9.8           |                | N             | MR            | N  | N                  | Y       | 37/17 | 29/17 | 7        | 15           | 7.8    | 5             | ✓      | ✓          | ✓      |      | ✓     |         |          | ✓     |          |                    |             | VF   |    |
| NICM5    | M   | W    | 58       | NICM      | ✓       | ✓   | ✓    | 5.6           |                | N             | severe MR     | N  | Y                  | Y       | 40/21 | 14/5  | 8.1      | 12           |        | <20           | ✓      | ✓          |        | ✓    |       |         |          | ✓     |          |                    | SVT         | VT   |    |
| NICM6    | M   | W    | 60       | NICM      | ✓       |     | ✓    | 15.7          |                | N             | N             | Y  | Y                  | Y       | 36/18 | 33/18 |          | 15           | 6.3    | <35           | ✓      | ✓          | ✓      |      | ✓     |         |          | ✓     |          |                    |             | NSVT |    |
| NICM7    | F   | B    | 55       | NICM      | ✓       |     | ✓    | 19.5          |                | N             | N             | Y  | N                  | Y       | 64/36 | 41/23 | 6.4      | 13           | 5.4    | <20           | ✓      | ✓          | ✓      |      |       | ✓       |          |       | ✓        |                    |             | AF   |    |
| NICM8    | M   | B    | 64       | NICM      | ✓       | ✓   | ✓    | 23.0          |                | N             | mild          | N  | N                  | Y       | 56/22 | 5/2   | 6.8      | <10          | 4.5    | 25            | ✓      |            | ✓      |      | ✓     | ✓       |          |       | ✓        |                    |             | AF   | VT |

CABG = coronary artery bypass graft; MI/CAD = myocardial infarction/coronary artery disease; Y = yes, N = no;  
 PR = pulmonic valve regurgitation, MR = mitral valve regurgitation, AR = aortic valve regurgitation, TR = tricuspid valve regurgitation; DM = diabetes mellitus;  
 PAH = pulmonary artery hypertension, PAP = pulmonary artery pressure; ND = not determined; LVEDD = left ventricular end diastolic dimension, EF = ejection fraction;  
 ASA = acetylsalicylic acid, Amio = amiodarone, Mexil = mexiletine, ACE-I = angiotensin converting enzyme inhibitor;  
 AF = atrial fibrillation, SVT = supraventricular tachycardia, VF = ventricular fibrillation, VT = ventricular tachycardia; NSVT = nonsustained VT



| Table S2. Summary of the clinical information of non-failing heart donors included in the present study |                   |     |     |             |    |     |
|---------------------------------------------------------------------------------------------------------|-------------------|-----|-----|-------------|----|-----|
| ID                                                                                                      | Cause of Death    | Age | Sex | Smoker (yr) | DM | HTN |
| NF1                                                                                                     | stroke            | 58  | M   | 35          |    |     |
| NF2                                                                                                     | gunshot wound     | 53  | M   | 41          |    | +   |
| NF3                                                                                                     | stroke            | 53  | M   | 1           |    |     |
| NF4                                                                                                     | anoxia            | 51  | M   |             |    | +   |
| NF5                                                                                                     | stroke            | 58  | F   |             |    |     |
| NF6                                                                                                     | stroke            | 60  | M   | 20          | +  | +   |
| NF7                                                                                                     | blunt head trauma | 52  | M   |             |    |     |
| NF8                                                                                                     | anoxia            | 54  | M   |             |    |     |





















































































|      |    |    |    |    |    |    |    |    |    |    |    |    |    |    |    |    |    |    |    |    |    |    |    |     |     |     |     |     |     |     |     |     |     |     |     |     |     |     |     |     |     |     |     |     |     |     |     |     |     |     |     |     |     |     |     |     |     |     |     |     |     |     |     |     |     |     |     |     |     |     |     |     |     |     |     |     |     |     |     |     |     |     |     |     |     |     |     |     |     |     |     |     |     |     |     |     |     |     |     |     |     |     |     |     |     |     |     |     |     |     |     |     |     |     |     |     |     |     |     |     |     |     |     |     |     |     |     |     |     |     |     |     |     |     |     |     |     |     |     |     |     |     |     |     |     |     |     |     |     |     |     |     |     |     |     |     |     |     |     |     |     |     |     |     |     |     |     |     |     |     |     |     |     |     |     |     |     |     |     |     |     |     |     |     |     |     |     |     |     |     |     |     |     |     |     |     |     |     |     |     |     |     |     |     |     |     |     |     |     |     |     |     |     |     |     |     |     |     |     |     |     |     |     |     |     |     |     |     |     |     |     |     |     |     |     |     |     |     |     |     |     |     |     |     |     |     |     |     |      |      |      |      |      |      |      |      |      |      |      |      |      |      |      |      |      |      |      |      |      |      |      |      |      |      |      |      |      |      |      |      |      |      |      |      |      |      |      |      |      |      |      |      |      |      |      |      |      |      |      |      |      |      |      |      |      |      |      |      |      |      |      |      |      |      |      |      |      |      |      |      |      |      |      |      |      |      |      |      |      |      |      |      |      |      |      |      |      |      |      |      |      |      |      |      |      |      |      |      |      |      |      |      |      |      |      |      |      |      |      |      |      |      |      |      |      |      |      |      |      |      |      |      |      |      |      |      |      |      |      |      |      |      |      |      |      |      |      |      |      |      |      |      |      |      |      |      |      |      |      |      |      |      |      |      |      |      |      |      |      |      |      |      |      |      |      |      |      |      |      |      |      |      |      |      |      |      |      |      |      |      |      |      |      |      |      |      |      |      |      |      |      |      |      |      |      |      |      |      |      |      |      |      |      |      |      |      |      |      |      |      |      |      |      |      |      |      |      |      |      |      |      |      |      |      |      |      |      |      |      |      |      |      |      |      |      |      |      |      |      |      |      |      |      |      |      |      |      |      |      |      |      |      |      |      |      |      |      |      |      |      |      |      |      |      |      |      |      |      |      |      |      |      |      |      |      |      |      |      |      |      |      |      |      |      |      |      |      |      |      |      |      |      |      |      |      |      |      |      |      |      |      |      |      |      |      |      |      |      |      |      |      |      |      |      |      |      |      |      |      |      |      |      |      |      |      |      |      |      |      |      |      |      |      |      |      |      |      |      |      |      |      |      |      |      |      |      |      |      |      |      |      |      |      |      |      |      |      |      |      |      |      |      |      |      |      |      |      |      |      |      |      |      |      |      |      |      |      |      |      |      |      |      |      |      |      |      |      |      |      |      |      |      |      |      |      |      |      |      |      |      |      |      |      |      |      |      |      |      |      |      |      |      |      |      |      |      |      |      |      |      |      |      |      |      |      |      |      |      |      |      |      |      |      |      |      |      |      |      |      |      |      |      |      |      |      |      |      |      |      |      |      |      |      |      |      |      |      |      |      |      |      |      |      |      |      |      |      |      |      |      |      |      |      |      |      |      |      |      |      |      |      |      |      |      |      |      |      |      |      |      |      |      |      |      |      |      |      |      |      |      |      |      |      |      |      |      |      |      |      |      |      |      |      |      |      |      |      |      |      |      |      |      |      |      |      |      |      |      |      |      |      |      |      |      |      |      |      |      |      |      |      |      |      |      |      |      |      |      |      |      |      |      |      |      |      |      |      |      |      |      |      |      |      |      |      |      |      |      |      |      |      |      |      |      |      |      |      |      |      |      |      |      |      |      |      |      |      |      |      |      |      |      |      |      |      |      |      |      |      |      |      |      |      |      |      |      |      |      |      |      |      |      |      |      |      |      |      |      |      |      |      |      |      |      |      |      |      |      |      |      |      |      |      |      |      |      |      |      |      |      |      |      |      |      |      |      |      |      |      |      |      |      |      |      |      |      |      |      |      |      |      |      |      |      |      |      |      |      |      |      |      |      |      |      |      |      |      |      |      |      |      |      |      |      |      |      |      |      |      |      |      |      |      |      |      |      |      |      |      |      |      |      |      |      |      |      |      |      |      |      |      |      |      |      |      |      |      |      |      |      |      |      |      |      |      |      |      |      |      |      |      |      |      |      |      |      |      |      |      |      |      |      |      |      |      |      |      |      |      |      |      |      |      |      |      |      |      |      |      |      |      |      |      |      |      |      |      |      |      |      |      |      |      |      |      |      |      |      |      |      |      |      |      |      |      |      |      |      |      |      |      |      |      |      |      |      |      |      |      |      |      |      |      |      |      |      |      |      |      |      |      |      |      |      |      |      |      |      |      |      |      |      |      |      |      |      |      |      |      |      |      |      |      |      |      |      |      |      |      |      |      |      |      |      |      |      |      |      |      |      |      |      |      |      |      |      |      |      |      |      |      |      |      |      |      |      |      |      |      |      |      |      |      |      |      |      |      |      |      |      |      |      |      |      |      |      |      |      |      |      |      |      |      |      |      |      |      |      |      |      |      |      |      |      |      |      |      |      |      |      |      |      |      |      |      |      |      |      |      |      |      |      |      |      |      |      |      |      |      |      |      |      |      |      |      |      |      |      |      |      |      |      |      |      |      |      |      |      |      |      |      |      |      |      |      |      |      |      |      |      |      |      |      |      |      |      |      |      |      |      |      |      |      |      |      |      |      |      |      |      |      |      |      |      |      |      |      |      |      |      |      |      |      |      |      |      |      |      |      |      |      |      |      |      |      |      |      |      |      |      |      |      |      |      |      |      |      |      |      |      |      |      |      |      |      |      |      |      |      |      |      |      |      |      |      |      |      |      |      |      |      |      |      |      |      |      |      |      |      |      |      |      |      |      |      |      |      |      |      |      |      |      |      |      |      |      |      |      |      |      |      |      |      |      |      |      |      |      |      |      |      |      |      |      |      |      |      |      |      |      |      |      |      |      |      |      |      |      |      |      |      |      |      |      |      |      |      |      |      |      |      |      |      |      |      |      |      |      |      |      |      |      |      |      |      |      |      |      |      |      |      |      |      |      |      |      |      |      |      |      |      |      |      |      |      |      |      |      |      |      |      |     |
|------|----|----|----|----|----|----|----|----|----|----|----|----|----|----|----|----|----|----|----|----|----|----|----|-----|-----|-----|-----|-----|-----|-----|-----|-----|-----|-----|-----|-----|-----|-----|-----|-----|-----|-----|-----|-----|-----|-----|-----|-----|-----|-----|-----|-----|-----|-----|-----|-----|-----|-----|-----|-----|-----|-----|-----|-----|-----|-----|-----|-----|-----|-----|-----|-----|-----|-----|-----|-----|-----|-----|-----|-----|-----|-----|-----|-----|-----|-----|-----|-----|-----|-----|-----|-----|-----|-----|-----|-----|-----|-----|-----|-----|-----|-----|-----|-----|-----|-----|-----|-----|-----|-----|-----|-----|-----|-----|-----|-----|-----|-----|-----|-----|-----|-----|-----|-----|-----|-----|-----|-----|-----|-----|-----|-----|-----|-----|-----|-----|-----|-----|-----|-----|-----|-----|-----|-----|-----|-----|-----|-----|-----|-----|-----|-----|-----|-----|-----|-----|-----|-----|-----|-----|-----|-----|-----|-----|-----|-----|-----|-----|-----|-----|-----|-----|-----|-----|-----|-----|-----|-----|-----|-----|-----|-----|-----|-----|-----|-----|-----|-----|-----|-----|-----|-----|-----|-----|-----|-----|-----|-----|-----|-----|-----|-----|-----|-----|-----|-----|-----|-----|-----|-----|-----|-----|-----|-----|-----|-----|-----|-----|-----|-----|-----|-----|-----|-----|-----|-----|-----|-----|-----|-----|-----|-----|-----|-----|-----|-----|-----|-----|-----|-----|-----|-----|-----|-----|-----|-----|-----|-----|------|------|------|------|------|------|------|------|------|------|------|------|------|------|------|------|------|------|------|------|------|------|------|------|------|------|------|------|------|------|------|------|------|------|------|------|------|------|------|------|------|------|------|------|------|------|------|------|------|------|------|------|------|------|------|------|------|------|------|------|------|------|------|------|------|------|------|------|------|------|------|------|------|------|------|------|------|------|------|------|------|------|------|------|------|------|------|------|------|------|------|------|------|------|------|------|------|------|------|------|------|------|------|------|------|------|------|------|------|------|------|------|------|------|------|------|------|------|------|------|------|------|------|------|------|------|------|------|------|------|------|------|------|------|------|------|------|------|------|------|------|------|------|------|------|------|------|------|------|------|------|------|------|------|------|------|------|------|------|------|------|------|------|------|------|------|------|------|------|------|------|------|------|------|------|------|------|------|------|------|------|------|------|------|------|------|------|------|------|------|------|------|------|------|------|------|------|------|------|------|------|------|------|------|------|------|------|------|------|------|------|------|------|------|------|------|------|------|------|------|------|------|------|------|------|------|------|------|------|------|------|------|------|------|------|------|------|------|------|------|------|------|------|------|------|------|------|------|------|------|------|------|------|------|------|------|------|------|------|------|------|------|------|------|------|------|------|------|------|------|------|------|------|------|------|------|------|------|------|------|------|------|------|------|------|------|------|------|------|------|------|------|------|------|------|------|------|------|------|------|------|------|------|------|------|------|------|------|------|------|------|------|------|------|------|------|------|------|------|------|------|------|------|------|------|------|------|------|------|------|------|------|------|------|------|------|------|------|------|------|------|------|------|------|------|------|------|------|------|------|------|------|------|------|------|------|------|------|------|------|------|------|------|------|------|------|------|------|------|------|------|------|------|------|------|------|------|------|------|------|------|------|------|------|------|------|------|------|------|------|------|------|------|------|------|------|------|------|------|------|------|------|------|------|------|------|------|------|------|------|------|------|------|------|------|------|------|------|------|------|------|------|------|------|------|------|------|------|------|------|------|------|------|------|------|------|------|------|------|------|------|------|------|------|------|------|------|------|------|------|------|------|------|------|------|------|------|------|------|------|------|------|------|------|------|------|------|------|------|------|------|------|------|------|------|------|------|------|------|------|------|------|------|------|------|------|------|------|------|------|------|------|------|------|------|------|------|------|------|------|------|------|------|------|------|------|------|------|------|------|------|------|------|------|------|------|------|------|------|------|------|------|------|------|------|------|------|------|------|------|------|------|------|------|------|------|------|------|------|------|------|------|------|------|------|------|------|------|------|------|------|------|------|------|------|------|------|------|------|------|------|------|------|------|------|------|------|------|------|------|------|------|------|------|------|------|------|------|------|------|------|------|------|------|------|------|------|------|------|------|------|------|------|------|------|------|------|------|------|------|------|------|------|------|------|------|------|------|------|------|------|------|------|------|------|------|------|------|------|------|------|------|------|------|------|------|------|------|------|------|------|------|------|------|------|------|------|------|------|------|------|------|------|------|------|------|------|------|------|------|------|------|------|------|------|------|------|------|------|------|------|------|------|------|------|------|------|------|------|------|------|------|------|------|------|------|------|------|------|------|------|------|------|------|------|------|------|------|------|------|------|------|------|------|------|------|------|------|------|------|------|------|------|------|------|------|------|------|------|------|------|------|------|------|------|------|------|------|------|------|------|------|------|------|------|------|------|------|------|------|------|------|------|------|------|------|------|------|------|------|------|------|------|------|------|------|------|------|------|------|------|------|------|------|------|------|------|------|------|------|------|------|------|------|------|------|------|------|------|------|------|------|------|------|------|------|------|------|------|------|------|------|------|------|------|------|------|------|------|------|------|------|------|------|------|------|------|------|------|------|------|------|------|------|------|------|------|------|------|------|------|------|------|------|------|------|------|------|------|------|------|------|------|------|------|------|------|------|------|------|------|------|------|------|------|------|------|------|------|------|------|------|------|------|------|------|------|------|------|------|------|------|------|------|------|------|------|------|------|------|------|------|------|------|------|------|------|------|------|------|------|------|------|------|------|------|------|------|------|------|------|------|------|------|------|------|------|------|------|------|------|------|------|------|------|------|------|------|------|------|------|------|------|------|------|------|------|------|------|------|------|------|------|------|------|------|------|------|------|------|------|------|------|------|------|------|------|------|------|------|------|------|------|------|------|------|------|------|------|------|------|------|------|------|------|------|------|------|------|------|------|------|------|------|------|------|------|------|------|------|------|------|------|------|------|------|------|------|------|------|------|------|------|------|------|------|------|------|------|------|------|------|------|------|------|------|------|------|------|------|------|------|------|------|------|------|------|------|------|------|------|------|------|------|------|------|------|------|------|------|------|------|------|------|------|------|------|------|------|------|------|------|------|------|------|------|------|------|------|------|------|------|------|------|------|------|------|------|------|------|------|------|------|------|------|------|------|------|------|------|------|------|------|------|------|------|------|------|------|------|------|------|------|------|------|------|------|------|------|------|------|------|------|------|------|------|------|------|------|------|------|------|------|------|------|------|------|------|------|------|------|------|------|------|------|------|------|------|------|------|------|------|------|------|------|------|------|------|------|------|------|------|------|------|------|------|------|------|------|------|------|------|------|------|------|------|------|------|------|------|------|------|------|------|------|------|------|------|------|------|------|------|------|------|------|------|------|------|------|------|------|------|------|-----|
| CCCC | 11 | 14 | 18 | 21 | 25 | 29 | 33 | 37 | 41 | 45 | 49 | 53 | 57 | 61 | 65 | 69 | 73 | 77 | 81 | 85 | 89 | 93 | 97 | 101 | 105 | 109 | 113 | 117 | 121 | 125 | 129 | 133 | 137 | 141 | 145 | 149 | 153 | 157 | 161 | 165 | 169 | 173 | 177 | 181 | 185 | 189 | 193 | 197 | 201 | 205 | 209 | 213 | 217 | 221 | 225 | 229 | 233 | 237 | 241 | 245 | 249 | 253 | 257 | 261 | 265 | 269 | 273 | 277 | 281 | 285 | 289 | 293 | 297 | 301 | 305 | 309 | 313 | 317 | 321 | 325 | 329 | 333 | 337 | 341 | 345 | 349 | 353 | 357 | 361 | 365 | 369 | 373 | 377 | 381 | 385 | 389 | 393 | 397 | 401 | 405 | 409 | 413 | 417 | 421 | 425 | 429 | 433 | 437 | 441 | 445 | 449 | 453 | 457 | 461 | 465 | 469 | 473 | 477 | 481 | 485 | 489 | 493 | 497 | 501 | 505 | 509 | 513 | 517 | 521 | 525 | 529 | 533 | 537 | 541 | 545 | 549 | 553 | 557 | 561 | 565 | 569 | 573 | 577 | 581 | 585 | 589 | 593 | 597 | 601 | 605 | 609 | 613 | 617 | 621 | 625 | 629 | 633 | 637 | 641 | 645 | 649 | 653 | 657 | 661 | 665 | 669 | 673 | 677 | 681 | 685 | 689 | 693 | 697 | 701 | 705 | 709 | 713 | 717 | 721 | 725 | 729 | 733 | 737 | 741 | 745 | 749 | 753 | 757 | 761 | 765 | 769 | 773 | 777 | 781 | 785 | 789 | 793 | 797 | 801 | 805 | 809 | 813 | 817 | 821 | 825 | 829 | 833 | 837 | 841 | 845 | 849 | 853 | 857 | 861 | 865 | 869 | 873 | 877 | 881 | 885 | 889 | 893 | 897 | 901 | 905 | 909 | 913 | 917 | 921 | 925 | 929 | 933 | 937 | 941 | 945 | 949 | 953 | 957 | 961 | 965 | 969 | 973 | 977 | 981 | 985 | 989 | 993 | 997 | 1001 | 1005 | 1009 | 1013 | 1017 | 1021 | 1025 | 1029 | 1033 | 1037 | 1041 | 1045 | 1049 | 1053 | 1057 | 1061 | 1065 | 1069 | 1073 | 1077 | 1081 | 1085 | 1089 | 1093 | 1097 | 1101 | 1105 | 1109 | 1113 | 1117 | 1121 | 1125 | 1129 | 1133 | 1137 | 1141 | 1145 | 1149 | 1153 | 1157 | 1161 | 1165 | 1169 | 1173 | 1177 | 1181 | 1185 | 1189 | 1193 | 1197 | 1201 | 1205 | 1209 | 1213 | 1217 | 1221 | 1225 | 1229 | 1233 | 1237 | 1241 | 1245 | 1249 | 1253 | 1257 | 1261 | 1265 | 1269 | 1273 | 1277 | 1281 | 1285 | 1289 | 1293 | 1297 | 1301 | 1305 | 1309 | 1313 | 1317 | 1321 | 1325 | 1329 | 1333 | 1337 | 1341 | 1345 | 1349 | 1353 | 1357 | 1361 | 1365 | 1369 | 1373 | 1377 | 1381 | 1385 | 1389 | 1393 | 1397 | 1401 | 1405 | 1409 | 1413 | 1417 | 1421 | 1425 | 1429 | 1433 | 1437 | 1441 | 1445 | 1449 | 1453 | 1457 | 1461 | 1465 | 1469 | 1473 | 1477 | 1481 | 1485 | 1489 | 1493 | 1497 | 1501 | 1505 | 1509 | 1513 | 1517 | 1521 | 1525 | 1529 | 1533 | 1537 | 1541 | 1545 | 1549 | 1553 | 1557 | 1561 | 1565 | 1569 | 1573 | 1577 | 1581 | 1585 | 1589 | 1593 | 1597 | 1601 | 1605 | 1609 | 1613 | 1617 | 1621 | 1625 | 1629 | 1633 | 1637 | 1641 | 1645 | 1649 | 1653 | 1657 | 1661 | 1665 | 1669 | 1673 | 1677 | 1681 | 1685 | 1689 | 1693 | 1697 | 1701 | 1705 | 1709 | 1713 | 1717 | 1721 | 1725 | 1729 | 1733 | 1737 | 1741 | 1745 | 1749 | 1753 | 1757 | 1761 | 1765 | 1769 | 1773 | 1777 | 1781 | 1785 | 1789 | 1793 | 1797 | 1801 | 1805 | 1809 | 1813 | 1817 | 1821 | 1825 | 1829 | 1833 | 1837 | 1841 | 1845 | 1849 | 1853 | 1857 | 1861 | 1865 | 1869 | 1873 | 1877 | 1881 | 1885 | 1889 | 1893 | 1897 | 1901 | 1905 | 1909 | 1913 | 1917 | 1921 | 1925 | 1929 | 1933 | 1937 | 1941 | 1945 | 1949 | 1953 | 1957 | 1961 | 1965 | 1969 | 1973 | 1977 | 1981 | 1985 | 1989 | 1993 | 1997 | 2001 | 2005 | 2009 | 2013 | 2017 | 2021 | 2025 | 2029 | 2033 | 2037 | 2041 | 2045 | 2049 | 2053 | 2057 | 2061 | 2065 | 2069 | 2073 | 2077 | 2081 | 2085 | 2089 | 2093 | 2097 | 2101 | 2105 | 2109 | 2113 | 2117 | 2121 | 2125 | 2129 | 2133 | 2137 | 2141 | 2145 | 2149 | 2153 | 2157 | 2161 | 2165 | 2169 | 2173 | 2177 | 2181 | 2185 | 2189 | 2193 | 2197 | 2201 | 2205 | 2209 | 2213 | 2217 | 2221 | 2225 | 2229 | 2233 | 2237 | 2241 | 2245 | 2249 | 2253 | 2257 | 2261 | 2265 | 2269 | 2273 | 2277 | 2281 | 2285 | 2289 | 2293 | 2297 | 2301 | 2305 | 2309 | 2313 | 2317 | 2321 | 2325 | 2329 | 2333 | 2337 | 2341 | 2345 | 2349 | 2353 | 2357 | 2361 | 2365 | 2369 | 2373 | 2377 | 2381 | 2385 | 2389 | 2393 | 2397 | 2401 | 2405 | 2409 | 2413 | 2417 | 2421 | 2425 | 2429 | 2433 | 2437 | 2441 | 2445 | 2449 | 2453 | 2457 | 2461 | 2465 | 2469 | 2473 | 2477 | 2481 | 2485 | 2489 | 2493 | 2497 | 2501 | 2505 | 2509 | 2513 | 2517 | 2521 | 2525 | 2529 | 2533 | 2537 | 2541 | 2545 | 2549 | 2553 | 2557 | 2561 | 2565 | 2569 | 2573 | 2577 | 2581 | 2585 | 2589 | 2593 | 2597 | 2601 | 2605 | 2609 | 2613 | 2617 | 2621 | 2625 | 2629 | 2633 | 2637 | 2641 | 2645 | 2649 | 2653 | 2657 | 2661 | 2665 | 2669 | 2673 | 2677 | 2681 | 2685 | 2689 | 2693 | 2697 | 2701 | 2705 | 2709 | 2713 | 2717 | 2721 | 2725 | 2729 | 2733 | 2737 | 2741 | 2745 | 2749 | 2753 | 2757 | 2761 | 2765 | 2769 | 2773 | 2777 | 2781 | 2785 | 2789 | 2793 | 2797 | 2801 | 2805 | 2809 | 2813 | 2817 | 2821 | 2825 | 2829 | 2833 | 2837 | 2841 | 2845 | 2849 | 2853 | 2857 | 2861 | 2865 | 2869 | 2873 | 2877 | 2881 | 2885 | 2889 | 2893 | 2897 | 2901 | 2905 | 2909 | 2913 | 2917 | 2921 | 2925 | 2929 | 2933 | 2937 | 2941 | 2945 | 2949 | 2953 | 2957 | 2961 | 2965 | 2969 | 2973 | 2977 | 2981 | 2985 | 2989 | 2993 | 2997 | 3001 | 3005 | 3009 | 3013 | 3017 | 3021 | 3025 | 3029 | 3033 | 3037 | 3041 | 3045 | 3049 | 3053 | 3057 | 3061 | 3065 | 3069 | 3073 | 3077 | 3081 | 3085 | 3089 | 3093 | 3097 | 3101 | 3105 | 3109 | 3113 | 3117 | 3121 | 3125 | 3129 | 3133 | 3137 | 3141 | 3145 | 3149 | 3153 | 3157 | 3161 | 3165 | 3169 | 3173 | 3177 | 3181 | 3185 | 3189 | 3193 | 3197 | 3201 | 3205 | 3209 | 3213 | 3217 | 3221 | 3225 | 3229 | 3233 | 3237 | 3241 | 3245 | 3249 | 3253 | 3257 | 3261 | 3265 | 3269 | 3273 | 3277 | 3281 | 3285 | 3289 | 3293 | 3297 | 3301 | 3305 | 3309 | 3313 | 3317 | 3321 | 3325 | 3329 | 3333 | 3337 | 3341 | 3345 | 3349 | 3353 | 3357 | 3361 | 3365 | 3369 | 3373 | 3377 | 3381 | 3385 | 3389 | 3393 | 3397 | 3401 | 3405 | 3409 | 3413 | 3417 | 3421 | 3425 | 3429 | 3433 | 3437 | 3441 | 3445 | 3449 | 3453 | 3457 | 3461 | 3465 | 3469 | 3473 | 3477 | 3481 | 3485 | 3489 | 3493 | 3497 | 3501 | 3505 | 3509 | 3513 | 3517 | 3521 | 3525 | 3529 | 3533 | 3537 | 3541 | 3545 | 3549 | 3553 | 3557 | 3561 | 3565 | 3569 | 3573 | 3577 | 3581 | 3585 | 3589 | 3593 | 3597 | 3601 | 3605 | 3609 | 3613 | 3617 | 3621 | 3625 | 3629 | 3633 | 3637 | 3641 | 3645 | 3649 | 3653 | 3657 | 3661 | 3665 | 3669 | 3673 | 3677 | 3681 | 3685 | 3689 | 3693 | 3697 | 3701 | 3705 | 3709 | 3713 | 3717 | 3721 | 3725 | 3729 | 3733 | 3737 | 3741 | 3745 | 3749 | 3753 | 3757 | 3761 | 3765 | 3769 | 3773 | 3777 | 3781 | 3785 | 3789 | 3793 | 3797 | 3801 | 3805 | 3809 | 3813 | 3817 | 3821 | 3825 | 3829 | 3833 | 3837 | 3841 | 3845 | 3849 | 3853 | 3857 | 3861 | 3865 | 3869 | 3873 | 3877 | 3881 | 3885 | 3889 | 3893 | 3897 | 3901 | 3905 | 3909 | 3913 | 3917 | 3921 | 3925 | 3929 | 3933 | 3937 | 3941 | 3945 | 3949 | 3953 | 3957 | 3961 | 3965 | 3969 | 3973 | 3977 | 3981 | 3985 | 3989 | 3993 | 3997 | 4001 | 4005 | 4009 | 4013 | 4017 | 4021 | 4025 | 4029 | 4033 | 4037 | 4041 | 4045 | 4049 | 4053 | 4057 | 4061 | 4065 | 4069 | 4073 | 4077 | 4081 | 4085 | 4089 | 4093 | 4097 | 4101 | 4105 | 4109 | 4113 | 4117 | 4121 | 4125 | 4129 | 4133 | 4137 | 4141 | 4145 | 4149 | 4153 | 4157 | 4161 | 4165 | 4169 | 4173 | 4177 | 4181 | 4185 | 4189 | 4193 | 4197 | 4201 | 4205 | 4209 | 4213 | 4217 | 4221 | 4225 | 4229 | 4233 | 4237 | 4241 | 4245 | 4249 | 4253 | 4257 | 4261 | 4265 | 4269 | 4273 | 4277 | 4281 | 4285 | 4289 | 4293 | 4297 | 4301 | 4305 | 4309 | 4313 | 4317 | 4321 | 4325 | 4329 | 4333 | 4337 | 4341 | 4345 | 4349 | 4353 | 4357 | 4361 | 4365 | 4369 | 4373 | 4377 | 4381 | 4385 | 4389 | 4393 | 4397 | 4401 | 4405 | 4409 | 4413 | 4417 | 4421 | 4425 | 4429 | 4433 | 4437 | 4441 | 4445 | 4449 | 4453 | 4457 | 4461 | 4465 | 4469 | 4473 | 4477 | 4481 | 4485 | 4489 | 4493 | 4497 | 4501 | 4505 | 4509 | 4513 | 4517 | 4521 | 4525 | 4529 | 4533 | 4537 | 4541 | 4545 | 4549 | 4553 | 4557 | 4561 | 4565 | 4569 | 4573 | 4577 | 4581 | 4585 | 4589 | 4593 | 4597 | 4601 | 4605 | 4609 | 4613 | 4617 | 4621 | 4625 | 4629 | 4633 | 4637 | 4641 | 4645 | 4649 | 4653 | 4657 | 4661 | 4665 | 4669 | 4673 | 4677 | 4681 | 4685 | 4689 | 4693 | 4697 | 4701 | 4705 | 4709 | 4713 | 4717 | 4721 | 4725 | 4729 | 4733 | 4737 | 4741 | 4745 | 4749 | 4753 | 4757 | 4761 | 4765 | 4769 | 4773 | 4777 | 4781 | 4785 | 4789 | 4793 | 4797 | 4801 | 4805 | 4809 | 4813 | 4817 | 4821 | 4825 | 4829 | 4833 | 4837 | 4841 | 4845 | 4849 | 4853 | 4857 | 4861 | 4865 | 4869 | 4873 | 4877 | 4881 | 4885 | 4889 | 4893 | 4897 | 4901 | 4905 | 4909 | 4913 | 4917 | 4921 | 4925 | 4929 | 4933 | 4937 | 4941 | 4945 | 4949 | 4953 | 4957 | 4961 | 4965 | 4969 | 4973 | 4977 | 4981 | 4985 | 4989 | 4993 | 4997 | 5001 | 5005 | 5009 | 5013 | 5017 | 5021 | 5025 | 5029 | 5033 | 5037 | 5041 | 5045 | 5049 | 5053 | 5057 | 5061 | 5065 | 5069 | 5073 | 5077 | 5081 | 5085 | 5089 | 5093 | 5097 | 5101 | 5105 | 5109 | 5113 | 5117 | 5121 | 5125 | 5129 | 5133 | 5137 | 5141 | 5145 | 5149 | 5153 | 5157 | 5161 | 5165 | 5169 | 5173 | 5177 | 5181 | 5185 | 5189 | 5193 | 5197 | 5201 | 5205 | 5209 | 5213 | 5217 | 5221 | 5225 | 5229 | 5233 | 5237 | 5241 | 5245 | 5249 | 5253 | 5257 | 5261 | 5265 | 5269 | 5273 | 5277 | 5281 | 5285 | 5289 | 5293 | 5297 | 5301 | 5305 | 5309 | 5313 | 5317 | 5321 | 5325 | 5329 | 5333 | 5337 | 5341 | 5345 | 5349 | 5353 | 5357 | 5361 | 5365 | 5369 | 5373 | 5377 | 5381 | 5385 | 5389 | 5393 | 5397 | 5401 | 5405 | 5409 | 5413 | 5417 | 5421 | 5425 | 5429 | 5433 | 5437 | 5441 | 5445 | 5449 | 5453 | 5457 | 5461 | 5465 | 5469 | 5473 | 5477 | 5481 | 5485 | 5489 | 5493 | 5497 | 5501 | 5505 | 5509 | 5513 | 5517 | 5521 | 5525 | 5529 | 5533 | 5537 | 5541 | 5545 | 5549 | 5553 | 5557 | 5561 | 5565 | 5569 | 5573 | 5577 | 5581 | 5585 | 5589 | 5593 | 5597 | 5601 | 5605 | 5609 | 561 |
|------|----|----|----|----|----|----|----|----|----|----|----|----|----|----|----|----|----|----|----|----|----|----|----|-----|-----|-----|-----|-----|-----|-----|-----|-----|-----|-----|-----|-----|-----|-----|-----|-----|-----|-----|-----|-----|-----|-----|-----|-----|-----|-----|-----|-----|-----|-----|-----|-----|-----|-----|-----|-----|-----|-----|-----|-----|-----|-----|-----|-----|-----|-----|-----|-----|-----|-----|-----|-----|-----|-----|-----|-----|-----|-----|-----|-----|-----|-----|-----|-----|-----|-----|-----|-----|-----|-----|-----|-----|-----|-----|-----|-----|-----|-----|-----|-----|-----|-----|-----|-----|-----|-----|-----|-----|-----|-----|-----|-----|-----|-----|-----|-----|-----|-----|-----|-----|-----|-----|-----|-----|-----|-----|-----|-----|-----|-----|-----|-----|-----|-----|-----|-----|-----|-----|-----|-----|-----|-----|-----|-----|-----|-----|-----|-----|-----|-----|-----|-----|-----|-----|-----|-----|-----|-----|-----|-----|-----|-----|-----|-----|-----|-----|-----|-----|-----|-----|-----|-----|-----|-----|-----|-----|-----|-----|-----|-----|-----|-----|-----|-----|-----|-----|-----|-----|-----|-----|-----|-----|-----|-----|-----|-----|-----|-----|-----|-----|-----|-----|-----|-----|-----|-----|-----|-----|-----|-----|-----|-----|-----|-----|-----|-----|-----|-----|-----|-----|-----|-----|-----|-----|-----|-----|-----|-----|-----|-----|-----|-----|-----|-----|-----|-----|-----|-----|-----|-----|-----|-----|-----|-----|------|------|------|------|------|------|------|------|------|------|------|------|------|------|------|------|------|------|------|------|------|------|------|------|------|------|------|------|------|------|------|------|------|------|------|------|------|------|------|------|------|------|------|------|------|------|------|------|------|------|------|------|------|------|------|------|------|------|------|------|------|------|------|------|------|------|------|------|------|------|------|------|------|------|------|------|------|------|------|------|------|------|------|------|------|------|------|------|------|------|------|------|------|------|------|------|------|------|------|------|------|------|------|------|------|------|------|------|------|------|------|------|------|------|------|------|------|------|------|------|------|------|------|------|------|------|------|------|------|------|------|------|------|------|------|------|------|------|------|------|------|------|------|------|------|------|------|------|------|------|------|------|------|------|------|------|------|------|------|------|------|------|------|------|------|------|------|------|------|------|------|------|------|------|------|------|------|------|------|------|------|------|------|------|------|------|------|------|------|------|------|------|------|------|------|------|------|------|------|------|------|------|------|------|------|------|------|------|------|------|------|------|------|------|------|------|------|------|------|------|------|------|------|------|------|------|------|------|------|------|------|------|------|------|------|------|------|------|------|------|------|------|------|------|------|------|------|------|------|------|------|------|------|------|------|------|------|------|------|------|------|------|------|------|------|------|------|------|------|------|------|------|------|------|------|------|------|------|------|------|------|------|------|------|------|------|------|------|------|------|------|------|------|------|------|------|------|------|------|------|------|------|------|------|------|------|------|------|------|------|------|------|------|------|------|------|------|------|------|------|------|------|------|------|------|------|------|------|------|------|------|------|------|------|------|------|------|------|------|------|------|------|------|------|------|------|------|------|------|------|------|------|------|------|------|------|------|------|------|------|------|------|------|------|------|------|------|------|------|------|------|------|------|------|------|------|------|------|------|------|------|------|------|------|------|------|------|------|------|------|------|------|------|------|------|------|------|------|------|------|------|------|------|------|------|------|------|------|------|------|------|------|------|------|------|------|------|------|------|------|------|------|------|------|------|------|------|------|------|------|------|------|------|------|------|------|------|------|------|------|------|------|------|------|------|------|------|------|------|------|------|------|------|------|------|------|------|------|------|------|------|------|------|------|------|------|------|------|------|------|------|------|------|------|------|------|------|------|------|------|------|------|------|------|------|------|------|------|------|------|------|------|------|------|------|------|------|------|------|------|------|------|------|------|------|------|------|------|------|------|------|------|------|------|------|------|------|------|------|------|------|------|------|------|------|------|------|------|------|------|------|------|------|------|------|------|------|------|------|------|------|------|------|------|------|------|------|------|------|------|------|------|------|------|------|------|------|------|------|------|------|------|------|------|------|------|------|------|------|------|------|------|------|------|------|------|------|------|------|------|------|------|------|------|------|------|------|------|------|------|------|------|------|------|------|------|------|------|------|------|------|------|------|------|------|------|------|------|------|------|------|------|------|------|------|------|------|------|------|------|------|------|------|------|------|------|------|------|------|------|------|------|------|------|------|------|------|------|------|------|------|------|------|------|------|------|------|------|------|------|------|------|------|------|------|------|------|------|------|------|------|------|------|------|------|------|------|------|------|------|------|------|------|------|------|------|------|------|------|------|------|------|------|------|------|------|------|------|------|------|------|------|------|------|------|------|------|------|------|------|------|------|------|------|------|------|------|------|------|------|------|------|------|------|------|------|------|------|------|------|------|------|------|------|------|------|------|------|------|------|------|------|------|------|------|------|------|------|------|------|------|------|------|------|------|------|------|------|------|------|------|------|------|------|------|------|------|------|------|------|------|------|------|------|------|------|------|------|------|------|------|------|------|------|------|------|------|------|------|------|------|------|------|------|------|------|------|------|------|------|------|------|------|------|------|------|------|------|------|------|------|------|------|------|------|------|------|------|------|------|------|------|------|------|------|------|------|------|------|------|------|------|------|------|------|------|------|------|------|------|------|------|------|------|------|------|------|------|------|------|------|------|------|------|------|------|------|------|------|------|------|------|------|------|------|------|------|------|------|------|------|------|------|------|------|------|------|------|------|------|------|------|------|------|------|------|------|------|------|------|------|------|------|------|------|------|------|------|------|------|------|------|------|------|------|------|------|------|------|------|------|------|------|------|------|------|------|------|------|------|------|------|------|------|------|------|------|------|------|------|------|------|------|------|------|------|------|------|------|------|------|------|------|------|------|------|------|------|------|------|------|------|------|------|------|------|------|------|------|------|------|------|------|------|------|------|------|------|------|------|------|------|------|------|------|------|------|------|------|------|------|------|------|------|------|------|------|------|------|------|------|------|------|------|------|------|------|------|------|------|------|------|------|------|------|------|------|------|------|------|------|------|------|------|------|------|------|------|------|------|------|------|------|------|------|------|------|------|------|------|------|------|------|------|------|------|------|------|------|------|------|------|------|------|------|------|------|------|------|------|------|------|------|------|------|------|------|------|------|------|------|------|------|------|------|------|------|------|------|------|------|------|------|------|------|------|------|------|------|------|------|------|------|------|------|------|------|------|------|------|------|------|------|------|------|------|------|------|------|------|------|------|------|------|------|------|------|------|------|------|------|------|------|------|------|------|------|------|------|------|------|------|------|------|------|------|------|------|------|------|------|------|------|------|------|------|------|------|------|------|------|------|------|------|------|------|------|------|------|------|------|------|------|------|------|------|------|------|------|------|------|------|------|-----|





|       |      |      |      |      |      |      |      |      |      |      |      |      |      |      |      |      |      |      |      |      |      |      |      |      |      |      |      |      |      |      |      |      |      |      |       |       |       |       |       |       |       |       |       |       |       |       |       |       |       |       |       |       |       |       |       |       |       |       |       |       |       |       |       |       |       |       |       |       |       |       |       |       |       |       |       |       |       |       |       |       |       |       |       |       |       |       |       |       |       |       |       |       |       |       |       |       |       |       |       |       |       |       |       |       |       |       |       |       |       |       |       |       |       |       |       |       |       |       |       |       |       |       |       |       |       |       |       |       |       |       |       |       |       |       |       |       |       |       |       |       |       |       |       |       |       |       |       |       |       |       |       |       |       |       |       |       |       |       |       |       |       |       |       |       |       |       |       |       |       |       |       |       |       |       |       |       |       |       |       |       |       |       |       |       |       |       |       |       |       |       |       |       |       |       |       |       |       |       |       |       |       |       |       |       |       |       |       |       |       |       |       |       |       |       |       |       |       |       |       |       |       |       |       |       |       |       |       |       |       |       |       |       |       |       |       |       |       |       |       |       |       |       |       |       |       |       |       |       |       |       |       |       |       |       |       |       |       |       |       |       |       |       |       |       |       |       |       |       |       |       |       |       |       |       |       |       |       |       |       |       |       |       |       |       |       |       |       |       |       |       |       |       |       |       |       |       |       |       |       |       |       |       |       |       |       |       |       |       |       |       |       |       |       |       |       |       |       |       |       |       |       |       |       |       |       |       |       |       |       |       |       |       |       |       |       |       |       |       |       |       |       |       |       |       |       |       |       |       |       |       |       |       |       |       |       |       |       |       |       |       |       |       |       |       |       |       |       |       |       |       |       |       |       |       |       |       |       |       |       |       |       |        |        |        |        |        |        |        |        |        |        |        |        |        |        |        |        |        |        |        |        |        |        |        |        |        |        |        |        |        |        |        |        |        |        |        |        |        |        |        |        |        |        |        |        |        |        |        |        |        |        |        |        |        |        |        |        |        |        |        |        |        |        |        |        |        |        |        |        |        |        |        |        |        |        |        |        |        |        |        |        |        |        |        |        |        |        |        |        |        |        |        |        |        |        |        |        |        |        |        |        |        |        |        |        |        |        |        |        |        |        |        |        |        |        |        |        |        |        |        |        |        |        |        |        |        |        |        |        |        |        |        |        |        |        |        |        |        |        |        |        |        |        |        |        |        |        |        |        |        |        |        |        |        |        |        |        |        |        |        |        |        |        |        |        |        |        |        |        |        |        |        |        |        |        |        |        |        |        |        |        |        |        |        |        |        |        |        |        |        |        |        |        |        |        |        |        |        |        |        |        |        |        |        |        |        |        |        |        |        |        |        |        |        |        |        |        |        |        |        |        |        |        |        |        |        |        |        |        |        |        |        |        |        |        |        |        |        |        |        |        |        |        |        |        |        |        |        |        |        |        |        |        |        |        |        |        |        |        |        |        |        |        |        |        |        |        |        |        |        |        |        |        |        |        |        |        |        |        |        |        |        |        |        |        |        |        |        |        |        |        |        |        |        |        |        |        |        |        |        |        |        |        |        |        |        |        |        |        |        |        |        |        |        |        |        |        |        |        |        |        |        |        |        |        |        |        |        |        |        |        |        |        |        |        |        |        |        |        |        |        |        |        |        |        |        |        |        |        |        |        |        |        |        |        |        |        |        |        |        |        |        |        |        |        |        |        |        |        |        |        |        |        |        |        |        |        |        |        |        |        |        |        |        |        |        |        |        |        |        |        |        |        |        |        |        |        |        |        |        |        |        |        |        |        |        |        |        |        |        |        |        |        |        |        |        |        |        |        |        |        |        |        |        |        |        |        |        |        |        |        |        |        |        |        |        |        |        |        |        |        |        |        |        |        |        |        |        |        |        |        |        |        |        |        |        |        |        |        |        |        |        |        |        |        |        |        |        |        |        |        |        |        |        |        |        |        |        |        |        |        |        |        |        |        |        |        |        |        |        |        |        |        |        |        |        |        |        |        |        |        |        |        |        |        |        |        |        |        |        |        |        |        |        |        |        |        |        |        |        |        |        |        |        |        |        |        |        |        |        |        |        |        |        |        |        |        |        |        |        |        |        |        |        |        |        |        |        |        |        |        |        |        |        |        |        |        |        |        |        |        |        |        |        |        |        |        |        |        |        |        |        |        |        |        |        |        |        |        |        |        |        |        |        |        |        |        |        |        |        |        |        |        |        |        |        |        |        |        |        |        |        |        |        |        |        |        |        |        |        |        |        |        |        |        |        |        |        |        |        |        |        |        |        |        |        |        |        |        |        |        |        |        |        |        |        |        |        |        |        |        |        |        |        |        |        |        |        |        |        |        |        |        |        |        |        |        |        |        |        |        |        |        |        |        |        |        |        |        |        |        |        |        |        |        |        |        |        |        |        |        |        |        |        |        |        |        |        |        |        |        |        |        |        |        |        |        |        |        |        |        |        |        |        |        |        |        |        |        |        |        |        |        |        |        |        |        |        |        |        |        |        |        |        |        |        |        |        |        |        |        |        |        |        |        |        |        |        |        |        |        |        |        |        |        |        |        |        |        |        |        |        |        |        |        |        |        |        |        |        |        |        |        |        |        |        |        |        |        |        |        |        |        |        |        |        |        |        |        |          |
|-------|------|------|------|------|------|------|------|------|------|------|------|------|------|------|------|------|------|------|------|------|------|------|------|------|------|------|------|------|------|------|------|------|------|------|-------|-------|-------|-------|-------|-------|-------|-------|-------|-------|-------|-------|-------|-------|-------|-------|-------|-------|-------|-------|-------|-------|-------|-------|-------|-------|-------|-------|-------|-------|-------|-------|-------|-------|-------|-------|-------|-------|-------|-------|-------|-------|-------|-------|-------|-------|-------|-------|-------|-------|-------|-------|-------|-------|-------|-------|-------|-------|-------|-------|-------|-------|-------|-------|-------|-------|-------|-------|-------|-------|-------|-------|-------|-------|-------|-------|-------|-------|-------|-------|-------|-------|-------|-------|-------|-------|-------|-------|-------|-------|-------|-------|-------|-------|-------|-------|-------|-------|-------|-------|-------|-------|-------|-------|-------|-------|-------|-------|-------|-------|-------|-------|-------|-------|-------|-------|-------|-------|-------|-------|-------|-------|-------|-------|-------|-------|-------|-------|-------|-------|-------|-------|-------|-------|-------|-------|-------|-------|-------|-------|-------|-------|-------|-------|-------|-------|-------|-------|-------|-------|-------|-------|-------|-------|-------|-------|-------|-------|-------|-------|-------|-------|-------|-------|-------|-------|-------|-------|-------|-------|-------|-------|-------|-------|-------|-------|-------|-------|-------|-------|-------|-------|-------|-------|-------|-------|-------|-------|-------|-------|-------|-------|-------|-------|-------|-------|-------|-------|-------|-------|-------|-------|-------|-------|-------|-------|-------|-------|-------|-------|-------|-------|-------|-------|-------|-------|-------|-------|-------|-------|-------|-------|-------|-------|-------|-------|-------|-------|-------|-------|-------|-------|-------|-------|-------|-------|-------|-------|-------|-------|-------|-------|-------|-------|-------|-------|-------|-------|-------|-------|-------|-------|-------|-------|-------|-------|-------|-------|-------|-------|-------|-------|-------|-------|-------|-------|-------|-------|-------|-------|-------|-------|-------|-------|-------|-------|-------|-------|-------|-------|-------|-------|-------|-------|-------|-------|-------|-------|-------|-------|-------|-------|-------|-------|-------|-------|-------|-------|-------|-------|-------|-------|-------|-------|-------|-------|-------|-------|-------|-------|-------|-------|-------|-------|-------|-------|-------|-------|-------|-------|-------|-------|-------|-------|-------|-------|-------|-------|-------|-------|-------|-------|-------|-------|-------|-------|-------|-------|-------|-------|-------|-------|-------|-------|-------|-------|-------|--------|--------|--------|--------|--------|--------|--------|--------|--------|--------|--------|--------|--------|--------|--------|--------|--------|--------|--------|--------|--------|--------|--------|--------|--------|--------|--------|--------|--------|--------|--------|--------|--------|--------|--------|--------|--------|--------|--------|--------|--------|--------|--------|--------|--------|--------|--------|--------|--------|--------|--------|--------|--------|--------|--------|--------|--------|--------|--------|--------|--------|--------|--------|--------|--------|--------|--------|--------|--------|--------|--------|--------|--------|--------|--------|--------|--------|--------|--------|--------|--------|--------|--------|--------|--------|--------|--------|--------|--------|--------|--------|--------|--------|--------|--------|--------|--------|--------|--------|--------|--------|--------|--------|--------|--------|--------|--------|--------|--------|--------|--------|--------|--------|--------|--------|--------|--------|--------|--------|--------|--------|--------|--------|--------|--------|--------|--------|--------|--------|--------|--------|--------|--------|--------|--------|--------|--------|--------|--------|--------|--------|--------|--------|--------|--------|--------|--------|--------|--------|--------|--------|--------|--------|--------|--------|--------|--------|--------|--------|--------|--------|--------|--------|--------|--------|--------|--------|--------|--------|--------|--------|--------|--------|--------|--------|--------|--------|--------|--------|--------|--------|--------|--------|--------|--------|--------|--------|--------|--------|--------|--------|--------|--------|--------|--------|--------|--------|--------|--------|--------|--------|--------|--------|--------|--------|--------|--------|--------|--------|--------|--------|--------|--------|--------|--------|--------|--------|--------|--------|--------|--------|--------|--------|--------|--------|--------|--------|--------|--------|--------|--------|--------|--------|--------|--------|--------|--------|--------|--------|--------|--------|--------|--------|--------|--------|--------|--------|--------|--------|--------|--------|--------|--------|--------|--------|--------|--------|--------|--------|--------|--------|--------|--------|--------|--------|--------|--------|--------|--------|--------|--------|--------|--------|--------|--------|--------|--------|--------|--------|--------|--------|--------|--------|--------|--------|--------|--------|--------|--------|--------|--------|--------|--------|--------|--------|--------|--------|--------|--------|--------|--------|--------|--------|--------|--------|--------|--------|--------|--------|--------|--------|--------|--------|--------|--------|--------|--------|--------|--------|--------|--------|--------|--------|--------|--------|--------|--------|--------|--------|--------|--------|--------|--------|--------|--------|--------|--------|--------|--------|--------|--------|--------|--------|--------|--------|--------|--------|--------|--------|--------|--------|--------|--------|--------|--------|--------|--------|--------|--------|--------|--------|--------|--------|--------|--------|--------|--------|--------|--------|--------|--------|--------|--------|--------|--------|--------|--------|--------|--------|--------|--------|--------|--------|--------|--------|--------|--------|--------|--------|--------|--------|--------|--------|--------|--------|--------|--------|--------|--------|--------|--------|--------|--------|--------|--------|--------|--------|--------|--------|--------|--------|--------|--------|--------|--------|--------|--------|--------|--------|--------|--------|--------|--------|--------|--------|--------|--------|--------|--------|--------|--------|--------|--------|--------|--------|--------|--------|--------|--------|--------|--------|--------|--------|--------|--------|--------|--------|--------|--------|--------|--------|--------|--------|--------|--------|--------|--------|--------|--------|--------|--------|--------|--------|--------|--------|--------|--------|--------|--------|--------|--------|--------|--------|--------|--------|--------|--------|--------|--------|--------|--------|--------|--------|--------|--------|--------|--------|--------|--------|--------|--------|--------|--------|--------|--------|--------|--------|--------|--------|--------|--------|--------|--------|--------|--------|--------|--------|--------|--------|--------|--------|--------|--------|--------|--------|--------|--------|--------|--------|--------|--------|--------|--------|--------|--------|--------|--------|--------|--------|--------|--------|--------|--------|--------|--------|--------|--------|--------|--------|--------|--------|--------|--------|--------|--------|--------|--------|--------|--------|--------|--------|--------|--------|--------|--------|--------|--------|--------|--------|--------|--------|--------|--------|--------|--------|--------|--------|--------|--------|--------|--------|--------|--------|--------|--------|--------|--------|--------|--------|--------|--------|--------|--------|--------|--------|--------|--------|--------|--------|--------|--------|--------|--------|--------|--------|--------|--------|--------|--------|--------|--------|--------|--------|--------|--------|--------|--------|--------|--------|--------|--------|--------|--------|--------|--------|--------|--------|--------|--------|--------|--------|--------|--------|--------|--------|--------|--------|--------|--------|--------|--------|--------|--------|--------|--------|--------|--------|--------|--------|--------|--------|--------|--------|--------|--------|--------|--------|--------|--------|--------|--------|--------|--------|--------|--------|--------|--------|--------|--------|--------|--------|--------|--------|--------|--------|--------|--------|--------|--------|--------|--------|--------|--------|--------|--------|--------|--------|--------|--------|--------|--------|--------|--------|--------|--------|--------|--------|--------|--------|--------|--------|--------|--------|--------|--------|--------|--------|--------|--------|--------|--------|--------|--------|--------|--------|--------|--------|--------|--------|--------|--------|--------|--------|--------|--------|--------|--------|--------|--------|--------|--------|--------|--------|--------|--------|--------|--------|--------|--------|--------|--------|--------|--------|--------|--------|--------|--------|--------|--------|--------|--------|--------|--------|--------|--------|--------|--------|--------|--------|--------|--------|--------|--------|--------|--------|--------|--------|--------|--------|--------|--------|--------|--------|--------|--------|--------|--------|--------|--------|--------|--------|--------|--------|--------|--------|--------|--------|--------|----------|
| CDG1A | 1.02 | 1.21 | 1.42 | 1.61 | 1.79 | 2.01 | 2.23 | 2.49 | 2.79 | 3.08 | 3.39 | 3.70 | 4.01 | 4.31 | 4.61 | 4.90 | 5.18 | 5.46 | 5.74 | 6.02 | 6.29 | 6.56 | 6.83 | 7.09 | 7.36 | 7.63 | 7.89 | 8.16 | 8.42 | 8.68 | 8.94 | 9.20 | 9.46 | 9.72 | 10.00 | 10.26 | 10.52 | 10.78 | 11.04 | 11.31 | 11.57 | 11.83 | 12.10 | 12.36 | 12.62 | 12.88 | 13.14 | 13.40 | 13.66 | 13.92 | 14.18 | 14.44 | 14.70 | 14.96 | 15.22 | 15.48 | 15.74 | 16.00 | 16.26 | 16.52 | 16.78 | 17.04 | 17.30 | 17.56 | 17.82 | 18.08 | 18.34 | 18.60 | 18.86 | 19.12 | 19.38 | 19.64 | 19.90 | 20.16 | 20.42 | 20.68 | 20.94 | 21.20 | 21.46 | 21.72 | 21.98 | 22.24 | 22.50 | 22.76 | 23.02 | 23.28 | 23.54 | 23.80 | 24.06 | 24.32 | 24.58 | 24.84 | 25.10 | 25.36 | 25.62 | 25.88 | 26.14 | 26.40 | 26.66 | 26.92 | 27.18 | 27.44 | 27.70 | 27.96 | 28.22 | 28.48 | 28.74 | 29.00 | 29.26 | 29.52 | 29.78 | 30.04 | 30.30 | 30.56 | 30.82 | 31.08 | 31.34 | 31.60 | 31.86 | 32.12 | 32.38 | 32.64 | 32.90 | 33.16 | 33.42 | 33.68 | 33.94 | 34.20 | 34.46 | 34.72 | 34.98 | 35.24 | 35.50 | 35.76 | 36.02 | 36.28 | 36.54 | 36.80 | 37.06 | 37.32 | 37.58 | 37.84 | 38.10 | 38.36 | 38.62 | 38.88 | 39.14 | 39.40 | 39.66 | 39.92 | 40.18 | 40.44 | 40.70 | 40.96 | 41.22 | 41.48 | 41.74 | 42.00 | 42.26 | 42.52 | 42.78 | 43.04 | 43.30 | 43.56 | 43.82 | 44.08 | 44.34 | 44.60 | 44.86 | 45.12 | 45.38 | 45.64 | 45.90 | 46.16 | 46.42 | 46.68 | 46.94 | 47.20 | 47.46 | 47.72 | 47.98 | 48.24 | 48.50 | 48.76 | 49.02 | 49.28 | 49.54 | 49.80 | 50.06 | 50.32 | 50.58 | 50.84 | 51.10 | 51.36 | 51.62 | 51.88 | 52.14 | 52.40 | 52.66 | 52.92 | 53.18 | 53.44 | 53.70 | 53.96 | 54.22 | 54.48 | 54.74 | 55.00 | 55.26 | 55.52 | 55.78 | 56.04 | 56.30 | 56.56 | 56.82 | 57.08 | 57.34 | 57.60 | 57.86 | 58.12 | 58.38 | 58.64 | 58.90 | 59.16 | 59.42 | 59.68 | 59.94 | 60.20 | 60.46 | 60.72 | 60.98 | 61.24 | 61.50 | 61.76 | 62.02 | 62.28 | 62.54 | 62.80 | 63.06 | 63.32 | 63.58 | 63.84 | 64.10 | 64.36 | 64.62 | 64.88 | 65.14 | 65.40 | 65.66 | 65.92 | 66.18 | 66.44 | 66.70 | 66.96 | 67.22 | 67.48 | 67.74 | 68.00 | 68.26 | 68.52 | 68.78 | 69.04 | 69.30 | 69.56 | 69.82 | 70.08 | 70.34 | 70.60 | 70.86 | 71.12 | 71.38 | 71.64 | 71.90 | 72.16 | 72.42 | 72.68 | 72.94 | 73.20 | 73.46 | 73.72 | 73.98 | 74.24 | 74.50 | 74.76 | 75.02 | 75.28 | 75.54 | 75.80 | 76.06 | 76.32 | 76.58 | 76.84 | 77.10 | 77.36 | 77.62 | 77.88 | 78.14 | 78.40 | 78.66 | 78.92 | 79.18 | 79.44 | 79.70 | 79.96 | 80.22 | 80.48 | 80.74 | 81.00 | 81.26 | 81.52 | 81.78 | 82.04 | 82.30 | 82.56 | 82.82 | 83.08 | 83.34 | 83.60 | 83.86 | 84.12 | 84.38 | 84.64 | 84.90 | 85.16 | 85.42 | 85.68 | 85.94 | 86.20 | 86.46 | 86.72 | 86.98 | 87.24 | 87.50 | 87.76 | 88.02 | 88.28 | 88.54 | 88.80 | 89.06 | 89.32 | 89.58 | 89.84 | 90.10 | 90.36 | 90.62 | 90.88 | 91.14 | 91.40 | 91.66 | 91.92 | 92.18 | 92.44 | 92.70 | 92.96 | 93.22 | 93.48 | 93.74 | 94.00 | 94.26 | 94.52 | 94.78 | 95.04 | 95.30 | 95.56 | 95.82 | 96.08 | 96.34 | 96.60 | 96.86 | 97.12 | 97.38 | 97.64 | 97.90 | 98.16 | 98.42 | 98.68 | 98.94 | 99.20 | 99.46 | 99.72 | 99.98 | 100.24 | 100.50 | 100.76 | 101.02 | 101.28 | 101.54 | 101.80 | 102.06 | 102.32 | 102.58 | 102.84 | 103.10 | 103.36 | 103.62 | 103.88 | 104.14 | 104.40 | 104.66 | 104.92 | 105.18 | 105.44 | 105.70 | 105.96 | 106.22 | 106.48 | 106.74 | 107.00 | 107.26 | 107.52 | 107.78 | 108.04 | 108.30 | 108.56 | 108.82 | 109.08 | 109.34 | 109.60 | 109.86 | 110.12 | 110.38 | 110.64 | 110.90 | 111.16 | 111.42 | 111.68 | 111.94 | 112.20 | 112.46 | 112.72 | 112.98 | 113.24 | 113.50 | 113.76 | 114.02 | 114.28 | 114.54 | 114.80 | 115.06 | 115.32 | 115.58 | 115.84 | 116.10 | 116.36 | 116.62 | 116.88 | 117.14 | 117.40 | 117.66 | 117.92 | 118.18 | 118.44 | 118.70 | 118.96 | 119.22 | 119.48 | 119.74 | 120.00 | 120.26 | 120.52 | 120.78 | 121.04 | 121.30 | 121.56 | 121.82 | 122.08 | 122.34 | 122.60 | 122.86 | 123.12 | 123.38 | 123.64 | 123.90 | 124.16 | 124.42 | 124.68 | 124.94 | 125.20 | 125.46 | 125.72 | 125.98 | 126.24 | 126.50 | 126.76 | 127.02 | 127.28 | 127.54 | 127.80 | 128.06 | 128.32 | 128.58 | 128.84 | 129.10 | 129.36 | 129.62 | 129.88 | 130.14 | 130.40 | 130.66 | 130.92 | 131.18 | 131.44 | 131.70 | 131.96 | 132.22 | 132.48 | 132.74 | 133.00 | 133.26 | 133.52 | 133.78 | 134.04 | 134.30 | 134.56 | 134.82 | 135.08 | 135.34 | 135.60 | 135.86 | 136.12 | 136.38 | 136.64 | 136.90 | 137.16 | 137.42 | 137.68 | 137.94 | 138.20 | 138.46 | 138.72 | 138.98 | 139.24 | 139.50 | 139.76 | 140.02 | 140.28 | 140.54 | 140.80 | 141.06 | 141.32 | 141.58 | 141.84 | 142.10 | 142.36 | 142.62 | 142.88 | 143.14 | 143.40 | 143.66 | 143.92 | 144.18 | 144.44 | 144.70 | 144.96 | 145.22 | 145.48 | 145.74 | 146.00 | 146.26 | 146.52 | 146.78 | 147.04 | 147.30 | 147.56 | 147.82 | 148.08 | 148.34 | 148.60 | 148.86 | 149.12 | 149.38 | 149.64 | 149.90 | 150.16 | 150.42 | 150.68 | 150.94 | 151.20 | 151.46 | 151.72 | 151.98 | 152.24 | 152.50 | 152.76 | 153.02 | 153.28 | 153.54 | 153.80 | 154.06 | 154.32 | 154.58 | 154.84 | 155.10 | 155.36 | 155.62 | 155.88 | 156.14 | 156.40 | 156.66 | 156.92 | 157.18 | 157.44 | 157.70 | 157.96 | 158.22 | 158.48 | 158.74 | 159.00 | 159.26 | 159.52 | 159.78 | 160.04 | 160.30 | 160.56 | 160.82 | 161.08 | 161.34 | 161.60 | 161.86 | 162.12 | 162.38 | 162.64 | 162.90 | 163.16 | 163.42 | 163.68 | 163.94 | 164.20 | 164.46 | 164.72 | 164.98 | 165.24 | 165.50 | 165.76 | 166.02 | 166.28 | 166.54 | 166.80 | 167.06 | 167.32 | 167.58 | 167.84 | 168.10 | 168.36 | 168.62 | 168.88 | 169.14 | 169.40 | 169.66 | 169.92 | 170.18 | 170.44 | 170.70 | 170.96 | 171.22 | 171.48 | 171.74 | 172.00 | 172.26 | 172.52 | 172.78 | 173.04 | 173.30 | 173.56 | 173.82 | 174.08 | 174.34 | 174.60 | 174.86 | 175.12 | 175.38 | 175.64 | 175.90 | 176.16 | 176.42 | 176.68 | 176.94 | 177.20 | 177.46 | 177.72 | 177.98 | 178.24 | 178.50 | 178.76 | 179.02 | 179.28 | 179.54 | 179.80 | 180.06 | 180.32 | 180.58 | 180.84 | 181.10 | 181.36 | 181.62 | 181.88 | 182.14 | 182.40 | 182.66 | 182.92 | 183.18 | 183.44 | 183.70 | 183.96 | 184.22 | 184.48 | 184.74 | 185.00 | 185.26 | 185.52 | 185.78 | 186.04 | 186.30 | 186.56 | 186.82 | 187.08 | 187.34 | 187.60 | 187.86 | 188.12 | 188.38 | 188.64 | 188.90 | 189.16 | 189.42 | 189.68 | 189.94 | 190.20 | 190.46 | 190.72 | 190.98 | 191.24 | 191.50 | 191.76 | 192.02 | 192.28 | 192.54 | 192.80 | 193.06 | 193.32 | 193.58 | 193.84 | 194.10 | 194.36 | 194.62 | 194.88 | 195.14 | 195.40 | 195.66 | 195.92 | 196.18 | 196.44 | 196.70 | 196.96 | 197.22 | 197.48 | 197.74 | 198.00 | 198.26 | 198.52 | 198.78 | 199.04 | 199.30 | 199.56 | 199.82 | 200.08 | 200.34 | 200.60 | 200.86 | 201.12 | 201.38 | 201.64 | 201.90 | 202.16 | 202.42 | 202.68 | 202.94 | 203.20 | 203.46 | 203.72 | 203.98 | 204.24 | 204.50 | 204.76 | 205.02 | 205.28 | 205.54 | 205.80 | 206.06 | 206.32 | 206.58 | 206.84 | 207.10 | 207.36 | 207.62 | 207.88 | 208.14 | 208.40 | 208.66 | 208.92 | 209.18 | 209.44 | 209.70 | 209.96 | 210.22 | 210.48 | 210.74 | 211.00 | 211.26 | 211.52 | 211.78 | 212.04 | 212.30 | 212.56 | 212.82 | 213.08 | 213.34 | 213.60 | 213.86 | 214.12 | 214.38 | 214.64 | 214.90 | 215.16 | 215.42 | 215.68 | 215.94 | 216.20 | 216.46 | 216.72 | 216.98 | 217.24 | 217.50 | 217.76 | 218.02 | 218.28 | 218.54 | 218.80 | 219.06 | 219.32 | 219.58 | 219.84 | 220.10 | 220.36 | 220.62 | 220.88 | 221.14 | 221.40 | 221.66 | 221.92 | 222.18 | 222.44 | 222.70 | 222.96 | 223.22 | 223.48 | 223.74 | 224.00 | 224.26 | 224.52 | 224.78 | 225.04 | 225.30 | 225.56 | 225.82 | 226.08 | 226.34 | 226.60 | 226.86 | 227.12 | 227.38 | 227.64 | 227.90 | 228.16 | 228.42 | 228.68 | 228.94 | 229.20 | 229.46 | 229.72 | 229.98 | 230.24 | 230.50 | 230.76 | 231.02 | 231.28 | 231.54 | 231.80 | 232.06 | 232.32 | 232.58 | 232.84 | 233.10 | 233.36 | 233.62 | 233.88 | 234.14 | 234.40 | 234.66 | 234.92 | 235.18 | 235.44 | 235.70 | 235.96 | 236.22 | 236.48 | 236.74 | 237.00 | 237.26 | 237.52 | 237.78 | 238.04 | 238.30 | 238.56 | 238.82 | 239.08 | 239.34 | 239.60 | 239.86 | 240.12 | 240.38 | 240.64 | 240.90 | 241.16 | 241.42 | 241.68 | 241.94 | 242.20 | 242.46 | 242.72 | 242.98 | 243.24 | 243.50 | 243.76 | 244.02 | 244.28 | 244.54 | 244.80 | 245.06 | 245.32 | 245.58 | 245.84 | 246.10 | 246.36 | 246.62 | 246.88 | 247.14 | 247.40 | 247.66 | 247.92 | 248.18 | 248.44 | 248.70 | 248.96 | 249.22 | 249.48 | 249.74 | 250.00 | 250.26 | 250.52 | 250.78 | 251.04 | 251.30 | 251.56 | 251.82 | 252.08 | 252.34 | 252.60 | 252.86 | 253.12 | 253.38 | 253.64 | 253.90 | 254.16 | 254.42 | 254.68 | 254.94 | 255.20 | 255.46 | 255.72 | 255.98 | 256.24 | 256.50 | 256.76 | 257.02 | 257.28 | 257.54 | 257.80 | 258.06 | 258.32 | 258.58 | 258.84 | 259.10 | 259.36 | 259.62 | 259.88 | 260.14 | 260.40 | 260.66 | 260.92 | 261.18 | 261.44 | 261.70 | 261.96 | 262.22 | 262.48 | 262.74 | 263.00 | 263.26 | 263.52 | 263.78 | 264.04 | 264.30 | 264.56 | 264.82 | 265.08 | 265.34 | 265.60 | 265.86 | 266.12 | 266.38 | 266.64 | 266.90 | 267.16 | 267.42 | 267.68 | 267.94 | 268.20 | 268.46 | 268.72 | 268.98 | 269.24 | 269.50 | 269.76 | 270.02 | 270.28 | 270.54 | 270.80 | 271.06 | 271.32 | 271.58 | 271.84 | 272.10 | 272.36 | 272.62 | 272.88 | 273.14 | 273.40 | 273.66 | 273.92 | 274.18 | 274.44 | 274.70 | 274.96 | 275.22 | 275.48 | 275.74 | 276.00 | 276.26 | 276.52 | 276.78 | 277.04 | 277.30 | 277.56 | 277.82 | 278.08 | 278.34 | 278.60 | 278.86 | 279.12 | 279.38 | 279.64 | 279.90 | 280.16 | 280.42 | 280.68 | 280.94 | 281.20 | 281.46 | 281.72 | 281.98 | 282.24 | 282.50 | 282.76 | 283.02 | 283.28 | 283.54 | 283.80 | 284.06 | 284.32 | 284.58 | 284.84 | 285.10 | 285.36 | 285.62 | 285.88 | 286.14 | 286.40 | 286.66 | 286.92 | 287.18 | 287.44 | 287.70 | 287.96 | 288.22 | 288.48 | 288.74 | 289.00 | 289.26 | 289.52 | 289.78 | 290.04 | 290.30 | 290.56 | 290.82 | 291.08 | 291.34 | 291.60 | 291.86 | 292.12 | 292.38 | 292.64 | 292.90 | 293.16 | 293.42 | 293.68 | 293.94 | 294.20 | 294.46 | 294.72 | 294.98 | 295.24 | 295.50 | 295.76 | 296.02 | 296.28 | 296.54 | 296.80 | 297.06 | 297.32 | 297.58 | 297.84 | 298.10 | 298.36 | 298.62 | 298.88 | 299.14 | 299.40 | 299.66 | 299.92 | 300.18 | 300.44 | 300.70 | 300.96 | 301.22 | 301.48 | 301.74 | 302.00 | 302.26 | 302.52</ |
|-------|------|------|------|------|------|------|------|------|------|------|------|------|------|------|------|------|------|------|------|------|------|------|------|------|------|------|------|------|------|------|------|------|------|------|-------|-------|-------|-------|-------|-------|-------|-------|-------|-------|-------|-------|-------|-------|-------|-------|-------|-------|-------|-------|-------|-------|-------|-------|-------|-------|-------|-------|-------|-------|-------|-------|-------|-------|-------|-------|-------|-------|-------|-------|-------|-------|-------|-------|-------|-------|-------|-------|-------|-------|-------|-------|-------|-------|-------|-------|-------|-------|-------|-------|-------|-------|-------|-------|-------|-------|-------|-------|-------|-------|-------|-------|-------|-------|-------|-------|-------|-------|-------|-------|-------|-------|-------|-------|-------|-------|-------|-------|-------|-------|-------|-------|-------|-------|-------|-------|-------|-------|-------|-------|-------|-------|-------|-------|-------|-------|-------|-------|-------|-------|-------|-------|-------|-------|-------|-------|-------|-------|-------|-------|-------|-------|-------|-------|-------|-------|-------|-------|-------|-------|-------|-------|-------|-------|-------|-------|-------|-------|-------|-------|-------|-------|-------|-------|-------|-------|-------|-------|-------|-------|-------|-------|-------|-------|-------|-------|-------|-------|-------|-------|-------|-------|-------|-------|-------|-------|-------|-------|-------|-------|-------|-------|-------|-------|-------|-------|-------|-------|-------|-------|-------|-------|-------|-------|-------|-------|-------|-------|-------|-------|-------|-------|-------|-------|-------|-------|-------|-------|-------|-------|-------|-------|-------|-------|-------|-------|-------|-------|-------|-------|-------|-------|-------|-------|-------|-------|-------|-------|-------|-------|-------|-------|-------|-------|-------|-------|-------|-------|-------|-------|-------|-------|-------|-------|-------|-------|-------|-------|-------|-------|-------|-------|-------|-------|-------|-------|-------|-------|-------|-------|-------|-------|-------|-------|-------|-------|-------|-------|-------|-------|-------|-------|-------|-------|-------|-------|-------|-------|-------|-------|-------|-------|-------|-------|-------|-------|-------|-------|-------|-------|-------|-------|-------|-------|-------|-------|-------|-------|-------|-------|-------|-------|-------|-------|-------|-------|-------|-------|-------|-------|-------|-------|-------|-------|-------|-------|-------|-------|-------|-------|-------|-------|-------|-------|-------|-------|-------|-------|-------|-------|-------|-------|-------|-------|-------|-------|-------|-------|-------|-------|-------|-------|-------|-------|-------|-------|-------|-------|-------|-------|-------|-------|-------|-------|-------|-------|-------|--------|--------|--------|--------|--------|--------|--------|--------|--------|--------|--------|--------|--------|--------|--------|--------|--------|--------|--------|--------|--------|--------|--------|--------|--------|--------|--------|--------|--------|--------|--------|--------|--------|--------|--------|--------|--------|--------|--------|--------|--------|--------|--------|--------|--------|--------|--------|--------|--------|--------|--------|--------|--------|--------|--------|--------|--------|--------|--------|--------|--------|--------|--------|--------|--------|--------|--------|--------|--------|--------|--------|--------|--------|--------|--------|--------|--------|--------|--------|--------|--------|--------|--------|--------|--------|--------|--------|--------|--------|--------|--------|--------|--------|--------|--------|--------|--------|--------|--------|--------|--------|--------|--------|--------|--------|--------|--------|--------|--------|--------|--------|--------|--------|--------|--------|--------|--------|--------|--------|--------|--------|--------|--------|--------|--------|--------|--------|--------|--------|--------|--------|--------|--------|--------|--------|--------|--------|--------|--------|--------|--------|--------|--------|--------|--------|--------|--------|--------|--------|--------|--------|--------|--------|--------|--------|--------|--------|--------|--------|--------|--------|--------|--------|--------|--------|--------|--------|--------|--------|--------|--------|--------|--------|--------|--------|--------|--------|--------|--------|--------|--------|--------|--------|--------|--------|--------|--------|--------|--------|--------|--------|--------|--------|--------|--------|--------|--------|--------|--------|--------|--------|--------|--------|--------|--------|--------|--------|--------|--------|--------|--------|--------|--------|--------|--------|--------|--------|--------|--------|--------|--------|--------|--------|--------|--------|--------|--------|--------|--------|--------|--------|--------|--------|--------|--------|--------|--------|--------|--------|--------|--------|--------|--------|--------|--------|--------|--------|--------|--------|--------|--------|--------|--------|--------|--------|--------|--------|--------|--------|--------|--------|--------|--------|--------|--------|--------|--------|--------|--------|--------|--------|--------|--------|--------|--------|--------|--------|--------|--------|--------|--------|--------|--------|--------|--------|--------|--------|--------|--------|--------|--------|--------|--------|--------|--------|--------|--------|--------|--------|--------|--------|--------|--------|--------|--------|--------|--------|--------|--------|--------|--------|--------|--------|--------|--------|--------|--------|--------|--------|--------|--------|--------|--------|--------|--------|--------|--------|--------|--------|--------|--------|--------|--------|--------|--------|--------|--------|--------|--------|--------|--------|--------|--------|--------|--------|--------|--------|--------|--------|--------|--------|--------|--------|--------|--------|--------|--------|--------|--------|--------|--------|--------|--------|--------|--------|--------|--------|--------|--------|--------|--------|--------|--------|--------|--------|--------|--------|--------|--------|--------|--------|--------|--------|--------|--------|--------|--------|--------|--------|--------|--------|--------|--------|--------|--------|--------|--------|--------|--------|--------|--------|--------|--------|--------|--------|--------|--------|--------|--------|--------|--------|--------|--------|--------|--------|--------|--------|--------|--------|--------|--------|--------|--------|--------|--------|--------|--------|--------|--------|--------|--------|--------|--------|--------|--------|--------|--------|--------|--------|--------|--------|--------|--------|--------|--------|--------|--------|--------|--------|--------|--------|--------|--------|--------|--------|--------|--------|--------|--------|--------|--------|--------|--------|--------|--------|--------|--------|--------|--------|--------|--------|--------|--------|--------|--------|--------|--------|--------|--------|--------|--------|--------|--------|--------|--------|--------|--------|--------|--------|--------|--------|--------|--------|--------|--------|--------|--------|--------|--------|--------|--------|--------|--------|--------|--------|--------|--------|--------|--------|--------|--------|--------|--------|--------|--------|--------|--------|--------|--------|--------|--------|--------|--------|--------|--------|--------|--------|--------|--------|--------|--------|--------|--------|--------|--------|--------|--------|--------|--------|--------|--------|--------|--------|--------|--------|--------|--------|--------|--------|--------|--------|--------|--------|--------|--------|--------|--------|--------|--------|--------|--------|--------|--------|--------|--------|--------|--------|--------|--------|--------|--------|--------|--------|--------|--------|--------|--------|--------|--------|--------|--------|--------|--------|--------|--------|--------|--------|--------|--------|--------|--------|--------|--------|--------|--------|--------|--------|--------|--------|--------|--------|--------|--------|--------|--------|--------|--------|--------|--------|--------|--------|--------|--------|--------|--------|--------|--------|--------|--------|--------|--------|--------|--------|--------|--------|--------|--------|--------|--------|--------|--------|--------|--------|--------|--------|--------|--------|--------|--------|--------|--------|--------|--------|--------|--------|--------|--------|--------|--------|--------|--------|--------|--------|--------|--------|--------|--------|--------|--------|--------|--------|--------|--------|--------|--------|--------|--------|--------|--------|--------|--------|--------|--------|--------|--------|--------|--------|--------|--------|--------|--------|--------|--------|--------|--------|--------|--------|--------|--------|--------|--------|--------|--------|--------|--------|--------|--------|--------|--------|--------|--------|--------|--------|--------|--------|--------|--------|--------|--------|--------|--------|--------|--------|--------|--------|--------|--------|--------|--------|--------|--------|--------|--------|--------|--------|--------|--------|--------|--------|--------|--------|--------|--------|--------|--------|--------|--------|--------|--------|--------|--------|--------|--------|--------|--------|--------|--------|--------|--------|--------|--------|--------|--------|--------|--------|--------|--------|--------|--------|--------|--------|--------|--------|--------|--------|--------|--------|--------|--------|--------|--------|--------|--------|--------|--------|--------|--------|--------|----------|

Table with multiple rows and columns containing numerical data, likely representing a dataset or a grid of values.







|        |     |     |     |     |     |     |     |     |     |     |     |     |     |     |     |     |     |     |     |     |     |     |     |     |     |     |     |     |     |     |     |     |     |     |     |     |     |     |     |     |     |     |     |     |     |     |     |     |     |     |     |     |     |     |     |     |     |     |     |     |     |     |     |     |     |     |     |     |     |     |     |     |     |     |     |     |     |     |     |     |     |     |     |     |     |     |     |     |     |     |     |     |     |     |     |     |     |     |     |     |     |     |     |     |     |     |     |     |     |     |     |     |     |     |     |     |     |     |     |     |     |     |     |     |     |     |     |     |     |     |     |     |     |     |     |     |     |     |     |     |     |     |     |     |     |     |     |     |     |     |     |     |     |     |     |     |     |     |     |     |     |     |     |     |     |     |     |     |     |     |     |     |     |     |     |     |     |     |     |     |     |     |     |     |     |     |     |     |     |     |     |     |     |     |     |     |     |     |     |     |     |     |     |     |     |     |     |     |     |     |     |     |     |     |     |     |     |     |     |     |     |     |     |     |     |     |     |     |     |     |     |     |     |     |     |     |     |     |     |     |     |     |     |     |     |     |     |     |     |     |     |     |     |     |     |     |     |     |     |     |     |     |     |     |     |     |     |     |     |     |     |     |     |     |     |     |     |     |     |     |     |     |     |     |     |     |     |     |     |     |     |     |     |     |     |     |     |     |     |     |     |     |     |     |     |     |     |     |     |     |     |     |     |     |     |     |     |     |     |     |     |     |     |     |     |     |     |     |     |     |     |     |     |     |     |     |     |     |     |     |     |     |     |     |     |     |     |     |     |     |     |     |     |     |     |     |     |     |     |     |     |     |     |     |     |     |     |     |     |     |     |     |     |     |     |     |     |     |     |     |     |     |     |     |     |     |     |     |     |     |     |     |     |     |     |     |     |     |     |     |     |     |     |     |      |      |      |      |      |      |      |      |      |      |      |      |      |      |      |      |      |      |      |      |      |      |      |      |      |      |      |      |      |      |      |      |      |      |      |      |      |      |      |      |      |      |      |      |      |      |      |      |      |      |      |      |      |      |      |      |      |      |      |      |      |      |      |      |      |      |      |      |      |      |      |      |      |      |      |      |      |      |      |      |      |      |      |      |      |      |      |      |      |      |      |      |      |      |      |      |      |      |      |      |      |      |      |      |      |      |      |      |      |      |      |      |      |      |      |      |      |      |      |      |      |      |      |      |      |      |      |      |      |      |      |      |      |      |      |      |      |      |      |      |      |      |      |      |      |      |      |      |      |      |      |      |      |      |      |      |      |      |      |      |      |      |      |      |      |      |      |      |      |      |      |      |      |      |      |      |      |      |      |      |      |      |      |      |      |      |      |      |      |      |      |      |      |      |      |      |      |      |      |      |      |      |      |      |      |      |      |      |      |      |      |      |      |      |      |      |      |      |      |      |      |      |      |      |      |      |      |      |      |      |      |      |      |      |      |      |      |      |      |      |      |      |      |      |      |      |      |      |      |      |      |      |      |      |      |      |      |      |      |      |      |      |      |      |      |      |      |      |      |      |      |      |      |      |      |      |      |      |      |      |      |      |      |      |      |      |      |      |      |      |      |      |      |      |      |      |      |      |      |      |      |      |      |      |      |      |      |      |      |      |      |      |      |      |      |      |      |      |      |      |      |      |      |      |      |      |      |      |      |      |      |      |      |      |      |      |      |      |      |      |      |      |      |      |      |      |      |      |      |      |      |      |      |      |      |      |      |      |      |      |      |      |      |      |      |      |      |      |      |      |      |      |      |      |      |      |      |      |      |      |      |      |      |      |      |      |      |      |      |      |      |      |      |      |      |      |      |      |      |      |      |      |      |      |      |      |      |      |      |      |      |      |      |      |      |      |      |      |      |      |      |      |      |      |      |      |      |      |      |      |      |      |      |      |      |      |      |      |      |      |      |      |      |      |      |      |      |      |      |      |      |      |      |      |      |      |      |      |      |      |      |      |      |      |      |      |      |      |      |      |      |      |      |      |      |      |      |      |      |      |      |      |      |      |      |      |      |      |      |      |      |      |      |      |      |      |      |      |      |      |      |      |      |      |      |      |      |      |      |      |      |      |      |      |      |      |      |      |      |      |      |      |      |      |      |      |      |      |      |      |      |      |      |      |      |      |      |      |      |      |      |      |      |      |      |      |      |      |      |      |      |      |      |      |      |      |      |      |      |      |      |      |      |      |      |      |      |      |      |      |      |      |      |      |      |      |      |      |      |      |      |      |      |      |      |      |      |      |      |      |      |      |      |      |      |      |      |      |      |      |      |      |      |      |      |      |      |      |      |      |      |      |      |      |      |      |      |      |      |      |      |      |      |      |      |      |      |      |      |      |      |      |      |      |      |      |      |      |      |      |      |      |      |      |      |      |      |      |      |      |      |      |      |      |      |      |      |      |      |      |      |      |      |      |      |      |      |      |      |      |      |      |      |      |      |      |      |      |      |      |      |      |      |      |      |      |      |      |      |      |      |      |      |      |      |      |      |      |      |      |      |      |      |      |      |      |      |      |      |      |      |      |      |      |      |      |      |      |      |      |      |      |      |      |      |      |      |      |      |      |      |      |      |      |      |      |      |      |      |      |      |      |      |      |      |      |      |      |      |      |      |      |      |      |      |      |      |      |      |      |      |      |      |      |      |      |      |      |      |      |      |      |      |      |      |      |      |      |      |      |      |      |      |      |      |      |      |      |      |      |      |      |      |      |      |      |      |      |      |      |      |      |      |      |      |      |      |      |      |      |      |      |      |      |      |      |      |      |      |      |      |      |      |      |      |      |      |      |      |      |      |      |      |      |      |      |      |      |      |      |      |      |      |      |      |      |      |      |      |      |      |      |      |      |      |      |      |      |      |      |      |      |      |      |      |      |      |      |      |      |      |      |      |      |      |      |      |      |      |      |      |      |      |      |      |      |      |      |      |      |      |      |      |      |      |      |      |      |      |      |      |      |      |      |      |      |      |      |      |      |      |      |      |      |      |      |      |      |      |      |      |      |      |      |      |      |      |      |      |      |      |      |      |      |      |      |      |      |      |      |      |      |      |      |      |      |      |      |      |      |      |      |      |      |      |      |      |      |      |      |      |      |      |      |      |      |      |      |      |      |      |      |      |      |      |      |      |      |      |      |      |      |      |      |      |      |      |      |      |      |      |      |      |      |      |      |      |      |      |      |      |      |      |      |      |      |      |      |      |      |      |      |  |
|--------|-----|-----|-----|-----|-----|-----|-----|-----|-----|-----|-----|-----|-----|-----|-----|-----|-----|-----|-----|-----|-----|-----|-----|-----|-----|-----|-----|-----|-----|-----|-----|-----|-----|-----|-----|-----|-----|-----|-----|-----|-----|-----|-----|-----|-----|-----|-----|-----|-----|-----|-----|-----|-----|-----|-----|-----|-----|-----|-----|-----|-----|-----|-----|-----|-----|-----|-----|-----|-----|-----|-----|-----|-----|-----|-----|-----|-----|-----|-----|-----|-----|-----|-----|-----|-----|-----|-----|-----|-----|-----|-----|-----|-----|-----|-----|-----|-----|-----|-----|-----|-----|-----|-----|-----|-----|-----|-----|-----|-----|-----|-----|-----|-----|-----|-----|-----|-----|-----|-----|-----|-----|-----|-----|-----|-----|-----|-----|-----|-----|-----|-----|-----|-----|-----|-----|-----|-----|-----|-----|-----|-----|-----|-----|-----|-----|-----|-----|-----|-----|-----|-----|-----|-----|-----|-----|-----|-----|-----|-----|-----|-----|-----|-----|-----|-----|-----|-----|-----|-----|-----|-----|-----|-----|-----|-----|-----|-----|-----|-----|-----|-----|-----|-----|-----|-----|-----|-----|-----|-----|-----|-----|-----|-----|-----|-----|-----|-----|-----|-----|-----|-----|-----|-----|-----|-----|-----|-----|-----|-----|-----|-----|-----|-----|-----|-----|-----|-----|-----|-----|-----|-----|-----|-----|-----|-----|-----|-----|-----|-----|-----|-----|-----|-----|-----|-----|-----|-----|-----|-----|-----|-----|-----|-----|-----|-----|-----|-----|-----|-----|-----|-----|-----|-----|-----|-----|-----|-----|-----|-----|-----|-----|-----|-----|-----|-----|-----|-----|-----|-----|-----|-----|-----|-----|-----|-----|-----|-----|-----|-----|-----|-----|-----|-----|-----|-----|-----|-----|-----|-----|-----|-----|-----|-----|-----|-----|-----|-----|-----|-----|-----|-----|-----|-----|-----|-----|-----|-----|-----|-----|-----|-----|-----|-----|-----|-----|-----|-----|-----|-----|-----|-----|-----|-----|-----|-----|-----|-----|-----|-----|-----|-----|-----|-----|-----|-----|-----|-----|-----|-----|-----|-----|-----|-----|-----|-----|-----|-----|-----|-----|-----|-----|-----|-----|-----|-----|-----|-----|-----|-----|-----|-----|-----|-----|-----|-----|-----|-----|-----|-----|-----|-----|-----|-----|-----|-----|-----|-----|-----|-----|-----|-----|-----|-----|-----|-----|-----|-----|-----|-----|-----|-----|-----|-----|-----|-----|-----|-----|-----|-----|-----|-----|-----|-----|-----|------|------|------|------|------|------|------|------|------|------|------|------|------|------|------|------|------|------|------|------|------|------|------|------|------|------|------|------|------|------|------|------|------|------|------|------|------|------|------|------|------|------|------|------|------|------|------|------|------|------|------|------|------|------|------|------|------|------|------|------|------|------|------|------|------|------|------|------|------|------|------|------|------|------|------|------|------|------|------|------|------|------|------|------|------|------|------|------|------|------|------|------|------|------|------|------|------|------|------|------|------|------|------|------|------|------|------|------|------|------|------|------|------|------|------|------|------|------|------|------|------|------|------|------|------|------|------|------|------|------|------|------|------|------|------|------|------|------|------|------|------|------|------|------|------|------|------|------|------|------|------|------|------|------|------|------|------|------|------|------|------|------|------|------|------|------|------|------|------|------|------|------|------|------|------|------|------|------|------|------|------|------|------|------|------|------|------|------|------|------|------|------|------|------|------|------|------|------|------|------|------|------|------|------|------|------|------|------|------|------|------|------|------|------|------|------|------|------|------|------|------|------|------|------|------|------|------|------|------|------|------|------|------|------|------|------|------|------|------|------|------|------|------|------|------|------|------|------|------|------|------|------|------|------|------|------|------|------|------|------|------|------|------|------|------|------|------|------|------|------|------|------|------|------|------|------|------|------|------|------|------|------|------|------|------|------|------|------|------|------|------|------|------|------|------|------|------|------|------|------|------|------|------|------|------|------|------|------|------|------|------|------|------|------|------|------|------|------|------|------|------|------|------|------|------|------|------|------|------|------|------|------|------|------|------|------|------|------|------|------|------|------|------|------|------|------|------|------|------|------|------|------|------|------|------|------|------|------|------|------|------|------|------|------|------|------|------|------|------|------|------|------|------|------|------|------|------|------|------|------|------|------|------|------|------|------|------|------|------|------|------|------|------|------|------|------|------|------|------|------|------|------|------|------|------|------|------|------|------|------|------|------|------|------|------|------|------|------|------|------|------|------|------|------|------|------|------|------|------|------|------|------|------|------|------|------|------|------|------|------|------|------|------|------|------|------|------|------|------|------|------|------|------|------|------|------|------|------|------|------|------|------|------|------|------|------|------|------|------|------|------|------|------|------|------|------|------|------|------|------|------|------|------|------|------|------|------|------|------|------|------|------|------|------|------|------|------|------|------|------|------|------|------|------|------|------|------|------|------|------|------|------|------|------|------|------|------|------|------|------|------|------|------|------|------|------|------|------|------|------|------|------|------|------|------|------|------|------|------|------|------|------|------|------|------|------|------|------|------|------|------|------|------|------|------|------|------|------|------|------|------|------|------|------|------|------|------|------|------|------|------|------|------|------|------|------|------|------|------|------|------|------|------|------|------|------|------|------|------|------|------|------|------|------|------|------|------|------|------|------|------|------|------|------|------|------|------|------|------|------|------|------|------|------|------|------|------|------|------|------|------|------|------|------|------|------|------|------|------|------|------|------|------|------|------|------|------|------|------|------|------|------|------|------|------|------|------|------|------|------|------|------|------|------|------|------|------|------|------|------|------|------|------|------|------|------|------|------|------|------|------|------|------|------|------|------|------|------|------|------|------|------|------|------|------|------|------|------|------|------|------|------|------|------|------|------|------|------|------|------|------|------|------|------|------|------|------|------|------|------|------|------|------|------|------|------|------|------|------|------|------|------|------|------|------|------|------|------|------|------|------|------|------|------|------|------|------|------|------|------|------|------|------|------|------|------|------|------|------|------|------|------|------|------|------|------|------|------|------|------|------|------|------|------|------|------|------|------|------|------|------|------|------|------|------|------|------|------|------|------|------|------|------|------|------|------|------|------|------|------|------|------|------|------|------|------|------|------|------|------|------|------|------|------|------|------|------|------|------|------|------|------|------|------|------|------|------|------|------|------|------|------|------|------|------|------|------|------|------|------|------|------|------|------|------|------|------|------|------|------|------|------|------|------|------|------|------|------|------|------|------|------|------|------|------|------|------|------|------|------|------|------|------|------|------|------|------|------|------|------|------|------|------|------|------|------|------|------|------|------|------|------|------|------|------|------|------|------|------|------|------|------|------|------|------|------|------|------|------|------|------|------|------|------|------|------|------|------|------|------|------|------|------|------|------|------|------|------|------|------|------|------|------|------|------|------|------|------|------|------|------|------|------|------|------|------|------|------|------|------|------|------|------|------|------|------|------|------|------|------|------|------|------|------|------|------|------|------|------|------|------|------|------|------|------|------|------|------|------|------|------|------|------|------|------|------|------|------|------|------|------|------|------|------|------|------|------|------|------|------|------|------|------|------|------|------|------|------|------|------|------|------|------|------|------|------|------|------|------|------|------|------|--|
| ESD000 | 175 | 181 | 188 | 195 | 199 | 202 | 204 | 206 | 208 | 210 | 212 | 214 | 216 | 218 | 220 | 222 | 224 | 226 | 228 | 230 | 232 | 234 | 236 | 238 | 240 | 242 | 244 | 246 | 248 | 250 | 252 | 254 | 256 | 258 | 260 | 262 | 264 | 266 | 268 | 270 | 272 | 274 | 276 | 278 | 280 | 282 | 284 | 286 | 288 | 290 | 292 | 294 | 296 | 298 | 300 | 302 | 304 | 306 | 308 | 310 | 312 | 314 | 316 | 318 | 320 | 322 | 324 | 326 | 328 | 330 | 332 | 334 | 336 | 338 | 340 | 342 | 344 | 346 | 348 | 350 | 352 | 354 | 356 | 358 | 360 | 362 | 364 | 366 | 368 | 370 | 372 | 374 | 376 | 378 | 380 | 382 | 384 | 386 | 388 | 390 | 392 | 394 | 396 | 398 | 400 | 402 | 404 | 406 | 408 | 410 | 412 | 414 | 416 | 418 | 420 | 422 | 424 | 426 | 428 | 430 | 432 | 434 | 436 | 438 | 440 | 442 | 444 | 446 | 448 | 450 | 452 | 454 | 456 | 458 | 460 | 462 | 464 | 466 | 468 | 470 | 472 | 474 | 476 | 478 | 480 | 482 | 484 | 486 | 488 | 490 | 492 | 494 | 496 | 498 | 500 | 502 | 504 | 506 | 508 | 510 | 512 | 514 | 516 | 518 | 520 | 522 | 524 | 526 | 528 | 530 | 532 | 534 | 536 | 538 | 540 | 542 | 544 | 546 | 548 | 550 | 552 | 554 | 556 | 558 | 560 | 562 | 564 | 566 | 568 | 570 | 572 | 574 | 576 | 578 | 580 | 582 | 584 | 586 | 588 | 590 | 592 | 594 | 596 | 598 | 600 | 602 | 604 | 606 | 608 | 610 | 612 | 614 | 616 | 618 | 620 | 622 | 624 | 626 | 628 | 630 | 632 | 634 | 636 | 638 | 640 | 642 | 644 | 646 | 648 | 650 | 652 | 654 | 656 | 658 | 660 | 662 | 664 | 666 | 668 | 670 | 672 | 674 | 676 | 678 | 680 | 682 | 684 | 686 | 688 | 690 | 692 | 694 | 696 | 698 | 700 | 702 | 704 | 706 | 708 | 710 | 712 | 714 | 716 | 718 | 720 | 722 | 724 | 726 | 728 | 730 | 732 | 734 | 736 | 738 | 740 | 742 | 744 | 746 | 748 | 750 | 752 | 754 | 756 | 758 | 760 | 762 | 764 | 766 | 768 | 770 | 772 | 774 | 776 | 778 | 780 | 782 | 784 | 786 | 788 | 790 | 792 | 794 | 796 | 798 | 800 | 802 | 804 | 806 | 808 | 810 | 812 | 814 | 816 | 818 | 820 | 822 | 824 | 826 | 828 | 830 | 832 | 834 | 836 | 838 | 840 | 842 | 844 | 846 | 848 | 850 | 852 | 854 | 856 | 858 | 860 | 862 | 864 | 866 | 868 | 870 | 872 | 874 | 876 | 878 | 880 | 882 | 884 | 886 | 888 | 890 | 892 | 894 | 896 | 898 | 900 | 902 | 904 | 906 | 908 | 910 | 912 | 914 | 916 | 918 | 920 | 922 | 924 | 926 | 928 | 930 | 932 | 934 | 936 | 938 | 940 | 942 | 944 | 946 | 948 | 950 | 952 | 954 | 956 | 958 | 960 | 962 | 964 | 966 | 968 | 970 | 972 | 974 | 976 | 978 | 980 | 982 | 984 | 986 | 988 | 990 | 992 | 994 | 996 | 998 | 1000 | 1002 | 1004 | 1006 | 1008 | 1010 | 1012 | 1014 | 1016 | 1018 | 1020 | 1022 | 1024 | 1026 | 1028 | 1030 | 1032 | 1034 | 1036 | 1038 | 1040 | 1042 | 1044 | 1046 | 1048 | 1050 | 1052 | 1054 | 1056 | 1058 | 1060 | 1062 | 1064 | 1066 | 1068 | 1070 | 1072 | 1074 | 1076 | 1078 | 1080 | 1082 | 1084 | 1086 | 1088 | 1090 | 1092 | 1094 | 1096 | 1098 | 1100 | 1102 | 1104 | 1106 | 1108 | 1110 | 1112 | 1114 | 1116 | 1118 | 1120 | 1122 | 1124 | 1126 | 1128 | 1130 | 1132 | 1134 | 1136 | 1138 | 1140 | 1142 | 1144 | 1146 | 1148 | 1150 | 1152 | 1154 | 1156 | 1158 | 1160 | 1162 | 1164 | 1166 | 1168 | 1170 | 1172 | 1174 | 1176 | 1178 | 1180 | 1182 | 1184 | 1186 | 1188 | 1190 | 1192 | 1194 | 1196 | 1198 | 1200 | 1202 | 1204 | 1206 | 1208 | 1210 | 1212 | 1214 | 1216 | 1218 | 1220 | 1222 | 1224 | 1226 | 1228 | 1230 | 1232 | 1234 | 1236 | 1238 | 1240 | 1242 | 1244 | 1246 | 1248 | 1250 | 1252 | 1254 | 1256 | 1258 | 1260 | 1262 | 1264 | 1266 | 1268 | 1270 | 1272 | 1274 | 1276 | 1278 | 1280 | 1282 | 1284 | 1286 | 1288 | 1290 | 1292 | 1294 | 1296 | 1298 | 1300 | 1302 | 1304 | 1306 | 1308 | 1310 | 1312 | 1314 | 1316 | 1318 | 1320 | 1322 | 1324 | 1326 | 1328 | 1330 | 1332 | 1334 | 1336 | 1338 | 1340 | 1342 | 1344 | 1346 | 1348 | 1350 | 1352 | 1354 | 1356 | 1358 | 1360 | 1362 | 1364 | 1366 | 1368 | 1370 | 1372 | 1374 | 1376 | 1378 | 1380 | 1382 | 1384 | 1386 | 1388 | 1390 | 1392 | 1394 | 1396 | 1398 | 1400 | 1402 | 1404 | 1406 | 1408 | 1410 | 1412 | 1414 | 1416 | 1418 | 1420 | 1422 | 1424 | 1426 | 1428 | 1430 | 1432 | 1434 | 1436 | 1438 | 1440 | 1442 | 1444 | 1446 | 1448 | 1450 | 1452 | 1454 | 1456 | 1458 | 1460 | 1462 | 1464 | 1466 | 1468 | 1470 | 1472 | 1474 | 1476 | 1478 | 1480 | 1482 | 1484 | 1486 | 1488 | 1490 | 1492 | 1494 | 1496 | 1498 | 1500 | 1502 | 1504 | 1506 | 1508 | 1510 | 1512 | 1514 | 1516 | 1518 | 1520 | 1522 | 1524 | 1526 | 1528 | 1530 | 1532 | 1534 | 1536 | 1538 | 1540 | 1542 | 1544 | 1546 | 1548 | 1550 | 1552 | 1554 | 1556 | 1558 | 1560 | 1562 | 1564 | 1566 | 1568 | 1570 | 1572 | 1574 | 1576 | 1578 | 1580 | 1582 | 1584 | 1586 | 1588 | 1590 | 1592 | 1594 | 1596 | 1598 | 1600 | 1602 | 1604 | 1606 | 1608 | 1610 | 1612 | 1614 | 1616 | 1618 | 1620 | 1622 | 1624 | 1626 | 1628 | 1630 | 1632 | 1634 | 1636 | 1638 | 1640 | 1642 | 1644 | 1646 | 1648 | 1650 | 1652 | 1654 | 1656 | 1658 | 1660 | 1662 | 1664 | 1666 | 1668 | 1670 | 1672 | 1674 | 1676 | 1678 | 1680 | 1682 | 1684 | 1686 | 1688 | 1690 | 1692 | 1694 | 1696 | 1698 | 1700 | 1702 | 1704 | 1706 | 1708 | 1710 | 1712 | 1714 | 1716 | 1718 | 1720 | 1722 | 1724 | 1726 | 1728 | 1730 | 1732 | 1734 | 1736 | 1738 | 1740 | 1742 | 1744 | 1746 | 1748 | 1750 | 1752 | 1754 | 1756 | 1758 | 1760 | 1762 | 1764 | 1766 | 1768 | 1770 | 1772 | 1774 | 1776 | 1778 | 1780 | 1782 | 1784 | 1786 | 1788 | 1790 | 1792 | 1794 | 1796 | 1798 | 1800 | 1802 | 1804 | 1806 | 1808 | 1810 | 1812 | 1814 | 1816 | 1818 | 1820 | 1822 | 1824 | 1826 | 1828 | 1830 | 1832 | 1834 | 1836 | 1838 | 1840 | 1842 | 1844 | 1846 | 1848 | 1850 | 1852 | 1854 | 1856 | 1858 | 1860 | 1862 | 1864 | 1866 | 1868 | 1870 | 1872 | 1874 | 1876 | 1878 | 1880 | 1882 | 1884 | 1886 | 1888 | 1890 | 1892 | 1894 | 1896 | 1898 | 1900 | 1902 | 1904 | 1906 | 1908 | 1910 | 1912 | 1914 | 1916 | 1918 | 1920 | 1922 | 1924 | 1926 | 1928 | 1930 | 1932 | 1934 | 1936 | 1938 | 1940 | 1942 | 1944 | 1946 | 1948 | 1950 | 1952 | 1954 | 1956 | 1958 | 1960 | 1962 | 1964 | 1966 | 1968 | 1970 | 1972 | 1974 | 1976 | 1978 | 1980 | 1982 | 1984 | 1986 | 1988 | 1990 | 1992 | 1994 | 1996 | 1998 | 2000 | 2002 | 2004 | 2006 | 2008 | 2010 | 2012 | 2014 | 2016 | 2018 | 2020 | 2022 | 2024 | 2026 | 2028 | 2030 | 2032 | 2034 | 2036 | 2038 | 2040 | 2042 | 2044 | 2046 | 2048 | 2050 | 2052 | 2054 | 2056 | 2058 | 2060 | 2062 | 2064 | 2066 | 2068 | 2070 | 2072 | 2074 | 2076 | 2078 | 2080 | 2082 | 2084 | 2086 | 2088 | 2090 | 2092 | 2094 | 2096 | 2098 | 2100 | 2102 | 2104 | 2106 | 2108 | 2110 | 2112 | 2114 | 2116 | 2118 | 2120 | 2122 | 2124 | 2126 | 2128 | 2130 | 2132 | 2134 | 2136 | 2138 | 2140 | 2142 | 2144 | 2146 | 2148 | 2150 | 2152 | 2154 | 2156 | 2158 | 2160 | 2162 | 2164 | 2166 | 2168 | 2170 | 2172 | 2174 | 2176 | 2178 | 2180 | 2182 | 2184 | 2186 | 2188 | 2190 | 2192 | 2194 | 2196 | 2198 | 2200 | 2202 | 2204 | 2206 | 2208 | 2210 | 2212 | 2214 | 2216 | 2218 | 2220 | 2222 | 2224 | 2226 | 2228 | 2230 | 2232 | 2234 | 2236 | 2238 | 2240 | 2242 | 2244 | 2246 | 2248 | 2250 | 2252 | 2254 | 2256 | 2258 | 2260 | 2262 | 2264 | 2266 | 2268 | 2270 | 2272 | 2274 | 2276 | 2278 | 2280 | 2282 | 2284 | 2286 | 2288 | 2290 | 2292 | 2294 | 2296 | 2298 | 2300 | 2302 | 2304 | 2306 | 2308 | 2310 | 2312 | 2314 | 2316 | 2318 | 2320 | 2322 | 2324 | 2326 | 2328 | 2330 | 2332 | 2334 | 2336 | 2338 | 2340 | 2342 | 2344 | 2346 | 2348 | 2350 | 2352 | 2354 | 2356 | 2358 | 2360 | 2362 | 2364 | 2366 | 2368 | 2370 | 2372 | 2374 | 2376 | 2378 | 2380 | 2382 | 2384 | 2386 | 2388 | 2390 | 2392 | 2394 | 2396 | 2398 | 2400 | 2402 | 2404 | 2406 | 2408 | 2410 | 2412 | 2414 | 2416 | 2418 | 2420 | 2422 | 2424 | 2426 | 2428 | 2430 | 2432 | 2434 | 2436 | 2438 | 2440 | 2442 | 2444 | 2446 | 2448 | 2450 | 2452 | 2454 | 2456 | 2458 | 2460 | 2462 | 2464 | 2466 | 2468 | 2470 | 2472 | 2474 | 2476 | 2478 | 2480 | 2482 | 2484 | 2486 | 2488 | 2490 | 2492 | 2494 | 2496 | 2498 | 2500 | 2502 | 2504 | 2506 | 2508 | 2510 | 2512 | 2514 | 2516 | 2518 | 2520 | 2522 | 2524 | 2526 | 2528 | 2530 | 2532 | 2534 | 2536 | 2538 | 2540 | 2542 | 2544 | 2546 | 2548 | 2550 | 2552 | 2554 | 2556 | 2558 | 2560 | 2562 | 2564 | 2566 | 2568 | 2570 | 2572 | 2574 | 2576 | 2578 | 2580 | 2582 | 2584 | 2586 | 2588 | 2590 | 2592 | 2594 | 2596 | 2598 | 2600 | 2602 | 2604 | 2606 | 2608 | 2610 | 2612 | 2614 | 2616 | 2618 | 2620 | 2622 | 2624 | 2626 | 2628 | 2630 | 2632 | 2634 | 2636 | 2638 | 2640 | 2642 | 2644 | 2646 | 2648 | 2650 | 2652 | 2654 | 2656 | 2658 | 2660 | 2662 | 2664 | 2666 | 2668 | 2670 | 2672 | 2674 | 2676 | 2678 | 2680 | 2682 | 2684 | 2686 | 2688 | 2690 | 2692 | 2694 | 2696 | 2698 | 2700 | 2702 | 2704 | 2706 | 2708 | 2710 | 2712 | 2714 | 2716 | 2718 | 2720 | 2722 | 2724 | 2726 | 2728 | 2730 | 2732 | 2734 | 2736 | 2738 | 2740 | 2742 | 2744 | 2746 | 2748 | 2750 | 2752 | 2754 | 2756 | 2758 | 2760 | 2762 | 2764 | 2766 | 2768 | 2770 | 2772 | 2774 | 2776 | 2778 | 2780 | 2782 | 2784 | 2786 | 2788 | 2790 | 2792 | 2794 | 2796 | 2798 | 2800 | 2802 | 2804 | 2806 | 2808 | 2810 | 2812 | 2814 | 2816 | 2818 | 2820 | 2822 | 2824 | 2826 | 2828 | 2830 | 2832 | 2834 | 2836 | 2838 | 2840 | 2842 | 2844 | 2846 | 2848 | 2850 | 2852 | 2854 | 2856 | 2858 | 2860 | 2862 | 2864 | 2866 | 2868 | 2870 | 2872 | 2874 | 2876 | 2878 | 2880 | 2882 | 2884 | 2886 | 2888 | 2890 | 2892 | 2894 | 2896 | 2898 | 2900 | 2902 | 2904 | 2906 | 2908 | 2910 | 2912 | 2914 | 2916 | 2918 | 2920 | 2922 | 2924 | 2926 | 2928 | 2930 | 2932 | 2934 | 2936 | 2938 | 2940 | 2942 | 2944 | 2946 | 2948 | 2950 | 2952 | 2954 | 2956 | 2958 | 2960 | 2962 | 2964 | 2966 | 2968 | 2970 | 2972 | 2974 | 2976 | 2978 | 2980 | 2982 | 2984 | 2986 | 2988 | 2990 | 2992 | 2994 | 2996 | 2998 | 3000 | 3002 | 3004 | 3006 | 3008 | 3010 | 3012 | 3014 | 3016 | 3018 | 3020 | 3022 |  |
|--------|-----|-----|-----|-----|-----|-----|-----|-----|-----|-----|-----|-----|-----|-----|-----|-----|-----|-----|-----|-----|-----|-----|-----|-----|-----|-----|-----|-----|-----|-----|-----|-----|-----|-----|-----|-----|-----|-----|-----|-----|-----|-----|-----|-----|-----|-----|-----|-----|-----|-----|-----|-----|-----|-----|-----|-----|-----|-----|-----|-----|-----|-----|-----|-----|-----|-----|-----|-----|-----|-----|-----|-----|-----|-----|-----|-----|-----|-----|-----|-----|-----|-----|-----|-----|-----|-----|-----|-----|-----|-----|-----|-----|-----|-----|-----|-----|-----|-----|-----|-----|-----|-----|-----|-----|-----|-----|-----|-----|-----|-----|-----|-----|-----|-----|-----|-----|-----|-----|-----|-----|-----|-----|-----|-----|-----|-----|-----|-----|-----|-----|-----|-----|-----|-----|-----|-----|-----|-----|-----|-----|-----|-----|-----|-----|-----|-----|-----|-----|-----|-----|-----|-----|-----|-----|-----|-----|-----|-----|-----|-----|-----|-----|-----|-----|-----|-----|-----|-----|-----|-----|-----|-----|-----|-----|-----|-----|-----|-----|-----|-----|-----|-----|-----|-----|-----|-----|-----|-----|-----|-----|-----|-----|-----|-----|-----|-----|-----|-----|-----|-----|-----|-----|-----|-----|-----|-----|-----|-----|-----|-----|-----|-----|-----|-----|-----|-----|-----|-----|-----|-----|-----|-----|-----|-----|-----|-----|-----|-----|-----|-----|-----|-----|-----|-----|-----|-----|-----|-----|-----|-----|-----|-----|-----|-----|-----|-----|-----|-----|-----|-----|-----|-----|-----|-----|-----|-----|-----|-----|-----|-----|-----|-----|-----|-----|-----|-----|-----|-----|-----|-----|-----|-----|-----|-----|-----|-----|-----|-----|-----|-----|-----|-----|-----|-----|-----|-----|-----|-----|-----|-----|-----|-----|-----|-----|-----|-----|-----|-----|-----|-----|-----|-----|-----|-----|-----|-----|-----|-----|-----|-----|-----|-----|-----|-----|-----|-----|-----|-----|-----|-----|-----|-----|-----|-----|-----|-----|-----|-----|-----|-----|-----|-----|-----|-----|-----|-----|-----|-----|-----|-----|-----|-----|-----|-----|-----|-----|-----|-----|-----|-----|-----|-----|-----|-----|-----|-----|-----|-----|-----|-----|-----|-----|-----|-----|-----|-----|-----|-----|-----|-----|-----|-----|-----|-----|-----|-----|-----|-----|-----|-----|-----|-----|-----|-----|-----|-----|-----|-----|-----|-----|-----|-----|-----|-----|-----|-----|-----|-----|-----|-----|-----|-----|-----|-----|------|------|------|------|------|------|------|------|------|------|------|------|------|------|------|------|------|------|------|------|------|------|------|------|------|------|------|------|------|------|------|------|------|------|------|------|------|------|------|------|------|------|------|------|------|------|------|------|------|------|------|------|------|------|------|------|------|------|------|------|------|------|------|------|------|------|------|------|------|------|------|------|------|------|------|------|------|------|------|------|------|------|------|------|------|------|------|------|------|------|------|------|------|------|------|------|------|------|------|------|------|------|------|------|------|------|------|------|------|------|------|------|------|------|------|------|------|------|------|------|------|------|------|------|------|------|------|------|------|------|------|------|------|------|------|------|------|------|------|------|------|------|------|------|------|------|------|------|------|------|------|------|------|------|------|------|------|------|------|------|------|------|------|------|------|------|------|------|------|------|------|------|------|------|------|------|------|------|------|------|------|------|------|------|------|------|------|------|------|------|------|------|------|------|------|------|------|------|------|------|------|------|------|------|------|------|------|------|------|------|------|------|------|------|------|------|------|------|------|------|------|------|------|------|------|------|------|------|------|------|------|------|------|------|------|------|------|------|------|------|------|------|------|------|------|------|------|------|------|------|------|------|------|------|------|------|------|------|------|------|------|------|------|------|------|------|------|------|------|------|------|------|------|------|------|------|------|------|------|------|------|------|------|------|------|------|------|------|------|------|------|------|------|------|------|------|------|------|------|------|------|------|------|------|------|------|------|------|------|------|------|------|------|------|------|------|------|------|------|------|------|------|------|------|------|------|------|------|------|------|------|------|------|------|------|------|------|------|------|------|------|------|------|------|------|------|------|------|------|------|------|------|------|------|------|------|------|------|------|------|------|------|------|------|------|------|------|------|------|------|------|------|------|------|------|------|------|------|------|------|------|------|------|------|------|------|------|------|------|------|------|------|------|------|------|------|------|------|------|------|------|------|------|------|------|------|------|------|------|------|------|------|------|------|------|------|------|------|------|------|------|------|------|------|------|------|------|------|------|------|------|------|------|------|------|------|------|------|------|------|------|------|------|------|------|------|------|------|------|------|------|------|------|------|------|------|------|------|------|------|------|------|------|------|------|------|------|------|------|------|------|------|------|------|------|------|------|------|------|------|------|------|------|------|------|------|------|------|------|------|------|------|------|------|------|------|------|------|------|------|------|------|------|------|------|------|------|------|------|------|------|------|------|------|------|------|------|------|------|------|------|------|------|------|------|------|------|------|------|------|------|------|------|------|------|------|------|------|------|------|------|------|------|------|------|------|------|------|------|------|------|------|------|------|------|------|------|------|------|------|------|------|------|------|------|------|------|------|------|------|------|------|------|------|------|------|------|------|------|------|------|------|------|------|------|------|------|------|------|------|------|------|------|------|------|------|------|------|------|------|------|------|------|------|------|------|------|------|------|------|------|------|------|------|------|------|------|------|------|------|------|------|------|------|------|------|------|------|------|------|------|------|------|------|------|------|------|------|------|------|------|------|------|------|------|------|------|------|------|------|------|------|------|------|------|------|------|------|------|------|------|------|------|------|------|------|------|------|------|------|------|------|------|------|------|------|------|------|------|------|------|------|------|------|------|------|------|------|------|------|------|------|------|------|------|------|------|------|------|------|------|------|------|------|------|------|------|------|------|------|------|------|------|------|------|------|------|------|------|------|------|------|------|------|------|------|------|------|------|------|------|------|------|------|------|------|------|------|------|------|------|------|------|------|------|------|------|------|------|------|------|------|------|------|------|------|------|------|------|------|------|------|------|------|------|------|------|------|------|------|------|------|------|------|------|------|------|------|------|------|------|------|------|------|------|------|------|------|------|------|------|------|------|------|------|------|------|------|------|------|------|------|------|------|------|------|------|------|------|------|------|------|------|------|------|------|------|------|------|------|------|------|------|------|------|------|------|------|------|------|------|------|------|------|------|------|------|------|------|------|------|------|------|------|------|------|------|------|------|------|------|------|------|------|------|------|------|------|------|------|------|------|------|------|------|------|------|------|------|------|------|------|------|------|------|------|------|------|------|------|------|------|------|------|------|------|------|------|------|------|------|------|------|------|------|------|------|------|------|------|------|------|------|------|------|------|------|------|------|------|------|------|------|------|------|------|------|------|------|------|------|------|------|------|------|------|------|------|------|------|------|------|------|------|------|------|------|------|------|------|------|------|------|------|------|------|------|------|------|------|------|------|------|------|------|------|------|------|------|------|------|------|------|------|------|------|------|------|------|------|------|------|------|------|------|------|------|------|------|------|------|------|------|------|------|------|------|------|------|------|------|------|------|------|------|------|------|------|------|------|------|------|------|------|------|------|------|------|------|------|------|------|--|



















|      |     |     |     |     |     |     |     |     |     |     |     |     |     |     |     |     |     |     |     |     |     |     |     |     |     |     |     |      |      |      |      |      |      |      |      |      |      |      |      |      |      |      |      |      |      |      |      |      |      |      |      |      |      |      |      |      |      |      |      |      |      |      |      |      |      |      |      |      |      |      |       |       |       |       |       |       |       |       |       |       |       |       |       |       |       |       |       |       |       |       |       |       |       |       |       |       |       |       |       |       |       |       |       |       |       |       |       |       |       |       |       |       |       |       |       |       |       |       |       |       |       |       |       |       |       |       |       |       |       |       |       |       |       |       |       |       |       |       |       |       |       |       |       |       |       |       |       |       |       |       |       |       |       |       |       |       |       |       |       |       |       |       |       |       |       |       |       |       |       |       |       |       |       |       |       |       |       |       |       |       |       |       |       |       |       |       |       |       |       |       |       |       |       |       |       |       |       |       |       |       |       |       |       |       |       |       |       |       |       |       |       |       |       |       |       |       |       |       |       |       |       |       |       |       |       |       |       |       |       |       |       |       |       |       |       |       |       |       |       |       |       |       |       |       |       |       |       |       |       |       |       |       |       |       |       |       |       |       |       |       |       |       |       |       |       |       |       |       |       |       |       |       |       |       |       |       |       |       |       |       |       |       |       |       |       |       |       |       |       |       |       |       |       |       |       |       |       |       |       |       |       |       |       |       |       |       |       |       |       |       |       |       |       |       |       |       |       |       |       |       |       |       |       |       |       |       |       |       |       |       |       |       |       |       |       |       |       |       |       |       |       |       |       |       |       |       |       |       |       |       |       |       |       |       |       |       |       |       |       |       |       |       |       |       |       |       |       |       |       |       |       |       |       |       |       |       |       |       |       |       |        |        |        |        |        |        |        |        |        |        |        |        |        |        |        |        |        |        |        |        |        |        |        |        |        |        |        |        |        |        |        |        |        |        |        |        |        |        |        |        |        |        |        |        |        |        |        |        |        |        |        |        |        |        |        |        |        |        |        |        |        |        |        |        |        |        |        |        |        |        |        |        |        |        |        |        |        |        |        |        |        |        |        |        |        |        |        |        |        |        |        |        |        |        |        |        |        |        |        |        |        |        |        |        |        |        |        |        |        |        |        |        |        |        |        |        |        |        |        |        |        |        |        |        |        |        |        |        |        |        |        |        |        |        |        |        |        |        |        |        |        |        |        |        |        |        |        |        |        |        |        |        |        |        |        |        |        |        |        |        |        |        |        |        |        |        |        |        |        |        |        |        |        |        |        |        |        |        |        |        |        |        |        |        |        |        |        |        |        |        |        |        |        |        |        |        |        |        |        |        |        |        |        |        |        |        |        |        |        |        |        |        |        |        |        |        |        |        |        |        |        |        |        |        |        |        |        |        |        |        |        |        |        |        |        |        |        |        |        |        |        |        |        |        |        |        |        |        |        |        |        |        |        |        |        |        |        |        |        |        |        |        |        |        |        |        |        |        |        |        |        |        |        |        |        |        |        |        |        |        |        |        |        |        |        |        |        |        |        |        |        |        |        |        |        |        |        |        |        |        |        |        |        |        |        |        |        |        |        |        |        |        |        |        |        |        |        |        |        |        |        |        |        |        |        |        |        |        |        |        |        |        |        |        |        |        |        |        |        |        |        |        |        |        |        |        |        |        |        |        |        |        |        |        |        |        |        |        |        |        |        |        |        |        |        |        |        |        |        |        |        |        |        |        |        |        |        |        |        |        |        |        |        |        |        |        |        |        |        |        |        |        |        |        |        |        |        |        |        |        |        |        |        |        |        |        |        |        |        |        |        |        |        |        |        |        |        |        |        |        |        |        |        |        |        |        |        |        |        |        |        |        |        |        |        |        |        |        |        |        |        |        |        |        |        |        |        |        |        |        |        |        |        |        |        |        |        |        |        |        |        |        |        |        |        |        |        |        |        |        |        |        |        |        |        |        |        |        |        |        |        |        |        |        |        |        |        |        |        |        |        |        |        |        |        |        |        |        |        |        |        |        |        |        |        |        |        |        |        |        |        |        |        |        |        |        |        |        |        |        |        |        |        |        |        |        |        |        |        |        |        |        |        |        |        |        |        |        |        |        |        |        |        |        |        |        |        |        |        |        |        |        |        |        |        |        |        |        |        |        |        |        |        |        |        |        |        |        |        |        |        |        |        |        |        |        |        |        |        |        |        |        |        |        |        |        |        |        |        |        |        |        |        |        |        |        |        |        |        |        |        |        |        |        |        |        |        |        |        |        |        |        |        |        |        |        |        |        |        |        |        |        |        |        |        |        |        |        |        |        |        |        |        |        |        |        |        |        |        |        |        |        |        |        |        |        |        |        |        |        |        |        |        |        |        |        |        |        |        |        |        |        |        |        |        |        |        |        |        |        |        |        |        |        |        |        |        |        |        |        |        |        |        |        |        |        |        |        |        |        |        |        |        |        |        |        |        |        |        |        |        |        |        |        |        |        |        |        |        |        |        |        |        |        |        |        |        |        |        |        |        |        |        |        |        |        |        |        |        |        |        |        |        |        |        |        |        |        |        |        |        |        |        |        |        |        |        |        |        |        |        |        |        |        |        |        |        |        |        |        |        |        |        |        |        |        |        |        |        |        |        |        |        |        |        |        |        |        |        |        |        |        |        |        |        |
|------|-----|-----|-----|-----|-----|-----|-----|-----|-----|-----|-----|-----|-----|-----|-----|-----|-----|-----|-----|-----|-----|-----|-----|-----|-----|-----|-----|------|------|------|------|------|------|------|------|------|------|------|------|------|------|------|------|------|------|------|------|------|------|------|------|------|------|------|------|------|------|------|------|------|------|------|------|------|------|------|------|------|------|------|-------|-------|-------|-------|-------|-------|-------|-------|-------|-------|-------|-------|-------|-------|-------|-------|-------|-------|-------|-------|-------|-------|-------|-------|-------|-------|-------|-------|-------|-------|-------|-------|-------|-------|-------|-------|-------|-------|-------|-------|-------|-------|-------|-------|-------|-------|-------|-------|-------|-------|-------|-------|-------|-------|-------|-------|-------|-------|-------|-------|-------|-------|-------|-------|-------|-------|-------|-------|-------|-------|-------|-------|-------|-------|-------|-------|-------|-------|-------|-------|-------|-------|-------|-------|-------|-------|-------|-------|-------|-------|-------|-------|-------|-------|-------|-------|-------|-------|-------|-------|-------|-------|-------|-------|-------|-------|-------|-------|-------|-------|-------|-------|-------|-------|-------|-------|-------|-------|-------|-------|-------|-------|-------|-------|-------|-------|-------|-------|-------|-------|-------|-------|-------|-------|-------|-------|-------|-------|-------|-------|-------|-------|-------|-------|-------|-------|-------|-------|-------|-------|-------|-------|-------|-------|-------|-------|-------|-------|-------|-------|-------|-------|-------|-------|-------|-------|-------|-------|-------|-------|-------|-------|-------|-------|-------|-------|-------|-------|-------|-------|-------|-------|-------|-------|-------|-------|-------|-------|-------|-------|-------|-------|-------|-------|-------|-------|-------|-------|-------|-------|-------|-------|-------|-------|-------|-------|-------|-------|-------|-------|-------|-------|-------|-------|-------|-------|-------|-------|-------|-------|-------|-------|-------|-------|-------|-------|-------|-------|-------|-------|-------|-------|-------|-------|-------|-------|-------|-------|-------|-------|-------|-------|-------|-------|-------|-------|-------|-------|-------|-------|-------|-------|-------|-------|-------|-------|-------|-------|-------|-------|-------|-------|-------|-------|-------|-------|-------|-------|-------|-------|-------|-------|-------|-------|-------|-------|-------|-------|-------|-------|-------|-------|-------|-------|-------|-------|-------|-------|-------|-------|-------|-------|-------|-------|-------|-------|-------|-------|-------|-------|-------|-------|-------|-------|-------|-------|-------|-------|-------|-------|--------|--------|--------|--------|--------|--------|--------|--------|--------|--------|--------|--------|--------|--------|--------|--------|--------|--------|--------|--------|--------|--------|--------|--------|--------|--------|--------|--------|--------|--------|--------|--------|--------|--------|--------|--------|--------|--------|--------|--------|--------|--------|--------|--------|--------|--------|--------|--------|--------|--------|--------|--------|--------|--------|--------|--------|--------|--------|--------|--------|--------|--------|--------|--------|--------|--------|--------|--------|--------|--------|--------|--------|--------|--------|--------|--------|--------|--------|--------|--------|--------|--------|--------|--------|--------|--------|--------|--------|--------|--------|--------|--------|--------|--------|--------|--------|--------|--------|--------|--------|--------|--------|--------|--------|--------|--------|--------|--------|--------|--------|--------|--------|--------|--------|--------|--------|--------|--------|--------|--------|--------|--------|--------|--------|--------|--------|--------|--------|--------|--------|--------|--------|--------|--------|--------|--------|--------|--------|--------|--------|--------|--------|--------|--------|--------|--------|--------|--------|--------|--------|--------|--------|--------|--------|--------|--------|--------|--------|--------|--------|--------|--------|--------|--------|--------|--------|--------|--------|--------|--------|--------|--------|--------|--------|--------|--------|--------|--------|--------|--------|--------|--------|--------|--------|--------|--------|--------|--------|--------|--------|--------|--------|--------|--------|--------|--------|--------|--------|--------|--------|--------|--------|--------|--------|--------|--------|--------|--------|--------|--------|--------|--------|--------|--------|--------|--------|--------|--------|--------|--------|--------|--------|--------|--------|--------|--------|--------|--------|--------|--------|--------|--------|--------|--------|--------|--------|--------|--------|--------|--------|--------|--------|--------|--------|--------|--------|--------|--------|--------|--------|--------|--------|--------|--------|--------|--------|--------|--------|--------|--------|--------|--------|--------|--------|--------|--------|--------|--------|--------|--------|--------|--------|--------|--------|--------|--------|--------|--------|--------|--------|--------|--------|--------|--------|--------|--------|--------|--------|--------|--------|--------|--------|--------|--------|--------|--------|--------|--------|--------|--------|--------|--------|--------|--------|--------|--------|--------|--------|--------|--------|--------|--------|--------|--------|--------|--------|--------|--------|--------|--------|--------|--------|--------|--------|--------|--------|--------|--------|--------|--------|--------|--------|--------|--------|--------|--------|--------|--------|--------|--------|--------|--------|--------|--------|--------|--------|--------|--------|--------|--------|--------|--------|--------|--------|--------|--------|--------|--------|--------|--------|--------|--------|--------|--------|--------|--------|--------|--------|--------|--------|--------|--------|--------|--------|--------|--------|--------|--------|--------|--------|--------|--------|--------|--------|--------|--------|--------|--------|--------|--------|--------|--------|--------|--------|--------|--------|--------|--------|--------|--------|--------|--------|--------|--------|--------|--------|--------|--------|--------|--------|--------|--------|--------|--------|--------|--------|--------|--------|--------|--------|--------|--------|--------|--------|--------|--------|--------|--------|--------|--------|--------|--------|--------|--------|--------|--------|--------|--------|--------|--------|--------|--------|--------|--------|--------|--------|--------|--------|--------|--------|--------|--------|--------|--------|--------|--------|--------|--------|--------|--------|--------|--------|--------|--------|--------|--------|--------|--------|--------|--------|--------|--------|--------|--------|--------|--------|--------|--------|--------|--------|--------|--------|--------|--------|--------|--------|--------|--------|--------|--------|--------|--------|--------|--------|--------|--------|--------|--------|--------|--------|--------|--------|--------|--------|--------|--------|--------|--------|--------|--------|--------|--------|--------|--------|--------|--------|--------|--------|--------|--------|--------|--------|--------|--------|--------|--------|--------|--------|--------|--------|--------|--------|--------|--------|--------|--------|--------|--------|--------|--------|--------|--------|--------|--------|--------|--------|--------|--------|--------|--------|--------|--------|--------|--------|--------|--------|--------|--------|--------|--------|--------|--------|--------|--------|--------|--------|--------|--------|--------|--------|--------|--------|--------|--------|--------|--------|--------|--------|--------|--------|--------|--------|--------|--------|--------|--------|--------|--------|--------|--------|--------|--------|--------|--------|--------|--------|--------|--------|--------|--------|--------|--------|--------|--------|--------|--------|--------|--------|--------|--------|--------|--------|--------|--------|--------|--------|--------|--------|--------|--------|--------|--------|--------|--------|--------|--------|--------|--------|--------|--------|--------|--------|--------|--------|--------|--------|--------|--------|--------|--------|--------|--------|--------|--------|--------|--------|--------|--------|--------|--------|--------|--------|--------|--------|--------|--------|--------|--------|--------|--------|--------|--------|--------|--------|--------|--------|--------|--------|--------|--------|--------|--------|--------|--------|--------|--------|--------|--------|--------|--------|--------|--------|--------|--------|--------|--------|--------|--------|--------|--------|--------|--------|--------|--------|--------|--------|--------|--------|--------|--------|--------|--------|--------|--------|--------|--------|--------|--------|--------|--------|--------|--------|--------|--------|--------|--------|--------|--------|--------|--------|--------|--------|--------|--------|--------|--------|--------|--------|--------|--------|--------|--------|--------|--------|--------|--------|--------|--------|--------|--------|--------|--------|--------|--------|--------|--------|--------|--------|--------|--------|--------|--------|--------|--------|--------|--------|--------|--------|--------|--------|--------|--------|--------|--------|--------|--------|--------|--------|--------|--------|--------|--------|--------|--------|--------|--------|--------|--------|--------|--------|--------|--------|--------|--------|--------|
| LC50 | 2.9 | 2.8 | 2.5 | 2.3 | 2.9 | 3.4 | 3.9 | 4.5 | 3.1 | 3.6 | 3.9 | 4.5 | 3.5 | 4.5 | 4.0 | 4.5 | 4.1 | 3.6 | 4.4 | 4.7 | 5.3 | 6.2 | 6.3 | 7.2 | 8.1 | 8.8 | 9.6 | 10.2 | 11.1 | 11.9 | 12.8 | 13.8 | 14.9 | 16.0 | 17.2 | 18.6 | 20.0 | 21.5 | 23.0 | 24.6 | 26.3 | 28.0 | 29.9 | 31.8 | 33.8 | 35.8 | 37.9 | 40.0 | 42.1 | 44.4 | 46.7 | 49.2 | 51.7 | 54.3 | 56.9 | 59.6 | 62.4 | 65.1 | 67.9 | 70.7 | 73.5 | 76.4 | 79.2 | 82.1 | 84.9 | 87.8 | 90.7 | 93.6 | 96.5 | 99.4 | 102.3 | 105.2 | 108.1 | 111.0 | 113.9 | 116.8 | 119.7 | 122.6 | 125.5 | 128.4 | 131.3 | 134.2 | 137.1 | 140.0 | 142.9 | 145.8 | 148.7 | 151.6 | 154.5 | 157.4 | 160.3 | 163.2 | 166.1 | 169.0 | 171.9 | 174.8 | 177.7 | 180.6 | 183.5 | 186.4 | 189.3 | 192.2 | 195.1 | 198.0 | 200.9 | 203.8 | 206.7 | 209.6 | 212.5 | 215.4 | 218.3 | 221.2 | 224.1 | 227.0 | 229.9 | 232.8 | 235.7 | 238.6 | 241.5 | 244.4 | 247.3 | 250.2 | 253.1 | 256.0 | 258.9 | 261.8 | 264.7 | 267.6 | 270.5 | 273.4 | 276.3 | 279.2 | 282.1 | 285.0 | 287.9 | 290.8 | 293.7 | 296.6 | 299.5 | 302.4 | 305.3 | 308.2 | 311.1 | 314.0 | 316.9 | 319.8 | 322.7 | 325.6 | 328.5 | 331.4 | 334.3 | 337.2 | 340.1 | 343.0 | 345.9 | 348.8 | 351.7 | 354.6 | 357.5 | 360.4 | 363.3 | 366.2 | 369.1 | 372.0 | 374.9 | 377.8 | 380.7 | 383.6 | 386.5 | 389.4 | 392.3 | 395.2 | 398.1 | 401.0 | 403.9 | 406.8 | 409.7 | 412.6 | 415.5 | 418.4 | 421.3 | 424.2 | 427.1 | 430.0 | 432.9 | 435.8 | 438.7 | 441.6 | 444.5 | 447.4 | 450.3 | 453.2 | 456.1 | 459.0 | 461.9 | 464.8 | 467.7 | 470.6 | 473.5 | 476.4 | 479.3 | 482.2 | 485.1 | 488.0 | 490.9 | 493.8 | 496.7 | 499.6 | 502.5 | 505.4 | 508.3 | 511.2 | 514.1 | 517.0 | 519.9 | 522.8 | 525.7 | 528.6 | 531.5 | 534.4 | 537.3 | 540.2 | 543.1 | 546.0 | 548.9 | 551.8 | 554.7 | 557.6 | 560.5 | 563.4 | 566.3 | 569.2 | 572.1 | 575.0 | 577.9 | 580.8 | 583.7 | 586.6 | 589.5 | 592.4 | 595.3 | 598.2 | 601.1 | 604.0 | 606.9 | 609.8 | 612.7 | 615.6 | 618.5 | 621.4 | 624.3 | 627.2 | 630.1 | 633.0 | 635.9 | 638.8 | 641.7 | 644.6 | 647.5 | 650.4 | 653.3 | 656.2 | 659.1 | 662.0 | 664.9 | 667.8 | 670.7 | 673.6 | 676.5 | 679.4 | 682.3 | 685.2 | 688.1 | 691.0 | 693.9 | 696.8 | 699.7 | 702.6 | 705.5 | 708.4 | 711.3 | 714.2 | 717.1 | 720.0 | 722.9 | 725.8 | 728.7 | 731.6 | 734.5 | 737.4 | 740.3 | 743.2 | 746.1 | 749.0 | 751.9 | 754.8 | 757.7 | 760.6 | 763.5 | 766.4 | 769.3 | 772.2 | 775.1 | 778.0 | 780.9 | 783.8 | 786.7 | 789.6 | 792.5 | 795.4 | 798.3 | 801.2 | 804.1 | 807.0 | 809.9 | 812.8 | 815.7 | 818.6 | 821.5 | 824.4 | 827.3 | 830.2 | 833.1 | 836.0 | 838.9 | 841.8 | 844.7 | 847.6 | 850.5 | 853.4 | 856.3 | 859.2 | 862.1 | 865.0 | 867.9 | 870.8 | 873.7 | 876.6 | 879.5 | 882.4 | 885.3 | 888.2 | 891.1 | 894.0 | 896.9 | 899.8 | 902.7 | 905.6 | 908.5 | 911.4 | 914.3 | 917.2 | 920.1 | 923.0 | 925.9 | 928.8 | 931.7 | 934.6 | 937.5 | 940.4 | 943.3 | 946.2 | 949.1 | 952.0 | 954.9 | 957.8 | 960.7 | 963.6 | 966.5 | 969.4 | 972.3 | 975.2 | 978.1 | 981.0 | 983.9 | 986.8 | 989.7 | 992.6 | 995.5 | 998.4 | 1001.3 | 1004.2 | 1007.1 | 1010.0 | 1012.9 | 1015.8 | 1018.7 | 1021.6 | 1024.5 | 1027.4 | 1030.3 | 1033.2 | 1036.1 | 1039.0 | 1041.9 | 1044.8 | 1047.7 | 1050.6 | 1053.5 | 1056.4 | 1059.3 | 1062.2 | 1065.1 | 1068.0 | 1070.9 | 1073.8 | 1076.7 | 1079.6 | 1082.5 | 1085.4 | 1088.3 | 1091.2 | 1094.1 | 1097.0 | 1099.9 | 1102.8 | 1105.7 | 1108.6 | 1111.5 | 1114.4 | 1117.3 | 1120.2 | 1123.1 | 1126.0 | 1128.9 | 1131.8 | 1134.7 | 1137.6 | 1140.5 | 1143.4 | 1146.3 | 1149.2 | 1152.1 | 1155.0 | 1157.9 | 1160.8 | 1163.7 | 1166.6 | 1169.5 | 1172.4 | 1175.3 | 1178.2 | 1181.1 | 1184.0 | 1186.9 | 1189.8 | 1192.7 | 1195.6 | 1198.5 | 1201.4 | 1204.3 | 1207.2 | 1210.1 | 1213.0 | 1215.9 | 1218.8 | 1221.7 | 1224.6 | 1227.5 | 1230.4 | 1233.3 | 1236.2 | 1239.1 | 1242.0 | 1244.9 | 1247.8 | 1250.7 | 1253.6 | 1256.5 | 1259.4 | 1262.3 | 1265.2 | 1268.1 | 1271.0 | 1273.9 | 1276.8 | 1279.7 | 1282.6 | 1285.5 | 1288.4 | 1291.3 | 1294.2 | 1297.1 | 1300.0 | 1302.9 | 1305.8 | 1308.7 | 1311.6 | 1314.5 | 1317.4 | 1320.3 | 1323.2 | 1326.1 | 1329.0 | 1331.9 | 1334.8 | 1337.7 | 1340.6 | 1343.5 | 1346.4 | 1349.3 | 1352.2 | 1355.1 | 1358.0 | 1360.9 | 1363.8 | 1366.7 | 1369.6 | 1372.5 | 1375.4 | 1378.3 | 1381.2 | 1384.1 | 1387.0 | 1389.9 | 1392.8 | 1395.7 | 1398.6 | 1401.5 | 1404.4 | 1407.3 | 1410.2 | 1413.1 | 1416.0 | 1418.9 | 1421.8 | 1424.7 | 1427.6 | 1430.5 | 1433.4 | 1436.3 | 1439.2 | 1442.1 | 1445.0 | 1447.9 | 1450.8 | 1453.7 | 1456.6 | 1459.5 | 1462.4 | 1465.3 | 1468.2 | 1471.1 | 1474.0 | 1476.9 | 1479.8 | 1482.7 | 1485.6 | 1488.5 | 1491.4 | 1494.3 | 1497.2 | 1499.6 | 1501.5 | 1503.4 | 1505.3 | 1507.2 | 1509.1 | 1511.0 | 1512.9 | 1514.8 | 1516.7 | 1518.6 | 1520.5 | 1522.4 | 1524.3 | 1526.2 | 1528.1 | 1530.0 | 1531.9 | 1533.8 | 1535.7 | 1537.6 | 1539.5 | 1541.4 | 1543.3 | 1545.2 | 1547.1 | 1549.0 | 1550.9 | 1552.8 | 1554.7 | 1556.6 | 1558.5 | 1560.4 | 1562.3 | 1564.2 | 1566.1 | 1568.0 | 1569.9 | 1571.8 | 1573.7 | 1575.6 | 1577.5 | 1579.4 | 1581.3 | 1583.2 | 1585.1 | 1587.0 | 1588.9 | 1590.8 | 1592.7 | 1594.6 | 1596.5 | 1598.4 | 1600.3 | 1602.2 | 1604.1 | 1606.0 | 1607.9 | 1609.8 | 1611.7 | 1613.6 | 1615.5 | 1617.4 | 1619.3 | 1621.2 | 1623.1 | 1625.0 | 1626.9 | 1628.8 | 1630.7 | 1632.6 | 1634.5 | 1636.4 | 1638.3 | 1640.2 | 1642.1 | 1644.0 | 1645.9 | 1647.8 | 1649.7 | 1651.6 | 1653.5 | 1655.4 | 1657.3 | 1659.2 | 1661.1 | 1663.0 | 1664.9 | 1666.8 | 1668.7 | 1670.6 | 1672.5 | 1674.4 | 1676.3 | 1678.2 | 1680.1 | 1682.0 | 1683.9 | 1685.8 | 1687.7 | 1689.6 | 1691.5 | 1693.4 | 1695.3 | 1697.2 | 1699.1 | 1701.0 | 1702.9 | 1704.8 | 1706.7 | 1708.6 | 1710.5 | 1712.4 | 1714.3 | 1716.2 | 1718.1 | 1720.0 | 1721.9 | 1723.8 | 1725.7 | 1727.6 | 1729.5 | 1731.4 | 1733.3 | 1735.2 | 1737.1 | 1739.0 | 1740.9 | 1742.8 | 1744.7 | 1746.6 | 1748.5 | 1750.4 | 1752.3 | 1754.2 | 1756.1 | 1758.0 | 1759.9 | 1761.8 | 1763.7 | 1765.6 | 1767.5 | 1769.4 | 1771.3 | 1773.2 | 1775.1 | 1777.0 | 1778.9 | 1780.8 | 1782.7 | 1784.6 | 1786.5 | 1788.4 | 1790.3 | 1792.2 | 1794.1 | 1796.0 | 1797.9 | 1799.8 | 1801.7 | 1803.6 | 1805.5 | 1807.4 | 1809.3 | 1811.2 | 1813.1 | 1815.0 | 1816.9 | 1818.8 | 1820.7 | 1822.6 | 1824.5 | 1826.4 | 1828.3 | 1830.2 | 1832.1 | 1834.0 | 1835.9 | 1837.8 | 1839.7 | 1841.6 | 1843.5 | 1845.4 | 1847.3 | 1849.2 | 1851.1 | 1853.0 | 1854.9 | 1856.8 | 1858.7 | 1860.6 | 1862.5 | 1864.4 | 1866.3 | 1868.2 | 1870.1 | 1872.0 | 1873.9 | 1875.8 | 1877.7 | 1879.6 | 1881.5 | 1883.4 | 1885.3 | 1887.2 | 1889.1 | 1891.0 | 1892.9 | 1894.8 | 1896.7 | 1898.6 | 1900.5 | 1902.4 | 1904.3 | 1906.2 | 1908.1 | 1910.0 | 1911.9 | 1913.8 | 1915.7 | 1917.6 | 1919.5 | 1921.4 | 1923.3 | 1925.2 | 1927.1 | 1929.0 | 1930.9 | 1932.8 | 1934.7 | 1936.6 | 1938.5 | 1940.4 | 1942.3 | 1944.2 | 1946.1 | 1948.0 | 1949.9 | 1951.8 | 1953.7 | 1955.6 | 1957.5 | 1959.4 | 1961.3 | 1963.2 | 1965.1 | 1967.0 | 1968.9 | 1970.8 | 1972.7 | 1974.6 | 1976.5 | 1978.4 | 1980.3 | 1982.2 | 1984.1 | 1986.0 | 1987.9 | 1989.8 | 1991.7 | 1993.6 | 1995.5 | 1997.4 | 1999.3 | 2001.2 | 2003.1 | 2005.0 | 2006.9 | 2008.8 | 2010.7 | 2012.6 | 2014.5 | 2016.4 | 2018.3 | 2020.2 | 2022.1 | 2024.0 | 2025.9 | 2027.8 | 2029.7 | 2031.6 | 2033.5 | 2035.4 | 2037.3 | 2039.2 | 2041.1 | 2043.0 | 2044.9 | 2046.8 | 2048.7 | 2050.6 | 2052.5 | 2054.4 | 2056.3 | 2058.2 | 2060.1 | 2062.0 | 2063.9 | 2065.8 | 2067.7 | 2069.6 | 2071.5 | 2073.4 | 2075.3 | 2077.2 | 2079.1 | 2081.0 | 2082.9 | 2084.8 | 2086.7 | 2088.6 | 2090.5 | 2092.4 | 2094.3 | 2096.2 | 2098.1 | 2099.6 | 2101.5 | 2103.4 | 2105.3 | 2107.2 | 2109.1 | 2111.0 | 2112.9 | 2114.8 | 2116.7 | 2118.6 | 2120.5 | 2122.4 | 2124.3 | 2126.2 | 2128.1 | 2129.6 | 2131.5 | 2133.4 | 2135.3 | 2137.2 | 2139.1 | 2141.0 | 2142.9 | 2144.8 | 2146.7 | 2148.6 | 2150.5 | 2152.4 | 2154.3 | 2156.2 | 2158.1 | 2159.6 | 2161.5 | 2163.4 | 2165.3 | 2167.2 | 2169.1 | 2171.0 | 2172.9 | 2174.8 | 2176.7 | 2178.6 | 2180.5 | 2182.4 | 2184.3 | 2186.2 | 2188.1 | 2189.6 | 2191.5 | 2193.4 | 2195.3 | 2197.2 | 2199.1 | 2201.0 | 2202.9 | 2204.8 | 2206.7 | 2208.6 | 2210.5 | 2212.4 | 2214.3 | 2216.2 | 2218.1 | 2219.6 | 2221.5 | 2223.4 | 2225.3 | 2227.2 | 2229.1 | 2231.0 | 2232.9 | 2234.8 | 2236.7 | 2238.6 | 2240.5 | 2242.4 | 2244.3 | 2246.2 | 2248.1 | 2249.6 | 2251.5 | 2253.4 | 2255.3 | 2257.2 | 2259.1 | 2261.0 | 2262.9 | 2264.8 | 2266.7 | 2268.6 | 2270.5 | 2272.4 | 2274.3 | 2276.2 | 2278.1 | 2279.6 | 2281.5 | 2283.4 | 2285.3 | 2287.2 | 2289.1 | 2291.0 | 2292.9 | 2294.8 | 2296.7 | 2298.6 | 2300.5 | 2302.4 | 2304.3 | 2306.2 | 2308.1 | 2309.6 | 2311.5 | 2313.4 | 2315.3 | 2317.2 | 2319.1 | 2321.0 | 2322.9 | 2324.8 | 2326.7 | 2328.6 | 2330.5 | 2332.4 | 2334.3 | 2336.2 | 2338.1 | 2339.6 | 2341.5 | 2343.4 | 2345.3 | 2347.2 | 2349.1 | 2351.0 | 2352.9 | 2354.8 | 2356.7 | 2358.6 | 2360.5 | 2362.4 | 2364.3 | 2366.2 | 2368.1 | 2369.6 | 2371.5 | 2373.4 | 2375.3 | 2377.2 | 2379.1 | 2381.0 | 2382.9 | 2384.8 | 2386.7 | 2388.6 | 2390.5 | 2392.4 | 2394.3 | 2396.2 | 2398.1 | 2399.6 | 2401.5 | 2403.4 | 2405.3 | 2407.2 | 2409.1 | 2411.0 | 2412.9 | 2414.8 | 2416.7 | 2418.6 | 2420.5 | 2422.4 | 2424.3 | 2426.2 | 2428.1 | 2429.6 | 2431.5 | 2433.4 | 2435.3 | 2437.2 | 2439.1 | 2441.0 | 2442.9 | 2444.8 | 2446.7 | 2448.6 | 2450.5 | 2452.4 | 2454.3 | 2456.2 | 2458.1 | 2459.6 | 2461.5 | 2463.4 | 2465.3 | 2467.2 | 2469.1 | 2471.0 | 2472.9 | 2474.8 | 2476.7 | 2478.6 | 2480.5 | 2482.4 | 2484.3 | 2486.2 | 2488.1 | 2489.6 | 2491.5 | 2493.4 | 2495.3 | 2497.2 | 2499.1 | 2501.0 | 2502.9 | 2504.8 | 2506.7 | 2508.6 | 2510.5 | 2512.4 | 2514.3 | 2516.2 | 2518.1 | 2519.6 | 2521.5 | 2523.4 | 2525.3 | 2527.2 | 2529.1 | 2531.0 | 2532.9 | 2534.8 | 2536.7 | 2538.6 | 2540.5 | 2542.4 | 2544.3 | 2546.2 | 2548.1 | 2549.6 | 2551.5 | 2553.4 | 2555.3 | 2557.2 | 2559.1 | 2561.0 | 2562.9 | 2564.8 | 2566.7 | 2568.6 | 2570.5 | 2572.4 | 2574.3 | 2576.2 | 2578.1 | 2579.6 | 2581.5 | 2583.4 | 2585.3 | 2587.2 | 2589.1 | 2591.0 | 2592.9 | 2594.8 | 2596.7 | 2598.6 | 2600.5 | 2602.4 | 2604.3 | 2606.2 | 2608.1 | 2609.6 | 2611.5 | 2613.4 | 2615.3 | 2617.2 | 2619.1 | 2621.0 | 2622.9 | 2624.8 | 2626.7 | 2628.6 | 2630.5 | 2632.4 | 2634.3 | 2636.2 | 2638.1 | 2639.6 | 2641.5 | 2643.4 | 2645.3 | 2647.2 | 2649.1 | 2651.0 | 2652.9 | 2654.8 |
|------|-----|-----|-----|-----|-----|-----|-----|-----|-----|-----|-----|-----|-----|-----|-----|-----|-----|-----|-----|-----|-----|-----|-----|-----|-----|-----|-----|------|------|------|------|------|------|------|------|------|------|------|------|------|------|------|------|------|------|------|------|------|------|------|------|------|------|------|------|------|------|------|------|------|------|------|------|------|------|------|------|------|------|------|-------|-------|-------|-------|-------|-------|-------|-------|-------|-------|-------|-------|-------|-------|-------|-------|-------|-------|-------|-------|-------|-------|-------|-------|-------|-------|-------|-------|-------|-------|-------|-------|-------|-------|-------|-------|-------|-------|-------|-------|-------|-------|-------|-------|-------|-------|-------|-------|-------|-------|-------|-------|-------|-------|-------|-------|-------|-------|-------|-------|-------|-------|-------|-------|-------|-------|-------|-------|-------|-------|-------|-------|-------|-------|-------|-------|-------|-------|-------|-------|-------|-------|-------|-------|-------|-------|-------|-------|-------|-------|-------|-------|-------|-------|-------|-------|-------|-------|-------|-------|-------|-------|-------|-------|-------|-------|-------|-------|-------|-------|-------|-------|-------|-------|-------|-------|-------|-------|-------|-------|-------|-------|-------|-------|-------|-------|-------|-------|-------|-------|-------|-------|-------|-------|-------|-------|-------|-------|-------|-------|-------|-------|-------|-------|-------|-------|-------|-------|-------|-------|-------|-------|-------|-------|-------|-------|-------|-------|-------|-------|-------|-------|-------|-------|-------|-------|-------|-------|-------|-------|-------|-------|-------|-------|-------|-------|-------|-------|-------|-------|-------|-------|-------|-------|-------|-------|-------|-------|-------|-------|-------|-------|-------|-------|-------|-------|-------|-------|-------|-------|-------|-------|-------|-------|-------|-------|-------|-------|-------|-------|-------|-------|-------|-------|-------|-------|-------|-------|-------|-------|-------|-------|-------|-------|-------|-------|-------|-------|-------|-------|-------|-------|-------|-------|-------|-------|-------|-------|-------|-------|-------|-------|-------|-------|-------|-------|-------|-------|-------|-------|-------|-------|-------|-------|-------|-------|-------|-------|-------|-------|-------|-------|-------|-------|-------|-------|-------|-------|-------|-------|-------|-------|-------|-------|-------|-------|-------|-------|-------|-------|-------|-------|-------|-------|-------|-------|-------|-------|-------|-------|-------|-------|-------|-------|-------|-------|-------|-------|-------|-------|-------|-------|-------|-------|-------|-------|-------|-------|-------|-------|--------|--------|--------|--------|--------|--------|--------|--------|--------|--------|--------|--------|--------|--------|--------|--------|--------|--------|--------|--------|--------|--------|--------|--------|--------|--------|--------|--------|--------|--------|--------|--------|--------|--------|--------|--------|--------|--------|--------|--------|--------|--------|--------|--------|--------|--------|--------|--------|--------|--------|--------|--------|--------|--------|--------|--------|--------|--------|--------|--------|--------|--------|--------|--------|--------|--------|--------|--------|--------|--------|--------|--------|--------|--------|--------|--------|--------|--------|--------|--------|--------|--------|--------|--------|--------|--------|--------|--------|--------|--------|--------|--------|--------|--------|--------|--------|--------|--------|--------|--------|--------|--------|--------|--------|--------|--------|--------|--------|--------|--------|--------|--------|--------|--------|--------|--------|--------|--------|--------|--------|--------|--------|--------|--------|--------|--------|--------|--------|--------|--------|--------|--------|--------|--------|--------|--------|--------|--------|--------|--------|--------|--------|--------|--------|--------|--------|--------|--------|--------|--------|--------|--------|--------|--------|--------|--------|--------|--------|--------|--------|--------|--------|--------|--------|--------|--------|--------|--------|--------|--------|--------|--------|--------|--------|--------|--------|--------|--------|--------|--------|--------|--------|--------|--------|--------|--------|--------|--------|--------|--------|--------|--------|--------|--------|--------|--------|--------|--------|--------|--------|--------|--------|--------|--------|--------|--------|--------|--------|--------|--------|--------|--------|--------|--------|--------|--------|--------|--------|--------|--------|--------|--------|--------|--------|--------|--------|--------|--------|--------|--------|--------|--------|--------|--------|--------|--------|--------|--------|--------|--------|--------|--------|--------|--------|--------|--------|--------|--------|--------|--------|--------|--------|--------|--------|--------|--------|--------|--------|--------|--------|--------|--------|--------|--------|--------|--------|--------|--------|--------|--------|--------|--------|--------|--------|--------|--------|--------|--------|--------|--------|--------|--------|--------|--------|--------|--------|--------|--------|--------|--------|--------|--------|--------|--------|--------|--------|--------|--------|--------|--------|--------|--------|--------|--------|--------|--------|--------|--------|--------|--------|--------|--------|--------|--------|--------|--------|--------|--------|--------|--------|--------|--------|--------|--------|--------|--------|--------|--------|--------|--------|--------|--------|--------|--------|--------|--------|--------|--------|--------|--------|--------|--------|--------|--------|--------|--------|--------|--------|--------|--------|--------|--------|--------|--------|--------|--------|--------|--------|--------|--------|--------|--------|--------|--------|--------|--------|--------|--------|--------|--------|--------|--------|--------|--------|--------|--------|--------|--------|--------|--------|--------|--------|--------|--------|--------|--------|--------|--------|--------|--------|--------|--------|--------|--------|--------|--------|--------|--------|--------|--------|--------|--------|--------|--------|--------|--------|--------|--------|--------|--------|--------|--------|--------|--------|--------|--------|--------|--------|--------|--------|--------|--------|--------|--------|--------|--------|--------|--------|--------|--------|--------|--------|--------|--------|--------|--------|--------|--------|--------|--------|--------|--------|--------|--------|--------|--------|--------|--------|--------|--------|--------|--------|--------|--------|--------|--------|--------|--------|--------|--------|--------|--------|--------|--------|--------|--------|--------|--------|--------|--------|--------|--------|--------|--------|--------|--------|--------|--------|--------|--------|--------|--------|--------|--------|--------|--------|--------|--------|--------|--------|--------|--------|--------|--------|--------|--------|--------|--------|--------|--------|--------|--------|--------|--------|--------|--------|--------|--------|--------|--------|--------|--------|--------|--------|--------|--------|--------|--------|--------|--------|--------|--------|--------|--------|--------|--------|--------|--------|--------|--------|--------|--------|--------|--------|--------|--------|--------|--------|--------|--------|--------|--------|--------|--------|--------|--------|--------|--------|--------|--------|--------|--------|--------|--------|--------|--------|--------|--------|--------|--------|--------|--------|--------|--------|--------|--------|--------|--------|--------|--------|--------|--------|--------|--------|--------|--------|--------|--------|--------|--------|--------|--------|--------|--------|--------|--------|--------|--------|--------|--------|--------|--------|--------|--------|--------|--------|--------|--------|--------|--------|--------|--------|--------|--------|--------|--------|--------|--------|--------|--------|--------|--------|--------|--------|--------|--------|--------|--------|--------|--------|--------|--------|--------|--------|--------|--------|--------|--------|--------|--------|--------|--------|--------|--------|--------|--------|--------|--------|--------|--------|--------|--------|--------|--------|--------|--------|--------|--------|--------|--------|--------|--------|--------|--------|--------|--------|--------|--------|--------|--------|--------|--------|--------|--------|--------|--------|--------|--------|--------|--------|--------|--------|--------|--------|--------|--------|--------|--------|--------|--------|--------|--------|--------|--------|--------|--------|--------|--------|--------|--------|--------|--------|--------|--------|--------|--------|--------|--------|--------|--------|--------|--------|--------|--------|--------|--------|--------|--------|--------|--------|--------|--------|--------|--------|--------|--------|--------|--------|--------|--------|--------|--------|--------|--------|--------|--------|--------|--------|--------|--------|--------|--------|--------|--------|--------|--------|--------|--------|--------|--------|--------|--------|--------|--------|--------|--------|--------|--------|--------|--------|--------|--------|--------|--------|--------|--------|--------|--------|--------|--------|--------|--------|--------|--------|--------|--------|--------|--------|--------|--------|--------|--------|--------|--------|--------|--------|--------|--------|--------|--------|--------|--------|--------|--------|--------|











Table with columns for country codes (e.g., NCA, NEP, NER) and a grid of numerical data points for each country.



|       |     |      |      |      |      |      |      |      |      |      |      |      |      |      |      |      |      |      |      |      |      |      |      |      |      |      |      |      |      |      |      |      |      |      |      |      |      |      |      |      |      |      |      |      |      |      |      |      |      |      |      |      |      |      |      |      |      |      |      |      |      |      |      |      |      |      |      |      |      |      |      |      |      |      |      |      |      |      |      |      |      |      |      |      |      |      |      |      |      |      |      |      |      |      |      |      |      |      |      |      |      |       |       |       |       |       |       |       |       |       |       |       |       |       |       |       |       |       |       |       |       |       |       |       |       |       |       |       |       |       |       |       |       |       |       |       |       |       |       |       |       |       |       |       |       |       |       |       |       |       |       |       |       |       |       |       |       |       |       |       |       |       |       |       |       |       |       |       |       |       |       |       |       |       |       |       |       |       |       |       |       |       |       |       |       |       |       |       |       |       |       |       |       |       |       |       |       |       |       |       |       |       |       |       |       |       |       |       |       |       |       |       |       |       |       |       |       |       |       |       |       |       |       |       |       |       |       |       |       |       |       |       |       |       |       |       |       |       |       |       |       |       |       |       |       |       |       |       |       |       |       |       |       |       |       |       |       |       |       |       |       |       |       |       |       |       |       |       |       |       |       |       |       |       |       |       |       |       |       |       |       |       |       |       |       |       |       |       |       |       |       |       |       |       |       |       |       |       |       |       |       |       |       |       |       |       |       |       |       |       |       |       |       |       |       |       |       |       |       |       |       |       |       |       |       |       |       |       |       |       |       |       |       |       |       |       |       |       |       |       |       |       |       |       |       |       |       |       |       |       |       |       |       |       |       |       |       |       |       |       |       |       |       |       |       |       |       |       |       |       |       |       |       |       |       |       |       |       |       |       |       |       |       |       |       |       |       |       |       |       |       |       |       |       |       |       |       |       |       |       |       |       |       |       |       |       |       |       |       |       |       |       |       |       |       |       |       |       |       |       |       |       |       |       |       |       |       |       |       |       |       |       |       |       |       |       |       |       |       |       |       |       |       |       |       |       |       |       |       |       |       |       |       |       |       |       |       |       |       |       |       |       |       |       |       |       |       |       |       |       |       |       |       |       |       |       |       |       |       |       |       |       |       |       |       |       |       |       |       |       |       |       |       |       |       |       |       |       |       |       |       |       |       |       |       |       |       |       |       |       |       |       |       |       |       |       |       |       |       |       |       |       |       |       |       |       |       |       |       |       |       |       |       |       |       |       |       |       |       |       |       |       |       |       |       |       |       |       |       |       |       |       |       |       |       |       |       |       |       |       |       |       |       |       |       |       |       |       |       |       |       |       |       |       |       |       |       |       |       |       |       |       |       |       |       |       |       |       |       |       |       |       |       |       |       |       |       |       |       |       |       |       |       |       |       |       |       |       |       |       |       |       |       |       |       |       |       |       |       |       |       |       |       |       |       |       |       |       |       |       |       |       |       |       |       |       |       |       |       |       |       |       |       |       |       |       |       |       |       |       |       |       |       |       |       |       |       |       |       |       |       |       |       |       |       |       |       |       |       |       |       |       |       |       |       |       |       |       |       |       |       |       |       |       |       |       |       |       |       |       |       |       |       |       |       |       |       |       |       |       |       |       |       |       |       |       |       |       |       |       |       |       |       |       |       |       |       |       |       |       |       |       |       |       |       |       |       |       |       |       |       |       |       |       |       |       |       |       |       |       |       |       |       |       |       |       |       |       |       |       |       |       |       |       |       |       |       |       |       |       |       |       |       |       |       |       |       |       |       |       |       |       |       |       |       |       |       |       |       |       |       |       |       |       |       |       |       |       |       |       |       |       |       |       |       |       |       |       |       |       |       |       |       |       |       |       |       |       |       |       |       |       |       |       |       |       |       |       |       |       |       |       |       |       |       |       |       |       |       |       |       |       |       |       |       |       |       |       |       |       |       |       |       |       |       |       |       |       |       |       |       |       |       |       |       |       |       |       |       |       |       |       |       |       |       |       |       |       |       |       |       |       |       |       |       |       |       |       |       |       |       |       |       |       |       |       |       |       |       |       |       |       |       |       |       |       |       |       |       |       |       |       |       |       |       |       |       |       |       |       |       |       |       |       |       |       |       |       |       |       |       |       |       |       |       |       |       |       |       |       |       |       |       |       |       |       |       |       |       |       |       |       |       |       |       |       |       |       |       |       |       |       |       |       |       |       |       |       |       |       |       |       |       |       |       |       |       |       |       |       |       |       |       |       |       |       |       |       |       |       |       |       |       |       |       |       |       |       |       |       |       |       |       |       |       |       |       |       |       |       |       |       |       |       |       |       |       |       |       |       |       |       |       |       |       |       |       |       |       |       |       |       |       |       |       |       |       |       |       |       |       |       |       |       |       |       |       |       |       |       |       |       |       |       |       |       |       |       |       |       |       |       |       |       |       |       |       |       |       |       |       |       |       |       |       |       |       |       |       |       |       |       |       |       |       |       |       |       |       |       |       |       |       |       |       |       |       |       |       |       |       |       |       |       |       |       |       |       |       |       |       |        |        |        |        |        |        |        |        |        |        |        |        |        |        |        |        |        |        |        |        |        |        |        |        |        |        |        |        |        |        |        |        |        |        |        |        |        |        |        |        |        |        |        |        |        |        |        |        |        |        |        |        |        |        |        |        |        |        |        |        |        |        |        |        |        |        |        |        |        |        |        |        |        |        |        |        |        |        |        |        |        |        |        |        |        |        |        |        |        |        |        |        |        |        |        |        |        |        |        |        |        |        |        |        |        |        |        |        |        |        |        |        |        |        |        |        |        |        |        |        |        |        |        |        |        |        |        |        |        |        |       |
|-------|-----|------|------|------|------|------|------|------|------|------|------|------|------|------|------|------|------|------|------|------|------|------|------|------|------|------|------|------|------|------|------|------|------|------|------|------|------|------|------|------|------|------|------|------|------|------|------|------|------|------|------|------|------|------|------|------|------|------|------|------|------|------|------|------|------|------|------|------|------|------|------|------|------|------|------|------|------|------|------|------|------|------|------|------|------|------|------|------|------|------|------|------|------|------|------|------|------|------|------|------|------|-------|-------|-------|-------|-------|-------|-------|-------|-------|-------|-------|-------|-------|-------|-------|-------|-------|-------|-------|-------|-------|-------|-------|-------|-------|-------|-------|-------|-------|-------|-------|-------|-------|-------|-------|-------|-------|-------|-------|-------|-------|-------|-------|-------|-------|-------|-------|-------|-------|-------|-------|-------|-------|-------|-------|-------|-------|-------|-------|-------|-------|-------|-------|-------|-------|-------|-------|-------|-------|-------|-------|-------|-------|-------|-------|-------|-------|-------|-------|-------|-------|-------|-------|-------|-------|-------|-------|-------|-------|-------|-------|-------|-------|-------|-------|-------|-------|-------|-------|-------|-------|-------|-------|-------|-------|-------|-------|-------|-------|-------|-------|-------|-------|-------|-------|-------|-------|-------|-------|-------|-------|-------|-------|-------|-------|-------|-------|-------|-------|-------|-------|-------|-------|-------|-------|-------|-------|-------|-------|-------|-------|-------|-------|-------|-------|-------|-------|-------|-------|-------|-------|-------|-------|-------|-------|-------|-------|-------|-------|-------|-------|-------|-------|-------|-------|-------|-------|-------|-------|-------|-------|-------|-------|-------|-------|-------|-------|-------|-------|-------|-------|-------|-------|-------|-------|-------|-------|-------|-------|-------|-------|-------|-------|-------|-------|-------|-------|-------|-------|-------|-------|-------|-------|-------|-------|-------|-------|-------|-------|-------|-------|-------|-------|-------|-------|-------|-------|-------|-------|-------|-------|-------|-------|-------|-------|-------|-------|-------|-------|-------|-------|-------|-------|-------|-------|-------|-------|-------|-------|-------|-------|-------|-------|-------|-------|-------|-------|-------|-------|-------|-------|-------|-------|-------|-------|-------|-------|-------|-------|-------|-------|-------|-------|-------|-------|-------|-------|-------|-------|-------|-------|-------|-------|-------|-------|-------|-------|-------|-------|-------|-------|-------|-------|-------|-------|-------|-------|-------|-------|-------|-------|-------|-------|-------|-------|-------|-------|-------|-------|-------|-------|-------|-------|-------|-------|-------|-------|-------|-------|-------|-------|-------|-------|-------|-------|-------|-------|-------|-------|-------|-------|-------|-------|-------|-------|-------|-------|-------|-------|-------|-------|-------|-------|-------|-------|-------|-------|-------|-------|-------|-------|-------|-------|-------|-------|-------|-------|-------|-------|-------|-------|-------|-------|-------|-------|-------|-------|-------|-------|-------|-------|-------|-------|-------|-------|-------|-------|-------|-------|-------|-------|-------|-------|-------|-------|-------|-------|-------|-------|-------|-------|-------|-------|-------|-------|-------|-------|-------|-------|-------|-------|-------|-------|-------|-------|-------|-------|-------|-------|-------|-------|-------|-------|-------|-------|-------|-------|-------|-------|-------|-------|-------|-------|-------|-------|-------|-------|-------|-------|-------|-------|-------|-------|-------|-------|-------|-------|-------|-------|-------|-------|-------|-------|-------|-------|-------|-------|-------|-------|-------|-------|-------|-------|-------|-------|-------|-------|-------|-------|-------|-------|-------|-------|-------|-------|-------|-------|-------|-------|-------|-------|-------|-------|-------|-------|-------|-------|-------|-------|-------|-------|-------|-------|-------|-------|-------|-------|-------|-------|-------|-------|-------|-------|-------|-------|-------|-------|-------|-------|-------|-------|-------|-------|-------|-------|-------|-------|-------|-------|-------|-------|-------|-------|-------|-------|-------|-------|-------|-------|-------|-------|-------|-------|-------|-------|-------|-------|-------|-------|-------|-------|-------|-------|-------|-------|-------|-------|-------|-------|-------|-------|-------|-------|-------|-------|-------|-------|-------|-------|-------|-------|-------|-------|-------|-------|-------|-------|-------|-------|-------|-------|-------|-------|-------|-------|-------|-------|-------|-------|-------|-------|-------|-------|-------|-------|-------|-------|-------|-------|-------|-------|-------|-------|-------|-------|-------|-------|-------|-------|-------|-------|-------|-------|-------|-------|-------|-------|-------|-------|-------|-------|-------|-------|-------|-------|-------|-------|-------|-------|-------|-------|-------|-------|-------|-------|-------|-------|-------|-------|-------|-------|-------|-------|-------|-------|-------|-------|-------|-------|-------|-------|-------|-------|-------|-------|-------|-------|-------|-------|-------|-------|-------|-------|-------|-------|-------|-------|-------|-------|-------|-------|-------|-------|-------|-------|-------|-------|-------|-------|-------|-------|-------|-------|-------|-------|-------|-------|-------|-------|-------|-------|-------|-------|-------|-------|-------|-------|-------|-------|-------|-------|-------|-------|-------|-------|-------|-------|-------|-------|-------|-------|-------|-------|-------|-------|-------|-------|-------|-------|-------|-------|-------|-------|-------|-------|-------|-------|-------|-------|-------|-------|-------|-------|-------|-------|-------|-------|-------|-------|-------|-------|-------|-------|-------|-------|-------|-------|-------|-------|-------|-------|-------|-------|-------|-------|-------|-------|-------|-------|-------|-------|-------|-------|-------|-------|-------|-------|-------|-------|-------|-------|-------|-------|-------|-------|-------|-------|-------|-------|-------|-------|-------|-------|-------|-------|-------|-------|-------|-------|-------|-------|-------|-------|-------|-------|-------|-------|-------|-------|-------|-------|-------|-------|-------|-------|-------|-------|-------|-------|-------|-------|-------|-------|-------|-------|-------|-------|-------|-------|-------|-------|-------|-------|-------|-------|-------|-------|-------|-------|-------|-------|-------|-------|-------|-------|-------|-------|-------|-------|-------|-------|-------|-------|-------|-------|-------|-------|-------|-------|-------|-------|-------|-------|-------|-------|-------|-------|-------|-------|-------|-------|-------|-------|-------|-------|-------|-------|-------|-------|-------|-------|-------|-------|-------|-------|-------|-------|-------|-------|-------|-------|-------|-------|-------|-------|-------|-------|-------|-------|-------|-------|-------|-------|-------|-------|-------|-------|-------|-------|-------|-------|-------|-------|-------|-------|-------|-------|-------|-------|-------|-------|-------|-------|-------|-------|-------|-------|-------|-------|-------|-------|-------|-------|-------|-------|-------|-------|-------|-------|-------|-------|-------|-------|-------|-------|-------|-------|-------|-------|-------|-------|-------|-------|-------|-------|-------|-------|-------|-------|-------|-------|-------|-------|-------|-------|-------|-------|-------|-------|-------|-------|-------|-------|-------|-------|-------|-------|-------|-------|-------|-------|-------|-------|-------|-------|-------|-------|-------|-------|-------|-------|-------|-------|-------|-------|-------|-------|-------|-------|-------|-------|-------|-------|-------|-------|-------|-------|-------|-------|-------|-------|-------|-------|-------|-------|-------|-------|-------|-------|-------|-------|-------|-------|-------|-------|-------|-------|-------|-------|-------|-------|-------|-------|-------|-------|-------|-------|-------|-------|-------|--------|--------|--------|--------|--------|--------|--------|--------|--------|--------|--------|--------|--------|--------|--------|--------|--------|--------|--------|--------|--------|--------|--------|--------|--------|--------|--------|--------|--------|--------|--------|--------|--------|--------|--------|--------|--------|--------|--------|--------|--------|--------|--------|--------|--------|--------|--------|--------|--------|--------|--------|--------|--------|--------|--------|--------|--------|--------|--------|--------|--------|--------|--------|--------|--------|--------|--------|--------|--------|--------|--------|--------|--------|--------|--------|--------|--------|--------|--------|--------|--------|--------|--------|--------|--------|--------|--------|--------|--------|--------|--------|--------|--------|--------|--------|--------|--------|--------|--------|--------|--------|--------|--------|--------|--------|--------|--------|--------|--------|--------|--------|--------|--------|--------|--------|--------|--------|--------|--------|--------|--------|--------|--------|--------|--------|--------|--------|--------|--------|--------|-------|
| NUSPP | 9.8 | 10.5 | 11.4 | 12.3 | 13.2 | 14.1 | 15.0 | 15.9 | 16.8 | 17.7 | 18.6 | 19.5 | 20.4 | 21.3 | 22.2 | 23.1 | 24.0 | 24.9 | 25.8 | 26.7 | 27.6 | 28.5 | 29.4 | 30.3 | 31.2 | 32.1 | 33.0 | 33.9 | 34.8 | 35.7 | 36.6 | 37.5 | 38.4 | 39.3 | 40.2 | 41.1 | 42.0 | 42.9 | 43.8 | 44.7 | 45.6 | 46.5 | 47.4 | 48.3 | 49.2 | 50.1 | 51.0 | 51.9 | 52.8 | 53.7 | 54.6 | 55.5 | 56.4 | 57.3 | 58.2 | 59.1 | 60.0 | 60.9 | 61.8 | 62.7 | 63.6 | 64.5 | 65.4 | 66.3 | 67.2 | 68.1 | 69.0 | 69.9 | 70.8 | 71.7 | 72.6 | 73.5 | 74.4 | 75.3 | 76.2 | 77.1 | 78.0 | 78.9 | 79.8 | 80.7 | 81.6 | 82.5 | 83.4 | 84.3 | 85.2 | 86.1 | 87.0 | 87.9 | 88.8 | 89.7 | 90.6 | 91.5 | 92.4 | 93.3 | 94.2 | 95.1 | 96.0 | 96.9 | 97.8 | 98.7 | 99.6 | 100.5 | 101.4 | 102.3 | 103.2 | 104.1 | 105.0 | 105.9 | 106.8 | 107.7 | 108.6 | 109.5 | 110.4 | 111.3 | 112.2 | 113.1 | 114.0 | 114.9 | 115.8 | 116.7 | 117.6 | 118.5 | 119.4 | 120.3 | 121.2 | 122.1 | 123.0 | 123.9 | 124.8 | 125.7 | 126.6 | 127.5 | 128.4 | 129.3 | 130.2 | 131.1 | 132.0 | 132.9 | 133.8 | 134.7 | 135.6 | 136.5 | 137.4 | 138.3 | 139.2 | 140.1 | 141.0 | 141.9 | 142.8 | 143.7 | 144.6 | 145.5 | 146.4 | 147.3 | 148.2 | 149.1 | 150.0 | 150.9 | 151.8 | 152.7 | 153.6 | 154.5 | 155.4 | 156.3 | 157.2 | 158.1 | 159.0 | 159.9 | 160.8 | 161.7 | 162.6 | 163.5 | 164.4 | 165.3 | 166.2 | 167.1 | 168.0 | 168.9 | 169.8 | 170.7 | 171.6 | 172.5 | 173.4 | 174.3 | 175.2 | 176.1 | 177.0 | 177.9 | 178.8 | 179.7 | 180.6 | 181.5 | 182.4 | 183.3 | 184.2 | 185.1 | 186.0 | 186.9 | 187.8 | 188.7 | 189.6 | 190.5 | 191.4 | 192.3 | 193.2 | 194.1 | 195.0 | 195.9 | 196.8 | 197.7 | 198.6 | 199.5 | 200.4 | 201.3 | 202.2 | 203.1 | 204.0 | 204.9 | 205.8 | 206.7 | 207.6 | 208.5 | 209.4 | 210.3 | 211.2 | 212.1 | 213.0 | 213.9 | 214.8 | 215.7 | 216.6 | 217.5 | 218.4 | 219.3 | 220.2 | 221.1 | 222.0 | 222.9 | 223.8 | 224.7 | 225.6 | 226.5 | 227.4 | 228.3 | 229.2 | 230.1 | 231.0 | 231.9 | 232.8 | 233.7 | 234.6 | 235.5 | 236.4 | 237.3 | 238.2 | 239.1 | 240.0 | 240.9 | 241.8 | 242.7 | 243.6 | 244.5 | 245.4 | 246.3 | 247.2 | 248.1 | 249.0 | 249.9 | 250.8 | 251.7 | 252.6 | 253.5 | 254.4 | 255.3 | 256.2 | 257.1 | 258.0 | 258.9 | 259.8 | 260.7 | 261.6 | 262.5 | 263.4 | 264.3 | 265.2 | 266.1 | 267.0 | 267.9 | 268.8 | 269.7 | 270.6 | 271.5 | 272.4 | 273.3 | 274.2 | 275.1 | 276.0 | 276.9 | 277.8 | 278.7 | 279.6 | 280.5 | 281.4 | 282.3 | 283.2 | 284.1 | 285.0 | 285.9 | 286.8 | 287.7 | 288.6 | 289.5 | 290.4 | 291.3 | 292.2 | 293.1 | 294.0 | 294.9 | 295.8 | 296.7 | 297.6 | 298.5 | 299.4 | 300.3 | 301.2 | 302.1 | 303.0 | 303.9 | 304.8 | 305.7 | 306.6 | 307.5 | 308.4 | 309.3 | 310.2 | 311.1 | 312.0 | 312.9 | 313.8 | 314.7 | 315.6 | 316.5 | 317.4 | 318.3 | 319.2 | 320.1 | 321.0 | 321.9 | 322.8 | 323.7 | 324.6 | 325.5 | 326.4 | 327.3 | 328.2 | 329.1 | 330.0 | 330.9 | 331.8 | 332.7 | 333.6 | 334.5 | 335.4 | 336.3 | 337.2 | 338.1 | 339.0 | 339.9 | 340.8 | 341.7 | 342.6 | 343.5 | 344.4 | 345.3 | 346.2 | 347.1 | 348.0 | 348.9 | 349.8 | 350.7 | 351.6 | 352.5 | 353.4 | 354.3 | 355.2 | 356.1 | 357.0 | 357.9 | 358.8 | 359.7 | 360.6 | 361.5 | 362.4 | 363.3 | 364.2 | 365.1 | 366.0 | 366.9 | 367.8 | 368.7 | 369.6 | 370.5 | 371.4 | 372.3 | 373.2 | 374.1 | 375.0 | 375.9 | 376.8 | 377.7 | 378.6 | 379.5 | 380.4 | 381.3 | 382.2 | 383.1 | 384.0 | 384.9 | 385.8 | 386.7 | 387.6 | 388.5 | 389.4 | 390.3 | 391.2 | 392.1 | 393.0 | 393.9 | 394.8 | 395.7 | 396.6 | 397.5 | 398.4 | 399.3 | 400.2 | 401.1 | 402.0 | 402.9 | 403.8 | 404.7 | 405.6 | 406.5 | 407.4 | 408.3 | 409.2 | 410.1 | 411.0 | 411.9 | 412.8 | 413.7 | 414.6 | 415.5 | 416.4 | 417.3 | 418.2 | 419.1 | 420.0 | 420.9 | 421.8 | 422.7 | 423.6 | 424.5 | 425.4 | 426.3 | 427.2 | 428.1 | 429.0 | 429.9 | 430.8 | 431.7 | 432.6 | 433.5 | 434.4 | 435.3 | 436.2 | 437.1 | 438.0 | 438.9 | 439.8 | 440.7 | 441.6 | 442.5 | 443.4 | 444.3 | 445.2 | 446.1 | 447.0 | 447.9 | 448.8 | 449.7 | 450.6 | 451.5 | 452.4 | 453.3 | 454.2 | 455.1 | 456.0 | 456.9 | 457.8 | 458.7 | 459.6 | 460.5 | 461.4 | 462.3 | 463.2 | 464.1 | 465.0 | 465.9 | 466.8 | 467.7 | 468.6 | 469.5 | 470.4 | 471.3 | 472.2 | 473.1 | 474.0 | 474.9 | 475.8 | 476.7 | 477.6 | 478.5 | 479.4 | 480.3 | 481.2 | 482.1 | 483.0 | 483.9 | 484.8 | 485.7 | 486.6 | 487.5 | 488.4 | 489.3 | 490.2 | 491.1 | 492.0 | 492.9 | 493.8 | 494.7 | 495.6 | 496.5 | 497.4 | 498.3 | 499.2 | 500.1 | 501.0 | 501.9 | 502.8 | 503.7 | 504.6 | 505.5 | 506.4 | 507.3 | 508.2 | 509.1 | 510.0 | 510.9 | 511.8 | 512.7 | 513.6 | 514.5 | 515.4 | 516.3 | 517.2 | 518.1 | 519.0 | 519.9 | 520.8 | 521.7 | 522.6 | 523.5 | 524.4 | 525.3 | 526.2 | 527.1 | 528.0 | 528.9 | 529.8 | 530.7 | 531.6 | 532.5 | 533.4 | 534.3 | 535.2 | 536.1 | 537.0 | 537.9 | 538.8 | 539.7 | 540.6 | 541.5 | 542.4 | 543.3 | 544.2 | 545.1 | 546.0 | 546.9 | 547.8 | 548.7 | 549.6 | 550.5 | 551.4 | 552.3 | 553.2 | 554.1 | 555.0 | 555.9 | 556.8 | 557.7 | 558.6 | 559.5 | 560.4 | 561.3 | 562.2 | 563.1 | 564.0 | 564.9 | 565.8 | 566.7 | 567.6 | 568.5 | 569.4 | 570.3 | 571.2 | 572.1 | 573.0 | 573.9 | 574.8 | 575.7 | 576.6 | 577.5 | 578.4 | 579.3 | 580.2 | 581.1 | 582.0 | 582.9 | 583.8 | 584.7 | 585.6 | 586.5 | 587.4 | 588.3 | 589.2 | 590.1 | 591.0 | 591.9 | 592.8 | 593.7 | 594.6 | 595.5 | 596.4 | 597.3 | 598.2 | 599.1 | 600.0 | 600.9 | 601.8 | 602.7 | 603.6 | 604.5 | 605.4 | 606.3 | 607.2 | 608.1 | 609.0 | 609.9 | 610.8 | 611.7 | 612.6 | 613.5 | 614.4 | 615.3 | 616.2 | 617.1 | 618.0 | 618.9 | 619.8 | 620.7 | 621.6 | 622.5 | 623.4 | 624.3 | 625.2 | 626.1 | 627.0 | 627.9 | 628.8 | 629.7 | 630.6 | 631.5 | 632.4 | 633.3 | 634.2 | 635.1 | 636.0 | 636.9 | 637.8 | 638.7 | 639.6 | 640.5 | 641.4 | 642.3 | 643.2 | 644.1 | 645.0 | 645.9 | 646.8 | 647.7 | 648.6 | 649.5 | 650.4 | 651.3 | 652.2 | 653.1 | 654.0 | 654.9 | 655.8 | 656.7 | 657.6 | 658.5 | 659.4 | 660.3 | 661.2 | 662.1 | 663.0 | 663.9 | 664.8 | 665.7 | 666.6 | 667.5 | 668.4 | 669.3 | 670.2 | 671.1 | 672.0 | 672.9 | 673.8 | 674.7 | 675.6 | 676.5 | 677.4 | 678.3 | 679.2 | 680.1 | 681.0 | 681.9 | 682.8 | 683.7 | 684.6 | 685.5 | 686.4 | 687.3 | 688.2 | 689.1 | 690.0 | 690.9 | 691.8 | 692.7 | 693.6 | 694.5 | 695.4 | 696.3 | 697.2 | 698.1 | 699.0 | 699.9 | 700.8 | 701.7 | 702.6 | 703.5 | 704.4 | 705.3 | 706.2 | 707.1 | 708.0 | 708.9 | 709.8 | 710.7 | 711.6 | 712.5 | 713.4 | 714.3 | 715.2 | 716.1 | 717.0 | 717.9 | 718.8 | 719.7 | 720.6 | 721.5 | 722.4 | 723.3 | 724.2 | 725.1 | 726.0 | 726.9 | 727.8 | 728.7 | 729.6 | 730.5 | 731.4 | 732.3 | 733.2 | 734.1 | 735.0 | 735.9 | 736.8 | 737.7 | 738.6 | 739.5 | 740.4 | 741.3 | 742.2 | 743.1 | 744.0 | 744.9 | 745.8 | 746.7 | 747.6 | 748.5 | 749.4 | 750.3 | 751.2 | 752.1 | 753.0 | 753.9 | 754.8 | 755.7 | 756.6 | 757.5 | 758.4 | 759.3 | 760.2 | 761.1 | 762.0 | 762.9 | 763.8 | 764.7 | 765.6 | 766.5 | 767.4 | 768.3 | 769.2 | 770.1 | 771.0 | 771.9 | 772.8 | 773.7 | 774.6 | 775.5 | 776.4 | 777.3 | 778.2 | 779.1 | 780.0 | 780.9 | 781.8 | 782.7 | 783.6 | 784.5 | 785.4 | 786.3 | 787.2 | 788.1 | 789.0 | 789.9 | 790.8 | 791.7 | 792.6 | 793.5 | 794.4 | 795.3 | 796.2 | 797.1 | 798.0 | 798.9 | 799.8 | 800.7 | 801.6 | 802.5 | 803.4 | 804.3 | 805.2 | 806.1 | 807.0 | 807.9 | 808.8 | 809.7 | 810.6 | 811.5 | 812.4 | 813.3 | 814.2 | 815.1 | 816.0 | 816.9 | 817.8 | 818.7 | 819.6 | 820.5 | 821.4 | 822.3 | 823.2 | 824.1 | 825.0 | 825.9 | 826.8 | 827.7 | 828.6 | 829.5 | 830.4 | 831.3 | 832.2 | 833.1 | 834.0 | 834.9 | 835.8 | 836.7 | 837.6 | 838.5 | 839.4 | 840.3 | 841.2 | 842.1 | 843.0 | 843.9 | 844.8 | 845.7 | 846.6 | 847.5 | 848.4 | 849.3 | 850.2 | 851.1 | 852.0 | 852.9 | 853.8 | 854.7 | 855.6 | 856.5 | 857.4 | 858.3 | 859.2 | 860.1 | 861.0 | 861.9 | 862.8 | 863.7 | 864.6 | 865.5 | 866.4 | 867.3 | 868.2 | 869.1 | 870.0 | 870.9 | 871.8 | 872.7 | 873.6 | 874.5 | 875.4 | 876.3 | 877.2 | 878.1 | 879.0 | 879.9 | 880.8 | 881.7 | 882.6 | 883.5 | 884.4 | 885.3 | 886.2 | 887.1 | 888.0 | 888.9 | 889.8 | 890.7 | 891.6 | 892.5 | 893.4 | 894.3 | 895.2 | 896.1 | 897.0 | 897.9 | 898.8 | 899.7 | 900.6 | 901.5 | 902.4 | 903.3 | 904.2 | 905.1 | 906.0 | 906.9 | 907.8 | 908.7 | 909.6 | 910.5 | 911.4 | 912.3 | 913.2 | 914.1 | 915.0 | 915.9 | 916.8 | 917.7 | 918.6 | 919.5 | 920.4 | 921.3 | 922.2 | 923.1 | 924.0 | 924.9 | 925.8 | 926.7 | 927.6 | 928.5 | 929.4 | 930.3 | 931.2 | 932.1 | 933.0 | 933.9 | 934.8 | 935.7 | 936.6 | 937.5 | 938.4 | 939.3 | 940.2 | 941.1 | 942.0 | 942.9 | 943.8 | 944.7 | 945.6 | 946.5 | 947.4 | 948.3 | 949.2 | 950.1 | 951.0 | 951.9 | 952.8 | 953.7 | 954.6 | 955.5 | 956.4 | 957.3 | 958.2 | 959.1 | 960.0 | 960.9 | 961.8 | 962.7 | 963.6 | 964.5 | 965.4 | 966.3 | 967.2 | 968.1 | 969.0 | 969.9 | 970.8 | 971.7 | 972.6 | 973.5 | 974.4 | 975.3 | 976.2 | 977.1 | 978.0 | 978.9 | 979.8 | 980.7 | 981.6 | 982.5 | 983.4 | 984.3 | 985.2 | 986.1 | 987.0 | 987.9 | 988.8 | 989.7 | 990.6 | 991.5 | 992.4 | 993.3 | 994.2 | 995.1 | 996.0 | 996.9 | 997.8 | 998.7 | 999.6 | 1000.5 | 1001.4 | 1002.3 | 1003.2 | 1004.1 | 1005.0 | 1005.9 | 1006.8 | 1007.7 | 1008.6 | 1009.5 | 1010.4 | 1011.3 | 1012.2 | 1013.1 | 1014.0 | 1014.9 | 1015.8 | 1016.7 | 1017.6 | 1018.5 | 1019.4 | 1020.3 | 1021.2 | 1022.1 | 1023.0 | 1023.9 | 1024.8 | 1025.7 | 1026.6 | 1027.5 | 1028.4 | 1029.3 | 1030.2 | 1031.1 | 1032.0 | 1032.9 | 1033.8 | 1034.7 | 1035.6 | 1036.5 | 1037.4 | 1038.3 | 1039.2 | 1040.1 | 1041.0 | 1041.9 | 1042.8 | 1043.7 | 1044.6 | 1045.5 | 1046.4 | 1047.3 | 1048.2 | 1049.1 | 1050.0 | 1050.9 | 1051.8 | 1052.7 | 1053.6 | 1054.5 | 1055.4 | 1056.3 | 1057.2 | 1058.1 | 1059.0 | 1059.9 | 1060.8 | 1061.7 | 1062.6 | 1063.5 | 1064.4 | 1065.3 | 1066.2 | 1067.1 | 1068.0 | 1068.9 | 1069.8 | 1070.7 | 1071.6 | 1072.5 | 1073.4 | 1074.3 | 1075.2 | 1076.1 | 1077.0 | 1077.9 | 1078.8 | 1079.7 | 1080.6 | 1081.5 | 1082.4 | 1083.3 | 1084.2 | 1085.1 | 1086.0 | 1086.9 | 1087.8 | 1088.7 | 1089.6 | 1090.5 | 1091.4 | 1092.3 | 1093.2 | 1094.1 | 1095.0 | 1095.9 | 1096.8 | 1097.7 | 1098.6 | 1099.5 | 1100.4 | 1101.3 | 1102.2 | 1103.1 | 1104.0 | 1104.9 | 1105.8 | 1106.7 | 1107.6 | 1108.5 | 1109.4 | 1110.3 | 1111.2 | 1112.1 | 1113.0 | 1113.9 | 1114.8 | 1115.7 | 1116.6 | 1117. |
|-------|-----|------|------|------|------|------|------|------|------|------|------|------|------|------|------|------|------|------|------|------|------|------|------|------|------|------|------|------|------|------|------|------|------|------|------|------|------|------|------|------|------|------|------|------|------|------|------|------|------|------|------|------|------|------|------|------|------|------|------|------|------|------|------|------|------|------|------|------|------|------|------|------|------|------|------|------|------|------|------|------|------|------|------|------|------|------|------|------|------|------|------|------|------|------|------|------|------|------|------|------|------|-------|-------|-------|-------|-------|-------|-------|-------|-------|-------|-------|-------|-------|-------|-------|-------|-------|-------|-------|-------|-------|-------|-------|-------|-------|-------|-------|-------|-------|-------|-------|-------|-------|-------|-------|-------|-------|-------|-------|-------|-------|-------|-------|-------|-------|-------|-------|-------|-------|-------|-------|-------|-------|-------|-------|-------|-------|-------|-------|-------|-------|-------|-------|-------|-------|-------|-------|-------|-------|-------|-------|-------|-------|-------|-------|-------|-------|-------|-------|-------|-------|-------|-------|-------|-------|-------|-------|-------|-------|-------|-------|-------|-------|-------|-------|-------|-------|-------|-------|-------|-------|-------|-------|-------|-------|-------|-------|-------|-------|-------|-------|-------|-------|-------|-------|-------|-------|-------|-------|-------|-------|-------|-------|-------|-------|-------|-------|-------|-------|-------|-------|-------|-------|-------|-------|-------|-------|-------|-------|-------|-------|-------|-------|-------|-------|-------|-------|-------|-------|-------|-------|-------|-------|-------|-------|-------|-------|-------|-------|-------|-------|-------|-------|-------|-------|-------|-------|-------|-------|-------|-------|-------|-------|-------|-------|-------|-------|-------|-------|-------|-------|-------|-------|-------|-------|-------|-------|-------|-------|-------|-------|-------|-------|-------|-------|-------|-------|-------|-------|-------|-------|-------|-------|-------|-------|-------|-------|-------|-------|-------|-------|-------|-------|-------|-------|-------|-------|-------|-------|-------|-------|-------|-------|-------|-------|-------|-------|-------|-------|-------|-------|-------|-------|-------|-------|-------|-------|-------|-------|-------|-------|-------|-------|-------|-------|-------|-------|-------|-------|-------|-------|-------|-------|-------|-------|-------|-------|-------|-------|-------|-------|-------|-------|-------|-------|-------|-------|-------|-------|-------|-------|-------|-------|-------|-------|-------|-------|-------|-------|-------|-------|-------|-------|-------|-------|-------|-------|-------|-------|-------|-------|-------|-------|-------|-------|-------|-------|-------|-------|-------|-------|-------|-------|-------|-------|-------|-------|-------|-------|-------|-------|-------|-------|-------|-------|-------|-------|-------|-------|-------|-------|-------|-------|-------|-------|-------|-------|-------|-------|-------|-------|-------|-------|-------|-------|-------|-------|-------|-------|-------|-------|-------|-------|-------|-------|-------|-------|-------|-------|-------|-------|-------|-------|-------|-------|-------|-------|-------|-------|-------|-------|-------|-------|-------|-------|-------|-------|-------|-------|-------|-------|-------|-------|-------|-------|-------|-------|-------|-------|-------|-------|-------|-------|-------|-------|-------|-------|-------|-------|-------|-------|-------|-------|-------|-------|-------|-------|-------|-------|-------|-------|-------|-------|-------|-------|-------|-------|-------|-------|-------|-------|-------|-------|-------|-------|-------|-------|-------|-------|-------|-------|-------|-------|-------|-------|-------|-------|-------|-------|-------|-------|-------|-------|-------|-------|-------|-------|-------|-------|-------|-------|-------|-------|-------|-------|-------|-------|-------|-------|-------|-------|-------|-------|-------|-------|-------|-------|-------|-------|-------|-------|-------|-------|-------|-------|-------|-------|-------|-------|-------|-------|-------|-------|-------|-------|-------|-------|-------|-------|-------|-------|-------|-------|-------|-------|-------|-------|-------|-------|-------|-------|-------|-------|-------|-------|-------|-------|-------|-------|-------|-------|-------|-------|-------|-------|-------|-------|-------|-------|-------|-------|-------|-------|-------|-------|-------|-------|-------|-------|-------|-------|-------|-------|-------|-------|-------|-------|-------|-------|-------|-------|-------|-------|-------|-------|-------|-------|-------|-------|-------|-------|-------|-------|-------|-------|-------|-------|-------|-------|-------|-------|-------|-------|-------|-------|-------|-------|-------|-------|-------|-------|-------|-------|-------|-------|-------|-------|-------|-------|-------|-------|-------|-------|-------|-------|-------|-------|-------|-------|-------|-------|-------|-------|-------|-------|-------|-------|-------|-------|-------|-------|-------|-------|-------|-------|-------|-------|-------|-------|-------|-------|-------|-------|-------|-------|-------|-------|-------|-------|-------|-------|-------|-------|-------|-------|-------|-------|-------|-------|-------|-------|-------|-------|-------|-------|-------|-------|-------|-------|-------|-------|-------|-------|-------|-------|-------|-------|-------|-------|-------|-------|-------|-------|-------|-------|-------|-------|-------|-------|-------|-------|-------|-------|-------|-------|-------|-------|-------|-------|-------|-------|-------|-------|-------|-------|-------|-------|-------|-------|-------|-------|-------|-------|-------|-------|-------|-------|-------|-------|-------|-------|-------|-------|-------|-------|-------|-------|-------|-------|-------|-------|-------|-------|-------|-------|-------|-------|-------|-------|-------|-------|-------|-------|-------|-------|-------|-------|-------|-------|-------|-------|-------|-------|-------|-------|-------|-------|-------|-------|-------|-------|-------|-------|-------|-------|-------|-------|-------|-------|-------|-------|-------|-------|-------|-------|-------|-------|-------|-------|-------|-------|-------|-------|-------|-------|-------|-------|-------|-------|-------|-------|-------|-------|-------|-------|-------|-------|-------|-------|-------|-------|-------|-------|-------|-------|-------|-------|-------|-------|-------|-------|-------|-------|-------|-------|-------|-------|-------|-------|-------|-------|-------|-------|-------|-------|-------|-------|-------|-------|-------|-------|-------|-------|-------|-------|-------|-------|-------|-------|-------|-------|-------|-------|-------|-------|-------|-------|-------|-------|-------|-------|-------|-------|-------|-------|-------|-------|-------|-------|-------|-------|-------|-------|-------|-------|-------|-------|-------|-------|-------|-------|-------|-------|-------|-------|-------|-------|-------|-------|-------|-------|-------|-------|-------|-------|-------|-------|-------|-------|-------|-------|-------|-------|-------|-------|-------|-------|-------|-------|-------|-------|-------|-------|-------|-------|-------|-------|-------|-------|-------|-------|-------|-------|-------|-------|-------|-------|-------|-------|-------|-------|-------|-------|-------|-------|-------|-------|-------|-------|-------|-------|-------|-------|-------|-------|-------|-------|-------|-------|-------|-------|-------|-------|-------|-------|-------|-------|-------|-------|-------|-------|-------|-------|-------|-------|-------|-------|-------|-------|-------|-------|-------|-------|-------|-------|-------|-------|-------|-------|-------|-------|-------|-------|-------|-------|-------|-------|-------|-------|-------|-------|-------|-------|-------|-------|-------|-------|-------|-------|-------|-------|-------|-------|-------|-------|-------|-------|-------|-------|-------|-------|-------|-------|-------|-------|-------|-------|-------|-------|-------|-------|-------|-------|-------|-------|-------|-------|-------|-------|-------|-------|-------|-------|-------|-------|-------|-------|-------|-------|-------|-------|-------|-------|-------|-------|-------|-------|-------|-------|-------|--------|--------|--------|--------|--------|--------|--------|--------|--------|--------|--------|--------|--------|--------|--------|--------|--------|--------|--------|--------|--------|--------|--------|--------|--------|--------|--------|--------|--------|--------|--------|--------|--------|--------|--------|--------|--------|--------|--------|--------|--------|--------|--------|--------|--------|--------|--------|--------|--------|--------|--------|--------|--------|--------|--------|--------|--------|--------|--------|--------|--------|--------|--------|--------|--------|--------|--------|--------|--------|--------|--------|--------|--------|--------|--------|--------|--------|--------|--------|--------|--------|--------|--------|--------|--------|--------|--------|--------|--------|--------|--------|--------|--------|--------|--------|--------|--------|--------|--------|--------|--------|--------|--------|--------|--------|--------|--------|--------|--------|--------|--------|--------|--------|--------|--------|--------|--------|--------|--------|--------|--------|--------|--------|--------|--------|--------|--------|--------|--------|--------|-------|

















































|        |    |    |    |    |    |    |    |    |    |    |    |    |    |    |    |    |     |     |     |     |     |     |     |     |     |     |     |     |     |     |     |     |     |     |     |     |     |     |     |     |     |     |     |     |     |     |     |     |     |     |     |     |     |     |     |     |     |     |     |     |     |     |     |     |     |     |     |     |     |     |     |     |     |     |     |     |     |     |     |     |     |     |     |     |     |     |     |     |     |     |     |     |     |     |     |     |     |     |     |     |     |     |     |     |     |     |     |     |     |     |     |     |     |     |     |     |     |     |     |     |     |     |     |     |     |     |     |     |     |     |     |     |     |     |     |     |     |     |     |     |     |     |     |     |     |     |     |     |     |     |     |     |     |     |     |     |     |     |     |     |     |     |     |     |     |     |      |      |      |      |      |      |      |      |      |      |      |      |      |      |      |      |      |      |      |      |      |      |      |      |      |      |      |      |      |      |      |      |      |      |      |      |      |      |      |      |      |      |      |      |      |      |      |      |      |      |      |      |      |      |      |      |      |      |      |      |      |      |      |      |      |      |      |      |      |      |      |      |      |      |      |      |      |      |      |      |      |      |      |      |      |      |      |      |      |      |      |      |      |      |      |      |      |      |      |      |      |      |      |      |      |      |      |      |      |      |      |      |      |      |      |      |      |      |      |      |      |      |      |      |      |      |      |      |      |      |      |      |      |      |      |      |      |      |      |      |      |      |      |      |      |      |      |      |      |      |      |      |      |      |      |      |      |      |      |      |      |      |      |      |      |      |      |      |      |      |      |      |      |      |      |      |      |      |      |      |      |      |      |      |      |      |      |      |      |      |      |      |      |      |      |      |      |      |      |      |      |      |      |      |      |      |      |      |      |      |      |      |      |      |      |      |      |      |      |      |      |      |      |      |      |      |      |      |      |      |      |      |      |      |      |      |      |      |      |      |      |      |      |      |      |      |      |      |      |      |      |      |      |      |      |      |      |      |      |      |      |      |      |      |      |      |      |      |      |      |      |      |      |      |      |      |      |      |      |      |      |      |      |      |      |      |      |      |      |      |      |      |      |      |      |      |      |      |      |      |      |      |      |      |      |      |      |      |      |      |      |      |      |      |      |      |      |      |      |      |      |      |      |      |      |      |      |      |      |      |      |      |      |      |      |      |      |      |      |      |      |      |      |      |      |      |      |      |      |      |      |      |      |      |      |      |      |      |      |      |      |      |      |      |      |      |      |      |      |      |      |      |      |      |      |      |      |      |      |      |      |      |      |      |      |      |      |      |      |      |      |      |      |      |      |      |      |      |      |      |      |      |      |      |      |      |      |      |      |      |      |      |      |      |      |      |      |      |      |      |      |      |      |      |      |      |      |      |      |      |      |      |      |      |      |      |      |      |      |      |      |      |      |      |      |      |      |      |      |      |      |      |      |      |      |      |      |      |      |      |      |      |      |      |      |      |      |      |      |      |      |      |      |      |      |      |      |      |      |      |      |      |      |      |      |      |      |      |      |      |      |      |      |      |      |      |      |      |      |      |      |      |      |      |      |      |      |      |      |      |      |      |      |      |      |      |      |      |      |      |      |      |      |      |      |      |      |      |      |      |      |      |      |      |      |      |      |      |      |      |      |      |      |      |      |      |      |      |      |      |      |      |      |      |      |      |      |      |      |      |      |      |      |      |      |      |      |      |      |      |      |      |      |      |      |      |      |      |      |      |      |      |      |      |      |      |      |      |      |      |      |      |      |      |      |      |      |      |      |      |      |      |      |      |      |      |      |      |      |      |      |      |      |      |      |      |      |      |      |      |      |      |      |      |      |      |      |      |      |      |      |      |      |      |      |      |      |      |      |      |      |      |      |      |      |      |      |      |      |      |      |      |      |      |      |      |      |      |      |      |      |      |      |      |      |      |      |      |      |      |      |      |      |      |      |      |      |      |      |      |      |      |      |      |      |      |      |      |      |      |      |      |      |      |      |      |      |      |      |      |      |      |      |      |      |      |      |      |      |      |      |      |      |      |      |      |      |      |      |      |      |      |      |      |      |      |      |      |      |      |      |      |      |      |      |      |      |      |      |      |      |      |      |      |      |      |      |      |      |      |      |      |      |      |      |      |      |      |      |      |      |      |      |      |      |      |      |      |      |      |      |      |      |      |      |      |      |      |      |      |      |      |      |      |      |      |      |      |      |      |      |      |      |      |      |      |      |      |      |      |      |      |      |      |      |      |      |      |      |      |      |      |      |      |      |      |      |      |      |      |      |      |      |      |      |      |      |      |      |      |      |      |      |      |      |      |      |      |      |      |      |      |      |      |      |      |      |      |      |      |      |      |      |      |      |      |      |      |      |      |      |      |      |      |      |      |      |      |      |      |      |      |      |      |      |      |      |      |      |      |      |      |      |      |      |      |      |      |      |      |      |      |      |      |      |      |      |      |      |      |      |      |      |      |      |      |      |      |      |      |      |      |      |      |      |      |      |      |      |      |      |      |      |      |      |      |      |      |      |      |      |      |      |      |      |      |      |      |      |      |      |      |      |      |      |      |      |      |      |      |      |      |      |      |      |      |      |      |      |      |      |      |      |      |      |      |      |      |      |      |      |      |      |      |      |      |      |      |      |      |      |      |      |      |      |      |      |      |      |      |      |      |      |      |      |      |      |      |      |      |      |      |      |      |      |      |      |      |      |      |      |      |      |      |      |      |      |      |      |      |      |      |      |      |      |      |      |      |      |      |      |      |      |      |      |      |      |      |      |      |      |      |      |      |      |      |      |      |      |      |      |      |      |      |      |      |      |      |      |      |      |      |      |      |      |      |      |      |      |      |      |      |      |      |      |      |      |      |      |      |      |      |      |      |      |      |      |      |      |      |      |      |      |      |      |      |      |      |      |      |      |      |      |      |      |      |      |      |      |      |      |      |      |      |      |      |      |      |      |      |      |      |      |      |      |      |      |      |      |      |      |      |      |      |      |      |      |      |      |      |      |      |      |      |      |      |      |      |      |      |      |      |      |      |      |      |      |      |      |      |      |      |      |      |      |      |      |      |      |      |      |      |      |      |      |      |      |      |      |      |      |      |      |      |      |      |      |      |      |      |      |      |      |      |      |      |      |      |      |      |      |      |      |      |      |      |      |      |      |      |      |      |      |      |      |      |      |      |      |      |      |      |      |      |     |
|--------|----|----|----|----|----|----|----|----|----|----|----|----|----|----|----|----|-----|-----|-----|-----|-----|-----|-----|-----|-----|-----|-----|-----|-----|-----|-----|-----|-----|-----|-----|-----|-----|-----|-----|-----|-----|-----|-----|-----|-----|-----|-----|-----|-----|-----|-----|-----|-----|-----|-----|-----|-----|-----|-----|-----|-----|-----|-----|-----|-----|-----|-----|-----|-----|-----|-----|-----|-----|-----|-----|-----|-----|-----|-----|-----|-----|-----|-----|-----|-----|-----|-----|-----|-----|-----|-----|-----|-----|-----|-----|-----|-----|-----|-----|-----|-----|-----|-----|-----|-----|-----|-----|-----|-----|-----|-----|-----|-----|-----|-----|-----|-----|-----|-----|-----|-----|-----|-----|-----|-----|-----|-----|-----|-----|-----|-----|-----|-----|-----|-----|-----|-----|-----|-----|-----|-----|-----|-----|-----|-----|-----|-----|-----|-----|-----|-----|-----|-----|-----|-----|-----|-----|-----|-----|-----|-----|-----|-----|-----|-----|-----|------|------|------|------|------|------|------|------|------|------|------|------|------|------|------|------|------|------|------|------|------|------|------|------|------|------|------|------|------|------|------|------|------|------|------|------|------|------|------|------|------|------|------|------|------|------|------|------|------|------|------|------|------|------|------|------|------|------|------|------|------|------|------|------|------|------|------|------|------|------|------|------|------|------|------|------|------|------|------|------|------|------|------|------|------|------|------|------|------|------|------|------|------|------|------|------|------|------|------|------|------|------|------|------|------|------|------|------|------|------|------|------|------|------|------|------|------|------|------|------|------|------|------|------|------|------|------|------|------|------|------|------|------|------|------|------|------|------|------|------|------|------|------|------|------|------|------|------|------|------|------|------|------|------|------|------|------|------|------|------|------|------|------|------|------|------|------|------|------|------|------|------|------|------|------|------|------|------|------|------|------|------|------|------|------|------|------|------|------|------|------|------|------|------|------|------|------|------|------|------|------|------|------|------|------|------|------|------|------|------|------|------|------|------|------|------|------|------|------|------|------|------|------|------|------|------|------|------|------|------|------|------|------|------|------|------|------|------|------|------|------|------|------|------|------|------|------|------|------|------|------|------|------|------|------|------|------|------|------|------|------|------|------|------|------|------|------|------|------|------|------|------|------|------|------|------|------|------|------|------|------|------|------|------|------|------|------|------|------|------|------|------|------|------|------|------|------|------|------|------|------|------|------|------|------|------|------|------|------|------|------|------|------|------|------|------|------|------|------|------|------|------|------|------|------|------|------|------|------|------|------|------|------|------|------|------|------|------|------|------|------|------|------|------|------|------|------|------|------|------|------|------|------|------|------|------|------|------|------|------|------|------|------|------|------|------|------|------|------|------|------|------|------|------|------|------|------|------|------|------|------|------|------|------|------|------|------|------|------|------|------|------|------|------|------|------|------|------|------|------|------|------|------|------|------|------|------|------|------|------|------|------|------|------|------|------|------|------|------|------|------|------|------|------|------|------|------|------|------|------|------|------|------|------|------|------|------|------|------|------|------|------|------|------|------|------|------|------|------|------|------|------|------|------|------|------|------|------|------|------|------|------|------|------|------|------|------|------|------|------|------|------|------|------|------|------|------|------|------|------|------|------|------|------|------|------|------|------|------|------|------|------|------|------|------|------|------|------|------|------|------|------|------|------|------|------|------|------|------|------|------|------|------|------|------|------|------|------|------|------|------|------|------|------|------|------|------|------|------|------|------|------|------|------|------|------|------|------|------|------|------|------|------|------|------|------|------|------|------|------|------|------|------|------|------|------|------|------|------|------|------|------|------|------|------|------|------|------|------|------|------|------|------|------|------|------|------|------|------|------|------|------|------|------|------|------|------|------|------|------|------|------|------|------|------|------|------|------|------|------|------|------|------|------|------|------|------|------|------|------|------|------|------|------|------|------|------|------|------|------|------|------|------|------|------|------|------|------|------|------|------|------|------|------|------|------|------|------|------|------|------|------|------|------|------|------|------|------|------|------|------|------|------|------|------|------|------|------|------|------|------|------|------|------|------|------|------|------|------|------|------|------|------|------|------|------|------|------|------|------|------|------|------|------|------|------|------|------|------|------|------|------|------|------|------|------|------|------|------|------|------|------|------|------|------|------|------|------|------|------|------|------|------|------|------|------|------|------|------|------|------|------|------|------|------|------|------|------|------|------|------|------|------|------|------|------|------|------|------|------|------|------|------|------|------|------|------|------|------|------|------|------|------|------|------|------|------|------|------|------|------|------|------|------|------|------|------|------|------|------|------|------|------|------|------|------|------|------|------|------|------|------|------|------|------|------|------|------|------|------|------|------|------|------|------|------|------|------|------|------|------|------|------|------|------|------|------|------|------|------|------|------|------|------|------|------|------|------|------|------|------|------|------|------|------|------|------|------|------|------|------|------|------|------|------|------|------|------|------|------|------|------|------|------|------|------|------|------|------|------|------|------|------|------|------|------|------|------|------|------|------|------|------|------|------|------|------|------|------|------|------|------|------|------|------|------|------|------|------|------|------|------|------|------|------|------|------|------|------|------|------|------|------|------|------|------|------|------|------|------|------|------|------|------|------|------|------|------|------|------|------|------|------|------|------|------|------|------|------|------|------|------|------|------|------|------|------|------|------|------|------|------|------|------|------|------|------|------|------|------|------|------|------|------|------|------|------|------|------|------|------|------|------|------|------|------|------|------|------|------|------|------|------|------|------|------|------|------|------|------|------|------|------|------|------|------|------|------|------|------|------|------|------|------|------|------|------|------|------|------|------|------|------|------|------|------|------|------|------|------|------|------|------|------|------|------|------|------|------|------|------|------|------|------|------|------|------|------|------|------|------|------|------|------|------|------|------|------|------|------|------|------|------|------|------|------|------|------|------|------|------|------|------|------|------|------|------|------|------|------|------|------|------|------|------|------|------|------|------|------|------|------|------|------|------|------|------|------|------|------|------|------|------|------|------|------|------|------|------|------|------|------|------|------|------|------|------|------|------|------|------|------|------|------|------|------|------|------|------|------|------|------|------|------|------|------|------|------|------|------|------|------|------|------|------|------|------|------|------|------|------|------|------|------|------|------|------|------|------|------|------|------|------|------|------|------|------|------|------|------|------|------|------|------|------|------|------|------|------|------|------|------|------|------|------|------|------|------|------|------|------|------|------|------|------|------|------|------|------|------|------|------|------|------|------|------|------|------|------|------|------|------|------|------|------|------|------|------|------|------|------|------|------|------|------|------|------|------|------|------|------|------|------|------|------|------|------|------|------|------|------|------|------|------|------|------|------|------|------|------|------|------|------|------|-----|
| 250550 | 25 | 10 | 22 | 26 | 31 | 37 | 43 | 49 | 55 | 61 | 67 | 73 | 79 | 85 | 91 | 97 | 103 | 109 | 115 | 121 | 127 | 133 | 139 | 145 | 151 | 157 | 163 | 169 | 175 | 181 | 187 | 193 | 199 | 205 | 211 | 217 | 223 | 229 | 235 | 241 | 247 | 253 | 259 | 265 | 271 | 277 | 283 | 289 | 295 | 301 | 307 | 313 | 319 | 325 | 331 | 337 | 343 | 349 | 355 | 361 | 367 | 373 | 379 | 385 | 391 | 397 | 403 | 409 | 415 | 421 | 427 | 433 | 439 | 445 | 451 | 457 | 463 | 469 | 475 | 481 | 487 | 493 | 499 | 505 | 511 | 517 | 523 | 529 | 535 | 541 | 547 | 553 | 559 | 565 | 571 | 577 | 583 | 589 | 595 | 601 | 607 | 613 | 619 | 625 | 631 | 637 | 643 | 649 | 655 | 661 | 667 | 673 | 679 | 685 | 691 | 697 | 703 | 709 | 715 | 721 | 727 | 733 | 739 | 745 | 751 | 757 | 763 | 769 | 775 | 781 | 787 | 793 | 799 | 805 | 811 | 817 | 823 | 829 | 835 | 841 | 847 | 853 | 859 | 865 | 871 | 877 | 883 | 889 | 895 | 901 | 907 | 913 | 919 | 925 | 931 | 937 | 943 | 949 | 955 | 961 | 967 | 973 | 979 | 985 | 991 | 997 | 1003 | 1009 | 1015 | 1021 | 1027 | 1033 | 1039 | 1045 | 1051 | 1057 | 1063 | 1069 | 1075 | 1081 | 1087 | 1093 | 1099 | 1105 | 1111 | 1117 | 1123 | 1129 | 1135 | 1141 | 1147 | 1153 | 1159 | 1165 | 1171 | 1177 | 1183 | 1189 | 1195 | 1201 | 1207 | 1213 | 1219 | 1225 | 1231 | 1237 | 1243 | 1249 | 1255 | 1261 | 1267 | 1273 | 1279 | 1285 | 1291 | 1297 | 1303 | 1309 | 1315 | 1321 | 1327 | 1333 | 1339 | 1345 | 1351 | 1357 | 1363 | 1369 | 1375 | 1381 | 1387 | 1393 | 1399 | 1405 | 1411 | 1417 | 1423 | 1429 | 1435 | 1441 | 1447 | 1453 | 1459 | 1465 | 1471 | 1477 | 1483 | 1489 | 1495 | 1501 | 1507 | 1513 | 1519 | 1525 | 1531 | 1537 | 1543 | 1549 | 1555 | 1561 | 1567 | 1573 | 1579 | 1585 | 1591 | 1597 | 1603 | 1609 | 1615 | 1621 | 1627 | 1633 | 1639 | 1645 | 1651 | 1657 | 1663 | 1669 | 1675 | 1681 | 1687 | 1693 | 1699 | 1705 | 1711 | 1717 | 1723 | 1729 | 1735 | 1741 | 1747 | 1753 | 1759 | 1765 | 1771 | 1777 | 1783 | 1789 | 1795 | 1801 | 1807 | 1813 | 1819 | 1825 | 1831 | 1837 | 1843 | 1849 | 1855 | 1861 | 1867 | 1873 | 1879 | 1885 | 1891 | 1897 | 1903 | 1909 | 1915 | 1921 | 1927 | 1933 | 1939 | 1945 | 1951 | 1957 | 1963 | 1969 | 1975 | 1981 | 1987 | 1993 | 1999 | 2005 | 2011 | 2017 | 2023 | 2029 | 2035 | 2041 | 2047 | 2053 | 2059 | 2065 | 2071 | 2077 | 2083 | 2089 | 2095 | 2101 | 2107 | 2113 | 2119 | 2125 | 2131 | 2137 | 2143 | 2149 | 2155 | 2161 | 2167 | 2173 | 2179 | 2185 | 2191 | 2197 | 2203 | 2209 | 2215 | 2221 | 2227 | 2233 | 2239 | 2245 | 2251 | 2257 | 2263 | 2269 | 2275 | 2281 | 2287 | 2293 | 2299 | 2305 | 2311 | 2317 | 2323 | 2329 | 2335 | 2341 | 2347 | 2353 | 2359 | 2365 | 2371 | 2377 | 2383 | 2389 | 2395 | 2401 | 2407 | 2413 | 2419 | 2425 | 2431 | 2437 | 2443 | 2449 | 2455 | 2461 | 2467 | 2473 | 2479 | 2485 | 2491 | 2497 | 2503 | 2509 | 2515 | 2521 | 2527 | 2533 | 2539 | 2545 | 2551 | 2557 | 2563 | 2569 | 2575 | 2581 | 2587 | 2593 | 2599 | 2605 | 2611 | 2617 | 2623 | 2629 | 2635 | 2641 | 2647 | 2653 | 2659 | 2665 | 2671 | 2677 | 2683 | 2689 | 2695 | 2701 | 2707 | 2713 | 2719 | 2725 | 2731 | 2737 | 2743 | 2749 | 2755 | 2761 | 2767 | 2773 | 2779 | 2785 | 2791 | 2797 | 2803 | 2809 | 2815 | 2821 | 2827 | 2833 | 2839 | 2845 | 2851 | 2857 | 2863 | 2869 | 2875 | 2881 | 2887 | 2893 | 2899 | 2905 | 2911 | 2917 | 2923 | 2929 | 2935 | 2941 | 2947 | 2953 | 2959 | 2965 | 2971 | 2977 | 2983 | 2989 | 2995 | 3001 | 3007 | 3013 | 3019 | 3025 | 3031 | 3037 | 3043 | 3049 | 3055 | 3061 | 3067 | 3073 | 3079 | 3085 | 3091 | 3097 | 3103 | 3109 | 3115 | 3121 | 3127 | 3133 | 3139 | 3145 | 3151 | 3157 | 3163 | 3169 | 3175 | 3181 | 3187 | 3193 | 3199 | 3205 | 3211 | 3217 | 3223 | 3229 | 3235 | 3241 | 3247 | 3253 | 3259 | 3265 | 3271 | 3277 | 3283 | 3289 | 3295 | 3301 | 3307 | 3313 | 3319 | 3325 | 3331 | 3337 | 3343 | 3349 | 3355 | 3361 | 3367 | 3373 | 3379 | 3385 | 3391 | 3397 | 3403 | 3409 | 3415 | 3421 | 3427 | 3433 | 3439 | 3445 | 3451 | 3457 | 3463 | 3469 | 3475 | 3481 | 3487 | 3493 | 3499 | 3505 | 3511 | 3517 | 3523 | 3529 | 3535 | 3541 | 3547 | 3553 | 3559 | 3565 | 3571 | 3577 | 3583 | 3589 | 3595 | 3601 | 3607 | 3613 | 3619 | 3625 | 3631 | 3637 | 3643 | 3649 | 3655 | 3661 | 3667 | 3673 | 3679 | 3685 | 3691 | 3697 | 3703 | 3709 | 3715 | 3721 | 3727 | 3733 | 3739 | 3745 | 3751 | 3757 | 3763 | 3769 | 3775 | 3781 | 3787 | 3793 | 3799 | 3805 | 3811 | 3817 | 3823 | 3829 | 3835 | 3841 | 3847 | 3853 | 3859 | 3865 | 3871 | 3877 | 3883 | 3889 | 3895 | 3901 | 3907 | 3913 | 3919 | 3925 | 3931 | 3937 | 3943 | 3949 | 3955 | 3961 | 3967 | 3973 | 3979 | 3985 | 3991 | 3997 | 4003 | 4009 | 4015 | 4021 | 4027 | 4033 | 4039 | 4045 | 4051 | 4057 | 4063 | 4069 | 4075 | 4081 | 4087 | 4093 | 4099 | 4105 | 4111 | 4117 | 4123 | 4129 | 4135 | 4141 | 4147 | 4153 | 4159 | 4165 | 4171 | 4177 | 4183 | 4189 | 4195 | 4201 | 4207 | 4213 | 4219 | 4225 | 4231 | 4237 | 4243 | 4249 | 4255 | 4261 | 4267 | 4273 | 4279 | 4285 | 4291 | 4297 | 4303 | 4309 | 4315 | 4321 | 4327 | 4333 | 4339 | 4345 | 4351 | 4357 | 4363 | 4369 | 4375 | 4381 | 4387 | 4393 | 4399 | 4405 | 4411 | 4417 | 4423 | 4429 | 4435 | 4441 | 4447 | 4453 | 4459 | 4465 | 4471 | 4477 | 4483 | 4489 | 4495 | 4501 | 4507 | 4513 | 4519 | 4525 | 4531 | 4537 | 4543 | 4549 | 4555 | 4561 | 4567 | 4573 | 4579 | 4585 | 4591 | 4597 | 4603 | 4609 | 4615 | 4621 | 4627 | 4633 | 4639 | 4645 | 4651 | 4657 | 4663 | 4669 | 4675 | 4681 | 4687 | 4693 | 4699 | 4705 | 4711 | 4717 | 4723 | 4729 | 4735 | 4741 | 4747 | 4753 | 4759 | 4765 | 4771 | 4777 | 4783 | 4789 | 4795 | 4801 | 4807 | 4813 | 4819 | 4825 | 4831 | 4837 | 4843 | 4849 | 4855 | 4861 | 4867 | 4873 | 4879 | 4885 | 4891 | 4897 | 4903 | 4909 | 4915 | 4921 | 4927 | 4933 | 4939 | 4945 | 4951 | 4957 | 4963 | 4969 | 4975 | 4981 | 4987 | 4993 | 4999 | 5005 | 5011 | 5017 | 5023 | 5029 | 5035 | 5041 | 5047 | 5053 | 5059 | 5065 | 5071 | 5077 | 5083 | 5089 | 5095 | 5101 | 5107 | 5113 | 5119 | 5125 | 5131 | 5137 | 5143 | 5149 | 5155 | 5161 | 5167 | 5173 | 5179 | 5185 | 5191 | 5197 | 5203 | 5209 | 5215 | 5221 | 5227 | 5233 | 5239 | 5245 | 5251 | 5257 | 5263 | 5269 | 5275 | 5281 | 5287 | 5293 | 5299 | 5305 | 5311 | 5317 | 5323 | 5329 | 5335 | 5341 | 5347 | 5353 | 5359 | 5365 | 5371 | 5377 | 5383 | 5389 | 5395 | 5401 | 5407 | 5413 | 5419 | 5425 | 5431 | 5437 | 5443 | 5449 | 5455 | 5461 | 5467 | 5473 | 5479 | 5485 | 5491 | 5497 | 5503 | 5509 | 5515 | 5521 | 5527 | 5533 | 5539 | 5545 | 5551 | 5557 | 5563 | 5569 | 5575 | 5581 | 5587 | 5593 | 5599 | 5605 | 5611 | 5617 | 5623 | 5629 | 5635 | 5641 | 5647 | 5653 | 5659 | 5665 | 5671 | 5677 | 5683 | 5689 | 5695 | 5701 | 5707 | 5713 | 5719 | 5725 | 5731 | 5737 | 5743 | 5749 | 5755 | 5761 | 5767 | 5773 | 5779 | 5785 | 5791 | 5797 | 5803 | 5809 | 5815 | 5821 | 5827 | 5833 | 5839 | 5845 | 5851 | 5857 | 5863 | 5869 | 5875 | 5881 | 5887 | 5893 | 5899 | 5905 | 5911 | 5917 | 5923 | 5929 | 5935 | 5941 | 5947 | 5953 | 5959 | 5965 | 5971 | 5977 | 5983 | 5989 | 5995 | 6001 | 6007 | 6013 | 6019 | 6025 | 6031 | 6037 | 6043 | 6049 | 6055 | 6061 | 6067 | 6073 | 6079 | 6085 | 6091 | 6097 | 6103 | 6109 | 6115 | 6121 | 6127 | 6133 | 6139 | 6145 | 6151 | 6157 | 6163 | 6169 | 6175 | 6181 | 6187 | 6193 | 6199 | 6205 | 6211 | 6217 | 6223 | 6229 | 6235 | 6241 | 6247 | 6253 | 6259 | 6265 | 6271 | 6277 | 6283 | 6289 | 6295 | 6301 | 6307 | 6313 | 6319 | 6325 | 6331 | 6337 | 6343 | 6349 | 6355 | 6361 | 6367 | 6373 | 6379 | 6385 | 6391 | 6397 | 6403 | 6409 | 6415 | 6421 | 6427 | 6433 | 6439 | 6445 | 6451 | 6457 | 6463 | 6469 | 6475 | 6481 | 6487 | 6493 | 6499 | 6505 | 6511 | 6517 | 6523 | 6529 | 6535 | 6541 | 6547 | 6553 | 6559 | 6565 | 6571 | 6577 | 6583 | 6589 | 6595 | 6601 | 6607 | 6613 | 6619 | 6625 | 6631 | 6637 | 6643 | 6649 | 6655 | 6661 | 6667 | 6673 | 6679 | 6685 | 6691 | 6697 | 6703 | 6709 | 6715 | 6721 | 6727 | 6733 | 6739 | 6745 | 6751 | 6757 | 6763 | 6769 | 6775 | 6781 | 6787 | 6793 | 6799 | 6805 | 6811 | 6817 | 6823 | 6829 | 6835 | 6841 | 6847 | 6853 | 6859 | 6865 | 6871 | 6877 | 6883 | 6889 | 6895 | 6901 | 6907 | 6913 | 6919 | 6925 | 6931 | 6937 | 6943 | 6949 | 6955 | 6961 | 6967 | 6973 | 6979 | 6985 | 6991 | 6997 | 7003 | 7009 | 7015 | 7021 | 7027 | 7033 | 7039 | 7045 | 7051 | 7057 | 7063 | 7069 | 7075 | 7081 | 7087 | 7093 | 7099 | 7105 | 7111 | 7117 | 7123 | 7129 | 7135 | 7141 | 7147 | 7153 | 7159 | 7165 | 7171 | 7177 | 7183 | 7189 | 7195 | 7201 | 7207 | 7213 | 7219 | 7225 | 7231 | 7237 | 7243 | 7249 | 7255 | 7261 | 7267 | 7273 | 7279 | 7285 | 7291 | 7297 | 7303 | 7309 | 7315 | 7321 | 7327 | 7333 | 7339 | 7345 | 7351 | 7357 | 7363 | 7369 | 7375 | 7381 | 7387 | 7393 | 7399 | 7405 | 7411 | 7417 | 7423 | 7429 | 7435 | 7441 | 7447 | 7453 | 7459 | 7465 | 7471 | 7477 | 7483 | 7489 | 7495 | 7501 | 7507 | 7513 | 7519 | 7525 | 7531 | 7537 | 7543 | 7549 | 7555 | 7561 | 7567 | 7573 | 7579 | 7585 | 7591 | 7597 | 7603 | 7609 | 7615 | 7621 | 7627 | 7633 | 7639 | 7645 | 7651 | 7657 | 7663 | 7669 | 7675 | 7681 | 7687 | 7693 | 7699 | 7705 | 7711 | 7717 | 7723 | 7729 | 7735 | 7741 | 7747 | 7753 | 7759 | 7765 | 7771 | 7777 | 7783 | 7789 | 7795 | 7801 | 7807 | 7813 | 7819 | 7825 | 7831 | 7837 | 7843 | 7849 | 7855 | 7861 | 7867 | 7873 | 7879 | 7885 | 7891 | 7897 | 7903 | 7909 | 7915 | 7921 | 7927 | 7933 | 7939 | 7945 | 7951 | 7957 | 7963 | 7969 | 7975 | 7981 | 7987 | 7993 | 7999 | 8005 | 8011 | 8017 | 8023 | 8029 | 8035 | 8041 | 8047 | 8053 | 8059 | 8065 | 8071 | 8077 | 8083 | 8089 | 8095 | 8101 | 8107 | 8113 | 8119 | 8125 | 8131 | 8137 | 8143 | 8149 | 8155 | 8161 | 8167 | 8173 | 8179 | 8185 | 8191 | 8197 | 8203 | 8209 | 8215 | 8221 | 8227 | 8233 | 8239 | 8245 | 8251 | 8257 | 8263 | 8269 | 8275 | 8281 | 8287 | 8293 | 8299 | 8305 | 8311 | 8317 | 8323 | 8329 | 8335 | 8341 | 834 |
|--------|----|----|----|----|----|----|----|----|----|----|----|----|----|----|----|----|-----|-----|-----|-----|-----|-----|-----|-----|-----|-----|-----|-----|-----|-----|-----|-----|-----|-----|-----|-----|-----|-----|-----|-----|-----|-----|-----|-----|-----|-----|-----|-----|-----|-----|-----|-----|-----|-----|-----|-----|-----|-----|-----|-----|-----|-----|-----|-----|-----|-----|-----|-----|-----|-----|-----|-----|-----|-----|-----|-----|-----|-----|-----|-----|-----|-----|-----|-----|-----|-----|-----|-----|-----|-----|-----|-----|-----|-----|-----|-----|-----|-----|-----|-----|-----|-----|-----|-----|-----|-----|-----|-----|-----|-----|-----|-----|-----|-----|-----|-----|-----|-----|-----|-----|-----|-----|-----|-----|-----|-----|-----|-----|-----|-----|-----|-----|-----|-----|-----|-----|-----|-----|-----|-----|-----|-----|-----|-----|-----|-----|-----|-----|-----|-----|-----|-----|-----|-----|-----|-----|-----|-----|-----|-----|-----|-----|-----|-----|-----|-----|------|------|------|------|------|------|------|------|------|------|------|------|------|------|------|------|------|------|------|------|------|------|------|------|------|------|------|------|------|------|------|------|------|------|------|------|------|------|------|------|------|------|------|------|------|------|------|------|------|------|------|------|------|------|------|------|------|------|------|------|------|------|------|------|------|------|------|------|------|------|------|------|------|------|------|------|------|------|------|------|------|------|------|------|------|------|------|------|------|------|------|------|------|------|------|------|------|------|------|------|------|------|------|------|------|------|------|------|------|------|------|------|------|------|------|------|------|------|------|------|------|------|------|------|------|------|------|------|------|------|------|------|------|------|------|------|------|------|------|------|------|------|------|------|------|------|------|------|------|------|------|------|------|------|------|------|------|------|------|------|------|------|------|------|------|------|------|------|------|------|------|------|------|------|------|------|------|------|------|------|------|------|------|------|------|------|------|------|------|------|------|------|------|------|------|------|------|------|------|------|------|------|------|------|------|------|------|------|------|------|------|------|------|------|------|------|------|------|------|------|------|------|------|------|------|------|------|------|------|------|------|------|------|------|------|------|------|------|------|------|------|------|------|------|------|------|------|------|------|------|------|------|------|------|------|------|------|------|------|------|------|------|------|------|------|------|------|------|------|------|------|------|------|------|------|------|------|------|------|------|------|------|------|------|------|------|------|------|------|------|------|------|------|------|------|------|------|------|------|------|------|------|------|------|------|------|------|------|------|------|------|------|------|------|------|------|------|------|------|------|------|------|------|------|------|------|------|------|------|------|------|------|------|------|------|------|------|------|------|------|------|------|------|------|------|------|------|------|------|------|------|------|------|------|------|------|------|------|------|------|------|------|------|------|------|------|------|------|------|------|------|------|------|------|------|------|------|------|------|------|------|------|------|------|------|------|------|------|------|------|------|------|------|------|------|------|------|------|------|------|------|------|------|------|------|------|------|------|------|------|------|------|------|------|------|------|------|------|------|------|------|------|------|------|------|------|------|------|------|------|------|------|------|------|------|------|------|------|------|------|------|------|------|------|------|------|------|------|------|------|------|------|------|------|------|------|------|------|------|------|------|------|------|------|------|------|------|------|------|------|------|------|------|------|------|------|------|------|------|------|------|------|------|------|------|------|------|------|------|------|------|------|------|------|------|------|------|------|------|------|------|------|------|------|------|------|------|------|------|------|------|------|------|------|------|------|------|------|------|------|------|------|------|------|------|------|------|------|------|------|------|------|------|------|------|------|------|------|------|------|------|------|------|------|------|------|------|------|------|------|------|------|------|------|------|------|------|------|------|------|------|------|------|------|------|------|------|------|------|------|------|------|------|------|------|------|------|------|------|------|------|------|------|------|------|------|------|------|------|------|------|------|------|------|------|------|------|------|------|------|------|------|------|------|------|------|------|------|------|------|------|------|------|------|------|------|------|------|------|------|------|------|------|------|------|------|------|------|------|------|------|------|------|------|------|------|------|------|------|------|------|------|------|------|------|------|------|------|------|------|------|------|------|------|------|------|------|------|------|------|------|------|------|------|------|------|------|------|------|------|------|------|------|------|------|------|------|------|------|------|------|------|------|------|------|------|------|------|------|------|------|------|------|------|------|------|------|------|------|------|------|------|------|------|------|------|------|------|------|------|------|------|------|------|------|------|------|------|------|------|------|------|------|------|------|------|------|------|------|------|------|------|------|------|------|------|------|------|------|------|------|------|------|------|------|------|------|------|------|------|------|------|------|------|------|------|------|------|------|------|------|------|------|------|------|------|------|------|------|------|------|------|------|------|------|------|------|------|------|------|------|------|------|------|------|------|------|------|------|------|------|------|------|------|------|------|------|------|------|------|------|------|------|------|------|------|------|------|------|------|------|------|------|------|------|------|------|------|------|------|------|------|------|------|------|------|------|------|------|------|------|------|------|------|------|------|------|------|------|------|------|------|------|------|------|------|------|------|------|------|------|------|------|------|------|------|------|------|------|------|------|------|------|------|------|------|------|------|------|------|------|------|------|------|------|------|------|------|------|------|------|------|------|------|------|------|------|------|------|------|------|------|------|------|------|------|------|------|------|------|------|------|------|------|------|------|------|------|------|------|------|------|------|------|------|------|------|------|------|------|------|------|------|------|------|------|------|------|------|------|------|------|------|------|------|------|------|------|------|------|------|------|------|------|------|------|------|------|------|------|------|------|------|------|------|------|------|------|------|------|------|------|------|------|------|------|------|------|------|------|------|------|------|------|------|------|------|------|------|------|------|------|------|------|------|------|------|------|------|------|------|------|------|------|------|------|------|------|------|------|------|------|------|------|------|------|------|------|------|------|------|------|------|------|------|------|------|------|------|------|------|------|------|------|------|------|------|------|------|------|------|------|------|------|------|------|------|------|------|------|------|------|------|------|------|------|------|------|------|------|------|------|------|------|------|------|------|------|------|------|------|------|------|------|------|------|------|------|------|------|------|------|------|------|------|------|------|------|------|------|------|------|------|------|------|------|------|------|------|------|------|------|------|------|------|------|------|------|------|------|------|------|------|------|------|------|------|------|------|------|------|------|------|------|------|------|------|------|------|------|------|------|------|------|------|------|------|------|------|------|------|------|------|------|------|------|------|------|------|------|------|------|------|------|------|------|------|------|------|------|------|------|------|------|------|------|------|------|------|------|------|------|------|------|------|------|------|------|------|------|------|------|------|------|------|------|------|------|------|------|------|------|------|------|------|------|------|------|------|------|------|------|------|------|------|------|------|------|------|------|------|------|------|------|------|------|------|------|------|------|------|------|------|------|------|------|------|------|------|------|------|------|------|------|-----|

Table S7. Mean normalized read counts, fold change (compared to NF hearts mean value) and P values of miRNAs that are differentially expressed in ICM LV samples

| miRNA             | NF mean (PMMR+0.1) | Fold Change (vs NF) | ICM pre-LVAD mean (PMMR+0.1) | Fold Change (vs NF) | P value (NF vs ICM) | ICM post-LVAD mean (PMMR+0.1) | Fold Change (vs NF) | P value (ICM pre vs post LVAD) | Normalized by LVAD | Improved by LVAD |
|-------------------|--------------------|---------------------|------------------------------|---------------------|---------------------|-------------------------------|---------------------|--------------------------------|--------------------|------------------|
| hsa-miR-365a-3p   | 136.7              | 1.0                 | 95.2                         | -1.4                | 5.6E-03             | 129.4                         | -1.1                | 7.25E-04                       | ✓                  | ✓                |
| hsa-miR-378a-3p   | 29061.7            | 1.0                 | 19725.1                      | -1.5                | 6.1E-04             | 26429.4                       | -1.1                | 2.78E-02                       | ✓                  | ✓                |
| hsa-miR-378e      | 9.1                | 1.0                 | 5.8                          | -1.6                | 6.7E-03             | 7.6                           | -1.2                | 5.71E-03                       |                    | ✓                |
| hsa-miR-665       | 2.5                | 1.0                 | 1.5                          | -1.7                | 4.4E-03             | 2.1                           | -1.1                | 4.61E-02                       |                    | ✓                |
| hsa-miR-302a-3p   | 12.5               | 1.0                 | 6.9                          | -1.8                | 1.2E-02             | 10.7                          | -1.2                | 2.09E-02                       |                    | ✓                |
| hsa-miR-429       | 0.2                | 1.0                 | 0.1                          | -2.3                | 2.5E-02             | 0.2                           | -1.2                | 1.01E-02                       |                    | ✓                |
| hsa-miR-378f      | 21.0               | 1.0                 | 8.4                          | -2.5                | 1.3E-03             | 12.8                          | -1.6                | 2.95E-02                       |                    | ✓                |
| hsa-miR-144-5p    | 10.5               | 1.0                 | 90.5                         | 8.6                 | 1.7E-03             | 61.8                          | 5.9                 | 4.69E-01                       |                    |                  |
| hsa-miR-182-5p    | 22.3               | 1.0                 | 189.4                        | 8.5                 | 5.9E-05             | 117.5                         | 5.3                 | 2.13E-01                       |                    |                  |
| hsa-miR-183-5p    | 2.8                | 1.0                 | 19.2                         | 6.8                 | 3.5E-03             | 11.7                          | 4.1                 | 4.37E-01                       |                    |                  |
| hsa-miR-451a      | 219.2              | 1.0                 | 1477.8                       | 6.7                 | 3.1E-03             | 1080.6                        | 4.9                 | 5.33E-01                       |                    |                  |
| hsa-miR-144-3p    | 13.8               | 1.0                 | 88.2                         | 6.4                 | 3.1E-03             | 59.6                          | 4.3                 | 3.78E-01                       |                    |                  |
| hsa-miR-184       | 1.0                | 1.0                 | 5.9                          | 5.6                 | 9.5E-03             | 3.7                           | 3.6                 | 4.18E-01                       |                    |                  |
| hsa-miR-4800-3p   | 1.6                | 1.0                 | 7.6                          | 4.9                 | 3.2E-02             | 4.2                           | 2.7                 | 1.84E-01                       |                    |                  |
| hsa-miR-34c-5p    | 1.3                | 1.0                 | 5.8                          | 4.6                 | 6.6E-05             | 4.9                           | 3.9                 | 8.87E-01                       |                    |                  |
| hsa-miR-34c-3p    | 0.1                | 1.0                 | 0.4                          | 3.9                 | 3.0E-03             | 0.4                           | 4.2                 | 1.85E-01                       |                    |                  |
| hsa-miR-1246      | 1.5                | 1.0                 | 5.0                          | 3.4                 | 2.9E-02             | 9.7                           | 6.5                 | 9.95E-01                       |                    |                  |
| hsa-miR-3938      | 0.1                | 1.0                 | 0.3                          | 3.3                 | 1.4E-02             | 0.4                           | 3.8                 | 5.87E-01                       |                    |                  |
| hsa-miR-190b      | 1.2                | 1.0                 | 3.8                          | 3.3                 | 6.3E-03             | 3.3                           | 2.8                 | 8.72E-01                       |                    |                  |
| hsa-miR-5002-5p   | 0.2                | 1.0                 | 0.5                          | 3.2                 | 1.6E-02             | 0.4                           | 2.7                 | 2.82E-01                       |                    |                  |
| hsa-miR-1285-5p   | 0.1                | 1.0                 | 0.4                          | 3.0                 | 2.5E-02             | 0.2                           | 1.5                 | 1.97E-01                       |                    |                  |
| hsa-miR-155-5p    | 28.0               | 1.0                 | 70.2                         | 2.5                 | 3.1E-05             | 59.9                          | 2.1                 | 7.28E-01                       |                    |                  |
| hsa-miR-4792      | 16.2               | 1.0                 | 40.4                         | 2.5                 | 3.9E-02             | 27.3                          | 1.7                 | 1.93E-01                       |                    |                  |
| hsa-miR-301b      | 11.0               | 1.0                 | 27.2                         | 2.5                 | 2.8E-03             | 17.5                          | 1.6                 | 1.24E-01                       |                    |                  |
| hsa-miR-708-5p    | 5.7                | 1.0                 | 13.6                         | 2.4                 | 1.9E-04             | 14.9                          | 2.6                 | 4.06E-01                       |                    |                  |
| hsa-miR-542-3p    | 27.8               | 1.0                 | 64.8                         | 2.3                 | 6.2E-03             | 50.9                          | 1.8                 | 2.67E-01                       |                    |                  |
| hsa-miR-545-5p    | 0.3                | 1.0                 | 0.7                          | 2.3                 | 1.7E-03             | 0.4                           | 1.2                 | 1.13E-01                       |                    |                  |
| hsa-miR-34b-3p    | 0.1                | 1.0                 | 0.3                          | 2.2                 | 2.6E-02             | 0.3                           | 1.9                 | 8.49E-01                       |                    |                  |
| hsa-miR-125b-1-3p | 45.0               | 1.0                 | 99.9                         | 2.2                 | 2.0E-03             | 91.4                          | 2.0                 | 8.41E-01                       |                    |                  |
| hsa-miR-3614-5p   | 0.5                | 1.0                 | 1.0                          | 2.2                 | 5.0E-03             | 1.0                           | 2.1                 | 9.53E-01                       |                    |                  |
| hsa-miR-548d-5p   | 0.8                | 1.0                 | 1.8                          | 2.2                 | 4.1E-03             | 1.7                           | 2.1                 | 7.87E-01                       |                    |                  |
| hsa-miR-141-3p    | 2.3                | 1.0                 | 4.9                          | 2.2                 | 3.6E-03             | 4.6                           | 2.0                 | 8.05E-01                       |                    |                  |
| hsa-miR-320b      | 1.1                | 1.0                 | 2.4                          | 2.2                 | 7.9E-05             | 2.0                           | 1.8                 | 9.14E-01                       |                    |                  |
| hsa-miR-548h-3p   | 0.6                | 1.0                 | 1.2                          | 2.1                 | 4.3E-02             | 1.8                           | 3.3                 | 1.68E-01                       |                    |                  |
| hsa-miR-5701      | 2.8                | 1.0                 | 5.7                          | 2.0                 | 1.6E-02             | 7.6                           | 2.7                 | 1.55E-02                       |                    |                  |
| hsa-miR-195-3p    | 15.8               | 1.0                 | 31.4                         | 2.0                 | 1.2E-05             | 34.6                          | 2.2                 | 2.20E-01                       |                    |                  |
| hsa-miR-130b-5p   | 7.1                | 1.0                 | 13.7                         | 1.9                 | 1.2E-02             | 13.4                          | 1.9                 | 7.07E-01                       |                    |                  |
| hsa-miR-493-3p    | 5.1                | 1.0                 | 9.9                          | 1.9                 | 5.3E-04             | 10.0                          | 1.9                 | 4.41E-01                       |                    |                  |
| hsa-miR-154-5p    | 1.1                | 1.0                 | 2.1                          | 1.9                 | 9.6E-03             | 2.4                           | 2.2                 | 4.09E-01                       |                    |                  |
| hsa-miR-21-5p     | 4320.7             | 1.0                 | 8069.4                       | 1.9                 | 2.8E-03             | 7256.9                        | 1.7                 | 7.48E-01                       |                    |                  |
| hsa-miR-5010-3p   | 0.6                | 1.0                 | 1.0                          | 1.8                 | 4.4E-02             | 1.1                           | 1.9                 | 9.92E-01                       |                    |                  |
| hsa-miR-377-5p    | 1.1                | 1.0                 | 2.0                          | 1.8                 | 2.8E-02             | 1.9                           | 1.6                 | 9.10E-01                       |                    |                  |
| hsa-miR-34b-5p    | 0.5                | 1.0                 | 0.9                          | 1.8                 | 3.9E-02             | 0.8                           | 1.6                 | 8.03E-01                       |                    |                  |
| hsa-miR-432-5p    | 7.1                | 1.0                 | 12.7                         | 1.8                 | 2.0E-03             | 11.0                          | 1.5                 | 3.73E-01                       |                    |                  |
| hsa-miR-106b-3p   | 16.6               | 1.0                 | 29.1                         | 1.8                 | 2.2E-04             | 29.9                          | 1.8                 | 3.27E-01                       |                    |                  |
| hsa-miR-339-5p    | 5.5                | 1.0                 | 9.6                          | 1.8                 | 1.3E-03             | 9.7                           | 1.8                 | 4.21E-01                       |                    |                  |
| hsa-miR-199a-3p   | 2488.3             | 1.0                 | 4358.9                       | 1.8                 | 1.7E-03             | 4385.1                        | 1.8                 | 9.95E-01                       |                    |                  |
| hsa-miR-382-3p    | 1.5                | 1.0                 | 2.7                          | 1.8                 | 4.4E-02             | 2.5                           | 1.6                 | 4.96E-01                       |                    |                  |
| hsa-miR-708-3p    | 7.0                | 1.0                 | 12.2                         | 1.7                 | 4.9E-04             | 13.5                          | 1.9                 | 8.97E-02                       |                    |                  |
| hsa-miR-301a-5p   | 0.6                | 1.0                 | 1.1                          | 1.7                 | 1.5E-02             | 0.8                           | 1.4                 | 1.84E-01                       |                    |                  |
| hsa-miR-130b-3p   | 27.8               | 1.0                 | 47.7                         | 1.7                 | 8.8E-04             | 40.3                          | 1.5                 | 2.03E-01                       |                    |                  |
| hsa-miR-330-5p    | 7.3                | 1.0                 | 12.5                         | 1.7                 | 9.2E-05             | 10.4                          | 1.4                 | 3.60E-01                       |                    |                  |
| hsa-miR-199b-5p   | 571.3              | 1.0                 | 976.4                        | 1.7                 | 7.7E-03             | 931.3                         | 1.6                 | 8.55E-01                       |                    |                  |
| hsa-miR-214-5p    | 24.3               | 1.0                 | 41.4                         | 1.7                 | 1.7E-02             | 44.8                          | 1.8                 | 6.16E-01                       |                    |                  |
| hsa-miR-4775      | 1.3                | 1.0                 | 2.3                          | 1.7                 | 6.1E-03             | 1.9                           | 1.4                 | 1.25E-01                       |                    |                  |
| hsa-miR-342-5p    | 1.6                | 1.0                 | 2.7                          | 1.7                 | 4.8E-02             | 2.9                           | 1.8                 | 1.68E-01                       |                    |                  |
| hsa-miR-195-5p    | 480.2              | 1.0                 | 798.6                        | 1.7                 | 6.7E-03             | 934.7                         | 1.9                 | 8.86E-01                       |                    |                  |
| hsa-miR-769-5p    | 129.6              | 1.0                 | 215.2                        | 1.7                 | 3.3E-05             | 210.4                         | 1.6                 | 3.17E-01                       |                    |                  |
| hsa-miR-454-5p    | 2.9                | 1.0                 | 4.8                          | 1.7                 | 1.0E-02             | 4.7                           | 1.6                 | 9.43E-01                       |                    |                  |
| hsa-miR-1277-5p   | 3.0                | 1.0                 | 4.9                          | 1.6                 | 4.1E-02             | 4.8                           | 1.6                 | 3.46E-01                       |                    |                  |
| hsa-miR-136-5p    | 27.7               | 1.0                 | 44.3                         | 1.6                 | 3.0E-03             | 45.4                          | 1.6                 | 7.65E-01                       |                    |                  |
| hsa-miR-153       | 11.5               | 1.0                 | 18.2                         | 1.6                 | 4.8E-02             | 19.6                          | 1.7                 | 9.63E-01                       |                    |                  |
| hsa-miR-106b-5p   | 28.0               | 1.0                 | 44.3                         | 1.6                 | 3.4E-04             | 46.5                          | 1.7                 | 9.77E-01                       |                    |                  |
| hsa-miR-625-5p    | 1.8                | 1.0                 | 2.8                          | 1.6                 | 9.7E-03             | 3.3                           | 1.8                 | 2.58E-01                       |                    |                  |
| hsa-miR-210       | 65.9               | 1.0                 | 103.1                        | 1.6                 | 4.1E-03             | 93.0                          | 1.4                 | 3.62E-01                       |                    |                  |
| hsa-miR-127-5p    | 4.2                | 1.0                 | 6.5                          | 1.6                 | 3.2E-02             | 6.5                           | 1.5                 | 7.44E-01                       |                    |                  |
| hsa-miR-370       | 1.8                | 1.0                 | 2.8                          | 1.5                 | 2.7E-02             | 3.4                           | 1.9                 | 4.03E-01                       |                    |                  |
| hsa-miR-497-5p    | 192.0              | 1.0                 | 294.4                        | 1.5                 | 3.2E-03             | 319.4                         | 1.7                 | 7.26E-01                       |                    |                  |
| hsa-miR-760       | 1.1                | 1.0                 | 1.7                          | 1.5                 | 3.7E-02             | 1.7                           | 1.5                 | 4.57E-01                       |                    |                  |
| hsa-miR-301a-3p   | 233.7              | 1.0                 | 357.1                        | 1.5                 | 1.9E-02             | 297.6                         | 1.3                 | 3.72E-02                       |                    |                  |
| hsa-miR-218-5p    | 52.6               | 1.0                 | 79.7                         | 1.5                 | 2.8E-02             | 84.6                          | 1.6                 | 6.44E-01                       |                    |                  |
| hsa-miR-487b      | 8.0                | 1.0                 | 12.0                         | 1.5                 | 6.1E-03             | 10.3                          | 1.3                 | 3.12E-01                       |                    |                  |
| hsa-miR-324-5p    | 9.5                | 1.0                 | 14.2                         | 1.5                 | 3.1E-02             | 17.5                          | 1.8                 | 9.85E-01                       |                    |                  |
| hsa-miR-27b-5p    | 91.4               | 1.0                 | 135.7                        | 1.5                 | 1.0E-02             | 150.6                         | 1.6                 | 3.53E-02                       |                    |                  |
| hsa-miR-181b-5p   | 509.2              | 1.0                 | 746.7                        | 1.5                 | 8.3E-04             | 767.6                         | 1.5                 | 9.92E-01                       |                    |                  |
| hsa-miR-1285-3p   | 9.0                | 1.0                 | 13.0                         | 1.4                 | 4.3E-02             | 12.9                          | 1.4                 | 9.94E-01                       |                    |                  |
| hsa-miR-320a      | 385.2              | 1.0                 | 548.7                        | 1.4                 | 1.5E-03             | 520.9                         | 1.4                 | 8.59E-01                       |                    |                  |
| hsa-miR-382-5p    | 2.9                | 1.0                 | 4.2                          | 1.4                 | 2.1E-02             | 4.0                           | 1.4                 | 6.81E-01                       |                    |                  |
| hsa-miR-744-5p    | 26.4               | 1.0                 | 37.2                         | 1.4                 | 1.6E-02             | 46.1                          | 1.7                 | 1.41E-03                       |                    |                  |
| hsa-miR-4301      | 99.9               | 1.0                 | 140.4                        | 1.4                 | 6.0E-03             | 143.7                         | 1.4                 | 6.76E-01                       |                    |                  |
| hsa-miR-425-5p    | 45.4               | 1.0                 | 63.5                         | 1.4                 | 9.2E-03             | 58.6                          | 1.3                 | 2.12E-01                       |                    |                  |
| hsa-miR-101-3p    | 3458.7             | 1.0                 | 4814.0                       | 1.4                 | 2.9E-02             | 5666.7                        | 1.6                 | 4.60E-01                       |                    |                  |
| hsa-miR-324-3p    | 4.1                | 1.0                 | 5.6                          | 1.4                 | 1.3E-02             | 7.0                           | 1.7                 | 8.26E-02                       |                    |                  |
| hsa-miR-181c-5p   | 806.9              | 1.0                 | 1111.9                       | 1.4                 | 4.8E-06             | 1127.3                        | 1.4                 | 7.90E-01                       |                    |                  |
| hsa-miR-2355-5p   | 8.0                | 1.0                 | 11.0                         | 1.4                 | 2.8E-03             | 10.3                          | 1.3                 | 9.52E-01                       |                    |                  |
| hsa-miR-27a-3p    | 2659.4             | 1.0                 | 3645.5                       | 1.4                 | 7.5E-06             | 3368.6                        | 1.3                 | 3.76E-01                       |                    |                  |
| hsa-miR-381       | 202.2              | 1.0                 | 276.7                        | 1.4                 | 1.9E-02             | 293.4                         | 1.5                 | 1.61E-01                       |                    |                  |

|                   |         |     |         |      |         |         |      |          |  |  |
|-------------------|---------|-----|---------|------|---------|---------|------|----------|--|--|
| hsa-miR-181a-2-3p | 237.5   | 1.0 | 323.8   | 1.4  | 1.3E-02 | 390.9   | 1.6  | 6.83E-02 |  |  |
| hsa-miR-140-3p    | 909.7   | 1.0 | 1237.7  | 1.4  | 6.7E-03 | 1341.0  | 1.5  | 9.46E-01 |  |  |
| hsa-miR-887       | 36.0    | 1.0 | 48.8    | 1.4  | 3.1E-02 | 47.8    | 1.3  | 5.96E-01 |  |  |
| hsa-miR-423-3p    | 602.4   | 1.0 | 802.9   | 1.3  | 3.7E-02 | 885.5   | 1.5  | 2.71E-01 |  |  |
| hsa-miR-92b-3p    | 841.0   | 1.0 | 1120.0  | 1.3  | 2.1E-02 | 959.7   | 1.1  | 4.61E-01 |  |  |
| hsa-miR-181d      | 80.0    | 1.0 | 106.0   | 1.3  | 7.9E-04 | 103.7   | 1.3  | 6.78E-01 |  |  |
| hsa-miR-99a-3p    | 34.4    | 1.0 | 45.6    | 1.3  | 7.4E-03 | 56.7    | 1.6  | 2.09E-01 |  |  |
| hsa-let-7e-3p     | 11.4    | 1.0 | 15.0    | 1.3  | 1.7E-02 | 15.2    | 1.3  | 2.98E-01 |  |  |
| hsa-miR-328       | 59.5    | 1.0 | 78.2    | 1.3  | 3.9E-03 | 78.1    | 1.3  | 5.31E-01 |  |  |
| hsa-miR-16-5p     | 3300.0  | 1.0 | 4305.0  | 1.3  | 6.0E-03 | 4421.5  | 1.3  | 6.88E-01 |  |  |
| hsa-miR-421       | 108.5   | 1.0 | 141.4   | 1.3  | 4.4E-02 | 131.8   | 1.2  | 1.58E-01 |  |  |
| hsa-miR-136-3p    | 127.4   | 1.0 | 164.2   | 1.3  | 3.5E-02 | 179.5   | 1.4  | 3.57E-01 |  |  |
| hsa-miR-23a-3p    | 1178.5  | 1.0 | 1518.4  | 1.3  | 4.6E-03 | 1611.4  | 1.4  | 9.52E-01 |  |  |
| hsa-miR-24-2-5p   | 11.5    | 1.0 | 14.8    | 1.3  | 2.8E-02 | 12.7    | 1.1  | 1.11E-01 |  |  |
| hsa-miR-148b-5p   | 12.0    | 1.0 | 15.3    | 1.3  | 8.4E-03 | 17.5    | 1.5  | 6.17E-02 |  |  |
| hsa-let-7i-5p     | 2216.2  | 1.0 | 2793.8  | 1.3  | 2.2E-03 | 2751.1  | 1.2  | 9.20E-01 |  |  |
| hsa-let-7i-3p     | 14.9    | 1.0 | 18.6    | 1.2  | 4.5E-02 | 20.0    | 1.3  | 7.40E-01 |  |  |
| hsa-miR-130a-3p   | 449.5   | 1.0 | 554.1   | 1.2  | 3.8E-02 | 600.1   | 1.3  | 8.92E-01 |  |  |
| hsa-miR-103a-3p   | 1372.4  | 1.0 | 1660.7  | 1.2  | 2.5E-03 | 1662.3  | 1.2  | 5.71E-01 |  |  |
| hsa-miR-181a-5p   | 16819.9 | 1.0 | 20291.6 | 1.2  | 4.2E-02 | 22067.7 | 1.3  | 5.34E-01 |  |  |
| hsa-miR-92a-3p    | 9577.0  | 1.0 | 7613.8  | -1.3 | 1.6E-04 | 8948.0  | -1.1 | 9.55E-03 |  |  |
| hsa-miR-125a-3p   | 10.4    | 1.0 | 8.1     | -1.3 | 9.5E-03 | 8.2     | -1.3 | 2.93E-01 |  |  |
| hsa-miR-151a-5p   | 3973.9  | 1.0 | 3048.7  | -1.3 | 1.1E-02 | 3195.4  | -1.2 | 2.16E-01 |  |  |
| hsa-miR-133a      | 59310.6 | 1.0 | 45226.9 | -1.3 | 2.6E-02 | 48558.7 | -1.2 | 6.23E-01 |  |  |
| hsa-miR-361-5p    | 284.7   | 1.0 | 214.2   | -1.3 | 3.0E-03 | 234.5   | -1.2 | 7.39E-01 |  |  |
| hsa-miR-499a-5p   | 3145.3  | 1.0 | 2242.6  | -1.4 | 4.1E-02 | 2548.8  | -1.2 | 5.25E-01 |  |  |
| hsa-miR-491-3p    | 1.0     | 1.0 | 0.7     | -1.4 | 3.9E-02 | 1.0     | -1.0 | 6.13E-02 |  |  |
| hsa-miR-720       | 14.0    | 1.0 | 9.7     | -1.4 | 3.4E-02 | 11.1    | -1.3 | 8.05E-01 |  |  |
| hsa-miR-32-3p     | 5.7     | 1.0 | 3.9     | -1.5 | 1.4E-02 | 3.6     | -1.6 | 5.80E-01 |  |  |
| hsa-miR-188-5p    | 2.9     | 1.0 | 2.0     | -1.5 | 3.2E-02 | 1.9     | -1.5 | 3.73E-01 |  |  |
| hsa-miR-500a-3p   | 215.1   | 1.0 | 138.1   | -1.6 | 1.1E-02 | 139.7   | -1.5 | 5.90E-01 |  |  |
| hsa-miR-29c-5p    | 102.7   | 1.0 | 64.9    | -1.6 | 1.1E-02 | 79.8    | -1.3 | 4.03E-01 |  |  |
| hsa-miR-17-5p     | 121.4   | 1.0 | 72.5    | -1.7 | 7.2E-04 | 81.4    | -1.5 | 5.83E-01 |  |  |
| hsa-miR-302d-3p   | 16.1    | 1.0 | 9.6     | -1.7 | 2.2E-02 | 14.4    | -1.1 | 2.37E-01 |  |  |
| hsa-miR-193a-5p   | 234.4   | 1.0 | 138.3   | -1.7 | 3.2E-03 | 165.3   | -1.4 | 9.71E-02 |  |  |
| hsa-miR-338-5p    | 8.1     | 1.0 | 4.8     | -1.7 | 3.1E-02 | 5.9     | -1.4 | 2.76E-01 |  |  |
| hsa-miR-486-5p    | 49910.5 | 1.0 | 27917.8 | -1.8 | 9.6E-03 | 33492.0 | -1.5 | 2.93E-01 |  |  |
| hsa-miR-490-5p    | 14.2    | 1.0 | 7.9     | -1.8 | 5.3E-03 | 11.3    | -1.3 | 3.35E-01 |  |  |
| hsa-miR-99a-5p    | 3505.1  | 1.0 | 1937.5  | -1.8 | 1.5E-02 | 2252.4  | -1.6 | 2.85E-01 |  |  |
| hsa-miR-378i      | 4.2     | 1.0 | 2.3     | -1.8 | 4.4E-03 | 3.1     | -1.4 | 8.18E-01 |  |  |
| hsa-miR-584-5p    | 96.4    | 1.0 | 52.7    | -1.8 | 1.2E-02 | 71.1    | -1.4 | 2.01E-01 |  |  |
| hsa-miR-362-5p    | 52.4    | 1.0 | 28.5    | -1.8 | 2.9E-04 | 28.6    | -1.8 | 3.47E-01 |  |  |
| hsa-miR-150-5p    | 276.8   | 1.0 | 147.5   | -1.9 | 1.4E-02 | 201.3   | -1.4 | 1.34E-01 |  |  |
| hsa-miR-20a-5p    | 313.3   | 1.0 | 164.6   | -1.9 | 1.1E-03 | 188.0   | -1.7 | 5.17E-01 |  |  |
| hsa-miR-502-3p    | 68.2    | 1.0 | 35.8    | -1.9 | 2.0E-02 | 39.9    | -1.7 | 4.36E-01 |  |  |
| hsa-miR-125a-5p   | 19849.1 | 1.0 | 10178.6 | -2.0 | 1.5E-02 | 10984.7 | -1.8 | 5.11E-01 |  |  |
| hsa-miR-99b-5p    | 23661.6 | 1.0 | 11546.9 | -2.0 | 3.5E-02 | 12298.2 | -1.9 | 5.60E-01 |  |  |
| hsa-miR-1323      | 0.5     | 1.0 | 0.3     | -2.1 | 2.7E-02 | 0.3     | -1.6 | 1.66E-01 |  |  |
| hsa-miR-4786-5p   | 0.9     | 1.0 | 0.4     | -2.1 | 2.1E-02 | 0.6     | -1.5 | 2.51E-01 |  |  |
| hsa-miR-483-5p    | 14.6    | 1.0 | 6.8     | -2.2 | 9.1E-04 | 7.9     | -1.9 | 7.35E-01 |  |  |
| hsa-miR-2116-3p   | 0.3     | 1.0 | 0.1     | -2.2 | 3.5E-02 | 0.2     | -1.5 | 3.40E-01 |  |  |
| hsa-miR-1303      | 3.4     | 1.0 | 1.5     | -2.3 | 1.7E-02 | 2.0     | -1.8 | 2.63E-01 |  |  |
| hsa-miR-519c-3p   | 0.8     | 1.0 | 0.3     | -2.3 | 2.8E-02 | 0.3     | -2.5 | 9.44E-01 |  |  |
| hsa-miR-1301      | 28.7    | 1.0 | 12.2    | -2.3 | 6.8E-03 | 13.8    | -2.1 | 5.80E-01 |  |  |
| hsa-miR-9-3p      | 0.5     | 1.0 | 0.2     | -2.4 | 3.1E-02 | 0.6     | 1.2  | 9.48E-02 |  |  |
| hsa-miR-138-5p    | 0.9     | 1.0 | 0.4     | -2.4 | 2.6E-02 | 0.6     | -1.4 | 2.70E-01 |  |  |
| hsa-miR-501-3p    | 250.9   | 1.0 | 101.6   | -2.5 | 1.7E-02 | 106.3   | -2.4 | 5.58E-01 |  |  |
| hsa-miR-221-3p    | 2148.9  | 1.0 | 840.6   | -2.6 | 4.6E-05 | 967.8   | -2.2 | 3.86E-01 |  |  |
| hsa-miR-675-5p    | 6.0     | 1.0 | 2.3     | -2.6 | 1.7E-03 | 2.3     | -2.6 | 8.76E-01 |  |  |
| hsa-miR-548l      | 0.3     | 1.0 | 0.1     | -2.6 | 3.1E-02 | 0.1     | -2.1 | 2.91E-01 |  |  |
| hsa-miR-222-3p    | 1074.1  | 1.0 | 409.8   | -2.6 | 2.5E-04 | 515.1   | -2.1 | 3.30E-01 |  |  |
| hsa-miR-548ao-3p  | 0.4     | 1.0 | 0.2     | -2.7 | 8.4E-03 | 0.3     | -1.2 | 1.18E-01 |  |  |
| hsa-miR-520c-3p   | 1.0     | 1.0 | 0.4     | -2.8 | 8.4E-03 | 0.4     | -2.7 | 7.84E-01 |  |  |
| hsa-miR-9-5p      | 59.8    | 1.0 | 21.2    | -2.8 | 6.4E-06 | 41.6    | -1.4 | 1.04E-01 |  |  |
| hsa-miR-1271-5p   | 362.6   | 1.0 | 126.9   | -2.9 | 1.6E-02 | 142.2   | -2.5 | 5.82E-01 |  |  |
| hsa-miR-106a-5p   | 4.0     | 1.0 | 1.4     | -2.9 | 1.9E-02 | 1.9     | -2.1 | 2.60E-01 |  |  |
| hsa-miR-1254      | 0.3     | 1.0 | 0.1     | -3.0 | 1.9E-02 | 0.4     | 1.4  | 1.15E-02 |  |  |
| hsa-miR-409-5p    | 27.4    | 1.0 | 9.0     | -3.0 | 1.3E-02 | 9.5     | -2.9 | 5.90E-01 |  |  |
| hsa-miR-378b      | 136.5   | 1.0 | 43.8    | -3.1 | 2.0E-02 | 57.2    | -2.4 | 8.16E-01 |  |  |
| hsa-miR-3679-5p   | 0.5     | 1.0 | 0.2     | -3.3 | 4.1E-02 | 0.1     | -4.1 | 8.72E-01 |  |  |
| hsa-miR-4441      | 0.5     | 1.0 | 0.1     | -3.5 | 3.1E-02 | 0.1     | -3.7 | 5.83E-01 |  |  |
| hsa-miR-4797-3p   | 0.8     | 1.0 | 0.2     | -5.1 | 3.5E-02 | 0.4     | -2.2 | 4.53E-01 |  |  |
| hsa-miR-221-5p    | 153.6   | 1.0 | 26.6    | -5.8 | 6.7E-04 | 36.1    | -4.3 | 1.17E-01 |  |  |

Table S8. Mean normalized read counts, fold change (compared to NF hearts mean value) and P values of miRNAs that are differentially expressed in NICM LV samples

| miRNA             | NF mean (PMMR+0.1) | Fold Change (vs NF) | NICM pre-LVAD mean (PMMR+0.1) | Fold Change (vs NF) | P value (NF vs NICM) | NICM post-LVAD mean (PMMR+0.1) | Fold Change (vs NF) | P value (NICM pre vs post LVAD) | Normalized by LVAD | Improved by LVAD |
|-------------------|--------------------|---------------------|-------------------------------|---------------------|----------------------|--------------------------------|---------------------|---------------------------------|--------------------|------------------|
| hsa-miR-183-5p    | 2.8                | 1.0                 | 22.7                          | 8.1                 | 1.1E-02              | 10.0                           | 3.6                 | 4.25E-02                        |                    | ✓                |
| hsa-miR-548d-5p   | 0.8                | 1.0                 | 2.0                           | 2.5                 | 3.3E-03              | 0.9                            | 1.1                 | 2.93E-02                        | ✓                  | ✓                |
| hsa-miR-130b-5p   | 7.1                | 1.0                 | 14.0                          | 2.0                 | 5.7E-03              | 9.0                            | 1.3                 | 2.12E-02                        |                    | ✓                |
| hsa-miR-760       | 1.1                | 1.0                 | 2.1                           | 1.9                 | 2.2E-03              | 1.0                            | -1.1                | 1.41E-02                        | ✓                  | ✓                |
| hsa-miR-363-3p    | 40.0               | 1.0                 | 72.6                          | 1.8                 | 1.5E-02              | 51.3                           | 1.3                 | 4.23E-02                        |                    | ✓                |
| hsa-miR-301a-5p   | 0.6                | 1.0                 | 1.1                           | 1.7                 | 4.1E-02              | 0.7                            | 1.1                 | 1.46E-02                        |                    | ✓                |
| hsa-miR-93-3p     | 3.2                | 1.0                 | 4.8                           | 1.5                 | 1.1E-02              | 3.4                            | 1.1                 | 2.18E-02                        | ✓                  | ✓                |
| hsa-miR-425-5p    | 45.4               | 1.0                 | 67.4                          | 1.5                 | 8.8E-03              | 49.5                           | 1.1                 | 4.03E-02                        | ✓                  | ✓                |
| hsa-miR-193b-5p   | 6.7                | 1.0                 | 4.5                           | -1.5                | 2.2E-02              | 6.1                            | -1.1                | 3.75E-02                        | ✓                  | ✓                |
| hsa-miR-23b-5p    | 1.3                | 1.0                 | 0.6                           | -2.1                | 2.1E-03              | 0.9                            | -1.4                | 4.31E-02                        |                    | ✓                |
| hsa-miR-4484      | 2.4                | 1.0                 | 0.9                           | -2.8                | 4.3E-02              | 1.8                            | -1.3                | 7.59E-03                        |                    | ✓                |
| hsa-miR-144-5p    | 10.5               | 1.0                 | 131.3                         | 12.5                | 2.5E-02              | 43.5                           | 4.1                 | 6.65E-02                        |                    |                  |
| hsa-miR-451a      | 219.2              | 1.0                 | 1982.0                        | 9.0                 | 2.4E-02              | 947.1                          | 4.3                 | 7.19E-02                        |                    |                  |
| hsa-miR-144-3p    | 13.8               | 1.0                 | 121.8                         | 8.8                 | 3.9E-02              | 44.8                           | 3.3                 | 9.31E-02                        |                    |                  |
| hsa-miR-5683      | 0.7                | 1.0                 | 3.0                           | 4.3                 | 1.3E-02              | 13.1                           | 18.5                | 3.25E-01                        |                    |                  |
| hsa-miR-184       | 1.0                | 1.0                 | 4.3                           | 4.1                 | 1.5E-02              | 2.9                            | 2.7                 | 3.60E-01                        |                    |                  |
| hsa-miR-196b-5p   | 0.2                | 1.0                 | 0.7                           | 4.0                 | 7.5E-03              | 1.0                            | 6.4                 | 2.13E-01                        |                    |                  |
| hsa-miR-129-5p    | 0.2                | 1.0                 | 0.7                           | 4.0                 | 1.7E-02              | 0.7                            | 4.0                 | 3.80E-01                        |                    |                  |
| hsa-miR-216b      | 0.1                | 1.0                 | 0.4                           | 3.6                 | 9.8E-03              | 0.3                            | 2.1                 | 1.14E-01                        |                    |                  |
| hsa-miR-34c-5p    | 1.3                | 1.0                 | 4.2                           | 3.3                 | 4.4E-03              | 7.4                            | 5.9                 | 2.90E-01                        |                    |                  |
| hsa-miR-34c-3p    | 0.1                | 1.0                 | 0.3                           | 3.2                 | 4.5E-02              | 0.3                            | 3.0                 | 2.95E-01                        |                    |                  |
| hsa-miR-3688-3p   | 0.3                | 1.0                 | 0.7                           | 2.8                 | 1.3E-02              | 0.5                            | 2.2                 | 1.59E-01                        |                    |                  |
| hsa-miR-548h-3p   | 0.6                | 1.0                 | 1.5                           | 2.7                 | 7.3E-03              | 0.9                            | 1.5                 | 3.31E-01                        |                    |                  |
| hsa-miR-3938      | 0.1                | 1.0                 | 0.3                           | 2.7                 | 4.4E-02              | 0.2                            | 1.8                 | 8.42E-02                        |                    |                  |
| hsa-miR-4792      | 16.2               | 1.0                 | 43.3                          | 2.7                 | 7.0E-03              | 46.2                           | 2.8                 | 1.93E-01                        |                    |                  |
| hsa-miR-2114-5p   | 0.2                | 1.0                 | 0.4                           | 2.6                 | 3.9E-03              | 0.1                            | -1.1                | 4.86E-03                        |                    |                  |
| hsa-miR-3914      | 0.1                | 1.0                 | 0.3                           | 2.5                 | 4.1E-02              | 0.3                            | 2.2                 | 8.83E-01                        |                    |                  |
| hsa-miR-190b      | 1.2                | 1.0                 | 2.8                           | 2.4                 | 2.2E-02              | 3.2                            | 2.8                 | 4.40E-01                        |                    |                  |
| hsa-miR-3162-3p   | 5.9                | 1.0                 | 14.2                          | 2.4                 | 9.0E-03              | 13.4                           | 2.3                 | 5.85E-01                        |                    |                  |
| hsa-miR-4661-5p   | 0.3                | 1.0                 | 0.7                           | 2.4                 | 2.2E-02              | 0.6                            | 1.9                 | 4.26E-01                        |                    |                  |
| hsa-miR-301b      | 11.0               | 1.0                 | 26.2                          | 2.4                 | 5.6E-05              | 18.3                           | 1.7                 | 1.26E-01                        |                    |                  |
| hsa-miR-141-3p    | 2.3                | 1.0                 | 5.3                           | 2.3                 | 1.3E-02              | 8.0                            | 3.5                 | 2.43E-01                        |                    |                  |
| hsa-miR-548i      | 0.3                | 1.0                 | 0.6                           | 2.3                 | 1.2E-02              | 0.5                            | 1.8                 | 5.93E-01                        |                    |                  |
| hsa-miR-548ah-5p  | 0.1                | 1.0                 | 0.2                           | 2.3                 | 2.4E-02              | 0.2                            | 1.6                 | 7.17E-01                        |                    |                  |
| hsa-miR-3622a-3p  | 0.1                | 1.0                 | 0.2                           | 2.3                 | 2.1E-02              | 0.3                            | 2.5                 | 6.83E-01                        |                    |                  |
| hsa-miR-942       | 0.3                | 1.0                 | 0.6                           | 2.2                 | 4.9E-02              | 0.7                            | 2.4                 | 6.13E-01                        |                    |                  |
| hsa-miR-3157-5p   | 2.3                | 1.0                 | 5.0                           | 2.2                 | 4.8E-02              | 4.8                            | 2.1                 | 1.58E-01                        |                    |                  |
| hsa-miR-542-3p    | 27.8               | 1.0                 | 60.3                          | 2.2                 | 1.3E-02              | 34.1                           | 1.2                 | 5.40E-02                        |                    |                  |
| hsa-miR-708-5p    | 5.7                | 1.0                 | 11.9                          | 2.1                 | 4.9E-04              | 14.2                           | 2.5                 | 3.00E-01                        |                    |                  |
| hsa-miR-125b-1-3p | 45.0               | 1.0                 | 93.6                          | 2.1                 | 1.9E-04              | 90.7                           | 2.0                 | 4.49E-01                        |                    |                  |
| hsa-miR-16-2-3p   | 0.9                | 1.0                 | 1.7                           | 2.0                 | 4.4E-02              | 1.4                            | 1.6                 | 2.62E-01                        |                    |                  |
| hsa-miR-493-3p    | 5.1                | 1.0                 | 10.4                          | 2.0                 | 5.4E-03              | 10.6                           | 2.1                 | 4.40E-01                        |                    |                  |
| hsa-miR-155-5p    | 28.0               | 1.0                 | 56.0                          | 2.0                 | 2.7E-02              | 61.7                           | 2.2                 | 1.75E-01                        |                    |                  |
| hsa-miR-4697-3p   | 0.7                | 1.0                 | 1.4                           | 2.0                 | 4.8E-02              | 1.0                            | 1.4                 | 2.63E-01                        |                    |                  |
| hsa-miR-5701      | 2.8                | 1.0                 | 5.7                           | 2.0                 | 3.4E-02              | 5.7                            | 2.0                 | 4.12E-01                        |                    |                  |
| hsa-miR-935       | 0.4                | 1.0                 | 0.9                           | 2.0                 | 3.2E-02              | 0.8                            | 1.8                 | 4.91E-01                        |                    |                  |
| hsa-miR-320b      | 1.1                | 1.0                 | 2.2                           | 1.9                 | 5.3E-03              | 1.9                            | 1.7                 | 8.15E-01                        |                    |                  |
| hsa-miR-130b-3p   | 27.8               | 1.0                 | 53.3                          | 1.9                 | 3.0E-05              | 43.3                           | 1.6                 | 6.22E-03                        |                    |                  |
| hsa-miR-1261      | 0.3                | 1.0                 | 0.7                           | 1.9                 | 2.8E-02              | 0.4                            | 1.2                 | 4.19E-01                        |                    |                  |
| hsa-miR-195-3p    | 15.8               | 1.0                 | 29.8                          | 1.9                 | 2.5E-05              | 30.1                           | 1.9                 | 9.44E-01                        |                    |                  |
| hsa-miR-605       | 0.2                | 1.0                 | 0.3                           | 1.8                 | 3.2E-02              | 0.3                            | 1.8                 | 5.60E-01                        |                    |                  |
| hsa-miR-339-5p    | 5.5                | 1.0                 | 9.8                           | 1.8                 | 3.4E-02              | 8.7                            | 1.6                 | 2.40E-01                        |                    |                  |
| hsa-miR-548n      | 0.6                | 1.0                 | 1.1                           | 1.8                 | 4.9E-02              | 0.7                            | 1.2                 | 3.80E-01                        |                    |                  |
| hsa-miR-15b-3p    | 3.9                | 1.0                 | 6.8                           | 1.7                 | 3.4E-02              | 4.6                            | 1.2                 | 5.40E-02                        |                    |                  |
| hsa-miR-4775      | 1.3                | 1.0                 | 2.3                           | 1.7                 | 2.1E-03              | 1.8                            | 1.4                 | 5.21E-02                        |                    |                  |
| hsa-miR-21-5p     | 4320.7             | 1.0                 | 7463.4                        | 1.7                 | 2.2E-02              | 8880.6                         | 2.1                 | 2.01E-01                        |                    |                  |
| hsa-miR-106b-3p   | 16.6               | 1.0                 | 28.4                          | 1.7                 | 1.2E-02              | 24.3                           | 1.5                 | 1.22E-01                        |                    |                  |
| hsa-miR-708-3p    | 7.0                | 1.0                 | 11.9                          | 1.7                 | 3.5E-02              | 13.2                           | 1.9                 | 5.17E-01                        |                    |                  |
| hsa-miR-20b-5p    | 5.2                | 1.0                 | 8.7                           | 1.7                 | 2.2E-02              | 6.0                            | 1.1                 | 5.60E-02                        |                    |                  |
| hsa-miR-106b-5p   | 28.0               | 1.0                 | 46.0                          | 1.6                 | 5.8E-03              | 42.1                           | 1.5                 | 1.55E-01                        |                    |                  |
| hsa-miR-214-5p    | 24.3               | 1.0                 | 39.8                          | 1.6                 | 1.4E-02              | 45.7                           | 1.9                 | 8.72E-01                        |                    |                  |
| hsa-miR-330-5p    | 7.3                | 1.0                 | 11.9                          | 1.6                 | 2.0E-04              | 10.2                           | 1.4                 | 2.81E-03                        |                    |                  |
| hsa-miR-199b-5p   | 571.3              | 1.0                 | 935.1                         | 1.6                 | 2.0E-02              | 1038.3                         | 1.8                 | 2.75E-01                        |                    |                  |
| hsa-miR-195-5p    | 480.2              | 1.0                 | 760.8                         | 1.6                 | 1.2E-03              | 847.3                          | 1.8                 | 5.51E-01                        |                    |                  |
| hsa-miR-199a-3p   | 2488.3             | 1.0                 | 3930.0                        | 1.6                 | 7.9E-03              | 4486.1                         | 1.8                 | 6.70E-01                        |                    |                  |
| hsa-miR-550a-3p   | 3.0                | 1.0                 | 4.7                           | 1.6                 | 4.9E-02              | 3.8                            | 1.3                 | 5.42E-01                        |                    |                  |
| hsa-miR-769-5p    | 129.6              | 1.0                 | 203.2                         | 1.6                 | 4.5E-04              | 175.5                          | 1.4                 | 3.03E-02                        |                    |                  |
| hsa-miR-301a-3p   | 233.7              | 1.0                 | 359.1                         | 1.5                 | 1.0E-02              | 283.4                          | 1.2                 | 1.58E-01                        |                    |                  |
| hsa-miR-342-5p    | 1.6                | 1.0                 | 2.5                           | 1.5                 | 3.2E-02              | 2.4                            | 1.5                 | 2.26E-01                        |                    |                  |
| hsa-miR-210       | 65.9               | 1.0                 | 99.9                          | 1.5                 | 3.2E-03              | 70.2                           | 1.1                 | 1.39E-01                        |                    |                  |
| hsa-miR-497-5p    | 192.0              | 1.0                 | 287.3                         | 1.5                 | 1.8E-02              | 278.3                          | 1.4                 | 6.23E-01                        |                    |                  |
| hsa-miR-454-5p    | 2.9                | 1.0                 | 4.4                           | 1.5                 | 1.3E-02              | 3.3                            | 1.1                 | 2.94E-02                        |                    |                  |
| hsa-miR-92b-3p    | 841.0              | 1.0                 | 1237.3                        | 1.5                 | 4.3E-03              | 972.4                          | 1.2                 | 9.53E-02                        |                    |                  |
| hsa-miR-887       | 36.0               | 1.0                 | 52.6                          | 1.5                 | 7.7E-04              | 44.3                           | 1.2                 | 3.21E-01                        |                    |                  |
| hsa-miR-181a-2-3p | 237.5              | 1.0                 | 343.4                         | 1.4                 | 3.6E-03              | 317.6                          | 1.3                 | 7.29E-01                        |                    |                  |
| hsa-miR-3158-3p   | 4.0                | 1.0                 | 5.7                           | 1.4                 | 2.7E-02              | 5.3                            | 1.3                 | 6.95E-01                        |                    |                  |
| hsa-miR-3116      | 2.8                | 1.0                 | 4.0                           | 1.4                 | 3.3E-02              | 3.9                            | 1.4                 | 4.39E-01                        |                    |                  |
| hsa-miR-625-5p    | 1.8                | 1.0                 | 2.6                           | 1.4                 | 2.0E-02              | 3.0                            | 1.6                 | 4.85E-01                        |                    |                  |
| hsa-let-7g-3p     | 4.8                | 1.0                 | 6.8                           | 1.4                 | 2.5E-03              | 8.1                            | 1.7                 | 7.84E-01                        |                    |                  |
| hsa-miR-181b-5p   | 509.2              | 1.0                 | 711.8                         | 1.4                 | 2.5E-03              | 625.5                          | 1.2                 | 7.31E-02                        |                    |                  |
| hsa-miR-421       | 108.5              | 1.0                 | 150.6                         | 1.4                 | 2.0E-02              | 114.5                          | 1.1                 | 1.33E-01                        |                    |                  |
| hsa-miR-582-5p    | 1.6                | 1.0                 | 2.2                           | 1.4                 | 2.6E-02              | 3.1                            | 1.9                 | 3.86E-01                        |                    |                  |
| hsa-miR-324-3p    | 4.1                | 1.0                 | 5.5                           | 1.4                 | 3.3E-02              | 5.4                            | 1.3                 | 1.98E-01                        |                    |                  |
| hsa-miR-27b-5p    | 91.4               | 1.0                 | 124.2                         | 1.4                 | 2.8E-02              | 123.2                          | 1.3                 | 6.67E-01                        |                    |                  |



|                  |         |     |         |      |         |         |      |          |  |  |
|------------------|---------|-----|---------|------|---------|---------|------|----------|--|--|
| hsa-miR-16-5p    | 3300.0  | 1.0 | 4479.3  | 1.4  | 1.2E-02 | 4336.6  | 1.3  | 4.80E-01 |  |  |
| hsa-miR-4677-3p  | 6.1     | 1.0 | 8.2     | 1.4  | 2.6E-02 | 7.9     | 1.3  | 2.11E-01 |  |  |
| hsa-miR-181c-5p  | 806.9   | 1.0 | 1075.3  | 1.3  | 3.5E-03 | 1064.9  | 1.3  | 8.55E-01 |  |  |
| hsa-miR-130a-3p  | 449.5   | 1.0 | 598.9   | 1.3  | 6.9E-03 | 584.3   | 1.3  | 2.30E-01 |  |  |
| hsa-miR-4301     | 99.9    | 1.0 | 132.7   | 1.3  | 3.0E-02 | 124.7   | 1.2  | 4.21E-01 |  |  |
| hsa-miR-32-5p    | 21.6    | 1.0 | 28.6    | 1.3  | 4.4E-02 | 25.5    | 1.2  | 1.50E-01 |  |  |
| hsa-miR-320a     | 385.2   | 1.0 | 510.1   | 1.3  | 4.0E-03 | 471.2   | 1.2  | 2.27E-01 |  |  |
| hsa-let-7e-3p    | 11.4    | 1.0 | 15.1    | 1.3  | 1.9E-03 | 16.0    | 1.4  | 2.74E-01 |  |  |
| hsa-miR-2355-5p  | 8.0     | 1.0 | 10.6    | 1.3  | 2.5E-02 | 9.8     | 1.2  | 9.94E-01 |  |  |
| hsa-miR-423-3p   | 602.4   | 1.0 | 795.5   | 1.3  | 3.1E-02 | 745.9   | 1.2  | 6.92E-01 |  |  |
| hsa-miR-107      | 175.6   | 1.0 | 230.8   | 1.3  | 1.9E-03 | 179.8   | 1.0  | 2.07E-01 |  |  |
| hsa-miR-24-2-5p  | 11.5    | 1.0 | 15.1    | 1.3  | 4.2E-02 | 13.0    | 1.1  | 1.68E-01 |  |  |
| hsa-miR-27a-3p   | 2659.4  | 1.0 | 3473.8  | 1.3  | 3.2E-04 | 3052.6  | 1.1  | 1.45E-01 |  |  |
| hsa-miR-101-3p   | 3458.7  | 1.0 | 4483.0  | 1.3  | 1.2E-02 | 5179.2  | 1.5  | 6.05E-01 |  |  |
| hsa-miR-328      | 59.5    | 1.0 | 76.7    | 1.3  | 7.2E-04 | 71.9    | 1.2  | 7.32E-01 |  |  |
| hsa-miR-181d     | 80.0    | 1.0 | 102.8   | 1.3  | 1.9E-02 | 98.6    | 1.2  | 5.27E-01 |  |  |
| hsa-miR-140-3p   | 909.7   | 1.0 | 1167.9  | 1.3  | 3.5E-02 | 1098.2  | 1.2  | 2.87E-01 |  |  |
| hsa-miR-103a-3p  | 1372.4  | 1.0 | 1729.5  | 1.3  | 7.3E-04 | 1446.2  | 1.1  | 1.45E-02 |  |  |
| hsa-miR-744-5p   | 26.4    | 1.0 | 33.0    | 1.3  | 4.3E-02 | 37.3    | 1.4  | 4.06E-01 |  |  |
| hsa-miR-181a-5p  | 16819.9 | 1.0 | 21002.3 | 1.2  | 2.2E-02 | 19874.6 | 1.2  | 1.85E-01 |  |  |
| hsa-miR-423-5p   | 200.7   | 1.0 | 247.9   | 1.2  | 1.5E-02 | 239.8   | 1.2  | 6.08E-01 |  |  |
| hsa-miR-23a-3p   | 1178.5  | 1.0 | 1447.1  | 1.2  | 1.5E-02 | 1359.7  | 1.2  | 1.68E-01 |  |  |
| hsa-miR-28-5p    | 460.0   | 1.0 | 560.3   | 1.2  | 1.3E-02 | 546.6   | 1.2  | 5.41E-01 |  |  |
| hsa-miR-3909     | 13.4    | 1.0 | 16.1    | 1.2  | 4.2E-02 | 13.0    | -1.0 | 2.41E-01 |  |  |
| hsa-miR-628-5p   | 27.2    | 1.0 | 32.7    | 1.2  | 8.7E-03 | 30.2    | 1.1  | 1.60E-01 |  |  |
| hsa-miR-32-3p    | 5.7     | 1.0 | 4.5     | -1.3 | 8.4E-03 | 4.1     | -1.4 | 9.92E-01 |  |  |
| hsa-miR-720      | 14.0    | 1.0 | 10.8    | -1.3 | 4.2E-02 | 10.0    | -1.4 | 4.17E-01 |  |  |
| hsa-miR-378a-3p  | 29061.7 | 1.0 | 22258.8 | -1.3 | 8.5E-03 | 23670.7 | -1.2 | 2.56E-01 |  |  |
| hsa-miR-30b-5p   | 11356.5 | 1.0 | 8603.2  | -1.3 | 2.2E-02 | 6614.4  | -1.7 | 5.69E-01 |  |  |
| hsa-miR-365a-3p  | 136.7   | 1.0 | 103.4   | -1.3 | 2.4E-02 | 117.8   | -1.2 | 5.90E-01 |  |  |
| hsa-miR-499a-5p  | 3145.3  | 1.0 | 2343.7  | -1.3 | 1.8E-02 | 2178.7  | -1.4 | 4.46E-01 |  |  |
| hsa-miR-133a     | 59310.6 | 1.0 | 42608.3 | -1.4 | 4.9E-04 | 43569.1 | -1.4 | 2.66E-01 |  |  |
| hsa-miR-17-5p    | 121.4   | 1.0 | 86.8    | -1.4 | 5.2E-03 | 83.1    | -1.5 | 9.50E-01 |  |  |
| hsa-miR-491-5p   | 3.3     | 1.0 | 2.3     | -1.4 | 7.7E-03 | 2.6     | -1.3 | 1.83E-01 |  |  |
| hsa-miR-378a-5p  | 138.1   | 1.0 | 96.6    | -1.4 | 3.1E-03 | 110.6   | -1.2 | 6.52E-01 |  |  |
| hsa-miR-29c-5p   | 102.7   | 1.0 | 67.4    | -1.5 | 9.6E-03 | 68.3    | -1.5 | 3.88E-01 |  |  |
| hsa-miR-20a-5p   | 313.3   | 1.0 | 203.8   | -1.5 | 7.2E-03 | 210.6   | -1.5 | 3.64E-01 |  |  |
| hsa-miR-1        | 9281.2  | 1.0 | 6033.1  | -1.5 | 4.9E-02 | 7590.3  | -1.2 | 5.08E-01 |  |  |
| hsa-miR-486-5p   | 49910.5 | 1.0 | 31407.2 | -1.6 | 2.5E-02 | 33878.5 | -1.5 | 2.05E-01 |  |  |
| hsa-miR-150-5p   | 276.8   | 1.0 | 173.5   | -1.6 | 4.2E-02 | 243.0   | -1.1 | 5.96E-01 |  |  |
| hsa-miR-99a-5p   | 3505.1  | 1.0 | 2195.9  | -1.6 | 3.3E-02 | 2285.2  | -1.5 | 6.19E-01 |  |  |
| hsa-miR-362-5p   | 52.4    | 1.0 | 32.7    | -1.6 | 9.4E-04 | 29.0    | -1.8 | 8.70E-01 |  |  |
| hsa-miR-378f     | 21.0    | 1.0 | 13.0    | -1.6 | 3.6E-02 | 13.1    | -1.6 | 7.24E-01 |  |  |
| hsa-miR-1301     | 28.7    | 1.0 | 17.3    | -1.7 | 4.6E-02 | 14.2    | -2.0 | 8.57E-01 |  |  |
| hsa-miR-490-5p   | 14.2    | 1.0 | 8.3     | -1.7 | 6.3E-03 | 9.9     | -1.4 | 2.00E-01 |  |  |
| hsa-miR-338-5p   | 8.1     | 1.0 | 4.7     | -1.7 | 4.9E-02 | 6.1     | -1.3 | 1.75E-01 |  |  |
| hsa-miR-1257     | 1.5     | 1.0 | 0.9     | -1.7 | 3.0E-02 | 1.3     | -1.2 | 9.73E-01 |  |  |
| hsa-miR-483-5p   | 14.6    | 1.0 | 8.3     | -1.8 | 2.0E-03 | 10.1    | -1.4 | 9.73E-02 |  |  |
| hsa-miR-1303     | 3.4     | 1.0 | 1.9     | -1.8 | 4.5E-02 | 2.8     | -1.2 | 1.10E-01 |  |  |
| hsa-miR-1273c    | 0.2     | 1.0 | 0.1     | -1.8 | 2.7E-02 | 0.1     | -1.5 | 2.91E-01 |  |  |
| hsa-miR-221-3p   | 2148.9  | 1.0 | 1149.6  | -1.9 | 7.7E-04 | 909.4   | -2.4 | 4.52E-01 |  |  |
| hsa-miR-4451     | 0.2     | 1.0 | 0.1     | -1.9 | 2.1E-02 | 0.1     | -1.4 | 4.12E-01 |  |  |
| hsa-miR-9-5p     | 59.8    | 1.0 | 31.1    | -1.9 | 1.7E-04 | 41.2    | -1.5 | 1.11E-01 |  |  |
| hsa-miR-222-3p   | 1074.1  | 1.0 | 552.7   | -1.9 | 1.4E-03 | 483.8   | -2.2 | 8.05E-01 |  |  |
| hsa-miR-3919     | 0.2     | 1.0 | 0.1     | -2.0 | 2.9E-02 | 0.1     | -2.0 | N/A      |  |  |
| hsa-miR-4786-5p  | 0.9     | 1.0 | 0.4     | -2.2 | 2.0E-02 | 0.7     | -1.2 | 9.96E-02 |  |  |
| hsa-miR-1247-3p  | 0.3     | 1.0 | 0.1     | -2.2 | 4.0E-02 | 0.7     | 2.5  | 5.08E-01 |  |  |
| hsa-miR-2964a-5p | 0.2     | 1.0 | 0.1     | -2.3 | 2.5E-02 | 0.2     | -1.5 | 1.51E-01 |  |  |
| hsa-miR-675-5p   | 6.0     | 1.0 | 2.6     | -2.3 | 1.6E-03 | 3.1     | -1.9 | 1.26E-01 |  |  |
| hsa-miR-222-5p   | 0.8     | 1.0 | 0.3     | -2.3 | 2.5E-02 | 0.3     | -2.4 | 5.55E-01 |  |  |
| hsa-miR-548v     | 0.4     | 1.0 | 0.1     | -2.7 | 8.2E-03 | 0.3     | -1.3 | 7.28E-02 |  |  |
| hsa-miR-221-5p   | 153.6   | 1.0 | 50.0    | -3.1 | 4.0E-03 | 43.2    | -3.6 | 6.57E-01 |  |  |
| hsa-miR-3679-5p  | 0.5     | 1.0 | 0.2     | -3.1 | 4.5E-02 | 0.2     | -2.8 | 4.18E-01 |  |  |

**Supplemental Table S9. Number of miRNA, mRNA and lncRNA that are differentially expressed in ICM/NICM, and the percentage of each RNA species improved, normalized or overcorrected by LVAD support**

|                                       | miRNA    |           | mRNA       |           | lncRNA    |           | P value* |         |
|---------------------------------------|----------|-----------|------------|-----------|-----------|-----------|----------|---------|
|                                       | ICM      | NICM      | ICM        | NICM      | ICM       | NICM      | ICM      | NICM    |
| Total number differentially expressed | 160      | 147       | 2262       | 1929      | 679       | 570       |          |         |
| Improved with LVAD support            | 7 (4.4%) | 11 (7.5%) | 115 (5.1%) | 83 (4.3%) | 55 (8.1%) | 56 (9.8%) | 0.0092   | <0.0001 |
| Normalized with LVAD support          | 2 (1.3%) | 5 (3.4%)  | 68 (3.0%)  | 45 (2.3%) | 26 (3.8%) | 30 (5.3%) | 0.2128   | 0.0015  |
| Overcorrected with LVAD support       | 1 (0.6%) | 1 (0.7%)  | 27 (1.2%)  | 27 (1.4%) | 8 (1.2%)  | 19 (3.3%) |          |         |

\*Chi-square test

**Supplemental Table S10. miRNAs abnormally expressed with heart failure but normalized\* with LVAD support**

| miRNA           | NF<br>(PMMR+0.1) | ICM pre-LVAD |                | ICM post-LVAD |                             |
|-----------------|------------------|--------------|----------------|---------------|-----------------------------|
|                 |                  | Fold Change  | <i>P</i> Value | Fold Change   | <i>P</i> Value <sup>†</sup> |
| hsa-miR-365a-3p | 136.7            | -1.4         | 5.6E-03        | -1.1          | 7.25E-04                    |
| hsa-miR-378a-3p | 29061.7          | -1.5         | 6.1E-04        | -1.1          | 2.78E-02                    |

  

| miRNA           | NF<br>(PMMR+0.1) | NICM pre-LVAD |                | NICM post-LVAD |                             |
|-----------------|------------------|---------------|----------------|----------------|-----------------------------|
|                 |                  | Fold Change   | <i>P</i> Value | Fold Change    | <i>P</i> Value <sup>†</sup> |
| hsa-miR-548d-5p | 0.8              | 2.5           | 3.3E-03        | 1.1            | 2.93E-02                    |
| hsa-miR-760     | 1.1              | 1.9           | 2.2E-03        | -1.1           | 1.41E-02                    |
| hsa-miR-425-5p  | 45.4             | 1.5           | 8.8E-03        | 1.1            | 4.03E-02                    |
| hsa-miR-93-3p   | 3.2              | 1.5           | 1.1E-02        | 1.1            | 2.18E-02                    |
| hsa-miR-193b-5p | 6.7              | -1.5          | 2.2E-02        | -1.1           | 3.75E-02                    |

\*Abnormal expression: > 1.2 fold change comparing to NF mean; normalization: normalized expression level to < 1.1 fold different from NF mean.

†Paired sample Wilcoxon signed rank test between ICM/NICM samples before and after LVAD support.

**Table S11. Mean normalized read counts, fold change (compared to NF hearts mean value) and P values of mRNAs that are differentially expressed in ICM LV samples**

| Gene Symbol  | NF mean (RPKM+0.1) | Fold Change (vs NF) | ICM pre-LVAD mean (RPKM+0.1) | Fold Change (vs NF) | P value (NF vs ICM) | ICM post-LVAD mean (RPKM+0.1) | Fold Change (vs NF) | P value (ICM pre vs post LVAD) | Normalized by LVAD | Improved by LVAD |
|--------------|--------------------|---------------------|------------------------------|---------------------|---------------------|-------------------------------|---------------------|--------------------------------|--------------------|------------------|
| NPPB         | 17.2               | 1.0                 | 619.5                        | 36.1                | 3.75E-02            | 175.6                         | 10.2                | 1.89E-01                       |                    |                  |
| HBA1         | 2.0                | 1.0                 | 61.6                         | 30.2                | 4.75E-04            | 54.5                          | 26.7                | 7.59E-01                       |                    |                  |
| HBB          | 3.5                | 1.0                 | 101.4                        | 29.3                | 5.42E-05            | 105.3                         | 30.4                | 9.26E-01                       |                    |                  |
| HBA2         | 2.6                | 1.0                 | 59.6                         | 23.0                | 7.03E-04            | 57.3                          | 22.1                | 9.38E-01                       |                    |                  |
| SFRP4        | 0.5                | 1.0                 | 10.5                         | 22.8                | 3.47E-02            | 7.8                           | 17.1                | 6.40E-01                       |                    |                  |
| PENK         | 0.3                | 1.0                 | 7.2                          | 22.5                | 2.09E-02            | 5.8                           | 18.1                | 6.32E-01                       |                    |                  |
| NPPA         | 99.5               | 1.0                 | 1436.0                       | 14.4                | 4.87E-02            | 363.7                         | 3.7                 | 1.70E-01                       |                    |                  |
| FMOD         | 3.4                | 1.0                 | 40.7                         | 11.9                | 1.55E-02            | 24.3                          | 7.1                 | 3.52E-01                       |                    |                  |
| UCHL1        | 2.1                | 1.0                 | 17.2                         | 8.2                 | 3.08E-03            | 13.5                          | 6.5                 | 4.78E-01                       |                    |                  |
| THRSF        | 0.1                | 1.0                 | 1.0                          | 7.3                 | 3.20E-03            | 0.3                           | 1.9                 | 1.52E-02                       |                    | √                |
| CIDEA        | 0.4                | 1.0                 | 3.2                          | 7.2                 | 5.14E-03            | 0.9                           | 2.0                 | 2.53E-02                       |                    | √                |
| ITGBL1       | 1.0                | 1.0                 | 7.4                          | 7.2                 | 1.92E-02            | 3.7                           | 3.5                 | 2.08E-01                       |                    |                  |
| THY1         | 0.6                | 1.0                 | 4.5                          | 7.1                 | 6.11E-03            | 3.4                           | 5.4                 | 4.90E-01                       |                    |                  |
| MXRA5        | 0.7                | 1.0                 | 4.8                          | 7.0                 | 4.14E-04            | 6.5                           | 9.5                 | 4.93E-01                       |                    |                  |
| PRG4         | 0.4                | 1.0                 | 2.7                          | 6.9                 | 3.59E-02            | 1.2                           | 3.0                 | 2.21E-01                       |                    |                  |
| WNT9A        | 0.8                | 1.0                 | 5.1                          | 6.6                 | 1.90E-05            | 4.7                           | 6.1                 | 7.02E-01                       |                    |                  |
| ADIPOQ       | 0.2                | 1.0                 | 1.4                          | 6.4                 | 1.76E-03            | 0.3                           | 1.2                 | 4.94E-03                       |                    | √                |
| CTGF         | 9.1                | 1.0                 | 56.5                         | 6.2                 | 8.81E-03            | 76.4                          | 8.4                 | 5.59E-01                       |                    |                  |
| RGS4         | 0.4                | 1.0                 | 2.2                          | 6.2                 | 2.52E-04            | 0.8                           | 2.2                 | 3.76E-03                       |                    | √                |
| LUM          | 24.8               | 1.0                 | 153.6                        | 6.2                 | 5.19E-03            | 144.3                         | 5.8                 | 8.75E-01                       |                    |                  |
| FAP          | 0.5                | 1.0                 | 3.2                          | 6.1                 | 1.20E-03            | 2.7                           | 5.1                 | 6.12E-01                       |                    |                  |
| TMEM119      | 0.2                | 1.0                 | 1.3                          | 5.8                 | 2.07E-02            | 0.8                           | 3.6                 | 3.15E-01                       |                    |                  |
| SERPINE2     | 4.4                | 1.0                 | 24.8                         | 5.7                 | 1.56E-03            | 20.1                          | 4.6                 | 5.98E-01                       |                    |                  |
| COL14A1      | 1.9                | 1.0                 | 10.8                         | 5.6                 | 1.74E-02            | 8.8                           | 4.5                 | 6.64E-01                       |                    |                  |
| CCDC80       | 8.9                | 1.0                 | 48.8                         | 5.5                 | 1.62E-02            | 46.2                          | 5.2                 | 9.01E-01                       |                    |                  |
| LTBP2        | 6.1                | 1.0                 | 32.7                         | 5.3                 | 2.53E-03            | 20.3                          | 3.3                 | 2.28E-01                       |                    |                  |
| HAPLN1       | 0.2                | 1.0                 | 1.3                          | 5.2                 | 1.34E-03            | 1.0                           | 4.2                 | 6.58E-01                       |                    |                  |
| ASPEN        | 4.9                | 1.0                 | 25.5                         | 5.2                 | 5.33E-04            | 25.5                          | 5.2                 | 9.95E-01                       |                    |                  |
| PLIN1        | 0.4                | 1.0                 | 2.0                          | 5.2                 | 6.47E-03            | 0.5                           | 1.3                 | 3.20E-02                       |                    | √                |
| RBP4         | 0.5                | 1.0                 | 2.4                          | 5.1                 | 3.89E-03            | 0.5                           | -1.0                | 1.15E-02                       | √                  | √                |
| GAP43        | 0.2                | 1.0                 | 1.2                          | 4.9                 | 3.06E-02            | 1.0                           | 4.4                 | 8.45E-01                       |                    |                  |
| POSTN        | 7.7                | 1.0                 | 36.8                         | 4.8                 | 3.33E-03            | 37.1                          | 4.8                 | 9.88E-01                       |                    |                  |
| FRZB         | 1.3                | 1.0                 | 6.4                          | 4.8                 | 3.22E-02            | 5.8                           | 4.4                 | 8.53E-01                       |                    |                  |
| EGR2         | 0.5                | 1.0                 | 2.2                          | 4.7                 | 2.43E-03            | 4.5                           | 9.6                 | 2.97E-01                       |                    |                  |
| CA3          | 2.0                | 1.0                 | 9.2                          | 4.6                 | 1.71E-02            | 4.7                           | 2.3                 | 8.20E-02                       |                    |                  |
| OGDHL        | 0.5                | 1.0                 | 2.4                          | 4.5                 | 1.81E-02            | 2.1                           | 3.9                 | 5.61E-01                       |                    |                  |
| PRELP        | 11.7               | 1.0                 | 51.6                         | 4.4                 | 2.11E-02            | 23.3                          | 2.0                 | 1.53E-01                       |                    |                  |
| SCUBE2       | 0.4                | 1.0                 | 1.7                          | 4.3                 | 2.61E-02            | 1.7                           | 4.3                 | 9.52E-01                       |                    |                  |
| COL1A1       | 9.4                | 1.0                 | 40.5                         | 4.3                 | 1.83E-02            | 30.0                          | 3.2                 | 5.39E-01                       |                    |                  |
| PLVAP        | 5.0                | 1.0                 | 21.2                         | 4.3                 | 3.38E-02            | 12.6                          | 2.5                 | 2.96E-01                       |                    |                  |
| SSCS5D       | 0.7                | 1.0                 | 3.0                          | 4.1                 | 1.76E-02            | 2.5                           | 3.4                 | 6.43E-01                       |                    |                  |
| CIDEA        | 0.3                | 1.0                 | 1.1                          | 4.0                 | 8.63E-04            | 0.6                           | 2.1                 | 9.28E-02                       |                    |                  |
| C21orf7      | 0.6                | 1.0                 | 2.5                          | 4.0                 | 2.28E-02            | 3.1                           | 5.1                 | 6.23E-01                       |                    |                  |
| CTHRC1       | 0.5                | 1.0                 | 2.2                          | 4.0                 | 2.91E-02            | 1.7                           | 3.1                 | 5.56E-01                       |                    |                  |
| EGR3         | 0.4                | 1.0                 | 1.7                          | 3.9                 | 1.07E-03            | 1.9                           | 4.3                 | 7.89E-01                       |                    |                  |
| C16orf89     | 1.0                | 1.0                 | 3.8                          | 3.8                 | 2.06E-02            | 2.8                           | 2.8                 | 4.40E-01                       |                    |                  |
| COL1A2       | 20.3               | 1.0                 | 77.4                         | 3.8                 | 1.51E-02            | 56.7                          | 2.8                 | 4.80E-01                       |                    |                  |
| BGN          | 24.8               | 1.0                 | 93.7                         | 3.8                 | 3.72E-02            | 77.8                          | 3.1                 | 7.05E-01                       |                    |                  |
| PCK1         | 0.1                | 1.0                 | 0.5                          | 3.8                 | 2.69E-02            | 0.2                           | 1.3                 | 4.17E-02                       |                    | √                |
| TUSC5        | 0.3                | 1.0                 | 0.9                          | 3.6                 | 8.96E-03            | 0.3                           | 1.1                 | 2.11E-02                       | √                  | √                |
| MDK          | 1.7                | 1.0                 | 6.1                          | 3.6                 | 8.11E-03            | 6.6                           | 3.9                 | 7.70E-01                       |                    |                  |
| CFH          | 10.8               | 1.0                 | 38.6                         | 3.6                 | 4.34E-02            | 19.6                          | 1.8                 | 2.37E-01                       |                    |                  |
| PI16         | 5.4                | 1.0                 | 19.2                         | 3.6                 | 1.19E-02            | 17.8                          | 3.3                 | 8.46E-01                       |                    |                  |
| DPT          | 15.0               | 1.0                 | 53.4                         | 3.6                 | 3.74E-03            | 51.7                          | 3.4                 | 9.08E-01                       |                    |                  |
| ISLR         | 4.3                | 1.0                 | 15.1                         | 3.5                 | 3.59E-02            | 9.3                           | 2.2                 | 3.09E-01                       |                    |                  |
| COL3A1       | 21.4               | 1.0                 | 75.2                         | 3.5                 | 1.48E-02            | 57.5                          | 2.7                 | 5.04E-01                       |                    |                  |
| THBS4        | 27.1               | 1.0                 | 93.3                         | 3.4                 | 2.91E-02            | 115.2                         | 4.2                 | 5.41E-01                       |                    |                  |
| PDE8B        | 0.6                | 1.0                 | 2.2                          | 3.4                 | 1.92E-02            | 1.1                           | 1.7                 | 8.17E-02                       |                    |                  |
| CTSK         | 3.3                | 1.0                 | 11.3                         | 3.4                 | 3.60E-02            | 7.4                           | 2.2                 | 3.86E-01                       |                    |                  |
| OMD          | 2.9                | 1.0                 | 9.9                          | 3.4                 | 1.75E-02            | 6.3                           | 2.2                 | 3.09E-01                       |                    |                  |
| SLC30A2      | 1.1                | 1.0                 | 3.7                          | 3.4                 | 1.29E-02            | 1.9                           | 1.8                 | 5.01E-02                       |                    |                  |
| TNFRSF11B    | 1.6                | 1.0                 | 5.6                          | 3.4                 | 3.35E-03            | 4.9                           | 3.0                 | 7.99E-01                       |                    |                  |
| CP           | 0.6                | 1.0                 | 1.9                          | 3.3                 | 6.63E-03            | 1.1                           | 1.9                 | 7.92E-02                       |                    |                  |
| HAPLN3       | 0.7                | 1.0                 | 2.3                          | 3.3                 | 1.61E-03            | 1.6                           | 2.3                 | 1.32E-01                       |                    |                  |
| NT5E         | 0.9                | 1.0                 | 2.9                          | 3.2                 | 1.29E-02            | 1.7                           | 1.9                 | 1.50E-01                       |                    |                  |
| STAT4        | 1.0                | 1.0                 | 3.2                          | 3.2                 | 1.35E-02            | 3.8                           | 3.9                 | 6.73E-01                       |                    |                  |
| CERCAM       | 2.5                | 1.0                 | 7.9                          | 3.2                 | 2.83E-02            | 5.7                           | 2.3                 | 4.53E-01                       |                    |                  |
| MGP          | 75.6               | 1.0                 | 243.7                        | 3.2                 | 1.86E-02            | 202.4                         | 2.7                 | 6.20E-01                       |                    |                  |
| LOC100129480 | 0.3                | 1.0                 | 1.0                          | 3.2                 | 5.18E-04            | 2.1                           | 6.9                 | 1.02E-01                       |                    |                  |
| TF           | 0.3                | 1.0                 | 1.1                          | 3.1                 | 3.05E-02            | 0.6                           | 1.8                 | 1.96E-01                       |                    |                  |
| IRX6         | 3.1                | 1.0                 | 9.7                          | 3.1                 | 1.10E-03            | 6.5                           | 2.1                 | 3.81E-02                       |                    | √                |
| OLFML2B      | 0.7                | 1.0                 | 2.2                          | 3.1                 | 3.55E-02            | 1.2                           | 1.7                 | 2.12E-01                       |                    |                  |
| APLP1        | 2.1                | 1.0                 | 6.6                          | 3.1                 | 1.14E-05            | 4.2                           | 2.0                 | 7.63E-04                       |                    | √                |
| INHBB        | 0.8                | 1.0                 | 2.6                          | 3.1                 | 2.56E-02            | 2.3                           | 2.7                 | 6.97E-01                       |                    |                  |
| SMOC2        | 8.4                | 1.0                 | 26.1                         | 3.1                 | 8.66E-03            | 26.2                          | 3.1                 | 9.91E-01                       |                    |                  |
| COL16A1      | 2.8                | 1.0                 | 8.6                          | 3.1                 | 1.13E-02            | 6.9                           | 2.5                 | 4.80E-01                       |                    |                  |
| LOXL1        | 4.4                | 1.0                 | 13.7                         | 3.1                 | 6.13E-03            | 10.2                          | 2.3                 | 4.32E-01                       |                    |                  |
| MXRA8        | 6.5                | 1.0                 | 19.7                         | 3.0                 | 2.69E-02            | 14.0                          | 2.1                 | 4.02E-01                       |                    |                  |
| SYTL2        | 1.3                | 1.0                 | 3.8                          | 3.0                 | 1.51E-02            | 2.9                           | 2.3                 | 4.41E-01                       |                    |                  |

|            |       |     |       |     |          |       |      |          |  |   |
|------------|-------|-----|-------|-----|----------|-------|------|----------|--|---|
| BOC        | 1.3   | 1.0 | 3.9   | 3.0 | 8.71E-03 | 3.3   | 2.6  | 5.93E-01 |  |   |
| IER3       | 9.5   | 1.0 | 28.5  | 3.0 | 1.42E-04 | 16.9  | 1.8  | 1.91E-02 |  | √ |
| CILP       | 3.5   | 1.0 | 10.5  | 3.0 | 1.97E-03 | 14.5  | 4.2  | 3.91E-01 |  |   |
| SNAI1      | 0.6   | 1.0 | 1.9   | 2.9 | 1.58E-02 | 2.0   | 3.1  | 8.75E-01 |  |   |
| C14orf132  | 0.4   | 1.0 | 1.3   | 2.9 | 7.88E-04 | 1.1   | 2.5  | 6.02E-01 |  |   |
| FMO3       | 0.8   | 1.0 | 2.4   | 2.9 | 1.59E-02 | 2.0   | 2.4  | 4.98E-01 |  |   |
| COLQ       | 2.7   | 1.0 | 7.8   | 2.9 | 2.81E-02 | 6.4   | 2.4  | 6.49E-01 |  |   |
| ZMYND17    | 1.4   | 1.0 | 3.9   | 2.9 | 6.41E-03 | 2.3   | 1.7  | 2.95E-02 |  | √ |
| PCOLCE2    | 16.5  | 1.0 | 47.3  | 2.9 | 1.02E-02 | 28.5  | 1.7  | 1.58E-01 |  |   |
| SULF1      | 2.6   | 1.0 | 7.4   | 2.9 | 4.24E-02 | 4.8   | 1.9  | 3.93E-01 |  |   |
| THBS2      | 2.6   | 1.0 | 7.6   | 2.9 | 6.15E-03 | 6.2   | 2.3  | 6.38E-01 |  |   |
| CYR61      | 11.9  | 1.0 | 34.1  | 2.9 | 3.78E-02 | 63.4  | 5.3  | 2.46E-01 |  |   |
| CEBPA      | 0.4   | 1.0 | 1.0   | 2.8 | 1.17E-02 | 0.3   | -1.1 | 1.96E-02 |  |   |
| SDSL       | 1.4   | 1.0 | 4.0   | 2.8 | 6.40E-05 | 3.3   | 2.3  | 2.35E-01 |  |   |
| HIST1H2AK  | 0.7   | 1.0 | 1.9   | 2.8 | 9.48E-03 | 1.4   | 2.0  | 7.68E-02 |  |   |
| CD200      | 0.6   | 1.0 | 1.6   | 2.8 | 2.09E-02 | 1.2   | 2.0  | 2.22E-01 |  |   |
| PHLDA1     | 1.8   | 1.0 | 4.9   | 2.8 | 2.04E-02 | 6.4   | 3.6  | 4.15E-01 |  |   |
| FOXS1      | 1.1   | 1.0 | 2.9   | 2.8 | 8.36E-03 | 1.2   | 1.1  | 5.31E-02 |  |   |
| ADAMTSL2   | 1.4   | 1.0 | 3.9   | 2.8 | 3.46E-02 | 2.9   | 2.0  | 3.37E-01 |  |   |
| F2R        | 3.6   | 1.0 | 9.8   | 2.7 | 9.95E-04 | 8.3   | 2.3  | 5.88E-01 |  |   |
| CYP1B1     | 3.8   | 1.0 | 10.5  | 2.7 | 8.07E-04 | 10.4  | 2.7  | 9.69E-01 |  |   |
| DACT1      | 0.7   | 1.0 | 1.8   | 2.7 | 4.17E-02 | 1.1   | 1.6  | 2.96E-01 |  |   |
| ECM2       | 2.9   | 1.0 | 7.9   | 2.7 | 8.20E-03 | 6.7   | 2.3  | 6.17E-01 |  |   |
| PRSS23     | 2.2   | 1.0 | 6.0   | 2.7 | 2.94E-02 | 4.4   | 2.0  | 3.73E-01 |  |   |
| ENO2       | 3.6   | 1.0 | 9.5   | 2.7 | 2.14E-03 | 5.9   | 1.7  | 6.97E-02 |  |   |
| NAP1L3     | 1.1   | 1.0 | 3.0   | 2.6 | 2.28E-04 | 2.1   | 1.8  | 1.78E-02 |  | √ |
| MLLT11     | 8.7   | 1.0 | 22.8  | 2.6 | 5.88E-03 | 20.2  | 2.3  | 6.16E-01 |  |   |
| KCNS3      | 1.0   | 1.0 | 2.6   | 2.6 | 5.65E-03 | 1.5   | 1.5  | 6.48E-02 |  |   |
| BOK        | 1.1   | 1.0 | 2.9   | 2.5 | 3.45E-02 | 1.7   | 1.5  | 1.01E-01 |  |   |
| DPYSL3     | 7.2   | 1.0 | 18.1  | 2.5 | 4.79E-02 | 12.2  | 1.7  | 3.88E-01 |  |   |
| HAAO       | 1.0   | 1.0 | 2.5   | 2.5 | 4.73E-02 | 2.4   | 2.4  | 8.51E-01 |  |   |
| BMP4       | 1.8   | 1.0 | 4.6   | 2.5 | 6.10E-03 | 5.6   | 3.1  | 4.46E-01 |  |   |
| RASA4      | 2.4   | 1.0 | 5.9   | 2.5 | 8.17E-04 | 3.7   | 1.5  | 1.20E-02 |  | √ |
| SLC6A6     | 6.1   | 1.0 | 15.2  | 2.5 | 3.10E-02 | 9.2   | 1.5  | 2.01E-01 |  |   |
| FN1        | 34.4  | 1.0 | 84.9  | 2.5 | 1.51E-02 | 59.2  | 1.7  | 3.48E-01 |  |   |
| SLC7A5     | 0.6   | 1.0 | 1.4   | 2.5 | 3.06E-04 | 1.0   | 1.8  | 4.59E-02 |  | √ |
| FIBIN      | 3.9   | 1.0 | 9.6   | 2.5 | 1.20E-02 | 11.7  | 3.0  | 5.75E-01 |  |   |
| PTPRF      | 0.5   | 1.0 | 1.1   | 2.5 | 4.61E-03 | 0.7   | 1.4  | 1.12E-01 |  |   |
| COL8A1     | 3.5   | 1.0 | 8.5   | 2.5 | 1.54E-03 | 5.6   | 1.6  | 2.13E-01 |  |   |
| NCRNA00152 | 1.8   | 1.0 | 4.3   | 2.5 | 2.70E-03 | 4.1   | 2.3  | 8.77E-01 |  |   |
| IGFBP2     | 25.6  | 1.0 | 62.5  | 2.4 | 2.48E-02 | 47.5  | 1.9  | 3.19E-01 |  |   |
| LSP1       | 6.1   | 1.0 | 14.9  | 2.4 | 1.31E-02 | 12.9  | 2.1  | 6.47E-01 |  |   |
| TNC        | 1.1   | 1.0 | 2.6   | 2.4 | 3.71E-02 | 5.0   | 4.7  | 3.60E-01 |  |   |
| KCNC4      | 1.0   | 1.0 | 2.5   | 2.4 | 9.59E-06 | 2.7   | 2.6  | 7.33E-01 |  |   |
| QPCT       | 0.7   | 1.0 | 1.6   | 2.4 | 8.16E-04 | 1.4   | 2.1  | 3.44E-01 |  |   |
| GEM        | 4.3   | 1.0 | 10.3  | 2.4 | 3.65E-03 | 7.7   | 1.8  | 4.50E-01 |  |   |
| MME        | 0.6   | 1.0 | 1.5   | 2.4 | 1.39E-02 | 1.2   | 1.9  | 9.37E-02 |  |   |
| TGFB2      | 0.7   | 1.0 | 1.6   | 2.4 | 3.08E-02 | 2.2   | 3.3  | 5.06E-01 |  |   |
| CLEC11A    | 1.3   | 1.0 | 3.1   | 2.4 | 3.54E-03 | 3.1   | 2.4  | 9.82E-01 |  |   |
| DUSP6      | 5.0   | 1.0 | 11.9  | 2.4 | 1.76E-02 | 10.2  | 2.0  | 6.42E-01 |  |   |
| SVEP1      | 1.2   | 1.0 | 2.9   | 2.4 | 3.30E-03 | 2.2   | 1.8  | 3.03E-01 |  |   |
| VCAN       | 5.2   | 1.0 | 12.5  | 2.4 | 2.34E-02 | 9.4   | 1.8  | 5.20E-01 |  |   |
| SNCA       | 0.8   | 1.0 | 1.9   | 2.4 | 1.33E-03 | 1.2   | 1.5  | 5.16E-02 |  |   |
| SMAD7      | 3.2   | 1.0 | 7.4   | 2.3 | 7.56E-04 | 4.6   | 1.5  | 1.11E-01 |  |   |
| ETV5       | 1.0   | 1.0 | 2.4   | 2.3 | 4.20E-03 | 1.2   | 1.2  | 5.47E-02 |  |   |
| THBS3      | 2.2   | 1.0 | 5.2   | 2.3 | 2.52E-02 | 4.0   | 1.8  | 4.60E-01 |  |   |
| MEST       | 0.8   | 1.0 | 1.9   | 2.3 | 1.27E-02 | 1.0   | 1.2  | 2.47E-02 |  | √ |
| SNAP47     | 6.3   | 1.0 | 14.7  | 2.3 | 3.98E-07 | 12.3  | 1.9  | 2.12E-01 |  |   |
| SOD3       | 18.0  | 1.0 | 41.6  | 2.3 | 4.77E-02 | 32.5  | 1.8  | 4.63E-01 |  |   |
| EPHA3      | 1.7   | 1.0 | 3.9   | 2.3 | 6.17E-03 | 3.2   | 1.9  | 4.95E-01 |  |   |
| FKBP10     | 3.2   | 1.0 | 7.3   | 2.3 | 4.36E-02 | 5.9   | 1.9  | 5.65E-01 |  |   |
| DUSP15     | 0.9   | 1.0 | 2.1   | 2.3 | 1.03E-02 | 1.3   | 1.4  | 4.56E-02 |  | √ |
| HTRA1      | 15.3  | 1.0 | 34.9  | 2.3 | 4.16E-03 | 25.7  | 1.7  | 2.52E-01 |  |   |
| HSPB6      | 379.4 | 1.0 | 859.2 | 2.3 | 1.02E-05 | 710.8 | 1.9  | 2.81E-01 |  |   |
| RCN3       | 3.3   | 1.0 | 7.4   | 2.3 | 4.74E-02 | 6.2   | 1.9  | 6.33E-01 |  |   |
| NRP2       | 0.9   | 1.0 | 1.9   | 2.2 | 1.91E-02 | 1.2   | 1.4  | 1.48E-01 |  |   |
| C1QTNF7    | 0.6   | 1.0 | 1.4   | 2.2 | 2.53E-02 | 1.0   | 1.6  | 3.11E-01 |  |   |
| CDH11      | 2.0   | 1.0 | 4.6   | 2.2 | 4.24E-02 | 3.3   | 1.6  | 4.27E-01 |  |   |
| DUSP5      | 2.7   | 1.0 | 5.9   | 2.2 | 3.12E-03 | 10.2  | 3.8  | 2.29E-01 |  |   |
| MOXD1      | 1.1   | 1.0 | 2.5   | 2.2 | 4.30E-03 | 2.0   | 1.8  | 3.65E-01 |  |   |
| RGS11      | 3.8   | 1.0 | 8.3   | 2.2 | 1.72E-04 | 7.4   | 2.0  | 6.73E-02 |  |   |
| LEPR       | 1.4   | 1.0 | 3.0   | 2.2 | 1.27E-02 | 1.8   | 1.3  | 1.14E-01 |  |   |
| FAM107B    | 1.2   | 1.0 | 2.7   | 2.2 | 4.14E-03 | 1.9   | 1.5  | 1.69E-01 |  |   |
| FSCN1      | 2.4   | 1.0 | 5.2   | 2.2 | 1.75E-02 | 3.4   | 1.4  | 1.66E-01 |  |   |
| MN1        | 1.1   | 1.0 | 2.3   | 2.2 | 1.23E-02 | 1.3   | 1.2  | 1.02E-01 |  |   |
| KCTD17     | 1.3   | 1.0 | 2.7   | 2.2 | 1.50E-02 | 1.8   | 1.5  | 1.89E-01 |  |   |
| SPRY1      | 5.8   | 1.0 | 12.4  | 2.2 | 2.94E-03 | 15.7  | 2.7  | 3.30E-01 |  |   |
| NBLA00301  | 2.0   | 1.0 | 4.3   | 2.1 | 9.72E-06 | 3.6   | 1.8  | 1.41E-01 |  |   |
| LEPREL1    | 0.8   | 1.0 | 1.7   | 2.1 | 5.07E-03 | 1.4   | 1.7  | 1.30E-01 |  |   |
| SPHK1      | 1.0   | 1.0 | 2.1   | 2.1 | 1.51E-03 | 1.8   | 1.9  | 5.24E-01 |  |   |
| C7orf41    | 4.3   | 1.0 | 9.2   | 2.1 | 1.13E-04 | 6.9   | 1.6  | 5.97E-02 |  |   |
| KDELRL3    | 2.4   | 1.0 | 5.1   | 2.1 | 4.77E-03 | 4.1   | 1.7  | 3.01E-01 |  |   |
| ANKRD33B   | 1.0   | 1.0 | 2.1   | 2.1 | 4.93E-03 | 2.1   | 2.1  | 9.83E-01 |  |   |
| GPX8       | 0.9   | 1.0 | 2.0   | 2.1 | 6.55E-03 | 1.2   | 1.3  | 9.21E-02 |  |   |

|            |        |     |        |     |          |        |     |          |  |   |
|------------|--------|-----|--------|-----|----------|--------|-----|----------|--|---|
| TPM3       | 17.2   | 1.0 | 36.5   | 2.1 | 1.14E-02 | 31.4   | 1.8 | 5.14E-01 |  |   |
| BHLHE40    | 10.0   | 1.0 | 21.1   | 2.1 | 3.57E-02 | 21.3   | 2.1 | 9.87E-01 |  |   |
| FSTL3      | 16.2   | 1.0 | 34.0   | 2.1 | 3.25E-03 | 32.0   | 2.0 | 7.22E-01 |  |   |
| GLT25D2    | 1.8    | 1.0 | 3.8    | 2.1 | 8.27E-03 | 3.2    | 1.8 | 5.69E-01 |  |   |
| GOLM1      | 2.0    | 1.0 | 4.2    | 2.1 | 7.41E-03 | 3.3    | 1.6 | 2.85E-01 |  |   |
| ABI3BP     | 5.3    | 1.0 | 11.2   | 2.1 | 4.36E-02 | 9.9    | 1.9 | 7.59E-01 |  |   |
| PIK3IP1    | 5.6    | 1.0 | 11.8   | 2.1 | 8.89E-03 | 7.0    | 1.2 | 3.03E-02 |  | √ |
| SCN2B      | 3.3    | 1.0 | 7.0    | 2.1 | 3.78E-05 | 5.0    | 1.5 | 4.30E-03 |  | √ |
| MARVELD1   | 2.2    | 1.0 | 4.5    | 2.1 | 4.84E-02 | 2.9    | 1.3 | 2.63E-01 |  |   |
| PPP1R10    | 3.0    | 1.0 | 6.2    | 2.1 | 2.61E-05 | 4.8    | 1.6 | 1.07E-01 |  |   |
| DNM1       | 1.6    | 1.0 | 3.3    | 2.1 | 3.58E-02 | 2.3    | 1.4 | 2.93E-01 |  |   |
| MYH10      | 7.0    | 1.0 | 14.6   | 2.1 | 3.39E-02 | 9.7    | 1.4 | 2.46E-01 |  |   |
| CACNB1     | 1.1    | 1.0 | 2.3    | 2.1 | 5.91E-03 | 1.8    | 1.7 | 3.98E-01 |  |   |
| F10        | 1.9    | 1.0 | 4.0    | 2.1 | 1.03E-02 | 3.4    | 1.8 | 4.42E-01 |  |   |
| RAB31      | 3.5    | 1.0 | 7.1    | 2.1 | 2.35E-02 | 5.9    | 1.7 | 5.63E-01 |  |   |
| SERPIN1    | 2.1    | 1.0 | 4.3    | 2.1 | 3.82E-05 | 3.5    | 1.7 | 1.25E-01 |  |   |
| FZD7       | 4.1    | 1.0 | 8.4    | 2.0 | 1.10E-05 | 5.0    | 1.2 | 2.78E-03 |  | √ |
| DDAH1      | 2.5    | 1.0 | 5.1    | 2.0 | 4.75E-02 | 5.5    | 2.2 | 8.29E-01 |  |   |
| PROM1      | 0.6    | 1.0 | 1.1    | 2.0 | 6.09E-03 | 1.9    | 3.5 | 3.97E-01 |  |   |
| STAMBPL1   | 1.1    | 1.0 | 2.1    | 2.0 | 1.64E-03 | 1.3    | 1.3 | 7.26E-02 |  |   |
| PTGFRN     | 11.0   | 1.0 | 22.3   | 2.0 | 7.62E-06 | 17.4   | 1.6 | 3.27E-02 |  |   |
| CD44       | 2.7    | 1.0 | 5.4    | 2.0 | 1.80E-02 | 4.6    | 1.7 | 5.76E-01 |  |   |
| MAFK       | 16.1   | 1.0 | 32.4   | 2.0 | 1.46E-04 | 31.5   | 2.0 | 8.02E-01 |  |   |
| IRF7       | 2.1    | 1.0 | 4.2    | 2.0 | 4.81E-02 | 3.6    | 1.8 | 6.46E-01 |  |   |
| SLC9A1     | 3.5    | 1.0 | 7.1    | 2.0 | 1.55E-04 | 5.2    | 1.5 | 4.40E-02 |  | √ |
| ACE        | 1.6    | 1.0 | 3.2    | 2.0 | 3.81E-02 | 3.5    | 2.2 | 6.61E-01 |  |   |
| EXT1       | 3.5    | 1.0 | 6.9    | 2.0 | 3.36E-03 | 6.3    | 1.8 | 5.74E-01 |  |   |
| FNDC1      | 0.5    | 1.0 | 0.9    | 2.0 | 2.16E-02 | 1.8    | 3.9 | 8.31E-02 |  |   |
| CXCL16     | 1.3    | 1.0 | 2.5    | 2.0 | 4.94E-02 | 1.8    | 1.4 | 4.12E-01 |  |   |
| HSPA2      | 5.4    | 1.0 | 10.6   | 2.0 | 4.28E-02 | 12.2   | 2.3 | 6.25E-01 |  |   |
| HIST1H4H   | 1.1    | 1.0 | 2.1    | 2.0 | 1.32E-02 | 1.6    | 1.5 | 1.73E-01 |  |   |
| ARID5A     | 6.6    | 1.0 | 13.0   | 2.0 | 7.29E-03 | 16.7   | 2.5 | 1.73E-01 |  |   |
| GDPD5      | 0.8    | 1.0 | 1.5    | 2.0 | 3.02E-02 | 1.3    | 1.7 | 6.30E-01 |  |   |
| BAMBI      | 4.5    | 1.0 | 8.8    | 2.0 | 1.38E-02 | 8.8    | 1.9 | 9.70E-01 |  |   |
| GPR153     | 1.0    | 1.0 | 1.9    | 2.0 | 6.68E-03 | 1.3    | 1.3 | 1.48E-01 |  |   |
| COL4A5     | 1.2    | 1.0 | 2.4    | 2.0 | 3.79E-03 | 1.9    | 1.6 | 1.53E-01 |  |   |
| PROS1      | 17.2   | 1.0 | 33.5   | 2.0 | 3.24E-03 | 21.9   | 1.3 | 3.27E-02 |  | √ |
| PPDPF      | 76.1   | 1.0 | 148.4  | 1.9 | 5.89E-05 | 130.8  | 1.7 | 1.16E-01 |  |   |
| ARPC4-TTL3 | 1.3    | 1.0 | 2.5    | 1.9 | 2.49E-03 | 2.0    | 1.5 | 1.51E-01 |  |   |
| SOCS2      | 3.2    | 1.0 | 6.2    | 1.9 | 9.49E-04 | 8.5    | 2.6 | 9.08E-02 |  |   |
| CDR2       | 2.1    | 1.0 | 4.0    | 1.9 | 2.53E-02 | 3.2    | 1.5 | 4.08E-01 |  |   |
| XAF1       | 1.8    | 1.0 | 3.5    | 1.9 | 3.12E-02 | 2.6    | 1.5 | 3.28E-01 |  |   |
| MF12       | 1.4    | 1.0 | 2.7    | 1.9 | 2.86E-02 | 1.9    | 1.3 | 5.38E-02 |  |   |
| DIO2       | 1.8    | 1.0 | 3.5    | 1.9 | 2.22E-02 | 4.2    | 2.3 | 4.38E-01 |  |   |
| CXCR4      | 1.4    | 1.0 | 2.6    | 1.9 | 2.39E-02 | 4.2    | 3.1 | 3.08E-01 |  |   |
| CRYM       | 26.2   | 1.0 | 50.2   | 1.9 | 1.45E-02 | 42.9   | 1.6 | 2.95E-01 |  |   |
| FADS2      | 3.4    | 1.0 | 6.6    | 1.9 | 3.52E-02 | 5.5    | 1.6 | 5.32E-01 |  |   |
| DACT3      | 2.2    | 1.0 | 4.2    | 1.9 | 2.85E-02 | 3.0    | 1.4 | 2.76E-01 |  |   |
| ANKRD1     | 1116.5 | 1.0 | 2130.5 | 1.9 | 1.12E-02 | 2365.1 | 2.1 | 5.79E-01 |  |   |
| IFI27L2    | 10.8   | 1.0 | 20.6   | 1.9 | 1.11E-03 | 19.3   | 1.8 | 6.31E-01 |  |   |
| COL12A1    | 4.3    | 1.0 | 8.1    | 1.9 | 1.45E-03 | 7.3    | 1.7 | 6.72E-01 |  |   |
| HNMT       | 1.8    | 1.0 | 3.5    | 1.9 | 2.11E-02 | 2.2    | 1.2 | 1.25E-01 |  |   |
| DOK4       | 1.8    | 1.0 | 3.3    | 1.9 | 1.87E-02 | 2.3    | 1.3 | 1.36E-01 |  |   |
| LTBP3      | 16.7   | 1.0 | 31.6   | 1.9 | 1.55E-02 | 26.0   | 1.6 | 4.14E-01 |  |   |
| RAB23      | 2.7    | 1.0 | 5.2    | 1.9 | 1.05E-02 | 3.6    | 1.3 | 1.71E-01 |  |   |
| STMN3      | 2.0    | 1.0 | 3.7    | 1.9 | 4.57E-02 | 3.2    | 1.6 | 6.19E-01 |  |   |
| SLC22A17   | 2.7    | 1.0 | 5.0    | 1.9 | 1.17E-02 | 4.0    | 1.5 | 2.10E-01 |  |   |
| SLC19A3    | 0.2    | 1.0 | 0.3    | 1.9 | 7.99E-03 | 0.2    | 1.2 | 5.89E-02 |  |   |
| B3GNT9     | 2.9    | 1.0 | 5.4    | 1.9 | 6.18E-03 | 4.3    | 1.5 | 2.72E-01 |  |   |
| PER2       | 1.0    | 1.0 | 1.9    | 1.9 | 3.63E-03 | 2.5    | 2.6 | 2.81E-01 |  |   |
| COL5A1     | 3.9    | 1.0 | 7.3    | 1.9 | 3.64E-02 | 6.4    | 1.7 | 6.92E-01 |  |   |
| ATP8B2     | 2.6    | 1.0 | 4.9    | 1.9 | 6.33E-03 | 3.6    | 1.4 | 1.84E-01 |  |   |
| PLCE1      | 2.9    | 1.0 | 5.4    | 1.9 | 5.17E-04 | 5.1    | 1.8 | 7.18E-01 |  |   |
| PAK1       | 1.5    | 1.0 | 2.9    | 1.9 | 1.69E-02 | 1.9    | 1.3 | 7.70E-02 |  |   |
| PDE5A      | 1.4    | 1.0 | 2.6    | 1.9 | 3.07E-03 | 2.3    | 1.6 | 4.51E-01 |  |   |
| BMP6       | 1.1    | 1.0 | 2.0    | 1.9 | 2.17E-02 | 1.1    | 1.0 | 7.43E-02 |  |   |
| SNED1      | 1.5    | 1.0 | 2.8    | 1.9 | 2.52E-02 | 2.1    | 1.4 | 2.31E-01 |  |   |
| ENPP2      | 1.9    | 1.0 | 3.5    | 1.9 | 4.49E-02 | 2.1    | 1.1 | 9.85E-02 |  |   |
| CGNL1      | 3.7    | 1.0 | 7.0    | 1.9 | 4.36E-03 | 5.4    | 1.4 | 6.97E-02 |  |   |
| UBA7       | 3.6    | 1.0 | 6.7    | 1.9 | 1.20E-02 | 5.5    | 1.6 | 2.88E-01 |  |   |
| FKBP11     | 1.1    | 1.0 | 2.1    | 1.9 | 1.20E-02 | 1.9    | 1.7 | 6.86E-01 |  |   |
| ENAM       | 1.3    | 1.0 | 2.4    | 1.9 | 7.71E-04 | 2.1    | 1.6 | 2.39E-01 |  |   |
| NAP1L5     | 1.5    | 1.0 | 2.8    | 1.9 | 5.99E-04 | 2.5    | 1.6 | 1.52E-01 |  |   |
| GLT8D2     | 3.2    | 1.0 | 5.9    | 1.9 | 6.64E-03 | 4.7    | 1.5 | 3.09E-01 |  |   |
| TMEM54     | 3.7    | 1.0 | 6.8    | 1.9 | 7.20E-03 | 5.3    | 1.5 | 1.58E-01 |  |   |
| DDAH2      | 12.7   | 1.0 | 23.5   | 1.9 | 4.36E-03 | 23.3   | 1.8 | 9.46E-01 |  |   |
| PRRX1      | 7.6    | 1.0 | 14.0   | 1.8 | 8.14E-03 | 15.7   | 2.1 | 4.63E-01 |  |   |
| LOX        | 1.4    | 1.0 | 2.5    | 1.8 | 2.85E-02 | 1.9    | 1.3 | 4.10E-01 |  |   |
| BCL6B      | 2.7    | 1.0 | 5.0    | 1.8 | 2.36E-03 | 4.5    | 1.7 | 5.59E-01 |  |   |
| SSPN       | 6.7    | 1.0 | 12.4   | 1.8 | 2.20E-04 | 9.0    | 1.3 | 8.73E-02 |  |   |
| C14orf179  | 4.9    | 1.0 | 9.0    | 1.8 | 9.80E-05 | 8.8    | 1.8 | 8.08E-01 |  |   |
| VEGFC      | 1.8    | 1.0 | 3.2    | 1.8 | 1.98E-03 | 2.2    | 1.3 | 5.49E-02 |  |   |
| SLC20A1    | 2.8    | 1.0 | 5.2    | 1.8 | 2.10E-03 | 5.4    | 1.9 | 7.93E-01 |  |   |
| LMF1       | 1.7    | 1.0 | 3.1    | 1.8 | 1.43E-02 | 3.1    | 1.8 | 9.63E-01 |  |   |

|              |        |     |        |     |          |        |      |          |   |   |
|--------------|--------|-----|--------|-----|----------|--------|------|----------|---|---|
| MYEF2        | 1.4    | 1.0 | 2.5    | 1.8 | 9.86E-06 | 2.2    | 1.6  | 3.16E-01 |   |   |
| LOXL2        | 1.4    | 1.0 | 2.6    | 1.8 | 5.38E-03 | 2.5    | 1.7  | 8.45E-01 |   |   |
| GDF11        | 2.3    | 1.0 | 4.2    | 1.8 | 2.55E-03 | 3.0    | 1.3  | 1.01E-01 |   |   |
| PNMA1        | 1.6    | 1.0 | 2.9    | 1.8 | 6.79E-04 | 2.3    | 1.4  | 2.06E-01 |   |   |
| ENC1         | 1.2    | 1.0 | 2.2    | 1.8 | 9.19E-03 | 1.7    | 1.5  | 4.60E-01 |   |   |
| ZBTB47       | 17.2   | 1.0 | 31.2   | 1.8 | 1.96E-03 | 23.8   | 1.4  | 1.05E-01 |   |   |
| FGF18        | 3.2    | 1.0 | 5.8    | 1.8 | 2.40E-02 | 4.6    | 1.4  | 4.50E-01 |   |   |
| CARD16       | 2.0    | 1.0 | 3.6    | 1.8 | 3.22E-02 | 2.8    | 1.4  | 2.10E-01 |   |   |
| AGRN         | 2.8    | 1.0 | 5.1    | 1.8 | 1.22E-02 | 4.0    | 1.4  | 1.94E-01 |   |   |
| JAM3         | 7.9    | 1.0 | 14.2   | 1.8 | 2.62E-04 | 11.3   | 1.4  | 9.58E-02 |   |   |
| COL21A1      | 5.8    | 1.0 | 10.4   | 1.8 | 3.44E-04 | 9.9    | 1.7  | 6.74E-01 |   |   |
| SRR          | 1.6    | 1.0 | 2.9    | 1.8 | 1.01E-04 | 2.0    | 1.2  | 2.77E-03 |   | √ |
| DYNC2L1      | 2.8    | 1.0 | 5.1    | 1.8 | 1.09E-04 | 3.8    | 1.3  | 4.95E-02 |   |   |
| RAI14        | 1.1    | 1.0 | 2.0    | 1.8 | 1.46E-02 | 1.6    | 1.4  | 2.44E-01 |   |   |
| ACTA1        | 1603.0 | 1.0 | 2858.3 | 1.8 | 3.80E-02 | 3957.4 | 2.5  | 1.39E-01 |   |   |
| TMEM60       | 2.5    | 1.0 | 4.5    | 1.8 | 2.62E-05 | 3.8    | 1.5  | 1.29E-01 |   |   |
| SACS         | 1.1    | 1.0 | 2.0    | 1.8 | 5.15E-03 | 1.5    | 1.4  | 1.32E-01 |   |   |
| C19orf66     | 3.2    | 1.0 | 5.8    | 1.8 | 1.47E-02 | 5.2    | 1.6  | 5.13E-01 |   |   |
| DLG4         | 2.2    | 1.0 | 3.9    | 1.8 | 3.35E-05 | 3.4    | 1.5  | 1.28E-01 |   |   |
| C20orf26     | 5.4    | 1.0 | 9.6    | 1.8 | 3.94E-03 | 6.6    | 1.2  | 6.85E-03 |   | √ |
| TLL2         | 1.0    | 1.0 | 1.7    | 1.8 | 2.74E-02 | 1.9    | 2.0  | 7.01E-01 |   |   |
| SCRN1        | 4.8    | 1.0 | 8.5    | 1.8 | 7.87E-04 | 6.7    | 1.4  | 1.68E-01 |   |   |
| LEPREL2      | 2.7    | 1.0 | 4.8    | 1.8 | 4.74E-03 | 4.5    | 1.7  | 7.68E-01 |   |   |
| DBP          | 1.4    | 1.0 | 2.5    | 1.8 | 4.18E-02 | 2.2    | 1.5  | 6.30E-01 |   |   |
| LOC100130705 | 0.3    | 1.0 | 0.6    | 1.8 | 2.73E-02 | 1.2    | 3.7  | 2.22E-02 |   |   |
| DDR1         | 4.2    | 1.0 | 7.4    | 1.8 | 1.97E-02 | 7.2    | 1.7  | 8.43E-01 |   |   |
| FAM102B      | 1.0    | 1.0 | 1.8    | 1.8 | 1.11E-02 | 1.5    | 1.5  | 3.90E-01 |   |   |
| RARG         | 2.7    | 1.0 | 4.8    | 1.8 | 4.75E-02 | 3.1    | 1.1  | 1.26E-01 |   |   |
| SPRY4        | 2.2    | 1.0 | 3.9    | 1.8 | 2.47E-03 | 3.8    | 1.7  | 9.49E-01 |   |   |
| USP11        | 9.9    | 1.0 | 17.3   | 1.8 | 2.95E-05 | 15.8   | 1.6  | 3.42E-01 |   |   |
| SERPINF1     | 72.4   | 1.0 | 127.2  | 1.8 | 3.83E-02 | 95.1   | 1.3  | 2.92E-01 |   |   |
| SDC2         | 9.3    | 1.0 | 16.3   | 1.8 | 8.01E-03 | 13.5   | 1.4  | 3.19E-01 |   |   |
| TMEM71       | 7.0    | 1.0 | 12.2   | 1.8 | 1.11E-02 | 13.5   | 1.9  | 4.94E-01 |   |   |
| DFNA5        | 1.6    | 1.0 | 2.8    | 1.8 | 1.51E-02 | 2.2    | 1.4  | 2.56E-01 |   |   |
| NRARP        | 2.1    | 1.0 | 3.7    | 1.8 | 5.21E-03 | 1.8    | -1.2 | 8.91E-04 |   |   |
| DYNLL1       | 36.2   | 1.0 | 63.4   | 1.8 | 1.95E-03 | 52.2   | 1.4  | 1.50E-01 |   |   |
| GARNL3       | 3.0    | 1.0 | 5.3    | 1.8 | 5.76E-04 | 4.3    | 1.4  | 1.94E-01 |   |   |
| ORMDL3       | 12.4   | 1.0 | 21.7   | 1.7 | 2.74E-05 | 19.3   | 1.6  | 1.66E-01 |   |   |
| DDX60        | 1.1    | 1.0 | 1.9    | 1.7 | 1.86E-02 | 1.3    | 1.2  | 1.46E-01 |   |   |
| SLCO2A1      | 3.6    | 1.0 | 6.3    | 1.7 | 1.95E-02 | 3.1    | -1.1 | 1.93E-02 |   |   |
| CTNND2       | 2.0    | 1.0 | 3.5    | 1.7 | 1.49E-02 | 2.4    | 1.2  | 1.29E-02 |   | √ |
| VWA5A        | 1.1    | 1.0 | 1.9    | 1.7 | 3.69E-02 | 1.4    | 1.2  | 2.23E-01 |   |   |
| ARHGAP1      | 17.8   | 1.0 | 31.1   | 1.7 | 2.02E-03 | 27.7   | 1.6  | 3.52E-01 |   |   |
| COP22        | 9.2    | 1.0 | 16.0   | 1.7 | 2.29E-03 | 12.8   | 1.4  | 1.27E-01 |   |   |
| DOK5         | 2.0    | 1.0 | 3.5    | 1.7 | 3.66E-02 | 3.3    | 1.6  | 8.22E-01 |   |   |
| TSPAN9       | 29.1   | 1.0 | 50.7   | 1.7 | 1.51E-04 | 42.5   | 1.5  | 8.00E-02 |   |   |
| PMEPA1       | 4.3    | 1.0 | 7.4    | 1.7 | 4.92E-04 | 6.2    | 1.5  | 2.01E-01 |   |   |
| LMO2         | 2.4    | 1.0 | 4.2    | 1.7 | 4.00E-02 | 2.2    | -1.1 | 2.43E-02 | √ | √ |
| IGF1         | 1.6    | 1.0 | 2.7    | 1.7 | 1.23E-02 | 3.1    | 1.9  | 6.10E-01 |   |   |
| PLEKHB1      | 2.6    | 1.0 | 4.4    | 1.7 | 1.31E-02 | 4.2    | 1.6  | 5.29E-01 |   |   |
| GSDMB        | 1.1    | 1.0 | 1.8    | 1.7 | 1.76E-02 | 1.8    | 1.7  | 8.22E-01 |   |   |
| HMGN2        | 22.5   | 1.0 | 38.5   | 1.7 | 2.97E-04 | 33.2   | 1.5  | 1.60E-01 |   |   |
| INPP5F       | 1.4    | 1.0 | 2.4    | 1.7 | 1.28E-02 | 2.2    | 1.5  | 6.35E-01 |   |   |
| DUSP8        | 3.3    | 1.0 | 5.6    | 1.7 | 1.46E-03 | 4.1    | 1.2  | 1.70E-02 |   | √ |
| FAM102A      | 3.0    | 1.0 | 5.1    | 1.7 | 9.20E-04 | 3.2    | 1.1  | 1.75E-02 | √ | √ |
| TMEM231      | 1.9    | 1.0 | 3.3    | 1.7 | 1.03E-04 | 2.6    | 1.4  | 7.39E-02 |   |   |
| PLXDC1       | 2.8    | 1.0 | 4.8    | 1.7 | 6.12E-03 | 4.7    | 1.7  | 9.23E-01 |   |   |
| TMEM22       | 1.1    | 1.0 | 1.9    | 1.7 | 1.30E-02 | 1.7    | 1.5  | 4.23E-01 |   |   |
| RRP12        | 3.3    | 1.0 | 5.7    | 1.7 | 8.21E-03 | 5.8    | 1.7  | 8.96E-01 |   |   |
| DAP          | 8.9    | 1.0 | 15.3   | 1.7 | 8.70E-03 | 11.6   | 1.3  | 2.23E-01 |   |   |
| CHST7        | 3.5    | 1.0 | 6.0    | 1.7 | 2.04E-02 | 5.0    | 1.4  | 3.95E-01 |   |   |
| DLL4         | 2.6    | 1.0 | 4.4    | 1.7 | 1.84E-03 | 4.9    | 1.9  | 6.79E-01 |   |   |
| HAUS1        | 2.2    | 1.0 | 3.7    | 1.7 | 1.46E-02 | 3.4    | 1.6  | 4.63E-01 |   |   |
| GNB3         | 2.0    | 1.0 | 3.4    | 1.7 | 1.46E-02 | 3.4    | 1.7  | 9.80E-01 |   |   |
| ACYP1        | 2.8    | 1.0 | 4.7    | 1.7 | 1.55E-03 | 3.6    | 1.3  | 3.80E-02 |   |   |
| ST8SIA5      | 1.3    | 1.0 | 2.2    | 1.7 | 3.11E-02 | 2.3    | 1.8  | 8.56E-01 |   |   |
| ODC1         | 15.0   | 1.0 | 25.6   | 1.7 | 6.40E-06 | 21.9   | 1.5  | 1.91E-02 |   |   |
| SC4MOL       | 1.4    | 1.0 | 2.4    | 1.7 | 1.61E-02 | 2.5    | 1.8  | 8.51E-01 |   |   |
| CMIP         | 2.0    | 1.0 | 3.5    | 1.7 | 1.97E-02 | 2.6    | 1.3  | 1.77E-01 |   |   |
| CPE          | 16.8   | 1.0 | 28.6   | 1.7 | 2.45E-02 | 25.4   | 1.5  | 5.80E-01 |   |   |
| FARP1        | 3.0    | 1.0 | 5.0    | 1.7 | 1.59E-02 | 4.9    | 1.7  | 9.06E-01 |   |   |
| SHB          | 1.9    | 1.0 | 3.2    | 1.7 | 1.30E-02 | 2.8    | 1.5  | 4.83E-01 |   |   |
| PDLIM3       | 42.5   | 1.0 | 71.9   | 1.7 | 4.49E-03 | 62.9   | 1.5  | 2.96E-01 |   |   |
| AFAP1        | 1.4    | 1.0 | 2.3    | 1.7 | 2.38E-02 | 1.7    | 1.2  | 2.67E-01 |   |   |
| ZNF300P1     | 1.0    | 1.0 | 1.6    | 1.7 | 9.22E-03 | 1.2    | 1.2  | 2.66E-03 |   | √ |
| SEMA5B       | 1.4    | 1.0 | 2.3    | 1.7 | 1.05E-02 | 2.2    | 1.6  | 7.28E-01 |   |   |
| CDC42EP5     | 1.9    | 1.0 | 3.2    | 1.7 | 4.43E-04 | 3.2    | 1.7  | 9.57E-01 |   |   |
| EGLN3        | 24.3   | 1.0 | 40.9   | 1.7 | 1.65E-02 | 42.7   | 1.8  | 8.59E-01 |   |   |
| TPBG         | 1.1    | 1.0 | 1.8    | 1.7 | 1.69E-02 | 1.5    | 1.4  | 3.91E-01 |   |   |
| AP3M2        | 3.1    | 1.0 | 5.1    | 1.7 | 2.56E-06 | 4.1    | 1.3  | 1.36E-02 |   |   |
| NES          | 34.7   | 1.0 | 58.2   | 1.7 | 3.31E-03 | 64.7   | 1.9  | 5.56E-01 |   |   |
| PCDHGA12     | 1.2    | 1.0 | 2.1    | 1.7 | 3.59E-02 | 1.5    | 1.2  | 2.57E-01 |   |   |
| SAP25        | 1.1    | 1.0 | 1.8    | 1.7 | 2.74E-02 | 1.8    | 1.7  | 9.66E-01 |   |   |
| TGFB1        | 4.7    | 1.0 | 7.9    | 1.7 | 1.66E-02 | 5.2    | 1.1  | 8.36E-02 |   |   |

|             |       |     |       |     |          |       |      |          |   |   |
|-------------|-------|-----|-------|-----|----------|-------|------|----------|---|---|
| EDNRA       | 4.5   | 1.0 | 7.6   | 1.7 | 3.03E-05 | 6.8   | 1.5  | 4.01E-01 |   |   |
| FAM43A      | 2.9   | 1.0 | 4.9   | 1.7 | 1.83E-02 | 3.2   | 1.1  | 4.53E-02 |   | ∨ |
| MAP2K3      | 9.2   | 1.0 | 15.4  | 1.7 | 2.54E-05 | 13.4  | 1.4  | 2.99E-01 |   |   |
| HIST1H2BK   | 2.7   | 1.0 | 4.5   | 1.7 | 1.88E-02 | 3.5   | 1.3  | 2.12E-01 |   |   |
| TMEM136     | 2.0   | 1.0 | 3.3   | 1.7 | 1.02E-03 | 2.3   | 1.1  | 1.11E-02 |   | ∨ |
| IRX3        | 9.6   | 1.0 | 15.9  | 1.7 | 4.30E-02 | 9.3   | -1.0 | 1.93E-02 | ∨ | ∨ |
| TMED3       | 7.3   | 1.0 | 12.1  | 1.7 | 6.63E-03 | 9.5   | 1.3  | 2.10E-01 |   |   |
| ASNS        | 3.2   | 1.0 | 5.4   | 1.7 | 5.38E-04 | 3.6   | 1.1  | 1.77E-03 |   | ∨ |
| UBE2Q2      | 5.4   | 1.0 | 9.0   | 1.7 | 8.44E-04 | 7.3   | 1.3  | 1.03E-01 |   |   |
| GAB2        | 4.4   | 1.0 | 7.3   | 1.7 | 1.31E-04 | 5.8   | 1.3  | 1.00E-01 |   |   |
| OTUD1       | 5.8   | 1.0 | 9.7   | 1.7 | 1.17E-02 | 21.2  | 3.6  | 7.25E-02 |   |   |
| NBPF14      | 4.1   | 1.0 | 6.7   | 1.7 | 8.99E-03 | 4.9   | 1.2  | 4.25E-02 |   | ∨ |
| NRIP2       | 1.3   | 1.0 | 2.2   | 1.7 | 2.74E-03 | 1.7   | 1.3  | 9.31E-02 |   |   |
| WTIP        | 3.9   | 1.0 | 6.4   | 1.7 | 3.44E-04 | 6.2   | 1.6  | 7.70E-01 |   |   |
| ST3GAL6     | 9.8   | 1.0 | 16.2  | 1.7 | 2.70E-03 | 13.6  | 1.4  | 1.95E-01 |   |   |
| IFT20       | 1.7   | 1.0 | 2.8   | 1.7 | 8.64E-03 | 2.5   | 1.5  | 5.48E-01 |   |   |
| SNHG9       | 2.3   | 1.0 | 3.9   | 1.7 | 3.57E-02 | 3.0   | 1.3  | 2.19E-01 |   |   |
| ATP13A3     | 8.5   | 1.0 | 14.1  | 1.7 | 3.61E-02 | 7.9   | -1.1 | 6.47E-02 |   |   |
| PGBD5       | 1.8   | 1.0 | 3.0   | 1.7 | 5.77E-04 | 2.1   | 1.2  | 3.06E-02 |   | ∨ |
| TRIP6       | 4.6   | 1.0 | 7.6   | 1.6 | 1.09E-02 | 6.8   | 1.5  | 4.96E-01 |   |   |
| XPC         | 4.0   | 1.0 | 6.6   | 1.6 | 7.15E-03 | 5.4   | 1.3  | 2.47E-01 |   |   |
| TSTD1       | 2.9   | 1.0 | 4.7   | 1.6 | 9.23E-03 | 3.8   | 1.3  | 1.27E-01 |   |   |
| SGCE        | 6.7   | 1.0 | 11.1  | 1.6 | 4.49E-02 | 9.6   | 1.4  | 5.17E-01 |   |   |
| EIF4EBP3    | 5.5   | 1.0 | 9.1   | 1.6 | 3.28E-02 | 12.0  | 2.2  | 2.28E-01 |   |   |
| ITH5        | 3.4   | 1.0 | 5.6   | 1.6 | 1.34E-02 | 6.0   | 1.8  | 7.09E-01 |   |   |
| BACE2       | 2.7   | 1.0 | 4.4   | 1.6 | 1.26E-02 | 3.0   | 1.1  | 1.00E-01 |   |   |
| VSNL1       | 3.5   | 1.0 | 5.8   | 1.6 | 1.41E-03 | 4.7   | 1.3  | 2.25E-02 |   |   |
| STK38L      | 9.3   | 1.0 | 15.2  | 1.6 | 3.76E-03 | 11.9  | 1.3  | 2.25E-01 |   |   |
| PLAGL1      | 4.1   | 1.0 | 6.7   | 1.6 | 2.96E-03 | 6.0   | 1.5  | 4.68E-01 |   |   |
| SLC27A3     | 1.9   | 1.0 | 3.1   | 1.6 | 1.34E-02 | 2.4   | 1.3  | 1.15E-01 |   |   |
| CHN1        | 2.8   | 1.0 | 4.6   | 1.6 | 6.02E-05 | 4.3   | 1.5  | 4.00E-01 |   |   |
| SEPT6       | 3.5   | 1.0 | 5.7   | 1.6 | 4.80E-03 | 4.7   | 1.4  | 2.77E-01 |   |   |
| CSPG4       | 3.2   | 1.0 | 5.2   | 1.6 | 1.08E-02 | 4.8   | 1.5  | 5.86E-01 |   |   |
| TUBA1A      | 49.4  | 1.0 | 81.0  | 1.6 | 2.21E-02 | 65.7  | 1.3  | 2.66E-01 |   |   |
| C6orf27     | 2.6   | 1.0 | 4.2   | 1.6 | 2.62E-03 | 3.5   | 1.4  | 3.89E-01 |   |   |
| MCAM        | 19.9  | 1.0 | 32.5  | 1.6 | 4.68E-02 | 23.5  | 1.2  | 1.75E-01 |   |   |
| FPGT-TNNI3K | 2.0   | 1.0 | 3.2   | 1.6 | 2.87E-02 | 2.3   | 1.2  | 5.79E-02 |   |   |
| MAP3K12     | 1.6   | 1.0 | 2.6   | 1.6 | 3.85E-02 | 2.0   | 1.2  | 2.45E-01 |   |   |
| CASP3       | 3.1   | 1.0 | 5.0   | 1.6 | 4.60E-03 | 5.3   | 1.7  | 6.61E-01 |   |   |
| KIAA0556    | 1.9   | 1.0 | 3.1   | 1.6 | 2.76E-04 | 2.7   | 1.4  | 2.92E-01 |   |   |
| PIGF        | 2.1   | 1.0 | 3.4   | 1.6 | 2.41E-03 | 2.9   | 1.4  | 1.78E-01 |   |   |
| IGFBP7      | 266.7 | 1.0 | 435.2 | 1.6 | 4.51E-02 | 350.1 | 1.3  | 3.60E-01 |   |   |
| C3orf58     | 1.2   | 1.0 | 2.0   | 1.6 | 3.51E-03 | 1.8   | 1.5  | 5.51E-01 |   |   |
| GADD45A     | 16.4  | 1.0 | 26.7  | 1.6 | 1.03E-02 | 32.7  | 2.0  | 2.10E-01 |   |   |
| AZIN1       | 9.0   | 1.0 | 14.8  | 1.6 | 5.01E-04 | 13.5  | 1.5  | 5.90E-01 |   |   |
| PCDHGA3     | 1.7   | 1.0 | 2.8   | 1.6 | 6.87E-05 | 2.2   | 1.3  | 5.09E-02 |   |   |
| KCNJ4       | 8.5   | 1.0 | 13.8  | 1.6 | 7.95E-05 | 14.6  | 1.7  | 6.06E-01 |   |   |
| MEOX2       | 3.1   | 1.0 | 5.1   | 1.6 | 3.26E-02 | 3.4   | 1.1  | 9.34E-02 |   |   |
| TP53INP2    | 27.0  | 1.0 | 43.9  | 1.6 | 1.37E-03 | 37.8  | 1.4  | 2.62E-01 |   |   |
| FGF1        | 9.0   | 1.0 | 14.6  | 1.6 | 1.69E-03 | 11.5  | 1.3  | 5.02E-02 |   |   |
| DLL1        | 2.5   | 1.0 | 4.0   | 1.6 | 3.12E-02 | 4.5   | 1.8  | 3.29E-01 |   |   |
| CD151       | 75.1  | 1.0 | 122.0 | 1.6 | 2.62E-02 | 85.4  | 1.1  | 2.59E-02 |   | ∨ |
| VAMP1       | 2.3   | 1.0 | 3.7   | 1.6 | 1.92E-02 | 2.4   | 1.0  | 2.40E-02 | ∨ | ∨ |
| VGLL4       | 5.4   | 1.0 | 8.7   | 1.6 | 2.67E-03 | 7.2   | 1.4  | 2.14E-01 |   |   |
| VAV2        | 1.4   | 1.0 | 2.2   | 1.6 | 4.53E-03 | 1.9   | 1.4  | 3.47E-01 |   |   |
| DHRS11      | 3.0   | 1.0 | 4.8   | 1.6 | 2.87E-03 | 4.6   | 1.5  | 6.77E-01 |   |   |
| SERPINH1    | 13.7  | 1.0 | 22.2  | 1.6 | 1.65E-02 | 16.8  | 1.2  | 2.12E-01 |   |   |
| SFXN3       | 3.9   | 1.0 | 6.3   | 1.6 | 3.08E-02 | 4.6   | 1.2  | 1.46E-01 |   |   |
| ENAH        | 3.7   | 1.0 | 5.9   | 1.6 | 5.87E-04 | 6.4   | 1.7  | 6.61E-01 |   |   |
| DNAJA4      | 31.3  | 1.0 | 50.6  | 1.6 | 5.28E-03 | 45.5  | 1.5  | 4.92E-01 |   |   |
| CXorf56     | 2.4   | 1.0 | 3.9   | 1.6 | 1.67E-06 | 3.5   | 1.4  | 1.54E-01 |   |   |
| B3GNT5      | 0.6   | 1.0 | 1.0   | 1.6 | 3.22E-02 | 1.5   | 2.5  | 1.42E-01 |   |   |
| TCTN3       | 3.5   | 1.0 | 5.7   | 1.6 | 2.78E-04 | 4.1   | 1.2  | 4.45E-02 |   | ∨ |
| CCND1       | 17.3  | 1.0 | 27.8  | 1.6 | 6.22E-05 | 22.2  | 1.3  | 8.45E-02 |   |   |
| VKORC1      | 13.0  | 1.0 | 21.0  | 1.6 | 1.97E-02 | 15.7  | 1.2  | 1.32E-01 |   |   |
| PPIP5K1     | 2.0   | 1.0 | 3.2   | 1.6 | 2.05E-05 | 2.6   | 1.3  | 9.07E-02 |   |   |
| RABL2B      | 1.7   | 1.0 | 2.7   | 1.6 | 1.38E-02 | 2.4   | 1.4  | 5.14E-01 |   |   |
| PACS1       | 11.5  | 1.0 | 18.4  | 1.6 | 7.67E-03 | 15.7  | 1.4  | 3.02E-01 |   |   |
| ANKRD29     | 1.8   | 1.0 | 2.8   | 1.6 | 8.37E-03 | 2.2   | 1.3  | 1.34E-01 |   |   |
| TRIM41      | 5.4   | 1.0 | 8.6   | 1.6 | 2.83E-07 | 7.5   | 1.4  | 7.88E-02 |   |   |
| SFRP1       | 9.9   | 1.0 | 16.0  | 1.6 | 3.24E-02 | 14.1  | 1.4  | 5.66E-01 |   |   |
| EVL         | 10.6  | 1.0 | 17.0  | 1.6 | 1.90E-04 | 14.1  | 1.3  | 1.29E-01 |   |   |
| MOBKLC2C    | 2.6   | 1.0 | 4.2   | 1.6 | 3.25E-03 | 4.6   | 1.8  | 4.14E-01 |   |   |
| TCEA2       | 4.5   | 1.0 | 7.2   | 1.6 | 2.99E-03 | 6.8   | 1.5  | 5.59E-01 |   |   |
| EML2        | 5.5   | 1.0 | 8.8   | 1.6 | 9.97E-06 | 7.3   | 1.3  | 2.05E-02 |   |   |
| P4HTM       | 5.9   | 1.0 | 9.5   | 1.6 | 2.87E-05 | 7.0   | 1.2  | 1.36E-04 |   | ∨ |
| IDUA        | 1.8   | 1.0 | 2.9   | 1.6 | 2.09E-02 | 2.6   | 1.5  | 6.21E-01 |   |   |
| CCDC28A     | 3.8   | 1.0 | 6.0   | 1.6 | 2.89E-04 | 5.9   | 1.6  | 7.50E-01 |   |   |
| SPATS2L     | 7.7   | 1.0 | 12.3  | 1.6 | 3.53E-02 | 10.1  | 1.3  | 3.49E-01 |   |   |
| TNFRSF10D   | 0.9   | 1.0 | 1.5   | 1.6 | 1.84E-02 | 1.6   | 1.7  | 7.69E-01 |   |   |
| ICOSLG      | 1.4   | 1.0 | 2.3   | 1.6 | 3.59E-02 | 1.7   | 1.2  | 2.17E-01 |   |   |
| MAPK4       | 6.5   | 1.0 | 10.4  | 1.6 | 1.78E-02 | 7.3   | 1.1  | 8.56E-02 |   |   |
| RTN3        | 12.4  | 1.0 | 19.8  | 1.6 | 2.92E-03 | 18.6  | 1.5  | 6.09E-01 |   |   |



|              |       |     |       |     |          |       |      |          |   |   |
|--------------|-------|-----|-------|-----|----------|-------|------|----------|---|---|
| RELL1        | 1.6   | 1.0 | 2.5   | 1.6 | 3.55E-04 | 2.2   | 1.4  | 1.62E-01 |   |   |
| PEX12        | 2.1   | 1.0 | 3.4   | 1.6 | 1.15E-06 | 2.6   | 1.2  | 2.09E-02 |   |   |
| ANO1         | 4.0   | 1.0 | 6.5   | 1.6 | 3.81E-02 | 6.0   | 1.5  | 7.78E-01 |   |   |
| MEX3D        | 1.1   | 1.0 | 1.8   | 1.6 | 2.08E-03 | 1.5   | 1.3  | 2.29E-01 |   |   |
| SLC26A11     | 1.1   | 1.0 | 1.8   | 1.6 | 2.36E-02 | 1.5   | 1.3  | 3.05E-01 |   |   |
| TMCO3        | 5.7   | 1.0 | 9.1   | 1.6 | 7.17E-03 | 7.7   | 1.3  | 3.08E-01 |   |   |
| ADAM19       | 2.2   | 1.0 | 3.6   | 1.6 | 2.49E-02 | 3.4   | 1.5  | 8.52E-01 |   |   |
| EHD3         | 6.1   | 1.0 | 9.8   | 1.6 | 1.58E-02 | 7.0   | 1.1  | 7.81E-02 |   |   |
| CXCR7        | 10.1  | 1.0 | 16.1  | 1.6 | 1.24E-03 | 9.0   | -1.1 | 3.54E-03 |   |   |
| MUTED-TXNDC5 | 1.2   | 1.0 | 1.9   | 1.6 | 4.85E-02 | 1.1   | -1.1 | 3.76E-03 | √ | √ |
| CEP164       | 1.4   | 1.0 | 2.2   | 1.6 | 2.53E-02 | 2.0   | 1.4  | 4.88E-01 |   |   |
| PRMT2        | 11.0  | 1.0 | 17.4  | 1.6 | 4.67E-03 | 15.5  | 1.4  | 4.31E-01 |   |   |
| CTF1         | 3.0   | 1.0 | 4.8   | 1.6 | 3.94E-03 | 5.6   | 1.8  | 1.69E-01 |   |   |
| FMNL3        | 1.8   | 1.0 | 2.8   | 1.6 | 1.54E-03 | 2.4   | 1.3  | 3.36E-01 |   |   |
| FAM13C       | 2.4   | 1.0 | 3.7   | 1.6 | 7.78E-03 | 3.6   | 1.5  | 7.69E-01 |   |   |
| PPP2R1B      | 1.6   | 1.0 | 2.5   | 1.6 | 1.94E-03 | 1.8   | 1.2  | 2.68E-02 |   | √ |
| TNK2         | 4.1   | 1.0 | 6.4   | 1.6 | 1.64E-02 | 5.0   | 1.2  | 8.74E-02 |   |   |
| ACTG1        | 94.7  | 1.0 | 149.2 | 1.6 | 4.80E-02 | 127.9 | 1.4  | 5.33E-01 |   |   |
| FUT8         | 1.7   | 1.0 | 2.6   | 1.6 | 1.42E-03 | 2.1   | 1.3  | 2.64E-01 |   |   |
| GPRASP1      | 3.3   | 1.0 | 5.2   | 1.6 | 4.83E-03 | 5.0   | 1.5  | 7.17E-01 |   |   |
| DLGAP4       | 9.8   | 1.0 | 15.4  | 1.6 | 6.35E-03 | 12.8  | 1.3  | 2.92E-01 |   |   |
| FAM156B      | 3.9   | 1.0 | 6.1   | 1.6 | 2.21E-02 | 5.6   | 1.5  | 4.92E-01 |   |   |
| CHST14       | 2.7   | 1.0 | 4.2   | 1.6 | 4.91E-02 | 3.5   | 1.3  | 3.98E-01 |   |   |
| YPEL2        | 6.7   | 1.0 | 10.6  | 1.6 | 7.46E-04 | 8.3   | 1.2  | 1.01E-01 |   |   |
| PMM1         | 5.8   | 1.0 | 9.0   | 1.6 | 5.49E-03 | 7.4   | 1.3  | 3.19E-02 |   |   |
| RGS3         | 19.8  | 1.0 | 31.1  | 1.6 | 2.59E-03 | 24.0  | 1.2  | 9.79E-02 |   |   |
| ALPK3        | 20.8  | 1.0 | 32.6  | 1.6 | 5.84E-03 | 27.4  | 1.3  | 1.91E-01 |   |   |
| ID3          | 22.9  | 1.0 | 35.9  | 1.6 | 2.28E-02 | 26.7  | 1.2  | 1.44E-01 |   |   |
| C1orf63      | 10.9  | 1.0 | 17.0  | 1.6 | 2.09E-03 | 17.5  | 1.6  | 7.78E-01 |   |   |
| MALL         | 2.8   | 1.0 | 4.3   | 1.6 | 2.92E-02 | 2.3   | -1.2 | 1.05E-02 |   |   |
| ARHGAP24     | 3.5   | 1.0 | 5.5   | 1.6 | 4.96E-03 | 4.6   | 1.3  | 1.73E-01 |   |   |
| PRR24        | 4.0   | 1.0 | 6.3   | 1.6 | 2.88E-02 | 6.4   | 1.6  | 9.11E-01 |   |   |
| SRPX2        | 2.8   | 1.0 | 4.4   | 1.6 | 4.56E-02 | 3.8   | 1.4  | 5.99E-01 |   |   |
| TGDS         | 1.5   | 1.0 | 2.3   | 1.6 | 3.58E-04 | 2.2   | 1.5  | 5.10E-01 |   |   |
| CEMP1        | 1.4   | 1.0 | 2.2   | 1.6 | 1.34E-02 | 1.8   | 1.3  | 6.61E-02 |   |   |
| KIAA1949     | 3.7   | 1.0 | 5.8   | 1.6 | 2.49E-02 | 4.5   | 1.2  | 2.36E-01 |   |   |
| MICALL2      | 1.9   | 1.0 | 3.0   | 1.6 | 1.30E-02 | 2.5   | 1.3  | 2.45E-01 |   |   |
| MED30        | 2.5   | 1.0 | 3.9   | 1.6 | 1.30E-04 | 3.6   | 1.5  | 4.89E-01 |   |   |
| TGFBI        | 13.8  | 1.0 | 21.6  | 1.6 | 1.44E-02 | 17.4  | 1.3  | 3.50E-01 |   |   |
| PDGFA        | 2.8   | 1.0 | 4.3   | 1.6 | 1.73E-02 | 3.5   | 1.3  | 3.64E-01 |   |   |
| RRAS2        | 8.1   | 1.0 | 12.7  | 1.6 | 4.41E-02 | 19.4  | 2.4  | 1.82E-01 |   |   |
| TWSG1        | 3.1   | 1.0 | 4.9   | 1.6 | 1.20E-02 | 4.3   | 1.4  | 3.96E-01 |   |   |
| HSPB1        | 494.9 | 1.0 | 771.0 | 1.6 | 1.24E-03 | 779.9 | 1.6  | 9.30E-01 |   |   |
| ANGPTL2      | 9.3   | 1.0 | 14.4  | 1.6 | 1.39E-02 | 12.1  | 1.3  | 4.53E-01 |   |   |
| PFN2         | 13.0  | 1.0 | 20.2  | 1.6 | 6.87E-03 | 14.4  | 1.1  | 3.94E-02 |   | √ |
| NAB2         | 2.8   | 1.0 | 4.4   | 1.6 | 3.93E-03 | 2.9   | 1.0  | 2.34E-02 | √ | √ |
| SH3YL1       | 2.1   | 1.0 | 3.2   | 1.6 | 6.87E-04 | 3.0   | 1.4  | 4.52E-01 |   |   |
| EHMT2        | 2.7   | 1.0 | 4.2   | 1.6 | 1.66E-02 | 3.4   | 1.3  | 1.96E-01 |   |   |
| PLEKHO2      | 2.9   | 1.0 | 4.5   | 1.6 | 2.29E-02 | 3.4   | 1.2  | 2.78E-01 |   |   |
| ARRDC3       | 2.8   | 1.0 | 4.3   | 1.6 | 8.44E-03 | 4.9   | 1.7  | 6.49E-01 |   |   |
| HSPA1B       | 29.7  | 1.0 | 46.0  | 1.6 | 7.07E-03 | 50.8  | 1.7  | 6.58E-01 |   |   |
| C11orf95     | 1.6   | 1.0 | 2.5   | 1.6 | 1.52E-03 | 1.8   | 1.1  | 6.55E-02 |   |   |
| TERF2IP      | 17.6  | 1.0 | 27.3  | 1.6 | 5.29E-07 | 24.3  | 1.4  | 1.25E-01 |   |   |
| BHLHE41      | 2.7   | 1.0 | 4.2   | 1.5 | 8.56E-03 | 2.7   | 1.0  | 1.63E-01 |   |   |
| C7orf60      | 2.8   | 1.0 | 4.3   | 1.5 | 2.54E-02 | 2.9   | 1.0  | 7.80E-02 |   |   |
| COMT         | 10.3  | 1.0 | 15.9  | 1.5 | 8.35E-04 | 14.0  | 1.4  | 1.70E-01 |   |   |
| MAP3K3       | 9.5   | 1.0 | 14.7  | 1.5 | 1.23E-04 | 14.0  | 1.5  | 7.20E-01 |   |   |
| YWHAQ        | 45.7  | 1.0 | 70.8  | 1.5 | 9.43E-05 | 61.7  | 1.3  | 2.31E-01 |   |   |
| ANKRD13D     | 2.8   | 1.0 | 4.3   | 1.5 | 4.88E-03 | 3.1   | 1.1  | 3.37E-02 |   | √ |
| GLRB         | 2.3   | 1.0 | 3.6   | 1.5 | 9.92E-04 | 2.9   | 1.3  | 8.11E-02 |   |   |
| TCTN1        | 2.7   | 1.0 | 4.3   | 1.5 | 3.07E-02 | 2.9   | 1.0  | 3.84E-02 | √ | √ |
| C22orf25     | 8.0   | 1.0 | 12.4  | 1.5 | 1.01E-02 | 9.0   | 1.1  | 9.66E-03 |   | √ |
| PCDHGA2      | 1.9   | 1.0 | 3.0   | 1.5 | 4.46E-04 | 2.2   | 1.1  | 1.39E-02 |   | √ |
| PGCP         | 9.2   | 1.0 | 14.2  | 1.5 | 4.71E-02 | 11.1  | 1.2  | 3.13E-01 |   |   |
| DIXDC1       | 4.0   | 1.0 | 6.2   | 1.5 | 3.14E-03 | 4.9   | 1.2  | 1.64E-01 |   |   |
| TTC8         | 2.4   | 1.0 | 3.7   | 1.5 | 5.27E-04 | 3.1   | 1.3  | 2.11E-01 |   |   |
| DYRK1B       | 5.0   | 1.0 | 7.7   | 1.5 | 2.54E-05 | 7.4   | 1.5  | 5.94E-01 |   |   |
| RRAGB        | 2.9   | 1.0 | 4.4   | 1.5 | 9.71E-04 | 3.2   | 1.1  | 6.10E-03 |   | √ |
| LHPP         | 2.1   | 1.0 | 3.2   | 1.5 | 1.02E-02 | 3.1   | 1.5  | 8.82E-01 |   |   |
| MT1L         | 6.1   | 1.0 | 9.4   | 1.5 | 6.42E-04 | 8.1   | 1.3  | 2.40E-01 |   |   |
| SQSTM1       | 68.2  | 1.0 | 105.2 | 1.5 | 3.97E-06 | 91.0  | 1.3  | 5.85E-02 |   |   |
| AGPAT9       | 10.2  | 1.0 | 15.7  | 1.5 | 3.50E-02 | 13.5  | 1.3  | 4.06E-01 |   |   |
| DLG5         | 2.3   | 1.0 | 3.6   | 1.5 | 4.20E-03 | 3.1   | 1.3  | 3.03E-01 |   |   |
| CHRNB1       | 1.6   | 1.0 | 2.5   | 1.5 | 1.31E-02 | 1.6   | 1.0  | 1.72E-02 | √ | √ |
| TSC2D2       | 3.7   | 1.0 | 5.7   | 1.5 | 9.44E-04 | 6.1   | 1.7  | 6.35E-01 |   |   |
| PATZ1        | 2.7   | 1.0 | 4.2   | 1.5 | 1.34E-04 | 3.4   | 1.2  | 3.27E-02 |   |   |
| C15orf39     | 2.0   | 1.0 | 3.1   | 1.5 | 1.93E-02 | 2.6   | 1.3  | 4.48E-01 |   |   |
| C1orf54      | 3.3   | 1.0 | 5.0   | 1.5 | 9.89E-03 | 4.5   | 1.4  | 6.08E-01 |   |   |
| GAB3         | 4.5   | 1.0 | 6.8   | 1.5 | 5.14E-03 | 4.7   | 1.1  | 1.22E-02 | √ | √ |
| ZNF853       | 2.2   | 1.0 | 3.3   | 1.5 | 6.16E-04 | 2.7   | 1.3  | 8.95E-02 |   |   |
| OAT          | 9.9   | 1.0 | 15.2  | 1.5 | 1.17E-03 | 12.6  | 1.3  | 2.47E-01 |   |   |
| CASC4        | 6.1   | 1.0 | 9.3   | 1.5 | 1.55E-02 | 7.7   | 1.3  | 3.62E-01 |   |   |
| LIMA1        | 6.9   | 1.0 | 10.5  | 1.5 | 3.11E-02 | 9.5   | 1.4  | 5.82E-01 |   |   |

|             |       |     |       |     |          |       |      |          |   |   |
|-------------|-------|-----|-------|-----|----------|-------|------|----------|---|---|
| WEE1        | 7.8   | 1.0 | 12.0  | 1.5 | 2.40E-03 | 11.2  | 1.4  | 5.58E-01 |   |   |
| UGDH        | 1.7   | 1.0 | 2.5   | 1.5 | 4.45E-02 | 2.0   | 1.2  | 3.11E-01 |   |   |
| CCDC85B     | 5.3   | 1.0 | 8.2   | 1.5 | 1.50E-02 | 7.1   | 1.3  | 3.79E-01 |   |   |
| COMMD3-BMI1 | 2.5   | 1.0 | 3.8   | 1.5 | 7.27E-03 | 3.5   | 1.4  | 4.00E-01 |   |   |
| MED31       | 1.6   | 1.0 | 2.5   | 1.5 | 9.60E-04 | 1.8   | 1.1  | 1.66E-03 | ∨ | ∨ |
| TRIM4       | 1.5   | 1.0 | 2.3   | 1.5 | 1.01E-02 | 1.8   | 1.2  | 1.89E-01 |   |   |
| SIK2        | 4.7   | 1.0 | 7.1   | 1.5 | 3.03E-03 | 4.8   | 1.0  | 2.52E-03 | ∨ | ∨ |
| DALRD3      | 2.6   | 1.0 | 4.0   | 1.5 | 7.90E-03 | 3.4   | 1.3  | 9.43E-02 |   |   |
| TMEM140     | 8.8   | 1.0 | 13.4  | 1.5 | 4.92E-03 | 12.8  | 1.5  | 7.35E-01 |   |   |
| ALDH3A2     | 10.6  | 1.0 | 16.2  | 1.5 | 2.61E-03 | 12.1  | 1.1  | 7.27E-02 |   |   |
| NAP1L2      | 2.5   | 1.0 | 3.8   | 1.5 | 1.16E-02 | 3.2   | 1.3  | 5.53E-02 |   |   |
| C19orf20    | 1.8   | 1.0 | 2.7   | 1.5 | 3.36E-02 | 2.3   | 1.3  | 1.77E-01 |   |   |
| NFE2L2      | 16.7  | 1.0 | 25.4  | 1.5 | 2.88E-04 | 22.7  | 1.4  | 4.45E-01 |   |   |
| TMEM161A    | 4.5   | 1.0 | 6.9   | 1.5 | 1.86E-03 | 6.2   | 1.4  | 2.62E-01 |   |   |
| COPS7B      | 6.1   | 1.0 | 9.3   | 1.5 | 8.85E-05 | 8.2   | 1.3  | 7.59E-02 |   |   |
| UBE2H       | 23.4  | 1.0 | 35.6  | 1.5 | 8.72E-05 | 33.5  | 1.4  | 5.47E-01 |   |   |
| C6orf145    | 5.7   | 1.0 | 8.7   | 1.5 | 3.71E-02 | 12.4  | 2.2  | 8.09E-02 |   |   |
| PLBD1       | 10.3  | 1.0 | 15.7  | 1.5 | 2.32E-03 | 11.8  | 1.1  | 9.50E-02 |   |   |
| IL10RB      | 2.6   | 1.0 | 3.9   | 1.5 | 3.18E-02 | 2.9   | 1.1  | 6.94E-02 |   |   |
| NPDC1       | 16.1  | 1.0 | 24.3  | 1.5 | 5.12E-03 | 21.0  | 1.3  | 1.43E-01 |   |   |
| SLC16A5     | 2.8   | 1.0 | 4.2   | 1.5 | 3.23E-02 | 3.4   | 1.2  | 1.74E-01 |   |   |
| ALKBH6      | 2.4   | 1.0 | 3.6   | 1.5 | 9.78E-03 | 3.1   | 1.3  | 1.89E-01 |   |   |
| KLHL13      | 2.5   | 1.0 | 3.8   | 1.5 | 8.20E-03 | 2.7   | 1.1  | 7.58E-04 | ∨ | ∨ |
| BRF2        | 2.9   | 1.0 | 4.3   | 1.5 | 1.32E-04 | 3.5   | 1.2  | 2.17E-02 |   |   |
| FSTL1       | 53.6  | 1.0 | 81.1  | 1.5 | 1.26E-03 | 66.9  | 1.2  | 1.24E-01 |   |   |
| METRNL      | 7.3   | 1.0 | 11.0  | 1.5 | 2.45E-03 | 10.4  | 1.4  | 3.23E-01 |   |   |
| JAK2        | 6.0   | 1.0 | 9.1   | 1.5 | 1.40E-02 | 12.2  | 2.0  | 2.60E-01 |   |   |
| ALDH18A1    | 2.6   | 1.0 | 3.9   | 1.5 | 1.74E-02 | 3.1   | 1.2  | 2.44E-01 |   |   |
| NDRG1       | 23.4  | 1.0 | 35.4  | 1.5 | 3.61E-02 | 28.1  | 1.2  | 2.69E-01 |   |   |
| ZNF83       | 7.1   | 1.0 | 10.7  | 1.5 | 2.78E-04 | 9.8   | 1.4  | 3.49E-01 |   |   |
| LMOD2       | 239.1 | 1.0 | 361.1 | 1.5 | 2.40E-02 | 543.1 | 2.3  | 9.74E-02 |   |   |
| ZSCAN18     | 11.0  | 1.0 | 16.6  | 1.5 | 8.50E-04 | 14.0  | 1.3  | 6.51E-02 |   |   |
| TP53        | 1.7   | 1.0 | 2.5   | 1.5 | 2.77E-02 | 2.0   | 1.2  | 2.54E-01 |   |   |
| MYPN        | 26.8  | 1.0 | 40.4  | 1.5 | 1.36E-02 | 42.7  | 1.6  | 7.93E-01 |   |   |
| SKI         | 7.1   | 1.0 | 10.7  | 1.5 | 1.76E-02 | 8.1   | 1.1  | 1.42E-01 |   |   |
| CKS2        | 1.4   | 1.0 | 2.1   | 1.5 | 3.51E-02 | 2.4   | 1.8  | 5.27E-01 |   |   |
| ZNF404      | 2.3   | 1.0 | 3.5   | 1.5 | 4.09E-03 | 3.4   | 1.5  | 7.94E-01 |   |   |
| C16orf58    | 7.8   | 1.0 | 11.7  | 1.5 | 5.64E-03 | 10.8  | 1.4  | 4.03E-01 |   |   |
| GHDC        | 1.4   | 1.0 | 2.1   | 1.5 | 3.39E-02 | 1.5   | 1.1  | 1.07E-01 |   |   |
| SERTAD1     | 4.0   | 1.0 | 6.1   | 1.5 | 7.24E-03 | 8.3   | 2.1  | 3.48E-01 |   |   |
| MAP4        | 77.1  | 1.0 | 116.0 | 1.5 | 1.35E-03 | 118.4 | 1.5  | 8.85E-01 |   |   |
| HY1         | 4.4   | 1.0 | 6.6   | 1.5 | 1.56E-02 | 6.4   | 1.5  | 7.58E-01 |   |   |
| NOTCH2      | 3.4   | 1.0 | 5.1   | 1.5 | 1.28E-02 | 3.9   | 1.1  | 2.14E-01 |   |   |
| MOSC1       | 2.5   | 1.0 | 3.7   | 1.5 | 4.36E-02 | 2.7   | 1.1  | 2.96E-02 | ∨ | ∨ |
| ST6GALNAC4  | 6.5   | 1.0 | 9.8   | 1.5 | 5.87E-03 | 7.8   | 1.2  | 6.89E-02 |   |   |
| RNF40       | 6.4   | 1.0 | 9.6   | 1.5 | 4.96E-05 | 7.3   | 1.1  | 6.95E-03 |   |   |
| SLC25A5     | 37.4  | 1.0 | 56.1  | 1.5 | 5.37E-04 | 52.0  | 1.4  | 1.93E-01 |   |   |
| SEMA3G      | 4.2   | 1.0 | 6.3   | 1.5 | 3.20E-03 | 5.1   | 1.2  | 9.06E-02 |   |   |
| ZC3H12A     | 1.1   | 1.0 | 1.7   | 1.5 | 2.59E-03 | 2.0   | 1.8  | 4.81E-01 |   |   |
| TK2         | 2.3   | 1.0 | 3.4   | 1.5 | 2.92E-03 | 3.0   | 1.3  | 1.96E-01 |   |   |
| BCL2L11     | 1.4   | 1.0 | 2.1   | 1.5 | 1.90E-02 | 2.0   | 1.5  | 8.71E-01 |   |   |
| NFKB2       | 3.2   | 1.0 | 4.8   | 1.5 | 1.09E-02 | 4.7   | 1.5  | 8.87E-01 |   |   |
| TEF         | 4.0   | 1.0 | 6.0   | 1.5 | 3.16E-02 | 4.3   | 1.1  | 7.80E-02 |   |   |
| PPP1R15A    | 28.5  | 1.0 | 42.6  | 1.5 | 2.30E-02 | 45.6  | 1.6  | 7.52E-01 |   |   |
| NCDN        | 5.4   | 1.0 | 8.0   | 1.5 | 9.03E-04 | 6.7   | 1.2  | 3.84E-02 |   |   |
| DIAPH1      | 10.0  | 1.0 | 15.0  | 1.5 | 6.65E-03 | 14.2  | 1.4  | 7.56E-01 |   |   |
| RANBP10     | 2.5   | 1.0 | 3.7   | 1.5 | 5.65E-05 | 3.2   | 1.3  | 2.69E-02 |   |   |
| ARAP1       | 7.4   | 1.0 | 11.1  | 1.5 | 4.06E-04 | 8.3   | 1.1  | 9.63E-03 |   | ∨ |
| PHF19       | 2.3   | 1.0 | 3.5   | 1.5 | 2.03E-02 | 2.9   | 1.2  | 2.30E-01 |   |   |
| ZNF467      | 1.6   | 1.0 | 2.4   | 1.5 | 2.95E-02 | 1.5   | -1.0 | 2.44E-02 | ∨ | ∨ |
| TRAFD1      | 5.7   | 1.0 | 8.5   | 1.5 | 1.03E-03 | 8.1   | 1.4  | 7.23E-01 |   |   |
| GALNT10     | 2.6   | 1.0 | 3.9   | 1.5 | 1.23E-02 | 2.9   | 1.1  | 8.87E-02 |   |   |
| RARA        | 3.5   | 1.0 | 5.2   | 1.5 | 4.02E-02 | 4.4   | 1.2  | 4.02E-01 |   |   |
| RFX5        | 3.4   | 1.0 | 5.1   | 1.5 | 9.15E-04 | 4.0   | 1.2  | 2.46E-02 |   |   |
| APBB3       | 3.0   | 1.0 | 4.5   | 1.5 | 3.40E-03 | 4.6   | 1.5  | 7.18E-01 |   |   |
| ATP6AP2     | 12.9  | 1.0 | 19.2  | 1.5 | 1.28E-02 | 14.9  | 1.2  | 1.60E-01 |   |   |
| DDIT3       | 7.8   | 1.0 | 11.6  | 1.5 | 2.11E-02 | 10.3  | 1.3  | 3.51E-01 |   |   |
| STMN1       | 12.6  | 1.0 | 18.8  | 1.5 | 5.09E-03 | 17.2  | 1.4  | 4.08E-01 |   |   |
| R3HDM2      | 8.6   | 1.0 | 12.9  | 1.5 | 2.55E-05 | 11.1  | 1.3  | 7.69E-02 |   |   |
| PDGFD       | 5.5   | 1.0 | 8.2   | 1.5 | 4.14E-02 | 7.3   | 1.3  | 6.56E-01 |   |   |
| C9orf119    | 4.4   | 1.0 | 6.5   | 1.5 | 8.49E-04 | 5.3   | 1.2  | 3.06E-02 |   |   |
| PILRB       | 6.9   | 1.0 | 10.3  | 1.5 | 5.16E-03 | 10.2  | 1.5  | 9.32E-01 |   |   |
| ARF4        | 23.7  | 1.0 | 35.3  | 1.5 | 2.11E-03 | 31.0  | 1.3  | 3.23E-01 |   |   |
| GNL1        | 1.6   | 1.0 | 2.4   | 1.5 | 6.04E-04 | 2.2   | 1.3  | 3.27E-01 |   |   |
| GMDS        | 1.6   | 1.0 | 2.3   | 1.5 | 1.02E-02 | 2.1   | 1.3  | 4.90E-01 |   |   |
| HES4        | 4.7   | 1.0 | 7.0   | 1.5 | 1.27E-02 | 8.7   | 1.8  | 2.05E-01 |   |   |
| DNNTIP1     | 5.6   | 1.0 | 8.4   | 1.5 | 5.83E-03 | 8.4   | 1.5  | 9.92E-01 |   |   |
| KIFAP3      | 13.1  | 1.0 | 19.4  | 1.5 | 2.74E-02 | 14.1  | 1.1  | 6.62E-02 |   |   |
| GNB5        | 1.6   | 1.0 | 2.4   | 1.5 | 1.58E-02 | 1.8   | 1.2  | 1.83E-01 |   |   |
| PAAF1       | 3.4   | 1.0 | 5.1   | 1.5 | 2.98E-03 | 5.1   | 1.5  | 8.95E-01 |   |   |
| SEC31A      | 20.3  | 1.0 | 30.0  | 1.5 | 9.80E-06 | 28.5  | 1.4  | 6.34E-01 |   |   |
| SORBS2      | 130.3 | 1.0 | 193.0 | 1.5 | 1.08E-02 | 142.6 | 1.1  | 3.88E-02 | ∨ | ∨ |
| CHID1       | 5.4   | 1.0 | 8.0   | 1.5 | 1.07E-03 | 6.5   | 1.2  | 4.84E-02 |   |   |
| PEX16       | 2.2   | 1.0 | 3.2   | 1.5 | 6.53E-05 | 3.0   | 1.4  | 3.74E-01 |   |   |

|           |       |     |       |     |          |       |      |          |   |   |
|-----------|-------|-----|-------|-----|----------|-------|------|----------|---|---|
| NPM3      | 1.6   | 1.0 | 2.4   | 1.5 | 1.52E-02 | 1.9   | 1.2  | 8.80E-02 |   |   |
| ITPRIPL2  | 1.8   | 1.0 | 2.7   | 1.5 | 3.79E-02 | 2.2   | 1.2  | 3.05E-01 |   |   |
| HMGB2     | 11.8  | 1.0 | 17.5  | 1.5 | 2.90E-03 | 15.9  | 1.3  | 3.33E-01 |   |   |
| TRAF2     | 1.7   | 1.0 | 2.6   | 1.5 | 1.07E-03 | 2.3   | 1.3  | 3.73E-01 |   |   |
| OGG1      | 1.8   | 1.0 | 2.7   | 1.5 | 5.04E-03 | 2.1   | 1.2  | 4.40E-02 |   |   |
| LIMK2     | 2.8   | 1.0 | 4.1   | 1.5 | 3.31E-04 | 3.7   | 1.3  | 2.75E-01 |   |   |
| SEMA4C    | 5.1   | 1.0 | 7.5   | 1.5 | 1.91E-02 | 6.1   | 1.2  | 1.61E-01 |   |   |
| ACBD4     | 2.6   | 1.0 | 3.9   | 1.5 | 2.47E-02 | 3.2   | 1.2  | 2.28E-01 |   |   |
| PRKD2     | 2.9   | 1.0 | 4.3   | 1.5 | 1.55E-02 | 3.9   | 1.3  | 4.16E-01 |   |   |
| KCTD2     | 7.4   | 1.0 | 11.0  | 1.5 | 7.10E-04 | 9.4   | 1.3  | 1.26E-01 |   |   |
| TMEM80    | 3.1   | 1.0 | 4.6   | 1.5 | 3.47E-02 | 3.5   | 1.1  | 1.32E-02 |   |   |
| SLC22A18  | 2.8   | 1.0 | 4.1   | 1.5 | 1.38E-02 | 3.4   | 1.2  | 1.29E-01 |   |   |
| CRY2      | 15.5  | 1.0 | 22.9  | 1.5 | 3.41E-02 | 16.8  | 1.1  | 5.41E-02 |   |   |
| C1orf198  | 10.1  | 1.0 | 14.8  | 1.5 | 4.79E-02 | 13.9  | 1.4  | 7.11E-01 |   |   |
| COQ10B    | 6.3   | 1.0 | 9.3   | 1.5 | 2.01E-05 | 7.1   | 1.1  | 1.61E-03 |   |   |
| ABCA3     | 1.9   | 1.0 | 2.8   | 1.5 | 2.19E-03 | 2.1   | 1.1  | 3.62E-02 | v | v |
| HDAC9     | 2.7   | 1.0 | 4.0   | 1.5 | 2.53E-02 | 4.2   | 1.5  | 7.72E-01 |   |   |
| FUBP3     | 7.6   | 1.0 | 11.2  | 1.5 | 1.77E-04 | 9.4   | 1.2  | 5.73E-02 |   |   |
| ITPRIP    | 9.5   | 1.0 | 13.9  | 1.5 | 2.55E-02 | 20.0  | 2.1  | 3.89E-02 |   |   |
| SLC40A1   | 10.8  | 1.0 | 15.9  | 1.5 | 5.29E-03 | 9.0   | -1.2 | 3.87E-03 |   |   |
| ZNF251    | 3.5   | 1.0 | 5.2   | 1.5 | 5.22E-03 | 5.4   | 1.5  | 6.89E-01 |   |   |
| MARCH3    | 2.6   | 1.0 | 3.8   | 1.5 | 1.55E-02 | 3.5   | 1.3  | 4.37E-01 |   |   |
| PAFAH2    | 2.4   | 1.0 | 3.6   | 1.5 | 2.50E-03 | 2.7   | 1.1  | 4.85E-02 |   |   |
| POLR1E    | 3.3   | 1.0 | 4.8   | 1.5 | 1.97E-03 | 4.3   | 1.3  | 3.10E-01 |   |   |
| C8orf76   | 3.2   | 1.0 | 4.8   | 1.5 | 2.62E-04 | 3.6   | 1.1  | 2.53E-02 |   |   |
| BLOC1S2   | 4.0   | 1.0 | 5.8   | 1.5 | 7.62E-03 | 4.8   | 1.2  | 4.65E-02 |   |   |
| TLE4      | 1.7   | 1.0 | 2.5   | 1.5 | 4.99E-03 | 2.2   | 1.3  | 3.26E-01 |   |   |
| FAM177A1  | 7.1   | 1.0 | 10.5  | 1.5 | 2.11E-03 | 9.5   | 1.3  | 3.61E-01 |   |   |
| CDC42SE1  | 6.4   | 1.0 | 9.4   | 1.5 | 1.24E-03 | 9.9   | 1.5  | 6.92E-01 |   |   |
| CASQ1     | 10.8  | 1.0 | 15.8  | 1.5 | 7.78E-03 | 20.0  | 1.9  | 1.65E-01 |   |   |
| RABEPK    | 3.1   | 1.0 | 4.6   | 1.5 | 2.34E-03 | 3.9   | 1.2  | 1.08E-01 |   |   |
| DCAKD     | 3.7   | 1.0 | 5.4   | 1.5 | 3.33E-04 | 4.9   | 1.3  | 2.67E-01 |   |   |
| LRRC23    | 2.4   | 1.0 | 3.5   | 1.5 | 2.17E-02 | 3.2   | 1.4  | 5.37E-01 |   |   |
| MFGE8     | 127.8 | 1.0 | 187.4 | 1.5 | 4.61E-02 | 150.7 | 1.2  | 1.91E-01 |   |   |
| MPV17     | 9.9   | 1.0 | 14.5  | 1.5 | 1.58E-03 | 12.4  | 1.3  | 2.55E-02 |   |   |
| DYNLT3    | 5.5   | 1.0 | 8.1   | 1.5 | 3.58E-02 | 6.7   | 1.2  | 2.99E-01 |   |   |
| LIPE      | 3.1   | 1.0 | 4.6   | 1.5 | 3.98E-03 | 3.8   | 1.2  | 1.17E-01 |   |   |
| CYB5R1    | 46.3  | 1.0 | 67.8  | 1.5 | 2.23E-04 | 58.9  | 1.3  | 1.03E-01 |   |   |
| CC2D2A    | 1.7   | 1.0 | 2.4   | 1.5 | 4.15E-02 | 1.5   | -1.1 | 7.76E-02 |   |   |
| LRP3      | 3.8   | 1.0 | 5.5   | 1.5 | 5.89E-03 | 4.8   | 1.3  | 2.78E-01 |   |   |
| LENG1     | 4.8   | 1.0 | 7.0   | 1.5 | 2.30E-03 | 6.4   | 1.3  | 3.59E-01 |   |   |
| CLSTN1    | 11.5  | 1.0 | 16.8  | 1.5 | 3.57E-03 | 12.7  | 1.1  | 4.50E-02 |   |   |
| SUMF2     | 6.6   | 1.0 | 9.6   | 1.5 | 2.18E-02 | 7.3   | 1.1  | 1.18E-01 |   |   |
| C11orf61  | 1.5   | 1.0 | 2.1   | 1.5 | 2.05E-02 | 2.1   | 1.4  | 8.39E-01 |   |   |
| STK19     | 2.3   | 1.0 | 3.3   | 1.5 | 3.41E-03 | 3.0   | 1.3  | 1.08E-01 |   |   |
| FAM188A   | 3.1   | 1.0 | 4.5   | 1.5 | 3.22E-03 | 4.0   | 1.3  | 2.86E-01 |   |   |
| PKD2      | 4.7   | 1.0 | 6.8   | 1.5 | 1.26E-02 | 5.7   | 1.2  | 3.43E-01 |   |   |
| ALDH4A1   | 8.1   | 1.0 | 11.8  | 1.5 | 5.87E-03 | 10.3  | 1.3  | 1.72E-01 |   |   |
| C22orf46  | 4.1   | 1.0 | 5.9   | 1.5 | 3.54E-03 | 5.4   | 1.3  | 4.33E-01 |   |   |
| PCGF2     | 3.6   | 1.0 | 5.2   | 1.5 | 3.43E-02 | 4.1   | 1.1  | 1.06E-01 |   |   |
| SRXN1     | 2.3   | 1.0 | 3.4   | 1.5 | 2.46E-03 | 2.2   | -1.0 | 1.72E-02 | v | v |
| ZFYVE21   | 13.2  | 1.0 | 19.3  | 1.5 | 6.99E-04 | 15.8  | 1.2  | 2.52E-02 |   |   |
| ASB6      | 1.8   | 1.0 | 2.7   | 1.5 | 1.49E-03 | 2.0   | 1.1  | 1.99E-02 |   |   |
| NCKIPSD   | 6.6   | 1.0 | 9.6   | 1.5 | 1.90E-02 | 11.5  | 1.7  | 1.64E-01 |   |   |
| KDM5B     | 1.9   | 1.0 | 2.8   | 1.5 | 1.79E-03 | 2.3   | 1.2  | 1.35E-01 |   |   |
| ARID5B    | 4.9   | 1.0 | 7.1   | 1.5 | 4.06E-02 | 8.1   | 1.7  | 5.41E-01 |   |   |
| IFRD1     | 5.3   | 1.0 | 7.7   | 1.5 | 2.66E-02 | 6.6   | 1.3  | 1.45E-01 |   |   |
| ZNF263    | 2.5   | 1.0 | 3.7   | 1.5 | 2.57E-04 | 3.7   | 1.5  | 9.64E-01 |   |   |
| MXRA7     | 120.3 | 1.0 | 174.9 | 1.5 | 1.14E-02 | 153.8 | 1.3  | 2.11E-01 |   |   |
| SIRPA     | 5.6   | 1.0 | 8.2   | 1.5 | 2.23E-02 | 5.9   | 1.1  | 1.29E-01 |   |   |
| STYXL1    | 2.2   | 1.0 | 3.2   | 1.5 | 5.89E-03 | 2.8   | 1.3  | 3.47E-01 |   |   |
| VOPP1     | 5.6   | 1.0 | 8.2   | 1.5 | 2.81E-02 | 6.1   | 1.1  | 1.04E-01 |   |   |
| ELMOD3    | 2.7   | 1.0 | 3.9   | 1.5 | 2.21E-03 | 3.2   | 1.2  | 8.82E-02 |   |   |
| HIST1H2AC | 6.2   | 1.0 | 9.0   | 1.5 | 6.04E-03 | 7.7   | 1.2  | 1.61E-01 |   |   |
| CLTCL1    | 1.7   | 1.0 | 2.5   | 1.5 | 8.01E-03 | 2.3   | 1.3  | 3.81E-01 |   |   |
| SIDT2     | 5.3   | 1.0 | 7.7   | 1.5 | 9.20E-03 | 5.9   | 1.1  | 8.59E-02 |   |   |
| MAGED2    | 22.0  | 1.0 | 31.9  | 1.5 | 5.97E-03 | 26.0  | 1.2  | 6.09E-02 |   |   |
| ZNF580    | 1.8   | 1.0 | 2.6   | 1.5 | 1.05E-02 | 2.4   | 1.4  | 7.19E-01 |   |   |
| TRA2A     | 8.2   | 1.0 | 11.9  | 1.4 | 3.64E-04 | 12.8  | 1.6  | 3.65E-01 |   |   |
| PRCP      | 13.4  | 1.0 | 19.4  | 1.4 | 2.63E-02 | 14.0  | 1.0  | 7.95E-02 |   |   |
| CDC42EP1  | 6.3   | 1.0 | 9.1   | 1.4 | 2.77E-02 | 7.6   | 1.2  | 3.70E-01 |   |   |
| PFKL      | 11.4  | 1.0 | 16.5  | 1.4 | 4.56E-03 | 13.4  | 1.2  | 1.20E-01 |   |   |
| RDH11     | 4.6   | 1.0 | 6.6   | 1.4 | 7.77E-04 | 5.0   | 1.1  | 2.02E-02 |   |   |
| DDX3Y     | 7.4   | 1.0 | 10.7  | 1.4 | 1.29E-02 | 9.5   | 1.3  | 1.88E-01 |   |   |
| MAGEH1    | 4.8   | 1.0 | 6.9   | 1.4 | 1.29E-02 | 5.3   | 1.1  | 1.37E-01 |   |   |
| RWDD2A    | 2.0   | 1.0 | 2.9   | 1.4 | 4.55E-03 | 2.1   | 1.1  | 5.45E-02 |   |   |
| FBXO8     | 4.5   | 1.0 | 6.5   | 1.4 | 3.23E-04 | 5.3   | 1.2  | 2.96E-02 |   |   |
| H2AFX     | 1.8   | 1.0 | 2.7   | 1.4 | 1.02E-04 | 2.3   | 1.2  | 1.70E-01 |   |   |
| IFFO1     | 4.8   | 1.0 | 6.9   | 1.4 | 3.50E-02 | 5.2   | 1.1  | 1.03E-01 |   |   |
| PRKAR2B   | 5.9   | 1.0 | 8.5   | 1.4 | 2.08E-02 | 6.8   | 1.2  | 1.24E-01 |   |   |
| PTPRA     | 7.8   | 1.0 | 11.3  | 1.4 | 2.22E-02 | 9.3   | 1.2  | 2.54E-01 |   |   |
| B3GAT3    | 3.7   | 1.0 | 5.3   | 1.4 | 2.23E-02 | 4.7   | 1.3  | 2.62E-01 |   |   |
| CHPF2     | 4.2   | 1.0 | 6.0   | 1.4 | 9.09E-03 | 4.7   | 1.1  | 8.52E-02 |   |   |
| MCL1      | 29.5  | 1.0 | 42.5  | 1.4 | 1.42E-02 | 57.4  | 1.9  | 2.17E-01 |   |   |

|          |      |     |      |     |          |      |      |          |   |   |
|----------|------|-----|------|-----|----------|------|------|----------|---|---|
| MDFC     | 3.4  | 1.0 | 5.0  | 1.4 | 5.96E-03 | 4.3  | 1.2  | 3.10E-01 |   |   |
| ADCY6    | 24.3 | 1.0 | 35.0 | 1.4 | 1.87E-03 | 26.8 | 1.1  | 2.08E-02 |   |   |
| GATA6    | 14.1 | 1.0 | 20.4 | 1.4 | 1.05E-02 | 18.8 | 1.3  | 4.86E-01 |   |   |
| DSE      | 2.5  | 1.0 | 3.7  | 1.4 | 4.79E-02 | 2.9  | 1.1  | 2.39E-01 |   |   |
| C1orf35  | 2.0  | 1.0 | 2.9  | 1.4 | 6.07E-04 | 2.8  | 1.4  | 5.78E-01 |   |   |
| PKD1     | 11.1 | 1.0 | 15.9 | 1.4 | 1.70E-03 | 11.9 | 1.1  | 4.73E-02 | √ | √ |
| HMGNA4   | 6.0  | 1.0 | 8.6  | 1.4 | 3.30E-04 | 6.7  | 1.1  | 3.15E-02 |   |   |
| GRINL1A  | 6.4  | 1.0 | 9.2  | 1.4 | 7.52E-04 | 8.3  | 1.3  | 4.47E-01 |   |   |
| C10orf57 | 2.3  | 1.0 | 3.3  | 1.4 | 2.52E-03 | 2.3  | 1.0  | 4.51E-03 | √ | √ |
| MED17    | 3.3  | 1.0 | 4.7  | 1.4 | 4.41E-08 | 4.3  | 1.3  | 8.69E-02 |   |   |
| FAM69A   | 1.6  | 1.0 | 2.2  | 1.4 | 4.08E-02 | 1.5  | -1.0 | 3.87E-02 | √ | √ |
| AMPD2    | 2.1  | 1.0 | 3.0  | 1.4 | 3.16E-02 | 2.8  | 1.4  | 7.35E-01 |   |   |
| CSTF3    | 3.8  | 1.0 | 5.5  | 1.4 | 2.58E-03 | 4.9  | 1.3  | 3.87E-01 |   |   |
| ZCCHC7   | 1.8  | 1.0 | 2.5  | 1.4 | 3.26E-02 | 2.2  | 1.2  | 4.60E-01 |   |   |
| PPCS     | 10.5 | 1.0 | 15.0 | 1.4 | 9.60E-05 | 11.8 | 1.1  | 3.33E-02 |   |   |
| ARHGEF3  | 3.8  | 1.0 | 5.4  | 1.4 | 9.51E-04 | 4.2  | 1.1  | 1.15E-01 |   |   |
| DUSP26   | 24.9 | 1.0 | 35.7 | 1.4 | 4.10E-04 | 29.2 | 1.2  | 8.56E-03 |   |   |
| RCC2     | 2.5  | 1.0 | 3.6  | 1.4 | 1.75E-03 | 3.3  | 1.3  | 4.35E-01 |   |   |
| CYTH2    | 3.6  | 1.0 | 5.1  | 1.4 | 3.83E-03 | 4.6  | 1.3  | 4.14E-01 |   |   |
| TM7SF3   | 3.2  | 1.0 | 4.6  | 1.4 | 4.60E-03 | 3.6  | 1.1  | 8.17E-02 |   |   |
| CSRNP2   | 4.1  | 1.0 | 5.9  | 1.4 | 4.88E-05 | 5.3  | 1.3  | 6.83E-02 |   |   |
| LPXN     | 1.5  | 1.0 | 2.1  | 1.4 | 3.63E-02 | 1.9  | 1.3  | 3.71E-01 |   |   |
| ARHGAP17 | 8.9  | 1.0 | 12.7 | 1.4 | 6.11E-06 | 12.6 | 1.4  | 9.24E-01 |   |   |
| SLC1A4   | 2.1  | 1.0 | 3.0  | 1.4 | 4.55E-02 | 2.1  | -1.0 | 1.50E-02 | √ | √ |
| ING4     | 6.2  | 1.0 | 8.8  | 1.4 | 6.21E-03 | 8.1  | 1.3  | 2.71E-01 |   |   |
| MAPK12   | 3.5  | 1.0 | 5.0  | 1.4 | 3.30E-02 | 4.5  | 1.3  | 3.60E-01 |   |   |
| ITGB5    | 19.0 | 1.0 | 27.2 | 1.4 | 4.39E-02 | 19.8 | 1.0  | 1.48E-01 |   |   |
| WBP1     | 14.1 | 1.0 | 20.1 | 1.4 | 4.18E-03 | 19.2 | 1.4  | 3.99E-01 |   |   |
| TRAPPC6A | 2.9  | 1.0 | 4.1  | 1.4 | 1.18E-02 | 3.9  | 1.4  | 5.11E-01 |   |   |
| SLC3A2   | 7.2  | 1.0 | 10.2 | 1.4 | 3.65E-02 | 8.8  | 1.2  | 2.83E-01 |   |   |
| LETMD1   | 4.8  | 1.0 | 6.8  | 1.4 | 2.22E-02 | 5.8  | 1.2  | 1.36E-01 |   |   |
| C17orf59 | 2.8  | 1.0 | 4.0  | 1.4 | 2.94E-03 | 2.9  | 1.0  | 2.65E-03 | √ | √ |
| CLIP2    | 1.8  | 1.0 | 2.6  | 1.4 | 4.24E-02 | 2.2  | 1.2  | 4.01E-01 |   |   |
| DNAJB1   | 11.3 | 1.0 | 16.1 | 1.4 | 1.84E-03 | 20.0 | 1.8  | 3.62E-01 |   |   |
| C2CD2L   | 2.3  | 1.0 | 3.3  | 1.4 | 2.82E-06 | 2.4  | 1.0  | 1.51E-03 | √ | √ |
| RECK     | 1.8  | 1.0 | 2.6  | 1.4 | 2.59E-02 | 2.3  | 1.2  | 5.23E-01 |   |   |
| C10orf71 | 18.2 | 1.0 | 25.9 | 1.4 | 2.31E-03 | 23.4 | 1.3  | 4.07E-01 |   |   |
| USP20    | 2.8  | 1.0 | 3.9  | 1.4 | 4.54E-04 | 3.7  | 1.4  | 5.85E-01 |   |   |
| ARMC10   | 4.4  | 1.0 | 6.2  | 1.4 | 4.42E-04 | 5.2  | 1.2  | 6.71E-02 |   |   |
| C16orf62 | 4.4  | 1.0 | 6.3  | 1.4 | 8.50E-05 | 5.4  | 1.2  | 1.07E-01 |   |   |
| BTG3     | 2.0  | 1.0 | 2.8  | 1.4 | 3.40E-02 | 3.5  | 1.8  | 4.09E-01 |   |   |
| CHMP5    | 13.4 | 1.0 | 19.0 | 1.4 | 2.28E-04 | 16.5 | 1.2  | 2.17E-01 |   |   |
| PPAPDC1B | 2.4  | 1.0 | 3.4  | 1.4 | 1.59E-02 | 3.2  | 1.3  | 6.73E-01 |   |   |
| PAPSS1   | 3.1  | 1.0 | 4.5  | 1.4 | 8.19E-03 | 3.9  | 1.2  | 3.78E-01 |   |   |
| PLCD1    | 2.4  | 1.0 | 3.3  | 1.4 | 2.09E-02 | 2.4  | 1.0  | 5.12E-02 |   |   |
| NAAA     | 3.0  | 1.0 | 4.3  | 1.4 | 6.49E-03 | 3.2  | 1.0  | 9.60E-03 | √ | √ |
| MYLIP    | 3.8  | 1.0 | 5.4  | 1.4 | 4.85E-02 | 5.2  | 1.4  | 7.66E-01 |   |   |
| MAN1B1   | 6.4  | 1.0 | 9.1  | 1.4 | 3.00E-03 | 7.7  | 1.2  | 1.09E-01 |   |   |
| TTC5     | 1.7  | 1.0 | 2.4  | 1.4 | 3.00E-03 | 2.3  | 1.3  | 4.75E-01 |   |   |
| VASH1    | 4.5  | 1.0 | 6.3  | 1.4 | 4.91E-02 | 5.0  | 1.1  | 2.28E-01 |   |   |
| UNC45A   | 5.0  | 1.0 | 7.0  | 1.4 | 1.11E-03 | 6.0  | 1.2  | 9.08E-02 |   |   |
| PDE3B    | 1.7  | 1.0 | 2.5  | 1.4 | 3.87E-03 | 1.7  | 1.0  | 7.28E-03 | √ | √ |
| ZDHHC14  | 2.4  | 1.0 | 3.4  | 1.4 | 1.77E-02 | 4.3  | 1.8  | 1.91E-01 |   |   |
| USP22    | 19.9 | 1.0 | 28.2 | 1.4 | 4.29E-07 | 22.6 | 1.1  | 3.42E-02 |   |   |
| PHF15    | 3.3  | 1.0 | 4.7  | 1.4 | 3.24E-03 | 3.3  | -1.0 | 3.72E-02 | √ | √ |
| SNRK     | 5.5  | 1.0 | 7.8  | 1.4 | 3.53E-02 | 6.3  | 1.1  | 1.42E-01 |   |   |
| KLHL12   | 5.5  | 1.0 | 7.8  | 1.4 | 2.80E-05 | 6.8  | 1.2  | 6.52E-02 |   |   |
| DPM2     | 2.9  | 1.0 | 4.1  | 1.4 | 3.12E-02 | 4.2  | 1.4  | 8.70E-01 |   |   |
| KIF13A   | 15.9 | 1.0 | 22.5 | 1.4 | 1.32E-02 | 18.4 | 1.2  | 7.46E-02 |   |   |
| TXNRD1   | 16.5 | 1.0 | 23.4 | 1.4 | 1.90E-02 | 19.5 | 1.2  | 3.19E-01 |   |   |
| GLS      | 4.9  | 1.0 | 6.9  | 1.4 | 2.34E-03 | 5.0  | 1.0  | 4.17E-02 | √ | √ |
| ANKH     | 11.8 | 1.0 | 16.7 | 1.4 | 1.39E-03 | 14.5 | 1.2  | 5.70E-02 |   |   |
| MGAT2    | 3.4  | 1.0 | 4.7  | 1.4 | 7.99E-04 | 3.7  | 1.1  | 4.21E-02 |   |   |
| SCARB1   | 2.8  | 1.0 | 3.9  | 1.4 | 1.82E-02 | 2.7  | -1.0 | 5.08E-02 |   |   |
| FILIP1L  | 17.5 | 1.0 | 24.7 | 1.4 | 3.27E-02 | 22.9 | 1.3  | 4.97E-01 |   |   |
| TDRD7    | 2.2  | 1.0 | 3.2  | 1.4 | 3.32E-03 | 2.3  | 1.0  | 1.12E-02 | √ | √ |
| FRMD8    | 2.3  | 1.0 | 3.2  | 1.4 | 8.32E-03 | 3.7  | 1.6  | 1.44E-01 |   |   |
| GPRC5C   | 5.1  | 1.0 | 7.2  | 1.4 | 2.01E-03 | 5.3  | 1.0  | 1.72E-03 | √ | √ |
| DNAJB4   | 17.7 | 1.0 | 24.9 | 1.4 | 3.28E-03 | 19.4 | 1.1  | 5.73E-02 |   |   |
| PDGFC    | 2.5  | 1.0 | 3.5  | 1.4 | 2.21E-03 | 2.8  | 1.1  | 1.40E-01 |   |   |
| ZMAT1    | 3.4  | 1.0 | 4.7  | 1.4 | 1.89E-03 | 5.0  | 1.5  | 6.65E-01 |   |   |
| TSSC1    | 2.9  | 1.0 | 4.1  | 1.4 | 1.49E-02 | 3.5  | 1.2  | 2.30E-01 |   |   |
| TUT1     | 2.7  | 1.0 | 3.9  | 1.4 | 3.76E-04 | 3.7  | 1.3  | 5.00E-01 |   |   |
| LEPRE1   | 2.5  | 1.0 | 3.5  | 1.4 | 2.91E-02 | 3.3  | 1.4  | 8.21E-01 |   |   |
| NEK3     | 2.0  | 1.0 | 2.8  | 1.4 | 1.46E-02 | 2.2  | 1.1  | 2.46E-02 |   |   |
| TMEM9    | 6.4  | 1.0 | 9.0  | 1.4 | 1.95E-02 | 7.0  | 1.1  | 8.48E-02 |   |   |
| FZD1     | 4.7  | 1.0 | 6.6  | 1.4 | 3.44E-02 | 5.4  | 1.2  | 1.25E-01 |   |   |
| UTP3     | 4.6  | 1.0 | 6.4  | 1.4 | 1.27E-04 | 5.4  | 1.2  | 1.77E-01 |   |   |
| NEIL2    | 2.6  | 1.0 | 3.7  | 1.4 | 1.58E-02 | 3.0  | 1.1  | 1.14E-01 |   |   |
| ZNF259   | 5.3  | 1.0 | 7.5  | 1.4 | 2.14E-03 | 7.0  | 1.3  | 4.64E-01 |   |   |
| DHRS1    | 2.2  | 1.0 | 3.1  | 1.4 | 9.54E-03 | 2.9  | 1.3  | 6.29E-01 |   |   |
| SH3BGR   | 37.0 | 1.0 | 52.0 | 1.4 | 2.16E-02 | 56.1 | 1.5  | 7.19E-01 |   |   |
| C19orf25 | 2.4  | 1.0 | 3.4  | 1.4 | 4.89E-04 | 3.2  | 1.3  | 5.25E-01 |   |   |

|           |       |     |       |     |          |       |      |          |   |   |
|-----------|-------|-----|-------|-----|----------|-------|------|----------|---|---|
| SMS       | 13.1  | 1.0 | 18.5  | 1.4 | 1.20E-03 | 15.0  | 1.1  | 3.26E-02 |   |   |
| GPRASP2   | 3.0   | 1.0 | 4.3   | 1.4 | 3.60E-03 | 3.3   | 1.1  | 2.62E-03 |   |   |
| TMED9     | 21.2  | 1.0 | 29.8  | 1.4 | 2.31E-04 | 24.0  | 1.1  | 2.45E-02 |   |   |
| PPID      | 10.3  | 1.0 | 14.5  | 1.4 | 8.68E-05 | 11.6  | 1.1  | 5.66E-02 |   |   |
| C5orf32   | 26.0  | 1.0 | 36.5  | 1.4 | 1.35E-02 | 32.5  | 1.3  | 2.65E-01 |   |   |
| BDH2      | 4.2   | 1.0 | 5.9   | 1.4 | 1.18E-02 | 5.5   | 1.3  | 5.76E-01 |   |   |
| YPEL1     | 1.9   | 1.0 | 2.6   | 1.4 | 1.38E-02 | 2.5   | 1.4  | 7.88E-01 |   |   |
| HSP90AB1  | 177.8 | 1.0 | 249.6 | 1.4 | 4.56E-04 | 217.1 | 1.2  | 2.00E-01 |   |   |
| IRF2      | 5.0   | 1.0 | 7.0   | 1.4 | 4.30E-04 | 5.3   | 1.1  | 8.61E-03 |   |   |
| CDK10     | 5.2   | 1.0 | 7.2   | 1.4 | 2.29E-03 | 7.1   | 1.4  | 8.17E-01 |   |   |
| TRUB1     | 3.7   | 1.0 | 5.2   | 1.4 | 2.66E-03 | 5.5   | 1.5  | 5.92E-01 |   |   |
| TXNDC5    | 13.3  | 1.0 | 18.7  | 1.4 | 2.27E-02 | 14.7  | 1.1  | 2.45E-01 |   |   |
| SRSF9     | 6.2   | 1.0 | 8.6   | 1.4 | 1.16E-02 | 7.4   | 1.2  | 2.57E-01 |   |   |
| SS18L2    | 1.5   | 1.0 | 2.0   | 1.4 | 5.03E-04 | 1.9   | 1.3  | 6.01E-01 |   |   |
| GTF2B     | 3.9   | 1.0 | 5.4   | 1.4 | 1.31E-04 | 5.2   | 1.4  | 7.44E-01 |   |   |
| HIVEP2    | 3.1   | 1.0 | 4.4   | 1.4 | 1.91E-02 | 3.2   | 1.0  | 1.62E-02 | v | v |
| DDX50     | 5.6   | 1.0 | 7.8   | 1.4 | 5.03E-04 | 6.5   | 1.2  | 8.87E-02 |   |   |
| C11orf24  | 7.1   | 1.0 | 9.9   | 1.4 | 3.22E-02 | 8.6   | 1.2  | 3.73E-01 |   |   |
| C6orf70   | 2.3   | 1.0 | 3.3   | 1.4 | 7.27E-03 | 3.0   | 1.3  | 2.94E-01 |   |   |
| TRIM45    | 3.0   | 1.0 | 4.2   | 1.4 | 1.53E-02 | 3.9   | 1.3  | 5.25E-01 |   |   |
| IFIT5     | 2.2   | 1.0 | 3.1   | 1.4 | 4.22E-02 | 2.3   | 1.1  | 1.36E-01 |   |   |
| ZFYVE27   | 3.5   | 1.0 | 4.9   | 1.4 | 1.90E-03 | 4.9   | 1.4  | 9.52E-01 |   |   |
| SCAND1    | 8.7   | 1.0 | 12.1  | 1.4 | 1.46E-02 | 11.3  | 1.3  | 2.04E-01 |   |   |
| MAP7D3    | 4.0   | 1.0 | 5.5   | 1.4 | 9.30E-04 | 4.4   | 1.1  | 4.89E-02 |   |   |
| ABHD11    | 3.9   | 1.0 | 5.5   | 1.4 | 2.97E-03 | 5.0   | 1.3  | 4.68E-01 |   |   |
| TMEM208   | 3.4   | 1.0 | 4.8   | 1.4 | 2.03E-02 | 4.3   | 1.3  | 3.53E-01 |   |   |
| PTP4A1    | 5.9   | 1.0 | 8.2   | 1.4 | 2.56E-02 | 8.9   | 1.5  | 6.03E-01 |   |   |
| PTPN21    | 6.5   | 1.0 | 9.0   | 1.4 | 4.38E-03 | 7.4   | 1.1  | 2.10E-01 |   |   |
| KLHDC4    | 2.1   | 1.0 | 2.9   | 1.4 | 5.05E-03 | 2.5   | 1.2  | 1.50E-01 |   |   |
| TBL1X     | 2.2   | 1.0 | 3.0   | 1.4 | 2.05E-02 | 2.5   | 1.2  | 1.97E-01 |   |   |
| OTUD5     | 7.7   | 1.0 | 10.8  | 1.4 | 7.40E-03 | 10.1  | 1.3  | 4.92E-01 |   |   |
| HIRA      | 4.2   | 1.0 | 5.8   | 1.4 | 2.87E-05 | 4.7   | 1.1  | 3.34E-02 |   |   |
| PCSK5     | 1.1   | 1.0 | 1.6   | 1.4 | 8.67E-03 | 1.1   | -1.0 | 6.50E-02 |   |   |
| SIRT7     | 1.7   | 1.0 | 2.4   | 1.4 | 5.82E-03 | 2.4   | 1.4  | 8.93E-01 |   |   |
| ANAPC10   | 3.2   | 1.0 | 4.5   | 1.4 | 2.07E-03 | 4.0   | 1.2  | 4.00E-01 |   |   |
| ACTR6     | 4.6   | 1.0 | 6.4   | 1.4 | 1.03E-07 | 5.0   | 1.1  | 4.06E-03 |   |   |
| CBY1      | 13.4  | 1.0 | 18.7  | 1.4 | 1.75E-04 | 17.1  | 1.3  | 2.58E-01 |   |   |
| NPRL3     | 4.5   | 1.0 | 6.2   | 1.4 | 4.56E-03 | 5.5   | 1.2  | 1.47E-01 |   |   |
| CRELD1    | 15.5  | 1.0 | 21.5  | 1.4 | 7.71E-04 | 17.2  | 1.1  | 1.54E-02 |   |   |
| SEPT2     | 44.1  | 1.0 | 61.4  | 1.4 | 6.57E-03 | 53.0  | 1.2  | 7.87E-02 |   |   |
| GRB10     | 6.5   | 1.0 | 9.0   | 1.4 | 5.33E-04 | 8.4   | 1.3  | 3.53E-01 |   |   |
| C6orf62   | 12.3  | 1.0 | 17.1  | 1.4 | 6.92E-03 | 13.5  | 1.1  | 1.32E-02 |   |   |
| LMNA      | 48.7  | 1.0 | 67.7  | 1.4 | 6.94E-03 | 51.6  | 1.1  | 5.79E-02 |   |   |
| ARAP3     | 4.1   | 1.0 | 5.6   | 1.4 | 2.29E-03 | 5.4   | 1.3  | 6.68E-01 |   |   |
| ARMCX2    | 5.1   | 1.0 | 7.1   | 1.4 | 4.36E-03 | 5.9   | 1.1  | 6.01E-02 |   |   |
| C20orf3   | 9.6   | 1.0 | 13.4  | 1.4 | 1.40E-04 | 10.7  | 1.1  | 2.52E-02 |   |   |
| FANCL     | 1.9   | 1.0 | 2.6   | 1.4 | 5.96E-03 | 2.4   | 1.3  | 4.02E-01 |   |   |
| AGPAT1    | 15.0  | 1.0 | 20.9  | 1.4 | 1.23E-04 | 16.8  | 1.1  | 2.75E-02 |   |   |
| SLC23A2   | 2.2   | 1.0 | 3.1   | 1.4 | 2.72E-02 | 2.7   | 1.2  | 3.90E-01 |   |   |
| XPR1      | 9.2   | 1.0 | 12.8  | 1.4 | 2.54E-02 | 11.1  | 1.2  | 3.55E-01 |   |   |
| LMAN2L    | 5.3   | 1.0 | 7.3   | 1.4 | 3.53E-04 | 6.4   | 1.2  | 1.29E-01 |   |   |
| PTPLAD1   | 2.5   | 1.0 | 3.5   | 1.4 | 3.27E-02 | 2.6   | 1.0  | 7.32E-02 |   |   |
| PPP1R9B   | 5.5   | 1.0 | 7.7   | 1.4 | 3.89E-02 | 5.5   | 1.0  | 5.92E-02 |   |   |
| CLK1      | 21.7  | 1.0 | 30.1  | 1.4 | 8.85E-03 | 37.1  | 1.7  | 2.19E-01 |   |   |
| C7orf58   | 4.0   | 1.0 | 5.6   | 1.4 | 2.46E-02 | 4.8   | 1.2  | 3.96E-01 |   |   |
| PIGQ      | 3.7   | 1.0 | 5.2   | 1.4 | 3.87E-03 | 4.4   | 1.2  | 7.69E-02 |   |   |
| KCTD13    | 1.9   | 1.0 | 2.6   | 1.4 | 1.53E-03 | 2.8   | 1.4  | 6.07E-01 |   |   |
| SYT11     | 3.8   | 1.0 | 5.2   | 1.4 | 2.63E-02 | 3.7   | -1.0 | 7.18E-02 |   |   |
| MYCBP     | 1.8   | 1.0 | 2.5   | 1.4 | 2.14E-02 | 2.1   | 1.2  | 2.54E-01 |   |   |
| KAT2A     | 8.9   | 1.0 | 12.4  | 1.4 | 1.54E-02 | 11.9  | 1.3  | 6.14E-01 |   |   |
| C17orf103 | 3.6   | 1.0 | 5.0   | 1.4 | 6.53E-04 | 3.9   | 1.1  | 2.34E-02 |   |   |
| GBA       | 4.9   | 1.0 | 6.8   | 1.4 | 3.62E-02 | 5.7   | 1.2  | 3.08E-01 |   |   |
| CCDC159   | 4.6   | 1.0 | 6.3   | 1.4 | 7.42E-04 | 5.8   | 1.3  | 1.77E-01 |   |   |
| GALNTL4   | 5.3   | 1.0 | 7.4   | 1.4 | 8.20E-05 | 6.2   | 1.2  | 2.22E-02 |   |   |
| CDC14B    | 4.3   | 1.0 | 5.9   | 1.4 | 2.41E-03 | 4.6   | 1.1  | 1.78E-02 |   |   |
| TRIM26    | 3.9   | 1.0 | 5.4   | 1.4 | 2.32E-03 | 4.7   | 1.2  | 2.32E-01 |   |   |
| PDCD6     | 10.9  | 1.0 | 15.0  | 1.4 | 3.12E-03 | 13.7  | 1.3  | 3.10E-01 |   |   |
| SGSH      | 2.9   | 1.0 | 4.0   | 1.4 | 2.75E-02 | 3.3   | 1.2  | 2.11E-01 |   |   |
| KDSR      | 2.9   | 1.0 | 4.0   | 1.4 | 2.86E-03 | 3.3   | 1.1  | 5.93E-02 |   |   |
| ADAMTSL5  | 4.8   | 1.0 | 6.6   | 1.4 | 4.58E-02 | 7.3   | 1.5  | 4.58E-01 |   |   |
| TRADD     | 1.8   | 1.0 | 2.5   | 1.4 | 3.03E-02 | 2.5   | 1.4  | 9.63E-01 |   |   |
| TSPYL1    | 9.9   | 1.0 | 13.6  | 1.4 | 7.99E-05 | 11.6  | 1.2  | 2.84E-02 |   |   |
| NSMCE1    | 9.6   | 1.0 | 13.3  | 1.4 | 4.82E-03 | 11.2  | 1.2  | 2.87E-02 |   |   |
| RAB2B     | 2.9   | 1.0 | 4.0   | 1.4 | 3.59E-03 | 4.1   | 1.4  | 9.27E-01 |   |   |
| ZBTB22    | 3.8   | 1.0 | 5.2   | 1.4 | 7.87E-03 | 4.2   | 1.1  | 1.09E-01 |   |   |
| NME3      | 6.3   | 1.0 | 8.7   | 1.4 | 3.04E-02 | 7.3   | 1.2  | 1.57E-01 |   |   |
| ANXA5     | 55.6  | 1.0 | 76.7  | 1.4 | 4.56E-02 | 71.0  | 1.3  | 6.70E-01 |   |   |
| TSEN34    | 3.4   | 1.0 | 4.7   | 1.4 | 1.54E-02 | 4.3   | 1.3  | 4.49E-01 |   |   |
| DNAJA1    | 26.3  | 1.0 | 36.2  | 1.4 | 9.17E-03 | 33.3  | 1.3  | 5.18E-01 |   |   |
| SVIL      | 69.1  | 1.0 | 95.3  | 1.4 | 2.68E-03 | 84.5  | 1.2  | 2.68E-01 |   |   |
| CDKN2AIP  | 3.1   | 1.0 | 4.3   | 1.4 | 1.79E-03 | 3.2   | 1.0  | 7.52E-03 | v | v |
| MNAT1     | 4.8   | 1.0 | 6.6   | 1.4 | 1.10E-04 | 5.7   | 1.2  | 4.56E-02 |   |   |
| ZRSR2     | 3.6   | 1.0 | 4.9   | 1.4 | 1.28E-02 | 4.6   | 1.3  | 4.47E-01 |   |   |
| WWTR1     | 7.4   | 1.0 | 10.2  | 1.4 | 5.88E-03 | 7.9   | 1.1  | 3.12E-02 |   |   |

|            |       |     |       |     |          |       |      |          |   |   |
|------------|-------|-----|-------|-----|----------|-------|------|----------|---|---|
| NFASC      | 3.3   | 1.0 | 4.5   | 1.4 | 3.14E-02 | 4.5   | 1.4  | 9.04E-01 |   |   |
| SAMD4B     | 6.3   | 1.0 | 8.7   | 1.4 | 2.02E-03 | 7.4   | 1.2  | 1.75E-01 |   |   |
| RAB20      | 3.5   | 1.0 | 4.9   | 1.4 | 2.25E-02 | 6.8   | 1.9  | 1.14E-01 |   |   |
| SLC16A3    | 2.0   | 1.0 | 2.8   | 1.4 | 2.00E-02 | 2.0   | 1.0  | 1.27E-01 |   |   |
| JOSD1      | 5.8   | 1.0 | 8.0   | 1.4 | 5.99E-03 | 7.3   | 1.3  | 3.74E-01 |   |   |
| DDX39B     | 36.2  | 1.0 | 49.8  | 1.4 | 6.91E-06 | 50.6  | 1.4  | 8.09E-01 |   |   |
| INSIG1     | 2.8   | 1.0 | 3.9   | 1.4 | 1.36E-02 | 4.0   | 1.4  | 8.02E-01 |   |   |
| PLCG1      | 9.9   | 1.0 | 13.7  | 1.4 | 4.35E-03 | 13.1  | 1.3  | 7.05E-01 |   |   |
| ERCC5      | 2.8   | 1.0 | 3.8   | 1.4 | 4.80E-02 | 3.7   | 1.3  | 8.17E-01 |   |   |
| NUP188     | 3.8   | 1.0 | 5.2   | 1.4 | 7.27E-03 | 5.2   | 1.4  | 9.54E-01 |   |   |
| RAB11FIP3  | 7.4   | 1.0 | 10.2  | 1.4 | 4.68E-03 | 9.1   | 1.2  | 2.02E-01 |   |   |
| CLUAP1     | 4.4   | 1.0 | 6.1   | 1.4 | 1.28E-03 | 4.6   | 1.0  | 4.46E-03 | v | v |
| TMEM39B    | 1.7   | 1.0 | 2.3   | 1.4 | 3.94E-02 | 2.0   | 1.2  | 3.13E-01 |   |   |
| FAM120AOS  | 2.8   | 1.0 | 3.8   | 1.4 | 3.84E-04 | 3.0   | 1.1  | 5.61E-02 |   |   |
| CWC22      | 2.8   | 1.0 | 3.9   | 1.4 | 1.60E-03 | 3.5   | 1.2  | 2.12E-01 |   |   |
| GABPB2     | 2.1   | 1.0 | 2.9   | 1.4 | 1.08E-04 | 2.3   | 1.1  | 3.34E-02 |   |   |
| PES1       | 4.4   | 1.0 | 6.0   | 1.4 | 2.50E-02 | 5.8   | 1.3  | 8.35E-01 |   |   |
| POGZ       | 7.9   | 1.0 | 10.8  | 1.4 | 8.75E-04 | 9.5   | 1.2  | 1.00E-01 |   |   |
| MBIP       | 3.2   | 1.0 | 4.4   | 1.4 | 9.70E-03 | 3.7   | 1.1  | 1.46E-01 |   |   |
| PELP1      | 4.8   | 1.0 | 6.6   | 1.4 | 1.30E-03 | 6.4   | 1.3  | 6.29E-01 |   |   |
| PYGO2      | 3.7   | 1.0 | 5.0   | 1.4 | 2.28E-02 | 4.3   | 1.2  | 1.71E-01 |   |   |
| BTBD10     | 4.8   | 1.0 | 6.6   | 1.4 | 2.95E-04 | 5.7   | 1.2  | 2.38E-01 |   |   |
| NDN        | 6.8   | 1.0 | 9.4   | 1.4 | 1.48E-02 | 8.9   | 1.3  | 4.53E-01 |   |   |
| DYNC1L12   | 16.8  | 1.0 | 23.1  | 1.4 | 1.80E-03 | 19.7  | 1.2  | 1.50E-01 |   |   |
| GPR137     | 4.0   | 1.0 | 5.5   | 1.4 | 6.11E-03 | 4.2   | 1.1  | 5.84E-02 |   |   |
| FLYWCH1    | 5.0   | 1.0 | 6.8   | 1.4 | 1.49E-02 | 5.5   | 1.1  | 2.39E-02 |   |   |
| UBAC2      | 7.5   | 1.0 | 10.2  | 1.4 | 1.56E-03 | 9.4   | 1.3  | 4.67E-01 |   |   |
| EFNA5      | 2.2   | 1.0 | 3.0   | 1.4 | 3.14E-02 | 2.9   | 1.3  | 8.77E-01 |   |   |
| C7orf43    | 1.9   | 1.0 | 2.7   | 1.4 | 3.64E-02 | 2.3   | 1.2  | 1.30E-01 |   |   |
| TMEM87A    | 5.9   | 1.0 | 8.0   | 1.4 | 1.72E-02 | 7.0   | 1.2  | 3.50E-01 |   |   |
| BTD        | 2.0   | 1.0 | 2.8   | 1.4 | 2.01E-02 | 2.5   | 1.2  | 3.89E-01 |   |   |
| RBM4B      | 3.3   | 1.0 | 4.5   | 1.4 | 3.79E-03 | 3.7   | 1.1  | 1.46E-01 |   |   |
| TMEM8B     | 3.5   | 1.0 | 4.8   | 1.4 | 1.13E-04 | 4.0   | 1.1  | 1.34E-02 |   |   |
| FAM122B    | 4.2   | 1.0 | 5.7   | 1.4 | 2.76E-06 | 4.8   | 1.1  | 1.35E-02 |   |   |
| GNPDA1     | 5.3   | 1.0 | 7.2   | 1.4 | 1.65E-03 | 5.9   | 1.1  | 3.92E-02 |   |   |
| KDM5D      | 6.3   | 1.0 | 8.6   | 1.4 | 4.42E-02 | 7.8   | 1.2  | 2.05E-01 |   |   |
| DNAL4      | 2.8   | 1.0 | 3.8   | 1.4 | 9.44E-03 | 3.5   | 1.2  | 5.22E-01 |   |   |
| UBB        | 363.8 | 1.0 | 497.0 | 1.4 | 2.32E-05 | 447.8 | 1.2  | 2.38E-01 |   |   |
| MEF2D      | 12.0  | 1.0 | 16.4  | 1.4 | 4.72E-05 | 13.7  | 1.1  | 1.85E-02 |   |   |
| INO80E     | 6.7   | 1.0 | 9.2   | 1.4 | 1.22E-02 | 9.5   | 1.4  | 7.80E-01 |   |   |
| EIF6       | 10.8  | 1.0 | 14.7  | 1.4 | 6.57E-03 | 13.9  | 1.3  | 5.09E-01 |   |   |
| DUSP16     | 2.4   | 1.0 | 3.3   | 1.4 | 3.49E-04 | 2.7   | 1.1  | 1.29E-01 |   |   |
| DPM1       | 15.0  | 1.0 | 20.4  | 1.4 | 8.54E-04 | 18.8  | 1.3  | 3.86E-01 |   |   |
| UTP18      | 2.0   | 1.0 | 2.8   | 1.4 | 8.64E-03 | 2.5   | 1.2  | 4.16E-01 |   |   |
| YIPF2      | 4.1   | 1.0 | 5.6   | 1.4 | 3.17E-02 | 5.3   | 1.3  | 6.14E-01 |   |   |
| FUS        | 9.5   | 1.0 | 13.0  | 1.4 | 1.23E-03 | 12.1  | 1.3  | 2.75E-01 |   |   |
| PTCD2      | 3.4   | 1.0 | 4.6   | 1.4 | 2.05E-02 | 3.5   | 1.0  | 2.65E-02 |   |   |
| MBOAT7     | 2.3   | 1.0 | 3.2   | 1.4 | 3.66E-02 | 2.7   | 1.2  | 2.88E-01 |   |   |
| HMGN1      | 17.2  | 1.0 | 23.5  | 1.4 | 2.61E-03 | 21.9  | 1.3  | 5.15E-01 |   |   |
| PLEKHA2    | 5.2   | 1.0 | 7.1   | 1.4 | 2.02E-02 | 6.0   | 1.2  | 1.84E-01 |   |   |
| SBNO2      | 3.0   | 1.0 | 4.1   | 1.4 | 2.82E-02 | 4.0   | 1.3  | 8.92E-01 |   |   |
| MNT        | 1.7   | 1.0 | 2.4   | 1.4 | 1.60E-02 | 1.7   | -1.0 | 3.27E-02 | v | v |
| ARL16      | 3.2   | 1.0 | 4.3   | 1.4 | 3.18E-03 | 3.4   | 1.1  | 1.12E-02 |   |   |
| POFUT2     | 3.8   | 1.0 | 5.1   | 1.4 | 2.90E-04 | 5.1   | 1.4  | 9.41E-01 |   |   |
| TMEM90B    | 6.8   | 1.0 | 9.2   | 1.4 | 2.07E-02 | 8.0   | 1.2  | 1.72E-01 |   |   |
| INTS3      | 10.6  | 1.0 | 14.4  | 1.4 | 1.89E-03 | 13.6  | 1.3  | 3.95E-01 |   |   |
| SPR        | 11.9  | 1.0 | 16.2  | 1.4 | 2.07E-03 | 12.4  | 1.0  | 1.71E-02 |   |   |
| C17orf28   | 2.6   | 1.0 | 3.6   | 1.4 | 3.85E-02 | 3.7   | 1.4  | 7.29E-01 |   |   |
| SLC25A1    | 4.9   | 1.0 | 6.7   | 1.4 | 1.79E-02 | 5.7   | 1.2  | 9.75E-02 |   |   |
| CCNL2      | 19.7  | 1.0 | 26.9  | 1.4 | 3.04E-03 | 25.1  | 1.3  | 2.68E-01 |   |   |
| TDP2       | 7.5   | 1.0 | 10.2  | 1.4 | 1.63E-04 | 7.9   | 1.1  | 8.41E-03 |   |   |
| ZMAT2      | 10.1  | 1.0 | 13.7  | 1.4 | 7.78E-04 | 11.9  | 1.2  | 1.23E-01 |   |   |
| RAB11FIP5  | 4.3   | 1.0 | 5.9   | 1.4 | 3.36E-03 | 5.0   | 1.2  | 2.41E-01 |   |   |
| GABARAPL1  | 115.2 | 1.0 | 156.8 | 1.4 | 1.22E-02 | 132.5 | 1.2  | 1.60E-01 |   |   |
| PLXNB2     | 9.0   | 1.0 | 12.2  | 1.4 | 3.63E-02 | 9.8   | 1.1  | 1.77E-01 |   |   |
| PI4K2A     | 4.3   | 1.0 | 5.9   | 1.4 | 2.64E-05 | 5.3   | 1.2  | 2.10E-01 |   |   |
| PPP4C      | 9.1   | 1.0 | 12.4  | 1.4 | 2.07E-05 | 11.1  | 1.2  | 1.95E-01 |   |   |
| LPCAT1     | 2.8   | 1.0 | 3.9   | 1.4 | 4.59E-02 | 2.9   | 1.0  | 1.10E-01 |   |   |
| ATP8B1     | 1.5   | 1.0 | 2.1   | 1.4 | 4.95E-02 | 1.7   | 1.1  | 3.47E-01 |   |   |
| C11orf49   | 4.0   | 1.0 | 5.5   | 1.4 | 5.49E-03 | 4.8   | 1.2  | 1.74E-01 |   |   |
| ALDH1B1    | 2.3   | 1.0 | 3.2   | 1.4 | 2.18E-02 | 2.9   | 1.2  | 3.85E-01 |   |   |
| FBXL12     | 2.3   | 1.0 | 3.2   | 1.4 | 3.94E-03 | 3.6   | 1.5  | 1.16E-01 |   |   |
| C5orf4     | 9.6   | 1.0 | 13.0  | 1.4 | 4.90E-02 | 10.9  | 1.1  | 2.74E-01 |   |   |
| CSGALNACT2 | 3.0   | 1.0 | 4.1   | 1.4 | 2.23E-03 | 3.7   | 1.3  | 5.03E-01 |   |   |
| RNF146     | 14.5  | 1.0 | 19.7  | 1.4 | 2.92E-03 | 22.0  | 1.5  | 3.83E-01 |   |   |
| KIAA0930   | 2.1   | 1.0 | 2.9   | 1.4 | 4.22E-02 | 2.1   | -1.0 | 1.21E-01 |   |   |
| SGSM2      | 6.4   | 1.0 | 8.7   | 1.4 | 9.47E-04 | 7.9   | 1.2  | 1.29E-01 |   |   |
| LOC440104  | 2.3   | 1.0 | 3.2   | 1.4 | 2.53E-02 | 3.2   | 1.4  | 9.97E-01 |   |   |
| CRYZ       | 8.3   | 1.0 | 11.3  | 1.4 | 3.11E-02 | 12.0  | 1.4  | 5.52E-01 |   |   |
| KCTD6      | 2.4   | 1.0 | 3.2   | 1.4 | 1.37E-02 | 2.9   | 1.2  | 2.40E-01 |   |   |
| ARVCF      | 3.5   | 1.0 | 4.7   | 1.4 | 4.20E-02 | 4.8   | 1.4  | 8.92E-01 |   |   |
| HAUS7      | 2.8   | 1.0 | 3.8   | 1.4 | 2.10E-02 | 3.1   | 1.1  | 1.54E-01 |   |   |
| BPHL       | 3.3   | 1.0 | 4.5   | 1.4 | 2.52E-02 | 3.6   | 1.1  | 1.06E-01 |   |   |
| ASCC2      | 7.9   | 1.0 | 10.7  | 1.4 | 2.34E-03 | 9.7   | 1.2  | 1.10E-01 |   |   |

|            |       |     |       |     |          |       |      |          |   |   |
|------------|-------|-----|-------|-----|----------|-------|------|----------|---|---|
| ZNF277     | 2.7   | 1.0 | 3.7   | 1.4 | 5.44E-04 | 2.8   | 1.0  | 5.00E-03 |   |   |
| C19orf63   | 25.1  | 1.0 | 34.0  | 1.4 | 3.31E-02 | 27.3  | 1.1  | 4.14E-03 |   |   |
| POLR2G     | 11.7  | 1.0 | 15.9  | 1.4 | 4.03E-03 | 13.6  | 1.2  | 6.65E-02 |   |   |
| FXYD1      | 103.5 | 1.0 | 140.4 | 1.4 | 7.03E-03 | 138.6 | 1.3  | 7.94E-01 |   |   |
| IRF2BP2    | 12.7  | 1.0 | 17.2  | 1.4 | 1.52E-02 | 16.8  | 1.3  | 8.82E-01 |   |   |
| TLL1       | 2.7   | 1.0 | 3.7   | 1.4 | 1.26E-03 | 3.6   | 1.3  | 6.54E-01 |   |   |
| HSPB8      | 90.4  | 1.0 | 122.6 | 1.4 | 1.54E-04 | 122.6 | 1.4  | 9.97E-01 |   |   |
| KIAA0226   | 2.7   | 1.0 | 3.6   | 1.4 | 2.53E-03 | 3.4   | 1.3  | 4.97E-01 |   |   |
| ZNF830     | 2.8   | 1.0 | 3.8   | 1.4 | 1.01E-03 | 3.7   | 1.3  | 7.12E-01 |   |   |
| B4GALT2    | 7.4   | 1.0 | 10.0  | 1.4 | 3.54E-02 | 8.4   | 1.1  | 2.41E-01 |   |   |
| HSD17B12   | 13.5  | 1.0 | 18.3  | 1.4 | 2.17E-02 | 13.7  | 1.0  | 8.59E-03 | v | v |
| USP5       | 10.6  | 1.0 | 14.4  | 1.4 | 7.57E-04 | 11.6  | 1.1  | 4.45E-02 |   |   |
| ANP32A     | 19.9  | 1.0 | 27.0  | 1.4 | 2.41E-05 | 22.3  | 1.1  | 5.57E-03 |   |   |
| CHIC2      | 2.0   | 1.0 | 2.7   | 1.4 | 3.61E-02 | 3.0   | 1.5  | 3.53E-01 |   |   |
| GLRX       | 24.6  | 1.0 | 33.4  | 1.4 | 3.25E-03 | 27.4  | 1.1  | 3.16E-02 |   |   |
| PSMD10     | 5.1   | 1.0 | 6.9   | 1.4 | 1.96E-03 | 5.6   | 1.1  | 8.21E-02 |   |   |
| GUK1       | 49.0  | 1.0 | 66.3  | 1.4 | 1.57E-03 | 56.8  | 1.2  | 4.24E-02 |   |   |
| SMARCE1    | 20.1  | 1.0 | 27.2  | 1.4 | 3.56E-04 | 23.2  | 1.2  | 8.35E-02 |   |   |
| NIPSNAP1   | 7.0   | 1.0 | 9.4   | 1.4 | 3.09E-02 | 7.2   | 1.0  | 5.69E-03 |   |   |
| SLC44A2    | 19.2  | 1.0 | 26.0  | 1.4 | 3.44E-03 | 19.7  | 1.0  | 1.13E-02 |   |   |
| METTL23    | 4.8   | 1.0 | 6.5   | 1.4 | 2.41E-02 | 5.2   | 1.1  | 4.68E-02 |   |   |
| FBXO31     | 8.4   | 1.0 | 11.4  | 1.4 | 8.01E-04 | 11.1  | 1.3  | 7.44E-01 |   |   |
| RAP1B      | 13.2  | 1.0 | 17.8  | 1.4 | 3.26E-02 | 15.4  | 1.2  | 3.65E-01 |   |   |
| NFATC1     | 2.8   | 1.0 | 3.8   | 1.4 | 2.27E-02 | 2.9   | 1.0  | 1.35E-02 |   |   |
| WLS        | 16.3  | 1.0 | 22.0  | 1.4 | 1.10E-03 | 18.2  | 1.1  | 1.18E-02 |   |   |
| HPRT1      | 6.6   | 1.0 | 8.9   | 1.4 | 6.75E-04 | 7.6   | 1.2  | 1.04E-01 |   |   |
| CCDC90B    | 6.5   | 1.0 | 8.8   | 1.4 | 7.08E-04 | 7.5   | 1.2  | 1.67E-01 |   |   |
| THAP3      | 3.2   | 1.0 | 4.4   | 1.4 | 1.41E-02 | 3.6   | 1.1  | 2.98E-02 |   |   |
| PPT2       | 5.7   | 1.0 | 7.7   | 1.4 | 2.39E-04 | 5.8   | 1.0  | 2.19E-03 | v | v |
| PIK3C2B    | 2.7   | 1.0 | 3.7   | 1.4 | 2.70E-02 | 2.5   | -1.1 | 2.78E-02 | v | v |
| ERCC3      | 7.3   | 1.0 | 9.8   | 1.4 | 1.68E-05 | 8.5   | 1.2  | 5.90E-02 |   |   |
| RNH1       | 34.6  | 1.0 | 46.7  | 1.3 | 1.29E-02 | 38.0  | 1.1  | 6.76E-02 |   |   |
| SMG5       | 19.2  | 1.0 | 26.0  | 1.3 | 2.70E-03 | 22.3  | 1.2  | 1.78E-01 |   |   |
| ISG20L2    | 3.1   | 1.0 | 4.2   | 1.3 | 1.14E-03 | 3.8   | 1.2  | 3.55E-01 |   |   |
| RAB8A      | 4.2   | 1.0 | 5.7   | 1.3 | 4.07E-02 | 5.1   | 1.2  | 4.91E-01 |   |   |
| GFOD2      | 1.6   | 1.0 | 2.2   | 1.3 | 1.68E-02 | 1.9   | 1.2  | 2.72E-01 |   |   |
| KRI1       | 3.2   | 1.0 | 4.3   | 1.3 | 1.06E-03 | 3.8   | 1.2  | 1.49E-01 |   |   |
| NME7       | 2.3   | 1.0 | 3.1   | 1.3 | 1.25E-02 | 2.2   | -1.0 | 6.54E-02 |   |   |
| TMEM50A    | 12.9  | 1.0 | 17.4  | 1.3 | 3.10E-03 | 15.1  | 1.2  | 1.68E-01 |   |   |
| UNC50      | 7.8   | 1.0 | 10.5  | 1.3 | 5.63E-04 | 8.3   | 1.1  | 1.42E-02 |   |   |
| ST6GALNAC6 | 12.9  | 1.0 | 17.4  | 1.3 | 2.23E-02 | 13.2  | 1.0  | 8.46E-02 |   |   |
| CCDC82     | 3.3   | 1.0 | 4.5   | 1.3 | 4.81E-03 | 3.8   | 1.1  | 5.62E-02 |   |   |
| ARSA       | 3.3   | 1.0 | 4.4   | 1.3 | 1.77E-02 | 3.8   | 1.1  | 1.65E-01 |   |   |
| DCBLD2     | 6.0   | 1.0 | 8.0   | 1.3 | 2.37E-02 | 7.5   | 1.3  | 6.71E-01 |   |   |
| NTN4       | 20.3  | 1.0 | 27.3  | 1.3 | 4.70E-03 | 19.1  | -1.1 | 5.95E-03 | v | v |
| CAMLG      | 4.3   | 1.0 | 5.9   | 1.3 | 1.81E-02 | 4.8   | 1.1  | 1.02E-01 |   |   |
| C1orf122   | 6.7   | 1.0 | 9.0   | 1.3 | 4.77E-02 | 7.9   | 1.2  | 1.75E-01 |   |   |
| C16orf53   | 2.8   | 1.0 | 3.8   | 1.3 | 2.37E-02 | 3.4   | 1.2  | 3.42E-01 |   |   |
| SEPT15     | 14.5  | 1.0 | 19.5  | 1.3 | 3.69E-02 | 16.9  | 1.2  | 3.32E-01 |   |   |
| MPHOSPH8   | 9.4   | 1.0 | 12.6  | 1.3 | 1.70E-04 | 10.5  | 1.1  | 1.49E-02 |   |   |
| GLG1       | 10.5  | 1.0 | 14.1  | 1.3 | 6.73E-04 | 11.3  | 1.1  | 7.93E-02 |   |   |
| DAXX       | 4.6   | 1.0 | 6.2   | 1.3 | 7.64E-03 | 5.2   | 1.1  | 1.48E-01 |   |   |
| C10orf76   | 10.1  | 1.0 | 13.6  | 1.3 | 4.08E-03 | 13.8  | 1.4  | 8.44E-01 |   |   |
| NAT9       | 3.3   | 1.0 | 4.4   | 1.3 | 1.83E-02 | 4.2   | 1.3  | 5.61E-01 |   |   |
| TNRC18     | 3.7   | 1.0 | 5.0   | 1.3 | 4.47E-02 | 3.6   | -1.0 | 5.59E-02 |   |   |
| NCAPH2     | 5.4   | 1.0 | 7.3   | 1.3 | 2.16E-03 | 6.9   | 1.3  | 5.16E-01 |   |   |
| TERF2      | 3.3   | 1.0 | 4.4   | 1.3 | 7.71E-04 | 3.7   | 1.1  | 1.40E-01 |   |   |
| HEY1       | 4.5   | 1.0 | 6.1   | 1.3 | 2.03E-02 | 7.0   | 1.6  | 2.35E-01 |   |   |
| TBCK       | 1.8   | 1.0 | 2.5   | 1.3 | 1.70E-02 | 2.3   | 1.2  | 5.69E-01 |   |   |
| C1orf131   | 2.3   | 1.0 | 3.0   | 1.3 | 9.72E-03 | 2.5   | 1.1  | 5.14E-02 |   |   |
| CNNM3      | 1.8   | 1.0 | 2.4   | 1.3 | 2.91E-02 | 1.9   | 1.1  | 1.79E-02 |   |   |
| NAT6       | 2.8   | 1.0 | 3.8   | 1.3 | 6.77E-03 | 3.5   | 1.2  | 4.96E-01 |   |   |
| FAM82A2    | 4.8   | 1.0 | 6.4   | 1.3 | 1.92E-03 | 5.8   | 1.2  | 2.38E-01 |   |   |
| MTMR3      | 4.8   | 1.0 | 6.5   | 1.3 | 4.93E-03 | 5.6   | 1.2  | 1.67E-01 |   |   |
| ZNF323     | 1.4   | 1.0 | 1.9   | 1.3 | 7.55E-03 | 1.5   | 1.1  | 1.54E-01 |   |   |
| RING1      | 8.9   | 1.0 | 12.0  | 1.3 | 5.32E-03 | 11.0  | 1.2  | 3.55E-01 |   |   |
| PAK4       | 2.8   | 1.0 | 3.7   | 1.3 | 2.62E-04 | 3.4   | 1.2  | 2.37E-01 |   |   |
| TSPAN3     | 14.8  | 1.0 | 19.9  | 1.3 | 3.01E-03 | 17.8  | 1.2  | 1.54E-01 |   |   |
| SSBP2      | 8.5   | 1.0 | 11.4  | 1.3 | 1.63E-02 | 10.2  | 1.2  | 3.16E-01 |   |   |
| FRS3       | 2.3   | 1.0 | 3.1   | 1.3 | 1.02E-02 | 2.9   | 1.3  | 3.73E-01 |   |   |
| BRD8       | 7.6   | 1.0 | 10.2  | 1.3 | 2.63E-03 | 9.8   | 1.3  | 5.35E-01 |   |   |
| RHOBTB1    | 4.1   | 1.0 | 5.5   | 1.3 | 3.85E-02 | 5.0   | 1.2  | 5.05E-01 |   |   |
| ARL15      | 3.2   | 1.0 | 4.2   | 1.3 | 1.40E-03 | 4.1   | 1.3  | 8.21E-01 |   |   |
| FLT4       | 1.8   | 1.0 | 2.4   | 1.3 | 1.46E-02 | 2.5   | 1.4  | 8.66E-01 |   |   |
| BIN3       | 3.0   | 1.0 | 4.0   | 1.3 | 5.09E-03 | 3.3   | 1.1  | 6.11E-02 |   |   |
| GEMIN8     | 1.8   | 1.0 | 2.4   | 1.3 | 1.46E-02 | 2.4   | 1.3  | 9.68E-01 |   |   |
| ATP6V1B2   | 11.4  | 1.0 | 15.2  | 1.3 | 5.73E-06 | 12.8  | 1.1  | 5.15E-03 |   |   |
| ARHGEF2    | 8.0   | 1.0 | 10.7  | 1.3 | 2.63E-02 | 8.2   | 1.0  | 8.04E-02 |   |   |
| BTG1       | 8.1   | 1.0 | 10.8  | 1.3 | 3.92E-02 | 9.9   | 1.2  | 3.97E-01 |   |   |
| BCOR       | 3.3   | 1.0 | 4.4   | 1.3 | 3.46E-03 | 3.2   | -1.0 | 6.98E-03 | v | v |
| SOCS7      | 2.2   | 1.0 | 2.9   | 1.3 | 3.51E-04 | 2.5   | 1.1  | 5.27E-02 |   |   |
| TOR3A      | 2.9   | 1.0 | 3.9   | 1.3 | 2.44E-02 | 3.2   | 1.1  | 1.12E-01 |   |   |
| C8orf41    | 1.9   | 1.0 | 2.5   | 1.3 | 1.55E-03 | 2.2   | 1.2  | 2.80E-01 |   |   |
| EML4       | 1.7   | 1.0 | 2.3   | 1.3 | 1.49E-02 | 2.0   | 1.2  | 4.17E-01 |   |   |

|              |      |     |      |     |          |      |      |          |   |   |
|--------------|------|-----|------|-----|----------|------|------|----------|---|---|
| PLD3         | 28.9 | 1.0 | 38.8 | 1.3 | 2.58E-02 | 32.3 | 1.1  | 1.50E-01 |   |   |
| ZFYVE1       | 3.1  | 1.0 | 4.2  | 1.3 | 9.25E-03 | 3.4  | 1.1  | 7.37E-02 |   |   |
| CIR1         | 9.3  | 1.0 | 12.5 | 1.3 | 4.10E-03 | 10.5 | 1.1  | 1.16E-01 |   |   |
| PRKAB1       | 3.2  | 1.0 | 4.3  | 1.3 | 2.23E-02 | 4.7  | 1.5  | 4.97E-01 |   |   |
| KIAA0247     | 4.6  | 1.0 | 6.2  | 1.3 | 3.01E-04 | 5.9  | 1.3  | 7.11E-01 |   |   |
| GTPBP1       | 4.4  | 1.0 | 5.9  | 1.3 | 6.11E-04 | 5.4  | 1.2  | 2.65E-01 |   |   |
| THAP6        | 1.9  | 1.0 | 2.5  | 1.3 | 3.59E-05 | 2.0  | 1.1  | 6.85E-03 |   |   |
| HNRNPA0      | 9.0  | 1.0 | 12.0 | 1.3 | 7.17E-03 | 11.7 | 1.3  | 8.22E-01 |   |   |
| AMT          | 7.7  | 1.0 | 10.3 | 1.3 | 1.24E-02 | 9.4  | 1.2  | 2.28E-01 |   |   |
| MAPK11       | 2.8  | 1.0 | 3.7  | 1.3 | 1.18E-02 | 3.3  | 1.2  | 3.68E-01 |   |   |
| ABCA2        | 5.2  | 1.0 | 6.9  | 1.3 | 3.13E-03 | 5.2  | 1.0  | 2.24E-02 |   |   |
| CUX1         | 24.5 | 1.0 | 32.8 | 1.3 | 7.64E-04 | 30.9 | 1.3  | 3.60E-01 |   |   |
| ESYT1        | 7.4  | 1.0 | 9.9  | 1.3 | 4.12E-03 | 7.5  | 1.0  | 4.43E-02 |   |   |
| PPT1         | 9.1  | 1.0 | 12.2 | 1.3 | 2.89E-02 | 10.1 | 1.1  | 2.43E-01 |   |   |
| TNPO2        | 7.6  | 1.0 | 10.1 | 1.3 | 7.64E-04 | 8.7  | 1.1  | 7.70E-02 |   |   |
| NICN1        | 3.3  | 1.0 | 4.5  | 1.3 | 5.95E-03 | 3.9  | 1.2  | 1.21E-01 |   |   |
| THOC1        | 3.5  | 1.0 | 4.7  | 1.3 | 9.51E-03 | 4.4  | 1.2  | 2.68E-01 |   |   |
| C7orf50      | 14.3 | 1.0 | 19.1 | 1.3 | 9.00E-03 | 17.2 | 1.2  | 1.73E-01 |   |   |
| C1orf216     | 3.3  | 1.0 | 4.3  | 1.3 | 1.02E-02 | 3.5  | 1.1  | 7.86E-02 |   |   |
| PLA2G6       | 2.5  | 1.0 | 3.3  | 1.3 | 3.51E-02 | 3.4  | 1.4  | 6.98E-01 |   |   |
| NHSL1        | 4.6  | 1.0 | 6.1  | 1.3 | 2.05E-02 | 4.8  | 1.0  | 1.30E-01 |   |   |
| NRBF2        | 3.4  | 1.0 | 4.5  | 1.3 | 1.97E-02 | 4.3  | 1.3  | 7.10E-01 |   |   |
| GABARAPL2    | 66.0 | 1.0 | 88.2 | 1.3 | 2.91E-04 | 72.3 | 1.1  | 1.91E-02 |   |   |
| COMMD6       | 8.8  | 1.0 | 11.7 | 1.3 | 3.69E-03 | 11.3 | 1.3  | 7.67E-01 |   |   |
| PJA1         | 4.0  | 1.0 | 5.3  | 1.3 | 2.76E-02 | 4.2  | 1.1  | 1.28E-01 |   |   |
| TMEM110      | 1.7  | 1.0 | 2.3  | 1.3 | 2.32E-02 | 1.7  | 1.0  | 7.00E-02 |   |   |
| TMEM127      | 17.4 | 1.0 | 23.3 | 1.3 | 1.38E-03 | 15.9 | -1.1 | 1.66E-03 | √ | √ |
| TYRP1        | 11.0 | 1.0 | 14.6 | 1.3 | 4.07E-02 | 13.9 | 1.3  | 7.19E-01 |   |   |
| LAMA2        | 27.5 | 1.0 | 36.7 | 1.3 | 2.26E-02 | 27.6 | 1.0  | 1.84E-02 |   |   |
| DOLK         | 2.6  | 1.0 | 3.5  | 1.3 | 2.37E-03 | 2.8  | 1.1  | 4.31E-02 |   |   |
| HNRNPC       | 40.5 | 1.0 | 54.0 | 1.3 | 1.20E-04 | 50.3 | 1.2  | 3.92E-01 |   |   |
| DVL2         | 3.1  | 1.0 | 4.2  | 1.3 | 1.01E-02 | 3.9  | 1.2  | 5.18E-01 |   |   |
| LOC100306951 | 5.1  | 1.0 | 6.8  | 1.3 | 3.70E-02 | 5.6  | 1.1  | 6.24E-02 |   |   |
| U2AF1L4      | 4.7  | 1.0 | 6.2  | 1.3 | 2.94E-02 | 6.7  | 1.4  | 2.09E-01 |   |   |
| CCDC137      | 1.8  | 1.0 | 2.4  | 1.3 | 3.77E-03 | 2.2  | 1.2  | 3.55E-01 |   |   |
| SSH3         | 3.3  | 1.0 | 4.4  | 1.3 | 2.69E-02 | 3.4  | 1.0  | 5.32E-02 |   |   |
| SYF2         | 12.7 | 1.0 | 16.9 | 1.3 | 5.88E-03 | 15.3 | 1.2  | 3.71E-01 |   |   |
| DBNL         | 10.7 | 1.0 | 14.3 | 1.3 | 1.18E-02 | 11.8 | 1.1  | 8.25E-02 |   |   |
| ICK          | 1.7  | 1.0 | 2.3  | 1.3 | 3.62E-02 | 2.0  | 1.1  | 2.65E-01 |   |   |
| ATF6B        | 10.1 | 1.0 | 13.5 | 1.3 | 5.88E-03 | 12.0 | 1.2  | 1.84E-01 |   |   |
| SEPT7        | 41.3 | 1.0 | 54.9 | 1.3 | 5.10E-03 | 46.4 | 1.1  | 1.76E-01 |   |   |
| ADAR         | 11.9 | 1.0 | 15.9 | 1.3 | 3.18E-02 | 11.2 | -1.1 | 4.80E-02 | √ | √ |
| EDEM2        | 3.2  | 1.0 | 4.2  | 1.3 | 4.90E-02 | 3.8  | 1.2  | 2.63E-01 |   |   |
| SCAF1        | 4.3  | 1.0 | 5.7  | 1.3 | 2.81E-05 | 5.4  | 1.2  | 3.36E-01 |   |   |
| KIF3B        | 2.7  | 1.0 | 3.6  | 1.3 | 6.90E-03 | 2.9  | 1.1  | 5.08E-02 |   |   |
| GLT8D1       | 7.8  | 1.0 | 10.4 | 1.3 | 1.42E-02 | 8.5  | 1.1  | 1.41E-01 |   |   |
| PRELID1      | 10.4 | 1.0 | 13.8 | 1.3 | 3.82E-02 | 13.6 | 1.3  | 8.47E-01 |   |   |
| PDXP         | 5.2  | 1.0 | 6.9  | 1.3 | 2.28E-03 | 5.5  | 1.0  | 3.07E-02 |   |   |
| BACE1        | 4.0  | 1.0 | 5.3  | 1.3 | 3.20E-03 | 4.0  | 1.0  | 3.80E-02 |   |   |
| BCL7A        | 3.3  | 1.0 | 4.4  | 1.3 | 9.43E-03 | 4.2  | 1.3  | 5.01E-01 |   |   |
| STXBP1       | 8.0  | 1.0 | 10.6 | 1.3 | 5.54E-03 | 8.3  | 1.0  | 2.67E-02 |   |   |
| CHMP4A       | 9.8  | 1.0 | 13.1 | 1.3 | 1.39E-02 | 11.7 | 1.2  | 3.94E-01 |   |   |
| NDE1         | 2.0  | 1.0 | 2.6  | 1.3 | 2.67E-02 | 2.0  | 1.0  | 6.91E-02 |   |   |
| PGAM1        | 72.4 | 1.0 | 96.3 | 1.3 | 1.40E-02 | 74.0 | 1.0  | 1.25E-02 |   |   |
| SLC35B3      | 2.3  | 1.0 | 3.0  | 1.3 | 4.95E-02 | 2.7  | 1.2  | 9.28E-02 |   |   |
| NENF         | 27.3 | 1.0 | 36.3 | 1.3 | 8.52E-03 | 33.7 | 1.2  | 3.16E-01 |   |   |
| SLC35A5      | 3.0  | 1.0 | 4.0  | 1.3 | 2.11E-04 | 3.2  | 1.1  | 8.62E-02 |   |   |
| KIAA1370     | 5.5  | 1.0 | 7.3  | 1.3 | 1.18E-02 | 7.2  | 1.3  | 9.08E-01 |   |   |
| ZBTB45       | 2.3  | 1.0 | 3.1  | 1.3 | 8.40E-04 | 2.6  | 1.1  | 1.73E-01 |   |   |
| ACVR1        | 5.6  | 1.0 | 7.5  | 1.3 | 2.91E-02 | 5.7  | 1.0  | 9.90E-02 |   |   |
| SLC35A1      | 4.0  | 1.0 | 5.3  | 1.3 | 3.96E-02 | 4.1  | 1.0  | 3.09E-02 |   |   |
| GLB1         | 4.3  | 1.0 | 5.7  | 1.3 | 1.42E-02 | 4.5  | 1.0  | 1.21E-01 |   |   |
| ISY1-RAB43   | 2.5  | 1.0 | 3.3  | 1.3 | 4.11E-02 | 2.7  | 1.1  | 2.29E-01 |   |   |
| STX16        | 9.7  | 1.0 | 12.8 | 1.3 | 6.11E-03 | 12.1 | 1.3  | 5.16E-01 |   |   |
| AKIRIN2      | 8.4  | 1.0 | 11.2 | 1.3 | 7.55E-03 | 11.3 | 1.3  | 9.05E-01 |   |   |
| IDI1         | 4.5  | 1.0 | 6.0  | 1.3 | 1.15E-02 | 5.6  | 1.2  | 3.75E-01 |   |   |
| AP4S1        | 2.3  | 1.0 | 3.0  | 1.3 | 1.35E-02 | 2.5  | 1.1  | 1.09E-01 |   |   |
| PHF13        | 1.5  | 1.0 | 2.0  | 1.3 | 1.18E-02 | 2.0  | 1.3  | 8.26E-01 |   |   |
| SEPT8        | 7.8  | 1.0 | 10.4 | 1.3 | 3.06E-02 | 8.9  | 1.1  | 3.59E-01 |   |   |
| TNFRSF25     | 3.3  | 1.0 | 4.3  | 1.3 | 1.23E-02 | 4.4  | 1.3  | 8.96E-01 |   |   |
| RABGGTB      | 14.1 | 1.0 | 18.7 | 1.3 | 3.06E-04 | 17.6 | 1.2  | 3.60E-01 |   |   |
| PHLDB2       | 14.9 | 1.0 | 19.8 | 1.3 | 4.33E-02 | 17.3 | 1.2  | 4.49E-01 |   |   |
| AGTRAP       | 4.8  | 1.0 | 6.3  | 1.3 | 1.04E-02 | 7.1  | 1.5  | 2.68E-01 |   |   |
| APTX         | 3.6  | 1.0 | 4.7  | 1.3 | 3.51E-04 | 4.3  | 1.2  | 4.08E-02 |   |   |
| ARMCX6       | 7.9  | 1.0 | 10.5 | 1.3 | 3.60E-02 | 9.3  | 1.2  | 3.20E-01 |   |   |
| NUB1         | 10.1 | 1.0 | 13.4 | 1.3 | 1.72E-04 | 10.9 | 1.1  | 6.12E-02 |   |   |
| ZNF574       | 2.1  | 1.0 | 2.8  | 1.3 | 1.34E-02 | 2.3  | 1.1  | 1.28E-01 |   |   |
| BUD31        | 6.7  | 1.0 | 8.9  | 1.3 | 2.15E-02 | 7.7  | 1.2  | 2.38E-01 |   |   |
| ANTXR2       | 5.3  | 1.0 | 7.0  | 1.3 | 9.86E-03 | 6.0  | 1.1  | 2.34E-01 |   |   |
| MICAL2       | 8.8  | 1.0 | 11.6 | 1.3 | 4.60E-03 | 9.8  | 1.1  | 3.48E-02 |   |   |
| ZSCAN21      | 1.8  | 1.0 | 2.4  | 1.3 | 1.40E-02 | 2.3  | 1.3  | 5.41E-01 |   |   |
| TMED4        | 18.6 | 1.0 | 24.6 | 1.3 | 8.54E-04 | 19.2 | 1.0  | 8.44E-03 |   |   |
| GEMIN6       | 2.9  | 1.0 | 3.9  | 1.3 | 4.77E-02 | 3.5  | 1.2  | 4.96E-01 |   |   |
| TRIP4        | 4.2  | 1.0 | 5.5  | 1.3 | 1.74E-03 | 4.2  | 1.0  | 2.27E-02 |   |   |



|           |       |     |       |     |          |       |      |          |   |   |
|-----------|-------|-----|-------|-----|----------|-------|------|----------|---|---|
| GALNT2    | 7.3   | 1.0 | 9.7   | 1.3 | 1.43E-02 | 8.1   | 1.1  | 1.63E-01 |   |   |
| GNAI3     | 2.5   | 1.0 | 3.3   | 1.3 | 4.54E-02 | 2.8   | 1.1  | 3.52E-01 |   |   |
| ZNF337    | 3.5   | 1.0 | 4.7   | 1.3 | 1.26E-02 | 4.0   | 1.1  | 6.41E-02 |   |   |
| SLBP      | 4.0   | 1.0 | 5.3   | 1.3 | 1.62E-02 | 4.8   | 1.2  | 4.51E-01 |   |   |
| MAPRE2    | 31.8  | 1.0 | 42.1  | 1.3 | 2.09E-02 | 45.2  | 1.4  | 6.74E-01 |   |   |
| GSTA4     | 5.0   | 1.0 | 6.6   | 1.3 | 3.03E-02 | 6.1   | 1.2  | 4.47E-01 |   |   |
| CDK7      | 3.6   | 1.0 | 4.8   | 1.3 | 1.04E-03 | 4.1   | 1.1  | 5.48E-02 |   |   |
| PRR12     | 2.3   | 1.0 | 3.1   | 1.3 | 1.35E-02 | 2.4   | 1.0  | 8.54E-02 |   |   |
| CWF19L2   | 2.1   | 1.0 | 2.8   | 1.3 | 1.30E-02 | 2.4   | 1.1  | 1.97E-01 |   |   |
| TCF3      | 2.5   | 1.0 | 3.3   | 1.3 | 2.58E-02 | 3.1   | 1.2  | 5.85E-01 |   |   |
| PHF12     | 4.2   | 1.0 | 5.5   | 1.3 | 1.36E-02 | 4.6   | 1.1  | 1.62E-01 |   |   |
| HEXB      | 25.6  | 1.0 | 33.9  | 1.3 | 2.49E-02 | 30.8  | 1.2  | 4.14E-01 |   |   |
| C11orf17  | 3.6   | 1.0 | 4.7   | 1.3 | 1.32E-02 | 3.8   | 1.1  | 1.12E-02 |   |   |
| UHRF2     | 3.1   | 1.0 | 4.1   | 1.3 | 2.72E-03 | 3.7   | 1.2  | 1.42E-01 |   |   |
| DCPS      | 3.4   | 1.0 | 4.6   | 1.3 | 1.73E-02 | 4.5   | 1.3  | 8.80E-01 |   |   |
| RNMT      | 4.7   | 1.0 | 6.2   | 1.3 | 3.25E-03 | 4.8   | 1.0  | 6.18E-03 |   |   |
| LUZP6     | 7.3   | 1.0 | 9.6   | 1.3 | 1.80E-02 | 8.1   | 1.1  | 3.00E-01 |   |   |
| MTPN      | 7.3   | 1.0 | 9.6   | 1.3 | 1.80E-02 | 8.1   | 1.1  | 3.00E-01 |   |   |
| CCNI      | 52.4  | 1.0 | 69.3  | 1.3 | 1.43E-03 | 58.6  | 1.1  | 1.12E-01 |   |   |
| COMMD8    | 4.4   | 1.0 | 5.8   | 1.3 | 1.32E-02 | 4.4   | -1.0 | 5.74E-02 |   |   |
| PGM3      | 1.9   | 1.0 | 2.5   | 1.3 | 6.45E-04 | 2.0   | 1.1  | 8.86E-02 |   |   |
| GPR107    | 6.3   | 1.0 | 8.3   | 1.3 | 4.04E-03 | 6.6   | 1.0  | 7.09E-02 |   |   |
| ORAI3     | 2.5   | 1.0 | 3.3   | 1.3 | 4.44E-02 | 2.5   | -1.0 | 1.19E-02 | v | v |
| SPPL3     | 4.4   | 1.0 | 5.8   | 1.3 | 8.80E-03 | 5.3   | 1.2  | 3.83E-01 |   |   |
| CASP9     | 3.0   | 1.0 | 4.0   | 1.3 | 7.31E-03 | 3.9   | 1.3  | 6.79E-01 |   |   |
| KDM4A     | 3.5   | 1.0 | 4.6   | 1.3 | 4.32E-03 | 3.8   | 1.1  | 5.85E-02 |   |   |
| CDKN1B    | 11.5  | 1.0 | 15.2  | 1.3 | 1.05E-03 | 13.2  | 1.1  | 3.08E-01 |   |   |
| ZNF384    | 5.3   | 1.0 | 7.0   | 1.3 | 1.86E-03 | 6.0   | 1.1  | 8.72E-02 |   |   |
| C9orf16   | 12.1  | 1.0 | 16.0  | 1.3 | 4.51E-02 | 15.2  | 1.3  | 3.59E-01 |   |   |
| RECQL5    | 1.9   | 1.0 | 2.4   | 1.3 | 9.69E-03 | 2.5   | 1.4  | 7.76E-01 |   |   |
| SMARCC1   | 3.9   | 1.0 | 5.1   | 1.3 | 4.51E-03 | 4.5   | 1.2  | 2.59E-01 |   |   |
| NDST2     | 2.6   | 1.0 | 3.5   | 1.3 | 5.69E-03 | 2.9   | 1.1  | 1.24E-01 |   |   |
| CREB3     | 6.5   | 1.0 | 8.5   | 1.3 | 4.40E-02 | 6.6   | 1.0  | 5.80E-02 |   |   |
| PLOD3     | 6.6   | 1.0 | 8.7   | 1.3 | 1.91E-02 | 7.6   | 1.2  | 2.33E-01 |   |   |
| LRP5      | 8.5   | 1.0 | 11.1  | 1.3 | 7.15E-03 | 9.3   | 1.1  | 6.06E-02 |   |   |
| SH2B1     | 9.3   | 1.0 | 12.2  | 1.3 | 9.19E-04 | 11.1  | 1.2  | 4.09E-02 |   |   |
| GLI4      | 3.1   | 1.0 | 4.1   | 1.3 | 4.72E-03 | 4.2   | 1.3  | 8.27E-01 |   |   |
| PRICKLE2  | 1.1   | 1.0 | 1.4   | 1.3 | 1.79E-02 | 1.4   | 1.3  | 9.81E-01 |   |   |
| EXT2      | 6.9   | 1.0 | 9.0   | 1.3 | 1.39E-02 | 7.5   | 1.1  | 1.45E-01 |   |   |
| C14orf128 | 2.4   | 1.0 | 3.1   | 1.3 | 3.31E-02 | 2.7   | 1.1  | 2.82E-01 |   |   |
| NACA      | 122.3 | 1.0 | 161.0 | 1.3 | 2.82E-03 | 147.3 | 1.2  | 2.81E-01 |   |   |
| NCAPD2    | 2.5   | 1.0 | 3.3   | 1.3 | 9.55E-03 | 2.4   | -1.0 | 1.90E-02 | v | v |
| KIF13B    | 1.9   | 1.0 | 2.4   | 1.3 | 2.69E-02 | 2.3   | 1.2  | 5.74E-01 |   |   |
| IGSF8     | 4.8   | 1.0 | 6.3   | 1.3 | 2.72E-04 | 5.6   | 1.2  | 1.22E-01 |   |   |
| BRD3      | 3.3   | 1.0 | 4.4   | 1.3 | 2.24E-03 | 3.5   | 1.1  | 2.34E-02 |   |   |
| GCC1      | 1.9   | 1.0 | 2.5   | 1.3 | 1.43E-03 | 1.9   | 1.0  | 6.98E-02 |   |   |
| SIAH2     | 4.2   | 1.0 | 5.6   | 1.3 | 1.39E-04 | 5.5   | 1.3  | 9.19E-01 |   |   |
| PLEKHB2   | 8.3   | 1.0 | 11.0  | 1.3 | 1.20E-03 | 8.6   | 1.0  | 3.17E-02 |   |   |
| PRR14     | 4.8   | 1.0 | 6.3   | 1.3 | 4.67E-02 | 5.5   | 1.1  | 2.20E-01 |   |   |
| OAZ2      | 22.3  | 1.0 | 29.3  | 1.3 | 3.18E-03 | 27.1  | 1.2  | 3.93E-01 |   |   |
| TMUB2     | 6.1   | 1.0 | 8.0   | 1.3 | 6.75E-03 | 6.4   | 1.1  | 1.51E-02 |   |   |
| WWC3      | 8.1   | 1.0 | 10.6  | 1.3 | 1.20E-03 | 8.5   | 1.1  | 2.44E-02 |   |   |
| VIPAR     | 4.7   | 1.0 | 6.1   | 1.3 | 2.51E-03 | 5.9   | 1.3  | 4.68E-01 |   |   |
| CIDEB     | 2.4   | 1.0 | 3.1   | 1.3 | 2.23E-02 | 2.6   | 1.1  | 1.13E-01 |   |   |
| PGAP3     | 3.4   | 1.0 | 4.5   | 1.3 | 1.76E-02 | 3.9   | 1.1  | 4.80E-02 |   |   |
| FCF1      | 2.9   | 1.0 | 3.8   | 1.3 | 1.11E-03 | 3.2   | 1.1  | 1.82E-01 |   |   |
| C16orf45  | 19.2  | 1.0 | 25.2  | 1.3 | 5.16E-03 | 22.2  | 1.2  | 1.83E-01 |   |   |
| C7orf42   | 8.1   | 1.0 | 10.6  | 1.3 | 1.44E-02 | 8.8   | 1.1  | 1.48E-01 |   |   |
| STAT5B    | 7.6   | 1.0 | 10.0  | 1.3 | 2.38E-02 | 8.3   | 1.1  | 1.71E-01 |   |   |
| PHF11     | 5.1   | 1.0 | 6.7   | 1.3 | 2.97E-02 | 5.6   | 1.1  | 4.75E-02 |   |   |
| ERCC2     | 2.5   | 1.0 | 3.3   | 1.3 | 8.86E-03 | 2.8   | 1.1  | 7.83E-02 |   |   |
| VPS41     | 4.2   | 1.0 | 5.5   | 1.3 | 1.39E-05 | 4.4   | 1.1  | 1.76E-02 |   |   |
| ANXA7     | 33.3  | 1.0 | 43.6  | 1.3 | 2.59E-04 | 38.1  | 1.1  | 1.45E-01 |   |   |
| PPWD1     | 5.6   | 1.0 | 7.4   | 1.3 | 1.05E-03 | 6.2   | 1.1  | 5.37E-02 |   |   |
| RXR8      | 7.4   | 1.0 | 9.7   | 1.3 | 6.49E-04 | 8.6   | 1.2  | 7.40E-02 |   |   |
| HDAC5     | 8.3   | 1.0 | 10.9  | 1.3 | 9.45E-04 | 10.1  | 1.2  | 4.23E-01 |   |   |
| PHF1      | 12.4  | 1.0 | 16.2  | 1.3 | 4.54E-03 | 15.6  | 1.3  | 6.90E-01 |   |   |
| LAMP1     | 28.5  | 1.0 | 37.3  | 1.3 | 4.60E-02 | 30.5  | 1.1  | 2.26E-01 |   |   |
| NPTXR     | 3.0   | 1.0 | 3.9   | 1.3 | 2.71E-02 | 2.8   | -1.1 | 4.43E-03 | v | v |
| RBCK1     | 11.1  | 1.0 | 14.5  | 1.3 | 3.47E-02 | 11.9  | 1.1  | 9.65E-02 |   |   |
| ZFP90     | 1.8   | 1.0 | 2.4   | 1.3 | 9.51E-03 | 1.7   | -1.1 | 2.28E-02 | v | v |
| SNX5      | 13.5  | 1.0 | 17.6  | 1.3 | 2.65E-03 | 14.8  | 1.1  | 1.19E-01 |   |   |
| UBTF      | 7.8   | 1.0 | 10.3  | 1.3 | 6.77E-03 | 7.8   | -1.0 | 1.22E-02 |   |   |
| ZNF512B   | 3.0   | 1.0 | 3.9   | 1.3 | 3.98E-04 | 3.4   | 1.1  | 5.25E-02 |   |   |
| ZBTB2     | 1.9   | 1.0 | 2.5   | 1.3 | 3.38E-02 | 2.1   | 1.1  | 2.87E-01 |   |   |
| MPG       | 14.3  | 1.0 | 18.7  | 1.3 | 1.04E-03 | 14.8  | 1.0  | 6.71E-03 |   |   |
| CHERP     | 4.6   | 1.0 | 6.0   | 1.3 | 4.43E-03 | 5.6   | 1.2  | 5.38E-01 |   |   |
| DCTN1     | 38.3  | 1.0 | 50.1  | 1.3 | 2.63E-03 | 49.0  | 1.3  | 8.03E-01 |   |   |
| TMEM42    | 3.5   | 1.0 | 4.6   | 1.3 | 2.74E-02 | 4.2   | 1.2  | 3.85E-01 |   |   |
| SNX8      | 2.7   | 1.0 | 3.5   | 1.3 | 7.10E-03 | 3.1   | 1.2  | 1.65E-01 |   |   |
| HSPC159   | 2.1   | 1.0 | 2.8   | 1.3 | 4.21E-02 | 2.4   | 1.1  | 2.43E-01 |   |   |
| RUSC2     | 6.6   | 1.0 | 8.7   | 1.3 | 2.20E-02 | 8.1   | 1.2  | 4.97E-01 |   |   |
| TRIM27    | 5.0   | 1.0 | 6.6   | 1.3 | 2.19E-03 | 5.6   | 1.1  | 2.47E-02 |   |   |
| UPF1      | 7.3   | 1.0 | 9.5   | 1.3 | 1.34E-03 | 8.9   | 1.2  | 4.12E-01 |   |   |

|           |       |     |       |     |          |       |      |          |   |   |
|-----------|-------|-----|-------|-----|----------|-------|------|----------|---|---|
| MEAF6     | 5.7   | 1.0 | 7.5   | 1.3 | 8.47E-04 | 8.0   | 1.4  | 6.09E-01 |   |   |
| GATAD2B   | 3.0   | 1.0 | 3.9   | 1.3 | 1.63E-03 | 3.7   | 1.2  | 5.28E-01 |   |   |
| HN1L      | 6.0   | 1.0 | 7.9   | 1.3 | 3.80E-02 | 7.7   | 1.3  | 8.96E-01 |   |   |
| POP5      | 11.2  | 1.0 | 14.6  | 1.3 | 1.48E-03 | 11.0  | -1.0 | 9.01E-04 |   |   |
| DNASE2    | 4.6   | 1.0 | 6.0   | 1.3 | 3.17E-02 | 4.2   | -1.1 | 2.47E-02 | v | v |
| FNBP1     | 3.5   | 1.0 | 4.6   | 1.3 | 3.23E-02 | 3.5   | 1.0  | 6.27E-02 |   |   |
| C9orf25   | 6.8   | 1.0 | 8.9   | 1.3 | 3.28E-03 | 8.2   | 1.2  | 4.76E-01 |   |   |
| PIAS3     | 5.4   | 1.0 | 7.0   | 1.3 | 4.70E-02 | 6.6   | 1.2  | 5.88E-01 |   |   |
| ATP6V1C1  | 3.9   | 1.0 | 5.1   | 1.3 | 3.56E-06 | 4.5   | 1.2  | 4.08E-02 |   |   |
| UBE2B     | 23.1  | 1.0 | 30.2  | 1.3 | 3.33E-03 | 26.5  | 1.1  | 1.41E-01 |   |   |
| OSBPL5    | 3.3   | 1.0 | 4.4   | 1.3 | 3.80E-02 | 3.7   | 1.1  | 1.60E-01 |   |   |
| UBE2Z     | 10.0  | 1.0 | 13.0  | 1.3 | 8.91E-04 | 11.2  | 1.1  | 1.06E-01 |   |   |
| PPP2R1A   | 68.7  | 1.0 | 89.7  | 1.3 | 1.13E-03 | 83.0  | 1.2  | 1.57E-01 |   |   |
| CYLD      | 2.9   | 1.0 | 3.8   | 1.3 | 4.12E-03 | 3.5   | 1.2  | 4.67E-01 |   |   |
| ACD       | 2.1   | 1.0 | 2.7   | 1.3 | 2.89E-02 | 2.7   | 1.3  | 9.97E-01 |   |   |
| SMAD1     | 3.2   | 1.0 | 4.1   | 1.3 | 1.68E-02 | 3.6   | 1.1  | 2.34E-01 |   |   |
| CHMP1A    | 10.1  | 1.0 | 13.1  | 1.3 | 2.85E-04 | 11.2  | 1.1  | 2.49E-02 |   |   |
| CIRBP     | 41.8  | 1.0 | 54.5  | 1.3 | 2.01E-02 | 54.5  | 1.3  | 9.93E-01 |   |   |
| DDX18     | 5.9   | 1.0 | 7.6   | 1.3 | 3.77E-03 | 6.6   | 1.1  | 1.47E-01 |   |   |
| C15orf44  | 4.0   | 1.0 | 5.3   | 1.3 | 1.47E-03 | 4.2   | 1.0  | 3.03E-02 |   |   |
| FAM18B1   | 5.8   | 1.0 | 7.6   | 1.3 | 1.56E-03 | 6.6   | 1.1  | 8.10E-02 |   |   |
| FAM110B   | 4.2   | 1.0 | 5.5   | 1.3 | 1.06E-02 | 4.9   | 1.2  | 2.32E-01 |   |   |
| KLRAQ1    | 3.2   | 1.0 | 4.2   | 1.3 | 1.81E-02 | 3.5   | 1.1  | 9.74E-02 |   |   |
| SRSF7     | 8.3   | 1.0 | 10.8  | 1.3 | 7.28E-03 | 10.5  | 1.3  | 7.80E-01 |   |   |
| USP36     | 3.0   | 1.0 | 3.9   | 1.3 | 1.05E-02 | 3.7   | 1.2  | 6.50E-01 |   |   |
| C17orf101 | 3.3   | 1.0 | 4.3   | 1.3 | 1.50E-04 | 3.5   | 1.0  | 3.51E-04 |   |   |
| TAX1BP3   | 36.9  | 1.0 | 48.1  | 1.3 | 2.24E-02 | 47.6  | 1.3  | 8.80E-01 |   |   |
| YPEL3     | 22.4  | 1.0 | 29.2  | 1.3 | 4.84E-02 | 26.2  | 1.2  | 5.29E-01 |   |   |
| PLEKHA3   | 6.0   | 1.0 | 7.9   | 1.3 | 1.23E-04 | 6.7   | 1.1  | 2.61E-02 |   |   |
| ATP13A1   | 4.0   | 1.0 | 5.3   | 1.3 | 1.14E-02 | 5.1   | 1.3  | 6.57E-01 |   |   |
| FOXP4     | 2.7   | 1.0 | 3.5   | 1.3 | 2.88E-02 | 3.5   | 1.3  | 9.93E-01 |   |   |
| KBTBD2    | 7.4   | 1.0 | 9.6   | 1.3 | 5.18E-03 | 7.8   | 1.1  | 2.86E-02 |   |   |
| ATP6VOB   | 18.0  | 1.0 | 23.4  | 1.3 | 1.28E-03 | 19.0  | 1.1  | 7.62E-04 |   |   |
| BBIP1     | 2.7   | 1.0 | 3.5   | 1.3 | 2.49E-02 | 2.8   | 1.0  | 1.94E-02 |   |   |
| CHMP1B    | 9.7   | 1.0 | 12.6  | 1.3 | 2.40E-05 | 11.1  | 1.1  | 4.27E-02 |   |   |
| SLC30A3   | 2.2   | 1.0 | 2.9   | 1.3 | 3.18E-02 | 3.1   | 1.4  | 4.11E-01 |   |   |
| RIOK1     | 2.9   | 1.0 | 3.7   | 1.3 | 3.03E-02 | 3.6   | 1.3  | 8.63E-01 |   |   |
| AKAP2     | 19.8  | 1.0 | 25.7  | 1.3 | 2.96E-03 | 21.7  | 1.1  | 1.21E-01 |   |   |
| PQLC1     | 6.1   | 1.0 | 7.9   | 1.3 | 4.94E-04 | 8.1   | 1.3  | 7.45E-01 |   |   |
| EED       | 2.2   | 1.0 | 2.9   | 1.3 | 1.25E-02 | 2.5   | 1.1  | 1.73E-01 |   |   |
| ZBTB4     | 14.7  | 1.0 | 19.1  | 1.3 | 3.27E-03 | 16.0  | 1.1  | 7.08E-02 |   |   |
| DPP3      | 2.1   | 1.0 | 2.7   | 1.3 | 7.09E-03 | 2.1   | -1.0 | 2.76E-02 |   |   |
| SMYD2     | 99.0  | 1.0 | 128.7 | 1.3 | 4.70E-02 | 118.0 | 1.2  | 5.18E-01 |   |   |
| DYNLT1    | 26.1  | 1.0 | 33.9  | 1.3 | 7.00E-03 | 35.8  | 1.4  | 5.72E-01 |   |   |
| INSR      | 10.5  | 1.0 | 13.7  | 1.3 | 2.75E-02 | 12.7  | 1.2  | 5.17E-01 |   |   |
| PPP2CA    | 32.8  | 1.0 | 42.7  | 1.3 | 8.84E-04 | 37.6  | 1.1  | 1.49E-01 |   |   |
| ALDH9A1   | 15.9  | 1.0 | 20.7  | 1.3 | 2.74E-04 | 16.8  | 1.1  | 9.64E-03 |   |   |
| PRKAR1A   | 123.8 | 1.0 | 160.9 | 1.3 | 3.46E-02 | 141.6 | 1.1  | 2.85E-01 |   |   |
| ABHD4     | 4.9   | 1.0 | 6.3   | 1.3 | 2.04E-02 | 5.5   | 1.1  | 1.78E-01 |   |   |
| PELI1     | 2.6   | 1.0 | 3.4   | 1.3 | 4.71E-02 | 3.8   | 1.4  | 6.33E-01 |   |   |
| KIFC3     | 12.6  | 1.0 | 16.4  | 1.3 | 1.10E-02 | 13.6  | 1.1  | 4.49E-02 |   |   |
| IRF2BPL   | 5.7   | 1.0 | 7.3   | 1.3 | 1.79E-02 | 4.8   | -1.2 | 9.78E-03 |   |   |
| DPH1      | 5.5   | 1.0 | 7.2   | 1.3 | 2.61E-03 | 6.2   | 1.1  | 1.65E-01 |   |   |
| DNAJC17   | 3.1   | 1.0 | 4.0   | 1.3 | 4.46E-03 | 3.6   | 1.2  | 2.56E-01 |   |   |
| TERF1     | 3.7   | 1.0 | 4.8   | 1.3 | 5.95E-05 | 3.8   | 1.0  | 4.11E-02 |   |   |
| EXOC2     | 3.4   | 1.0 | 4.4   | 1.3 | 4.76E-04 | 3.6   | 1.1  | 1.00E-01 |   |   |
| SYNPO     | 122.6 | 1.0 | 159.2 | 1.3 | 4.26E-03 | 118.5 | -1.0 | 3.73E-02 | v | v |
| RNPEP     | 5.1   | 1.0 | 6.6   | 1.3 | 1.93E-02 | 5.1   | -1.0 | 1.83E-02 |   |   |
| ARFGAP1   | 6.4   | 1.0 | 8.3   | 1.3 | 6.84E-03 | 8.2   | 1.3  | 8.33E-01 |   |   |
| FBRS      | 5.6   | 1.0 | 7.3   | 1.3 | 1.00E-02 | 6.2   | 1.1  | 8.08E-02 |   |   |
| HNRNPH3   | 25.3  | 1.0 | 32.9  | 1.3 | 1.86E-03 | 32.1  | 1.3  | 7.64E-01 |   |   |
| RFNG      | 3.3   | 1.0 | 4.3   | 1.3 | 1.65E-02 | 4.3   | 1.3  | 8.85E-01 |   |   |
| CAMK2B    | 18.1  | 1.0 | 23.5  | 1.3 | 8.42E-05 | 23.8  | 1.3  | 7.38E-01 |   |   |
| HPS6      | 2.3   | 1.0 | 3.0   | 1.3 | 1.46E-03 | 2.5   | 1.1  | 3.96E-02 |   |   |
| CLN5      | 3.3   | 1.0 | 4.2   | 1.3 | 4.83E-03 | 3.4   | 1.0  | 8.33E-02 |   |   |
| LOC729234 | 3.7   | 1.0 | 4.8   | 1.3 | 2.23E-02 | 3.5   | -1.1 | 9.43E-02 |   |   |
| HVCN1     | 3.2   | 1.0 | 4.2   | 1.3 | 1.93E-02 | 2.7   | -1.2 | 8.38E-03 |   |   |
| ZNF419    | 1.8   | 1.0 | 2.3   | 1.3 | 1.60E-02 | 2.5   | 1.4  | 4.01E-01 |   |   |
| MKRN2     | 9.9   | 1.0 | 12.9  | 1.3 | 1.30E-03 | 11.2  | 1.1  | 6.95E-02 |   |   |
| MCAT      | 3.2   | 1.0 | 4.2   | 1.3 | 2.60E-03 | 3.5   | 1.1  | 1.28E-02 |   |   |
| CREG1     | 23.7  | 1.0 | 30.7  | 1.3 | 3.11E-02 | 23.1  | -1.0 | 7.50E-02 |   |   |
| MANSC1    | 2.6   | 1.0 | 3.4   | 1.3 | 3.98E-02 | 2.3   | -1.1 | 8.73E-03 |   |   |
| C7orf11   | 3.7   | 1.0 | 4.8   | 1.3 | 5.93E-03 | 4.3   | 1.2  | 2.47E-01 |   |   |
| NIPSNAP3A | 5.7   | 1.0 | 7.4   | 1.3 | 3.61E-02 | 6.5   | 1.1  | 1.24E-01 |   |   |
| PAM       | 126.8 | 1.0 | 164.3 | 1.3 | 1.54E-02 | 116.7 | -1.1 | 5.49E-03 | v | v |
| NAP1L4    | 32.8  | 1.0 | 42.5  | 1.3 | 1.46E-04 | 37.7  | 1.1  | 1.70E-02 |   |   |
| SPTLC1    | 6.6   | 1.0 | 8.5   | 1.3 | 1.27E-02 | 7.1   | 1.1  | 1.82E-01 |   |   |
| HSPD1     | 42.6  | 1.0 | 55.2  | 1.3 | 1.57E-03 | 46.9  | 1.1  | 9.48E-02 |   |   |
| PLOD2     | 3.3   | 1.0 | 4.3   | 1.3 | 4.64E-02 | 3.5   | 1.0  | 1.59E-01 |   |   |
| TRIM39    | 2.4   | 1.0 | 3.1   | 1.3 | 8.94E-04 | 2.7   | 1.2  | 1.84E-01 |   |   |
| RNF103    | 16.0  | 1.0 | 20.7  | 1.3 | 1.02E-02 | 19.7  | 1.2  | 6.23E-01 |   |   |
| CSRP3     | 470.1 | 1.0 | 608.1 | 1.3 | 4.61E-02 | 805.1 | 1.7  | 1.96E-01 |   |   |
| ATG16L1   | 3.8   | 1.0 | 4.9   | 1.3 | 1.23E-04 | 4.0   | 1.1  | 1.92E-02 |   |   |
| TMEM66    | 55.4  | 1.0 | 71.7  | 1.3 | 2.93E-04 | 56.2  | 1.0  | 1.37E-02 |   |   |

|           |      |     |       |     |          |      |      |          |   |   |
|-----------|------|-----|-------|-----|----------|------|------|----------|---|---|
| C1orf103  | 4.5  | 1.0 | 5.8   | 1.3 | 3.14E-03 | 5.2  | 1.2  | 2.44E-01 |   |   |
| C14orf1   | 2.9  | 1.0 | 3.7   | 1.3 | 1.88E-02 | 3.7  | 1.3  | 9.41E-01 |   |   |
| HDAC8     | 3.0  | 1.0 | 3.9   | 1.3 | 2.02E-02 | 3.4  | 1.1  | 8.79E-02 |   |   |
| CDIPT     | 16.8 | 1.0 | 21.7  | 1.3 | 9.86E-04 | 18.1 | 1.1  | 2.04E-02 |   |   |
| INTS1     | 6.3  | 1.0 | 8.2   | 1.3 | 1.81E-03 | 7.2  | 1.1  | 7.98E-02 |   |   |
| CSNK2A2   | 6.7  | 1.0 | 8.6   | 1.3 | 1.99E-03 | 8.2  | 1.2  | 4.49E-01 |   |   |
| JAZF1     | 6.2  | 1.0 | 8.0   | 1.3 | 4.71E-04 | 7.4  | 1.2  | 4.46E-01 |   |   |
| SMAD2     | 2.9  | 1.0 | 3.8   | 1.3 | 1.65E-03 | 3.2  | 1.1  | 1.45E-01 |   |   |
| TMEM150A  | 3.1  | 1.0 | 4.0   | 1.3 | 3.80E-02 | 4.5  | 1.5  | 1.78E-01 |   |   |
| DHX16     | 6.3  | 1.0 | 8.2   | 1.3 | 2.02E-04 | 7.5  | 1.2  | 2.62E-01 |   |   |
| ILKAP     | 6.4  | 1.0 | 8.3   | 1.3 | 3.49E-03 | 7.8  | 1.2  | 3.16E-01 |   |   |
| SF3B2     | 22.0 | 1.0 | 28.4  | 1.3 | 1.89E-02 | 25.9 | 1.2  | 4.26E-01 |   |   |
| DHX8      | 3.6  | 1.0 | 4.7   | 1.3 | 1.29E-03 | 3.9  | 1.1  | 1.35E-01 |   |   |
| FBXO7     | 13.1 | 1.0 | 16.9  | 1.3 | 4.51E-03 | 14.9 | 1.1  | 1.72E-01 |   |   |
| RYBP      | 2.9  | 1.0 | 3.7   | 1.3 | 3.94E-03 | 3.8  | 1.3  | 9.14E-01 |   |   |
| AFTPH     | 2.5  | 1.0 | 3.3   | 1.3 | 2.43E-02 | 2.7  | 1.1  | 2.30E-01 |   |   |
| TCTA      | 6.2  | 1.0 | 8.0   | 1.3 | 3.12E-02 | 6.3  | 1.0  | 3.01E-02 |   |   |
| MPRIIP    | 37.6 | 1.0 | 48.5  | 1.3 | 4.34E-03 | 42.3 | 1.1  | 1.96E-01 |   |   |
| C11orf31  | 6.4  | 1.0 | 8.3   | 1.3 | 1.34E-02 | 7.7  | 1.2  | 4.09E-01 |   |   |
| CCDC115   | 4.7  | 1.0 | 6.0   | 1.3 | 4.74E-02 | 5.2  | 1.1  | 2.64E-01 |   |   |
| ODF2      | 4.5  | 1.0 | 5.8   | 1.3 | 1.69E-02 | 5.1  | 1.1  | 1.43E-01 |   |   |
| C16orf48  | 2.9  | 1.0 | 3.8   | 1.3 | 1.78E-02 | 3.6  | 1.2  | 5.99E-01 |   |   |
| ZNF317    | 2.5  | 1.0 | 3.3   | 1.3 | 4.89E-04 | 2.9  | 1.1  | 1.86E-01 |   |   |
| SLC43A3   | 5.0  | 1.0 | 6.5   | 1.3 | 2.35E-02 | 5.0  | -1.0 | 6.90E-02 |   |   |
| RBP7      | 12.5 | 1.0 | 16.1  | 1.3 | 4.64E-02 | 17.0 | 1.4  | 4.71E-01 |   |   |
| FAM149B1  | 3.1  | 1.0 | 4.0   | 1.3 | 1.07E-02 | 3.6  | 1.2  | 2.21E-01 |   |   |
| AVPI1     | 2.7  | 1.0 | 3.5   | 1.3 | 5.65E-03 | 2.4  | -1.1 | 1.31E-02 |   |   |
| POLR2C    | 14.7 | 1.0 | 18.9  | 1.3 | 8.55E-05 | 15.6 | 1.1  | 9.65E-03 |   |   |
| ARF6      | 5.6  | 1.0 | 7.2   | 1.3 | 1.52E-02 | 6.2  | 1.1  | 1.98E-01 |   |   |
| SS18      | 8.3  | 1.0 | 10.7  | 1.3 | 6.19E-05 | 9.0  | 1.1  | 4.64E-02 |   |   |
| WDR8      | 2.9  | 1.0 | 3.7   | 1.3 | 4.51E-04 | 3.3  | 1.1  | 1.02E-01 |   |   |
| AAAS      | 9.5  | 1.0 | 12.2  | 1.3 | 2.61E-03 | 11.6 | 1.2  | 1.09E-01 |   |   |
| LENG8     | 29.1 | 1.0 | 37.5  | 1.3 | 3.29E-02 | 37.2 | 1.3  | 9.10E-01 |   |   |
| PXK       | 3.0  | 1.0 | 3.9   | 1.3 | 2.19E-02 | 3.3  | 1.1  | 2.52E-01 |   |   |
| QTRT1     | 7.6  | 1.0 | 9.8   | 1.3 | 1.40E-02 | 9.7  | 1.3  | 7.88E-01 |   |   |
| ZC3H4     | 2.6  | 1.0 | 3.3   | 1.3 | 1.48E-02 | 3.1  | 1.2  | 4.83E-01 |   |   |
| CREB3L2   | 4.0  | 1.0 | 5.1   | 1.3 | 1.78E-02 | 4.3  | 1.1  | 3.41E-01 |   |   |
| PITPNB    | 9.2  | 1.0 | 11.9  | 1.3 | 5.40E-03 | 12.2 | 1.3  | 7.92E-01 |   |   |
| POLR2A    | 7.5  | 1.0 | 9.7   | 1.3 | 5.27E-03 | 7.8  | 1.0  | 5.86E-02 |   |   |
| ALG14     | 2.1  | 1.0 | 2.7   | 1.3 | 2.08E-02 | 2.5  | 1.2  | 5.45E-01 |   |   |
| PIGT      | 42.0 | 1.0 | 54.1  | 1.3 | 1.15E-02 | 38.3 | -1.1 | 1.59E-03 | √ | √ |
| RIPK2     | 2.0  | 1.0 | 2.6   | 1.3 | 2.48E-02 | 2.2  | 1.1  | 1.51E-01 |   |   |
| LEMD2     | 6.4  | 1.0 | 8.2   | 1.3 | 7.98E-03 | 8.0  | 1.3  | 7.42E-01 |   |   |
| PEF1      | 12.7 | 1.0 | 16.4  | 1.3 | 2.52E-02 | 15.7 | 1.2  | 6.51E-01 |   |   |
| PSMG2     | 10.4 | 1.0 | 13.4  | 1.3 | 9.03E-03 | 12.9 | 1.2  | 6.51E-01 |   |   |
| SLC38A10  | 8.9  | 1.0 | 11.5  | 1.3 | 2.87E-02 | 9.3  | 1.0  | 1.13E-01 |   |   |
| SPAG16    | 4.6  | 1.0 | 6.0   | 1.3 | 9.80E-03 | 4.7  | 1.0  | 1.12E-02 |   |   |
| UTP14A    | 2.8  | 1.0 | 3.6   | 1.3 | 1.15E-02 | 3.2  | 1.2  | 3.02E-01 |   |   |
| NOC2L     | 8.8  | 1.0 | 11.3  | 1.3 | 1.37E-04 | 10.1 | 1.2  | 5.81E-02 |   |   |
| RNF38     | 4.6  | 1.0 | 5.9   | 1.3 | 1.46E-02 | 5.7  | 1.2  | 7.87E-01 |   |   |
| HDGFRP2   | 5.2  | 1.0 | 6.7   | 1.3 | 2.09E-03 | 6.0  | 1.2  | 1.39E-01 |   |   |
| NRBP2     | 4.8  | 1.0 | 6.1   | 1.3 | 3.78E-02 | 5.7  | 1.2  | 5.31E-01 |   |   |
| TM2D2     | 3.3  | 1.0 | 4.2   | 1.3 | 8.56E-03 | 3.2  | -1.0 | 2.46E-02 |   |   |
| DNAJC30   | 4.1  | 1.0 | 5.3   | 1.3 | 3.61E-03 | 5.3  | 1.3  | 9.40E-01 |   |   |
| GTF2H4    | 3.0  | 1.0 | 3.8   | 1.3 | 1.50E-02 | 3.3  | 1.1  | 1.40E-01 |   |   |
| IFT57     | 3.9  | 1.0 | 5.0   | 1.3 | 2.66E-02 | 4.3  | 1.1  | 2.96E-01 |   |   |
| HSPB11    | 5.1  | 1.0 | 6.6   | 1.3 | 9.53E-04 | 6.5  | 1.3  | 9.60E-01 |   |   |
| FBXO38    | 6.4  | 1.0 | 8.2   | 1.3 | 3.49E-03 | 6.8  | 1.1  | 1.08E-01 |   |   |
| ULK1      | 10.9 | 1.0 | 14.0  | 1.3 | 4.24E-03 | 13.1 | 1.2  | 5.28E-01 |   |   |
| MAP1LC3B2 | 9.5  | 1.0 | 12.2  | 1.3 | 1.91E-02 | 9.6  | 1.0  | 7.26E-03 |   |   |
| OS9       | 29.0 | 1.0 | 37.2  | 1.3 | 2.95E-02 | 30.2 | 1.0  | 1.47E-01 |   |   |
| POLDIP3   | 8.6  | 1.0 | 11.0  | 1.3 | 7.33E-04 | 9.5  | 1.1  | 1.51E-01 |   |   |
| LRCH1     | 2.9  | 1.0 | 3.7   | 1.3 | 4.30E-02 | 3.8  | 1.3  | 7.08E-01 |   |   |
| BAHD1     | 3.3  | 1.0 | 4.2   | 1.3 | 9.80E-03 | 3.6  | 1.1  | 1.23E-01 |   |   |
| TRAF7     | 4.4  | 1.0 | 5.6   | 1.3 | 2.76E-02 | 4.8  | 1.1  | 2.38E-01 |   |   |
| MRFAP1    | 81.4 | 1.0 | 104.4 | 1.3 | 1.85E-04 | 97.2 | 1.2  | 3.23E-01 |   |   |
| PRPSAP2   | 3.4  | 1.0 | 4.3   | 1.3 | 2.39E-02 | 3.7  | 1.1  | 1.51E-01 |   |   |
| UBE2W     | 2.4  | 1.0 | 3.0   | 1.3 | 4.34E-03 | 2.6  | 1.1  | 2.01E-01 |   |   |
| ATP2B1    | 1.7  | 1.0 | 2.2   | 1.3 | 3.98E-02 | 1.5  | -1.1 | 4.68E-02 | √ | √ |
| ZCCHC10   | 2.4  | 1.0 | 3.1   | 1.3 | 8.94E-03 | 3.0  | 1.2  | 5.71E-01 |   |   |
| ENOX2     | 2.7  | 1.0 | 3.5   | 1.3 | 1.49E-02 | 3.0  | 1.1  | 1.80E-01 |   |   |
| PRKAR1B   | 4.1  | 1.0 | 5.2   | 1.3 | 3.97E-02 | 4.7  | 1.2  | 2.52E-01 |   |   |
| TMEM185B  | 4.8  | 1.0 | 6.2   | 1.3 | 1.16E-02 | 5.6  | 1.1  | 2.45E-01 |   |   |
| SCAMP4    | 3.1  | 1.0 | 3.9   | 1.3 | 3.59E-02 | 3.3  | 1.1  | 1.88E-01 |   |   |
| CPNE1     | 8.8  | 1.0 | 11.2  | 1.3 | 2.81E-02 | 10.5 | 1.2  | 3.43E-01 |   |   |
| MAP2K5    | 4.0  | 1.0 | 5.1   | 1.3 | 5.69E-03 | 4.6  | 1.1  | 1.48E-01 |   |   |
| SWAP70    | 5.8  | 1.0 | 7.4   | 1.3 | 3.23E-02 | 6.3  | 1.1  | 3.47E-01 |   |   |
| NR3C1     | 5.5  | 1.0 | 7.0   | 1.3 | 1.73E-02 | 5.2  | -1.1 | 7.03E-02 |   |   |
| FAM160A2  | 3.7  | 1.0 | 4.7   | 1.3 | 7.91E-03 | 4.5  | 1.2  | 5.62E-01 |   |   |
| MGEA5     | 22.8 | 1.0 | 29.2  | 1.3 | 3.45E-03 | 23.8 | 1.0  | 3.91E-02 |   |   |
| AAGAB     | 5.3  | 1.0 | 6.8   | 1.3 | 4.80E-03 | 5.2  | -1.0 | 2.04E-03 |   |   |
| ATXN1L    | 3.6  | 1.0 | 4.6   | 1.3 | 1.15E-02 | 4.7  | 1.3  | 8.28E-01 |   |   |
| EFHD2     | 5.2  | 1.0 | 6.6   | 1.3 | 2.72E-02 | 6.1  | 1.2  | 3.98E-01 |   |   |
| C11orf84  | 2.9  | 1.0 | 3.7   | 1.3 | 2.46E-03 | 3.6  | 1.2  | 6.98E-01 |   |   |

|           |       |     |       |     |          |       |      |          |   |   |
|-----------|-------|-----|-------|-----|----------|-------|------|----------|---|---|
| SBD5      | 77.1  | 1.0 | 98.6  | 1.3 | 5.55E-04 | 95.4  | 1.2  | 6.57E-01 |   |   |
| KCTD7     | 2.6   | 1.0 | 3.3   | 1.3 | 3.71E-03 | 2.8   | 1.1  | 9.32E-02 |   |   |
| KDM6B     | 3.4   | 1.0 | 4.3   | 1.3 | 5.05E-03 | 4.2   | 1.3  | 8.57E-01 |   |   |
| PIBF1     | 2.8   | 1.0 | 3.5   | 1.3 | 3.32E-03 | 3.0   | 1.1  | 8.56E-02 |   |   |
| RAB11B    | 37.0  | 1.0 | 47.4  | 1.3 | 9.31E-04 | 43.9  | 1.2  | 2.23E-01 |   |   |
| NOP56     | 11.3  | 1.0 | 14.4  | 1.3 | 3.82E-03 | 13.3  | 1.2  | 3.03E-01 |   |   |
| HPS4      | 2.3   | 1.0 | 2.9   | 1.3 | 1.48E-02 | 2.7   | 1.2  | 2.72E-01 |   |   |
| VARS2     | 3.2   | 1.0 | 4.1   | 1.3 | 5.01E-03 | 4.2   | 1.3  | 9.47E-01 |   |   |
| C12orf49  | 1.7   | 1.0 | 2.2   | 1.3 | 3.09E-02 | 1.7   | -1.0 | 4.17E-02 | √ | √ |
| ACACA     | 2.0   | 1.0 | 2.6   | 1.3 | 1.26E-02 | 1.7   | -1.2 | 4.98E-03 |   |   |
| SF3B4     | 7.0   | 1.0 | 9.0   | 1.3 | 4.59E-02 | 8.2   | 1.2  | 4.68E-01 |   |   |
| PPM1D     | 1.3   | 1.0 | 1.6   | 1.3 | 2.04E-02 | 1.5   | 1.2  | 5.46E-01 |   |   |
| ZNF415    | 4.2   | 1.0 | 5.4   | 1.3 | 5.19E-03 | 4.7   | 1.1  | 2.39E-01 |   |   |
| RDBP      | 8.7   | 1.0 | 11.2  | 1.3 | 4.51E-03 | 10.7  | 1.2  | 5.52E-01 |   |   |
| SAE1      | 11.1  | 1.0 | 14.2  | 1.3 | 1.85E-03 | 12.1  | 1.1  | 1.21E-01 |   |   |
| SIGMAR1   | 7.1   | 1.0 | 9.1   | 1.3 | 4.39E-02 | 7.2   | 1.0  | 1.02E-01 |   |   |
| FZR1      | 4.1   | 1.0 | 5.2   | 1.3 | 2.72E-03 | 5.1   | 1.2  | 7.33E-01 |   |   |
| HPS5      | 2.1   | 1.0 | 2.6   | 1.3 | 2.83E-02 | 2.0   | -1.0 | 3.21E-02 |   |   |
| GCLC      | 4.3   | 1.0 | 5.5   | 1.3 | 1.28E-03 | 5.3   | 1.2  | 7.48E-01 |   |   |
| GOLGA3    | 4.5   | 1.0 | 5.7   | 1.3 | 1.34E-02 | 4.8   | 1.1  | 1.47E-01 |   |   |
| TCP11L1   | 1.7   | 1.0 | 2.2   | 1.3 | 3.94E-02 | 1.9   | 1.1  | 2.30E-01 |   |   |
| TXLNA     | 4.9   | 1.0 | 6.2   | 1.3 | 8.83E-03 | 5.6   | 1.2  | 2.37E-01 |   |   |
| FBXO21    | 8.8   | 1.0 | 11.3  | 1.3 | 2.82E-02 | 10.5  | 1.2  | 2.65E-01 |   |   |
| TOMM34    | 4.3   | 1.0 | 5.5   | 1.3 | 1.49E-02 | 5.3   | 1.2  | 6.44E-01 |   |   |
| YIPF5     | 3.6   | 1.0 | 4.6   | 1.3 | 1.21E-02 | 3.3   | -1.1 | 2.62E-02 | √ | √ |
| JKAMP     | 6.1   | 1.0 | 7.8   | 1.3 | 3.88E-04 | 6.2   | 1.0  | 1.41E-02 |   |   |
| PELO      | 3.9   | 1.0 | 5.0   | 1.3 | 2.14E-02 | 4.0   | 1.0  | 8.95E-02 |   |   |
| SDCCAG8   | 3.2   | 1.0 | 4.1   | 1.3 | 1.98E-02 | 3.6   | 1.1  | 2.95E-01 |   |   |
| C14orf119 | 4.5   | 1.0 | 5.7   | 1.3 | 2.76E-04 | 4.7   | 1.1  | 1.03E-02 |   |   |
| SMURF2    | 2.0   | 1.0 | 2.5   | 1.3 | 5.57E-03 | 2.1   | 1.1  | 1.36E-01 |   |   |
| UFSP2     | 9.7   | 1.0 | 12.4  | 1.3 | 2.43E-03 | 10.6  | 1.1  | 9.38E-03 |   |   |
| MED29     | 3.8   | 1.0 | 4.9   | 1.3 | 2.26E-03 | 4.1   | 1.1  | 3.79E-02 |   |   |
| NAPG      | 5.8   | 1.0 | 7.4   | 1.3 | 2.82E-03 | 6.6   | 1.1  | 3.49E-01 |   |   |
| VPS33A    | 2.4   | 1.0 | 3.1   | 1.3 | 3.43E-03 | 2.2   | -1.1 | 1.08E-03 | √ | √ |
| COPA      | 17.7  | 1.0 | 22.6  | 1.3 | 7.23E-05 | 19.3  | 1.1  | 3.75E-02 |   |   |
| AAAMP     | 17.8  | 1.0 | 22.7  | 1.3 | 1.06E-03 | 21.7  | 1.2  | 3.86E-01 |   |   |
| EZH1      | 12.0  | 1.0 | 15.3  | 1.3 | 1.26E-03 | 13.0  | 1.1  | 1.00E-01 |   |   |
| C5orf53   | 2.9   | 1.0 | 3.7   | 1.3 | 7.93E-03 | 3.3   | 1.1  | 2.70E-01 |   |   |
| PNRC2     | 22.0  | 1.0 | 28.1  | 1.3 | 8.89E-06 | 22.6  | 1.0  | 1.48E-02 |   |   |
| CLK2      | 6.1   | 1.0 | 7.7   | 1.3 | 1.41E-02 | 7.6   | 1.2  | 7.53E-01 |   |   |
| CDC42     | 38.0  | 1.0 | 48.5  | 1.3 | 3.99E-04 | 42.6  | 1.1  | 1.89E-01 |   |   |
| SNPH      | 2.2   | 1.0 | 2.8   | 1.3 | 2.36E-02 | 2.2   | -1.0 | 2.38E-03 |   |   |
| USP19     | 8.1   | 1.0 | 10.4  | 1.3 | 2.36E-04 | 9.2   | 1.1  | 7.91E-02 |   |   |
| TMEM216   | 1.8   | 1.0 | 2.4   | 1.3 | 4.27E-02 | 2.1   | 1.1  | 2.97E-01 |   |   |
| SLC25A16  | 2.3   | 1.0 | 2.9   | 1.3 | 4.20E-02 | 2.4   | 1.1  | 1.23E-01 |   |   |
| YIPF4     | 8.6   | 1.0 | 10.9  | 1.3 | 1.84E-02 | 9.4   | 1.1  | 2.21E-01 |   |   |
| SIN3A     | 3.6   | 1.0 | 4.6   | 1.3 | 4.10E-03 | 3.5   | -1.0 | 1.22E-02 |   |   |
| HTATSF1   | 25.9  | 1.0 | 33.0  | 1.3 | 1.16E-03 | 29.5  | 1.1  | 1.40E-01 |   |   |
| KHDRBS1   | 17.2  | 1.0 | 21.9  | 1.3 | 9.58E-04 | 18.8  | 1.1  | 9.40E-02 |   |   |
| SORT1     | 17.5  | 1.0 | 22.3  | 1.3 | 4.36E-02 | 22.4  | 1.3  | 9.54E-01 |   |   |
| GPN2      | 3.9   | 1.0 | 4.9   | 1.3 | 4.45E-02 | 4.1   | 1.1  | 7.29E-02 |   |   |
| TAF15     | 21.2  | 1.0 | 27.0  | 1.3 | 1.65E-03 | 25.7  | 1.2  | 6.28E-01 |   |   |
| CNNM4     | 4.5   | 1.0 | 5.8   | 1.3 | 3.59E-02 | 5.6   | 1.2  | 8.20E-01 |   |   |
| UPP1      | 2.8   | 1.0 | 3.6   | 1.3 | 2.61E-02 | 3.9   | 1.4  | 4.42E-01 |   |   |
| CNOT3     | 4.6   | 1.0 | 5.8   | 1.3 | 3.90E-02 | 5.8   | 1.3  | 9.77E-01 |   |   |
| SART3     | 5.2   | 1.0 | 6.6   | 1.3 | 1.58E-03 | 5.9   | 1.1  | 1.14E-01 |   |   |
| PBX2      | 10.7  | 1.0 | 13.6  | 1.3 | 4.75E-03 | 12.2  | 1.1  | 2.25E-01 |   |   |
| UNG       | 6.6   | 1.0 | 8.4   | 1.3 | 1.62E-02 | 8.0   | 1.2  | 6.34E-01 |   |   |
| CRNKL1    | 2.8   | 1.0 | 3.5   | 1.3 | 2.04E-04 | 3.0   | 1.1  | 1.03E-01 |   |   |
| STARD3NL  | 6.5   | 1.0 | 8.3   | 1.3 | 6.71E-03 | 6.9   | 1.1  | 4.77E-02 |   |   |
| MIS12     | 2.0   | 1.0 | 2.6   | 1.3 | 5.56E-03 | 2.3   | 1.1  | 2.15E-01 |   |   |
| RAB40B    | 6.3   | 1.0 | 8.0   | 1.3 | 1.21E-02 | 7.6   | 1.2  | 2.07E-01 |   |   |
| DAZAP2    | 53.8  | 1.0 | 68.4  | 1.3 | 1.90E-03 | 59.5  | 1.1  | 1.34E-01 |   |   |
| OSGEP     | 5.2   | 1.0 | 6.6   | 1.3 | 2.16E-02 | 5.6   | 1.1  | 4.37E-02 |   |   |
| MGAT4B    | 19.4  | 1.0 | 24.6  | 1.3 | 2.10E-02 | 21.9  | 1.1  | 1.46E-01 |   |   |
| LLPH      | 8.5   | 1.0 | 10.8  | 1.3 | 8.00E-03 | 10.0  | 1.2  | 4.81E-01 |   |   |
| SGCG      | 36.3  | 1.0 | 46.1  | 1.3 | 2.26E-02 | 44.4  | 1.2  | 7.48E-01 |   |   |
| EIF4A2    | 130.3 | 1.0 | 165.4 | 1.3 | 1.25E-04 | 153.0 | 1.2  | 2.98E-01 |   |   |
| PWWP2B    | 3.0   | 1.0 | 3.8   | 1.3 | 8.30E-03 | 3.0   | 1.0  | 3.21E-02 |   |   |
| SNHG1     | 3.0   | 1.0 | 3.8   | 1.3 | 3.38E-02 | 3.9   | 1.3  | 7.92E-01 |   |   |
| GTF2E2    | 4.0   | 1.0 | 5.1   | 1.3 | 4.66E-02 | 4.5   | 1.1  | 1.72E-01 |   |   |
| MBD1      | 7.5   | 1.0 | 9.5   | 1.3 | 1.37E-03 | 7.6   | 1.0  | 1.55E-02 |   |   |
| TM9SF4    | 7.8   | 1.0 | 9.9   | 1.3 | 2.56E-03 | 8.6   | 1.1  | 1.72E-01 |   |   |
| GARS      | 11.2  | 1.0 | 14.2  | 1.3 | 2.40E-03 | 12.2  | 1.1  | 3.63E-02 |   |   |
| COPG      | 18.1  | 1.0 | 22.9  | 1.3 | 1.24E-03 | 20.4  | 1.1  | 1.44E-01 |   |   |
| LYPLAL1   | 7.7   | 1.0 | 9.7   | 1.3 | 4.14E-03 | 9.7   | 1.3  | 9.67E-01 |   |   |
| ANP32E    | 6.8   | 1.0 | 8.6   | 1.3 | 3.36E-02 | 7.5   | 1.1  | 2.07E-01 |   |   |
| MBTPS1    | 18.2  | 1.0 | 23.1  | 1.3 | 5.24E-03 | 19.0  | 1.0  | 7.28E-02 |   |   |
| MEN1      | 2.5   | 1.0 | 3.2   | 1.3 | 2.56E-02 | 2.9   | 1.2  | 2.94E-01 |   |   |
| LRRC41    | 9.8   | 1.0 | 12.4  | 1.3 | 3.01E-03 | 11.0  | 1.1  | 1.69E-01 |   |   |
| SCO1      | 10.9  | 1.0 | 13.8  | 1.3 | 3.07E-03 | 11.6  | 1.1  | 4.87E-02 |   |   |
| TMEM55B   | 5.3   | 1.0 | 6.8   | 1.3 | 1.10E-02 | 5.7   | 1.1  | 1.10E-02 |   |   |
| SPECC1L   | 6.1   | 1.0 | 7.8   | 1.3 | 4.42E-03 | 6.2   | 1.0  | 8.65E-02 |   |   |
| MAFG      | 4.0   | 1.0 | 5.1   | 1.3 | 7.95E-03 | 4.2   | 1.0  | 8.47E-02 |   |   |

|           |      |     |      |     |          |      |      |          |   |   |
|-----------|------|-----|------|-----|----------|------|------|----------|---|---|
| SEC61A2   | 2.8  | 1.0 | 3.6  | 1.3 | 1.83E-03 | 3.0  | 1.1  | 6.01E-02 |   |   |
| BYSL      | 2.2  | 1.0 | 2.8  | 1.3 | 7.92E-03 | 2.8  | 1.3  | 8.65E-01 |   |   |
| IVD       | 10.5 | 1.0 | 13.3 | 1.3 | 3.34E-03 | 11.6 | 1.1  | 3.18E-02 |   |   |
| ANKMY2    | 8.5  | 1.0 | 10.7 | 1.3 | 4.66E-03 | 9.0  | 1.1  | 2.41E-02 |   |   |
| SSB       | 18.6 | 1.0 | 23.6 | 1.3 | 1.16E-04 | 20.4 | 1.1  | 1.16E-01 |   |   |
| ZNF211    | 4.2  | 1.0 | 5.3  | 1.3 | 4.82E-03 | 4.8  | 1.1  | 1.21E-01 |   |   |
| EAPP      | 8.3  | 1.0 | 10.6 | 1.3 | 4.58E-02 | 9.8  | 1.2  | 5.96E-01 |   |   |
| CCDC45    | 4.1  | 1.0 | 5.2  | 1.3 | 8.23E-03 | 5.0  | 1.2  | 6.10E-01 |   |   |
| CDK5RAP3  | 16.0 | 1.0 | 20.3 | 1.3 | 2.20E-02 | 19.4 | 1.2  | 5.27E-01 |   |   |
| STX5      | 6.2  | 1.0 | 7.9  | 1.3 | 1.04E-02 | 7.1  | 1.1  | 3.87E-01 |   |   |
| DOCK6     | 6.2  | 1.0 | 7.8  | 1.3 | 4.72E-02 | 8.5  | 1.4  | 4.24E-01 |   |   |
| NFKB1     | 4.2  | 1.0 | 5.3  | 1.3 | 1.58E-02 | 4.6  | 1.1  | 2.77E-01 |   |   |
| ABTB1     | 9.9  | 1.0 | 12.6 | 1.3 | 2.39E-02 | 10.6 | 1.1  | 6.57E-02 |   |   |
| SRA1      | 6.5  | 1.0 | 8.3  | 1.3 | 7.05E-03 | 9.0  | 1.4  | 3.85E-01 |   |   |
| C5orf43   | 3.5  | 1.0 | 4.5  | 1.3 | 3.58E-03 | 3.7  | 1.0  | 7.86E-02 |   |   |
| RNF20     | 10.0 | 1.0 | 12.6 | 1.3 | 2.41E-03 | 9.8  | -1.0 | 1.28E-02 |   |   |
| MAP4K4    | 12.9 | 1.0 | 16.4 | 1.3 | 2.66E-02 | 13.9 | 1.1  | 2.13E-01 |   |   |
| ITFG3     | 24.6 | 1.0 | 31.1 | 1.3 | 2.89E-03 | 24.2 | -1.0 | 1.59E-03 |   |   |
| TMEM175   | 5.3  | 1.0 | 6.7  | 1.3 | 1.13E-02 | 6.3  | 1.2  | 1.42E-01 |   |   |
| C14orf129 | 2.6  | 1.0 | 3.3  | 1.3 | 8.47E-03 | 2.7  | 1.0  | 5.35E-02 |   |   |
| LRRC42    | 3.7  | 1.0 | 4.6  | 1.3 | 1.40E-02 | 3.5  | -1.0 | 2.72E-02 |   |   |
| FDX1L     | 4.4  | 1.0 | 5.6  | 1.3 | 3.36E-02 | 5.5  | 1.2  | 7.44E-01 |   |   |
| GAK       | 4.8  | 1.0 | 6.0  | 1.3 | 1.11E-02 | 6.0  | 1.3  | 9.13E-01 |   |   |
| FIP1L1    | 3.6  | 1.0 | 4.6  | 1.3 | 1.38E-02 | 4.3  | 1.2  | 5.84E-01 |   |   |
| CRAMP1L   | 2.8  | 1.0 | 3.5  | 1.3 | 8.94E-03 | 3.5  | 1.3  | 9.48E-01 |   |   |
| SNRPE     | 5.0  | 1.0 | 6.3  | 1.3 | 9.75E-03 | 5.9  | 1.2  | 5.76E-01 |   |   |
| RUVBL1    | 6.1  | 1.0 | 7.7  | 1.3 | 1.45E-03 | 6.7  | 1.1  | 3.98E-02 |   |   |
| CDK4      | 13.6 | 1.0 | 17.2 | 1.3 | 7.25E-03 | 16.1 | 1.2  | 4.99E-01 |   |   |
| HGS       | 10.1 | 1.0 | 12.8 | 1.3 | 6.78E-03 | 11.4 | 1.1  | 1.47E-01 |   |   |
| LZTS2     | 9.5  | 1.0 | 12.0 | 1.3 | 3.30E-02 | 10.3 | 1.1  | 1.09E-01 |   |   |
| PTPN11    | 19.2 | 1.0 | 24.3 | 1.3 | 3.80E-02 | 19.8 | 1.0  | 1.81E-01 |   |   |
| CSTB      | 48.9 | 1.0 | 61.7 | 1.3 | 2.37E-02 | 57.5 | 1.2  | 3.78E-01 |   |   |
| MAPRE1    | 15.4 | 1.0 | 19.4 | 1.3 | 1.47E-03 | 17.6 | 1.1  | 2.60E-01 |   |   |
| TMEM115   | 7.4  | 1.0 | 9.3  | 1.3 | 8.71E-04 | 7.8  | 1.1  | 4.81E-02 |   |   |
| STK40     | 11.4 | 1.0 | 14.4 | 1.3 | 1.64E-02 | 11.2 | -1.0 | 5.13E-02 |   |   |
| HSPBP1    | 6.5  | 1.0 | 8.2  | 1.3 | 4.49E-03 | 7.8  | 1.2  | 4.77E-01 |   |   |
| MED14     | 3.7  | 1.0 | 4.7  | 1.3 | 4.91E-03 | 3.7  | -1.0 | 7.37E-03 |   |   |
| ATP9A     | 4.8  | 1.0 | 6.1  | 1.3 | 1.09E-02 | 4.4  | -1.1 | 7.05E-04 | ∨ | ∨ |
| TOB1      | 13.2 | 1.0 | 16.7 | 1.3 | 4.98E-03 | 12.3 | -1.1 | 2.38E-02 | ∨ | ∨ |
| NGDN      | 6.9  | 1.0 | 8.7  | 1.3 | 1.26E-02 | 8.4  | 1.2  | 7.68E-01 |   |   |
| CPOX      | 2.9  | 1.0 | 3.7  | 1.3 | 1.27E-02 | 2.8  | -1.0 | 1.90E-02 |   |   |
| XAB2      | 6.1  | 1.0 | 7.7  | 1.3 | 1.36E-02 | 7.6  | 1.2  | 7.70E-01 |   |   |
| MSH2      | 3.3  | 1.0 | 4.2  | 1.3 | 4.86E-02 | 3.4  | 1.0  | 1.19E-02 |   |   |
| PTGES3    | 32.6 | 1.0 | 41.1 | 1.3 | 9.77E-03 | 37.4 | 1.1  | 3.56E-01 |   |   |
| DNAJB2    | 19.6 | 1.0 | 24.7 | 1.3 | 2.51E-03 | 23.7 | 1.2  | 5.33E-01 |   |   |
| SNX17     | 15.1 | 1.0 | 19.1 | 1.3 | 2.76E-02 | 15.8 | 1.0  | 4.71E-02 |   |   |
| SAR1A     | 14.3 | 1.0 | 18.0 | 1.3 | 5.27E-03 | 14.6 | 1.0  | 1.03E-02 |   |   |
| C6orf1    | 6.9  | 1.0 | 8.8  | 1.3 | 1.84E-02 | 9.0  | 1.3  | 7.91E-01 |   |   |
| LRRC47    | 9.3  | 1.0 | 11.8 | 1.3 | 3.98E-04 | 10.0 | 1.1  | 9.27E-03 |   |   |
| KBTBD4    | 3.6  | 1.0 | 4.6  | 1.3 | 9.08E-03 | 3.5  | -1.0 | 1.54E-02 |   |   |
| FAM160B2  | 9.4  | 1.0 | 11.8 | 1.3 | 1.27E-03 | 10.9 | 1.2  | 2.04E-01 |   |   |
| HDAC2     | 2.8  | 1.0 | 3.5  | 1.3 | 1.57E-03 | 3.1  | 1.1  | 2.18E-01 |   |   |
| ARFIP1    | 2.9  | 1.0 | 3.6  | 1.3 | 2.09E-02 | 3.4  | 1.2  | 5.48E-01 |   |   |
| WBSCR16   | 12.1 | 1.0 | 15.2 | 1.3 | 1.90E-03 | 14.7 | 1.2  | 6.15E-01 |   |   |
| GPC1      | 38.8 | 1.0 | 48.8 | 1.3 | 3.70E-02 | 41.9 | 1.1  | 1.77E-01 |   |   |
| C20orf194 | 6.2  | 1.0 | 7.9  | 1.3 | 1.85E-02 | 6.1  | -1.0 | 3.54E-02 |   |   |
| NDEL1     | 7.3  | 1.0 | 9.2  | 1.3 | 1.00E-02 | 10.3 | 1.4  | 3.57E-01 |   |   |
| U2AF2     | 14.3 | 1.0 | 17.9 | 1.3 | 1.57E-03 | 16.9 | 1.2  | 4.15E-01 |   |   |
| OMA1      | 6.9  | 1.0 | 8.7  | 1.3 | 3.27E-02 | 7.0  | 1.0  | 9.34E-02 |   |   |
| GOLIM4    | 17.0 | 1.0 | 21.4 | 1.3 | 1.84E-02 | 17.1 | 1.0  | 7.20E-02 |   |   |
| CCDC9     | 3.9  | 1.0 | 4.9  | 1.3 | 1.66E-02 | 5.0  | 1.3  | 9.14E-01 |   |   |
| ABHD12    | 7.0  | 1.0 | 8.9  | 1.3 | 3.19E-02 | 7.4  | 1.1  | 2.39E-02 |   |   |
| BMPR2     | 4.2  | 1.0 | 5.3  | 1.3 | 2.14E-03 | 4.5  | 1.1  | 1.83E-01 |   |   |
| SRSF8     | 3.3  | 1.0 | 4.1  | 1.3 | 1.01E-02 | 3.0  | -1.1 | 6.35E-03 | ∨ | ∨ |
| CSNK1E    | 16.2 | 1.0 | 20.4 | 1.3 | 3.95E-03 | 20.1 | 1.2  | 8.60E-01 |   |   |
| LYNX1     | 23.0 | 1.0 | 28.9 | 1.3 | 4.69E-02 | 22.7 | -1.0 | 1.29E-02 |   |   |
| IP6K1     | 4.3  | 1.0 | 5.5  | 1.3 | 3.25E-02 | 4.4  | 1.0  | 1.28E-01 |   |   |
| NDOR1     | 2.3  | 1.0 | 2.8  | 1.3 | 1.80E-02 | 2.5  | 1.1  | 1.22E-01 |   |   |
| KDM1B     | 2.4  | 1.0 | 3.0  | 1.3 | 3.94E-02 | 2.4  | -1.0 | 1.45E-02 |   |   |
| KRCC1     | 10.3 | 1.0 | 12.9 | 1.3 | 2.15E-02 | 11.3 | 1.1  | 1.94E-01 |   |   |
| C8orf33   | 4.0  | 1.0 | 5.0  | 1.3 | 1.71E-03 | 3.8  | -1.0 | 3.09E-02 |   |   |
| TOR1AIP1  | 10.0 | 1.0 | 12.5 | 1.3 | 7.36E-03 | 10.4 | 1.0  | 1.27E-01 |   |   |
| TTC23     | 2.2  | 1.0 | 2.7  | 1.3 | 2.07E-02 | 2.5  | 1.1  | 3.48E-01 |   |   |
| SDF4      | 31.6 | 1.0 | 39.7 | 1.3 | 1.94E-03 | 32.6 | 1.0  | 4.21E-02 |   |   |
| SLC2A11   | 2.4  | 1.0 | 3.0  | 1.3 | 4.27E-02 | 2.4  | 1.0  | 1.81E-02 |   |   |
| ATP6V1H   | 10.0 | 1.0 | 12.6 | 1.3 | 2.09E-03 | 10.7 | 1.1  | 7.97E-02 |   |   |
| TMEM219   | 16.8 | 1.0 | 21.1 | 1.3 | 3.92E-02 | 19.9 | 1.2  | 4.62E-01 |   |   |
| ITPA      | 4.0  | 1.0 | 5.0  | 1.3 | 1.85E-02 | 5.1  | 1.3  | 9.10E-01 |   |   |
| PAPD4     | 5.1  | 1.0 | 6.4  | 1.3 | 1.63E-02 | 6.0  | 1.2  | 4.78E-01 |   |   |
| ZNF687    | 2.8  | 1.0 | 3.6  | 1.3 | 2.72E-03 | 2.7  | -1.0 | 1.45E-02 |   |   |
| POLL      | 3.6  | 1.0 | 4.5  | 1.3 | 2.60E-02 | 4.2  | 1.2  | 3.77E-01 |   |   |
| MLL       | 2.5  | 1.0 | 3.2  | 1.3 | 3.20E-02 | 2.3  | -1.1 | 5.86E-03 |   |   |
| RABGEF1   | 3.8  | 1.0 | 4.7  | 1.3 | 2.66E-03 | 3.8  | -1.0 | 2.01E-02 |   |   |
| SUPT5H    | 14.2 | 1.0 | 17.8 | 1.3 | 1.17E-02 | 16.0 | 1.1  | 2.43E-01 |   |   |

|          |       |     |       |     |          |       |      |          |   |   |
|----------|-------|-----|-------|-----|----------|-------|------|----------|---|---|
| RBM42    | 9.3   | 1.0 | 11.7  | 1.3 | 3.51E-03 | 11.5  | 1.2  | 7.66E-01 |   |   |
| UBE2E2   | 6.5   | 1.0 | 8.2   | 1.3 | 7.38E-04 | 7.4   | 1.1  | 1.03E-02 |   |   |
| SGTA     | 20.4  | 1.0 | 25.6  | 1.3 | 1.19E-04 | 23.9  | 1.2  | 2.96E-01 |   |   |
| BCL2L2   | 9.5   | 1.0 | 11.9  | 1.3 | 1.69E-03 | 10.3  | 1.1  | 8.04E-02 |   |   |
| LATS2    | 4.6   | 1.0 | 5.7   | 1.3 | 2.08E-02 | 4.7   | 1.0  | 1.38E-01 |   |   |
| TMEM222  | 7.9   | 1.0 | 10.0  | 1.3 | 4.42E-03 | 8.9   | 1.1  | 3.52E-02 |   |   |
| TRPC4AP  | 11.0  | 1.0 | 13.7  | 1.3 | 5.93E-03 | 12.0  | 1.1  | 9.14E-02 |   |   |
| SNAPC3   | 4.9   | 1.0 | 6.1   | 1.3 | 8.06E-03 | 5.4   | 1.1  | 1.50E-01 |   |   |
| TOMM22   | 13.4  | 1.0 | 16.8  | 1.3 | 2.19E-03 | 16.1  | 1.2  | 5.40E-01 |   |   |
| STX6     | 1.9   | 1.0 | 2.3   | 1.3 | 1.41E-02 | 2.2   | 1.2  | 4.78E-01 |   |   |
| C9orf125 | 10.8  | 1.0 | 13.6  | 1.3 | 1.29E-02 | 9.8   | -1.1 | 1.25E-02 | v | v |
| PDLIM1   | 106.1 | 1.0 | 132.9 | 1.3 | 1.12E-02 | 153.4 | 1.4  | 2.00E-01 |   |   |
| C20orf11 | 4.0   | 1.0 | 5.0   | 1.3 | 5.33E-03 | 4.3   | 1.1  | 8.86E-02 |   |   |
| CDYL     | 3.7   | 1.0 | 4.6   | 1.3 | 6.89E-03 | 3.8   | 1.0  | 1.11E-01 |   |   |
| BLMH     | 4.0   | 1.0 | 5.0   | 1.3 | 4.22E-03 | 4.4   | 1.1  | 1.03E-01 |   |   |
| TARS2    | 7.6   | 1.0 | 9.5   | 1.3 | 1.56E-02 | 7.9   | 1.0  | 2.00E-03 |   |   |
| ZNF282   | 2.3   | 1.0 | 2.9   | 1.3 | 1.19E-02 | 2.8   | 1.2  | 5.87E-01 |   |   |
| RIC8A    | 8.5   | 1.0 | 10.7  | 1.3 | 1.87E-02 | 8.4   | -1.0 | 1.81E-02 |   |   |
| ZNF226   | 3.1   | 1.0 | 3.9   | 1.3 | 3.06E-02 | 4.3   | 1.4  | 4.82E-01 |   |   |
| C9orf23  | 10.8  | 1.0 | 13.6  | 1.3 | 1.45E-03 | 12.6  | 1.2  | 3.90E-01 |   |   |
| YEATS2   | 2.4   | 1.0 | 3.0   | 1.3 | 3.57E-02 | 2.5   | 1.1  | 2.50E-01 |   |   |
| AP4B1    | 3.3   | 1.0 | 4.2   | 1.3 | 1.42E-02 | 3.8   | 1.1  | 1.12E-01 |   |   |
| RNF214   | 4.1   | 1.0 | 5.1   | 1.3 | 3.25E-03 | 4.1   | 1.0  | 3.79E-02 |   |   |
| CTDP1    | 2.1   | 1.0 | 2.6   | 1.3 | 8.81E-03 | 2.5   | 1.2  | 6.42E-01 |   |   |
| VAMP2    | 18.3  | 1.0 | 23.0  | 1.3 | 4.07E-03 | 20.9  | 1.1  | 1.83E-01 |   |   |
| C19orf22 | 5.2   | 1.0 | 6.5   | 1.3 | 2.16E-02 | 6.6   | 1.3  | 7.48E-01 |   |   |
| ZCCHC17  | 9.3   | 1.0 | 11.7  | 1.3 | 6.74E-04 | 10.9  | 1.2  | 4.01E-01 |   |   |
| NISCH    | 9.1   | 1.0 | 11.4  | 1.3 | 2.61E-02 | 11.1  | 1.2  | 7.16E-01 |   |   |
| C1D      | 4.5   | 1.0 | 5.6   | 1.3 | 1.95E-02 | 5.0   | 1.1  | 3.10E-01 |   |   |
| YARS2    | 2.4   | 1.0 | 3.0   | 1.3 | 2.13E-02 | 2.9   | 1.2  | 5.94E-01 |   |   |
| PPIC     | 13.2  | 1.0 | 16.5  | 1.3 | 3.49E-02 | 13.4  | 1.0  | 7.39E-02 |   |   |
| KLC4     | 7.5   | 1.0 | 9.4   | 1.3 | 1.35E-03 | 8.7   | 1.2  | 3.42E-01 |   |   |
| AKAP17A  | 6.8   | 1.0 | 8.5   | 1.2 | 3.83E-02 | 9.1   | 1.3  | 6.09E-01 |   |   |
| TSN      | 7.8   | 1.0 | 9.7   | 1.2 | 1.04E-05 | 8.0   | 1.0  | 1.76E-03 |   |   |
| ZNF462   | 2.2   | 1.0 | 2.7   | 1.2 | 3.25E-02 | 2.2   | 1.0  | 1.04E-01 |   |   |
| SEC22B   | 8.9   | 1.0 | 11.1  | 1.2 | 1.04E-03 | 8.7   | -1.0 | 2.31E-02 |   |   |
| ARMCX1   | 8.5   | 1.0 | 10.7  | 1.2 | 1.13E-02 | 9.0   | 1.1  | 1.73E-03 |   |   |
| SBF1     | 6.7   | 1.0 | 8.3   | 1.2 | 8.31E-04 | 7.2   | 1.1  | 9.71E-02 |   |   |
| TRAPP4   | 8.6   | 1.0 | 10.7  | 1.2 | 1.12E-02 | 9.5   | 1.1  | 2.35E-02 |   |   |
| MEX3C    | 3.1   | 1.0 | 3.8   | 1.2 | 9.13E-03 | 3.5   | 1.1  | 3.26E-01 |   |   |
| WDR48    | 5.7   | 1.0 | 7.1   | 1.2 | 9.31E-04 | 6.4   | 1.1  | 2.82E-01 |   |   |
| HMGCRC   | 1.8   | 1.0 | 2.2   | 1.2 | 1.80E-02 | 2.1   | 1.2  | 3.25E-01 |   |   |
| SGCA     | 40.5  | 1.0 | 50.6  | 1.2 | 3.08E-02 | 43.5  | 1.1  | 3.09E-02 |   |   |
| GFER     | 2.3   | 1.0 | 2.9   | 1.2 | 1.98E-02 | 2.8   | 1.2  | 7.14E-01 |   |   |
| PDRG1    | 3.5   | 1.0 | 4.4   | 1.2 | 7.84E-03 | 4.0   | 1.2  | 2.74E-01 |   |   |
| TMCO1    | 4.7   | 1.0 | 5.9   | 1.2 | 5.85E-04 | 5.0   | 1.1  | 8.27E-02 |   |   |
| UBFD1    | 6.9   | 1.0 | 8.6   | 1.2 | 1.01E-02 | 7.1   | 1.0  | 1.14E-01 |   |   |
| OBSCN    | 25.6  | 1.0 | 32.0  | 1.2 | 4.71E-02 | 36.5  | 1.4  | 3.73E-01 |   |   |
| SSH1     | 4.5   | 1.0 | 5.6   | 1.2 | 1.62E-02 | 4.8   | 1.1  | 2.74E-01 |   |   |
| C21orf59 | 7.9   | 1.0 | 9.8   | 1.2 | 4.62E-03 | 8.5   | 1.1  | 1.19E-01 |   |   |
| TRA2B    | 6.5   | 1.0 | 8.2   | 1.2 | 8.99E-03 | 8.3   | 1.3  | 8.98E-01 |   |   |
| NUDT7    | 11.0  | 1.0 | 13.7  | 1.2 | 2.00E-02 | 12.6  | 1.2  | 3.16E-01 |   |   |
| HSP90AA1 | 122.5 | 1.0 | 152.8 | 1.2 | 1.71E-02 | 136.1 | 1.1  | 4.21E-01 |   |   |
| SMYD5    | 4.3   | 1.0 | 5.4   | 1.2 | 1.30E-02 | 4.7   | 1.1  | 2.02E-01 |   |   |
| VRK3     | 3.9   | 1.0 | 4.9   | 1.2 | 1.30E-02 | 4.8   | 1.2  | 8.78E-01 |   |   |
| FBXW11   | 12.6  | 1.0 | 15.7  | 1.2 | 1.31E-02 | 13.9  | 1.1  | 1.90E-01 |   |   |
| IRF2BP1  | 3.9   | 1.0 | 4.8   | 1.2 | 4.85E-02 | 4.7   | 1.2  | 7.22E-01 |   |   |
| CMTM6    | 3.8   | 1.0 | 4.7   | 1.2 | 2.61E-02 | 4.2   | 1.1  | 3.59E-01 |   |   |
| MAP1S    | 2.7   | 1.0 | 3.4   | 1.2 | 4.55E-02 | 3.0   | 1.1  | 3.80E-01 |   |   |
| DDX27    | 5.6   | 1.0 | 6.9   | 1.2 | 1.53E-02 | 6.9   | 1.2  | 9.49E-01 |   |   |
| RNF170   | 2.1   | 1.0 | 2.6   | 1.2 | 2.55E-02 | 2.0   | -1.0 | 1.51E-02 |   |   |
| ATG13    | 8.4   | 1.0 | 10.4  | 1.2 | 1.65E-02 | 9.1   | 1.1  | 1.86E-01 |   |   |
| PIP4K2B  | 9.1   | 1.0 | 11.4  | 1.2 | 4.78E-03 | 9.4   | 1.0  | 6.02E-02 |   |   |
| SCOC     | 18.9  | 1.0 | 23.5  | 1.2 | 4.37E-03 | 19.4  | 1.0  | 3.04E-02 |   |   |
| ABCD4    | 3.4   | 1.0 | 4.3   | 1.2 | 3.88E-02 | 3.9   | 1.1  | 2.68E-01 |   |   |
| ETV3     | 2.5   | 1.0 | 3.1   | 1.2 | 2.54E-02 | 2.3   | -1.1 | 5.83E-03 |   |   |
| MEF2C    | 5.7   | 1.0 | 7.1   | 1.2 | 4.23E-02 | 6.1   | 1.1  | 2.20E-01 |   |   |
| NECAP1   | 4.7   | 1.0 | 5.8   | 1.2 | 2.05E-03 | 5.6   | 1.2  | 7.18E-01 |   |   |
| IFT27    | 5.5   | 1.0 | 6.9   | 1.2 | 3.75E-02 | 5.9   | 1.1  | 6.48E-02 |   |   |
| PCCB     | 28.4  | 1.0 | 35.3  | 1.2 | 3.73E-02 | 31.6  | 1.1  | 2.47E-01 |   |   |
| CHTOP    | 15.6  | 1.0 | 19.5  | 1.2 | 3.32E-03 | 19.9  | 1.3  | 7.71E-01 |   |   |
| EIF4E    | 4.2   | 1.0 | 5.2   | 1.2 | 1.44E-02 | 4.7   | 1.1  | 3.01E-01 |   |   |
| C18orf8  | 3.8   | 1.0 | 4.8   | 1.2 | 1.37E-02 | 4.0   | 1.0  | 9.76E-02 |   |   |
| PPP3R1   | 6.6   | 1.0 | 8.2   | 1.2 | 2.04E-02 | 6.9   | 1.1  | 8.23E-02 |   |   |
| SUGT1    | 7.0   | 1.0 | 8.7   | 1.2 | 1.10E-03 | 7.9   | 1.1  | 1.42E-01 |   |   |
| BTN2A1   | 5.8   | 1.0 | 7.2   | 1.2 | 3.10E-03 | 6.3   | 1.1  | 2.10E-01 |   |   |
| RBM15B   | 3.6   | 1.0 | 4.5   | 1.2 | 1.17E-02 | 3.9   | 1.1  | 2.32E-01 |   |   |
| VAC14    | 4.2   | 1.0 | 5.3   | 1.2 | 2.30E-02 | 4.5   | 1.1  | 1.45E-01 |   |   |
| NCOA5    | 4.3   | 1.0 | 5.4   | 1.2 | 3.88E-02 | 4.6   | 1.1  | 9.64E-02 |   |   |
| ERC1     | 5.6   | 1.0 | 7.0   | 1.2 | 7.52E-03 | 5.5   | -1.0 | 3.25E-02 |   |   |
| EXOC1    | 6.2   | 1.0 | 7.7   | 1.2 | 1.87E-03 | 6.5   | 1.0  | 9.05E-02 |   |   |
| MKNK1    | 8.3   | 1.0 | 10.3  | 1.2 | 3.65E-02 | 9.8   | 1.2  | 6.25E-01 |   |   |
| HARS2    | 9.5   | 1.0 | 11.9  | 1.2 | 1.83E-03 | 10.2  | 1.1  | 6.57E-02 |   |   |
| GGA1     | 6.6   | 1.0 | 8.2   | 1.2 | 1.51E-02 | 7.5   | 1.1  | 1.55E-01 |   |   |

|          |       |     |       |     |          |       |      |          |   |   |
|----------|-------|-----|-------|-----|----------|-------|------|----------|---|---|
| ANKZF1   | 6.6   | 1.0 | 8.2   | 1.2 | 1.02E-02 | 7.3   | 1.1  | 3.91E-02 |   |   |
| TAF13    | 10.5  | 1.0 | 13.0  | 1.2 | 4.09E-02 | 11.4  | 1.1  | 1.29E-01 |   |   |
| VAMP3    | 22.1  | 1.0 | 27.4  | 1.2 | 1.43E-02 | 22.6  | 1.0  | 7.45E-02 |   |   |
| CHST12   | 3.6   | 1.0 | 4.5   | 1.2 | 4.59E-02 | 3.7   | 1.0  | 5.70E-02 |   |   |
| CREM     | 9.9   | 1.0 | 12.3  | 1.2 | 2.49E-02 | 11.0  | 1.1  | 4.27E-01 |   |   |
| HIATL1   | 4.9   | 1.0 | 6.1   | 1.2 | 3.07E-02 | 5.1   | 1.0  | 1.69E-01 |   |   |
| PAIP2    | 47.1  | 1.0 | 58.6  | 1.2 | 5.10E-04 | 48.4  | 1.0  | 5.13E-02 |   |   |
| GTF2H3   | 2.6   | 1.0 | 3.2   | 1.2 | 4.39E-02 | 2.5   | -1.0 | 1.35E-01 |   |   |
| C2orf64  | 5.8   | 1.0 | 7.2   | 1.2 | 4.39E-02 | 5.9   | 1.0  | 2.60E-02 |   |   |
| SLAH1    | 6.0   | 1.0 | 7.4   | 1.2 | 3.63E-02 | 7.1   | 1.2  | 5.28E-01 |   |   |
| HBP1     | 16.5  | 1.0 | 20.4  | 1.2 | 2.43E-02 | 18.0  | 1.1  | 2.61E-01 |   |   |
| PCNXL3   | 2.4   | 1.0 | 3.0   | 1.2 | 7.82E-03 | 2.5   | 1.0  | 1.40E-01 |   |   |
| CLPTM1L  | 8.9   | 1.0 | 11.0  | 1.2 | 1.30E-02 | 9.0   | 1.0  | 3.03E-02 |   |   |
| KIAA1191 | 18.4  | 1.0 | 22.8  | 1.2 | 7.73E-03 | 21.8  | 1.2  | 6.15E-01 |   |   |
| PDDC1    | 2.6   | 1.0 | 3.2   | 1.2 | 1.07E-02 | 3.0   | 1.2  | 3.60E-01 |   |   |
| RNF4     | 7.5   | 1.0 | 9.3   | 1.2 | 3.23E-03 | 9.1   | 1.2  | 8.57E-01 |   |   |
| ZC3H18   | 4.4   | 1.0 | 5.4   | 1.2 | 1.40E-02 | 5.2   | 1.2  | 6.72E-01 |   |   |
| SLC25A42 | 4.8   | 1.0 | 6.0   | 1.2 | 2.99E-03 | 5.5   | 1.1  | 9.37E-02 |   |   |
| GNB1     | 35.7  | 1.0 | 44.2  | 1.2 | 2.21E-02 | 38.0  | 1.1  | 1.71E-01 |   |   |
| PPP1R7   | 20.5  | 1.0 | 25.4  | 1.2 | 5.91E-04 | 23.9  | 1.2  | 1.72E-01 |   |   |
| NDFIP1   | 15.0  | 1.0 | 18.6  | 1.2 | 8.40E-03 | 14.7  | -1.0 | 2.88E-02 |   |   |
| TCEA1    | 10.6  | 1.0 | 13.2  | 1.2 | 4.47E-02 | 11.2  | 1.1  | 1.86E-01 |   |   |
| USP46    | 5.2   | 1.0 | 6.5   | 1.2 | 4.44E-02 | 5.8   | 1.1  | 4.66E-01 |   |   |
| CYB5B    | 5.5   | 1.0 | 6.8   | 1.2 | 1.91E-03 | 5.8   | 1.1  | 1.84E-02 |   |   |
| WDR43    | 2.7   | 1.0 | 3.3   | 1.2 | 2.72E-02 | 2.9   | 1.1  | 1.85E-01 |   |   |
| RNF25    | 4.3   | 1.0 | 5.4   | 1.2 | 1.89E-02 | 5.2   | 1.2  | 7.24E-01 |   |   |
| RUVBL2   | 14.4  | 1.0 | 17.8  | 1.2 | 2.27E-03 | 17.1  | 1.2  | 4.85E-01 |   |   |
| GOLPH3L  | 2.7   | 1.0 | 3.3   | 1.2 | 1.17E-02 | 2.6   | -1.0 | 8.15E-02 |   |   |
| TPRA1    | 4.9   | 1.0 | 6.1   | 1.2 | 9.06E-03 | 5.5   | 1.1  | 1.70E-01 |   |   |
| ALG13    | 3.9   | 1.0 | 4.8   | 1.2 | 5.64E-05 | 4.2   | 1.1  | 1.19E-01 |   |   |
| FAM120B  | 5.5   | 1.0 | 6.8   | 1.2 | 3.90E-04 | 5.8   | 1.1  | 1.42E-01 |   |   |
| C17orf75 | 4.3   | 1.0 | 5.4   | 1.2 | 8.46E-03 | 4.9   | 1.1  | 3.35E-01 |   |   |
| TAF7     | 37.4  | 1.0 | 46.3  | 1.2 | 5.23E-05 | 42.5  | 1.1  | 2.27E-01 |   |   |
| MOB2     | 10.4  | 1.0 | 12.8  | 1.2 | 1.06E-02 | 11.9  | 1.2  | 3.65E-01 |   |   |
| GNB2     | 26.0  | 1.0 | 32.2  | 1.2 | 3.40E-02 | 28.4  | 1.1  | 1.63E-01 |   |   |
| INTS5    | 2.2   | 1.0 | 2.7   | 1.2 | 1.18E-03 | 2.2   | 1.0  | 3.55E-02 |   |   |
| NSF      | 3.7   | 1.0 | 4.5   | 1.2 | 1.90E-02 | 3.8   | 1.0  | 1.59E-01 |   |   |
| GGA3     | 4.8   | 1.0 | 5.9   | 1.2 | 5.17E-03 | 5.1   | 1.1  | 1.03E-01 |   |   |
| LRRC14   | 2.7   | 1.0 | 3.3   | 1.2 | 6.10E-03 | 2.7   | 1.0  | 1.52E-02 |   |   |
| ZNF274   | 6.7   | 1.0 | 8.2   | 1.2 | 4.49E-03 | 7.0   | 1.1  | 4.18E-02 |   |   |
| NCL      | 52.8  | 1.0 | 65.4  | 1.2 | 9.07E-04 | 60.6  | 1.1  | 4.00E-01 |   |   |
| SAFB     | 14.8  | 1.0 | 18.3  | 1.2 | 8.27E-03 | 16.9  | 1.1  | 2.82E-01 |   |   |
| MED27    | 4.7   | 1.0 | 5.8   | 1.2 | 8.06E-03 | 5.2   | 1.1  | 1.68E-01 |   |   |
| CEP57    | 4.8   | 1.0 | 5.9   | 1.2 | 1.51E-03 | 5.2   | 1.1  | 1.07E-01 |   |   |
| CABIN1   | 5.1   | 1.0 | 6.3   | 1.2 | 2.46E-02 | 5.2   | 1.0  | 7.09E-02 |   |   |
| MAN2C1   | 16.6  | 1.0 | 20.6  | 1.2 | 2.86E-02 | 21.7  | 1.3  | 3.44E-01 |   |   |
| TAPBP    | 8.9   | 1.0 | 11.0  | 1.2 | 1.69E-02 | 8.1   | -1.1 | 1.26E-02 | ∨ | ∨ |
| GRN      | 35.2  | 1.0 | 43.6  | 1.2 | 4.24E-02 | 32.6  | -1.1 | 3.62E-02 | ∨ | ∨ |
| FBXO9    | 5.9   | 1.0 | 7.3   | 1.2 | 1.66E-02 | 5.3   | -1.1 | 2.29E-03 |   |   |
| ATG4B    | 6.7   | 1.0 | 8.3   | 1.2 | 6.21E-03 | 8.0   | 1.2  | 4.70E-01 |   |   |
| MEPCE    | 6.2   | 1.0 | 7.7   | 1.2 | 7.66E-03 | 8.6   | 1.4  | 4.42E-01 |   |   |
| CEP68    | 4.7   | 1.0 | 5.8   | 1.2 | 4.43E-03 | 4.6   | -1.0 | 3.16E-02 |   |   |
| CUL4B    | 4.3   | 1.0 | 5.3   | 1.2 | 3.86E-02 | 4.9   | 1.1  | 4.64E-01 |   |   |
| AMBRA1   | 2.5   | 1.0 | 3.0   | 1.2 | 1.74E-02 | 2.8   | 1.1  | 4.72E-01 |   |   |
| ARF1     | 94.6  | 1.0 | 116.9 | 1.2 | 1.27E-04 | 105.9 | 1.1  | 5.23E-02 |   |   |
| BPNT1    | 2.7   | 1.0 | 3.3   | 1.2 | 9.93E-04 | 2.9   | 1.1  | 1.83E-01 |   |   |
| C17orf85 | 3.8   | 1.0 | 4.7   | 1.2 | 1.45E-02 | 4.5   | 1.2  | 4.55E-01 |   |   |
| TBCC     | 3.8   | 1.0 | 4.7   | 1.2 | 2.39E-03 | 3.4   | -1.1 | 3.60E-03 |   |   |
| TBC1D16  | 2.5   | 1.0 | 3.1   | 1.2 | 3.67E-02 | 2.3   | -1.1 | 7.11E-02 |   |   |
| RPL26L1  | 9.6   | 1.0 | 11.9  | 1.2 | 3.39E-03 | 11.0  | 1.1  | 1.98E-01 |   |   |
| EIF4A3   | 8.0   | 1.0 | 9.8   | 1.2 | 2.96E-03 | 9.3   | 1.2  | 5.81E-01 |   |   |
| GOLT1B   | 4.1   | 1.0 | 5.0   | 1.2 | 8.90E-03 | 4.5   | 1.1  | 3.05E-01 |   |   |
| NPM1     | 76.4  | 1.0 | 94.4  | 1.2 | 9.19E-03 | 96.9  | 1.3  | 7.88E-01 |   |   |
| TMEM184B | 9.7   | 1.0 | 12.0  | 1.2 | 4.80E-02 | 10.9  | 1.1  | 4.41E-01 |   |   |
| SAP18    | 30.0  | 1.0 | 37.0  | 1.2 | 1.58E-03 | 36.6  | 1.2  | 8.82E-01 |   |   |
| MYL12B   | 99.6  | 1.0 | 122.9 | 1.2 | 1.23E-02 | 112.1 | 1.1  | 2.52E-01 |   |   |
| SLC39A6  | 2.9   | 1.0 | 3.6   | 1.2 | 2.90E-02 | 3.1   | 1.1  | 3.04E-01 |   |   |
| SUDS3    | 4.7   | 1.0 | 5.8   | 1.2 | 1.97E-03 | 5.2   | 1.1  | 2.35E-01 |   |   |
| ARHGEF9  | 7.6   | 1.0 | 9.3   | 1.2 | 4.26E-03 | 7.5   | -1.0 | 7.61E-03 |   |   |
| CSNK1D   | 13.8  | 1.0 | 17.0  | 1.2 | 1.41E-03 | 16.0  | 1.2  | 3.47E-01 |   |   |
| TOM1L2   | 38.3  | 1.0 | 47.2  | 1.2 | 2.45E-03 | 42.8  | 1.1  | 1.08E-01 |   |   |
| PYCR2    | 18.4  | 1.0 | 22.7  | 1.2 | 1.70E-04 | 18.6  | 1.0  | 3.65E-03 |   |   |
| FAF2     | 3.8   | 1.0 | 4.7   | 1.2 | 2.79E-02 | 4.1   | 1.1  | 2.45E-01 |   |   |
| AXIN1    | 2.8   | 1.0 | 3.5   | 1.2 | 1.72E-02 | 3.4   | 1.2  | 9.24E-01 |   |   |
| BBS2     | 11.5  | 1.0 | 14.2  | 1.2 | 3.76E-03 | 12.6  | 1.1  | 5.45E-02 |   |   |
| BCAP31   | 29.0  | 1.0 | 35.8  | 1.2 | 1.28E-02 | 30.5  | 1.0  | 7.63E-02 |   |   |
| LAMB2    | 65.4  | 1.0 | 80.7  | 1.2 | 4.25E-03 | 67.7  | 1.0  | 3.13E-02 |   |   |
| ZFYVE20  | 2.9   | 1.0 | 3.6   | 1.2 | 3.12E-03 | 2.7   | -1.1 | 5.95E-03 |   |   |
| ERICH1   | 3.3   | 1.0 | 4.0   | 1.2 | 1.56E-02 | 3.9   | 1.2  | 6.70E-01 |   |   |
| EIF4G2   | 120.6 | 1.0 | 148.6 | 1.2 | 1.88E-03 | 122.0 | 1.0  | 5.86E-02 |   |   |
| IFNGR2   | 8.0   | 1.0 | 9.9   | 1.2 | 2.56E-02 | 8.0   | 1.0  | 1.10E-01 |   |   |
| GANAB    | 25.2  | 1.0 | 31.1  | 1.2 | 2.24E-02 | 25.6  | 1.0  | 9.67E-02 |   |   |
| GPN1     | 6.2   | 1.0 | 7.6   | 1.2 | 1.58E-02 | 6.0   | -1.0 | 1.96E-02 |   |   |
| YWHAZ    | 36.4  | 1.0 | 44.8  | 1.2 | 1.17E-02 | 37.8  | 1.0  | 1.38E-01 |   |   |

|          |       |     |       |     |          |       |      |          |  |  |
|----------|-------|-----|-------|-----|----------|-------|------|----------|--|--|
| VEZT     | 7.9   | 1.0 | 9.7   | 1.2 | 3.20E-03 | 8.1   | 1.0  | 5.69E-02 |  |  |
| ANAPC4   | 3.6   | 1.0 | 4.4   | 1.2 | 1.53E-02 | 3.9   | 1.1  | 3.51E-02 |  |  |
| C2orf29  | 9.0   | 1.0 | 11.1  | 1.2 | 8.80E-03 | 10.7  | 1.2  | 8.01E-01 |  |  |
| KLHL18   | 2.3   | 1.0 | 2.8   | 1.2 | 3.67E-03 | 2.4   | 1.0  | 1.15E-01 |  |  |
| BCAS2    | 10.6  | 1.0 | 13.1  | 1.2 | 1.76E-03 | 11.3  | 1.1  | 4.83E-02 |  |  |
| CAND1    | 3.4   | 1.0 | 4.2   | 1.2 | 1.75E-02 | 3.5   | 1.0  | 1.26E-01 |  |  |
| YAF2     | 5.0   | 1.0 | 6.1   | 1.2 | 4.36E-02 | 6.3   | 1.3  | 7.31E-01 |  |  |
| RNF44    | 4.3   | 1.0 | 5.3   | 1.2 | 1.20E-02 | 4.9   | 1.1  | 2.71E-01 |  |  |
| SERTAD2  | 3.2   | 1.0 | 3.9   | 1.2 | 1.52E-02 | 3.0   | -1.1 | 3.62E-02 |  |  |
| PPIE     | 8.8   | 1.0 | 10.8  | 1.2 | 2.29E-03 | 9.3   | 1.1  | 2.91E-02 |  |  |
| STX7     | 7.5   | 1.0 | 9.2   | 1.2 | 7.96E-03 | 7.7   | 1.0  | 8.37E-02 |  |  |
| EIF4G3   | 8.1   | 1.0 | 9.9   | 1.2 | 3.51E-02 | 8.0   | -1.0 | 1.02E-01 |  |  |
| KCTD5    | 3.2   | 1.0 | 3.9   | 1.2 | 2.99E-02 | 3.5   | 1.1  | 2.57E-01 |  |  |
| ANKRD54  | 2.3   | 1.0 | 2.8   | 1.2 | 3.34E-02 | 2.1   | -1.1 | 9.64E-03 |  |  |
| ELOVL1   | 9.0   | 1.0 | 11.1  | 1.2 | 4.80E-02 | 9.0   | -1.0 | 6.18E-02 |  |  |
| LMBR1L   | 4.4   | 1.0 | 5.4   | 1.2 | 1.30E-02 | 5.3   | 1.2  | 8.01E-01 |  |  |
| ST3GAL3  | 6.7   | 1.0 | 8.2   | 1.2 | 2.59E-02 | 7.3   | 1.1  | 2.89E-03 |  |  |
| WDR85    | 4.0   | 1.0 | 4.9   | 1.2 | 4.19E-02 | 5.0   | 1.2  | 7.78E-01 |  |  |
| ELMOD2   | 2.5   | 1.0 | 3.0   | 1.2 | 9.65E-04 | 2.3   | -1.1 | 6.20E-04 |  |  |
| CHMP6    | 5.7   | 1.0 | 7.0   | 1.2 | 6.49E-03 | 6.2   | 1.1  | 1.06E-01 |  |  |
| DEF8     | 7.4   | 1.0 | 9.1   | 1.2 | 2.42E-03 | 7.3   | -1.0 | 1.68E-02 |  |  |
| KLHL20   | 3.6   | 1.0 | 4.4   | 1.2 | 1.28E-02 | 3.5   | -1.0 | 5.71E-02 |  |  |
| BBS4     | 3.9   | 1.0 | 4.8   | 1.2 | 3.01E-02 | 4.2   | 1.1  | 1.10E-01 |  |  |
| TPRG1L   | 11.6  | 1.0 | 14.3  | 1.2 | 1.66E-03 | 12.0  | 1.0  | 5.35E-02 |  |  |
| PHF21A   | 3.6   | 1.0 | 4.5   | 1.2 | 1.95E-02 | 3.9   | 1.1  | 1.91E-01 |  |  |
| ZNF513   | 2.8   | 1.0 | 3.5   | 1.2 | 2.02E-02 | 3.3   | 1.2  | 5.26E-01 |  |  |
| SNRPA    | 8.1   | 1.0 | 9.9   | 1.2 | 4.74E-02 | 10.0  | 1.2  | 9.20E-01 |  |  |
| IPPK     | 2.1   | 1.0 | 2.6   | 1.2 | 4.49E-02 | 2.2   | 1.0  | 1.23E-01 |  |  |
| EIF1     | 193.8 | 1.0 | 238.0 | 1.2 | 4.32E-04 | 209.4 | 1.1  | 1.80E-01 |  |  |
| PHF8     | 2.8   | 1.0 | 3.5   | 1.2 | 4.77E-02 | 3.4   | 1.2  | 7.68E-01 |  |  |
| SF3A3    | 7.6   | 1.0 | 9.4   | 1.2 | 3.61E-03 | 8.6   | 1.1  | 3.24E-01 |  |  |
| HDGFRP3  | 10.0  | 1.0 | 12.2  | 1.2 | 5.01E-03 | 11.7  | 1.2  | 6.76E-01 |  |  |
| FAM174A  | 6.7   | 1.0 | 8.2   | 1.2 | 3.57E-03 | 7.5   | 1.1  | 2.42E-02 |  |  |
| RAB6A    | 24.3  | 1.0 | 29.8  | 1.2 | 5.26E-03 | 26.5  | 1.1  | 2.46E-01 |  |  |
| XPO1     | 12.5  | 1.0 | 15.4  | 1.2 | 2.72E-02 | 13.4  | 1.1  | 1.95E-01 |  |  |
| TSSC4    | 5.9   | 1.0 | 7.3   | 1.2 | 1.81E-02 | 6.6   | 1.1  | 3.11E-01 |  |  |
| FBXO44   | 3.1   | 1.0 | 3.8   | 1.2 | 3.76E-02 | 3.4   | 1.1  | 1.40E-01 |  |  |
| MOAP1    | 5.0   | 1.0 | 6.1   | 1.2 | 1.14E-02 | 4.9   | -1.0 | 2.25E-04 |  |  |
| TXNDC12  | 7.8   | 1.0 | 9.6   | 1.2 | 1.25E-02 | 7.7   | -1.0 | 2.64E-02 |  |  |
| SF1      | 26.0  | 1.0 | 31.9  | 1.2 | 4.33E-02 | 31.0  | 1.2  | 7.73E-01 |  |  |
| PNO1     | 2.4   | 1.0 | 3.0   | 1.2 | 1.01E-02 | 2.8   | 1.2  | 5.15E-01 |  |  |
| ZFAND6   | 20.8  | 1.0 | 25.6  | 1.2 | 6.59E-04 | 23.1  | 1.1  | 2.38E-01 |  |  |
| KDM3B    | 7.6   | 1.0 | 9.4   | 1.2 | 6.42E-04 | 8.1   | 1.1  | 7.72E-02 |  |  |
| C20orf4  | 5.2   | 1.0 | 6.4   | 1.2 | 2.78E-03 | 5.6   | 1.1  | 1.30E-01 |  |  |
| BRE      | 18.1  | 1.0 | 22.2  | 1.2 | 9.44E-03 | 18.9  | 1.0  | 2.83E-02 |  |  |
| DPCD     | 7.3   | 1.0 | 9.0   | 1.2 | 3.99E-03 | 7.2   | -1.0 | 1.46E-02 |  |  |
| ZNF766   | 2.4   | 1.0 | 2.9   | 1.2 | 2.12E-03 | 2.4   | 1.0  | 4.81E-02 |  |  |
| DHPS     | 13.8  | 1.0 | 16.9  | 1.2 | 1.00E-03 | 14.8  | 1.1  | 6.83E-02 |  |  |
| NEU1     | 6.6   | 1.0 | 8.1   | 1.2 | 3.72E-04 | 7.1   | 1.1  | 6.67E-02 |  |  |
| EIF2D    | 9.3   | 1.0 | 11.4  | 1.2 | 5.24E-03 | 10.7  | 1.1  | 2.57E-01 |  |  |
| WRB      | 6.5   | 1.0 | 8.0   | 1.2 | 2.24E-02 | 6.8   | 1.1  | 9.65E-02 |  |  |
| VEGFB    | 55.5  | 1.0 | 68.0  | 1.2 | 4.03E-02 | 57.2  | 1.0  | 6.49E-02 |  |  |
| TTC35    | 17.3  | 1.0 | 21.2  | 1.2 | 8.04E-03 | 17.4  | 1.0  | 4.22E-02 |  |  |
| SF3A1    | 8.2   | 1.0 | 10.0  | 1.2 | 2.60E-02 | 8.7   | 1.1  | 2.90E-01 |  |  |
| CPSF7    | 11.4  | 1.0 | 14.0  | 1.2 | 1.11E-02 | 13.6  | 1.2  | 8.08E-01 |  |  |
| PARN     | 5.6   | 1.0 | 6.9   | 1.2 | 3.19E-03 | 5.9   | 1.1  | 1.20E-01 |  |  |
| HSF4     | 4.3   | 1.0 | 5.2   | 1.2 | 3.77E-02 | 5.2   | 1.2  | 9.17E-01 |  |  |
| SMEK2    | 4.6   | 1.0 | 5.6   | 1.2 | 7.99E-03 | 4.9   | 1.1  | 1.90E-01 |  |  |
| TBCA     | 39.0  | 1.0 | 47.8  | 1.2 | 9.03E-03 | 49.8  | 1.3  | 5.60E-01 |  |  |
| KIAA1967 | 9.1   | 1.0 | 11.1  | 1.2 | 3.34E-03 | 10.0  | 1.1  | 2.09E-01 |  |  |
| PPP1R2   | 7.3   | 1.0 | 9.0   | 1.2 | 1.18E-04 | 7.2   | -1.0 | 1.18E-02 |  |  |
| DDX28    | 2.6   | 1.0 | 3.2   | 1.2 | 4.51E-02 | 2.7   | 1.1  | 5.53E-02 |  |  |
| SRSF4    | 10.5  | 1.0 | 12.9  | 1.2 | 2.68E-02 | 12.7  | 1.2  | 8.13E-01 |  |  |
| PBX3     | 11.8  | 1.0 | 14.4  | 1.2 | 2.86E-02 | 12.4  | 1.1  | 1.03E-01 |  |  |
| HIF1AN   | 5.3   | 1.0 | 6.5   | 1.2 | 2.05E-03 | 5.2   | -1.0 | 5.38E-02 |  |  |
| SNAP23   | 11.1  | 1.0 | 13.6  | 1.2 | 9.77E-03 | 12.7  | 1.1  | 4.06E-01 |  |  |
| CTNNB1   | 36.7  | 1.0 | 44.9  | 1.2 | 3.00E-03 | 37.0  | 1.0  | 5.41E-02 |  |  |
| WDR24    | 2.3   | 1.0 | 2.8   | 1.2 | 4.99E-03 | 2.4   | 1.1  | 1.06E-01 |  |  |
| ACIN1    | 12.2  | 1.0 | 14.9  | 1.2 | 1.43E-02 | 14.6  | 1.2  | 8.07E-01 |  |  |
| PDCD7    | 2.6   | 1.0 | 3.2   | 1.2 | 1.62E-02 | 2.7   | 1.1  | 1.61E-01 |  |  |
| PPP2R5B  | 5.4   | 1.0 | 6.6   | 1.2 | 1.49E-02 | 5.8   | 1.1  | 4.89E-02 |  |  |
| ZNF187   | 3.1   | 1.0 | 3.8   | 1.2 | 2.24E-02 | 3.3   | 1.1  | 2.32E-01 |  |  |
| RBM39    | 27.1  | 1.0 | 33.1  | 1.2 | 4.04E-03 | 34.9  | 1.3  | 5.05E-01 |  |  |
| SNW1     | 13.3  | 1.0 | 16.3  | 1.2 | 2.08E-03 | 14.0  | 1.1  | 9.15E-02 |  |  |
| TAF9B    | 5.2   | 1.0 | 6.3   | 1.2 | 2.59E-02 | 5.2   | -1.0 | 7.89E-02 |  |  |
| MAP2K7   | 4.9   | 1.0 | 6.0   | 1.2 | 5.37E-03 | 5.5   | 1.1  | 1.14E-01 |  |  |
| VPS72    | 9.4   | 1.0 | 11.5  | 1.2 | 2.93E-03 | 11.0  | 1.2  | 4.94E-01 |  |  |
| SMNDC1   | 6.2   | 1.0 | 7.6   | 1.2 | 2.04E-02 | 7.1   | 1.1  | 4.76E-01 |  |  |
| METTL9   | 7.8   | 1.0 | 9.5   | 1.2 | 9.93E-03 | 8.0   | 1.0  | 9.51E-02 |  |  |
| CETN3    | 5.8   | 1.0 | 7.1   | 1.2 | 2.85E-02 | 6.4   | 1.1  | 3.22E-01 |  |  |
| LEPROTL1 | 10.2  | 1.0 | 12.4  | 1.2 | 7.45E-03 | 9.5   | -1.1 | 2.90E-02 |  |  |
| HEATR6   | 2.6   | 1.0 | 3.2   | 1.2 | 1.00E-02 | 2.5   | -1.0 | 8.66E-02 |  |  |
| PPARD    | 4.1   | 1.0 | 5.0   | 1.2 | 2.64E-03 | 4.7   | 1.1  | 3.56E-01 |  |  |
| TCEAL8   | 8.5   | 1.0 | 10.4  | 1.2 | 2.40E-02 | 8.4   | -1.0 | 8.62E-02 |  |  |



|           |      |     |      |     |          |      |      |          |  |
|-----------|------|-----|------|-----|----------|------|------|----------|--|
| PERP      | 14.5 | 1.0 | 17.8 | 1.2 | 1.12E-02 | 15.4 | 1.1  | 3.35E-02 |  |
| TBC1D17   | 12.4 | 1.0 | 15.2 | 1.2 | 3.36E-02 | 14.4 | 1.2  | 5.25E-01 |  |
| AATF      | 7.6  | 1.0 | 9.2  | 1.2 | 3.60E-02 | 7.9  | 1.0  | 2.06E-01 |  |
| B3GALNT2  | 3.5  | 1.0 | 4.2  | 1.2 | 4.14E-02 | 3.9  | 1.1  | 4.01E-01 |  |
| DHX40     | 4.9  | 1.0 | 6.0  | 1.2 | 1.85E-03 | 4.9  | 1.0  | 3.81E-02 |  |
| GALNT11   | 7.8  | 1.0 | 9.6  | 1.2 | 3.05E-02 | 8.2  | 1.1  | 1.41E-01 |  |
| RCN2      | 10.5 | 1.0 | 12.8 | 1.2 | 1.25E-02 | 9.8  | -1.1 | 1.13E-02 |  |
| ABI1      | 4.7  | 1.0 | 5.7  | 1.2 | 2.83E-02 | 5.4  | 1.1  | 6.49E-01 |  |
| FAM134C   | 3.8  | 1.0 | 4.7  | 1.2 | 2.49E-02 | 4.5  | 1.2  | 6.29E-01 |  |
| MAGED1    | 19.0 | 1.0 | 23.1 | 1.2 | 1.83E-02 | 19.8 | 1.0  | 8.35E-02 |  |
| RNF123    | 7.3  | 1.0 | 8.9  | 1.2 | 5.85E-05 | 7.9  | 1.1  | 7.41E-02 |  |
| SCAF4     | 3.7  | 1.0 | 4.5  | 1.2 | 7.50E-03 | 4.2  | 1.1  | 6.08E-01 |  |
| SNRNP40   | 4.9  | 1.0 | 6.0  | 1.2 | 2.06E-02 | 5.2  | 1.1  | 1.42E-01 |  |
| RNPS1     | 14.7 | 1.0 | 18.0 | 1.2 | 2.79E-04 | 16.9 | 1.1  | 1.16E-01 |  |
| NT5C2     | 5.4  | 1.0 | 6.6  | 1.2 | 2.78E-02 | 6.9  | 1.3  | 6.68E-01 |  |
| RP9       | 5.4  | 1.0 | 6.6  | 1.2 | 2.62E-02 | 5.9  | 1.1  | 2.59E-01 |  |
| DET1      | 2.4  | 1.0 | 3.0  | 1.2 | 3.42E-02 | 2.9  | 1.2  | 7.75E-01 |  |
| SKP1      | 81.8 | 1.0 | 99.8 | 1.2 | 9.82E-05 | 85.8 | 1.0  | 2.17E-02 |  |
| C11orf10  | 32.5 | 1.0 | 39.6 | 1.2 | 7.26E-03 | 36.4 | 1.1  | 2.03E-01 |  |
| DDX23     | 10.9 | 1.0 | 13.2 | 1.2 | 2.05E-02 | 11.2 | 1.0  | 1.56E-01 |  |
| XPO7      | 8.7  | 1.0 | 10.7 | 1.2 | 3.71E-03 | 9.0  | 1.0  | 1.37E-01 |  |
| TAOK2     | 9.0  | 1.0 | 10.9 | 1.2 | 1.08E-03 | 8.6  | -1.0 | 2.13E-02 |  |
| SURF6     | 5.6  | 1.0 | 6.9  | 1.2 | 8.03E-03 | 6.5  | 1.2  | 4.99E-01 |  |
| C6orf35   | 3.4  | 1.0 | 4.2  | 1.2 | 5.11E-03 | 3.5  | 1.0  | 9.21E-03 |  |
| BRD2      | 22.9 | 1.0 | 27.9 | 1.2 | 4.33E-02 | 27.5 | 1.2  | 9.01E-01 |  |
| PPP1R12C  | 43.3 | 1.0 | 52.8 | 1.2 | 8.60E-03 | 50.0 | 1.2  | 5.12E-01 |  |
| TTLL5     | 2.3  | 1.0 | 2.8  | 1.2 | 3.24E-02 | 2.3  | 1.0  | 6.21E-02 |  |
| APEX2     | 4.0  | 1.0 | 4.8  | 1.2 | 1.08E-02 | 4.3  | 1.1  | 1.30E-01 |  |
| CARS      | 4.1  | 1.0 | 5.0  | 1.2 | 2.88E-02 | 4.7  | 1.1  | 4.63E-01 |  |
| MAK16     | 2.0  | 1.0 | 2.5  | 1.2 | 9.89E-03 | 2.5  | 1.2  | 8.89E-01 |  |
| NSFL1C    | 10.5 | 1.0 | 12.8 | 1.2 | 6.19E-03 | 11.7 | 1.1  | 2.09E-01 |  |
| FDFT1     | 19.1 | 1.0 | 23.3 | 1.2 | 1.74E-02 | 19.3 | 1.0  | 3.47E-02 |  |
| FNDC3A    | 4.4  | 1.0 | 5.4  | 1.2 | 3.17E-02 | 4.1  | -1.1 | 2.59E-02 |  |
| GRINA     | 21.8 | 1.0 | 26.5 | 1.2 | 2.38E-02 | 24.2 | 1.1  | 4.36E-01 |  |
| KDM2A     | 7.6  | 1.0 | 9.3  | 1.2 | 2.51E-02 | 8.2  | 1.1  | 2.61E-01 |  |
| STK35     | 3.4  | 1.0 | 4.2  | 1.2 | 8.06E-03 | 3.5  | 1.0  | 1.09E-02 |  |
| SNRPB2    | 6.2  | 1.0 | 7.5  | 1.2 | 3.81E-05 | 6.9  | 1.1  | 1.40E-01 |  |
| SUMO1     | 19.5 | 1.0 | 23.8 | 1.2 | 1.28E-02 | 21.5 | 1.1  | 2.94E-01 |  |
| LSM7      | 9.7  | 1.0 | 11.9 | 1.2 | 4.14E-02 | 12.2 | 1.2  | 7.31E-01 |  |
| PSMC4     | 20.3 | 1.0 | 24.7 | 1.2 | 8.97E-04 | 22.1 | 1.1  | 1.03E-01 |  |
| ARMCX3    | 6.8  | 1.0 | 8.3  | 1.2 | 5.22E-04 | 7.1  | 1.0  | 4.37E-02 |  |
| FTSJ2     | 3.6  | 1.0 | 4.4  | 1.2 | 1.67E-02 | 3.6  | 1.0  | 8.61E-02 |  |
| EXOSC8    | 5.0  | 1.0 | 6.1  | 1.2 | 6.61E-04 | 6.3  | 1.3  | 4.64E-01 |  |
| CANT1     | 4.0  | 1.0 | 4.9  | 1.2 | 3.79E-03 | 3.9  | -1.0 | 5.16E-03 |  |
| KDM4C     | 2.6  | 1.0 | 3.1  | 1.2 | 2.14E-02 | 2.5  | -1.0 | 4.58E-02 |  |
| RAB28     | 7.3  | 1.0 | 8.9  | 1.2 | 1.86E-02 | 8.4  | 1.1  | 2.37E-01 |  |
| GSS       | 6.5  | 1.0 | 7.9  | 1.2 | 2.50E-02 | 7.4  | 1.1  | 3.95E-01 |  |
| BRD7      | 13.5 | 1.0 | 16.4 | 1.2 | 3.44E-03 | 14.2 | 1.1  | 8.08E-02 |  |
| NAA35     | 3.9  | 1.0 | 4.7  | 1.2 | 5.69E-03 | 3.6  | -1.1 | 6.62E-03 |  |
| C1GALT1C1 | 6.4  | 1.0 | 7.8  | 1.2 | 2.56E-02 | 6.6  | 1.0  | 1.02E-01 |  |
| CCDC43    | 5.7  | 1.0 | 6.9  | 1.2 | 1.78E-02 | 5.4  | -1.1 | 5.04E-02 |  |
| MANBA     | 4.1  | 1.0 | 5.0  | 1.2 | 4.79E-02 | 3.5  | -1.2 | 5.20E-03 |  |
| RER1      | 13.7 | 1.0 | 16.6 | 1.2 | 5.18E-04 | 13.4 | -1.0 | 2.65E-03 |  |
| ZNF496    | 3.0  | 1.0 | 3.6  | 1.2 | 3.91E-02 | 3.0  | 1.0  | 5.66E-02 |  |
| ZNF706    | 5.8  | 1.0 | 7.1  | 1.2 | 2.49E-02 | 6.9  | 1.2  | 7.98E-01 |  |
| SPRYD3    | 12.3 | 1.0 | 14.9 | 1.2 | 1.78E-02 | 13.2 | 1.1  | 2.00E-01 |  |
| COPS8     | 17.8 | 1.0 | 21.6 | 1.2 | 4.11E-04 | 17.6 | -1.0 | 4.85E-04 |  |
| FOPNL     | 4.6  | 1.0 | 5.6  | 1.2 | 3.40E-02 | 5.0  | 1.1  | 2.59E-01 |  |
| SPTAN1    | 31.4 | 1.0 | 38.1 | 1.2 | 2.16E-02 | 29.5 | -1.1 | 4.21E-02 |  |
| C17orf61  | 18.8 | 1.0 | 22.9 | 1.2 | 3.30E-02 | 21.5 | 1.1  | 2.49E-01 |  |
| BCLAF1    | 8.7  | 1.0 | 10.6 | 1.2 | 6.80E-03 | 9.4  | 1.1  | 1.66E-01 |  |
| DARS      | 14.7 | 1.0 | 17.9 | 1.2 | 3.24E-04 | 14.6 | -1.0 | 4.57E-02 |  |
| ATG14     | 4.6  | 1.0 | 5.6  | 1.2 | 4.64E-02 | 5.3  | 1.1  | 5.69E-01 |  |
| ERLEC1    | 10.7 | 1.0 | 13.0 | 1.2 | 8.04E-03 | 11.2 | 1.0  | 1.60E-01 |  |
| TM2D1     | 8.8  | 1.0 | 10.6 | 1.2 | 6.52E-03 | 8.7  | -1.0 | 6.77E-03 |  |
| ZNF629    | 5.1  | 1.0 | 6.2  | 1.2 | 2.21E-02 | 4.9  | -1.1 | 5.37E-04 |  |
| SRSF6     | 14.6 | 1.0 | 17.8 | 1.2 | 2.32E-03 | 19.3 | 1.3  | 3.07E-01 |  |
| MAPRE3    | 13.8 | 1.0 | 16.8 | 1.2 | 2.29E-02 | 15.3 | 1.1  | 1.37E-01 |  |
| POGK      | 4.2  | 1.0 | 5.1  | 1.2 | 4.51E-02 | 4.8  | 1.2  | 5.13E-01 |  |
| CCT4      | 19.4 | 1.0 | 23.5 | 1.2 | 1.27E-02 | 20.6 | 1.1  | 1.24E-01 |  |
| PCIF1     | 7.1  | 1.0 | 8.7  | 1.2 | 3.31E-02 | 8.1  | 1.1  | 4.11E-01 |  |
| GGPS1     | 4.7  | 1.0 | 5.7  | 1.2 | 1.64E-02 | 5.1  | 1.1  | 2.21E-01 |  |
| DENR      | 3.8  | 1.0 | 4.6  | 1.2 | 5.02E-03 | 4.0  | 1.1  | 1.41E-01 |  |
| SFT2D1    | 6.8  | 1.0 | 8.3  | 1.2 | 4.55E-02 | 7.5  | 1.1  | 3.97E-01 |  |
| NUDCD3    | 11.7 | 1.0 | 14.2 | 1.2 | 5.04E-04 | 12.4 | 1.1  | 1.13E-01 |  |
| TBL1XR1   | 7.3  | 1.0 | 8.9  | 1.2 | 2.68E-02 | 7.9  | 1.1  | 2.17E-01 |  |
| MYST2     | 10.1 | 1.0 | 12.3 | 1.2 | 1.83E-03 | 10.6 | 1.0  | 8.90E-02 |  |
| CENPB     | 10.5 | 1.0 | 12.7 | 1.2 | 1.29E-02 | 10.7 | 1.0  | 4.78E-02 |  |
| GTPBP4    | 9.1  | 1.0 | 11.0 | 1.2 | 2.21E-03 | 9.4  | 1.0  | 7.63E-02 |  |
| TRAK1     | 24.7 | 1.0 | 29.9 | 1.2 | 3.47E-02 | 27.6 | 1.1  | 3.00E-01 |  |
| SIN3B     | 5.9  | 1.0 | 7.2  | 1.2 | 4.75E-02 | 7.8  | 1.3  | 3.45E-01 |  |
| KIAA2013  | 11.5 | 1.0 | 14.0 | 1.2 | 1.68E-02 | 11.2 | -1.0 | 5.69E-03 |  |
| REPS1     | 6.6  | 1.0 | 8.1  | 1.2 | 2.01E-02 | 7.5  | 1.1  | 4.44E-01 |  |
| PFKP      | 44.7 | 1.0 | 54.2 | 1.2 | 2.85E-02 | 48.3 | 1.1  | 5.41E-02 |  |

|           |      |     |      |     |          |      |      |          |  |  |
|-----------|------|-----|------|-----|----------|------|------|----------|--|--|
| BAZZA     | 6.2  | 1.0 | 7.6  | 1.2 | 1.64E-02 | 7.1  | 1.1  | 5.18E-01 |  |  |
| HN1       | 2.6  | 1.0 | 3.1  | 1.2 | 2.23E-02 | 2.6  | 1.0  | 2.75E-01 |  |  |
| SGSM3     | 7.1  | 1.0 | 8.6  | 1.2 | 2.99E-03 | 8.1  | 1.1  | 4.52E-01 |  |  |
| ERH       | 27.3 | 1.0 | 33.1 | 1.2 | 4.34E-03 | 33.4 | 1.2  | 9.12E-01 |  |  |
| ZNF688    | 3.1  | 1.0 | 3.8  | 1.2 | 1.06E-02 | 2.9  | -1.1 | 1.80E-03 |  |  |
| ELP3      | 5.4  | 1.0 | 6.6  | 1.2 | 8.23E-03 | 5.6  | 1.0  | 1.64E-01 |  |  |
| KIAA0495  | 4.1  | 1.0 | 4.9  | 1.2 | 3.96E-02 | 4.3  | 1.1  | 4.51E-02 |  |  |
| TBC1D13   | 4.4  | 1.0 | 5.3  | 1.2 | 4.30E-03 | 4.8  | 1.1  | 1.08E-01 |  |  |
| IKBKG     | 4.2  | 1.0 | 5.1  | 1.2 | 3.65E-02 | 4.9  | 1.2  | 7.05E-01 |  |  |
| MSL1      | 7.4  | 1.0 | 9.0  | 1.2 | 1.35E-02 | 7.2  | -1.0 | 3.83E-02 |  |  |
| C20orf108 | 11.5 | 1.0 | 13.9 | 1.2 | 1.29E-03 | 9.9  | -1.2 | 6.54E-04 |  |  |
| SRRM1     | 10.4 | 1.0 | 12.6 | 1.2 | 8.30E-03 | 12.4 | 1.2  | 7.60E-01 |  |  |
| MCM3      | 6.3  | 1.0 | 7.7  | 1.2 | 1.97E-03 | 6.6  | 1.0  | 2.38E-02 |  |  |
| KIAA0284  | 2.9  | 1.0 | 3.5  | 1.2 | 2.92E-02 | 3.0  | 1.0  | 1.52E-01 |  |  |
| SIVA1     | 12.8 | 1.0 | 15.5 | 1.2 | 4.79E-02 | 14.2 | 1.1  | 1.46E-01 |  |  |
| COG7      | 3.5  | 1.0 | 4.2  | 1.2 | 1.70E-02 | 3.8  | 1.1  | 1.42E-01 |  |  |
| C17orf79  | 12.0 | 1.0 | 14.5 | 1.2 | 4.45E-03 | 12.0 | 1.0  | 9.04E-03 |  |  |
| LSM2      | 6.6  | 1.0 | 8.0  | 1.2 | 3.24E-02 | 7.5  | 1.1  | 3.25E-01 |  |  |
| SGPL1     | 1.9  | 1.0 | 2.4  | 1.2 | 2.08E-02 | 2.0  | 1.0  | 1.10E-01 |  |  |
| TRIM28    | 17.5 | 1.0 | 21.2 | 1.2 | 1.64E-03 | 20.0 | 1.1  | 3.67E-01 |  |  |
| STK16     | 3.2  | 1.0 | 3.9  | 1.2 | 2.26E-02 | 3.4  | 1.1  | 1.52E-01 |  |  |
| DCTN6     | 20.4 | 1.0 | 24.6 | 1.2 | 2.35E-04 | 23.1 | 1.1  | 2.11E-01 |  |  |
| HNRNPK    | 64.0 | 1.0 | 77.4 | 1.2 | 1.12E-03 | 71.2 | 1.1  | 3.16E-01 |  |  |
| C18orf32  | 12.7 | 1.0 | 15.3 | 1.2 | 7.50E-03 | 13.8 | 1.1  | 2.26E-01 |  |  |
| CHMP2B    | 8.3  | 1.0 | 10.1 | 1.2 | 2.18E-03 | 8.5  | 1.0  | 3.83E-02 |  |  |
| SERINC3   | 25.4 | 1.0 | 30.7 | 1.2 | 1.23E-02 | 23.7 | -1.1 | 1.87E-02 |  |  |
| SSSCA1    | 7.8  | 1.0 | 9.4  | 1.2 | 2.57E-02 | 9.1  | 1.2  | 7.14E-01 |  |  |
| EXOC7     | 13.3 | 1.0 | 16.1 | 1.2 | 8.35E-03 | 14.1 | 1.1  | 1.01E-01 |  |  |
| DYNC1L1   | 16.3 | 1.0 | 19.8 | 1.2 | 4.57E-03 | 16.6 | 1.0  | 3.16E-02 |  |  |
| YIPF3     | 21.0 | 1.0 | 25.4 | 1.2 | 5.78E-03 | 22.3 | 1.1  | 6.74E-02 |  |  |
| B3GNT1    | 9.9  | 1.0 | 11.9 | 1.2 | 8.84E-03 | 8.4  | -1.2 | 7.86E-05 |  |  |
| TH1L      | 8.0  | 1.0 | 9.7  | 1.2 | 1.36E-02 | 8.9  | 1.1  | 2.95E-01 |  |  |
| OBFC2B    | 3.9  | 1.0 | 4.7  | 1.2 | 3.82E-02 | 3.8  | -1.0 | 7.58E-02 |  |  |
| SIRT1     | 3.0  | 1.0 | 3.6  | 1.2 | 4.30E-02 | 3.7  | 1.2  | 9.51E-01 |  |  |
| KATNB1    | 2.6  | 1.0 | 3.2  | 1.2 | 2.98E-02 | 2.6  | -1.0 | 4.95E-03 |  |  |
| RNF114    | 11.2 | 1.0 | 13.6 | 1.2 | 1.65E-02 | 11.4 | 1.0  | 1.20E-01 |  |  |
| SET       | 22.1 | 1.0 | 26.7 | 1.2 | 1.28E-02 | 24.0 | 1.1  | 1.68E-01 |  |  |
| C20orf111 | 10.6 | 1.0 | 12.8 | 1.2 | 1.27E-02 | 12.4 | 1.2  | 7.73E-01 |  |  |
| SF3B3     | 5.8  | 1.0 | 7.0  | 1.2 | 2.76E-03 | 6.1  | 1.1  | 8.96E-02 |  |  |
| NECAB3    | 11.7 | 1.0 | 14.1 | 1.2 | 1.80E-03 | 12.4 | 1.1  | 1.35E-02 |  |  |
| HABP4     | 9.3  | 1.0 | 11.2 | 1.2 | 2.12E-02 | 10.3 | 1.1  | 2.35E-01 |  |  |
| WDR45L    | 13.2 | 1.0 | 16.0 | 1.2 | 7.78E-03 | 15.1 | 1.1  | 5.38E-01 |  |  |
| NADSYN1   | 4.4  | 1.0 | 5.3  | 1.2 | 4.16E-02 | 4.5  | 1.0  | 2.66E-03 |  |  |
| PSMC1     | 48.5 | 1.0 | 58.5 | 1.2 | 2.02E-03 | 51.3 | 1.1  | 1.31E-01 |  |  |
| SH3BP5L   | 6.0  | 1.0 | 7.2  | 1.2 | 4.51E-02 | 6.7  | 1.1  | 5.32E-01 |  |  |
| XRCC1     | 3.7  | 1.0 | 4.5  | 1.2 | 3.13E-02 | 4.1  | 1.1  | 4.21E-01 |  |  |
| TMEM57    | 3.6  | 1.0 | 4.3  | 1.2 | 9.78E-03 | 3.4  | -1.1 | 4.80E-03 |  |  |
| ARFGAP2   | 14.9 | 1.0 | 18.0 | 1.2 | 1.84E-02 | 15.9 | 1.1  | 5.92E-02 |  |  |
| ACTL6A    | 5.9  | 1.0 | 7.1  | 1.2 | 1.06E-02 | 6.1  | 1.0  | 1.65E-01 |  |  |
| KATNA1    | 3.7  | 1.0 | 4.5  | 1.2 | 1.64E-02 | 3.9  | 1.1  | 2.77E-01 |  |  |
| PSMA1     | 36.4 | 1.0 | 43.9 | 1.2 | 9.49E-04 | 38.0 | 1.0  | 2.41E-02 |  |  |
| TSR2      | 15.6 | 1.0 | 18.8 | 1.2 | 1.15E-02 | 18.4 | 1.2  | 7.93E-01 |  |  |
| CREBL2    | 5.6  | 1.0 | 6.8  | 1.2 | 4.66E-02 | 5.6  | 1.0  | 1.65E-01 |  |  |
| NOLC1     | 7.2  | 1.0 | 8.7  | 1.2 | 5.79E-03 | 7.6  | 1.0  | 8.76E-02 |  |  |
| CD2BP2    | 5.4  | 1.0 | 6.5  | 1.2 | 1.38E-02 | 5.9  | 1.1  | 1.13E-01 |  |  |
| ZNF512    | 5.3  | 1.0 | 6.4  | 1.2 | 1.05E-02 | 5.9  | 1.1  | 3.14E-01 |  |  |
| THTPA     | 5.4  | 1.0 | 6.5  | 1.2 | 1.44E-02 | 5.9  | 1.1  | 3.79E-01 |  |  |
| LCMT1     | 8.8  | 1.0 | 10.6 | 1.2 | 1.84E-04 | 9.6  | 1.1  | 2.79E-01 |  |  |
| RBM22     | 7.6  | 1.0 | 9.2  | 1.2 | 2.32E-02 | 8.9  | 1.2  | 8.08E-01 |  |  |
| HIP1      | 3.2  | 1.0 | 3.9  | 1.2 | 3.54E-02 | 2.8  | -1.2 | 7.49E-02 |  |  |
| GRIPAP1   | 7.4  | 1.0 | 8.9  | 1.2 | 1.02E-02 | 8.5  | 1.1  | 4.99E-01 |  |  |
| AMZ2      | 21.5 | 1.0 | 26.0 | 1.2 | 1.64E-03 | 22.6 | 1.0  | 1.01E-01 |  |  |
| SAP130    | 4.0  | 1.0 | 4.8  | 1.2 | 4.88E-02 | 4.0  | 1.0  | 1.60E-01 |  |  |
| POMT1     | 5.2  | 1.0 | 6.3  | 1.2 | 2.93E-03 | 5.9  | 1.1  | 3.08E-01 |  |  |
| UBE2S     | 5.9  | 1.0 | 7.1  | 1.2 | 4.20E-02 | 6.7  | 1.1  | 5.44E-01 |  |  |
| SCRIB     | 4.2  | 1.0 | 5.1  | 1.2 | 2.70E-02 | 4.6  | 1.1  | 2.40E-01 |  |  |
| PLEKHM1   | 3.9  | 1.0 | 4.7  | 1.2 | 3.20E-02 | 4.5  | 1.2  | 7.30E-01 |  |  |
| GOPC      | 7.0  | 1.0 | 8.4  | 1.2 | 1.92E-02 | 7.3  | 1.0  | 2.11E-01 |  |  |
| LMTK2     | 4.9  | 1.0 | 5.9  | 1.2 | 4.91E-02 | 5.0  | 1.0  | 2.26E-01 |  |  |
| BICD2     | 8.8  | 1.0 | 10.6 | 1.2 | 2.82E-02 | 8.8  | 1.0  | 9.36E-02 |  |  |
| ECD       | 5.2  | 1.0 | 6.3  | 1.2 | 4.87E-02 | 6.0  | 1.2  | 6.51E-01 |  |  |
| C11orf68  | 12.0 | 1.0 | 14.5 | 1.2 | 4.51E-02 | 13.7 | 1.1  | 3.66E-01 |  |  |
| MARS      | 12.6 | 1.0 | 15.2 | 1.2 | 9.76E-04 | 13.1 | 1.0  | 7.98E-02 |  |  |
| MPPE1     | 4.3  | 1.0 | 5.2  | 1.2 | 4.05E-02 | 4.3  | 1.0  | 1.91E-02 |  |  |
| CNIH4     | 8.9  | 1.0 | 10.7 | 1.2 | 1.18E-02 | 9.4  | 1.0  | 9.74E-02 |  |  |
| TMEM199   | 4.7  | 1.0 | 5.6  | 1.2 | 8.04E-03 | 5.0  | 1.1  | 1.31E-01 |  |  |
| VPS28     | 31.4 | 1.0 | 37.8 | 1.2 | 9.39E-03 | 36.7 | 1.2  | 5.49E-01 |  |  |
| ENOPH1    | 5.4  | 1.0 | 6.5  | 1.2 | 1.57E-03 | 5.5  | 1.0  | 4.74E-02 |  |  |
| SPNS1     | 4.8  | 1.0 | 5.8  | 1.2 | 1.80E-02 | 5.2  | 1.1  | 2.72E-01 |  |  |
| CARKD     | 8.0  | 1.0 | 9.7  | 1.2 | 1.41E-03 | 8.8  | 1.1  | 9.67E-02 |  |  |
| TMBIM4    | 9.4  | 1.0 | 11.3 | 1.2 | 3.90E-02 | 9.5  | 1.0  | 4.62E-02 |  |  |
| COG4      | 9.9  | 1.0 | 11.9 | 1.2 | 2.72E-02 | 10.4 | 1.0  | 9.24E-02 |  |  |
| SMARCC2   | 10.9 | 1.0 | 13.1 | 1.2 | 4.29E-02 | 11.7 | 1.1  | 3.46E-01 |  |  |
| TCF25     | 16.6 | 1.0 | 20.0 | 1.2 | 8.72E-03 | 18.3 | 1.1  | 3.17E-01 |  |  |

|           |       |     |       |      |          |       |      |          |   |   |
|-----------|-------|-----|-------|------|----------|-------|------|----------|---|---|
| FTSJ3     | 7.1   | 1.0 | 8.5   | 1.2  | 3.02E-02 | 7.3   | 1.0  | 9.79E-02 |   |   |
| TM2D3     | 12.5  | 1.0 | 15.0  | 1.2  | 3.58E-03 | 14.2  | 1.1  | 3.96E-01 |   |   |
| FAM3C     | 16.0  | 1.0 | 19.2  | 1.2  | 5.49E-03 | 15.4  | -1.0 | 4.85E-02 |   |   |
| WDR6      | 16.3  | 1.0 | 19.6  | 1.2  | 1.91E-02 | 17.7  | 1.1  | 9.37E-02 |   |   |
| TFCP2     | 4.8   | 1.0 | 5.7   | 1.2  | 1.10E-04 | 4.9   | 1.0  | 1.34E-02 |   |   |
| TMEM14C   | 30.7  | 1.0 | 36.9  | 1.2  | 3.57E-02 | 31.9  | 1.0  | 1.84E-02 |   |   |
| ARIH2     | 27.0  | 1.0 | 32.4  | 1.2  | 4.54E-02 | 29.2  | 1.1  | 3.87E-01 |   |   |
| C16orf72  | 6.8   | 1.0 | 8.1   | 1.2  | 1.72E-03 | 6.6   | -1.0 | 1.71E-02 |   |   |
| BRIX1     | 5.3   | 1.0 | 6.4   | 1.2  | 3.62E-02 | 6.8   | 1.3  | 5.28E-01 |   |   |
| VPS39     | 12.7  | 1.0 | 15.2  | 1.2  | 5.06E-04 | 12.8  | 1.0  | 7.14E-03 |   |   |
| DIABLO    | 6.8   | 1.0 | 8.2   | 1.2  | 5.45E-04 | 7.6   | 1.1  | 1.95E-01 |   |   |
| BAG5      | 3.7   | 1.0 | 4.4   | 1.2  | 1.64E-02 | 3.4   | -1.1 | 3.69E-02 |   |   |
| NMT1      | 10.1  | 1.0 | 12.1  | 1.2  | 1.17E-03 | 10.0  | -1.0 | 5.09E-02 |   |   |
| RABL5     | 4.1   | 1.0 | 4.9   | 1.2  | 2.70E-02 | 3.7   | -1.1 | 1.62E-03 |   |   |
| VT11B     | 24.7  | 1.0 | 29.7  | 1.2  | 2.48E-02 | 25.3  | 1.0  | 8.00E-02 |   |   |
| PIN1      | 23.3  | 1.0 | 28.0  | 1.2  | 1.21E-02 | 25.2  | 1.1  | 1.08E-01 |   |   |
| KIAA0355  | 4.2   | 1.0 | 5.0   | 1.2  | 4.87E-02 | 4.4   | 1.1  | 1.89E-01 |   |   |
| VPS11     | 6.4   | 1.0 | 7.7   | 1.2  | 2.71E-02 | 7.2   | 1.1  | 5.50E-01 |   |   |
| CSTF1     | 4.9   | 1.0 | 5.8   | 1.2  | 4.92E-04 | 4.9   | 1.0  | 7.02E-02 |   |   |
| ABHD16A   | 7.7   | 1.0 | 9.2   | 1.2  | 1.72E-02 | 7.5   | -1.0 | 5.05E-02 |   |   |
| JMY       | 1.9   | 1.0 | 2.3   | 1.2  | 2.18E-02 | 2.0   | 1.0  | 9.61E-02 |   |   |
| FNIP1     | 3.6   | 1.0 | 2.9   | -1.3 | 4.10E-02 | 2.9   | -1.2 | 9.56E-01 |   |   |
| TMEM168   | 5.7   | 1.0 | 4.5   | -1.3 | 1.79E-02 | 4.4   | -1.3 | 7.05E-01 |   |   |
| NDUF56    | 121.7 | 1.0 | 97.1  | -1.3 | 1.04E-02 | 107.4 | -1.1 | 2.36E-01 |   |   |
| SLC25A12  | 31.5  | 1.0 | 25.1  | -1.3 | 8.20E-03 | 21.2  | -1.5 | 1.44E-02 |   |   |
| AKAP1     | 47.0  | 1.0 | 37.5  | -1.3 | 3.17E-02 | 33.6  | -1.4 | 1.84E-01 |   |   |
| LARP1B    | 4.9   | 1.0 | 3.9   | -1.3 | 1.30E-02 | 3.5   | -1.4 | 5.85E-02 |   |   |
| SPATA13   | 2.9   | 1.0 | 2.3   | -1.3 | 9.23E-03 | 2.0   | -1.4 | 3.58E-01 |   |   |
| OCIAD2    | 5.4   | 1.0 | 4.3   | -1.3 | 3.54E-02 | 4.1   | -1.3 | 7.75E-01 |   |   |
| SLC25A46  | 16.2  | 1.0 | 12.9  | -1.3 | 7.83E-03 | 11.1  | -1.5 | 1.70E-01 |   |   |
| MAP3K5    | 7.2   | 1.0 | 5.7   | -1.3 | 1.59E-02 | 5.8   | -1.2 | 7.27E-01 |   |   |
| PPP1R13L  | 23.5  | 1.0 | 18.7  | -1.3 | 1.13E-02 | 18.8  | -1.2 | 8.79E-01 |   |   |
| NBAS      | 6.2   | 1.0 | 4.9   | -1.3 | 2.74E-03 | 4.1   | -1.5 | 7.09E-02 |   |   |
| C7orf70   | 6.8   | 1.0 | 5.4   | -1.3 | 2.06E-04 | 5.5   | -1.2 | 8.80E-01 |   |   |
| TACC1     | 14.8  | 1.0 | 11.7  | -1.3 | 3.26E-02 | 14.7  | -1.0 | 2.03E-01 |   |   |
| UBAP2     | 6.4   | 1.0 | 5.1   | -1.3 | 2.97E-03 | 5.7   | -1.1 | 3.26E-01 |   |   |
| ZBTB43    | 5.2   | 1.0 | 4.1   | -1.3 | 2.06E-02 | 3.5   | -1.5 | 2.40E-01 |   |   |
| MACROD1   | 25.3  | 1.0 | 20.0  | -1.3 | 2.65E-04 | 23.5  | -1.1 | 1.85E-02 |   |   |
| GPRCSB    | 21.5  | 1.0 | 17.0  | -1.3 | 1.34E-02 | 15.1  | -1.4 | 3.24E-01 |   |   |
| NDRG4     | 180.9 | 1.0 | 143.1 | -1.3 | 1.70E-02 | 135.0 | -1.3 | 5.98E-01 |   |   |
| YTHDC2    | 3.6   | 1.0 | 2.8   | -1.3 | 4.19E-02 | 2.7   | -1.3 | 6.96E-01 |   |   |
| TEK       | 8.3   | 1.0 | 6.6   | -1.3 | 1.37E-02 | 5.7   | -1.4 | 4.73E-01 |   |   |
| RCSD1     | 13.4  | 1.0 | 10.6  | -1.3 | 4.03E-02 | 9.8   | -1.4 | 5.29E-01 |   |   |
| MTUS1     | 39.1  | 1.0 | 30.9  | -1.3 | 1.22E-02 | 40.9  | 1.0  | 7.09E-03 | √ | √ |
| NDUFB10   | 213.4 | 1.0 | 168.5 | -1.3 | 7.71E-04 | 171.6 | -1.2 | 8.29E-01 |   |   |
| C22orf13  | 22.7  | 1.0 | 17.9  | -1.3 | 3.26E-03 | 15.3  | -1.5 | 4.70E-02 |   |   |
| GPR56     | 6.2   | 1.0 | 4.9   | -1.3 | 1.61E-02 | 6.2   | 1.0  | 1.48E-01 |   |   |
| PIK3CB    | 6.0   | 1.0 | 4.8   | -1.3 | 2.86E-02 | 3.6   | -1.7 | 1.11E-01 |   |   |
| MRPL34    | 21.1  | 1.0 | 16.7  | -1.3 | 3.01E-02 | 15.8  | -1.3 | 4.18E-01 |   |   |
| RAVER2    | 6.0   | 1.0 | 4.8   | -1.3 | 7.09E-03 | 4.8   | -1.3 | 9.08E-01 |   |   |
| NDUFB9    | 206.7 | 1.0 | 162.7 | -1.3 | 9.88E-04 | 183.0 | -1.1 | 1.62E-01 |   |   |
| COX5A     | 376.3 | 1.0 | 296.1 | -1.3 | 1.49E-03 | 300.3 | -1.3 | 8.79E-01 |   |   |
| PHKA2     | 7.6   | 1.0 | 6.0   | -1.3 | 4.03E-03 | 5.5   | -1.4 | 2.27E-01 |   |   |
| DNAJC19   | 17.2  | 1.0 | 13.5  | -1.3 | 4.16E-03 | 14.7  | -1.2 | 3.11E-01 |   |   |
| GALK1     | 3.8   | 1.0 | 2.9   | -1.3 | 1.42E-02 | 3.0   | -1.3 | 9.54E-01 |   |   |
| ARHGAP29  | 5.4   | 1.0 | 4.2   | -1.3 | 1.64E-02 | 3.3   | -1.6 | 8.01E-02 |   |   |
| C11orf67  | 30.5  | 1.0 | 23.8  | -1.3 | 1.11E-02 | 30.0  | -1.0 | 4.15E-02 | √ | √ |
| PRKCE     | 2.4   | 1.0 | 1.9   | -1.3 | 8.98E-03 | 1.7   | -1.4 | 1.24E-01 |   |   |
| IGF2R     | 16.4  | 1.0 | 12.8  | -1.3 | 3.26E-03 | 11.3  | -1.5 | 1.51E-01 |   |   |
| KIAA0564  | 8.6   | 1.0 | 6.7   | -1.3 | 3.14E-02 | 6.2   | -1.4 | 6.84E-01 |   |   |
| ATP5G1    | 140.6 | 1.0 | 109.4 | -1.3 | 3.57E-03 | 123.6 | -1.1 | 2.29E-01 |   |   |
| PXMP2     | 14.1  | 1.0 | 11.0  | -1.3 | 3.22E-02 | 9.7   | -1.5 | 4.28E-01 |   |   |
| RBFOX1    | 11.6  | 1.0 | 9.0   | -1.3 | 1.46E-02 | 8.6   | -1.4 | 5.98E-01 |   |   |
| TEAD1     | 10.5  | 1.0 | 8.2   | -1.3 | 3.37E-02 | 7.1   | -1.5 | 3.41E-01 |   |   |
| TBC1D4    | 17.0  | 1.0 | 13.2  | -1.3 | 3.50E-02 | 14.1  | -1.2 | 5.38E-01 |   |   |
| TMEM65    | 9.7   | 1.0 | 7.5   | -1.3 | 1.77E-02 | 7.2   | -1.3 | 6.05E-01 |   |   |
| C14orf142 | 5.5   | 1.0 | 4.2   | -1.3 | 1.56E-02 | 4.2   | -1.3 | 9.16E-01 |   |   |
| PARVB     | 26.2  | 1.0 | 20.3  | -1.3 | 3.22E-02 | 18.5  | -1.4 | 2.01E-01 |   |   |
| KAT2B     | 14.8  | 1.0 | 11.4  | -1.3 | 7.79E-03 | 10.3  | -1.4 | 3.18E-01 |   |   |
| CYYR1     | 7.1   | 1.0 | 5.5   | -1.3 | 2.62E-02 | 5.0   | -1.4 | 4.46E-01 |   |   |
| DECR1     | 123.5 | 1.0 | 95.5  | -1.3 | 1.13E-02 | 93.0  | -1.3 | 8.05E-01 |   |   |
| GLUL      | 60.3  | 1.0 | 46.6  | -1.3 | 8.87E-03 | 67.7  | 1.1  | 9.75E-02 |   |   |
| AHCY      | 22.0  | 1.0 | 17.0  | -1.3 | 1.69E-03 | 16.1  | -1.4 | 3.87E-01 |   |   |
| PKP2      | 95.0  | 1.0 | 73.4  | -1.3 | 1.53E-02 | 78.5  | -1.2 | 6.72E-01 |   |   |
| PTPRB     | 7.7   | 1.0 | 5.9   | -1.3 | 2.18E-02 | 5.2   | -1.5 | 4.58E-01 |   |   |
| ATP1B1    | 84.9  | 1.0 | 65.5  | -1.3 | 1.32E-02 | 60.6  | -1.4 | 3.44E-01 |   |   |
| TEAD2     | 16.3  | 1.0 | 12.5  | -1.3 | 1.39E-02 | 13.0  | -1.2 | 6.42E-01 |   |   |
| GMPR      | 38.3  | 1.0 | 29.6  | -1.3 | 7.04E-03 | 31.8  | -1.2 | 4.88E-01 |   |   |
| TSPAN14   | 7.4   | 1.0 | 5.7   | -1.3 | 1.42E-02 | 5.4   | -1.4 | 5.06E-01 |   |   |
| NDUFB1    | 140.9 | 1.0 | 108.6 | -1.3 | 6.14E-03 | 122.4 | -1.2 | 3.92E-01 |   |   |
| WWP1      | 25.6  | 1.0 | 19.7  | -1.3 | 7.29E-03 | 15.9  | -1.6 | 1.37E-01 |   |   |
| PTER      | 2.5   | 1.0 | 2.0   | -1.3 | 3.46E-02 | 1.6   | -1.6 | 1.30E-01 |   |   |
| ACADVL    | 279.5 | 1.0 | 215.0 | -1.3 | 1.41E-03 | 210.3 | -1.3 | 7.65E-01 |   |   |
| ERCC1     | 28.6  | 1.0 | 22.0  | -1.3 | 7.81E-05 | 24.1  | -1.2 | 1.09E-01 |   |   |

|           |       |     |       |      |          |       |      |          |   |   |
|-----------|-------|-----|-------|------|----------|-------|------|----------|---|---|
| C6orf136  | 13.1  | 1.0 | 10.1  | -1.3 | 2.48E-03 | 11.1  | -1.2 | 3.13E-01 |   |   |
| LRRC39    | 53.9  | 1.0 | 41.3  | -1.3 | 3.35E-02 | 39.7  | -1.4 | 7.44E-01 |   |   |
| FBXL5     | 22.5  | 1.0 | 17.2  | -1.3 | 7.93E-05 | 15.5  | -1.5 | 2.30E-01 |   |   |
| SLC7A6    | 14.3  | 1.0 | 11.0  | -1.3 | 1.26E-02 | 13.4  | -1.1 | 2.11E-01 |   |   |
| TSPAN13   | 6.8   | 1.0 | 5.2   | -1.3 | 3.61E-02 | 6.9   | 1.0  | 1.47E-01 |   |   |
| SOD2      | 117.8 | 1.0 | 90.1  | -1.3 | 3.96E-02 | 75.1  | -1.6 | 4.06E-02 |   |   |
| EGLN1     | 11.8  | 1.0 | 9.0   | -1.3 | 1.59E-03 | 9.2   | -1.3 | 9.05E-01 |   |   |
| MTIF3     | 53.2  | 1.0 | 40.6  | -1.3 | 5.55E-03 | 43.2  | -1.2 | 5.33E-01 |   |   |
| ProSAPIP1 | 3.9   | 1.0 | 2.9   | -1.3 | 6.36E-04 | 3.1   | -1.2 | 6.18E-01 |   |   |
| UQCRB     | 99.4  | 1.0 | 75.8  | -1.3 | 3.90E-03 | 86.7  | -1.1 | 2.51E-01 |   |   |
| MCCC2     | 18.5  | 1.0 | 14.1  | -1.3 | 1.33E-02 | 12.0  | -1.5 | 2.97E-03 |   |   |
| FOXN3     | 13.8  | 1.0 | 10.5  | -1.3 | 2.10E-03 | 9.7   | -1.4 | 3.19E-01 |   |   |
| USP28     | 22.6  | 1.0 | 17.1  | -1.3 | 1.95E-02 | 16.6  | -1.4 | 8.45E-01 |   |   |
| PPP1R13B  | 16.8  | 1.0 | 12.8  | -1.3 | 9.23E-03 | 12.1  | -1.4 | 5.85E-01 |   |   |
| UBR3      | 14.0  | 1.0 | 10.6  | -1.3 | 2.17E-02 | 8.5   | -1.6 | 1.46E-01 |   |   |
| DBI       | 187.8 | 1.0 | 142.0 | -1.3 | 4.63E-03 | 152.9 | -1.2 | 2.88E-01 |   |   |
| ISOC1     | 24.1  | 1.0 | 18.2  | -1.3 | 1.05E-02 | 16.3  | -1.5 | 3.03E-01 |   |   |
| HADHA     | 156.7 | 1.0 | 118.4 | -1.3 | 3.85E-03 | 117.3 | -1.3 | 9.36E-01 |   |   |
| PGP       | 9.4   | 1.0 | 7.1   | -1.3 | 6.48E-04 | 7.0   | -1.3 | 7.97E-01 |   |   |
| ECHDC3    | 18.3  | 1.0 | 13.8  | -1.3 | 1.53E-02 | 15.7  | -1.2 | 4.36E-01 |   |   |
| TTN       | 93.0  | 1.0 | 70.0  | -1.3 | 1.54E-02 | 64.3  | -1.4 | 6.03E-01 |   |   |
| MTERFD1   | 11.0  | 1.0 | 8.3   | -1.3 | 1.56E-02 | 8.1   | -1.4 | 9.14E-01 |   |   |
| PPP2R3A   | 15.6  | 1.0 | 11.7  | -1.3 | 3.14E-02 | 12.6  | -1.2 | 7.26E-01 |   |   |
| ADCK3     | 79.1  | 1.0 | 59.5  | -1.3 | 2.99E-02 | 55.9  | -1.4 | 5.36E-01 |   |   |
| LPIN1     | 8.8   | 1.0 | 6.6   | -1.3 | 1.47E-02 | 7.3   | -1.2 | 3.96E-01 |   |   |
| GPX3      | 307.2 | 1.0 | 230.6 | -1.3 | 1.44E-02 | 199.6 | -1.5 | 2.13E-01 |   |   |
| TMEM150C  | 4.9   | 1.0 | 3.7   | -1.3 | 9.89E-03 | 3.3   | -1.5 | 4.63E-01 |   |   |
| NCOA3     | 5.5   | 1.0 | 4.1   | -1.3 | 3.50E-03 | 4.4   | -1.2 | 5.41E-01 |   |   |
| STARD8    | 3.4   | 1.0 | 2.6   | -1.3 | 4.49E-03 | 4.1   | 1.2  | 3.20E-02 |   |   |
| OSBPL11   | 3.6   | 1.0 | 2.7   | -1.3 | 4.16E-02 | 2.7   | -1.3 | 9.88E-01 |   |   |
| PLA2G12A  | 4.7   | 1.0 | 3.5   | -1.3 | 3.09E-02 | 2.9   | -1.6 | 1.81E-02 |   |   |
| ICAM3     | 3.8   | 1.0 | 2.8   | -1.3 | 4.05E-02 | 2.5   | -1.5 | 2.56E-01 |   |   |
| SLC25A36  | 16.2  | 1.0 | 12.1  | -1.3 | 3.76E-03 | 13.9  | -1.2 | 2.05E-01 |   |   |
| IDH2      | 240.9 | 1.0 | 179.1 | -1.3 | 8.44E-03 | 189.2 | -1.3 | 5.37E-01 |   |   |
| CBFA2T3   | 3.1   | 1.0 | 2.3   | -1.3 | 8.53E-03 | 3.2   | 1.0  | 2.00E-02 | √ | √ |
| MARK3     | 21.7  | 1.0 | 16.1  | -1.4 | 1.56E-03 | 14.4  | -1.5 | 3.37E-01 |   |   |
| ITGA6     | 13.4  | 1.0 | 9.9   | -1.4 | 2.02E-03 | 11.7  | -1.1 | 4.49E-01 |   |   |
| DAAM1     | 8.1   | 1.0 | 6.0   | -1.4 | 2.96E-02 | 4.6   | -1.8 | 1.33E-01 |   |   |
| KCNH2     | 24.4  | 1.0 | 18.0  | -1.4 | 1.73E-02 | 17.0  | -1.4 | 5.15E-01 |   |   |
| COX7B     | 667.4 | 1.0 | 489.8 | -1.4 | 2.56E-04 | 542.3 | -1.2 | 3.64E-01 |   |   |
| C1orf183  | 3.1   | 1.0 | 2.2   | -1.4 | 3.82E-02 | 3.2   | 1.0  | 5.19E-03 | √ | √ |
| BCKDHB    | 9.8   | 1.0 | 7.2   | -1.4 | 1.05E-02 | 5.4   | -1.8 | 2.92E-02 |   |   |
| SLC41A1   | 74.5  | 1.0 | 54.5  | -1.4 | 9.70E-03 | 44.8  | -1.7 | 3.67E-02 |   |   |
| STARD10   | 10.2  | 1.0 | 7.5   | -1.4 | 3.69E-02 | 8.0   | -1.3 | 4.82E-01 |   |   |
| TGFBR3    | 6.0   | 1.0 | 4.4   | -1.4 | 2.11E-02 | 4.0   | -1.5 | 4.67E-01 |   |   |
| AGTPBP1   | 8.1   | 1.0 | 5.9   | -1.4 | 4.81E-03 | 4.9   | -1.6 | 6.16E-02 |   |   |
| PLXNB1    | 8.2   | 1.0 | 6.0   | -1.4 | 1.28E-02 | 5.7   | -1.4 | 6.77E-01 |   |   |
| RORC      | 4.6   | 1.0 | 3.3   | -1.4 | 2.08E-02 | 3.8   | -1.2 | 1.30E-01 |   |   |
| TMEM177   | 2.4   | 1.0 | 1.7   | -1.4 | 2.96E-02 | 1.9   | -1.3 | 4.80E-01 |   |   |
| COX6A2    | 652.6 | 1.0 | 471.8 | -1.4 | 1.26E-02 | 622.6 | -1.0 | 1.23E-01 |   |   |
| JPH2      | 37.3  | 1.0 | 26.9  | -1.4 | 4.15E-02 | 32.9  | -1.1 | 2.05E-01 |   |   |
| APOBEC2   | 66.8  | 1.0 | 48.3  | -1.4 | 6.67E-03 | 42.8  | -1.6 | 3.28E-01 |   |   |
| C10orf58  | 25.9  | 1.0 | 18.7  | -1.4 | 4.92E-04 | 16.8  | -1.5 | 3.55E-01 |   |   |
| CALCOCO2  | 60.2  | 1.0 | 43.4  | -1.4 | 1.40E-04 | 43.2  | -1.4 | 9.67E-01 |   |   |
| SLC4A7    | 1.8   | 1.0 | 1.3   | -1.4 | 1.11E-02 | 1.6   | -1.1 | 9.62E-02 |   |   |
| GPD1L     | 72.8  | 1.0 | 52.3  | -1.4 | 3.02E-02 | 39.7  | -1.8 | 5.67E-03 |   |   |
| PLN       | 792.3 | 1.0 | 568.5 | -1.4 | 2.70E-04 | 589.6 | -1.3 | 7.62E-01 |   |   |
| NHLRC2    | 4.3   | 1.0 | 3.1   | -1.4 | 2.48E-02 | 2.9   | -1.5 | 7.10E-01 |   |   |
| C10orf54  | 9.8   | 1.0 | 7.0   | -1.4 | 1.86E-02 | 6.3   | -1.5 | 3.75E-01 |   |   |
| ACSS3     | 5.8   | 1.0 | 4.1   | -1.4 | 9.87E-03 | 3.9   | -1.5 | 7.70E-01 |   |   |
| MFSD6     | 5.9   | 1.0 | 4.2   | -1.4 | 5.15E-03 | 4.1   | -1.4 | 8.39E-01 |   |   |
| C19orf47  | 17.3  | 1.0 | 12.4  | -1.4 | 7.61E-04 | 13.3  | -1.3 | 4.36E-01 |   |   |
| HAND1     | 8.0   | 1.0 | 5.7   | -1.4 | 9.95E-03 | 5.4   | -1.5 | 7.65E-01 |   |   |
| FAM78A    | 8.0   | 1.0 | 5.7   | -1.4 | 2.58E-02 | 5.2   | -1.6 | 4.61E-01 |   |   |
| DOCK9     | 7.7   | 1.0 | 5.5   | -1.4 | 6.79E-03 | 6.4   | -1.2 | 2.79E-01 |   |   |
| SLC29A2   | 5.6   | 1.0 | 4.0   | -1.4 | 1.26E-03 | 5.0   | -1.1 | 1.12E-01 |   |   |
| CYP4V2    | 3.5   | 1.0 | 2.5   | -1.4 | 3.39E-02 | 2.4   | -1.5 | 8.31E-01 |   |   |
| GPR133    | 12.9  | 1.0 | 9.2   | -1.4 | 2.73E-02 | 7.5   | -1.7 | 6.31E-02 |   |   |
| PLCL1     | 16.0  | 1.0 | 11.3  | -1.4 | 1.19E-02 | 10.3  | -1.6 | 6.03E-01 |   |   |
| DSC2      | 5.4   | 1.0 | 3.8   | -1.4 | 1.24E-02 | 3.4   | -1.6 | 3.17E-01 |   |   |
| TRPM7     | 4.7   | 1.0 | 3.3   | -1.4 | 9.82E-04 | 3.0   | -1.6 | 2.24E-01 |   |   |
| ITPKB     | 4.8   | 1.0 | 3.4   | -1.4 | 2.00E-02 | 2.8   | -1.7 | 1.74E-01 |   |   |
| PIP5K1B   | 17.1  | 1.0 | 12.0  | -1.4 | 8.45E-03 | 10.5  | -1.6 | 1.24E-01 |   |   |
| STRADB    | 15.7  | 1.0 | 11.1  | -1.4 | 3.67E-05 | 11.2  | -1.4 | 9.41E-01 |   |   |
| LOC389333 | 8.7   | 1.0 | 6.1   | -1.4 | 1.55E-02 | 5.9   | -1.5 | 8.34E-01 |   |   |
| FNDC5     | 14.7  | 1.0 | 10.4  | -1.4 | 7.33E-03 | 10.9  | -1.3 | 6.17E-01 |   |   |
| MRPL48    | 10.5  | 1.0 | 7.4   | -1.4 | 1.68E-04 | 8.6   | -1.2 | 1.28E-01 |   |   |
| ESRRG     | 5.3   | 1.0 | 3.7   | -1.4 | 3.10E-02 | 3.0   | -1.8 | 5.28E-02 |   |   |
| SYT7      | 4.7   | 1.0 | 3.3   | -1.4 | 1.48E-02 | 3.1   | -1.5 | 6.81E-01 |   |   |
| SPATA24   | 3.4   | 1.0 | 2.4   | -1.4 | 2.01E-02 | 2.9   | -1.2 | 4.37E-01 |   |   |
| TMEM88    | 13.7  | 1.0 | 9.6   | -1.4 | 4.56E-03 | 9.9   | -1.4 | 8.55E-01 |   |   |
| PTP4A3    | 173.4 | 1.0 | 121.3 | -1.4 | 2.30E-02 | 131.3 | -1.3 | 5.07E-01 |   |   |
| TMTC1     | 5.7   | 1.0 | 4.0   | -1.4 | 3.66E-04 | 3.4   | -1.7 | 1.47E-01 |   |   |
| SELENBP1  | 24.3  | 1.0 | 16.9  | -1.4 | 2.36E-02 | 17.7  | -1.4 | 7.26E-01 |   |   |

|              |        |     |        |      |          |        |      |          |   |   |
|--------------|--------|-----|--------|------|----------|--------|------|----------|---|---|
| NCEH1        | 9.8    | 1.0 | 6.8    | -1.4 | 7.04E-03 | 7.4    | -1.3 | 5.68E-01 |   |   |
| GTF3A        | 68.4   | 1.0 | 47.5   | -1.4 | 1.06E-04 | 48.8   | -1.4 | 7.73E-01 |   |   |
| PPIP5K2      | 4.0    | 1.0 | 2.8    | -1.4 | 2.15E-03 | 2.6    | -1.5 | 5.94E-01 |   |   |
| PPTC7        | 19.3   | 1.0 | 13.3   | -1.4 | 1.47E-02 | 11.7   | -1.6 | 4.25E-01 |   |   |
| SCN7A        | 7.1    | 1.0 | 4.9    | -1.4 | 3.93E-02 | 6.4    | -1.1 | 8.58E-02 |   |   |
| EDNRB        | 10.7   | 1.0 | 7.4    | -1.5 | 5.29E-03 | 8.8    | -1.2 | 9.87E-02 |   |   |
| COL27A1      | 4.1    | 1.0 | 2.8    | -1.5 | 1.39E-02 | 3.7    | -1.1 | 3.76E-02 | √ | √ |
| FAM58A       | 14.6   | 1.0 | 10.1   | -1.5 | 3.53E-03 | 10.7   | -1.4 | 5.68E-01 |   |   |
| FGF7         | 5.1    | 1.0 | 3.5    | -1.5 | 2.30E-02 | 2.2    | -2.3 | 7.97E-03 |   |   |
| ATP2A2       | 510.0  | 1.0 | 350.7  | -1.5 | 2.79E-03 | 264.7  | -1.9 | 7.24E-02 |   |   |
| LOC100127983 | 20.3   | 1.0 | 14.0   | -1.5 | 7.31E-03 | 11.4   | -1.8 | 2.05E-01 |   |   |
| LIFR         | 4.8    | 1.0 | 3.3    | -1.5 | 1.46E-02 | 4.9    | 1.0  | 3.74E-02 | √ | √ |
| ACCN3        | 2.9    | 1.0 | 2.0    | -1.5 | 1.23E-02 | 2.2    | -1.3 | 4.24E-01 |   |   |
| PDZD2        | 11.6   | 1.0 | 7.9    | -1.5 | 1.92E-02 | 6.7    | -1.7 | 8.81E-02 |   |   |
| CD82         | 10.0   | 1.0 | 6.8    | -1.5 | 6.35E-03 | 6.2    | -1.6 | 6.01E-01 |   |   |
| OPLAH        | 13.8   | 1.0 | 9.5    | -1.5 | 1.09E-03 | 10.2   | -1.4 | 2.78E-01 |   |   |
| ENDOG        | 13.9   | 1.0 | 9.5    | -1.5 | 9.79E-05 | 8.9    | -1.6 | 5.17E-01 |   |   |
| KLHL38       | 21.1   | 1.0 | 14.4   | -1.5 | 1.77E-02 | 15.3   | -1.4 | 6.60E-01 |   |   |
| C9orf5       | 11.1   | 1.0 | 7.6    | -1.5 | 2.96E-03 | 6.6    | -1.7 | 1.78E-01 |   |   |
| MZT2B        | 46.7   | 1.0 | 31.8   | -1.5 | 6.85E-05 | 38.1   | -1.2 | 1.32E-01 |   |   |
| PLCXD3       | 15.0   | 1.0 | 10.2   | -1.5 | 1.37E-02 | 10.1   | -1.5 | 9.23E-01 |   |   |
| HRH2         | 5.3    | 1.0 | 3.6    | -1.5 | 4.26E-02 | 3.3    | -1.6 | 6.66E-01 |   |   |
| ITGA1        | 5.2    | 1.0 | 3.5    | -1.5 | 1.91E-02 | 3.2    | -1.6 | 5.94E-01 |   |   |
| NEGR1        | 3.1    | 1.0 | 2.1    | -1.5 | 1.62E-02 | 2.0    | -1.5 | 9.57E-01 |   |   |
| SLC25A30     | 29.6   | 1.0 | 20.0   | -1.5 | 2.66E-02 | 30.5   | 1.0  | 2.85E-02 | √ | √ |
| HSPB3        | 169.0  | 1.0 | 114.3  | -1.5 | 2.27E-03 | 117.7  | -1.4 | 7.44E-01 |   |   |
| ANOS         | 10.7   | 1.0 | 7.2    | -1.5 | 1.01E-02 | 6.6    | -1.6 | 4.26E-01 |   |   |
| CCDC69       | 28.4   | 1.0 | 19.0   | -1.5 | 8.87E-04 | 15.2   | -1.9 | 1.04E-01 |   |   |
| TUBB2C       | 153.3  | 1.0 | 102.8  | -1.5 | 9.06E-04 | 113.6  | -1.3 | 4.58E-01 |   |   |
| MRPS25       | 15.8   | 1.0 | 10.6   | -1.5 | 2.96E-03 | 12.0   | -1.3 | 2.53E-01 |   |   |
| PLCD3        | 11.6   | 1.0 | 7.7    | -1.5 | 2.06E-03 | 7.2    | -1.6 | 3.43E-01 |   |   |
| FSD2         | 17.3   | 1.0 | 11.4   | -1.5 | 2.18E-02 | 9.6    | -1.8 | 4.71E-01 |   |   |
| CTNNBIP1     | 10.2   | 1.0 | 6.7    | -1.5 | 1.65E-02 | 7.4    | -1.4 | 2.51E-01 |   |   |
| TPRKB        | 10.8   | 1.0 | 7.1    | -1.5 | 1.30E-03 | 7.6    | -1.4 | 7.17E-01 |   |   |
| HADHB        | 307.8  | 1.0 | 202.4  | -1.5 | 2.26E-04 | 186.8  | -1.6 | 4.72E-01 |   |   |
| NID1         | 25.4   | 1.0 | 16.7   | -1.5 | 1.20E-02 | 16.1   | -1.6 | 8.56E-01 |   |   |
| PHYHD1       | 7.6    | 1.0 | 5.0    | -1.5 | 2.45E-02 | 5.7    | -1.3 | 2.87E-01 |   |   |
| TKTL1        | 2.3    | 1.0 | 1.5    | -1.5 | 1.49E-02 | 1.8    | -1.3 | 3.23E-01 |   |   |
| AIF1L        | 11.7   | 1.0 | 7.7    | -1.5 | 1.49E-04 | 7.2    | -1.6 | 7.36E-01 |   |   |
| F8           | 14.9   | 1.0 | 9.8    | -1.5 | 6.45E-03 | 7.9    | -1.9 | 2.12E-01 |   |   |
| FAM101B      | 3.7    | 1.0 | 2.4    | -1.5 | 7.19E-03 | 2.6    | -1.5 | 7.40E-01 |   |   |
| AMD1         | 16.4   | 1.0 | 10.7   | -1.5 | 3.48E-04 | 12.0   | -1.4 | 4.51E-01 |   |   |
| SMTNL2       | 6.0    | 1.0 | 3.9    | -1.5 | 3.87E-02 | 2.9    | -2.1 | 9.44E-02 |   |   |
| ACSS1        | 32.2   | 1.0 | 20.9   | -1.5 | 1.56E-02 | 22.3   | -1.4 | 6.65E-01 |   |   |
| PTH1R        | 5.4    | 1.0 | 3.5    | -1.5 | 2.72E-03 | 3.4    | -1.6 | 9.09E-01 |   |   |
| COQ10A       | 66.0   | 1.0 | 42.8   | -1.5 | 3.20E-03 | 36.8   | -1.8 | 3.06E-01 |   |   |
| BIRC3        | 2.5    | 1.0 | 1.6    | -1.5 | 3.50E-02 | 2.6    | 1.0  | 5.19E-02 |   |   |
| CDH19        | 7.4    | 1.0 | 4.8    | -1.5 | 4.46E-02 | 5.3    | -1.4 | 5.77E-01 |   |   |
| PTGDS        | 1058.3 | 1.0 | 679.2  | -1.6 | 4.02E-03 | 864.7  | -1.2 | 1.50E-01 |   |   |
| CKM          | 1881.3 | 1.0 | 1206.3 | -1.6 | 1.47E-03 | 1163.2 | -1.6 | 7.54E-01 |   |   |
| ZNF703       | 2.6    | 1.0 | 1.6    | -1.6 | 1.98E-02 | 3.2    | 1.3  | 5.58E-03 |   |   |
| C3orf43      | 7.5    | 1.0 | 4.8    | -1.6 | 3.72E-02 | 5.7    | -1.3 | 4.35E-01 |   |   |
| GPT          | 13.3   | 1.0 | 8.4    | -1.6 | 1.53E-03 | 8.9    | -1.5 | 6.67E-01 |   |   |
| ITGB1BP3     | 260.6  | 1.0 | 165.2  | -1.6 | 3.83E-02 | 207.3  | -1.3 | 1.67E-01 |   |   |
| MPP3         | 8.9    | 1.0 | 5.6    | -1.6 | 6.53E-03 | 6.3    | -1.4 | 5.87E-01 |   |   |
| HIPK3        | 19.2   | 1.0 | 12.0   | -1.6 | 3.33E-02 | 10.0   | -1.9 | 4.26E-01 |   |   |
| FAM107A      | 27.7   | 1.0 | 17.4   | -1.6 | 6.19E-04 | 23.6   | -1.2 | 1.53E-01 |   |   |
| MID1IP1      | 9.2    | 1.0 | 5.8    | -1.6 | 3.98E-02 | 4.7    | -2.0 | 1.62E-01 |   |   |
| PALLD        | 148.5  | 1.0 | 92.9   | -1.6 | 3.01E-03 | 87.5   | -1.7 | 6.58E-01 |   |   |
| LNK1         | 2.1    | 1.0 | 1.3    | -1.6 | 2.67E-03 | 2.1    | -1.0 | 9.94E-02 |   |   |
| ENTPD6       | 29.8   | 1.0 | 18.6   | -1.6 | 2.69E-05 | 18.4   | -1.6 | 8.85E-01 |   |   |
| ASB10        | 9.5    | 1.0 | 6.0    | -1.6 | 2.38E-03 | 6.3    | -1.5 | 6.66E-01 |   |   |
| GPR17        | 6.9    | 1.0 | 4.3    | -1.6 | 2.10E-02 | 4.6    | -1.5 | 5.16E-01 |   |   |
| PYGM         | 26.0   | 1.0 | 16.2   | -1.6 | 9.64E-04 | 19.0   | -1.4 | 3.90E-01 |   |   |
| HIF3A        | 19.3   | 1.0 | 12.0   | -1.6 | 3.31E-03 | 13.3   | -1.5 | 4.61E-01 |   |   |
| CCDC85A      | 2.2    | 1.0 | 1.4    | -1.6 | 5.05E-03 | 1.8    | -1.2 | 4.99E-02 |   | √ |
| TBX3         | 4.6    | 1.0 | 2.9    | -1.6 | 4.11E-03 | 2.5    | -1.9 | 3.48E-01 |   |   |
| SYNE2        | 44.5   | 1.0 | 27.6   | -1.6 | 1.15E-03 | 28.5   | -1.6 | 8.03E-01 |   |   |
| CA4          | 8.4    | 1.0 | 5.2    | -1.6 | 4.28E-02 | 11.9   | 1.4  | 2.57E-02 |   |   |
| FAM65C       | 4.6    | 1.0 | 2.8    | -1.6 | 1.46E-02 | 3.0    | -1.5 | 5.93E-01 |   |   |
| HMOX2        | 35.6   | 1.0 | 21.8   | -1.6 | 1.26E-04 | 21.4   | -1.7 | 8.49E-01 |   |   |
| KLF15        | 15.3   | 1.0 | 9.4    | -1.6 | 1.27E-02 | 17.8   | 1.2  | 3.14E-02 |   |   |
| MZT2A        | 35.9   | 1.0 | 22.0   | -1.6 | 8.01E-03 | 25.3   | -1.4 | 4.22E-01 |   |   |
| C13orf15     | 27.8   | 1.0 | 16.9   | -1.6 | 2.40E-03 | 43.3   | 1.6  | 5.78E-04 |   |   |
| LPAR3        | 2.7    | 1.0 | 1.6    | -1.7 | 1.82E-03 | 1.6    | -1.7 | 8.49E-01 |   |   |
| COMTD1       | 8.3    | 1.0 | 5.0    | -1.7 | 8.18E-04 | 6.1    | -1.4 | 2.45E-01 |   |   |
| ASIP         | 5.1    | 1.0 | 3.1    | -1.7 | 1.45E-02 | 3.4    | -1.5 | 6.34E-01 |   |   |
| KIAA0040     | 5.9    | 1.0 | 3.6    | -1.7 | 9.66E-03 | 4.8    | -1.2 | 8.22E-02 |   |   |
| PDE7A        | 24.0   | 1.0 | 14.5   | -1.7 | 4.70E-04 | 26.8   | 1.1  | 1.52E-03 |   |   |
| CACNA2D3     | 6.3    | 1.0 | 3.8    | -1.7 | 8.10E-03 | 3.5    | -1.8 | 5.80E-01 |   |   |
| PGAM2        | 256.2  | 1.0 | 154.4  | -1.7 | 3.18E-05 | 194.0  | -1.3 | 1.11E-01 |   |   |
| PPL          | 3.1    | 1.0 | 1.9    | -1.7 | 8.01E-04 | 1.7    | -1.9 | 3.96E-01 |   |   |
| CREB3L1      | 11.1   | 1.0 | 6.7    | -1.7 | 2.67E-04 | 8.0    | -1.4 | 1.02E-01 |   |   |
| MLPH         | 6.1    | 1.0 | 3.6    | -1.7 | 1.59E-02 | 4.8    | -1.3 | 1.04E-01 |   |   |

|              |       |     |       |      |          |       |       |          |   |   |
|--------------|-------|-----|-------|------|----------|-------|-------|----------|---|---|
| SHISA4       | 43.9  | 1.0 | 26.1  | -1.7 | 1.20E-02 | 31.0  | -1.4  | 7.95E-02 |   |   |
| CSDC2        | 91.6  | 1.0 | 54.5  | -1.7 | 3.71E-03 | 63.8  | -1.4  | 3.99E-01 |   |   |
| KBTBD10      | 61.2  | 1.0 | 35.9  | -1.7 | 3.67E-03 | 43.5  | -1.4  | 3.04E-01 |   |   |
| ABCA9        | 6.6   | 1.0 | 3.9   | -1.7 | 4.94E-03 | 3.6   | -1.8  | 6.10E-01 |   |   |
| EIF4EBP1     | 11.9  | 1.0 | 7.0   | -1.7 | 5.73E-04 | 6.3   | -1.9  | 2.58E-01 |   |   |
| LOC100131199 | 7.7   | 1.0 | 4.5   | -1.7 | 5.51E-03 | 4.0   | -1.9  | 3.70E-01 |   |   |
| SMYD1        | 80.5  | 1.0 | 46.5  | -1.7 | 9.16E-05 | 41.6  | -1.9  | 4.14E-01 |   |   |
| FABP5        | 100.1 | 1.0 | 57.3  | -1.7 | 2.05E-03 | 60.7  | -1.6  | 6.96E-01 |   |   |
| PTDSS1       | 57.3  | 1.0 | 32.8  | -1.7 | 1.13E-04 | 34.5  | -1.7  | 8.06E-01 |   |   |
| PLIN5        | 14.2  | 1.0 | 8.1   | -1.7 | 6.92E-04 | 8.0   | -1.8  | 9.12E-01 |   |   |
| ASB14        | 2.2   | 1.0 | 1.3   | -1.8 | 4.70E-02 | 1.3   | -1.7  | 6.54E-01 |   |   |
| HOGA1        | 7.1   | 1.0 | 4.0   | -1.8 | 2.26E-02 | 3.6   | -2.0  | 3.69E-01 |   |   |
| TLR2         | 1.3   | 1.0 | 0.7   | -1.8 | 2.20E-03 | 1.0   | -1.2  | 3.05E-01 |   |   |
| GPR116       | 25.9  | 1.0 | 14.5  | -1.8 | 5.29E-07 | 16.7  | -1.5  | 4.91E-01 |   |   |
| WDR62        | 3.7   | 1.0 | 2.1   | -1.8 | 1.54E-02 | 3.0   | -1.2  | 8.48E-02 |   |   |
| NQO2         | 19.7  | 1.0 | 10.9  | -1.8 | 5.85E-03 | 10.4  | -1.9  | 6.32E-01 |   |   |
| TIMP4        | 10.5  | 1.0 | 5.7   | -1.8 | 2.12E-02 | 6.3   | -1.7  | 6.46E-01 |   |   |
| AASS         | 5.2   | 1.0 | 2.8   | -1.8 | 1.14E-03 | 2.5   | -2.1  | 4.10E-01 |   |   |
| CADPS2       | 2.8   | 1.0 | 1.5   | -1.9 | 6.17E-03 | 1.4   | -2.0  | 6.47E-01 |   |   |
| MTUS2        | 30.1  | 1.0 | 16.1  | -1.9 | 6.25E-04 | 18.2  | -1.7  | 3.87E-01 |   |   |
| F13A1        | 27.9  | 1.0 | 14.9  | -1.9 | 4.05E-02 | 7.7   | -3.6  | 1.71E-01 |   |   |
| ZNF366       | 2.3   | 1.0 | 1.2   | -1.9 | 3.41E-04 | 1.4   | -1.7  | 7.44E-01 |   |   |
| C3           | 44.8  | 1.0 | 23.8  | -1.9 | 1.24E-02 | 19.0  | -2.4  | 4.65E-01 |   |   |
| EGFR         | 2.3   | 1.0 | 1.2   | -1.9 | 7.68E-04 | 1.6   | -1.4  | 1.90E-01 |   |   |
| RNF144B      | 2.9   | 1.0 | 1.5   | -1.9 | 2.64E-04 | 1.8   | -1.6  | 3.76E-01 |   |   |
| RASL10B      | 6.4   | 1.0 | 3.4   | -1.9 | 4.02E-03 | 2.8   | -2.3  | 1.38E-01 |   |   |
| KCNJ11       | 3.3   | 1.0 | 1.7   | -2.0 | 2.50E-04 | 2.2   | -1.5  | 1.05E-01 |   |   |
| C4orf31      | 2.3   | 1.0 | 1.2   | -2.0 | 2.85E-03 | 1.2   | -2.0  | 9.75E-01 |   |   |
| ADRB1        | 7.5   | 1.0 | 3.7   | -2.0 | 1.12E-02 | 4.3   | -1.7  | 6.11E-01 |   |   |
| EPB41L4B     | 2.5   | 1.0 | 1.2   | -2.1 | 5.04E-03 | 1.5   | -1.7  | 3.02E-01 |   |   |
| SLC26A9      | 5.9   | 1.0 | 2.8   | -2.1 | 5.04E-04 | 3.9   | -1.5  | 1.08E-02 |   | ▼ |
| PLP1         | 2.9   | 1.0 | 1.4   | -2.1 | 8.63E-03 | 1.9   | -1.5  | 3.16E-01 |   |   |
| GPIHBP1      | 6.1   | 1.0 | 2.8   | -2.1 | 5.19E-04 | 5.3   | -1.1  | 3.20E-02 |   | ▼ |
| PVRL1        | 4.4   | 1.0 | 2.1   | -2.1 | 8.84E-03 | 1.9   | -2.3  | 3.82E-01 |   |   |
| KCND3        | 4.0   | 1.0 | 1.8   | -2.2 | 7.79E-04 | 1.5   | -2.6  | 2.15E-01 |   |   |
| FKBP5        | 42.9  | 1.0 | 19.8  | -2.2 | 8.92E-04 | 55.6  | 1.3   | 1.17E-02 |   |   |
| PPP1R1A      | 27.1  | 1.0 | 12.5  | -2.2 | 7.44E-03 | 15.2  | -1.8  | 4.09E-01 |   |   |
| TUBA8        | 54.2  | 1.0 | 24.9  | -2.2 | 3.85E-03 | 34.2  | -1.6  | 7.20E-02 |   |   |
| SLC5A1       | 38.3  | 1.0 | 17.6  | -2.2 | 1.71E-04 | 19.8  | -1.9  | 5.27E-01 |   |   |
| ADAMTS9      | 4.4   | 1.0 | 2.0   | -2.2 | 1.42E-02 | 2.1   | -2.1  | 7.27E-01 |   |   |
| CD300LG      | 6.1   | 1.0 | 2.7   | -2.2 | 8.44E-04 | 4.0   | -1.5  | 2.91E-01 |   |   |
| SH3RF2       | 74.4  | 1.0 | 33.1  | -2.2 | 3.19E-04 | 43.0  | -1.7  | 7.55E-03 |   | ▼ |
| ANXA3        | 21.7  | 1.0 | 9.6   | -2.2 | 8.16E-05 | 13.0  | -1.7  | 2.23E-01 |   |   |
| NPTX2        | 3.9   | 1.0 | 1.7   | -2.3 | 1.77E-02 | 1.6   | -2.4  | 8.19E-01 |   |   |
| FAM155B      | 9.1   | 1.0 | 4.0   | -2.3 | 5.53E-03 | 8.4   | -1.1  | 5.20E-02 |   |   |
| ADAM11       | 3.6   | 1.0 | 1.5   | -2.3 | 5.76E-03 | 2.2   | -1.6  | 2.76E-01 |   |   |
| GRB14        | 4.6   | 1.0 | 2.0   | -2.3 | 2.06E-03 | 1.9   | -2.4  | 9.19E-01 |   |   |
| CD163        | 18.2  | 1.0 | 7.7   | -2.3 | 2.49E-02 | 6.2   | -2.9  | 7.09E-01 |   |   |
| FAM46B       | 8.6   | 1.0 | 3.5   | -2.4 | 5.07E-03 | 4.2   | -2.0  | 5.11E-01 |   |   |
| METTL7B      | 7.6   | 1.0 | 3.1   | -2.5 | 4.68E-03 | 3.7   | -2.1  | 6.42E-01 |   |   |
| AQP3         | 8.7   | 1.0 | 3.5   | -2.5 | 8.02E-03 | 4.8   | -1.8  | 1.97E-01 |   |   |
| CPLX3        | 3.3   | 1.0 | 1.3   | -2.5 | 7.13E-03 | 2.3   | -1.4  | 7.07E-02 |   |   |
| MT1X         | 39.5  | 1.0 | 15.6  | -2.5 | 4.70E-02 | 66.6  | 1.7   | 7.77E-03 |   |   |
| SUSD4        | 3.5   | 1.0 | 1.4   | -2.6 | 4.29E-02 | 1.6   | -2.2  | 5.12E-01 |   |   |
| FIGF         | 7.5   | 1.0 | 2.9   | -2.6 | 9.08E-03 | 2.3   | -3.2  | 4.92E-01 |   |   |
| S1PR3        | 9.2   | 1.0 | 3.5   | -2.6 | 1.61E-03 | 4.0   | -2.3  | 1.02E-01 |   |   |
| AQP4         | 2.6   | 1.0 | 1.0   | -2.7 | 3.30E-02 | 0.9   | -3.0  | 8.33E-01 |   |   |
| MBNL3        | 1.8   | 1.0 | 0.7   | -2.7 | 1.18E-02 | 0.8   | -2.3  | 3.32E-01 |   |   |
| EPN3         | 3.2   | 1.0 | 1.2   | -2.7 | 3.57E-03 | 1.5   | -2.1  | 1.74E-01 |   |   |
| CPNE4        | 9.7   | 1.0 | 3.6   | -2.7 | 2.08E-02 | 3.9   | -2.5  | 6.25E-01 |   |   |
| ART3         | 39.5  | 1.0 | 14.5  | -2.7 | 2.11E-06 | 16.5  | -2.4  | 4.86E-01 |   |   |
| LRRN3        | 2.2   | 1.0 | 0.8   | -2.7 | 4.60E-02 | 0.6   | -3.4  | 4.00E-01 |   |   |
| CPAMD8       | 4.2   | 1.0 | 1.5   | -2.8 | 8.11E-05 | 1.6   | -2.6  | 7.77E-01 |   |   |
| ADAMTS15     | 5.4   | 1.0 | 1.9   | -2.8 | 7.71E-04 | 2.9   | -1.8  | 2.34E-03 |   | ▼ |
| LCN10        | 3.2   | 1.0 | 1.1   | -2.8 | 1.19E-03 | 1.2   | -2.7  | 8.74E-01 |   |   |
| MYL7         | 526.1 | 1.0 | 182.0 | -2.9 | 2.06E-02 | 497.5 | -1.1  | 1.45E-03 | ▼ | ▼ |
| BMP7         | 2.3   | 1.0 | 0.8   | -3.0 | 1.85E-03 | 0.5   | -4.9  | 1.22E-01 |   |   |
| C19orf33     | 3.0   | 1.0 | 1.0   | -3.1 | 1.60E-03 | 1.0   | -3.0  | 9.27E-01 |   |   |
| ITLN1        | 1.0   | 1.0 | 0.3   | -3.2 | 4.54E-02 | 0.8   | -1.3  | 2.78E-01 |   |   |
| MT1A         | 1.7   | 1.0 | 0.5   | -3.3 | 4.59E-02 | 8.9   | 5.2   | 1.23E-02 |   |   |
| CYP4B1       | 11.9  | 1.0 | 3.6   | -3.3 | 1.97E-03 | 6.7   | -1.8  | 2.66E-01 |   |   |
| SERPINA3     | 29.0  | 1.0 | 8.8   | -3.3 | 7.54E-03 | 9.2   | -3.1  | 8.90E-01 |   |   |
| LCN6         | 5.9   | 1.0 | 1.7   | -3.4 | 3.25E-04 | 1.5   | -4.0  | 2.71E-01 |   |   |
| PRODH        | 13.5  | 1.0 | 3.9   | -3.5 | 1.81E-03 | 3.7   | -3.6  | 7.67E-01 |   |   |
| FCN3         | 10.0  | 1.0 | 2.9   | -3.5 | 3.49E-03 | 1.9   | -5.3  | 1.40E-01 |   |   |
| SGPP2        | 5.2   | 1.0 | 1.5   | -3.5 | 3.46E-03 | 1.3   | -3.9  | 8.26E-01 |   |   |
| HOPX         | 12.4  | 1.0 | 3.4   | -3.7 | 3.37E-02 | 3.0   | -4.1  | 8.12E-01 |   |   |
| SLCO4A1      | 7.7   | 1.0 | 2.1   | -3.7 | 2.78E-05 | 5.2   | -1.5  | 8.11E-03 |   | ▼ |
| CHST9        | 2.9   | 1.0 | 0.8   | -3.7 | 7.73E-04 | 1.1   | -2.6  | 3.15E-01 |   |   |
| CA14         | 3.7   | 1.0 | 0.8   | -4.7 | 1.07E-03 | 1.1   | -3.5  | 3.24E-01 |   |   |
| CHRDL2       | 4.1   | 1.0 | 0.9   | -4.8 | 1.33E-02 | 1.7   | -2.4  | 1.64E-01 |   |   |
| TUBA3D       | 30.8  | 1.0 | 6.2   | -5.0 | 4.87E-05 | 14.9  | -2.1  | 5.06E-02 |   |   |
| HMGCS2       | 10.6  | 1.0 | 1.9   | -5.5 | 4.19E-02 | 1.2   | -8.9  | 5.98E-01 |   |   |
| MYH6         | 522.6 | 1.0 | 66.8  | -7.8 | 4.54E-04 | 46.0  | -11.4 | 7.50E-02 |   |   |

|        |      |     |     |      |          |      |      |          |  |   |
|--------|------|-----|-----|------|----------|------|------|----------|--|---|
| DHR57C | 14.0 | 1.0 | 1.7 | -8.1 | 9.04E-03 | 4.9  | -2.8 | 1.29E-01 |  |   |
| TUBA3E | 24.8 | 1.0 | 2.9 | -8.5 | 5.25E-05 | 10.5 | -2.4 | 4.29E-02 |  | v |

Table S12. Mean normalized read counts, fold change (compared to NF hearts mean value) and P values of mRNAs that are differentially expression in NICM LV sample:

| Transcript | NF mean (RPKM+0.1) | Fold Change (vs NF) | NICM pre-LVAD mean (RPKM+0.1) | Fold Change (vs NF) | P value (NF vs NICM) | NICM post-LVAD mean (RPKM+0.1) | Fold Change (vs NF) | P value (NICM pre vs post LVAD) | Normalized by LVAD | Improved by LVAD |
|------------|--------------------|---------------------|-------------------------------|---------------------|----------------------|--------------------------------|---------------------|---------------------------------|--------------------|------------------|
| HBA1       | 2.0                | 1.0                 | 98.5                          | 48.2                | 4.66E-02             | 16.0                           | 7.8                 | 9.00E-02                        |                    |                  |
| NPPB       | 17.2               | 1.0                 | 409.5                         | 23.8                | 8.33E-03             | 150.8                          | 8.8                 | 3.34E-01                        |                    |                  |
| NPPA       | 99.5               | 1.0                 | 1918.8                        | 19.3                | 4.62E-02             | 225.6                          | 2.3                 | 1.09E-01                        |                    |                  |
| PENK       | 0.3                | 1.0                 | 3.8                           | 11.8                | 1.37E-02             | 9.5                            | 29.9                | 3.63E-01                        |                    |                  |
| SFRP4      | 0.5                | 1.0                 | 5.2                           | 11.4                | 1.52E-02             | 7.0                            | 15.3                | 5.72E-01                        |                    |                  |
| MXRA5      | 0.7                | 1.0                 | 5.2                           | 7.6                 | 9.02E-04             | 6.4                            | 9.3                 | 8.40E-01                        |                    |                  |
| RGS4       | 0.4                | 1.0                 | 2.6                           | 7.3                 | 1.77E-02             | 0.6                            | 1.7                 | 7.53E-02                        |                    |                  |
| FMOD       | 3.4                | 1.0                 | 23.3                          | 6.8                 | 9.12E-03             | 27.3                           | 8.0                 | 9.84E-01                        |                    |                  |
| WNT9A      | 0.8                | 1.0                 | 5.2                           | 6.7                 | 3.71E-04             | 5.8                            | 7.5                 | 9.46E-01                        |                    |                  |
| HAPLN1     | 0.2                | 1.0                 | 1.4                           | 5.8                 | 1.26E-03             | 1.0                            | 4.1                 | 5.08E-01                        |                    |                  |
| UCHL1      | 2.1                | 1.0                 | 11.4                          | 5.5                 | 8.60E-03             | 11.0                           | 5.3                 | 6.76E-01                        |                    |                  |
| LUM        | 24.8               | 1.0                 | 127.4                         | 5.1                 | 3.26E-03             | 140.9                          | 5.7                 | 4.06E-01                        |                    |                  |
| ITGBL1     | 1.0                | 1.0                 | 5.1                           | 4.9                 | 1.13E-02             | 5.2                            | 5.0                 | 5.34E-01                        |                    |                  |
| ASP        | 4.9                | 1.0                 | 23.7                          | 4.8                 | 4.53E-03             | 18.0                           | 3.6                 | 4.19E-01                        |                    |                  |
| CCDC80     | 8.9                | 1.0                 | 42.4                          | 4.8                 | 3.87E-03             | 50.5                           | 5.7                 | 7.42E-01                        |                    |                  |
| GAP43      | 0.2                | 1.0                 | 1.1                           | 4.7                 | 2.90E-02             | 0.7                            | 3.1                 | 3.13E-01                        |                    |                  |
| AEBP1      | 5.1                | 1.0                 | 23.5                          | 4.6                 | 2.96E-02             | 31.0                           | 6.1                 | 5.17E-01                        |                    |                  |
| COL14A1    | 1.9                | 1.0                 | 9.0                           | 4.6                 | 2.85E-02             | 13.0                           | 6.7                 | 6.06E-01                        |                    |                  |
| C16orf89   | 1.0                | 1.0                 | 4.4                           | 4.5                 | 2.50E-03             | 3.4                            | 3.5                 | 5.83E-02                        |                    |                  |
| SERPINE2   | 4.4                | 1.0                 | 19.6                          | 4.5                 | 1.09E-04             | 16.9                           | 3.8                 | 3.87E-01                        |                    |                  |
| PI16       | 5.4                | 1.0                 | 24.0                          | 4.5                 | 8.68E-03             | 21.7                           | 4.0                 | 5.97E-01                        |                    |                  |
| FAP        | 0.5                | 1.0                 | 2.3                           | 4.3                 | 1.91E-03             | 3.4                            | 6.5                 | 3.59E-01                        |                    |                  |
| LTBP2      | 6.1                | 1.0                 | 26.5                          | 4.3                 | 1.29E-03             | 23.0                           | 3.8                 | 4.50E-01                        |                    |                  |
| TMEM119    | 0.2                | 1.0                 | 0.9                           | 4.1                 | 2.34E-02             | 1.5                            | 6.8                 | 2.92E-01                        |                    |                  |
| OGDHL      | 0.5                | 1.0                 | 2.2                           | 4.1                 | 9.44E-04             | 1.4                            | 2.7                 | 2.17E-01                        |                    |                  |
| PROM1      | 0.6                | 1.0                 | 2.2                           | 4.0                 | 5.56E-03             | 1.4                            | 2.5                 | 3.56E-01                        |                    |                  |
| TNC        | 1.1                | 1.0                 | 4.2                           | 3.9                 | 2.70E-02             | 6.8                            | 6.3                 | 3.78E-01                        |                    |                  |
| OC10012948 | 0.3                | 1.0                 | 1.2                           | 3.9                 | 6.15E-03             | 1.2                            | 3.9                 | 9.79E-01                        |                    |                  |
| TNFRSF11B  | 1.6                | 1.0                 | 6.1                           | 3.7                 | 4.36E-02             | 4.8                            | 2.9                 | 2.61E-01                        |                    |                  |
| THY1       | 0.6                | 1.0                 | 2.3                           | 3.7                 | 3.09E-04             | 2.6                            | 4.1                 | 1.41E-01                        |                    |                  |
| CP         | 0.6                | 1.0                 | 2.1                           | 3.7                 | 2.28E-02             | 1.7                            | 2.9                 | 1.31E-01                        |                    |                  |
| CTGF       | 9.1                | 1.0                 | 32.9                          | 3.6                 | 2.46E-02             | 103.2                          | 11.4                | 4.64E-01                        |                    |                  |
| HIST1H2AK  | 0.7                | 1.0                 | 2.4                           | 3.6                 | 1.27E-04             | 1.5                            | 2.3                 | 1.14E-02                        |                    | √                |
| PHLDA1     | 1.8                | 1.0                 | 6.4                           | 3.6                 | 1.61E-02             | 6.3                            | 3.5                 | 2.08E-01                        |                    |                  |
| DPT        | 15.0               | 1.0                 | 52.9                          | 3.5                 | 4.23E-04             | 53.1                           | 3.5                 | 2.93E-01                        |                    |                  |
| SLC30A2    | 1.1                | 1.0                 | 3.8                           | 3.5                 | 6.08E-03             | 1.2                            | 1.1                 | 1.32E-02                        |                    | √                |
| PTN        | 8.9                | 1.0                 | 30.6                          | 3.5                 | 3.54E-03             | 42.2                           | 4.8                 | 7.95E-01                        |                    |                  |
| SSC5D      | 0.7                | 1.0                 | 2.4                           | 3.3                 | 3.54E-04             | 2.5                            | 3.5                 | 5.16E-01                        |                    |                  |
| MME        | 0.6                | 1.0                 | 2.1                           | 3.3                 | 1.25E-02             | 1.7                            | 2.6                 | 2.13E-01                        |                    |                  |
| IFI44L     | 1.0                | 1.0                 | 3.4                           | 3.3                 | 2.34E-02             | 2.6                            | 2.5                 | 2.92E-01                        |                    |                  |
| LEPREL1    | 0.8                | 1.0                 | 2.6                           | 3.3                 | 3.55E-02             | 2.0                            | 2.5                 | 1.16E-01                        |                    |                  |
| SCUBE2     | 0.4                | 1.0                 | 1.3                           | 3.2                 | 8.90E-04             | 2.4                            | 6.0                 | 5.30E-01                        |                    |                  |
| PDE8B      | 0.6                | 1.0                 | 2.0                           | 3.2                 | 1.37E-04             | 2.1                            | 3.4                 | 8.98E-01                        |                    |                  |
| BEX1       | 2.3                | 1.0                 | 7.3                           | 3.1                 | 4.36E-03             | 3.8                            | 1.6                 | 1.74E-02                        |                    | √                |
| COLQ       | 2.7                | 1.0                 | 8.4                           | 3.1                 | 7.48E-04             | 4.2                            | 1.6                 | 8.32E-02                        |                    |                  |
| THBS4      | 27.1               | 1.0                 | 81.9                          | 3.0                 | 1.53E-02             | 208.3                          | 7.7                 | 1.77E-01                        |                    |                  |
| MFAP4      | 21.7               | 1.0                 | 64.9                          | 3.0                 | 2.55E-02             | 65.3                           | 3.0                 | 3.20E-01                        |                    |                  |
| CPXM2      | 1.1                | 1.0                 | 3.4                           | 3.0                 | 2.69E-02             | 3.9                            | 3.4                 | 3.73E-01                        |                    |                  |
| OMD        | 2.9                | 1.0                 | 8.7                           | 3.0                 | 2.93E-02             | 8.5                            | 2.9                 | 5.53E-01                        |                    |                  |
| NAP1L3     | 1.1                | 1.0                 | 3.3                           | 3.0                 | 2.45E-04             | 1.7                            | 1.5                 | 1.89E-02                        |                    | √                |
| OLFML2B    | 0.7                | 1.0                 | 2.1                           | 3.0                 | 2.33E-02             | 2.2                            | 3.1                 | 1.84E-01                        |                    |                  |
| MDK        | 1.7                | 1.0                 | 5.0                           | 2.9                 | 3.96E-05             | 7.4                            | 4.4                 | 2.60E-01                        |                    |                  |
| SYTL2      | 1.3                | 1.0                 | 3.7                           | 2.9                 | 2.68E-03             | 2.2                            | 1.8                 | 3.56E-02                        |                    | √                |
| NT5E       | 0.9                | 1.0                 | 2.6                           | 2.9                 | 8.82E-03             | 1.7                            | 1.9                 | 9.44E-02                        |                    |                  |
| PCOLCE2    | 16.5               | 1.0                 | 47.9                          | 2.9                 | 3.26E-03             | 27.7                           | 1.7                 | 5.19E-02                        |                    |                  |
| COL1A1     | 9.4                | 1.0                 | 27.3                          | 2.9                 | 1.21E-02             | 37.5                           | 4.0                 | 4.36E-01                        |                    |                  |
| F2R        | 3.6                | 1.0                 | 10.3                          | 2.8                 | 6.58E-04             | 15.7                           | 4.4                 | 6.89E-01                        |                    |                  |
| IER3       | 9.5                | 1.0                 | 26.4                          | 2.8                 | 2.26E-05             | 29.1                           | 3.1                 | 2.43E-01                        |                    |                  |
| BGN        | 24.8               | 1.0                 | 69.3                          | 2.8                 | 2.00E-02             | 67.6                           | 2.7                 | 4.26E-01                        |                    |                  |
| COL1A2     | 20.3               | 1.0                 | 56.4                          | 2.8                 | 9.42E-03             | 68.6                           | 3.4                 | 4.13E-01                        |                    |                  |
| SMOC2      | 8.4                | 1.0                 | 23.2                          | 2.7                 | 3.84E-04             | 29.5                           | 3.5                 | 6.41E-01                        |                    |                  |
| SULF1      | 2.6                | 1.0                 | 6.9                           | 2.7                 | 3.02E-02             | 5.7                            | 2.2                 | 1.92E-01                        |                    |                  |
| ISLR       | 4.3                | 1.0                 | 11.5                          | 2.7                 | 7.57E-04             | 8.3                            | 1.9                 | 5.07E-02                        |                    |                  |
| LOXL1      | 4.4                | 1.0                 | 11.9                          | 2.7                 | 7.44E-04             | 8.8                            | 2.0                 | 2.38E-01                        |                    |                  |
| GATM       | 6.6                | 1.0                 | 17.6                          | 2.6                 | 3.54E-02             | 12.1                           | 1.8                 | 2.33E-01                        |                    |                  |
| THBS2      | 2.6                | 1.0                 | 7.0                           | 2.6                 | 1.10E-02             | 4.8                            | 1.8                 | 1.31E-01                        |                    |                  |
| SNCA       | 0.8                | 1.0                 | 2.1                           | 2.6                 | 1.93E-03             | 1.6                            | 1.9                 | 2.15E-01                        |                    |                  |
| ECM2       | 2.9                | 1.0                 | 7.6                           | 2.6                 | 2.43E-02             | 7.0                            | 2.4                 | 3.94E-01                        |                    |                  |
| SVEP1      | 1.2                | 1.0                 | 3.2                           | 2.6                 | 3.01E-03             | 3.2                            | 2.6                 | 2.47E-01                        |                    |                  |
| CYP1B1     | 3.8                | 1.0                 | 9.9                           | 2.6                 | 1.48E-02             | 20.4                           | 5.3                 | 7.83E-01                        |                    |                  |
| BMP4       | 1.8                | 1.0                 | 4.7                           | 2.6                 | 9.73E-04             | 6.7                            | 3.7                 | 7.27E-01                        |                    |                  |
| CLU        | 23.5               | 1.0                 | 60.3                          | 2.6                 | 5.41E-04             | 65.2                           | 2.8                 | 3.08E-01                        |                    |                  |
| C1QTNF7    | 0.6                | 1.0                 | 1.6                           | 2.5                 | 1.47E-02             | 1.0                            | 1.6                 | 8.93E-02                        |                    |                  |
| COL3A1     | 21.4               | 1.0                 | 54.7                          | 2.5                 | 2.13E-02             | 77.5                           | 3.6                 | 7.00E-01                        |                    |                  |
| COL8A1     | 3.5                | 1.0                 | 8.8                           | 2.5                 | 6.01E-03             | 8.8                            | 2.5                 | 7.85E-01                        |                    |                  |
| IRX6       | 3.1                | 1.0                 | 7.9                           | 2.5                 | 6.11E-03             | 5.4                            | 1.7                 | 8.25E-02                        |                    |                  |
| DACT1      | 0.7                | 1.0                 | 1.7                           | 2.5                 | 1.38E-02             | 1.1                            | 1.6                 | 7.96E-02                        |                    |                  |
| OAS1       | 1.4                | 1.0                 | 3.4                           | 2.5                 | 2.28E-02             | 2.2                            | 1.6                 | 9.68E-02                        |                    |                  |
| PRELP      | 11.7               | 1.0                 | 29.5                          | 2.5                 | 1.39E-02             | 36.8                           | 3.1                 | 6.66E-01                        |                    |                  |
| APLP1      | 2.1                | 1.0                 | 5.3                           | 2.5                 | 2.44E-04             | 3.4                            | 1.6                 | 1.68E-02                        |                    | √                |
| ZMYND17    | 1.4                | 1.0                 | 3.4                           | 2.5                 | 2.12E-04             | 2.7                            | 1.9                 | 2.15E-01                        |                    |                  |
| TGFB2      | 0.7                | 1.0                 | 1.6                           | 2.5                 | 5.06E-03             | 2.3                            | 3.5                 | 6.40E-01                        |                    |                  |
| ANKRD33B   | 1.0                | 1.0                 | 2.5                           | 2.5                 | 1.75E-03             | 1.7                            | 1.7                 | 6.83E-03                        |                    | √                |
| IFI6       | 3.4                | 1.0                 | 8.2                           | 2.4                 | 4.65E-02             | 6.7                            | 2.0                 | 3.18E-01                        |                    |                  |



|            |        |     |        |     |          |        |      |          |   |   |
|------------|--------|-----|--------|-----|----------|--------|------|----------|---|---|
| COL16A1    | 2.8    | 1.0 | 6.7    | 2.4 | 8.14E-03 | 7.5    | 2.7  | 6.99E-01 |   |   |
| CTSK       | 3.3    | 1.0 | 7.9    | 2.4 | 2.55E-02 | 15.3   | 4.6  | 2.94E-01 |   |   |
| SCN2B      | 3.3    | 1.0 | 7.9    | 2.4 | 2.62E-05 | 3.5    | 1.0  | 6.36E-04 | v | v |
| CILP       | 3.5    | 1.0 | 8.2    | 2.4 | 3.84E-02 | 17.9   | 5.1  | 1.38E-01 |   |   |
| SNAP47     | 6.3    | 1.0 | 14.9   | 2.4 | 4.54E-05 | 12.3   | 1.9  | 2.16E-02 |   |   |
| NCRNA00152 | 1.8    | 1.0 | 4.1    | 2.3 | 1.13E-02 | 4.1    | 2.3  | 2.84E-01 |   |   |
| SLC6A6     | 6.1    | 1.0 | 14.3   | 2.3 | 3.30E-02 | 6.7    | 1.1  | 9.17E-02 |   |   |
| NRP2       | 0.9    | 1.0 | 2.0    | 2.3 | 1.40E-02 | 1.5    | 1.8  | 9.24E-02 |   |   |
| OAS2       | 1.9    | 1.0 | 4.4    | 2.3 | 3.44E-02 | 3.4    | 1.8  | 1.82E-01 |   |   |
| SMAD7      | 3.2    | 1.0 | 7.3    | 2.3 | 5.41E-05 | 6.9    | 2.2  | 2.12E-01 |   |   |
| FNDC1      | 0.5    | 1.0 | 1.1    | 2.3 | 8.59E-04 | 2.2    | 4.6  | 1.26E-01 |   |   |
| ANTXR1     | 5.1    | 1.0 | 11.8   | 2.3 | 2.54E-02 | 12.3   | 2.4  | 3.46E-01 |   |   |
| FAM107B    | 1.2    | 1.0 | 2.8    | 2.3 | 9.78E-03 | 2.7    | 2.2  | 1.17E-01 |   |   |
| MX2        | 1.7    | 1.0 | 3.9    | 2.3 | 1.30E-02 | 2.6    | 1.5  | 7.40E-02 |   |   |
| C7orf41    | 4.3    | 1.0 | 9.7    | 2.3 | 1.56E-04 | 9.2    | 2.1  | 2.96E-01 |   |   |
| BAMBI      | 4.5    | 1.0 | 10.1   | 2.2 | 3.48E-04 | 12.7   | 2.8  | 5.68E-01 |   |   |
| EGR1       | 3.9    | 1.0 | 8.8    | 2.2 | 4.57E-02 | 127.0  | 32.2 | 6.75E-01 |   |   |
| SCARA3     | 1.0    | 1.0 | 2.2    | 2.2 | 6.21E-03 | 1.8    | 1.8  | 9.43E-02 |   |   |
| C14orf132  | 0.4    | 1.0 | 1.0    | 2.2 | 7.91E-03 | 2.2    | 5.0  | 7.79E-02 |   |   |
| FN1        | 34.4   | 1.0 | 76.4   | 2.2 | 2.91E-02 | 78.3   | 2.3  | 6.83E-01 |   |   |
| ENAM       | 1.3    | 1.0 | 2.9    | 2.2 | 6.80E-04 | 2.1    | 1.6  | 1.54E-01 |   |   |
| MYO1D      | 1.9    | 1.0 | 4.3    | 2.2 | 2.61E-02 | 5.6    | 2.9  | 5.74E-01 |   |   |
| LSP1       | 6.1    | 1.0 | 13.4   | 2.2 | 5.29E-05 | 12.3   | 2.0  | 3.13E-02 |   |   |
| PROS1      | 17.2   | 1.0 | 37.8   | 2.2 | 3.04E-02 | 35.6   | 2.1  | 7.28E-01 |   |   |
| DPYSL3     | 7.2    | 1.0 | 15.8   | 2.2 | 3.54E-02 | 11.8   | 1.6  | 1.97E-01 |   |   |
| FSCN1      | 2.4    | 1.0 | 5.3    | 2.2 | 1.16E-03 | 3.1    | 1.3  | 1.50E-02 |   | v |
| SDSL       | 1.4    | 1.0 | 3.1    | 2.2 | 3.41E-05 | 2.8    | 2.0  | 4.05E-02 |   |   |
| MXRA8      | 6.5    | 1.0 | 14.2   | 2.2 | 5.50E-03 | 12.7   | 2.0  | 7.11E-02 |   |   |
| FOXS1      | 1.1    | 1.0 | 2.3    | 2.2 | 7.91E-03 | 0.9    | -1.1 | 5.61E-02 |   |   |
| KCNS3      | 1.0    | 1.0 | 2.2    | 2.1 | 3.60E-02 | 1.6    | 1.6  | 2.81E-01 |   |   |
| BOC        | 1.3    | 1.0 | 2.7    | 2.1 | 3.37E-03 | 4.4    | 3.4  | 3.97E-01 |   |   |
| ODF3B      | 2.7    | 1.0 | 5.7    | 2.1 | 4.53E-02 | 3.9    | 1.5  | 7.00E-02 |   |   |
| PLCE1      | 2.9    | 1.0 | 6.1    | 2.1 | 2.48E-06 | 6.5    | 2.3  | 9.74E-01 |   |   |
| HTRA1      | 15.3   | 1.0 | 32.6   | 2.1 | 2.54E-05 | 26.7   | 1.7  | 3.94E-02 |   |   |
| PPP1R10    | 3.0    | 1.0 | 6.3    | 2.1 | 1.34E-06 | 8.6    | 2.9  | 4.25E-01 |   |   |
| BMP6       | 1.1    | 1.0 | 2.3    | 2.1 | 1.71E-02 | 1.0    | -1.0 | 2.40E-02 | v | v |
| MOXD1      | 1.1    | 1.0 | 2.4    | 2.1 | 3.07E-04 | 2.4    | 2.1  | 2.50E-01 |   |   |
| HAAO       | 1.0    | 1.0 | 2.1    | 2.1 | 7.19E-03 | 2.2    | 2.2  | 3.91E-01 |   |   |
| HAPLN3     | 0.7    | 1.0 | 1.5    | 2.1 | 4.71E-03 | 2.3    | 3.3  | 4.34E-01 |   |   |
| XAF1       | 1.8    | 1.0 | 3.8    | 2.1 | 1.04E-02 | 3.7    | 2.1  | 2.82E-01 |   |   |
| IFIT2      | 1.6    | 1.0 | 3.3    | 2.1 | 1.35E-02 | 1.7    | 1.1  | 1.70E-02 |   | v |
| GEM        | 4.3    | 1.0 | 9.0    | 2.1 | 3.84E-02 | 12.4   | 2.9  | 2.56E-01 |   |   |
| LRRC17     | 1.0    | 1.0 | 2.2    | 2.1 | 1.35E-02 | 2.3    | 2.2  | 3.73E-01 |   |   |
| IFI44      | 3.9    | 1.0 | 8.2    | 2.1 | 3.36E-02 | 6.9    | 1.8  | 2.22E-01 |   |   |
| RGS11      | 3.8    | 1.0 | 7.8    | 2.1 | 4.83E-05 | 6.3    | 1.7  | 1.35E-02 |   |   |
| CERCAM     | 2.5    | 1.0 | 5.1    | 2.1 | 6.24E-03 | 5.8    | 2.4  | 3.25E-01 |   |   |
| CD44       | 2.7    | 1.0 | 5.6    | 2.1 | 1.89E-03 | 5.6    | 2.1  | 9.38E-02 |   |   |
| ADAMTSL2   | 1.4    | 1.0 | 3.0    | 2.1 | 2.93E-02 | 2.5    | 1.8  | 3.73E-01 |   |   |
| FBLN2      | 16.5   | 1.0 | 34.1   | 2.1 | 3.79E-02 | 30.2   | 1.8  | 1.50E-01 |   |   |
| VCAN       | 5.2    | 1.0 | 10.8   | 2.1 | 3.66E-02 | 8.2    | 1.6  | 2.00E-01 |   |   |
| CRYM       | 26.2   | 1.0 | 53.6   | 2.0 | 1.03E-03 | 33.5   | 1.3  | 3.75E-02 |   | v |
| PER2       | 1.0    | 1.0 | 2.0    | 2.0 | 1.48E-04 | 4.0    | 4.1  | 2.02E-01 |   |   |
| MGP        | 75.6   | 1.0 | 154.2  | 2.0 | 2.44E-02 | 206.3  | 2.7  | 4.96E-01 |   |   |
| DIO2       | 1.8    | 1.0 | 3.7    | 2.0 | 3.34E-02 | 4.4    | 2.4  | 3.48E-01 |   |   |
| COL12A1    | 4.3    | 1.0 | 8.7    | 2.0 | 9.04E-03 | 9.7    | 2.3  | 9.94E-01 |   |   |
| ETV5       | 1.0    | 1.0 | 2.1    | 2.0 | 5.78E-03 | 1.7    | 1.7  | 1.08E-01 |   |   |
| SERPINI1   | 2.1    | 1.0 | 4.2    | 2.0 | 8.90E-04 | 3.0    | 1.5  | 2.49E-02 |   | v |
| ANKRD1     | 1116.5 | 1.0 | 2256.4 | 2.0 | 7.59E-03 | 2753.7 | 2.5  | 3.78E-01 |   |   |
| DDX60      | 1.1    | 1.0 | 2.1    | 2.0 | 1.09E-03 | 1.9    | 1.8  | 1.32E-01 |   |   |
| MRC2       | 5.3    | 1.0 | 10.5   | 2.0 | 2.08E-02 | 11.1   | 2.1  | 4.65E-01 |   |   |
| PTGFRN     | 11.0   | 1.0 | 21.8   | 2.0 | 8.50E-05 | 19.7   | 1.8  | 2.45E-01 |   |   |
| ENO2       | 3.6    | 1.0 | 7.1    | 2.0 | 5.82E-04 | 5.8    | 1.6  | 5.66E-03 |   |   |
| C3orf52    | 0.9    | 1.0 | 1.8    | 2.0 | 7.34E-03 | 2.3    | 2.5  | 1.57E-01 |   |   |
| SACS       | 1.1    | 1.0 | 2.2    | 2.0 | 2.31E-03 | 2.1    | 2.0  | 5.10E-01 |   |   |
| MYH10      | 7.0    | 1.0 | 14.0   | 2.0 | 4.84E-02 | 9.9    | 1.4  | 1.91E-01 |   |   |
| NPR3       | 5.4    | 1.0 | 10.7   | 2.0 | 1.07E-04 | 6.5    | 1.2  | 6.45E-02 |   |   |
| PPP2R1B    | 1.6    | 1.0 | 3.1    | 2.0 | 2.26E-02 | 2.5    | 1.6  | 9.90E-02 |   |   |
| HSPB6      | 379.4  | 1.0 | 750.4  | 2.0 | 6.54E-03 | 567.7  | 1.5  | 3.97E-01 |   |   |
| PRSS23     | 2.2    | 1.0 | 4.4    | 2.0 | 4.29E-02 | 6.1    | 2.7  | 2.41E-01 |   |   |
| EXT1       | 3.5    | 1.0 | 6.8    | 2.0 | 6.56E-03 | 5.7    | 1.7  | 1.37E-01 |   |   |
| DUSP5      | 2.7    | 1.0 | 5.2    | 2.0 | 1.63E-03 | 13.1   | 4.9  | 5.49E-01 |   |   |
| POMZP3     | 2.1    | 1.0 | 4.1    | 2.0 | 2.79E-02 | 3.8    | 1.8  | 3.80E-01 |   |   |
| CGNL1      | 3.7    | 1.0 | 7.3    | 2.0 | 4.13E-02 | 4.6    | 1.2  | 3.68E-02 |   | v |
| FIBIN      | 3.9    | 1.0 | 7.7    | 2.0 | 7.60E-03 | 13.3   | 3.4  | 5.65E-01 |   |   |
| PTGIS      | 2.2    | 1.0 | 4.3    | 2.0 | 5.83E-03 | 2.4    | 1.1  | 2.08E-02 |   | v |
| FGF1       | 9.0    | 1.0 | 17.5   | 2.0 | 7.30E-06 | 11.8   | 1.3  | 5.27E-03 |   | v |
| KCNC4      | 1.0    | 1.0 | 2.0    | 2.0 | 2.14E-06 | 2.6    | 2.5  | 2.70E-01 |   |   |
| IGF1       | 1.6    | 1.0 | 3.1    | 1.9 | 4.81E-02 | 6.0    | 3.8  | 6.51E-01 |   |   |
| THBS3      | 2.2    | 1.0 | 4.3    | 1.9 | 3.35E-02 | 4.0    | 1.8  | 2.02E-01 |   |   |
| ACE        | 1.6    | 1.0 | 3.1    | 1.9 | 3.34E-02 | 2.7    | 1.7  | 5.89E-02 |   |   |
| BST1       | 1.0    | 1.0 | 1.9    | 1.9 | 2.72E-02 | 1.7    | 1.7  | 1.63E-01 |   |   |
| EGR2       | 0.5    | 1.0 | 0.9    | 1.9 | 4.41E-02 | 9.4    | 20.2 | 8.90E-01 |   |   |
| NBLA00301  | 2.0    | 1.0 | 3.9    | 1.9 | 3.46E-03 | 2.2    | 1.1  | 3.32E-02 |   | v |
| TLL2       | 1.0    | 1.0 | 1.9    | 1.9 | 7.02E-03 | 1.4    | 1.5  | 2.06E-01 |   |   |
| SOD3       | 18.0   | 1.0 | 34.7   | 1.9 | 3.32E-03 | 35.6   | 2.0  | 1.95E-01 |   |   |
| SELP       | 1.3    | 1.0 | 2.5    | 1.9 | 7.15E-03 | 1.4    | 1.1  | 1.13E-02 | v | v |
| DNM1       | 1.6    | 1.0 | 3.1    | 1.9 | 1.22E-02 | 2.8    | 1.7  | 7.00E-02 |   |   |
| CHAC1      | 0.3    | 1.0 | 0.6    | 1.9 | 1.72E-02 | 2.6    | 7.9  | 8.41E-02 |   |   |

|           |      |     |       |     |          |       |      |          |   |   |
|-----------|------|-----|-------|-----|----------|-------|------|----------|---|---|
| MLLT11    | 8.7  | 1.0 | 16.8  | 1.9 | 1.38E-02 | 25.2  | 2.9  | 1.57E-01 |   |   |
| FAM102B   | 1.0  | 1.0 | 1.9   | 1.9 | 1.91E-02 | 2.0   | 2.0  | 2.15E-01 |   |   |
| SAMD9L    | 1.2  | 1.0 | 2.2   | 1.9 | 1.68E-02 | 1.8   | 1.6  | 1.41E-01 |   |   |
| PDE3B     | 1.7  | 1.0 | 3.3   | 1.9 | 3.50E-02 | 3.2   | 1.9  | 2.25E-01 |   |   |
| KDELR3    | 2.4  | 1.0 | 4.5   | 1.9 | 1.05E-02 | 4.0   | 1.7  | 2.04E-01 |   |   |
| DUSP6     | 5.0  | 1.0 | 9.4   | 1.9 | 1.76E-04 | 14.3  | 2.9  | 4.96E-01 |   |   |
| ASNS      | 3.2  | 1.0 | 6.1   | 1.9 | 1.81E-04 | 4.4   | 1.4  | 2.37E-03 |   | √ |
| FSTL3     | 16.2 | 1.0 | 30.3  | 1.9 | 2.20E-03 | 40.9  | 2.5  | 2.89E-01 |   |   |
| RASA4     | 2.4  | 1.0 | 4.5   | 1.9 | 9.04E-04 | 4.7   | 2.0  | 1.29E-01 |   |   |
| QPCT      | 0.7  | 1.0 | 1.2   | 1.9 | 3.14E-03 | 2.3   | 3.5  | 2.17E-01 |   |   |
| AGPAT9    | 10.2 | 1.0 | 19.1  | 1.9 | 6.65E-05 | 20.8  | 2.0  | 3.63E-01 |   |   |
| EDNRA     | 4.5  | 1.0 | 8.5   | 1.9 | 1.89E-03 | 9.9   | 2.2  | 6.11E-01 |   |   |
| MAFK      | 16.1 | 1.0 | 30.0  | 1.9 | 1.03E-04 | 31.5  | 2.0  | 5.70E-01 |   |   |
| GPX8      | 0.9  | 1.0 | 1.7   | 1.9 | 2.48E-02 | 1.3   | 1.4  | 1.09E-01 |   |   |
| SSPN      | 6.7  | 1.0 | 12.4  | 1.8 | 1.24E-05 | 9.5   | 1.4  | 5.59E-03 |   |   |
| LMF1      | 1.7  | 1.0 | 3.1   | 1.8 | 2.99E-03 | 3.5   | 2.1  | 7.24E-01 |   |   |
| COL4A5    | 1.2  | 1.0 | 2.3   | 1.8 | 1.49E-02 | 2.1   | 1.7  | 3.24E-01 |   |   |
| DDAH1     | 2.5  | 1.0 | 4.6   | 1.8 | 1.30E-02 | 7.1   | 2.8  | 2.43E-01 |   |   |
| EVC       | 1.1  | 1.0 | 2.1   | 1.8 | 3.75E-02 | 2.3   | 2.0  | 3.84E-01 |   |   |
| VWASA     | 1.1  | 1.0 | 2.1   | 1.8 | 7.09E-03 | 1.5   | 1.3  | 1.77E-02 |   | √ |
| GBP1      | 2.1  | 1.0 | 3.8   | 1.8 | 3.58E-02 | 3.9   | 1.9  | 1.41E-01 |   |   |
| GAB3      | 4.5  | 1.0 | 8.2   | 1.8 | 1.35E-04 | 3.8   | -1.2 | 1.04E-04 |   |   |
| SMAD6     | 3.3  | 1.0 | 6.1   | 1.8 | 7.43E-04 | 4.3   | 1.3  | 2.49E-02 |   | √ |
| LOXL2     | 1.4  | 1.0 | 2.6   | 1.8 | 3.89E-03 | 2.4   | 1.6  | 1.44E-01 |   |   |
| GPR153    | 1.0  | 1.0 | 1.8   | 1.8 | 1.71E-02 | 2.7   | 2.7  | 7.40E-01 |   |   |
| STK38L    | 9.3  | 1.0 | 16.9  | 1.8 | 4.51E-03 | 15.7  | 1.7  | 5.18E-02 |   |   |
| F10       | 1.9  | 1.0 | 3.5   | 1.8 | 4.36E-02 | 3.1   | 1.6  | 2.43E-01 |   |   |
| GLT25D2   | 1.8  | 1.0 | 3.3   | 1.8 | 2.97E-03 | 3.2   | 1.8  | 3.87E-01 |   |   |
| HNMT      | 1.8  | 1.0 | 3.4   | 1.8 | 3.68E-02 | 2.8   | 1.5  | 9.55E-02 |   |   |
| DHRS11    | 3.0  | 1.0 | 5.4   | 1.8 | 3.49E-05 | 4.3   | 1.5  | 2.80E-02 |   |   |
| MEOX2     | 3.1  | 1.0 | 5.6   | 1.8 | 9.16E-03 | 3.9   | 1.2  | 4.43E-02 |   | √ |
| AZIN1     | 9.0  | 1.0 | 16.4  | 1.8 | 7.94E-04 | 20.6  | 2.3  | 5.23E-01 |   |   |
| C7orf58   | 4.0  | 1.0 | 7.3   | 1.8 | 4.71E-03 | 6.9   | 1.7  | 3.34E-01 |   |   |
| FZD7      | 4.1  | 1.0 | 7.4   | 1.8 | 1.87E-05 | 5.0   | 1.2  | 2.05E-03 |   | √ |
| LTC4S     | 1.3  | 1.0 | 2.3   | 1.8 | 9.36E-03 | 1.4   | 1.1  | 1.78E-02 | √ | √ |
| RAB23     | 2.7  | 1.0 | 5.0   | 1.8 | 1.36E-02 | 4.6   | 1.7  | 3.34E-01 |   |   |
| OLFML1    | 1.7  | 1.0 | 3.1   | 1.8 | 4.92E-02 | 1.9   | 1.1  | 4.25E-02 |   | √ |
| PPDPF     | 76.1 | 1.0 | 137.2 | 1.8 | 1.53E-05 | 113.1 | 1.5  | 1.75E-02 |   |   |
| ADAM19    | 2.2  | 1.0 | 4.0   | 1.8 | 2.60E-02 | 2.9   | 1.3  | 1.19E-01 |   |   |
| HSPA2     | 5.4  | 1.0 | 9.7   | 1.8 | 2.79E-02 | 15.3  | 2.9  | 4.33E-01 |   |   |
| IFIH1     | 1.3  | 1.0 | 2.4   | 1.8 | 2.32E-02 | 2.0   | 1.5  | 8.93E-02 |   |   |
| MN1       | 1.1  | 1.0 | 1.9   | 1.8 | 3.59E-03 | 1.3   | 1.2  | 2.33E-02 |   | √ |
| PIK3IP1   | 5.6  | 1.0 | 10.1  | 1.8 | 2.63E-02 | 11.5  | 2.0  | 4.11E-01 |   |   |
| NAP1L5    | 1.5  | 1.0 | 2.7   | 1.8 | 7.54E-05 | 3.2   | 2.1  | 3.44E-01 |   |   |
| GSDMB     | 1.1  | 1.0 | 1.9   | 1.8 | 1.33E-03 | 2.4   | 2.2  | 3.17E-01 |   |   |
| COL5A1    | 3.9  | 1.0 | 7.0   | 1.8 | 3.42E-02 | 6.6   | 1.7  | 2.85E-01 |   |   |
| ENC1      | 1.2  | 1.0 | 2.1   | 1.8 | 1.46E-02 | 2.6   | 2.1  | 8.64E-01 |   |   |
| C20orf26  | 5.4  | 1.0 | 9.7   | 1.8 | 5.25E-04 | 5.1   | -1.1 | 8.40E-04 | √ | √ |
| SCARF2    | 1.0  | 1.0 | 1.7   | 1.8 | 3.71E-02 | 2.3   | 2.3  | 9.40E-01 |   |   |
| CXCL16    | 1.3  | 1.0 | 2.3   | 1.8 | 4.28E-02 | 3.0   | 2.4  | 4.41E-01 |   |   |
| TMEM71    | 7.0  | 1.0 | 12.4  | 1.8 | 3.08E-03 | 12.0  | 1.7  | 7.16E-01 |   |   |
| KCTD17    | 1.3  | 1.0 | 2.2   | 1.8 | 8.85E-04 | 1.9   | 1.6  | 1.70E-01 |   |   |
| FZD1      | 4.7  | 1.0 | 8.4   | 1.8 | 1.43E-02 | 6.7   | 1.4  | 5.22E-02 |   |   |
| SOCS2     | 3.2  | 1.0 | 5.7   | 1.8 | 1.84E-04 | 8.5   | 2.6  | 7.58E-01 |   |   |
| MYEF2     | 1.4  | 1.0 | 2.4   | 1.8 | 4.06E-04 | 2.3   | 1.7  | 4.17E-01 |   |   |
| SHB       | 1.9  | 1.0 | 3.3   | 1.8 | 1.31E-05 | 3.0   | 1.6  | 2.62E-01 |   |   |
| ATP13A3   | 8.5  | 1.0 | 15.1  | 1.8 | 9.75E-03 | 10.0  | 1.2  | 7.90E-02 |   |   |
| NOTCH2    | 3.4  | 1.0 | 6.0   | 1.8 | 7.89E-03 | 5.3   | 1.6  | 1.24E-01 |   |   |
| TNXB      | 16.4 | 1.0 | 29.0  | 1.8 | 4.86E-02 | 21.1  | 1.3  | 6.56E-02 |   |   |
| PNMA1     | 1.6  | 1.0 | 2.8   | 1.8 | 1.79E-03 | 2.4   | 1.5  | 5.40E-02 |   |   |
| GLT8D2    | 3.2  | 1.0 | 5.6   | 1.8 | 2.11E-02 | 5.1   | 1.6  | 1.31E-01 |   |   |
| ZNF323    | 1.4  | 1.0 | 2.5   | 1.8 | 7.35E-04 | 2.0   | 1.4  | 4.13E-02 |   |   |
| JAK2      | 6.0  | 1.0 | 10.6  | 1.8 | 6.55E-03 | 15.4  | 2.5  | 1.12E-01 |   |   |
| CTNND2    | 2.0  | 1.0 | 3.5   | 1.8 | 2.17E-02 | 3.6   | 1.8  | 7.69E-01 |   |   |
| RAB31     | 3.5  | 1.0 | 6.1   | 1.8 | 3.18E-02 | 9.3   | 2.7  | 5.56E-01 |   |   |
| PCSK5     | 1.1  | 1.0 | 2.0   | 1.8 | 1.12E-02 | 1.9   | 1.7  | 1.33E-01 |   |   |
| C4orf29   | 3.1  | 1.0 | 5.4   | 1.7 | 2.91E-03 | 5.3   | 1.7  | 4.29E-01 |   |   |
| ETV1      | 5.4  | 1.0 | 9.4   | 1.7 | 2.45E-04 | 6.6   | 1.2  | 6.86E-02 |   |   |
| ITIH5     | 3.4  | 1.0 | 6.0   | 1.7 | 6.61E-03 | 6.1   | 1.8  | 2.16E-01 |   |   |
| NAP1L2    | 2.5  | 1.0 | 4.3   | 1.7 | 1.69E-03 | 2.5   | -1.0 | 1.31E-03 | √ | √ |
| TIMP2     | 30.1 | 1.0 | 52.1  | 1.7 | 2.66E-02 | 57.9  | 1.9  | 2.42E-01 |   |   |
| PLAGL1    | 4.1  | 1.0 | 7.1   | 1.7 | 5.68E-04 | 7.1   | 1.7  | 1.59E-01 |   |   |
| C2orf40   | 1.1  | 1.0 | 1.9   | 1.7 | 2.69E-02 | 2.5   | 2.3  | 8.11E-01 |   |   |
| COL21A1   | 5.8  | 1.0 | 10.1  | 1.7 | 8.52E-04 | 11.0  | 1.9  | 9.96E-01 |   |   |
| RCN3      | 3.3  | 1.0 | 5.7   | 1.7 | 3.43E-02 | 6.3   | 1.9  | 3.64E-01 |   |   |
| ZNF423    | 1.5  | 1.0 | 2.6   | 1.7 | 3.63E-03 | 1.7   | 1.1  | 8.58E-03 |   | √ |
| LOC728392 | 1.5  | 1.0 | 2.5   | 1.7 | 2.79E-02 | 2.5   | 1.7  | 1.84E-01 |   |   |
| ZNF880    | 2.0  | 1.0 | 3.5   | 1.7 | 4.51E-02 | 3.5   | 1.7  | 6.25E-01 |   |   |
| ZMAT1     | 3.4  | 1.0 | 5.8   | 1.7 | 2.15E-05 | 5.1   | 1.5  | 2.58E-02 |   |   |
| SLC9A1    | 3.5  | 1.0 | 6.1   | 1.7 | 9.75E-05 | 6.1   | 1.7  | 3.97E-01 |   |   |
| PRRT2     | 1.3  | 1.0 | 2.2   | 1.7 | 1.85E-02 | 2.0   | 1.6  | 9.66E-02 |   |   |
| AP3M2     | 3.1  | 1.0 | 5.2   | 1.7 | 7.58E-06 | 3.8   | 1.3  | 1.55E-03 |   | √ |
| CLEC11A   | 1.3  | 1.0 | 2.2   | 1.7 | 1.91E-02 | 2.6   | 2.1  | 3.77E-01 |   |   |
| DUSP15    | 0.9  | 1.0 | 1.6   | 1.7 | 9.30E-03 | 1.2   | 1.3  | 6.72E-02 |   |   |
| DHX58     | 1.2  | 1.0 | 2.1   | 1.7 | 9.86E-03 | 1.8   | 1.5  | 7.71E-02 |   |   |
| OTUD1     | 5.8  | 1.0 | 10.0  | 1.7 | 2.17E-02 | 50.3  | 8.6  | 8.59E-01 |   |   |
| PLEKHB1   | 2.6  | 1.0 | 4.4   | 1.7 | 1.09E-02 | 3.4   | 1.3  | 1.09E-01 |   |   |
| INPP5F    | 1.4  | 1.0 | 2.4   | 1.7 | 4.29E-03 | 3.0   | 2.1  | 7.99E-01 |   |   |

|           |       |     |       |     |          |       |      |          |   |   |
|-----------|-------|-----|-------|-----|----------|-------|------|----------|---|---|
| SDC2      | 9.3   | 1.0 | 15.9  | 1.7 | 1.07E-02 | 14.7  | 1.6  | 2.58E-01 |   |   |
| C3orf58   | 1.2   | 1.0 | 2.1   | 1.7 | 2.44E-03 | 2.7   | 2.2  | 4.38E-01 |   |   |
| ENAH      | 3.7   | 1.0 | 6.2   | 1.7 | 7.68E-04 | 9.7   | 2.7  | 1.48E-01 |   |   |
| JAM3      | 7.9   | 1.0 | 13.4  | 1.7 | 2.50E-05 | 12.0  | 1.5  | 1.23E-02 |   |   |
| SCRN1     | 4.8   | 1.0 | 8.1   | 1.7 | 2.78E-02 | 9.1   | 1.9  | 8.23E-01 |   |   |
| VEGFC     | 1.8   | 1.0 | 3.0   | 1.7 | 1.11E-02 | 1.9   | 1.1  | 8.11E-03 | √ | √ |
| CXCR7     | 10.1  | 1.0 | 17.2  | 1.7 | 1.44E-03 | 8.5   | -1.2 | 1.72E-03 |   |   |
| ODC1      | 15.0  | 1.0 | 25.4  | 1.7 | 1.74E-05 | 26.9  | 1.8  | 8.56E-01 |   |   |
| UTED-TXND | 1.2   | 1.0 | 2.0   | 1.7 | 7.20E-03 | 1.8   | 1.5  | 4.54E-01 |   |   |
| DYNC2L1   | 2.8   | 1.0 | 4.8   | 1.7 | 5.50E-05 | 4.0   | 1.4  | 1.63E-03 |   |   |
| RHOBTB1   | 4.1   | 1.0 | 6.9   | 1.7 | 1.73E-04 | 6.8   | 1.7  | 3.84E-01 |   |   |
| KIF13A    | 15.9  | 1.0 | 26.8  | 1.7 | 3.76E-04 | 21.8  | 1.4  | 2.29E-02 |   |   |
| HMGN2     | 22.5  | 1.0 | 37.8  | 1.7 | 3.82E-06 | 36.2  | 1.6  | 3.74E-02 |   |   |
| BTN3A1    | 2.2   | 1.0 | 3.6   | 1.7 | 5.85E-03 | 3.6   | 1.7  | 1.04E-01 |   |   |
| PRRX1     | 7.6   | 1.0 | 12.8  | 1.7 | 1.15E-03 | 19.5  | 2.6  | 7.15E-02 |   |   |
| GARNL3    | 3.0   | 1.0 | 5.1   | 1.7 | 9.15E-04 | 3.5   | 1.2  | 6.19E-05 |   | √ |
| TSC22D2   | 3.7   | 1.0 | 6.2   | 1.7 | 2.19E-04 | 8.6   | 2.3  | 5.21E-01 |   |   |
| RAI14     | 1.1   | 1.0 | 1.9   | 1.7 | 2.71E-02 | 2.1   | 1.8  | 1.92E-01 |   |   |
| DOK5      | 2.0   | 1.0 | 3.3   | 1.7 | 3.58E-02 | 2.6   | 1.3  | 6.26E-02 |   |   |
| ST3GAL6   | 9.8   | 1.0 | 16.4  | 1.7 | 8.00E-05 | 13.4  | 1.4  | 2.30E-01 |   |   |
| FILIP1L   | 17.5  | 1.0 | 29.2  | 1.7 | 2.04E-02 | 38.2  | 2.2  | 5.35E-01 |   |   |
| EEF1A1    | 327.1 | 1.0 | 546.7 | 1.7 | 2.42E-02 | 528.0 | 1.6  | 9.31E-02 |   |   |
| PODN      | 8.6   | 1.0 | 14.3  | 1.7 | 2.66E-02 | 23.7  | 2.8  | 5.35E-01 |   |   |
| APBB3     | 3.0   | 1.0 | 5.0   | 1.7 | 7.04E-05 | 4.1   | 1.4  | 1.73E-02 |   |   |
| GADD45A   | 16.4  | 1.0 | 27.2  | 1.7 | 3.35E-03 | 33.3  | 2.0  | 6.15E-01 |   |   |
| MARCH3    | 2.6   | 1.0 | 4.3   | 1.7 | 2.31E-04 | 3.2   | 1.2  | 2.22E-02 |   | √ |
| IER2      | 6.7   | 1.0 | 11.1  | 1.7 | 9.26E-03 | 29.3  | 4.4  | 7.24E-01 |   |   |
| RELL1     | 1.6   | 1.0 | 2.6   | 1.7 | 5.19E-04 | 2.6   | 1.7  | 2.04E-01 |   |   |
| WTIP      | 3.9   | 1.0 | 6.4   | 1.7 | 1.32E-04 | 6.9   | 1.8  | 2.65E-01 |   |   |
| SLC27A3   | 1.9   | 1.0 | 3.1   | 1.7 | 3.45E-03 | 2.5   | 1.3  | 2.77E-02 |   |   |
| SORBS2    | 130.3 | 1.0 | 215.8 | 1.7 | 1.71E-03 | 155.4 | 1.2  | 1.18E-01 |   |   |
| TSPAN9    | 29.1  | 1.0 | 48.3  | 1.7 | 4.99E-05 | 35.1  | 1.2  | 3.57E-03 |   | √ |
| SGCE      | 6.7   | 1.0 | 11.1  | 1.7 | 5.74E-03 | 11.3  | 1.7  | 1.53E-01 |   |   |
| PAK1      | 1.5   | 1.0 | 2.5   | 1.7 | 4.54E-02 | 2.9   | 1.9  | 5.75E-01 |   |   |
| MYOCD     | 4.1   | 1.0 | 6.8   | 1.7 | 1.51E-03 | 4.4   | 1.1  | 4.67E-03 | √ | √ |
| KIAA0556  | 1.9   | 1.0 | 3.1   | 1.7 | 9.17E-06 | 3.5   | 1.8  | 9.42E-01 |   |   |
| INPP4B    | 2.5   | 1.0 | 4.0   | 1.7 | 2.78E-03 | 3.5   | 1.4  | 2.66E-01 |   |   |
| DIXDC1    | 4.0   | 1.0 | 6.6   | 1.6 | 1.24E-03 | 8.0   | 2.0  | 4.98E-01 |   |   |
| MARVELD1  | 2.2   | 1.0 | 3.5   | 1.6 | 1.71E-02 | 3.1   | 1.4  | 8.34E-02 |   |   |
| C22orf25  | 8.0   | 1.0 | 13.2  | 1.6 | 4.50E-04 | 8.5   | 1.1  | 5.16E-03 | √ | √ |
| CARD16    | 2.0   | 1.0 | 3.3   | 1.6 | 4.41E-03 | 2.4   | 1.2  | 3.69E-02 |   | √ |
| POLR1E    | 3.3   | 1.0 | 5.4   | 1.6 | 6.62E-04 | 5.4   | 1.7  | 1.01E-01 |   |   |
| USP11     | 9.9   | 1.0 | 16.2  | 1.6 | 7.29E-06 | 16.4  | 1.7  | 1.28E-02 |   |   |
| TMEM231   | 1.9   | 1.0 | 3.1   | 1.6 | 6.73E-04 | 2.0   | 1.1  | 3.51E-03 | √ | √ |
| C14orf179 | 4.9   | 1.0 | 8.1   | 1.6 | 3.54E-05 | 8.7   | 1.8  | 8.87E-01 |   |   |
| C9orf9    | 1.9   | 1.0 | 3.0   | 1.6 | 1.68E-02 | 1.7   | -1.1 | 5.92E-03 | √ | √ |
| ATP8B2    | 2.6   | 1.0 | 4.3   | 1.6 | 7.10E-03 | 5.3   | 2.0  | 4.45E-01 |   |   |
| SNED1     | 1.5   | 1.0 | 2.5   | 1.6 | 4.13E-02 | 3.7   | 2.5  | 2.68E-01 |   |   |
| LTBP1     | 21.2  | 1.0 | 34.7  | 1.6 | 9.79E-03 | 37.3  | 1.8  | 9.89E-01 |   |   |
| SPINT2    | 1.7   | 1.0 | 2.8   | 1.6 | 1.83E-02 | 2.9   | 1.7  | 7.97E-01 |   |   |
| GPRASP1   | 3.3   | 1.0 | 5.4   | 1.6 | 4.19E-03 | 5.1   | 1.6  | 2.42E-02 |   |   |
| ARRDC3    | 2.8   | 1.0 | 4.6   | 1.6 | 5.95E-03 | 5.4   | 1.9  | 2.95E-01 |   |   |
| SLC16A7   | 1.7   | 1.0 | 2.7   | 1.6 | 1.91E-03 | 2.0   | 1.2  | 1.91E-02 |   | √ |
| FMNL3     | 1.8   | 1.0 | 2.9   | 1.6 | 4.30E-03 | 3.7   | 2.1  | 8.22E-01 |   |   |
| MAP3K3    | 9.5   | 1.0 | 15.4  | 1.6 | 3.02E-03 | 19.5  | 2.1  | 6.93E-01 |   |   |
| DOK4      | 1.8   | 1.0 | 2.9   | 1.6 | 1.95E-03 | 2.4   | 1.4  | 3.73E-02 |   |   |
| GSN       | 284.5 | 1.0 | 463.2 | 1.6 | 1.63E-02 | 484.6 | 1.7  | 3.60E-01 |   |   |
| PIIP5K1   | 2.0   | 1.0 | 3.3   | 1.6 | 1.19E-05 | 2.9   | 1.4  | 2.07E-02 |   |   |
| DUSP8     | 3.3   | 1.0 | 5.3   | 1.6 | 6.34E-03 | 6.2   | 1.9  | 3.11E-01 |   |   |
| B3GNT9    | 2.9   | 1.0 | 4.6   | 1.6 | 1.94E-03 | 4.1   | 1.4  | 9.60E-02 |   |   |
| DDAH2     | 12.7  | 1.0 | 20.6  | 1.6 | 2.07E-03 | 20.5  | 1.6  | 1.40E-01 |   |   |
| FAM70B    | 1.3   | 1.0 | 2.1   | 1.6 | 4.68E-02 | 2.8   | 2.2  | 3.84E-01 |   |   |
| MAPK4     | 6.5   | 1.0 | 10.6  | 1.6 | 3.22E-02 | 9.2   | 1.4  | 8.00E-01 |   |   |
| NAV1      | 8.2   | 1.0 | 13.2  | 1.6 | 4.67E-03 | 8.3   | 1.0  | 2.94E-03 | √ | √ |
| TP53INP2  | 27.0  | 1.0 | 43.6  | 1.6 | 1.20E-03 | 46.4  | 1.7  | 8.41E-01 |   |   |
| TMEM136   | 2.0   | 1.0 | 3.2   | 1.6 | 5.73E-05 | 3.1   | 1.6  | 3.36E-02 |   |   |
| IFI27L1   | 2.4   | 1.0 | 3.8   | 1.6 | 4.22E-02 | 3.3   | 1.4  | 3.92E-01 |   |   |
| PCDHGA12  | 1.2   | 1.0 | 2.0   | 1.6 | 7.01E-03 | 2.3   | 1.9  | 5.99E-01 |   |   |
| CKS2      | 1.4   | 1.0 | 2.2   | 1.6 | 4.10E-02 | 3.5   | 2.6  | 8.79E-01 |   |   |
| RRAS2     | 8.1   | 1.0 | 13.1  | 1.6 | 2.03E-02 | 24.9  | 3.1  | 1.33E-01 |   |   |
| MEX3D     | 1.1   | 1.0 | 1.8   | 1.6 | 5.42E-03 | 2.2   | 2.0  | 3.79E-01 |   |   |
| TSTD1     | 2.9   | 1.0 | 4.6   | 1.6 | 1.24E-02 | 4.7   | 1.6  | 2.66E-01 |   |   |
| C1orf54   | 3.3   | 1.0 | 5.2   | 1.6 | 2.68E-02 | 5.8   | 1.8  | 1.86E-01 |   |   |
| DLL4      | 2.6   | 1.0 | 4.2   | 1.6 | 3.31E-02 | 4.8   | 1.8  | 3.68E-01 |   |   |
| DNAJA4    | 31.3  | 1.0 | 50.2  | 1.6 | 4.84E-03 | 58.3  | 1.9  | 5.75E-01 |   |   |
| GLRB      | 2.3   | 1.0 | 3.7   | 1.6 | 4.56E-04 | 3.3   | 1.4  | 2.27E-01 |   |   |
| STYXL1    | 2.2   | 1.0 | 3.5   | 1.6 | 5.09E-04 | 3.4   | 1.5  | 2.63E-02 |   |   |
| ANXA4     | 5.1   | 1.0 | 8.2   | 1.6 | 1.02E-02 | 6.8   | 1.3  | 5.49E-02 |   |   |
| XPC       | 4.0   | 1.0 | 6.4   | 1.6 | 5.72E-04 | 6.1   | 1.5  | 3.30E-02 |   |   |
| UBA7      | 3.6   | 1.0 | 5.7   | 1.6 | 1.02E-02 | 5.2   | 1.5  | 5.59E-02 |   |   |
| ICOSLG    | 1.4   | 1.0 | 2.3   | 1.6 | 4.13E-03 | 2.1   | 1.5  | 1.98E-01 |   |   |
| CAT       | 23.3  | 1.0 | 37.2  | 1.6 | 3.84E-03 | 34.0  | 1.5  | 1.65E-01 |   |   |
| DYNLL1    | 36.2  | 1.0 | 57.9  | 1.6 | 1.43E-03 | 62.1  | 1.7  | 3.31E-01 |   |   |
| DCBLD2    | 6.0   | 1.0 | 9.5   | 1.6 | 7.84E-05 | 13.9  | 2.3  | 2.48E-01 |   |   |
| FSTL1     | 53.6  | 1.0 | 85.5  | 1.6 | 1.27E-02 | 106.0 | 2.0  | 9.98E-01 |   |   |
| TGFB1     | 13.8  | 1.0 | 22.0  | 1.6 | 1.12E-03 | 14.0  | 1.0  | 1.52E-02 | √ | √ |
| ARHGAP1   | 17.8  | 1.0 | 28.4  | 1.6 | 1.34E-04 | 22.9  | 1.3  | 1.01E-02 |   |   |
| CCDC109B  | 1.6   | 1.0 | 2.6   | 1.6 | 1.84E-02 | 2.6   | 1.6  | 1.23E-01 |   |   |

|           |       |     |       |     |          |       |      |          |   |   |
|-----------|-------|-----|-------|-----|----------|-------|------|----------|---|---|
| DLGAP4    | 9.8   | 1.0 | 15.6  | 1.6 | 1.61E-04 | 13.8  | 1.4  | 3.34E-02 |   |   |
| ST8SIA5   | 1.3   | 1.0 | 2.0   | 1.6 | 3.84E-02 | 1.9   | 1.5  | 9.75E-01 |   |   |
| UBE2L6    | 6.5   | 1.0 | 10.4  | 1.6 | 1.02E-02 | 9.8   | 1.5  | 9.05E-02 |   |   |
| CD52      | 1.8   | 1.0 | 2.8   | 1.6 | 2.31E-02 | 6.0   | 3.4  | 2.50E-01 |   |   |
| C6orf27   | 2.6   | 1.0 | 4.1   | 1.6 | 3.71E-03 | 3.7   | 1.5  | 5.65E-01 |   |   |
| PLXDC1    | 2.8   | 1.0 | 4.4   | 1.6 | 5.98E-03 | 4.2   | 1.5  | 4.34E-02 |   |   |
| TCTN1     | 2.7   | 1.0 | 4.4   | 1.6 | 1.87E-02 | 3.7   | 1.3  | 2.60E-02 |   |   |
| GAB2      | 4.4   | 1.0 | 7.0   | 1.6 | 3.79E-03 | 6.1   | 1.4  | 6.24E-02 |   |   |
| SIK2      | 4.7   | 1.0 | 7.4   | 1.6 | 6.52E-04 | 6.5   | 1.4  | 1.49E-02 |   |   |
| CNRIP1    | 2.9   | 1.0 | 4.5   | 1.6 | 4.02E-02 | 4.5   | 1.6  | 1.28E-01 |   |   |
| AR        | 2.8   | 1.0 | 4.4   | 1.6 | 1.49E-03 | 2.7   | -1.0 | 1.25E-02 | ∇ | ∇ |
| C1orf63   | 10.9  | 1.0 | 17.1  | 1.6 | 5.73E-04 | 24.4  | 2.2  | 6.85E-01 |   |   |
| GABPB2    | 2.1   | 1.0 | 3.3   | 1.6 | 1.23E-03 | 3.4   | 1.6  | 3.38E-01 |   |   |
| ITPRIP    | 9.5   | 1.0 | 14.9  | 1.6 | 3.15E-02 | 23.5  | 2.5  | 5.59E-01 |   |   |
| ORMDL3    | 12.4  | 1.0 | 19.5  | 1.6 | 2.60E-04 | 20.5  | 1.7  | 8.34E-01 |   |   |
| ALPK3     | 20.8  | 1.0 | 32.7  | 1.6 | 1.20E-03 | 29.4  | 1.4  | 3.03E-01 |   |   |
| LTBP3     | 16.7  | 1.0 | 26.1  | 1.6 | 3.80E-03 | 28.2  | 1.7  | 2.97E-01 |   |   |
| SPRY1     | 5.8   | 1.0 | 9.0   | 1.6 | 2.50E-03 | 24.7  | 4.3  | 5.61E-01 |   |   |
| SLC30A1   | 2.7   | 1.0 | 4.2   | 1.6 | 9.22E-04 | 3.3   | 1.2  | 1.09E-02 |   |   |
| CREB5     | 1.6   | 1.0 | 2.5   | 1.6 | 2.17E-02 | 3.2   | 2.0  | 4.74E-01 |   |   |
| FOXC1     | 1.1   | 1.0 | 1.7   | 1.6 | 2.89E-02 | 2.1   | 2.0  | 2.90E-01 |   |   |
| SRR       | 1.6   | 1.0 | 2.5   | 1.6 | 1.08E-03 | 2.0   | 1.3  | 2.00E-02 |   |   |
| LHPP      | 2.1   | 1.0 | 3.2   | 1.6 | 8.35E-03 | 2.7   | 1.3  | 1.49E-02 |   |   |
| MYPN      | 26.8  | 1.0 | 41.7  | 1.6 | 1.01E-02 | 48.3  | 1.8  | 4.27E-01 |   |   |
| PDLIM3    | 42.5  | 1.0 | 66.1  | 1.6 | 7.01E-03 | 65.2  | 1.5  | 8.16E-01 |   |   |
| DFNA5     | 1.6   | 1.0 | 2.4   | 1.6 | 2.98E-02 | 2.8   | 1.8  | 9.56E-01 |   |   |
| RECK      | 1.8   | 1.0 | 2.8   | 1.6 | 3.47E-02 | 2.9   | 1.6  | 2.72E-01 |   |   |
| PGM5P2    | 1.6   | 1.0 | 2.5   | 1.6 | 2.31E-02 | 2.2   | 1.4  | 7.58E-02 |   |   |
| PLAU      | 3.1   | 1.0 | 4.8   | 1.6 | 4.22E-02 | 2.7   | -1.1 | 2.79E-03 |   |   |
| RABL2B    | 1.7   | 1.0 | 2.6   | 1.6 | 1.08E-03 | 2.8   | 1.7  | 2.04E-01 |   |   |
| PMEP1     | 4.3   | 1.0 | 6.6   | 1.6 | 5.22E-03 | 6.2   | 1.5  | 2.88E-01 |   |   |
| EHD3      | 6.1   | 1.0 | 9.5   | 1.6 | 1.62E-02 | 6.9   | 1.1  | 7.12E-02 |   |   |
| VSNL1     | 3.5   | 1.0 | 5.5   | 1.5 | 1.30E-02 | 4.5   | 1.3  | 6.20E-02 |   |   |
| PEX12     | 2.1   | 1.0 | 3.3   | 1.5 | 4.07E-06 | 2.8   | 1.3  | 1.38E-01 |   |   |
| SLC40A1   | 10.8  | 1.0 | 16.7  | 1.5 | 1.01E-02 | 12.0  | 1.1  | 1.37E-02 |   | ∇ |
| ARHGAP24  | 3.5   | 1.0 | 5.4   | 1.5 | 4.02E-03 | 6.1   | 1.7  | 4.28E-01 |   |   |
| PARP10    | 2.5   | 1.0 | 3.8   | 1.5 | 2.21E-02 | 3.6   | 1.5  | 1.24E-01 |   |   |
| SLC25A5   | 37.4  | 1.0 | 57.8  | 1.5 | 2.63E-04 | 54.3  | 1.5  | 3.89E-02 |   |   |
| DNAJB4    | 17.7  | 1.0 | 27.2  | 1.5 | 1.56E-04 | 29.2  | 1.7  | 2.26E-01 |   |   |
| MDFIC     | 3.4   | 1.0 | 5.3   | 1.5 | 3.88E-05 | 5.4   | 1.6  | 1.24E-01 |   |   |
| UBE2H     | 23.4  | 1.0 | 36.1  | 1.5 | 3.82E-05 | 34.5  | 1.5  | 1.93E-01 |   |   |
| PHLDA3    | 5.8   | 1.0 | 8.9   | 1.5 | 1.65E-02 | 8.9   | 1.5  | 4.22E-01 |   |   |
| KLHL13    | 2.5   | 1.0 | 3.9   | 1.5 | 1.66E-02 | 2.3   | -1.1 | 7.11E-03 | ∇ | ∇ |
| PHLDB2    | 14.9  | 1.0 | 22.9  | 1.5 | 4.74E-04 | 19.3  | 1.3  | 2.22E-01 |   |   |
| DLG4      | 2.2   | 1.0 | 3.4   | 1.5 | 2.96E-04 | 3.8   | 1.7  | 1.52E-01 |   |   |
| ZNF462    | 2.2   | 1.0 | 3.3   | 1.5 | 1.55E-04 | 2.5   | 1.2  | 7.56E-04 |   |   |
| IFIT5     | 2.2   | 1.0 | 3.4   | 1.5 | 1.62E-03 | 3.0   | 1.4  | 1.01E-01 |   |   |
| C14orf128 | 2.4   | 1.0 | 3.7   | 1.5 | 8.53E-05 | 2.5   | 1.0  | 1.23E-02 | ∇ | ∇ |
| MICAL2    | 8.8   | 1.0 | 13.5  | 1.5 | 5.50E-04 | 11.3  | 1.3  | 7.10E-02 |   |   |
| NYNRIN    | 1.9   | 1.0 | 2.8   | 1.5 | 5.22E-03 | 2.5   | 1.3  | 5.17E-02 |   |   |
| FAM43A    | 2.9   | 1.0 | 4.5   | 1.5 | 4.48E-03 | 3.8   | 1.3  | 5.17E-02 |   |   |
| RTN3      | 12.4  | 1.0 | 19.1  | 1.5 | 1.05E-02 | 22.2  | 1.8  | 9.51E-01 |   |   |
| ALDH18A1  | 2.6   | 1.0 | 4.0   | 1.5 | 2.21E-03 | 3.2   | 1.2  | 4.65E-02 |   |   |
| CASP1     | 2.3   | 1.0 | 3.5   | 1.5 | 7.58E-03 | 2.9   | 1.3  | 7.04E-02 |   |   |
| PIGF      | 2.1   | 1.0 | 3.2   | 1.5 | 5.76E-03 | 3.1   | 1.5  | 8.45E-02 |   |   |
| HIVEP2    | 3.1   | 1.0 | 4.8   | 1.5 | 4.69E-04 | 4.8   | 1.5  | 6.92E-03 |   |   |
| PKD2      | 4.7   | 1.0 | 7.1   | 1.5 | 1.85E-02 | 8.2   | 1.8  | 3.89E-01 |   |   |
| DUSP16    | 2.4   | 1.0 | 3.7   | 1.5 | 7.74E-04 | 4.5   | 1.9  | 3.66E-01 |   |   |
| PARP14    | 2.2   | 1.0 | 3.4   | 1.5 | 4.12E-02 | 2.7   | 1.2  | 9.68E-02 |   |   |
| INO80B    | 2.0   | 1.0 | 3.1   | 1.5 | 1.63E-02 | 2.8   | 1.4  | 1.39E-01 |   |   |
| PRICKLE2  | 1.1   | 1.0 | 1.7   | 1.5 | 1.56E-02 | 2.6   | 2.4  | 6.63E-01 |   |   |
| FAM102A   | 3.0   | 1.0 | 4.6   | 1.5 | 4.85E-04 | 3.3   | 1.1  | 1.17E-02 |   | ∇ |
| FARP1     | 3.0   | 1.0 | 4.5   | 1.5 | 3.83E-03 | 6.5   | 2.2  | 3.72E-01 |   |   |
| VCAM1     | 1.3   | 1.0 | 2.0   | 1.5 | 1.66E-02 | 1.7   | 1.3  | 5.84E-02 |   |   |
| C19orf66  | 3.2   | 1.0 | 5.0   | 1.5 | 4.71E-03 | 5.4   | 1.7  | 1.27E-01 |   |   |
| LXN       | 1.4   | 1.0 | 2.2   | 1.5 | 9.27E-03 | 2.0   | 1.4  | 7.13E-02 |   |   |
| XPR1      | 9.2   | 1.0 | 14.0  | 1.5 | 6.64E-03 | 18.1  | 2.0  | 3.44E-01 |   |   |
| PACS1     | 11.5  | 1.0 | 17.5  | 1.5 | 1.06E-03 | 15.7  | 1.4  | 7.55E-02 |   |   |
| TRUB1     | 3.7   | 1.0 | 5.6   | 1.5 | 7.90E-05 | 5.5   | 1.5  | 3.64E-01 |   |   |
| YPEL2     | 6.7   | 1.0 | 10.2  | 1.5 | 1.25E-03 | 11.1  | 1.7  | 8.57E-01 |   |   |
| EGLN3     | 24.3  | 1.0 | 37.0  | 1.5 | 2.70E-02 | 53.5  | 2.2  | 2.00E-01 |   |   |
| LIMA1     | 6.9   | 1.0 | 10.5  | 1.5 | 1.39E-02 | 10.2  | 1.5  | 9.30E-02 |   |   |
| GRINL1A   | 6.4   | 1.0 | 9.7   | 1.5 | 4.27E-05 | 10.3  | 1.6  | 4.63E-01 |   |   |
| HSD17B12  | 13.5  | 1.0 | 20.5  | 1.5 | 1.80E-02 | 15.8  | 1.2  | 1.46E-02 |   |   |
| STMN3     | 2.0   | 1.0 | 3.0   | 1.5 | 3.53E-02 | 3.3   | 1.6  | 1.80E-01 |   |   |
| C20orf3   | 9.6   | 1.0 | 14.6  | 1.5 | 4.03E-02 | 13.1  | 1.4  | 8.81E-02 |   |   |
| NLRC5     | 1.3   | 1.0 | 2.0   | 1.5 | 4.11E-02 | 2.1   | 1.6  | 1.61E-01 |   |   |
| CHN1      | 2.8   | 1.0 | 4.3   | 1.5 | 1.51E-04 | 4.4   | 1.5  | 3.90E-01 |   |   |
| MAP4      | 77.1  | 1.0 | 116.9 | 1.5 | 6.52E-03 | 130.4 | 1.7  | 4.87E-01 |   |   |
| AFAP1     | 1.4   | 1.0 | 2.1   | 1.5 | 1.47E-02 | 1.9   | 1.4  | 8.50E-02 |   |   |
| CD74      | 109.7 | 1.0 | 165.9 | 1.5 | 1.08E-02 | 221.2 | 2.0  | 2.12E-01 |   |   |
| ANO1      | 4.0   | 1.0 | 6.1   | 1.5 | 3.91E-02 | 4.8   | 1.2  | 1.04E-01 |   |   |
| TMCO3     | 5.7   | 1.0 | 8.6   | 1.5 | 6.77E-05 | 10.2  | 1.8  | 9.04E-01 |   |   |
| TUBA1A    | 49.4  | 1.0 | 74.5  | 1.5 | 4.43E-03 | 68.7  | 1.4  | 1.82E-01 |   |   |
| UBE2Q2    | 5.4   | 1.0 | 8.2   | 1.5 | 1.01E-04 | 8.8   | 1.6  | 5.33E-01 |   |   |
| SLC20A1   | 2.8   | 1.0 | 4.3   | 1.5 | 5.08E-03 | 8.1   | 2.9  | 9.41E-01 |   |   |
| THAP6     | 1.9   | 1.0 | 2.8   | 1.5 | 8.96E-05 | 2.3   | 1.2  | 4.78E-03 |   |   |
| NHSL1     | 4.6   | 1.0 | 6.9   | 1.5 | 1.59E-03 | 4.3   | -1.1 | 1.08E-04 | ∇ | ∇ |

|            |       |     |       |     |          |       |      |          |   |   |
|------------|-------|-----|-------|-----|----------|-------|------|----------|---|---|
| SPRY4      | 2.2   | 1.0 | 3.3   | 1.5 | 1.47E-02 | 5.9   | 2.7  | 6.02E-01 |   |   |
| SERPINH1   | 13.7  | 1.0 | 20.6  | 1.5 | 2.07E-02 | 23.3  | 1.7  | 5.07E-01 |   |   |
| PTPN21     | 6.5   | 1.0 | 9.7   | 1.5 | 1.85E-04 | 9.7   | 1.5  | 2.98E-01 |   |   |
| CCND1      | 17.3  | 1.0 | 25.9  | 1.5 | 3.20E-04 | 19.8  | 1.1  | 1.72E-02 |   |   |
| PLBD1      | 10.3  | 1.0 | 15.5  | 1.5 | 2.61E-04 | 12.0  | 1.2  | 2.22E-03 |   |   |
| ZNF251     | 3.5   | 1.0 | 5.3   | 1.5 | 6.90E-03 | 6.5   | 1.9  | 4.36E-01 |   |   |
| SLC22A17   | 2.7   | 1.0 | 4.0   | 1.5 | 2.38E-02 | 4.1   | 1.6  | 1.75E-01 |   |   |
| SEC31A     | 20.3  | 1.0 | 30.4  | 1.5 | 4.10E-08 | 30.2  | 1.5  | 1.01E-01 |   |   |
| CLIP3      | 1.1   | 1.0 | 1.6   | 1.5 | 3.29E-02 | 2.4   | 2.2  | 4.40E-01 |   |   |
| LETMD1     | 4.8   | 1.0 | 7.2   | 1.5 | 5.50E-03 | 6.4   | 1.3  | 2.94E-02 |   |   |
| CYP27A1    | 3.3   | 1.0 | 5.0   | 1.5 | 1.90E-02 | 5.5   | 1.7  | 2.01E-01 |   |   |
| OMMD3-BM   | 2.5   | 1.0 | 3.7   | 1.5 | 2.91E-02 | 3.5   | 1.4  | 5.81E-02 |   |   |
| TWSG1      | 3.1   | 1.0 | 4.7   | 1.5 | 3.16E-02 | 5.3   | 1.7  | 4.36E-01 |   |   |
| LAMA2      | 27.5  | 1.0 | 41.1  | 1.5 | 1.29E-03 | 45.2  | 1.6  | 7.21E-01 |   |   |
| HIPK2      | 13.4  | 1.0 | 20.0  | 1.5 | 1.62E-03 | 21.8  | 1.6  | 6.16E-01 |   |   |
| EXOC6B     | 15.1  | 1.0 | 22.5  | 1.5 | 4.41E-03 | 20.6  | 1.4  | 7.34E-01 |   |   |
| CASC4      | 6.1   | 1.0 | 9.0   | 1.5 | 1.39E-02 | 9.3   | 1.5  | 1.51E-01 |   |   |
| DNAJA1     | 26.3  | 1.0 | 39.1  | 1.5 | 5.98E-04 | 52.7  | 2.0  | 9.39E-01 |   |   |
| RARG       | 2.7   | 1.0 | 4.0   | 1.5 | 4.38E-02 | 3.0   | 1.1  | 4.83E-02 |   |   |
| ZNF528     | 2.0   | 1.0 | 2.9   | 1.5 | 1.15E-03 | 2.8   | 1.4  | 1.49E-01 |   |   |
| TBC1D2B    | 3.1   | 1.0 | 4.5   | 1.5 | 4.57E-02 | 4.1   | 1.4  | 8.94E-02 |   |   |
| NRIP2      | 1.3   | 1.0 | 2.0   | 1.5 | 1.56E-02 | 1.2   | -1.1 | 6.48E-03 | √ | √ |
| EML2       | 5.5   | 1.0 | 8.1   | 1.5 | 1.54E-06 | 7.3   | 1.3  | 8.06E-04 |   |   |
| ARPC4-TTL3 | 1.3   | 1.0 | 1.9   | 1.5 | 3.19E-02 | 2.1   | 1.6  | 1.51E-01 |   |   |
| NBPF1      | 1.4   | 1.0 | 2.1   | 1.5 | 2.53E-02 | 1.7   | 1.2  | 3.78E-02 |   |   |
| HSPA4L     | 2.4   | 1.0 | 3.5   | 1.5 | 5.58E-04 | 2.5   | 1.0  | 1.88E-03 | √ | √ |
| GPRASP2    | 3.0   | 1.0 | 4.5   | 1.5 | 1.28E-03 | 3.2   | 1.1  | 1.47E-03 | √ | √ |
| COP22      | 9.2   | 1.0 | 13.5  | 1.5 | 4.02E-03 | 12.4  | 1.4  | 1.43E-01 |   |   |
| DYRK1B     | 5.0   | 1.0 | 7.4   | 1.5 | 1.79E-03 | 7.3   | 1.5  | 3.09E-01 |   |   |
| TTC8       | 2.4   | 1.0 | 3.5   | 1.5 | 1.08E-02 | 3.0   | 1.2  | 8.92E-02 |   |   |
| GOLM1      | 2.0   | 1.0 | 3.0   | 1.5 | 5.50E-03 | 4.0   | 2.0  | 3.93E-01 |   |   |
| MICA       | 4.5   | 1.0 | 6.6   | 1.5 | 4.05E-02 | 7.6   | 1.7  | 6.95E-01 |   |   |
| GALNT10    | 2.6   | 1.0 | 3.9   | 1.5 | 6.56E-03 | 3.6   | 1.4  | 7.53E-02 |   |   |
| PEX16      | 2.2   | 1.0 | 3.2   | 1.5 | 4.11E-03 | 3.4   | 1.6  | 1.55E-01 |   |   |
| TRIB1      | 3.5   | 1.0 | 5.1   | 1.5 | 2.61E-02 | 10.9  | 3.1  | 1.38E-01 |   |   |
| SFXN3      | 3.9   | 1.0 | 5.7   | 1.5 | 4.68E-02 | 5.4   | 1.4  | 1.74E-01 |   |   |
| MOBK2C     | 2.6   | 1.0 | 3.8   | 1.5 | 5.06E-03 | 5.3   | 2.1  | 9.80E-01 |   |   |
| STAT2      | 4.7   | 1.0 | 7.0   | 1.5 | 1.90E-02 | 7.9   | 1.7  | 1.85E-01 |   |   |
| OAT        | 9.9   | 1.0 | 14.5  | 1.5 | 2.78E-03 | 14.7  | 1.5  | 1.89E-01 |   |   |
| PCDHGA3    | 1.7   | 1.0 | 2.5   | 1.5 | 3.55E-05 | 2.6   | 1.5  | 8.82E-01 |   |   |
| KIAA0922   | 3.7   | 1.0 | 5.4   | 1.5 | 4.00E-03 | 5.7   | 1.6  | 5.82E-01 |   |   |
| RNF213     | 3.3   | 1.0 | 4.9   | 1.5 | 2.25E-02 | 4.4   | 1.3  | 6.45E-02 |   |   |
| DNTTIP1    | 5.6   | 1.0 | 8.3   | 1.5 | 3.26E-04 | 8.3   | 1.5  | 1.87E-01 |   |   |
| TMEM140    | 8.8   | 1.0 | 12.9  | 1.5 | 1.24E-02 | 14.2  | 1.6  | 4.56E-01 |   |   |
| ANGPTL2    | 9.3   | 1.0 | 13.6  | 1.5 | 9.99E-03 | 8.6   | -1.1 | 2.90E-04 | √ | √ |
| WEE1       | 7.8   | 1.0 | 11.5  | 1.5 | 1.01E-02 | 13.2  | 1.7  | 2.58E-01 |   |   |
| HSPB1      | 494.9 | 1.0 | 724.0 | 1.5 | 8.12E-03 | 895.1 | 1.8  | 3.72E-01 |   |   |
| ZNF415     | 4.2   | 1.0 | 6.2   | 1.5 | 1.10E-03 | 4.5   | 1.1  | 1.28E-02 | √ | √ |
| CXorf56    | 2.4   | 1.0 | 3.6   | 1.5 | 1.30E-03 | 3.8   | 1.5  | 2.73E-01 |   |   |
| CPE        | 16.8  | 1.0 | 24.5  | 1.5 | 4.74E-02 | 23.7  | 1.4  | 1.05E-01 |   |   |
| ATP8B1     | 1.5   | 1.0 | 2.2   | 1.5 | 1.94E-02 | 1.9   | 1.3  | 1.88E-02 |   |   |
| LEPREL2    | 2.7   | 1.0 | 3.9   | 1.5 | 1.48E-02 | 3.7   | 1.4  | 7.21E-02 |   |   |
| AMOTL1     | 5.0   | 1.0 | 7.3   | 1.5 | 1.92E-03 | 9.9   | 2.0  | 1.52E-01 |   |   |
| MCAM       | 19.9  | 1.0 | 29.0  | 1.5 | 1.33E-02 | 24.5  | 1.2  | 4.27E-02 |   |   |
| FAM13C     | 2.4   | 1.0 | 3.4   | 1.5 | 3.39E-03 | 4.0   | 1.7  | 2.54E-01 |   |   |
| CCDC117    | 2.2   | 1.0 | 3.1   | 1.5 | 8.16E-03 | 4.2   | 1.9  | 7.95E-01 |   |   |
| TYRP1      | 11.0  | 1.0 | 15.9  | 1.5 | 7.08E-03 | 15.2  | 1.4  | 9.66E-01 |   |   |
| IRF9       | 6.6   | 1.0 | 9.7   | 1.5 | 1.00E-02 | 10.2  | 1.5  | 1.59E-01 |   |   |
| DHRS1      | 2.2   | 1.0 | 3.2   | 1.5 | 9.40E-03 | 2.8   | 1.3  | 1.56E-02 |   |   |
| MLL        | 2.5   | 1.0 | 3.7   | 1.5 | 6.05E-04 | 3.6   | 1.4  | 7.00E-02 |   |   |
| DNAJB1     | 11.3  | 1.0 | 16.4  | 1.5 | 4.55E-03 | 31.8  | 2.8  | 5.02E-01 |   |   |
| GHR        | 2.9   | 1.0 | 4.2   | 1.5 | 1.28E-02 | 3.8   | 1.3  | 6.24E-02 |   |   |
| IDUA       | 1.8   | 1.0 | 2.6   | 1.4 | 4.03E-02 | 2.5   | 1.4  | 1.65E-01 |   |   |
| KIFAP3     | 13.1  | 1.0 | 19.0  | 1.4 | 2.92E-02 | 14.8  | 1.1  | 4.30E-02 |   |   |
| KCNJ4      | 8.5   | 1.0 | 12.3  | 1.4 | 5.25E-03 | 9.5   | 1.1  | 1.58E-01 |   |   |
| MAP3K12    | 1.6   | 1.0 | 2.3   | 1.4 | 4.71E-02 | 2.4   | 1.5  | 1.38E-01 |   |   |
| ALDH4A1    | 8.1   | 1.0 | 11.7  | 1.4 | 6.56E-04 | 10.7  | 1.3  | 2.53E-01 |   |   |
| TRPC1      | 3.0   | 1.0 | 4.3   | 1.4 | 4.45E-03 | 4.3   | 1.5  | 3.67E-01 |   |   |
| TMEM98     | 2.5   | 1.0 | 3.7   | 1.4 | 2.33E-02 | 3.5   | 1.4  | 7.39E-02 |   |   |
| IL10RB     | 2.6   | 1.0 | 3.7   | 1.4 | 1.69E-02 | 3.7   | 1.4  | 1.62E-01 |   |   |
| ARAP1      | 7.4   | 1.0 | 10.8  | 1.4 | 9.13E-04 | 9.0   | 1.2  | 3.08E-03 |   |   |
| TBCK       | 1.8   | 1.0 | 2.6   | 1.4 | 5.12E-03 | 2.8   | 1.6  | 1.73E-01 |   |   |
| RFX5       | 3.4   | 1.0 | 4.9   | 1.4 | 1.38E-04 | 4.6   | 1.4  | 1.42E-02 |   |   |
| YWHAQ      | 45.7  | 1.0 | 66.2  | 1.4 | 1.30E-04 | 65.4  | 1.4  | 4.39E-03 |   |   |
| KCNAB1     | 1.4   | 1.0 | 2.1   | 1.4 | 4.34E-02 | 2.3   | 1.6  | 3.89E-01 |   |   |
| ZNF827     | 2.2   | 1.0 | 3.1   | 1.4 | 4.32E-03 | 3.2   | 1.5  | 6.58E-01 |   |   |
| DLG5       | 2.3   | 1.0 | 3.4   | 1.4 | 7.98E-03 | 4.7   | 2.0  | 6.48E-01 |   |   |
| ZNF83      | 7.1   | 1.0 | 10.2  | 1.4 | 2.18E-03 | 10.5  | 1.5  | 5.03E-02 |   |   |
| P4HTM      | 5.9   | 1.0 | 8.5   | 1.4 | 9.08E-04 | 7.7   | 1.3  | 4.12E-02 |   |   |
| EPHX2      | 8.3   | 1.0 | 11.9  | 1.4 | 1.19E-02 | 9.6   | 1.2  | 6.49E-02 |   |   |
| PER3       | 2.9   | 1.0 | 4.2   | 1.4 | 2.17E-02 | 4.1   | 1.4  | 6.96E-01 |   |   |
| NMI        | 1.4   | 1.0 | 2.0   | 1.4 | 2.87E-02 | 2.0   | 1.4  | 1.29E-01 |   |   |
| LGALS9     | 4.2   | 1.0 | 6.0   | 1.4 | 3.85E-02 | 5.0   | 1.2  | 3.69E-02 |   |   |
| ARMCX2     | 5.1   | 1.0 | 7.4   | 1.4 | 1.11E-03 | 6.0   | 1.2  | 8.35E-03 |   |   |
| KIF3B      | 2.7   | 1.0 | 3.9   | 1.4 | 3.95E-04 | 3.8   | 1.4  | 5.15E-02 |   |   |
| EXOC2      | 3.4   | 1.0 | 4.9   | 1.4 | 3.55E-04 | 4.5   | 1.3  | 6.01E-02 |   |   |
| KCTD13     | 1.9   | 1.0 | 2.7   | 1.4 | 4.69E-05 | 3.0   | 1.6  | 9.40E-02 |   |   |
| CDC14B     | 4.3   | 1.0 | 6.2   | 1.4 | 3.90E-05 | 5.2   | 1.2  | 7.07E-03 |   |   |

|           |       |     |       |     |          |       |      |          |   |   |
|-----------|-------|-----|-------|-----|----------|-------|------|----------|---|---|
| SLC16A2   | 2.4   | 1.0 | 3.5   | 1.4 | 4.59E-02 | 3.0   | 1.2  | 1.29E-01 |   |   |
| CHST14    | 2.7   | 1.0 | 3.8   | 1.4 | 7.46E-04 | 3.2   | 1.2  | 1.48E-03 |   |   |
| GNL1      | 1.6   | 1.0 | 2.4   | 1.4 | 7.96E-03 | 2.5   | 1.5  | 1.25E-01 |   |   |
| TBC1D16   | 2.5   | 1.0 | 3.6   | 1.4 | 3.06E-02 | 3.3   | 1.3  | 6.76E-02 |   |   |
| CTF1      | 3.0   | 1.0 | 4.3   | 1.4 | 2.81E-03 | 3.8   | 1.3  | 4.62E-02 |   |   |
| IFI27L2   | 10.8  | 1.0 | 15.5  | 1.4 | 3.11E-02 | 13.5  | 1.3  | 2.74E-02 |   |   |
| ZBTB47    | 17.2  | 1.0 | 24.6  | 1.4 | 1.22E-02 | 25.4  | 1.5  | 8.59E-01 |   |   |
| FANCL     | 1.9   | 1.0 | 2.7   | 1.4 | 6.42E-03 | 2.5   | 1.4  | 5.79E-02 |   |   |
| ADAMTSL5  | 4.8   | 1.0 | 6.8   | 1.4 | 2.20E-02 | 7.9   | 1.7  | 3.24E-01 |   |   |
| SORT1     | 17.5  | 1.0 | 25.1  | 1.4 | 5.39E-03 | 31.9  | 1.8  | 3.65E-01 |   |   |
| AGRN      | 2.8   | 1.0 | 4.1   | 1.4 | 1.78E-02 | 3.9   | 1.4  | 9.68E-02 |   |   |
| TRIM41    | 5.4   | 1.0 | 7.7   | 1.4 | 1.45E-03 | 7.7   | 1.4  | 2.64E-01 |   |   |
| C16orf58  | 7.8   | 1.0 | 11.1  | 1.4 | 2.21E-04 | 10.3  | 1.3  | 1.90E-02 |   |   |
| RICTOR    | 2.7   | 1.0 | 3.9   | 1.4 | 1.10E-02 | 4.2   | 1.5  | 3.48E-01 |   |   |
| SEMA5B    | 1.4   | 1.0 | 2.0   | 1.4 | 1.77E-02 | 1.3   | -1.1 | 4.32E-02 | √ | √ |
| CCDC141   | 8.5   | 1.0 | 12.1  | 1.4 | 9.43E-03 | 8.8   | 1.0  | 2.62E-02 | √ | √ |
| DDR1      | 4.2   | 1.0 | 6.0   | 1.4 | 4.17E-02 | 9.4   | 2.2  | 1.06E-01 |   |   |
| LOC728855 | 1.1   | 1.0 | 1.6   | 1.4 | 2.11E-02 | 1.6   | 1.4  | 1.44E-01 |   |   |
| BCL7A     | 3.3   | 1.0 | 4.7   | 1.4 | 1.27E-03 | 4.3   | 1.3  | 8.36E-02 |   |   |
| NFE2L2    | 16.7  | 1.0 | 23.8  | 1.4 | 3.98E-04 | 30.7  | 1.8  | 5.13E-01 |   |   |
| HSP90AB1  | 177.8 | 1.0 | 253.6 | 1.4 | 9.56E-05 | 265.9 | 1.5  | 5.65E-02 |   |   |
| HDAC9     | 2.7   | 1.0 | 3.9   | 1.4 | 2.74E-02 | 4.3   | 1.6  | 8.87E-01 |   |   |
| CLSTN3    | 1.7   | 1.0 | 2.4   | 1.4 | 3.68E-02 | 3.1   | 1.9  | 1.92E-01 |   |   |
| TMEM60    | 2.5   | 1.0 | 3.6   | 1.4 | 8.81E-03 | 3.4   | 1.4  | 4.26E-02 |   |   |
| C7orf60   | 2.8   | 1.0 | 3.9   | 1.4 | 3.15E-04 | 3.6   | 1.3  | 4.37E-02 |   |   |
| CMIP      | 2.0   | 1.0 | 2.9   | 1.4 | 1.73E-02 | 2.9   | 1.4  | 9.39E-02 |   |   |
| GLS       | 4.9   | 1.0 | 7.0   | 1.4 | 3.54E-03 | 6.6   | 1.3  | 8.72E-02 |   |   |
| COPS7B    | 6.1   | 1.0 | 8.7   | 1.4 | 5.62E-05 | 7.6   | 1.2  | 1.89E-02 |   |   |
| ZNF853    | 2.2   | 1.0 | 3.1   | 1.4 | 3.65E-03 | 3.0   | 1.4  | 8.65E-01 |   |   |
| TGDS      | 1.5   | 1.0 | 2.1   | 1.4 | 1.00E-02 | 2.3   | 1.5  | 1.83E-01 |   |   |
| PTPLAD1   | 2.5   | 1.0 | 3.6   | 1.4 | 1.36E-02 | 3.0   | 1.2  | 2.63E-02 |   |   |
| PATZ1     | 2.7   | 1.0 | 3.8   | 1.4 | 4.68E-05 | 3.1   | 1.1  | 2.02E-03 |   |   |
| TERF2IP   | 17.6  | 1.0 | 25.0  | 1.4 | 2.39E-06 | 26.3  | 1.5  | 2.74E-02 |   |   |
| TANC1     | 13.0  | 1.0 | 18.5  | 1.4 | 4.39E-03 | 17.3  | 1.3  | 6.78E-01 |   |   |
| GLRX      | 24.6  | 1.0 | 35.0  | 1.4 | 1.28E-03 | 25.4  | 1.0  | 2.75E-03 | √ | √ |
| GMDS      | 1.6   | 1.0 | 2.2   | 1.4 | 5.72E-03 | 1.9   | 1.2  | 1.97E-02 |   |   |
| SPHK1     | 1.0   | 1.0 | 1.4   | 1.4 | 3.25E-02 | 2.4   | 2.5  | 9.53E-01 |   |   |
| NPR1      | 3.0   | 1.0 | 4.3   | 1.4 | 3.47E-02 | 4.3   | 1.4  | 1.04E-01 |   |   |
| FAT1      | 3.8   | 1.0 | 5.4   | 1.4 | 1.41E-03 | 4.9   | 1.3  | 2.79E-01 |   |   |
| CCDC85B   | 5.3   | 1.0 | 7.6   | 1.4 | 3.48E-04 | 7.0   | 1.3  | 3.97E-02 |   |   |
| ADCY6     | 24.3  | 1.0 | 34.4  | 1.4 | 4.00E-04 | 30.1  | 1.2  | 8.45E-02 |   |   |
| VPS41     | 4.2   | 1.0 | 6.0   | 1.4 | 7.67E-05 | 5.6   | 1.3  | 2.42E-02 |   |   |
| C14orf135 | 4.7   | 1.0 | 6.7   | 1.4 | 6.62E-04 | 6.1   | 1.3  | 1.77E-02 |   |   |
| SDC3      | 5.8   | 1.0 | 8.3   | 1.4 | 7.13E-03 | 8.3   | 1.4  | 3.14E-01 |   |   |
| DCAKD     | 3.7   | 1.0 | 5.2   | 1.4 | 9.37E-05 | 4.9   | 1.3  | 5.03E-02 |   |   |
| FLT4      | 1.8   | 1.0 | 2.6   | 1.4 | 7.24E-03 | 3.1   | 1.7  | 3.63E-01 |   |   |
| COL4A3BP  | 4.6   | 1.0 | 6.5   | 1.4 | 8.21E-05 | 6.3   | 1.4  | 9.78E-02 |   |   |
| ICK       | 1.7   | 1.0 | 2.4   | 1.4 | 2.97E-03 | 2.4   | 1.4  | 1.16E-01 |   |   |
| SYT11     | 3.8   | 1.0 | 5.3   | 1.4 | 1.87E-02 | 4.3   | 1.1  | 4.36E-02 |   |   |
| PRMT2     | 11.0  | 1.0 | 15.5  | 1.4 | 1.13E-03 | 16.4  | 1.5  | 2.76E-01 |   |   |
| HIST1H2AC | 6.2   | 1.0 | 8.8   | 1.4 | 2.87E-02 | 8.5   | 1.4  | 6.09E-01 |   |   |
| VGLL4     | 5.4   | 1.0 | 7.6   | 1.4 | 3.28E-03 | 7.2   | 1.3  | 4.83E-02 |   |   |
| ARAP3     | 4.1   | 1.0 | 5.7   | 1.4 | 6.81E-05 | 6.1   | 1.5  | 7.32E-02 |   |   |
| PIK3C2B   | 2.7   | 1.0 | 3.9   | 1.4 | 3.14E-03 | 3.0   | 1.1  | 3.72E-02 |   |   |
| SEPT6     | 3.5   | 1.0 | 4.9   | 1.4 | 2.10E-02 | 5.1   | 1.5  | 9.13E-02 |   |   |
| NR3C1     | 5.5   | 1.0 | 7.7   | 1.4 | 5.81E-03 | 6.5   | 1.2  | 2.33E-02 |   |   |
| GOLIM4    | 17.0  | 1.0 | 24.0  | 1.4 | 1.25E-03 | 21.1  | 1.2  | 2.79E-02 |   |   |
| C11orf95  | 1.6   | 1.0 | 2.3   | 1.4 | 1.08E-02 | 2.2   | 1.4  | 1.30E-01 |   |   |
| IVNS1ABP  | 17.6  | 1.0 | 24.8  | 1.4 | 1.33E-02 | 25.0  | 1.4  | 8.29E-02 |   |   |
| ZNF844    | 3.1   | 1.0 | 4.4   | 1.4 | 9.75E-04 | 3.8   | 1.2  | 1.21E-02 |   |   |
| NCDN      | 5.4   | 1.0 | 7.6   | 1.4 | 1.34E-03 | 7.5   | 1.4  | 3.34E-01 |   |   |
| DOPEY1    | 2.0   | 1.0 | 2.9   | 1.4 | 8.52E-04 | 3.0   | 1.5  | 5.39E-01 |   |   |
| MXRA7     | 120.3 | 1.0 | 169.7 | 1.4 | 1.67E-03 | 148.5 | 1.2  | 3.45E-02 |   |   |
| TCTN3     | 3.5   | 1.0 | 5.0   | 1.4 | 9.77E-03 | 4.1   | 1.2  | 4.73E-02 |   |   |
| CDC42EP5  | 1.9   | 1.0 | 2.7   | 1.4 | 2.18E-02 | 3.2   | 1.7  | 3.02E-01 |   |   |
| CNN3      | 22.7  | 1.0 | 32.0  | 1.4 | 4.25E-02 | 37.1  | 1.6  | 3.30E-01 |   |   |
| IFITM1    | 59.0  | 1.0 | 83.0  | 1.4 | 1.97E-02 | 79.3  | 1.3  | 7.95E-02 |   |   |
| ZNF404    | 2.3   | 1.0 | 3.3   | 1.4 | 9.66E-03 | 3.1   | 1.3  | 8.28E-02 |   |   |
| SLC26A11  | 1.1   | 1.0 | 1.6   | 1.4 | 3.53E-03 | 1.4   | 1.2  | 4.76E-02 |   |   |
| RNF217    | 1.5   | 1.0 | 2.1   | 1.4 | 1.92E-02 | 2.5   | 1.7  | 5.23E-01 |   |   |
| SMS       | 13.1  | 1.0 | 18.5  | 1.4 | 1.29E-04 | 16.4  | 1.2  | 1.17E-02 |   |   |
| VAMP1     | 2.3   | 1.0 | 3.2   | 1.4 | 2.10E-02 | 2.8   | 1.2  | 4.56E-02 |   |   |
| TTL3      | 2.1   | 1.0 | 3.0   | 1.4 | 4.72E-02 | 3.4   | 1.6  | 2.40E-01 |   |   |
| MED14     | 3.7   | 1.0 | 5.2   | 1.4 | 2.49E-04 | 4.7   | 1.3  | 8.40E-03 |   |   |
| PRKAR1A   | 123.8 | 1.0 | 173.9 | 1.4 | 5.08E-03 | 164.7 | 1.3  | 6.22E-02 |   |   |
| TRA2A     | 8.2   | 1.0 | 11.5  | 1.4 | 1.53E-03 | 15.1  | 1.8  | 6.33E-01 |   |   |
| PGCP      | 9.2   | 1.0 | 12.9  | 1.4 | 3.09E-02 | 13.3  | 1.5  | 2.35E-01 |   |   |
| LASS5     | 3.3   | 1.0 | 4.6   | 1.4 | 1.38E-03 | 5.4   | 1.6  | 1.83E-01 |   |   |
| TK2       | 2.3   | 1.0 | 3.2   | 1.4 | 6.22E-03 | 3.1   | 1.3  | 1.25E-01 |   |   |
| TRIM38    | 1.6   | 1.0 | 2.2   | 1.4 | 1.64E-02 | 2.3   | 1.5  | 1.27E-01 |   |   |
| ZSCAN18   | 11.0  | 1.0 | 15.4  | 1.4 | 3.99E-04 | 13.7  | 1.3  | 3.51E-03 |   |   |
| UBR1      | 3.9   | 1.0 | 5.4   | 1.4 | 9.59E-05 | 5.1   | 1.3  | 1.69E-01 |   |   |
| DUSP27    | 33.3  | 1.0 | 46.6  | 1.4 | 3.28E-02 | 67.9  | 2.0  | 2.10E-01 |   |   |
| UBB       | 363.8 | 1.0 | 509.4 | 1.4 | 3.69E-06 | 470.4 | 1.3  | 2.10E-02 |   |   |
| PLA2G6    | 2.5   | 1.0 | 3.5   | 1.4 | 1.26E-02 | 4.1   | 1.7  | 2.66E-01 |   |   |
| DNAL4     | 2.8   | 1.0 | 3.9   | 1.4 | 1.40E-03 | 3.5   | 1.3  | 2.74E-02 |   |   |
| C1orf198  | 10.1  | 1.0 | 14.1  | 1.4 | 1.16E-02 | 19.0  | 1.9  | 3.05E-01 |   |   |
| TLE4      | 1.7   | 1.0 | 2.4   | 1.4 | 7.07E-03 | 3.2   | 1.8  | 6.03E-01 |   |   |

|          |      |     |      |     |          |       |      |          |   |   |
|----------|------|-----|------|-----|----------|-------|------|----------|---|---|
| TSPYL1   | 9.9  | 1.0 | 13.8 | 1.4 | 1.03E-03 | 13.7  | 1.4  | 1.80E-01 |   |   |
| SIDT2    | 5.3  | 1.0 | 7.4  | 1.4 | 4.06E-03 | 8.0   | 1.5  | 1.38E-01 |   |   |
| DSE      | 2.5  | 1.0 | 3.5  | 1.4 | 4.24E-02 | 4.8   | 1.9  | 3.89E-01 |   |   |
| TCEA2    | 4.5  | 1.0 | 6.2  | 1.4 | 4.02E-03 | 6.3   | 1.4  | 1.47E-01 |   |   |
| NES      | 34.7 | 1.0 | 48.4 | 1.4 | 2.87E-02 | 65.7  | 1.9  | 2.97E-01 |   |   |
| RANBP10  | 2.5  | 1.0 | 3.5  | 1.4 | 7.06E-04 | 3.6   | 1.4  | 5.28E-02 |   |   |
| CEP164   | 1.4  | 1.0 | 2.0  | 1.4 | 6.30E-03 | 2.2   | 1.5  | 1.71E-01 |   |   |
| ATP6AP2  | 12.9 | 1.0 | 17.9 | 1.4 | 3.93E-03 | 17.2  | 1.3  | 6.44E-02 |   |   |
| HMGN1    | 17.2 | 1.0 | 24.0 | 1.4 | 2.31E-03 | 23.9  | 1.4  | 9.14E-02 |   |   |
| POGZ     | 7.9  | 1.0 | 11.0 | 1.4 | 7.63E-04 | 11.9  | 1.5  | 1.56E-01 |   |   |
| CRY2     | 15.5 | 1.0 | 21.6 | 1.4 | 4.39E-02 | 17.0  | 1.1  | 2.66E-02 |   |   |
| ANTXR2   | 5.3  | 1.0 | 7.4  | 1.4 | 3.47E-03 | 10.0  | 1.9  | 9.31E-01 |   |   |
| PPID     | 10.3 | 1.0 | 14.3 | 1.4 | 3.08E-04 | 13.5  | 1.3  | 3.10E-02 |   |   |
| EVL      | 10.6 | 1.0 | 14.7 | 1.4 | 2.07E-04 | 14.6  | 1.4  | 3.00E-02 |   |   |
| CLEC1A   | 1.2  | 1.0 | 1.7  | 1.4 | 5.82E-03 | 2.7   | 2.2  | 7.80E-01 |   |   |
| RCC2     | 2.5  | 1.0 | 3.5  | 1.4 | 1.29E-02 | 4.2   | 1.7  | 2.64E-01 |   |   |
| DZIP3    | 3.2  | 1.0 | 4.5  | 1.4 | 9.16E-03 | 3.7   | 1.2  | 2.73E-02 |   |   |
| ACYP1    | 2.8  | 1.0 | 3.8  | 1.4 | 3.53E-03 | 3.8   | 1.4  | 3.23E-02 |   |   |
| SIRPA    | 5.6  | 1.0 | 7.8  | 1.4 | 1.21E-02 | 6.8   | 1.2  | 2.33E-02 |   |   |
| ZFYVE27  | 3.5  | 1.0 | 4.8  | 1.4 | 5.32E-03 | 5.7   | 1.6  | 3.40E-01 |   |   |
| DCPS     | 3.4  | 1.0 | 4.8  | 1.4 | 4.76E-03 | 4.1   | 1.2  | 2.85E-02 |   |   |
| LRP5     | 8.5  | 1.0 | 11.7 | 1.4 | 4.02E-04 | 9.9   | 1.2  | 5.59E-03 |   |   |
| CSTF3    | 3.8  | 1.0 | 5.3  | 1.4 | 1.64E-03 | 5.1   | 1.3  | 2.98E-02 |   |   |
| ATP2B4   | 19.6 | 1.0 | 27.1 | 1.4 | 1.24E-03 | 26.9  | 1.4  | 9.05E-01 |   |   |
| TRIM45   | 3.0  | 1.0 | 4.1  | 1.4 | 3.29E-02 | 2.8   | -1.1 | 7.87E-03 | ∇ | ∇ |
| WDR31    | 3.7  | 1.0 | 5.1  | 1.4 | 3.48E-02 | 3.4   | -1.1 | 1.45E-03 | ∇ | ∇ |
| CDK8     | 2.5  | 1.0 | 3.5  | 1.4 | 1.02E-02 | 3.4   | 1.4  | 1.18E-01 |   |   |
| ANKRD13D | 2.8  | 1.0 | 3.9  | 1.4 | 4.23E-03 | 3.5   | 1.3  | 4.50E-02 |   |   |
| TRIM4    | 1.5  | 1.0 | 2.1  | 1.4 | 2.82E-02 | 2.9   | 2.0  | 6.09E-01 |   |   |
| C11orf24 | 7.1  | 1.0 | 9.8  | 1.4 | 1.15E-02 | 8.6   | 1.2  | 1.31E-01 |   |   |
| PTPRA    | 7.8  | 1.0 | 10.8 | 1.4 | 1.46E-02 | 10.1  | 1.3  | 6.68E-02 |   |   |
| MAGED2   | 22.0 | 1.0 | 30.3 | 1.4 | 9.06E-03 | 26.2  | 1.2  | 1.79E-02 |   |   |
| SLC35A5  | 3.0  | 1.0 | 4.1  | 1.4 | 6.90E-03 | 4.0   | 1.3  | 1.41E-01 |   |   |
| SNRK     | 5.5  | 1.0 | 7.6  | 1.4 | 4.05E-02 | 10.1  | 1.8  | 3.52E-01 |   |   |
| HLTF     | 4.8  | 1.0 | 6.6  | 1.4 | 2.50E-03 | 5.5   | 1.1  | 6.52E-03 |   |   |
| RNMT     | 4.7  | 1.0 | 6.4  | 1.4 | 3.62E-05 | 5.5   | 1.2  | 5.47E-03 |   |   |
| MAGEH1   | 4.8  | 1.0 | 6.6  | 1.4 | 1.35E-02 | 5.5   | 1.2  | 2.47E-02 |   |   |
| WWTR1    | 7.4  | 1.0 | 10.2 | 1.4 | 1.23E-02 | 10.8  | 1.5  | 1.02E-01 |   |   |
| GDF11    | 2.3  | 1.0 | 3.2  | 1.4 | 1.47E-02 | 3.3   | 1.4  | 9.48E-01 |   |   |
| MYLIP    | 3.8  | 1.0 | 5.3  | 1.4 | 2.50E-02 | 5.5   | 1.4  | 1.39E-01 |   |   |
| MGEA5    | 22.8 | 1.0 | 31.4 | 1.4 | 1.06E-04 | 31.5  | 1.4  | 1.08E-01 |   |   |
| PCDHGA2  | 1.9  | 1.0 | 2.7  | 1.4 | 1.90E-03 | 2.2   | 1.1  | 6.71E-02 |   |   |
| R3HDM2   | 8.6  | 1.0 | 11.9 | 1.4 | 1.59E-03 | 13.1  | 1.5  | 5.61E-01 |   |   |
| NT5C2    | 5.4  | 1.0 | 7.4  | 1.4 | 2.78E-03 | 7.6   | 1.4  | 9.82E-02 |   |   |
| KCTD2    | 7.4  | 1.0 | 10.2 | 1.4 | 5.41E-04 | 10.1  | 1.4  | 5.92E-01 |   |   |
| C16orf62 | 4.4  | 1.0 | 6.1  | 1.4 | 1.09E-05 | 6.3   | 1.4  | 2.52E-02 |   |   |
| ZNF467   | 1.6  | 1.0 | 2.2  | 1.4 | 1.36E-02 | 2.2   | 1.4  | 7.44E-02 |   |   |
| C5orf53  | 2.9  | 1.0 | 4.0  | 1.4 | 2.46E-03 | 3.6   | 1.2  | 4.49E-02 |   |   |
| SEPT2    | 44.1 | 1.0 | 60.5 | 1.4 | 1.81E-02 | 59.1  | 1.3  | 2.01E-01 |   |   |
| ROR1     | 3.1  | 1.0 | 4.3  | 1.4 | 4.36E-02 | 4.2   | 1.4  | 9.89E-01 |   |   |
| RNF40    | 6.4  | 1.0 | 8.8  | 1.4 | 8.10E-05 | 8.8   | 1.4  | 5.21E-02 |   |   |
| SHQ1     | 2.2  | 1.0 | 3.1  | 1.4 | 1.32E-03 | 3.0   | 1.3  | 8.13E-02 |   |   |
| SVIL     | 69.1 | 1.0 | 94.7 | 1.4 | 7.36E-03 | 108.9 | 1.6  | 4.26E-01 |   |   |
| DYNC1L12 | 16.8 | 1.0 | 23.1 | 1.4 | 1.92E-03 | 25.5  | 1.5  | 4.83E-01 |   |   |
| VIPAR    | 4.7  | 1.0 | 6.4  | 1.4 | 1.13E-04 | 6.0   | 1.3  | 4.41E-03 |   |   |
| KDM5B    | 1.9  | 1.0 | 2.6  | 1.4 | 1.49E-03 | 3.3   | 1.7  | 3.42E-01 |   |   |
| ANXA5    | 55.6 | 1.0 | 76.2 | 1.4 | 3.93E-02 | 87.7  | 1.6  | 5.28E-01 |   |   |
| ABHD11   | 3.9  | 1.0 | 5.4  | 1.4 | 2.07E-04 | 4.1   | 1.0  | 1.41E-03 |   |   |
| STMN1    | 12.6 | 1.0 | 17.3 | 1.4 | 4.86E-02 | 14.3  | 1.1  | 3.44E-02 |   |   |
| ASCC2    | 7.9  | 1.0 | 10.8 | 1.4 | 6.82E-04 | 10.8  | 1.4  | 2.79E-02 |   |   |
| FUT8     | 1.7  | 1.0 | 2.3  | 1.4 | 1.22E-02 | 2.4   | 1.4  | 1.14E-01 |   |   |
| CLK1     | 21.7 | 1.0 | 29.6 | 1.4 | 2.13E-02 | 51.0  | 2.4  | 6.94E-01 |   |   |
| MTMR9LP  | 3.1  | 1.0 | 4.3  | 1.4 | 1.41E-02 | 3.5   | 1.1  | 3.21E-02 |   |   |
| SQSTM1   | 68.2 | 1.0 | 93.2 | 1.4 | 1.68E-04 | 93.8  | 1.4  | 5.99E-02 |   |   |
| TBC1D9   | 3.7  | 1.0 | 5.0  | 1.4 | 7.13E-03 | 4.9   | 1.3  | 4.90E-02 |   |   |
| CPT1A    | 10.2 | 1.0 | 13.9 | 1.4 | 1.25E-02 | 11.2  | 1.1  | 7.15E-03 |   |   |
| WIPF1    | 3.0  | 1.0 | 4.1  | 1.4 | 3.90E-02 | 5.0   | 1.7  | 2.42E-01 |   |   |
| NLRP1    | 3.8  | 1.0 | 5.2  | 1.4 | 4.44E-02 | 6.1   | 1.6  | 1.86E-01 |   |   |
| PRR24    | 4.0  | 1.0 | 5.5  | 1.4 | 4.03E-02 | 6.1   | 1.5  | 1.56E-01 |   |   |
| MBP      | 5.9  | 1.0 | 8.0  | 1.4 | 4.68E-02 | 6.1   | 1.0  | 5.59E-03 |   |   |
| NDN      | 6.8  | 1.0 | 9.3  | 1.4 | 6.98E-03 | 8.5   | 1.2  | 4.17E-02 |   |   |
| ARF4     | 23.7 | 1.0 | 32.3 | 1.4 | 1.37E-03 | 34.4  | 1.5  | 3.48E-01 |   |   |
| SUMF2    | 6.6  | 1.0 | 9.0  | 1.4 | 2.57E-02 | 8.0   | 1.2  | 3.61E-02 |   |   |
| TRIP6    | 4.6  | 1.0 | 6.3  | 1.4 | 4.01E-02 | 7.1   | 1.5  | 2.22E-01 |   |   |
| RNF38    | 4.6  | 1.0 | 6.3  | 1.4 | 8.76E-04 | 7.7   | 1.7  | 8.37E-01 |   |   |
| COPA     | 17.7 | 1.0 | 24.1 | 1.4 | 5.79E-07 | 25.4  | 1.4  | 2.52E-01 |   |   |
| BDH2     | 4.2  | 1.0 | 5.7  | 1.4 | 4.10E-02 | 5.5   | 1.3  | 6.96E-02 |   |   |
| B9D1     | 2.1  | 1.0 | 2.8  | 1.4 | 2.01E-02 | 2.3   | 1.1  | 1.96E-01 |   |   |
| TM7SF3   | 3.2  | 1.0 | 4.4  | 1.4 | 1.83E-02 | 4.0   | 1.2  | 4.53E-02 |   |   |
| COMT     | 10.3 | 1.0 | 14.0 | 1.4 | 1.34E-03 | 14.0  | 1.4  | 3.78E-01 |   |   |
| C15orf38 | 3.3  | 1.0 | 4.4  | 1.4 | 2.51E-02 | 4.7   | 1.4  | 3.14E-01 |   |   |
| DDX39B   | 36.2 | 1.0 | 49.2 | 1.4 | 1.21E-05 | 52.5  | 1.4  | 6.41E-02 |   |   |
| FUBP3    | 7.6  | 1.0 | 10.4 | 1.4 | 1.28E-04 | 11.2  | 1.5  | 1.27E-01 |   |   |
| TTC5     | 1.7  | 1.0 | 2.3  | 1.4 | 7.28E-03 | 2.1   | 1.2  | 5.49E-03 |   |   |
| BHLHE41  | 2.7  | 1.0 | 3.7  | 1.4 | 5.01E-03 | 2.3   | -1.2 | 1.05E-04 |   |   |
| VRK3     | 3.9  | 1.0 | 5.3  | 1.4 | 1.02E-04 | 5.6   | 1.4  | 3.28E-02 |   |   |
| GPCPD1   | 3.0  | 1.0 | 4.1  | 1.4 | 1.02E-03 | 4.0   | 1.3  | 4.82E-02 |   |   |
| LMTK2    | 4.9  | 1.0 | 6.7  | 1.4 | 6.88E-04 | 5.9   | 1.2  | 4.19E-02 |   |   |

|            |      |     |      |     |          |      |      |          |   |   |
|------------|------|-----|------|-----|----------|------|------|----------|---|---|
| SPECC1     | 1.6  | 1.0 | 2.2  | 1.4 | 3.51E-02 | 2.7  | 1.7  | 7.93E-01 |   |   |
| KDSR       | 2.9  | 1.0 | 3.9  | 1.4 | 2.71E-03 | 4.0  | 1.4  | 4.72E-02 |   |   |
| SAMD4A     | 20.5 | 1.0 | 27.8 | 1.4 | 8.53E-03 | 29.1 | 1.4  | 9.44E-01 |   |   |
| MAPRE2     | 31.8 | 1.0 | 43.2 | 1.4 | 9.16E-03 | 60.8 | 1.9  | 6.14E-02 |   |   |
| BROX       | 4.1  | 1.0 | 5.6  | 1.4 | 1.45E-02 | 5.7  | 1.4  | 2.06E-01 |   |   |
| PAFAH2     | 2.4  | 1.0 | 3.3  | 1.4 | 3.00E-02 | 2.7  | 1.1  | 4.04E-02 |   |   |
| OC10050614 | 3.2  | 1.0 | 4.4  | 1.4 | 3.01E-02 | 4.2  | 1.3  | 1.19E-01 |   |   |
| FAM110B    | 4.2  | 1.0 | 5.8  | 1.4 | 4.07E-03 | 4.2  | -1.0 | 2.90E-04 | ∇ | ∇ |
| LEPROTL1   | 10.2 | 1.0 | 13.8 | 1.4 | 2.29E-03 | 9.5  | -1.1 | 3.60E-03 | ∇ | ∇ |
| CREB3L2    | 4.0  | 1.0 | 5.4  | 1.4 | 1.56E-02 | 5.2  | 1.3  | 1.20E-01 |   |   |
| CHMP5      | 13.4 | 1.0 | 18.1 | 1.4 | 2.74E-05 | 17.9 | 1.3  | 5.49E-03 |   |   |
| CYBSR1     | 46.3 | 1.0 | 62.8 | 1.4 | 2.03E-03 | 53.1 | 1.1  | 7.68E-02 |   |   |
| C17orf85   | 3.8  | 1.0 | 5.2  | 1.4 | 3.44E-03 | 6.0  | 1.6  | 2.18E-01 |   |   |
| PTPDC1     | 2.1  | 1.0 | 2.9  | 1.4 | 1.07E-02 | 3.5  | 1.6  | 5.63E-01 |   |   |
| TNFRSF25   | 3.3  | 1.0 | 4.4  | 1.4 | 3.54E-02 | 3.7  | 1.1  | 2.87E-02 |   |   |
| GFPT1      | 3.8  | 1.0 | 5.1  | 1.4 | 8.25E-03 | 5.3  | 1.4  | 6.40E-01 |   |   |
| STAG3L1    | 1.8  | 1.0 | 2.5  | 1.4 | 3.31E-02 | 2.4  | 1.3  | 9.93E-02 |   |   |
| MPHOSPH8   | 9.4  | 1.0 | 12.7 | 1.4 | 1.43E-04 | 12.6 | 1.3  | 1.53E-02 |   |   |
| ABCA3      | 1.9  | 1.0 | 2.6  | 1.4 | 2.20E-04 | 2.2  | 1.1  | 1.71E-02 |   |   |
| RRAGB      | 2.9  | 1.0 | 3.9  | 1.4 | 5.57E-03 | 3.2  | 1.1  | 3.38E-03 |   |   |
| NAB1       | 5.0  | 1.0 | 6.8  | 1.4 | 2.63E-02 | 6.5  | 1.3  | 1.11E-01 |   |   |
| C8orf41    | 1.9  | 1.0 | 2.6  | 1.4 | 4.66E-04 | 2.5  | 1.3  | 1.76E-02 |   |   |
| PI4K2A     | 4.3  | 1.0 | 5.8  | 1.4 | 1.25E-03 | 7.8  | 1.8  | 4.07E-01 |   |   |
| CUX1       | 24.5 | 1.0 | 33.1 | 1.4 | 3.66E-03 | 32.8 | 1.3  | 5.63E-01 |   |   |
| PGM3       | 1.9  | 1.0 | 2.6  | 1.4 | 9.72E-03 | 2.7  | 1.4  | 3.12E-01 |   |   |
| SP110      | 2.6  | 1.0 | 3.5  | 1.4 | 4.31E-02 | 3.4  | 1.3  | 8.55E-02 |   |   |
| LNX2       | 2.5  | 1.0 | 3.4  | 1.4 | 2.32E-04 | 3.2  | 1.3  | 1.22E-02 |   |   |
| MAP7D3     | 4.0  | 1.0 | 5.3  | 1.4 | 5.20E-04 | 5.4  | 1.4  | 5.10E-02 |   |   |
| FAM111A    | 2.0  | 1.0 | 2.7  | 1.4 | 3.51E-02 | 2.7  | 1.4  | 1.30E-01 |   |   |
| C22orf46   | 4.1  | 1.0 | 5.5  | 1.4 | 5.59E-03 | 5.5  | 1.3  | 2.24E-01 |   |   |
| MPV17      | 9.9  | 1.0 | 13.3 | 1.4 | 6.95E-03 | 11.3 | 1.1  | 3.43E-02 |   |   |
| MTMR3      | 4.8  | 1.0 | 6.5  | 1.3 | 1.63E-03 | 7.1  | 1.5  | 4.94E-01 |   |   |
| CASP3      | 3.1  | 1.0 | 4.1  | 1.3 | 2.72E-02 | 8.4  | 2.8  | 5.40E-02 |   |   |
| CNKSR3     | 3.4  | 1.0 | 4.6  | 1.3 | 1.94E-02 | 6.5  | 1.9  | 4.24E-01 |   |   |
| RABEPK     | 3.1  | 1.0 | 4.2  | 1.3 | 2.40E-02 | 3.7  | 1.2  | 3.21E-02 |   |   |
| NTN4       | 20.3 | 1.0 | 27.3 | 1.3 | 5.96E-03 | 19.3 | -1.0 | 2.34E-03 | ∇ | ∇ |
| FUT11      | 3.4  | 1.0 | 4.5  | 1.3 | 1.86E-03 | 4.0  | 1.2  | 1.95E-02 |   |   |
| SLC23A2    | 2.2  | 1.0 | 3.0  | 1.3 | 4.65E-02 | 3.0  | 1.3  | 9.24E-02 |   |   |
| WBP1       | 14.1 | 1.0 | 18.9 | 1.3 | 2.23E-03 | 18.3 | 1.3  | 9.45E-02 |   |   |
| DST        | 23.5 | 1.0 | 31.6 | 1.3 | 4.04E-04 | 30.0 | 1.3  | 2.00E-01 |   |   |
| TULP3      | 2.6  | 1.0 | 3.5  | 1.3 | 3.13E-02 | 4.1  | 1.6  | 2.86E-01 |   |   |
| NDE1       | 2.0  | 1.0 | 2.6  | 1.3 | 2.91E-03 | 3.0  | 1.5  | 2.47E-01 |   |   |
| TTC23      | 2.2  | 1.0 | 2.9  | 1.3 | 2.58E-04 | 3.0  | 1.4  | 1.73E-01 |   |   |
| CCDC82     | 3.3  | 1.0 | 4.5  | 1.3 | 1.60E-02 | 4.6  | 1.4  | 1.23E-01 |   |   |
| STX16      | 9.7  | 1.0 | 13.0 | 1.3 | 6.48E-03 | 13.9 | 1.4  | 1.27E-01 |   |   |
| TAF1       | 2.6  | 1.0 | 3.5  | 1.3 | 6.35E-03 | 3.6  | 1.4  | 1.38E-01 |   |   |
| MYCBP      | 1.8  | 1.0 | 2.4  | 1.3 | 1.55E-02 | 2.3  | 1.3  | 2.42E-01 |   |   |
| C10orf71   | 18.2 | 1.0 | 24.4 | 1.3 | 2.61E-02 | 21.0 | 1.2  | 2.92E-01 |   |   |
| SMAD1      | 3.2  | 1.0 | 4.2  | 1.3 | 3.75E-03 | 4.7  | 1.5  | 4.34E-01 |   |   |
| ACBD4      | 2.6  | 1.0 | 3.5  | 1.3 | 1.10E-02 | 2.9  | 1.1  | 9.40E-03 |   |   |
| YEATS2     | 2.4  | 1.0 | 3.2  | 1.3 | 8.85E-03 | 2.8  | 1.2  | 5.29E-02 |   |   |
| PFN2       | 13.0 | 1.0 | 17.5 | 1.3 | 2.95E-02 | 14.2 | 1.1  | 2.34E-02 |   |   |
| ZNF691     | 2.3  | 1.0 | 3.0  | 1.3 | 1.89E-02 | 2.7  | 1.2  | 1.72E-01 |   |   |
| MAP2K3     | 9.2  | 1.0 | 12.4 | 1.3 | 2.02E-03 | 14.7 | 1.6  | 5.84E-01 |   |   |
| DPM2       | 2.9  | 1.0 | 3.9  | 1.3 | 2.35E-02 | 4.1  | 1.4  | 2.27E-01 |   |   |
| USP22      | 19.9 | 1.0 | 26.7 | 1.3 | 1.65E-05 | 27.3 | 1.4  | 1.44E-01 |   |   |
| HSPH1      | 10.3 | 1.0 | 13.9 | 1.3 | 2.50E-04 | 21.8 | 2.1  | 2.07E-01 |   |   |
| CAPN3      | 3.2  | 1.0 | 4.3  | 1.3 | 2.55E-02 | 4.9  | 1.5  | 2.38E-01 |   |   |
| MED17      | 3.3  | 1.0 | 4.4  | 1.3 | 1.25E-04 | 4.7  | 1.4  | 3.23E-01 |   |   |
| KLHL12     | 5.5  | 1.0 | 7.4  | 1.3 | 3.65E-05 | 7.4  | 1.3  | 1.66E-02 |   |   |
| KIF13B     | 1.9  | 1.0 | 2.5  | 1.3 | 3.83E-02 | 3.7  | 2.0  | 6.20E-01 |   |   |
| SORD       | 2.9  | 1.0 | 3.9  | 1.3 | 2.79E-02 | 2.4  | -1.2 | 4.73E-04 |   |   |
| VPS8       | 9.4  | 1.0 | 12.6 | 1.3 | 6.62E-03 | 10.8 | 1.1  | 9.00E-03 |   |   |
| ARL15      | 3.2  | 1.0 | 4.2  | 1.3 | 2.66E-02 | 5.5  | 1.7  | 5.24E-01 |   |   |
| TMED4      | 18.6 | 1.0 | 24.9 | 1.3 | 5.90E-05 | 22.0 | 1.2  | 9.64E-03 |   |   |
| EHMT2      | 2.7  | 1.0 | 3.6  | 1.3 | 8.31E-03 | 3.0  | 1.1  | 2.23E-02 |   |   |
| NRN1       | 3.0  | 1.0 | 4.0  | 1.3 | 3.10E-02 | 3.2  | 1.1  | 4.09E-02 |   |   |
| SPPL3      | 4.4  | 1.0 | 5.8  | 1.3 | 8.69E-04 | 5.4  | 1.2  | 1.14E-02 |   |   |
| FBXO8      | 4.5  | 1.0 | 6.0  | 1.3 | 2.26E-04 | 6.2  | 1.4  | 3.20E-01 |   |   |
| C10orf57   | 2.3  | 1.0 | 3.1  | 1.3 | 1.61E-03 | 2.5  | 1.1  | 6.55E-03 |   |   |
| LENG1      | 4.8  | 1.0 | 6.4  | 1.3 | 1.22E-02 | 6.4  | 1.3  | 3.04E-01 |   |   |
| FNDC3A     | 4.4  | 1.0 | 5.9  | 1.3 | 1.73E-02 | 6.1  | 1.4  | 1.43E-01 |   |   |
| CSorf4     | 9.6  | 1.0 | 12.8 | 1.3 | 4.42E-02 | 12.2 | 1.3  | 1.12E-01 |   |   |
| ZC3H8      | 2.2  | 1.0 | 3.0  | 1.3 | 1.27E-02 | 2.6  | 1.2  | 7.69E-02 |   |   |
| UBAC2      | 7.5  | 1.0 | 10.0 | 1.3 | 1.54E-05 | 10.0 | 1.3  | 4.61E-02 |   |   |
| AP4S1      | 2.3  | 1.0 | 3.0  | 1.3 | 1.78E-03 | 2.7  | 1.2  | 4.17E-02 |   |   |
| C9orf119   | 4.4  | 1.0 | 5.9  | 1.3 | 3.04E-03 | 4.9  | 1.1  | 2.07E-02 |   |   |
| ERC1       | 5.6  | 1.0 | 7.5  | 1.3 | 6.40E-04 | 7.2  | 1.3  | 2.57E-02 |   |   |
| PFKL       | 11.4 | 1.0 | 15.2 | 1.3 | 1.70E-02 | 14.2 | 1.2  | 3.94E-02 |   |   |
| RGS3       | 19.8 | 1.0 | 26.4 | 1.3 | 9.83E-03 | 21.2 | 1.1  | 1.67E-01 |   |   |
| DAP        | 8.9  | 1.0 | 11.9 | 1.3 | 4.92E-02 | 11.3 | 1.3  | 9.69E-02 |   |   |
| HEG1       | 14.8 | 1.0 | 19.7 | 1.3 | 6.51E-03 | 20.7 | 1.4  | 2.16E-01 |   |   |
| PCGF2      | 3.6  | 1.0 | 4.8  | 1.3 | 1.26E-02 | 5.1  | 1.4  | 2.67E-01 |   |   |
| PPWD1      | 5.6  | 1.0 | 7.5  | 1.3 | 2.66E-03 | 7.2  | 1.3  | 3.18E-02 |   |   |
| CDC42SE1   | 6.4  | 1.0 | 8.6  | 1.3 | 2.49E-02 | 13.5 | 2.1  | 7.70E-01 |   |   |
| NME7       | 2.3  | 1.0 | 3.0  | 1.3 | 4.06E-03 | 2.6  | 1.2  | 6.75E-02 |   |   |
| MAN1A2     | 2.2  | 1.0 | 2.9  | 1.3 | 3.38E-02 | 2.6  | 1.2  | 2.30E-01 |   |   |
| CLSTN1     | 11.5 | 1.0 | 15.3 | 1.3 | 6.68E-04 | 13.6 | 1.2  | 1.49E-02 |   |   |



|            |       |     |       |     |          |       |      |          |   |   |
|------------|-------|-----|-------|-----|----------|-------|------|----------|---|---|
| KLHDC4     | 2.1   | 1.0 | 2.7   | 1.3 | 1.56E-02 | 3.0   | 1.4  | 1.32E-01 |   |   |
| DPCD       | 7.3   | 1.0 | 9.8   | 1.3 | 6.83E-03 | 7.0   | -1.1 | 1.19E-02 | √ | √ |
| ARFIP1     | 2.9   | 1.0 | 3.8   | 1.3 | 6.66E-03 | 4.0   | 1.4  | 1.57E-01 |   |   |
| SPECC1L    | 6.1   | 1.0 | 8.2   | 1.3 | 1.73E-04 | 7.3   | 1.2  | 3.53E-02 |   |   |
| PKD1       | 11.1  | 1.0 | 14.7  | 1.3 | 8.36E-03 | 15.6  | 1.4  | 6.75E-01 |   |   |
| RNF146     | 14.5  | 1.0 | 19.3  | 1.3 | 9.01E-03 | 26.6  | 1.8  | 8.38E-01 |   |   |
| IL18BP     | 2.4   | 1.0 | 3.2   | 1.3 | 2.09E-02 | 3.0   | 1.3  | 6.68E-02 |   |   |
| CCND2      | 22.1  | 1.0 | 29.4  | 1.3 | 3.57E-02 | 23.8  | 1.1  | 1.39E-02 |   |   |
| USP46      | 5.2   | 1.0 | 6.9   | 1.3 | 2.94E-03 | 8.4   | 1.6  | 1.98E-01 |   |   |
| SLC35B3    | 2.3   | 1.0 | 3.0   | 1.3 | 3.17E-02 | 3.4   | 1.5  | 2.68E-01 |   |   |
| PHF15      | 3.3   | 1.0 | 4.4   | 1.3 | 2.16E-03 | 4.2   | 1.3  | 3.68E-03 |   |   |
| BPHL       | 3.3   | 1.0 | 4.4   | 1.3 | 2.71E-02 | 3.8   | 1.2  | 6.43E-02 |   |   |
| NBPF10     | 1.6   | 1.0 | 2.1   | 1.3 | 3.40E-02 | 2.1   | 1.4  | 2.63E-01 |   |   |
| HEXB       | 25.6  | 1.0 | 34.1  | 1.3 | 7.61E-03 | 31.1  | 1.2  | 5.22E-03 |   |   |
| CDC42EP1   | 6.3   | 1.0 | 8.3   | 1.3 | 4.46E-02 | 10.1  | 1.6  | 4.65E-01 |   |   |
| CFI        | 4.1   | 1.0 | 5.4   | 1.3 | 4.10E-02 | 5.8   | 1.4  | 1.11E-01 |   |   |
| COQ10B     | 6.3   | 1.0 | 8.4   | 1.3 | 4.01E-04 | 9.1   | 1.4  | 1.87E-01 |   |   |
| CCDC137    | 1.8   | 1.0 | 2.4   | 1.3 | 1.93E-04 | 2.6   | 1.4  | 9.67E-02 |   |   |
| ANKMY2     | 8.5   | 1.0 | 11.2  | 1.3 | 3.01E-03 | 8.5   | 1.0  | 4.14E-03 |   |   |
| RENBP      | 2.4   | 1.0 | 3.2   | 1.3 | 3.05E-02 | 2.8   | 1.2  | 4.61E-02 |   |   |
| ZNF259     | 5.3   | 1.0 | 7.0   | 1.3 | 3.43E-04 | 7.8   | 1.5  | 1.37E-01 |   |   |
| AMT        | 7.7   | 1.0 | 10.2  | 1.3 | 7.54E-03 | 8.7   | 1.1  | 5.90E-03 |   |   |
| LATS2      | 4.6   | 1.0 | 6.0   | 1.3 | 3.19E-03 | 8.8   | 1.9  | 5.99E-01 |   |   |
| C20orf194  | 6.2   | 1.0 | 8.3   | 1.3 | 2.94E-03 | 7.4   | 1.2  | 6.30E-02 |   |   |
| CASP4      | 5.3   | 1.0 | 7.1   | 1.3 | 4.71E-02 | 8.4   | 1.6  | 1.97E-01 |   |   |
| RYBP       | 2.9   | 1.0 | 3.9   | 1.3 | 4.10E-02 | 5.5   | 1.9  | 7.36E-01 |   |   |
| ARHGEF9    | 7.6   | 1.0 | 10.0  | 1.3 | 3.91E-04 | 8.7   | 1.1  | 3.53E-02 |   |   |
| FAM177A1   | 7.1   | 1.0 | 9.4   | 1.3 | 1.07E-02 | 9.9   | 1.4  | 8.22E-01 |   |   |
| AKAP2      | 19.8  | 1.0 | 26.2  | 1.3 | 9.26E-03 | 25.1  | 1.3  | 3.21E-03 |   |   |
| RPE        | 2.1   | 1.0 | 2.8   | 1.3 | 3.57E-03 | 2.8   | 1.3  | 6.35E-02 |   |   |
| FAM115A    | 7.9   | 1.0 | 10.4  | 1.3 | 3.62E-03 | 10.3  | 1.3  | 3.34E-01 |   |   |
| FCF1       | 2.9   | 1.0 | 3.8   | 1.3 | 1.11E-03 | 3.9   | 1.4  | 2.60E-01 |   |   |
| MAP2K5     | 4.0   | 1.0 | 5.3   | 1.3 | 2.55E-03 | 5.2   | 1.3  | 4.98E-02 |   |   |
| METRN      | 7.3   | 1.0 | 9.6   | 1.3 | 1.33E-02 | 8.7   | 1.2  | 4.73E-02 |   |   |
| NEK1       | 2.6   | 1.0 | 3.5   | 1.3 | 7.21E-03 | 3.2   | 1.2  | 1.45E-01 |   |   |
| GLG1       | 10.5  | 1.0 | 13.9  | 1.3 | 4.74E-04 | 14.7  | 1.4  | 3.26E-01 |   |   |
| CRELD1     | 15.5  | 1.0 | 20.5  | 1.3 | 2.05E-03 | 16.9  | 1.1  | 5.04E-03 |   |   |
| ZNF521     | 2.0   | 1.0 | 2.6   | 1.3 | 3.97E-02 | 2.3   | 1.2  | 3.61E-02 |   |   |
| CETN3      | 5.8   | 1.0 | 7.6   | 1.3 | 8.43E-04 | 6.5   | 1.1  | 2.23E-02 |   |   |
| BRF2       | 2.9   | 1.0 | 3.8   | 1.3 | 8.65E-04 | 3.1   | 1.1  | 1.47E-03 |   |   |
| PJA1       | 4.0   | 1.0 | 5.2   | 1.3 | 2.75E-02 | 4.6   | 1.2  | 1.06E-01 |   |   |
| GTPBP1     | 4.4   | 1.0 | 5.9   | 1.3 | 8.78E-05 | 6.7   | 1.5  | 1.81E-01 |   |   |
| CWC22      | 2.8   | 1.0 | 3.7   | 1.3 | 1.33E-03 | 4.2   | 1.5  | 2.61E-01 |   |   |
| SEC61A2    | 2.8   | 1.0 | 3.7   | 1.3 | 2.83E-05 | 3.5   | 1.2  | 7.94E-02 |   |   |
| RBP7       | 12.5  | 1.0 | 16.5  | 1.3 | 3.34E-02 | 17.9  | 1.4  | 9.92E-02 |   |   |
| XPO1       | 12.5  | 1.0 | 16.5  | 1.3 | 6.16E-04 | 18.0  | 1.4  | 2.20E-01 |   |   |
| PPCS       | 10.5  | 1.0 | 13.8  | 1.3 | 4.81E-04 | 12.5  | 1.2  | 1.73E-02 |   |   |
| SRXN1      | 2.3   | 1.0 | 3.1   | 1.3 | 1.92E-03 | 2.2   | -1.1 | 6.64E-04 | √ | √ |
| PIGT       | 42.0  | 1.0 | 55.4  | 1.3 | 2.75E-02 | 38.1  | -1.1 | 3.17E-03 | √ | √ |
| CCDC28A    | 3.8   | 1.0 | 5.0   | 1.3 | 4.65E-03 | 5.8   | 1.5  | 1.76E-01 |   |   |
| NUP188     | 3.8   | 1.0 | 5.0   | 1.3 | 3.58E-03 | 6.9   | 1.8  | 2.46E-01 |   |   |
| MLYCD      | 39.9  | 1.0 | 52.7  | 1.3 | 1.16E-02 | 47.5  | 1.2  | 6.25E-02 |   |   |
| TRAFD1     | 5.7   | 1.0 | 7.5   | 1.3 | 2.48E-03 | 11.0  | 1.9  | 2.71E-01 |   |   |
| MGAT5      | 10.6  | 1.0 | 14.0  | 1.3 | 1.67E-02 | 11.1  | 1.0  | 3.11E-02 |   |   |
| GATA6      | 14.1  | 1.0 | 18.6  | 1.3 | 1.49E-03 | 19.9  | 1.4  | 4.70E-01 |   |   |
| ZEB2       | 8.5   | 1.0 | 11.2  | 1.3 | 2.35E-02 | 10.0  | 1.2  | 1.31E-01 |   |   |
| PLEKHA2    | 5.2   | 1.0 | 6.9   | 1.3 | 1.21E-02 | 6.1   | 1.2  | 9.63E-03 |   |   |
| DOCK1      | 4.4   | 1.0 | 5.8   | 1.3 | 1.54E-02 | 6.2   | 1.4  | 1.72E-01 |   |   |
| CLIP2      | 1.8   | 1.0 | 2.4   | 1.3 | 9.92E-03 | 2.0   | 1.1  | 4.00E-03 |   |   |
| ACSL4      | 7.6   | 1.0 | 9.9   | 1.3 | 1.26E-03 | 11.8  | 1.6  | 5.74E-01 |   |   |
| SLC2A12    | 4.0   | 1.0 | 5.3   | 1.3 | 3.14E-02 | 4.7   | 1.2  | 1.31E-01 |   |   |
| SEC22B     | 8.9   | 1.0 | 11.7  | 1.3 | 1.33E-03 | 11.8  | 1.3  | 9.24E-02 |   |   |
| ATG14      | 4.6   | 1.0 | 6.1   | 1.3 | 7.16E-03 | 6.3   | 1.4  | 1.07E-01 |   |   |
| IRF2       | 5.0   | 1.0 | 6.6   | 1.3 | 2.01E-03 | 6.0   | 1.2  | 2.70E-02 |   |   |
| MSH2       | 3.3   | 1.0 | 4.3   | 1.3 | 1.38E-02 | 3.7   | 1.1  | 6.13E-03 |   |   |
| HEXA       | 11.5  | 1.0 | 15.1  | 1.3 | 1.75E-02 | 13.7  | 1.2  | 1.18E-02 |   |   |
| PTPN14     | 2.5   | 1.0 | 3.2   | 1.3 | 2.19E-02 | 4.2   | 1.7  | 4.62E-01 |   |   |
| DDX18      | 5.9   | 1.0 | 7.7   | 1.3 | 1.32E-03 | 8.1   | 1.4  | 9.62E-02 |   |   |
| SEMA3G     | 4.2   | 1.0 | 5.5   | 1.3 | 2.54E-02 | 6.1   | 1.4  | 1.10E-01 |   |   |
| ACAD11     | 7.5   | 1.0 | 9.9   | 1.3 | 1.42E-03 | 8.0   | 1.1  | 4.08E-03 |   |   |
| BCOR       | 3.3   | 1.0 | 4.3   | 1.3 | 2.75E-03 | 4.4   | 1.4  | 2.72E-01 |   |   |
| DPM1       | 15.0  | 1.0 | 19.7  | 1.3 | 3.15E-03 | 17.6  | 1.2  | 4.73E-03 |   |   |
| NRP1       | 21.7  | 1.0 | 28.5  | 1.3 | 3.91E-03 | 18.3  | -1.2 | 7.22E-04 |   |   |
| HFE2       | 13.2  | 1.0 | 17.4  | 1.3 | 2.62E-02 | 16.9  | 1.3  | 7.59E-01 |   |   |
| TRIM52     | 2.6   | 1.0 | 3.5   | 1.3 | 8.60E-03 | 3.4   | 1.3  | 1.39E-01 |   |   |
| RBM4B      | 3.3   | 1.0 | 4.3   | 1.3 | 5.13E-03 | 4.3   | 1.3  | 4.56E-02 |   |   |
| ST6GALNAC4 | 6.5   | 1.0 | 8.5   | 1.3 | 1.39E-02 | 7.8   | 1.2  | 1.88E-01 |   |   |
| BCLAF1     | 8.7   | 1.0 | 11.5  | 1.3 | 1.06E-03 | 13.4  | 1.5  | 3.64E-01 |   |   |
| SMEK2      | 4.6   | 1.0 | 6.0   | 1.3 | 2.51E-03 | 7.1   | 1.5  | 2.91E-01 |   |   |
| RAB7L1     | 2.3   | 1.0 | 3.1   | 1.3 | 2.25E-02 | 2.3   | -1.0 | 7.15E-03 | √ | √ |
| KCTD7      | 2.6   | 1.0 | 3.4   | 1.3 | 2.10E-02 | 3.0   | 1.2  | 6.56E-02 |   |   |
| HSPA8      | 306.3 | 1.0 | 401.9 | 1.3 | 4.13E-03 | 510.7 | 1.7  | 1.16E-01 |   |   |
| CDKN2AIP   | 3.1   | 1.0 | 4.1   | 1.3 | 5.16E-03 | 4.2   | 1.4  | 9.02E-02 |   |   |
| CBY1       | 13.4  | 1.0 | 17.6  | 1.3 | 7.50E-04 | 16.5  | 1.2  | 1.93E-02 |   |   |
| ATP2C1     | 12.8  | 1.0 | 16.7  | 1.3 | 1.75E-04 | 17.7  | 1.4  | 2.41E-01 |   |   |
| LDLRAP1    | 3.2   | 1.0 | 4.1   | 1.3 | 3.22E-03 | 3.5   | 1.1  | 7.07E-03 |   |   |
| CPOX       | 2.9   | 1.0 | 3.8   | 1.3 | 2.88E-03 | 3.1   | 1.1  | 2.39E-03 |   |   |
| CHPF2      | 4.2   | 1.0 | 5.5   | 1.3 | 2.56E-02 | 5.5   | 1.3  | 4.46E-01 |   |   |

|           |      |     |      |     |          |      |     |          |  |  |
|-----------|------|-----|------|-----|----------|------|-----|----------|--|--|
| NFASC     | 3.3  | 1.0 | 4.3  | 1.3 | 3.32E-02 | 4.8  | 1.4 | 5.75E-01 |  |  |
| TERF1     | 3.7  | 1.0 | 4.8  | 1.3 | 3.93E-05 | 4.2  | 1.1 | 2.52E-03 |  |  |
| WLS       | 16.3 | 1.0 | 21.3 | 1.3 | 1.02E-02 | 21.2 | 1.3 | 3.22E-02 |  |  |
| GOLGA3    | 4.5  | 1.0 | 5.9  | 1.3 | 2.23E-02 | 6.7  | 1.5 | 7.98E-01 |  |  |
| CHID1     | 5.4  | 1.0 | 7.1  | 1.3 | 7.87E-03 | 7.0  | 1.3 | 4.27E-02 |  |  |
| TMED3     | 7.3  | 1.0 | 9.5  | 1.3 | 2.85E-02 | 8.6  | 1.2 | 1.21E-01 |  |  |
| WIPI1     | 27.7 | 1.0 | 36.3 | 1.3 | 2.55E-02 | 32.3 | 1.2 | 8.92E-02 |  |  |
| SH3YL1    | 2.1  | 1.0 | 2.7  | 1.3 | 2.82E-02 | 2.8  | 1.3 | 1.02E-01 |  |  |
| GEMIN8    | 1.8  | 1.0 | 2.4  | 1.3 | 1.67E-02 | 2.5  | 1.4 | 2.63E-01 |  |  |
| SKI       | 7.1  | 1.0 | 9.2  | 1.3 | 9.09E-03 | 10.3 | 1.5 | 3.45E-01 |  |  |
| CHMP4A    | 9.8  | 1.0 | 12.9 | 1.3 | 1.06E-04 | 12.8 | 1.3 | 2.19E-02 |  |  |
| KIAA1671  | 1.7  | 1.0 | 2.2  | 1.3 | 2.76E-02 | 1.9  | 1.1 | 3.81E-02 |  |  |
| EFR3A     | 9.3  | 1.0 | 12.2 | 1.3 | 2.99E-02 | 12.6 | 1.4 | 4.36E-01 |  |  |
| TUT1      | 2.7  | 1.0 | 3.6  | 1.3 | 4.62E-04 | 3.5  | 1.3 | 3.62E-02 |  |  |
| ZNF419    | 1.8  | 1.0 | 2.3  | 1.3 | 1.76E-03 | 2.5  | 1.4 | 9.13E-01 |  |  |
| RAP1B     | 13.2 | 1.0 | 17.2 | 1.3 | 2.87E-02 | 19.4 | 1.5 | 1.83E-01 |  |  |
| SMURF2    | 2.0  | 1.0 | 2.6  | 1.3 | 5.28E-03 | 3.0  | 1.5 | 3.07E-01 |  |  |
| CHCHD5    | 5.3  | 1.0 | 6.9  | 1.3 | 1.65E-03 | 5.7  | 1.1 | 4.03E-04 |  |  |
| SS18      | 8.3  | 1.0 | 10.9 | 1.3 | 2.43E-03 | 12.0 | 1.4 | 2.54E-01 |  |  |
| IGF1R     | 4.7  | 1.0 | 6.2  | 1.3 | 3.66E-02 | 6.3  | 1.3 | 1.73E-01 |  |  |
| FKBP7     | 1.8  | 1.0 | 2.3  | 1.3 | 4.63E-02 | 2.0  | 1.1 | 5.90E-02 |  |  |
| TTL1      | 2.7  | 1.0 | 3.6  | 1.3 | 2.27E-03 | 2.7  | 1.0 | 8.90E-03 |  |  |
| RNF103    | 16.0 | 1.0 | 20.9 | 1.3 | 1.60E-02 | 23.8 | 1.5 | 7.70E-01 |  |  |
| ALDH3A2   | 10.6 | 1.0 | 13.9 | 1.3 | 4.68E-03 | 13.0 | 1.2 | 1.19E-01 |  |  |
| UNC45A    | 5.0  | 1.0 | 6.5  | 1.3 | 7.00E-03 | 6.5  | 1.3 | 7.50E-02 |  |  |
| LENG8     | 29.1 | 1.0 | 38.0 | 1.3 | 1.02E-02 | 40.3 | 1.4 | 1.06E-01 |  |  |
| PYGO2     | 3.7  | 1.0 | 4.8  | 1.3 | 1.16E-02 | 4.9  | 1.3 | 6.52E-02 |  |  |
| KIFC3     | 12.6 | 1.0 | 16.5 | 1.3 | 4.85E-03 | 12.7 | 1.0 | 2.41E-02 |  |  |
| ADCY4     | 7.3  | 1.0 | 9.5  | 1.3 | 1.54E-02 | 9.4  | 1.3 | 5.73E-02 |  |  |
| C6orf62   | 12.3 | 1.0 | 16.0 | 1.3 | 1.27E-02 | 17.5 | 1.4 | 1.68E-01 |  |  |
| ZNF263    | 2.5  | 1.0 | 3.3  | 1.3 | 6.88E-03 | 4.4  | 1.7 | 5.37E-01 |  |  |
| NEIL2     | 2.6  | 1.0 | 3.4  | 1.3 | 3.01E-02 | 3.0  | 1.2 | 2.79E-01 |  |  |
| CLUAP1    | 4.4  | 1.0 | 5.8  | 1.3 | 4.42E-03 | 5.2  | 1.2 | 2.03E-02 |  |  |
| MPRIP     | 37.6 | 1.0 | 49.0 | 1.3 | 8.16E-04 | 52.5 | 1.4 | 9.44E-01 |  |  |
| LRP3      | 3.8  | 1.0 | 4.9  | 1.3 | 2.58E-02 | 4.9  | 1.3 | 9.57E-02 |  |  |
| PDGFC     | 2.5  | 1.0 | 3.2  | 1.3 | 7.08E-03 | 3.0  | 1.2 | 2.30E-02 |  |  |
| ZNF337    | 3.5  | 1.0 | 4.6  | 1.3 | 1.20E-02 | 5.1  | 1.4 | 1.91E-01 |  |  |
| ACACA     | 2.0  | 1.0 | 2.6  | 1.3 | 4.41E-03 | 2.2  | 1.1 | 1.54E-02 |  |  |
| ARMC10    | 4.4  | 1.0 | 5.7  | 1.3 | 7.10E-03 | 5.3  | 1.2 | 2.62E-02 |  |  |
| TCEAL8    | 8.5  | 1.0 | 11.0 | 1.3 | 1.08E-04 | 8.7  | 1.0 | 8.47E-05 |  |  |
| ESYT1     | 7.4  | 1.0 | 9.6  | 1.3 | 1.43E-02 | 9.3  | 1.3 | 5.35E-02 |  |  |
| PRKACB    | 5.0  | 1.0 | 6.4  | 1.3 | 2.25E-03 | 6.3  | 1.3 | 1.25E-01 |  |  |
| FGD5      | 3.4  | 1.0 | 4.5  | 1.3 | 3.88E-02 | 4.5  | 1.3 | 1.53E-01 |  |  |
| EIF2S3    | 11.8 | 1.0 | 15.3 | 1.3 | 1.46E-02 | 15.6 | 1.3 | 9.42E-02 |  |  |
| BBS2      | 11.5 | 1.0 | 15.0 | 1.3 | 1.84E-03 | 13.7 | 1.2 | 5.80E-03 |  |  |
| KIDINS220 | 10.7 | 1.0 | 13.8 | 1.3 | 6.57E-04 | 13.4 | 1.3 | 7.60E-02 |  |  |
| ANKH      | 11.8 | 1.0 | 15.4 | 1.3 | 5.76E-03 | 14.4 | 1.2 | 1.14E-01 |  |  |
| DYNLT1    | 26.1 | 1.0 | 33.8 | 1.3 | 2.86E-04 | 39.9 | 1.5 | 3.80E-01 |  |  |
| C14orf1   | 2.9  | 1.0 | 3.8  | 1.3 | 4.54E-03 | 3.4  | 1.2 | 5.00E-02 |  |  |
| AKIRIN2   | 8.4  | 1.0 | 10.9 | 1.3 | 7.01E-04 | 12.3 | 1.5 | 1.02E-01 |  |  |
| OXCT1     | 62.7 | 1.0 | 81.2 | 1.3 | 2.36E-02 | 79.6 | 1.3 | 6.42E-01 |  |  |
| SCRN2     | 7.7  | 1.0 | 10.0 | 1.3 | 9.08E-03 | 9.2  | 1.2 | 4.01E-02 |  |  |
| JMY       | 1.9  | 1.0 | 2.5  | 1.3 | 5.54E-03 | 2.9  | 1.5 | 2.58E-01 |  |  |
| C7orf50   | 14.3 | 1.0 | 18.5 | 1.3 | 2.42E-04 | 15.5 | 1.1 | 6.34E-03 |  |  |
| CYLD      | 2.9  | 1.0 | 3.7  | 1.3 | 3.63E-03 | 4.8  | 1.7 | 4.48E-01 |  |  |
| CASD1     | 4.7  | 1.0 | 6.1  | 1.3 | 1.16E-04 | 5.8  | 1.2 | 9.25E-03 |  |  |
| PHF19     | 2.3  | 1.0 | 3.0  | 1.3 | 4.63E-02 | 3.3  | 1.4 | 3.08E-01 |  |  |
| RWDD2A    | 2.0  | 1.0 | 2.6  | 1.3 | 2.45E-02 | 2.6  | 1.3 | 5.76E-01 |  |  |
| UPF1      | 7.3  | 1.0 | 9.4  | 1.3 | 1.56E-03 | 11.3 | 1.5 | 4.89E-01 |  |  |
| ZNF512    | 5.3  | 1.0 | 6.8  | 1.3 | 2.18E-03 | 7.1  | 1.3 | 9.66E-02 |  |  |
| CDK7      | 3.6  | 1.0 | 4.7  | 1.3 | 2.66E-03 | 4.3  | 1.2 | 3.27E-03 |  |  |
| EPB41L1   | 3.0  | 1.0 | 3.9  | 1.3 | 1.58E-02 | 3.0  | 1.0 | 1.09E-03 |  |  |
| CCNI      | 52.4 | 1.0 | 67.9 | 1.3 | 1.17E-03 | 75.8 | 1.4 | 1.97E-01 |  |  |
| ARHGEF12  | 13.2 | 1.0 | 17.1 | 1.3 | 7.47E-03 | 17.4 | 1.3 | 5.56E-01 |  |  |
| GNG12     | 7.6  | 1.0 | 9.9  | 1.3 | 3.49E-02 | 12.7 | 1.7 | 8.32E-01 |  |  |
| BEX4      | 17.9 | 1.0 | 23.1 | 1.3 | 7.93E-03 | 20.4 | 1.1 | 4.00E-04 |  |  |
| HPS5      | 2.1  | 1.0 | 2.7  | 1.3 | 1.17E-02 | 2.8  | 1.3 | 9.17E-02 |  |  |
| YPEL1     | 1.9  | 1.0 | 2.4  | 1.3 | 4.26E-02 | 3.1  | 1.7 | 6.66E-01 |  |  |
| PCCB      | 28.4 | 1.0 | 36.7 | 1.3 | 1.71E-03 | 31.6 | 1.1 | 4.12E-02 |  |  |
| COMMD6    | 8.8  | 1.0 | 11.3 | 1.3 | 4.77E-03 | 11.7 | 1.3 | 1.22E-01 |  |  |
| CDK10     | 5.2  | 1.0 | 6.7  | 1.3 | 3.34E-02 | 7.3  | 1.4 | 7.61E-02 |  |  |
| PDE6D     | 6.0  | 1.0 | 7.7  | 1.3 | 4.84E-03 | 6.4  | 1.1 | 3.50E-04 |  |  |
| ZKSCAN1   | 4.1  | 1.0 | 5.3  | 1.3 | 4.28E-02 | 5.1  | 1.2 | 2.19E-01 |  |  |
| ANP32A    | 19.9 | 1.0 | 25.8 | 1.3 | 2.00E-04 | 21.2 | 1.1 | 2.11E-03 |  |  |
| ZNF512B   | 3.0  | 1.0 | 3.9  | 1.3 | 4.49E-04 | 3.4  | 1.1 | 4.67E-03 |  |  |
| ALDH9A1   | 15.9 | 1.0 | 20.6 | 1.3 | 2.62E-04 | 17.6 | 1.1 | 4.76E-03 |  |  |
| PSMD10    | 5.1  | 1.0 | 6.6  | 1.3 | 3.44E-04 | 6.3  | 1.2 | 2.85E-02 |  |  |
| NSMCE1    | 9.6  | 1.0 | 12.4 | 1.3 | 6.82E-04 | 12.0 | 1.2 | 3.74E-03 |  |  |
| UBE2W     | 2.4  | 1.0 | 3.1  | 1.3 | 4.27E-03 | 3.3  | 1.4 | 1.57E-01 |  |  |
| FGGY      | 3.5  | 1.0 | 4.5  | 1.3 | 2.66E-02 | 4.1  | 1.2 | 2.70E-02 |  |  |
| CHD1L     | 2.6  | 1.0 | 3.3  | 1.3 | 2.07E-02 | 4.1  | 1.6 | 6.26E-01 |  |  |
| KIAA0226  | 2.7  | 1.0 | 3.5  | 1.3 | 4.91E-03 | 4.3  | 1.6 | 4.87E-01 |  |  |
| ARMCX3    | 6.8  | 1.0 | 8.8  | 1.3 | 4.64E-03 | 9.3  | 1.4 | 1.51E-01 |  |  |
| ZFYVE21   | 13.2 | 1.0 | 17.1 | 1.3 | 1.58E-04 | 17.2 | 1.3 | 4.47E-02 |  |  |
| MIER1     | 2.4  | 1.0 | 3.1  | 1.3 | 3.06E-02 | 3.9  | 1.6 | 5.51E-01 |  |  |
| SOBP      | 3.4  | 1.0 | 4.4  | 1.3 | 3.28E-02 | 3.7  | 1.1 | 3.36E-02 |  |  |
| MLL5      | 7.1  | 1.0 | 9.1  | 1.3 | 9.27E-03 | 10.3 | 1.5 | 1.72E-01 |  |  |
| HMGH4     | 6.0  | 1.0 | 7.7  | 1.3 | 1.02E-04 | 8.1  | 1.4 | 6.05E-02 |  |  |

|            |       |     |       |     |          |       |      |          |   |   |
|------------|-------|-----|-------|-----|----------|-------|------|----------|---|---|
| ZNF514     | 2.1   | 1.0 | 2.8   | 1.3 | 2.41E-02 | 2.9   | 1.3  | 1.05E-01 |   |   |
| AKAP13     | 35.1  | 1.0 | 45.3  | 1.3 | 9.25E-03 | 48.5  | 1.4  | 2.24E-01 |   |   |
| HNRNPC     | 40.5  | 1.0 | 52.2  | 1.3 | 2.96E-04 | 55.8  | 1.4  | 5.01E-02 |   |   |
| BACE1      | 4.0   | 1.0 | 5.1   | 1.3 | 6.88E-03 | 5.4   | 1.4  | 1.69E-01 |   |   |
| FBXW11     | 12.6  | 1.0 | 16.3  | 1.3 | 1.12E-03 | 17.8  | 1.4  | 5.99E-01 |   |   |
| GLOD4      | 6.6   | 1.0 | 8.5   | 1.3 | 2.63E-03 | 7.6   | 1.2  | 1.03E-02 |   |   |
| GRB10      | 6.5   | 1.0 | 8.4   | 1.3 | 3.88E-04 | 11.6  | 1.8  | 7.81E-01 |   |   |
| XPO7       | 8.7   | 1.0 | 11.3  | 1.3 | 6.30E-04 | 10.6  | 1.2  | 4.12E-03 |   |   |
| FUBP1      | 11.9  | 1.0 | 15.3  | 1.3 | 9.60E-05 | 15.7  | 1.3  | 7.78E-02 |   |   |
| LIMK2      | 2.8   | 1.0 | 3.6   | 1.3 | 4.35E-02 | 4.9   | 1.8  | 5.74E-01 |   |   |
| SOX17      | 2.1   | 1.0 | 2.7   | 1.3 | 3.01E-02 | 6.5   | 3.1  | 8.14E-01 |   |   |
| POLR2A     | 7.5   | 1.0 | 9.7   | 1.3 | 5.95E-04 | 11.1  | 1.5  | 3.64E-01 |   |   |
| C17orf28   | 2.6   | 1.0 | 3.4   | 1.3 | 4.81E-02 | 4.0   | 1.5  | 2.68E-01 |   |   |
| CTNNA3     | 3.1   | 1.0 | 3.9   | 1.3 | 3.59E-02 | 4.1   | 1.3  | 9.15E-01 |   |   |
| PTPN11     | 19.2  | 1.0 | 24.8  | 1.3 | 5.30E-03 | 26.5  | 1.4  | 9.78E-01 |   |   |
| C1orf97    | 4.1   | 1.0 | 5.3   | 1.3 | 2.49E-02 | 4.6   | 1.1  | 6.61E-02 |   |   |
| MAGI1      | 4.1   | 1.0 | 5.2   | 1.3 | 8.70E-03 | 6.0   | 1.5  | 5.55E-01 |   |   |
| TJP1       | 17.1  | 1.0 | 22.0  | 1.3 | 4.42E-04 | 22.7  | 1.3  | 1.04E-01 |   |   |
| PTRF       | 42.7  | 1.0 | 54.9  | 1.3 | 1.68E-03 | 55.1  | 1.3  | 1.50E-01 |   |   |
| USP20      | 2.8   | 1.0 | 3.5   | 1.3 | 1.91E-03 | 3.8   | 1.4  | 9.15E-02 |   |   |
| HMGB2      | 11.8  | 1.0 | 15.2  | 1.3 | 2.13E-02 | 18.4  | 1.6  | 4.23E-01 |   |   |
| EYA3       | 2.3   | 1.0 | 2.9   | 1.3 | 1.30E-03 | 3.1   | 1.3  | 2.30E-01 |   |   |
| TBL1X      | 2.2   | 1.0 | 2.8   | 1.3 | 1.67E-03 | 2.7   | 1.2  | 3.23E-02 |   |   |
| SEPT8      | 7.8   | 1.0 | 10.0  | 1.3 | 4.09E-04 | 8.5   | 1.1  | 1.34E-02 |   |   |
| FBXO21     | 8.8   | 1.0 | 11.3  | 1.3 | 1.49E-02 | 12.6  | 1.4  | 6.08E-01 |   |   |
| RDH11      | 4.6   | 1.0 | 5.9   | 1.3 | 1.92E-03 | 6.2   | 1.4  | 2.88E-01 |   |   |
| GATAD2B    | 3.0   | 1.0 | 3.9   | 1.3 | 6.49E-03 | 4.6   | 1.5  | 7.79E-01 |   |   |
| YWHAG      | 43.6  | 1.0 | 56.0  | 1.3 | 7.43E-04 | 73.8  | 1.7  | 2.86E-02 |   |   |
| SHISA5     | 11.3  | 1.0 | 14.5  | 1.3 | 4.25E-02 | 14.3  | 1.3  | 8.15E-02 |   |   |
| ISY1-RAB43 | 2.5   | 1.0 | 3.1   | 1.3 | 9.78E-03 | 3.0   | 1.2  | 6.07E-02 |   |   |
| ODF2       | 4.5   | 1.0 | 5.7   | 1.3 | 2.82E-02 | 6.0   | 1.3  | 1.10E-01 |   |   |
| EIF4G3     | 8.1   | 1.0 | 10.4  | 1.3 | 3.61E-03 | 10.5  | 1.3  | 2.65E-01 |   |   |
| C5orf32    | 26.0  | 1.0 | 33.4  | 1.3 | 1.73E-02 | 34.6  | 1.3  | 2.97E-01 |   |   |
| MEAF6      | 5.7   | 1.0 | 7.3   | 1.3 | 8.30E-05 | 9.0   | 1.6  | 9.20E-01 |   |   |
| FRY        | 10.0  | 1.0 | 12.9  | 1.3 | 4.04E-03 | 13.6  | 1.4  | 8.66E-01 |   |   |
| TOR1AIP1   | 10.0  | 1.0 | 12.8  | 1.3 | 1.75E-02 | 14.9  | 1.5  | 2.61E-01 |   |   |
| CSRNP2     | 4.1   | 1.0 | 5.2   | 1.3 | 2.77E-03 | 6.5   | 1.6  | 9.87E-01 |   |   |
| FAM178A    | 3.3   | 1.0 | 4.2   | 1.3 | 2.01E-02 | 3.8   | 1.2  | 9.21E-02 |   |   |
| INTS3      | 10.6  | 1.0 | 13.6  | 1.3 | 7.64E-03 | 15.2  | 1.4  | 1.37E-01 |   |   |
| FAM173B    | 1.7   | 1.0 | 2.1   | 1.3 | 4.37E-02 | 2.5   | 1.5  | 8.86E-01 |   |   |
| SRRM1      | 10.4  | 1.0 | 13.4  | 1.3 | 4.30E-03 | 14.4  | 1.4  | 7.69E-02 |   |   |
| FAM13A     | 3.1   | 1.0 | 3.9   | 1.3 | 4.94E-02 | 4.2   | 1.4  | 1.66E-01 |   |   |
| MGAT2      | 3.4   | 1.0 | 4.3   | 1.3 | 5.65E-03 | 5.1   | 1.5  | 4.91E-01 |   |   |
| C8orf76    | 3.2   | 1.0 | 4.2   | 1.3 | 4.16E-03 | 4.1   | 1.2  | 1.07E-02 |   |   |
| KIAA0141   | 10.9  | 1.0 | 14.0  | 1.3 | 2.76E-04 | 13.6  | 1.2  | 1.28E-02 |   |   |
| SCAF11     | 8.1   | 1.0 | 10.3  | 1.3 | 7.52E-03 | 10.5  | 1.3  | 1.95E-01 |   |   |
| C16orf45   | 19.2  | 1.0 | 24.6  | 1.3 | 7.37E-04 | 22.3  | 1.2  | 8.45E-02 |   |   |
| CREG1      | 23.7  | 1.0 | 30.4  | 1.3 | 1.53E-02 | 26.9  | 1.1  | 2.87E-03 |   |   |
| TBCA       | 39.0  | 1.0 | 50.0  | 1.3 | 1.06E-03 | 50.5  | 1.3  | 6.06E-02 |   |   |
| PLCG1      | 9.9   | 1.0 | 12.7  | 1.3 | 2.48E-03 | 16.2  | 1.6  | 4.17E-01 |   |   |
| ZSCAN21    | 1.8   | 1.0 | 2.3   | 1.3 | 4.08E-03 | 2.4   | 1.3  | 4.80E-01 |   |   |
| PTCD2      | 3.4   | 1.0 | 4.3   | 1.3 | 2.58E-02 | 3.4   | 1.0  | 6.54E-03 |   |   |
| SSH1       | 4.5   | 1.0 | 5.8   | 1.3 | 3.42E-03 | 5.7   | 1.3  | 1.40E-01 |   |   |
| OC10030695 | 5.1   | 1.0 | 6.6   | 1.3 | 2.20E-02 | 5.2   | 1.0  | 1.53E-05 |   |   |
| TNPO2      | 7.6   | 1.0 | 9.7   | 1.3 | 8.53E-05 | 9.5   | 1.2  | 7.52E-03 |   |   |
| ERCC2      | 2.5   | 1.0 | 3.2   | 1.3 | 1.87E-03 | 2.5   | -1.0 | 1.71E-03 |   |   |
| PDK1       | 6.2   | 1.0 | 7.9   | 1.3 | 4.33E-02 | 6.2   | -1.0 | 4.82E-02 |   |   |
| DIP2B      | 2.2   | 1.0 | 2.8   | 1.3 | 1.25E-02 | 3.1   | 1.4  | 2.13E-01 |   |   |
| FAM188A    | 3.1   | 1.0 | 3.9   | 1.3 | 5.92E-03 | 3.8   | 1.3  | 3.82E-02 |   |   |
| HSP90AA1   | 122.5 | 1.0 | 156.6 | 1.3 | 5.04E-04 | 176.5 | 1.4  | 9.30E-01 |   |   |
| DYNLT3     | 5.5   | 1.0 | 7.1   | 1.3 | 6.24E-03 | 6.9   | 1.2  | 7.81E-02 |   |   |
| CDC42EP3   | 12.5  | 1.0 | 16.0  | 1.3 | 1.66E-02 | 16.0  | 1.3  | 1.72E-02 |   |   |
| MFIGE8     | 127.8 | 1.0 | 163.4 | 1.3 | 1.17E-02 | 158.8 | 1.2  | 5.05E-01 |   |   |
| TMEM50A    | 12.9  | 1.0 | 16.5  | 1.3 | 1.16E-03 | 16.6  | 1.3  | 4.81E-02 |   |   |
| EIF4A2     | 130.3 | 1.0 | 166.5 | 1.3 | 1.09E-03 | 165.3 | 1.3  | 5.68E-02 |   |   |
| WWC3       | 8.1   | 1.0 | 10.3  | 1.3 | 5.55E-04 | 11.1  | 1.4  | 1.82E-01 |   |   |
| ARHGEF2    | 8.0   | 1.0 | 10.2  | 1.3 | 3.81E-02 | 9.9   | 1.2  | 1.05E-01 |   |   |
| PRCP       | 13.4  | 1.0 | 17.1  | 1.3 | 3.35E-02 | 14.5  | 1.1  | 1.76E-02 |   |   |
| LMAN2L     | 5.3   | 1.0 | 6.7   | 1.3 | 2.93E-03 | 6.5   | 1.2  | 9.85E-02 |   |   |
| NICN1      | 3.3   | 1.0 | 4.3   | 1.3 | 7.04E-03 | 4.0   | 1.2  | 4.87E-02 |   |   |
| GNPDA1     | 5.3   | 1.0 | 6.7   | 1.3 | 2.26E-02 | 6.0   | 1.1  | 2.47E-02 |   |   |
| SCAMP4     | 3.1   | 1.0 | 3.9   | 1.3 | 9.69E-03 | 3.5   | 1.2  | 3.95E-02 |   |   |
| ADAR       | 11.9  | 1.0 | 15.2  | 1.3 | 2.03E-02 | 15.2  | 1.3  | 1.11E-01 |   |   |
| SPRED2     | 4.5   | 1.0 | 5.8   | 1.3 | 1.96E-02 | 8.1   | 1.8  | 6.04E-01 |   |   |
| PCDH12     | 3.0   | 1.0 | 3.9   | 1.3 | 4.58E-02 | 3.7   | 1.2  | 1.22E-01 |   |   |
| ITGB5      | 19.0  | 1.0 | 24.2  | 1.3 | 3.06E-02 | 23.3  | 1.2  | 3.12E-01 |   |   |
| ZNF193     | 1.7   | 1.0 | 2.2   | 1.3 | 4.69E-02 | 2.6   | 1.5  | 4.35E-01 |   |   |
| RAB11B     | 37.0  | 1.0 | 47.2  | 1.3 | 8.30E-04 | 45.6  | 1.2  | 2.75E-02 |   |   |
| DOLK       | 2.6   | 1.0 | 3.3   | 1.3 | 6.88E-03 | 2.4   | -1.1 | 1.84E-03 | ∇ | ∇ |
| WDFY3      | 2.3   | 1.0 | 2.9   | 1.3 | 1.89E-02 | 2.9   | 1.3  | 5.35E-02 |   |   |
| BMPR2      | 4.2   | 1.0 | 5.4   | 1.3 | 1.19E-03 | 5.2   | 1.2  | 4.84E-02 |   |   |
| FHOD3      | 49.4  | 1.0 | 62.9  | 1.3 | 2.35E-02 | 60.5  | 1.2  | 5.69E-01 |   |   |
| MCL1       | 29.5  | 1.0 | 37.6  | 1.3 | 8.80E-03 | 92.4  | 3.1  | 7.93E-01 |   |   |
| ZNF830     | 2.8   | 1.0 | 3.6   | 1.3 | 1.74E-02 | 4.6   | 1.6  | 9.19E-01 |   |   |
| ZBTB4      | 14.7  | 1.0 | 18.7  | 1.3 | 1.13E-03 | 16.0  | 1.1  | 2.37E-03 |   |   |
| TMEM39B    | 1.7   | 1.0 | 2.1   | 1.3 | 8.05E-03 | 2.2   | 1.3  | 6.77E-02 |   |   |
| TOM1L2     | 38.3  | 1.0 | 48.7  | 1.3 | 4.80E-04 | 43.9  | 1.1  | 3.72E-02 |   |   |
| ZFP62      | 2.6   | 1.0 | 3.3   | 1.3 | 2.61E-02 | 2.6   | 1.0  | 5.63E-03 |   |   |

|           |       |     |       |     |          |       |      |          |  |  |
|-----------|-------|-----|-------|-----|----------|-------|------|----------|--|--|
| EIF1AX    | 8.7   | 1.0 | 11.1  | 1.3 | 2.71E-02 | 11.5  | 1.3  | 2.19E-01 |  |  |
| TMEM66    | 55.4  | 1.0 | 70.5  | 1.3 | 4.76E-04 | 69.7  | 1.3  | 1.20E-02 |  |  |
| LUZP6     | 7.3   | 1.0 | 9.2   | 1.3 | 1.04E-05 | 11.1  | 1.5  | 7.93E-01 |  |  |
| MTPN      | 7.3   | 1.0 | 9.2   | 1.3 | 1.04E-05 | 11.1  | 1.5  | 7.93E-01 |  |  |
| CLASP1    | 10.6  | 1.0 | 13.5  | 1.3 | 1.28E-03 | 13.6  | 1.3  | 1.49E-02 |  |  |
| RAB2B     | 2.9   | 1.0 | 3.7   | 1.3 | 3.46E-03 | 4.3   | 1.5  | 1.62E-01 |  |  |
| STX7      | 7.5   | 1.0 | 9.5   | 1.3 | 2.15E-03 | 8.7   | 1.2  | 1.46E-02 |  |  |
| APLP2     | 77.6  | 1.0 | 98.7  | 1.3 | 1.50E-02 | 96.9  | 1.2  | 1.02E-01 |  |  |
| GTF2B     | 3.9   | 1.0 | 4.9   | 1.3 | 2.03E-02 | 6.4   | 1.7  | 7.00E-01 |  |  |
| SLC25A6   | 64.2  | 1.0 | 81.7  | 1.3 | 3.03E-02 | 80.2  | 1.2  | 7.29E-02 |  |  |
| ATXN1L    | 3.6   | 1.0 | 4.6   | 1.3 | 6.60E-03 | 7.3   | 2.0  | 1.09E-01 |  |  |
| SIRT7     | 1.7   | 1.0 | 2.2   | 1.3 | 1.40E-02 | 2.6   | 1.5  | 3.24E-01 |  |  |
| GCC1      | 1.9   | 1.0 | 2.4   | 1.3 | 4.22E-03 | 2.6   | 1.4  | 2.06E-01 |  |  |
| FYN       | 8.8   | 1.0 | 11.2  | 1.3 | 3.09E-04 | 11.8  | 1.3  | 7.12E-02 |  |  |
| PDCD6     | 10.9  | 1.0 | 13.8  | 1.3 | 3.26E-03 | 13.2  | 1.2  | 1.32E-02 |  |  |
| UHRF2     | 3.1   | 1.0 | 3.9   | 1.3 | 5.27E-03 | 4.8   | 1.5  | 3.42E-01 |  |  |
| CDKN1B    | 11.5  | 1.0 | 14.6  | 1.3 | 8.09E-03 | 16.3  | 1.4  | 1.49E-01 |  |  |
| TCF12     | 6.5   | 1.0 | 8.2   | 1.3 | 1.19E-02 | 9.2   | 1.4  | 2.14E-01 |  |  |
| ATP9A     | 4.8   | 1.0 | 6.1   | 1.3 | 2.63E-02 | 5.9   | 1.2  | 1.20E-01 |  |  |
| CLTA      | 14.4  | 1.0 | 18.3  | 1.3 | 1.66E-02 | 18.3  | 1.3  | 5.65E-02 |  |  |
| PPP1R16B  | 2.0   | 1.0 | 2.6   | 1.3 | 4.04E-02 | 2.7   | 1.3  | 7.57E-02 |  |  |
| TRRAP     | 2.8   | 1.0 | 3.5   | 1.3 | 1.41E-03 | 3.5   | 1.3  | 5.81E-02 |  |  |
| LMO2      | 2.4   | 1.0 | 3.1   | 1.3 | 2.61E-02 | 2.8   | 1.1  | 4.74E-02 |  |  |
| SRSF9     | 6.2   | 1.0 | 7.8   | 1.3 | 2.10E-02 | 9.1   | 1.5  | 2.61E-01 |  |  |
| CEP57     | 4.8   | 1.0 | 6.1   | 1.3 | 4.82E-03 | 5.3   | 1.1  | 2.16E-02 |  |  |
| FAM120B   | 5.5   | 1.0 | 6.9   | 1.3 | 1.52E-03 | 6.9   | 1.3  | 3.33E-02 |  |  |
| KDM5C     | 5.2   | 1.0 | 6.6   | 1.3 | 2.41E-02 | 8.5   | 1.6  | 5.47E-01 |  |  |
| FAM120AOS | 2.8   | 1.0 | 3.5   | 1.3 | 7.27E-03 | 3.3   | 1.2  | 3.30E-02 |  |  |
| GABARAPL1 | 115.2 | 1.0 | 146.0 | 1.3 | 1.16E-02 | 157.6 | 1.4  | 3.55E-01 |  |  |
| FOXP1     | 3.4   | 1.0 | 4.3   | 1.3 | 4.89E-02 | 4.7   | 1.4  | 1.48E-01 |  |  |
| ETHE1     | 3.8   | 1.0 | 4.8   | 1.3 | 7.41E-03 | 3.9   | 1.0  | 1.82E-03 |  |  |
| EFNA5     | 2.2   | 1.0 | 2.7   | 1.3 | 2.32E-02 | 2.9   | 1.4  | 7.52E-01 |  |  |
| ALDH6A1   | 17.6  | 1.0 | 22.3  | 1.3 | 4.10E-02 | 17.8  | 1.0  | 3.61E-03 |  |  |
| DALRD3    | 2.6   | 1.0 | 3.3   | 1.3 | 1.94E-02 | 3.1   | 1.2  | 7.26E-02 |  |  |
| ZNF641    | 2.6   | 1.0 | 3.3   | 1.3 | 3.12E-02 | 3.3   | 1.3  | 1.84E-01 |  |  |
| PTP4A1    | 5.9   | 1.0 | 7.4   | 1.3 | 4.41E-02 | 10.1  | 1.7  | 6.59E-01 |  |  |
| PREPL     | 13.0  | 1.0 | 16.5  | 1.3 | 1.15E-03 | 16.5  | 1.3  | 2.93E-01 |  |  |
| MPDZ      | 10.4  | 1.0 | 13.2  | 1.3 | 1.17E-02 | 12.1  | 1.2  | 1.60E-01 |  |  |
| GOPC      | 7.0   | 1.0 | 8.9   | 1.3 | 1.18E-04 | 9.0   | 1.3  | 1.57E-02 |  |  |
| CREM      | 9.9   | 1.0 | 12.5  | 1.3 | 1.09E-02 | 13.9  | 1.4  | 1.73E-01 |  |  |
| THAP3     | 3.2   | 1.0 | 4.1   | 1.3 | 2.84E-02 | 3.8   | 1.2  | 1.30E-02 |  |  |
| BOD1L     | 2.8   | 1.0 | 3.5   | 1.3 | 5.39E-03 | 3.5   | 1.3  | 4.44E-02 |  |  |
| RBM26     | 4.1   | 1.0 | 5.2   | 1.3 | 6.38E-03 | 5.5   | 1.3  | 1.55E-01 |  |  |
| POFUT2    | 3.8   | 1.0 | 4.7   | 1.3 | 9.19E-04 | 5.3   | 1.4  | 1.53E-01 |  |  |
| B3GALNT1  | 8.8   | 1.0 | 11.2  | 1.3 | 3.73E-02 | 6.8   | -1.3 | 2.66E-03 |  |  |
| TXLNG     | 2.3   | 1.0 | 2.9   | 1.3 | 2.78E-02 | 3.6   | 1.6  | 2.68E-01 |  |  |
| TMEM8B    | 3.5   | 1.0 | 4.4   | 1.3 | 2.90E-03 | 4.0   | 1.1  | 8.51E-04 |  |  |
| ING4      | 6.2   | 1.0 | 7.8   | 1.3 | 2.38E-03 | 8.2   | 1.3  | 1.58E-01 |  |  |
| CDK14     | 2.6   | 1.0 | 3.3   | 1.3 | 1.15E-02 | 3.6   | 1.4  | 1.31E-01 |  |  |
| NDST2     | 2.6   | 1.0 | 3.3   | 1.3 | 9.76E-03 | 3.8   | 1.4  | 2.20E-01 |  |  |
| SOCS7     | 2.2   | 1.0 | 2.8   | 1.3 | 6.79E-03 | 3.0   | 1.4  | 4.65E-01 |  |  |
| HIP1      | 3.2   | 1.0 | 4.1   | 1.3 | 2.87E-03 | 4.5   | 1.4  | 2.05E-01 |  |  |
| TMEM138   | 2.8   | 1.0 | 3.5   | 1.3 | 1.95E-02 | 3.3   | 1.2  | 4.47E-02 |  |  |
| SLC2A11   | 2.4   | 1.0 | 3.0   | 1.3 | 3.13E-02 | 2.3   | -1.0 | 3.33E-02 |  |  |
| ZDHHC14   | 2.4   | 1.0 | 3.0   | 1.3 | 2.31E-03 | 4.0   | 1.7  | 2.06E-01 |  |  |
| FMR1      | 4.7   | 1.0 | 6.0   | 1.3 | 1.78E-02 | 6.4   | 1.4  | 1.73E-01 |  |  |
| CNOT6     | 1.9   | 1.0 | 2.5   | 1.3 | 1.18E-02 | 2.6   | 1.3  | 3.27E-01 |  |  |
| PDCD2L    | 2.5   | 1.0 | 3.1   | 1.3 | 9.71E-03 | 2.6   | 1.1  | 2.48E-03 |  |  |
| HDGFRP3   | 10.0  | 1.0 | 12.6  | 1.3 | 1.59E-04 | 13.7  | 1.4  | 1.83E-01 |  |  |
| ANXA7     | 33.3  | 1.0 | 41.9  | 1.3 | 2.33E-04 | 39.4  | 1.2  | 1.42E-03 |  |  |
| ARHGEF6   | 12.5  | 1.0 | 15.7  | 1.3 | 8.03E-03 | 13.9  | 1.1  | 3.11E-02 |  |  |
| ZNF84     | 2.1   | 1.0 | 2.6   | 1.3 | 8.79E-03 | 2.6   | 1.2  | 6.83E-02 |  |  |
| SRA1      | 6.5   | 1.0 | 8.2   | 1.3 | 4.03E-03 | 7.8   | 1.2  | 1.53E-02 |  |  |
| SAMD4B    | 6.3   | 1.0 | 8.0   | 1.3 | 3.45E-03 | 9.9   | 1.6  | 4.26E-01 |  |  |
| GALNTL4   | 5.3   | 1.0 | 6.7   | 1.3 | 6.09E-03 | 6.6   | 1.2  | 8.17E-02 |  |  |
| AFF4      | 4.9   | 1.0 | 6.1   | 1.3 | 3.76E-02 | 8.8   | 1.8  | 5.80E-01 |  |  |
| TDP2      | 7.5   | 1.0 | 9.4   | 1.3 | 1.20E-03 | 9.1   | 1.2  | 4.11E-02 |  |  |
| ALKBH6    | 2.4   | 1.0 | 3.0   | 1.3 | 1.80E-02 | 3.1   | 1.3  | 1.38E-01 |  |  |
| C7orf11   | 3.7   | 1.0 | 4.6   | 1.3 | 3.48E-02 | 4.7   | 1.3  | 3.52E-02 |  |  |
| ERBB2IP   | 4.5   | 1.0 | 5.7   | 1.3 | 9.43E-03 | 5.8   | 1.3  | 1.29E-01 |  |  |
| OBSCN     | 25.6  | 1.0 | 32.3  | 1.3 | 2.49E-02 | 46.9  | 1.8  | 9.90E-02 |  |  |
| SLK       | 8.8   | 1.0 | 11.1  | 1.3 | 2.36E-02 | 11.9  | 1.3  | 7.50E-01 |  |  |
| SPIRE1    | 7.8   | 1.0 | 9.8   | 1.3 | 2.58E-02 | 9.9   | 1.3  | 5.72E-01 |  |  |
| FBXO38    | 6.4   | 1.0 | 8.0   | 1.3 | 1.45E-03 | 8.3   | 1.3  | 2.17E-01 |  |  |
| RGL1      | 5.1   | 1.0 | 6.5   | 1.3 | 3.34E-02 | 6.8   | 1.3  | 1.52E-01 |  |  |
| PAAF1     | 3.4   | 1.0 | 4.3   | 1.3 | 2.50E-02 | 4.7   | 1.4  | 1.14E-01 |  |  |
| ZNF160    | 4.8   | 1.0 | 6.0   | 1.3 | 1.80E-02 | 6.4   | 1.3  | 1.28E-01 |  |  |
| TTC14     | 4.8   | 1.0 | 6.1   | 1.3 | 7.25E-03 | 7.0   | 1.4  | 3.07E-01 |  |  |
| PDDC1     | 2.6   | 1.0 | 3.2   | 1.3 | 1.24E-02 | 3.3   | 1.3  | 2.49E-01 |  |  |
| HELZ      | 2.0   | 1.0 | 2.5   | 1.3 | 1.80E-03 | 2.7   | 1.4  | 3.12E-01 |  |  |
| PURB      | 2.3   | 1.0 | 2.9   | 1.3 | 1.03E-02 | 3.5   | 1.5  | 9.53E-01 |  |  |
| CREBL2    | 5.6   | 1.0 | 7.0   | 1.3 | 1.01E-02 | 7.1   | 1.3  | 5.28E-02 |  |  |
| SPEN      | 4.8   | 1.0 | 6.1   | 1.3 | 6.80E-03 | 8.0   | 1.7  | 9.82E-01 |  |  |
| STXBP1    | 8.0   | 1.0 | 10.0  | 1.3 | 5.26E-03 | 9.2   | 1.2  | 2.47E-02 |  |  |
| ISG20L2   | 3.1   | 1.0 | 3.9   | 1.3 | 1.32E-02 | 5.1   | 1.6  | 6.74E-01 |  |  |
| HNRNP3    | 25.3  | 1.0 | 31.8  | 1.3 | 3.00E-03 | 38.0  | 1.5  | 5.50E-01 |  |  |
| SIAH2     | 4.2   | 1.0 | 5.3   | 1.3 | 7.91E-04 | 7.0   | 1.6  | 6.64E-01 |  |  |
| TMCC1     | 3.7   | 1.0 | 4.6   | 1.3 | 9.07E-05 | 4.7   | 1.3  | 4.32E-02 |  |  |

|          |       |     |       |     |          |       |      |          |   |   |
|----------|-------|-----|-------|-----|----------|-------|------|----------|---|---|
| SMG1     | 3.9   | 1.0 | 4.9   | 1.3 | 1.25E-02 | 6.2   | 1.6  | 6.76E-01 |   |   |
| PRR12    | 2.3   | 1.0 | 2.9   | 1.3 | 6.52E-03 | 2.5   | 1.1  | 1.40E-02 |   |   |
| TNIK     | 3.0   | 1.0 | 3.7   | 1.3 | 5.52E-03 | 4.2   | 1.4  | 4.50E-01 |   |   |
| CPT2     | 9.1   | 1.0 | 11.4  | 1.3 | 5.79E-03 | 10.4  | 1.1  | 4.29E-02 |   |   |
| NISCH    | 9.1   | 1.0 | 11.5  | 1.3 | 1.07E-02 | 13.1  | 1.4  | 1.89E-01 |   |   |
| BRD8     | 7.6   | 1.0 | 9.6   | 1.3 | 1.81E-03 | 12.1  | 1.6  | 8.94E-01 |   |   |
| TRIM26   | 3.9   | 1.0 | 4.9   | 1.3 | 2.65E-04 | 4.9   | 1.3  | 4.30E-02 |   |   |
| OTUD5    | 7.7   | 1.0 | 9.7   | 1.3 | 5.51E-03 | 11.3  | 1.5  | 2.42E-01 |   |   |
| CEP120   | 2.6   | 1.0 | 3.3   | 1.3 | 9.95E-03 | 3.6   | 1.4  | 1.74E-01 |   |   |
| DCLK2    | 3.6   | 1.0 | 4.5   | 1.3 | 3.77E-02 | 4.4   | 1.2  | 7.55E-01 |   |   |
| C12orf49 | 1.7   | 1.0 | 2.2   | 1.3 | 8.76E-03 | 2.3   | 1.3  | 1.20E-01 |   |   |
| PLOD3    | 6.6   | 1.0 | 8.2   | 1.3 | 3.28E-02 | 7.9   | 1.2  | 3.28E-02 |   |   |
| CHTOP    | 15.6  | 1.0 | 19.6  | 1.3 | 1.84E-03 | 20.0  | 1.3  | 9.10E-02 |   |   |
| RECQL5   | 1.9   | 1.0 | 2.3   | 1.3 | 1.38E-02 | 2.6   | 1.4  | 2.13E-01 |   |   |
| ATF1     | 2.9   | 1.0 | 3.7   | 1.3 | 3.28E-02 | 4.3   | 1.5  | 5.20E-01 |   |   |
| POLR3D   | 3.3   | 1.0 | 4.1   | 1.3 | 2.63E-02 | 4.9   | 1.5  | 3.04E-01 |   |   |
| C9orf125 | 10.8  | 1.0 | 13.6  | 1.3 | 2.09E-03 | 10.4  | -1.0 | 3.19E-03 |   |   |
| C11orf49 | 4.0   | 1.0 | 5.0   | 1.3 | 1.24E-03 | 4.2   | 1.0  | 3.36E-03 |   |   |
| PDCD7    | 2.6   | 1.0 | 3.2   | 1.3 | 8.22E-03 | 3.2   | 1.3  | 3.79E-02 |   |   |
| GCLC     | 4.3   | 1.0 | 5.4   | 1.3 | 9.84E-04 | 5.9   | 1.4  | 2.11E-01 |   |   |
| PELP1    | 4.8   | 1.0 | 6.0   | 1.3 | 6.00E-03 | 6.2   | 1.3  | 1.06E-01 |   |   |
| CLK2     | 6.1   | 1.0 | 7.6   | 1.3 | 6.25E-03 | 8.2   | 1.3  | 1.10E-01 |   |   |
| KIAA1370 | 5.5   | 1.0 | 6.9   | 1.3 | 3.16E-02 | 11.0  | 2.0  | 2.06E-01 |   |   |
| ATP6V1C1 | 3.9   | 1.0 | 4.9   | 1.3 | 8.33E-05 | 5.2   | 1.3  | 3.38E-02 |   |   |
| CAND1    | 3.4   | 1.0 | 4.2   | 1.3 | 2.31E-02 | 5.0   | 1.5  | 2.75E-01 |   |   |
| CSNK2A2  | 6.7   | 1.0 | 8.4   | 1.3 | 1.29E-02 | 9.3   | 1.4  | 2.31E-01 |   |   |
| PDXP     | 5.2   | 1.0 | 6.5   | 1.3 | 3.36E-03 | 5.4   | 1.0  | 1.11E-03 |   |   |
| CAMK2B   | 18.1  | 1.0 | 22.6  | 1.3 | 8.99E-03 | 24.9  | 1.4  | 3.99E-01 |   |   |
| PLEKHB2  | 8.3   | 1.0 | 10.4  | 1.3 | 1.49E-03 | 10.4  | 1.2  | 2.95E-02 |   |   |
| SGSM2    | 6.4   | 1.0 | 8.0   | 1.3 | 2.17E-03 | 8.0   | 1.2  | 3.44E-02 |   |   |
| POLDIP3  | 8.6   | 1.0 | 10.7  | 1.3 | 3.08E-04 | 11.4  | 1.3  | 8.10E-02 |   |   |
| DHX8     | 3.6   | 1.0 | 4.6   | 1.3 | 1.77E-02 | 5.0   | 1.4  | 3.40E-01 |   |   |
| BBS10    | 2.7   | 1.0 | 3.4   | 1.3 | 4.16E-02 | 4.1   | 1.5  | 8.78E-01 |   |   |
| INO80E   | 6.7   | 1.0 | 8.4   | 1.3 | 6.35E-03 | 8.2   | 1.2  | 2.66E-02 |   |   |
| ANAPC4   | 3.6   | 1.0 | 4.5   | 1.2 | 3.69E-02 | 4.2   | 1.2  | 4.85E-02 |   |   |
| TFCP2    | 4.8   | 1.0 | 5.9   | 1.2 | 4.93E-07 | 5.7   | 1.2  | 2.26E-03 |   |   |
| CEP68    | 4.7   | 1.0 | 5.9   | 1.2 | 9.48E-04 | 5.5   | 1.2  | 6.17E-03 |   |   |
| UBTF     | 7.8   | 1.0 | 9.8   | 1.2 | 6.16E-03 | 9.1   | 1.2  | 2.33E-02 |   |   |
| NCAPD2   | 2.5   | 1.0 | 3.1   | 1.2 | 2.26E-02 | 3.2   | 1.3  | 1.36E-01 |   |   |
| EP400    | 2.7   | 1.0 | 3.4   | 1.2 | 1.21E-03 | 3.8   | 1.4  | 2.00E-01 |   |   |
| GPN2     | 3.9   | 1.0 | 4.8   | 1.2 | 2.43E-02 | 5.2   | 1.4  | 4.92E-01 |   |   |
| AGPAT1   | 15.0  | 1.0 | 18.8  | 1.2 | 1.34E-04 | 17.4  | 1.2  | 5.00E-03 |   |   |
| EED      | 2.2   | 1.0 | 2.8   | 1.2 | 6.65E-03 | 3.3   | 1.5  | 3.50E-01 |   |   |
| HUWE1    | 13.4  | 1.0 | 16.8  | 1.2 | 7.93E-04 | 16.3  | 1.2  | 2.35E-02 |   |   |
| WDR48    | 5.7   | 1.0 | 7.1   | 1.2 | 9.47E-05 | 7.2   | 1.3  | 2.19E-02 |   |   |
| ALG13    | 3.9   | 1.0 | 4.8   | 1.2 | 4.62E-03 | 5.0   | 1.3  | 6.74E-02 |   |   |
| INTS1    | 6.3   | 1.0 | 7.9   | 1.2 | 4.38E-03 | 8.9   | 1.4  | 1.89E-01 |   |   |
| PARN     | 5.6   | 1.0 | 7.0   | 1.2 | 2.39E-04 | 6.6   | 1.2  | 9.30E-03 |   |   |
| RABGGTB  | 14.1  | 1.0 | 17.6  | 1.2 | 8.05E-03 | 18.8  | 1.3  | 7.42E-01 |   |   |
| FECH     | 3.3   | 1.0 | 4.2   | 1.2 | 2.40E-03 | 3.7   | 1.1  | 4.24E-03 |   |   |
| DARS2    | 3.7   | 1.0 | 4.7   | 1.2 | 2.94E-02 | 3.9   | 1.0  | 7.33E-02 |   |   |
| NUDT21   | 7.3   | 1.0 | 9.1   | 1.2 | 4.09E-03 | 9.2   | 1.3  | 7.56E-02 |   |   |
| GLB1     | 4.3   | 1.0 | 5.3   | 1.2 | 1.45E-02 | 5.1   | 1.2  | 3.38E-02 |   |   |
| ARMCX6   | 7.9   | 1.0 | 9.9   | 1.2 | 3.22E-02 | 7.2   | -1.1 | 2.39E-03 | √ | √ |
| MAN1B1   | 6.4   | 1.0 | 8.0   | 1.2 | 1.10E-03 | 7.7   | 1.2  | 1.31E-02 |   |   |
| CCNL2    | 19.7  | 1.0 | 24.6  | 1.2 | 3.34E-02 | 27.3  | 1.4  | 1.51E-01 |   |   |
| SMARCC1  | 3.9   | 1.0 | 4.8   | 1.2 | 1.59E-02 | 5.9   | 1.5  | 4.83E-01 |   |   |
| SUPT16H  | 8.7   | 1.0 | 10.8  | 1.2 | 1.10E-03 | 11.3  | 1.3  | 7.12E-02 |   |   |
| ZC3H4    | 2.6   | 1.0 | 3.2   | 1.2 | 1.68E-03 | 3.8   | 1.5  | 5.94E-01 |   |   |
| ARSA     | 3.3   | 1.0 | 4.1   | 1.2 | 2.94E-02 | 4.1   | 1.2  | 7.06E-02 |   |   |
| HDAC2    | 2.8   | 1.0 | 3.4   | 1.2 | 9.26E-04 | 3.5   | 1.3  | 1.50E-02 |   |   |
| HSPA4    | 20.0  | 1.0 | 24.9  | 1.2 | 2.41E-03 | 29.8  | 1.5  | 3.93E-01 |   |   |
| HSPC159  | 2.1   | 1.0 | 2.6   | 1.2 | 4.23E-02 | 2.1   | -1.0 | 1.12E-02 |   |   |
| FBXO9    | 5.9   | 1.0 | 7.4   | 1.2 | 1.10E-02 | 6.7   | 1.1  | 2.36E-02 |   |   |
| ZNF224   | 3.8   | 1.0 | 4.7   | 1.2 | 1.61E-02 | 5.1   | 1.3  | 1.50E-01 |   |   |
| SMAD2    | 2.9   | 1.0 | 3.6   | 1.2 | 1.31E-03 | 3.5   | 1.2  | 4.07E-02 |   |   |
| PIAS2    | 3.2   | 1.0 | 4.0   | 1.2 | 1.78E-02 | 3.9   | 1.2  | 1.08E-01 |   |   |
| SERINC3  | 25.4  | 1.0 | 31.6  | 1.2 | 4.05E-03 | 34.8  | 1.4  | 1.10E-01 |   |   |
| NACA     | 122.3 | 1.0 | 152.2 | 1.2 | 4.72E-03 | 157.9 | 1.3  | 5.74E-02 |   |   |
| ZNF384   | 5.3   | 1.0 | 6.6   | 1.2 | 2.14E-02 | 7.3   | 1.4  | 1.87E-01 |   |   |
| MACF1    | 12.9  | 1.0 | 16.0  | 1.2 | 6.90E-05 | 16.1  | 1.3  | 1.67E-01 |   |   |
| USP5     | 10.6  | 1.0 | 13.2  | 1.2 | 1.45E-04 | 12.2  | 1.2  | 2.37E-02 |   |   |
| TP53BP2  | 4.6   | 1.0 | 5.7   | 1.2 | 4.66E-02 | 6.4   | 1.4  | 4.60E-01 |   |   |
| NUB1     | 10.1  | 1.0 | 12.6  | 1.2 | 3.97E-04 | 12.2  | 1.2  | 1.19E-02 |   |   |
| CCPG1    | 19.6  | 1.0 | 24.3  | 1.2 | 3.74E-04 | 21.7  | 1.1  | 6.94E-03 |   |   |
| SLC35A1  | 4.0   | 1.0 | 4.9   | 1.2 | 3.16E-02 | 4.8   | 1.2  | 2.80E-02 |   |   |
| C16orf48 | 2.9   | 1.0 | 3.6   | 1.2 | 3.71E-02 | 3.7   | 1.3  | 7.79E-02 |   |   |
| PSMG2    | 10.4  | 1.0 | 12.9  | 1.2 | 6.70E-03 | 12.4  | 1.2  | 2.80E-02 |   |   |
| HMGCR    | 1.8   | 1.0 | 2.2   | 1.2 | 3.62E-02 | 2.8   | 1.6  | 7.44E-01 |   |   |
| STX6     | 1.9   | 1.0 | 2.3   | 1.2 | 3.58E-02 | 2.8   | 1.5  | 4.22E-01 |   |   |
| USP12    | 4.4   | 1.0 | 5.5   | 1.2 | 1.20E-02 | 6.7   | 1.5  | 5.19E-01 |   |   |
| RABGAP1  | 9.9   | 1.0 | 12.3  | 1.2 | 1.11E-04 | 13.3  | 1.3  | 1.49E-01 |   |   |
| PLEKHA3  | 6.0   | 1.0 | 7.5   | 1.2 | 1.21E-03 | 7.8   | 1.3  | 1.58E-01 |   |   |
| HDAC7    | 9.3   | 1.0 | 11.5  | 1.2 | 4.18E-02 | 14.0  | 1.5  | 4.73E-01 |   |   |
| HSPD1    | 42.6  | 1.0 | 52.9  | 1.2 | 4.72E-04 | 54.5  | 1.3  | 3.37E-02 |   |   |
| PITPNB   | 9.2   | 1.0 | 11.5  | 1.2 | 6.66E-03 | 16.5  | 1.8  | 7.79E-01 |   |   |
| TERF2    | 3.3   | 1.0 | 4.1   | 1.2 | 7.94E-03 | 4.4   | 1.3  | 1.21E-01 |   |   |
| KIAA1468 | 2.6   | 1.0 | 3.3   | 1.2 | 3.03E-03 | 3.4   | 1.3  | 1.27E-01 |   |   |

|           |       |     |       |     |          |       |      |          |   |   |
|-----------|-------|-----|-------|-----|----------|-------|------|----------|---|---|
| MLXIP     | 6.2   | 1.0 | 7.8   | 1.2 | 1.27E-02 | 9.0   | 1.4  | 5.16E-01 |   |   |
| OMA1      | 6.9   | 1.0 | 8.6   | 1.2 | 2.65E-02 | 7.3   | 1.1  | 1.14E-02 |   |   |
| NPRL3     | 4.5   | 1.0 | 5.6   | 1.2 | 1.99E-04 | 5.6   | 1.2  | 3.52E-02 |   |   |
| PRKCSH    | 18.8  | 1.0 | 23.4  | 1.2 | 3.38E-03 | 22.3  | 1.2  | 2.41E-02 |   |   |
| SPAG16    | 4.6   | 1.0 | 5.8   | 1.2 | 3.23E-02 | 5.2   | 1.1  | 4.64E-02 |   |   |
| TMEM181   | 2.5   | 1.0 | 3.1   | 1.2 | 2.18E-02 | 3.9   | 1.5  | 4.85E-01 |   |   |
| CSNK1E    | 16.2  | 1.0 | 20.1  | 1.2 | 1.03E-03 | 21.8  | 1.3  | 5.21E-02 |   |   |
| ZNF496    | 3.0   | 1.0 | 3.7   | 1.2 | 2.59E-02 | 4.1   | 1.4  | 1.59E-01 |   |   |
| STAT5B    | 7.6   | 1.0 | 9.5   | 1.2 | 1.19E-02 | 10.6  | 1.4  | 1.66E-01 |   |   |
| DUSP26    | 24.9  | 1.0 | 30.9  | 1.2 | 2.19E-02 | 24.4  | -1.0 | 2.76E-02 |   |   |
| TRAF2     | 1.7   | 1.0 | 2.1   | 1.2 | 3.00E-02 | 2.1   | 1.2  | 7.78E-02 |   |   |
| C14orf43  | 2.9   | 1.0 | 3.6   | 1.2 | 4.07E-02 | 4.6   | 1.6  | 6.35E-01 |   |   |
| CDH2      | 69.9  | 1.0 | 86.7  | 1.2 | 8.19E-03 | 83.9  | 1.2  | 7.22E-01 |   |   |
| UBFD1     | 6.9   | 1.0 | 8.5   | 1.2 | 2.63E-03 | 8.8   | 1.3  | 7.35E-01 |   |   |
| PAK4      | 2.8   | 1.0 | 3.4   | 1.2 | 8.89E-04 | 3.4   | 1.2  | 1.37E-01 |   |   |
| HPS4      | 2.3   | 1.0 | 2.8   | 1.2 | 3.32E-02 | 2.7   | 1.2  | 7.77E-02 |   |   |
| PAPD4     | 5.1   | 1.0 | 6.3   | 1.2 | 3.81E-02 | 6.7   | 1.3  | 1.41E-01 |   |   |
| BLOC1S2   | 4.0   | 1.0 | 4.9   | 1.2 | 3.55E-02 | 5.6   | 1.4  | 3.26E-01 |   |   |
| C17orf103 | 3.6   | 1.0 | 4.5   | 1.2 | 7.14E-03 | 4.2   | 1.2  | 1.16E-01 |   |   |
| FZR1      | 4.1   | 1.0 | 5.1   | 1.2 | 5.30E-03 | 5.5   | 1.3  | 1.31E-01 |   |   |
| RASAL2    | 4.5   | 1.0 | 5.5   | 1.2 | 3.68E-02 | 8.4   | 1.9  | 2.57E-01 |   |   |
| EXOC1     | 6.2   | 1.0 | 7.7   | 1.2 | 1.49E-03 | 7.6   | 1.2  | 1.13E-02 |   |   |
| DVL2      | 3.1   | 1.0 | 3.9   | 1.2 | 6.50E-03 | 3.9   | 1.2  | 1.74E-02 |   |   |
| TRAPP4    | 8.6   | 1.0 | 10.6  | 1.2 | 4.44E-03 | 9.6   | 1.1  | 1.91E-03 |   |   |
| SCO1      | 10.9  | 1.0 | 13.5  | 1.2 | 2.70E-03 | 11.2  | 1.0  | 1.71E-02 |   |   |
| SUDS3     | 4.7   | 1.0 | 5.8   | 1.2 | 7.87E-04 | 6.1   | 1.3  | 1.68E-02 |   |   |
| MAP3K7    | 7.3   | 1.0 | 9.0   | 1.2 | 1.22E-03 | 9.6   | 1.3  | 4.11E-01 |   |   |
| UBE2Z     | 10.0  | 1.0 | 12.3  | 1.2 | 9.20E-04 | 13.9  | 1.4  | 1.79E-01 |   |   |
| USP19     | 8.1   | 1.0 | 10.1  | 1.2 | 2.27E-04 | 9.7   | 1.2  | 1.32E-02 |   |   |
| NPTXR     | 3.0   | 1.0 | 3.7   | 1.2 | 3.07E-02 | 2.8   | -1.1 | 3.45E-03 | v | v |
| C10orf76  | 10.1  | 1.0 | 12.5  | 1.2 | 1.11E-02 | 12.9  | 1.3  | 3.04E-01 |   |   |
| EPC2      | 5.3   | 1.0 | 6.6   | 1.2 | 3.98E-03 | 7.9   | 1.5  | 6.10E-01 |   |   |
| CBX1      | 9.0   | 1.0 | 11.2  | 1.2 | 7.87E-04 | 11.7  | 1.3  | 2.12E-01 |   |   |
| MNAT1     | 4.8   | 1.0 | 5.9   | 1.2 | 9.00E-03 | 5.9   | 1.2  | 7.48E-02 |   |   |
| HBP1      | 16.5  | 1.0 | 20.4  | 1.2 | 3.37E-02 | 24.8  | 1.5  | 3.97E-01 |   |   |
| UTP3      | 4.6   | 1.0 | 5.7   | 1.2 | 5.46E-03 | 6.3   | 1.4  | 4.73E-01 |   |   |
| PIGQ      | 3.7   | 1.0 | 4.6   | 1.2 | 1.59E-02 | 4.6   | 1.2  | 1.16E-01 |   |   |
| OS9       | 29.0  | 1.0 | 35.9  | 1.2 | 3.49E-03 | 34.2  | 1.2  | 1.71E-02 |   |   |
| KIAA0355  | 4.2   | 1.0 | 5.2   | 1.2 | 2.74E-02 | 6.1   | 1.5  | 2.16E-01 |   |   |
| CCDC90B   | 6.5   | 1.0 | 8.0   | 1.2 | 2.39E-03 | 7.6   | 1.2  | 6.35E-02 |   |   |
| GALNT11   | 7.8   | 1.0 | 9.7   | 1.2 | 4.93E-03 | 9.3   | 1.2  | 2.57E-02 |   |   |
| PSIP1     | 10.3  | 1.0 | 12.7  | 1.2 | 2.60E-02 | 11.6  | 1.1  | 3.05E-02 |   |   |
| SBDS      | 77.1  | 1.0 | 95.3  | 1.2 | 6.48E-03 | 101.7 | 1.3  | 3.61E-01 |   |   |
| TBL1XR1   | 7.3   | 1.0 | 9.1   | 1.2 | 1.96E-02 | 8.6   | 1.2  | 9.10E-02 |   |   |
| MLL2      | 4.5   | 1.0 | 5.5   | 1.2 | 6.15E-03 | 6.4   | 1.4  | 3.99E-01 |   |   |
| CTSD      | 170.1 | 1.0 | 210.2 | 1.2 | 3.29E-02 | 167.6 | -1.0 | 3.99E-03 |   |   |
| RNF219    | 2.6   | 1.0 | 3.2   | 1.2 | 9.63E-03 | 2.8   | 1.1  | 3.34E-02 |   |   |
| UBR4      | 8.3   | 1.0 | 10.2  | 1.2 | 3.53E-03 | 10.6  | 1.3  | 3.54E-01 |   |   |
| ARHGEF3   | 3.8   | 1.0 | 4.7   | 1.2 | 4.75E-03 | 4.2   | 1.1  | 2.80E-02 |   |   |
| TAPBP     | 8.9   | 1.0 | 11.0  | 1.2 | 7.70E-03 | 9.7   | 1.1  | 6.93E-03 |   |   |
| YLPM1     | 4.7   | 1.0 | 5.8   | 1.2 | 1.69E-03 | 6.2   | 1.3  | 8.56E-02 |   |   |
| HINFP     | 2.2   | 1.0 | 2.7   | 1.2 | 2.30E-02 | 3.0   | 1.4  | 2.16E-01 |   |   |
| BTBD10    | 4.8   | 1.0 | 6.0   | 1.2 | 5.89E-04 | 6.9   | 1.4  | 5.73E-01 |   |   |
| APTX      | 3.6   | 1.0 | 4.4   | 1.2 | 1.79E-03 | 4.5   | 1.3  | 8.01E-02 |   |   |
| FAM122B   | 4.2   | 1.0 | 5.2   | 1.2 | 1.06E-03 | 5.7   | 1.4  | 1.73E-01 |   |   |
| SSR4      | 32.0  | 1.0 | 39.6  | 1.2 | 3.25E-02 | 34.4  | 1.1  | 1.17E-02 |   |   |
| MEX3C     | 3.1   | 1.0 | 3.8   | 1.2 | 3.76E-02 | 5.2   | 1.7  | 6.08E-01 |   |   |
| PLAGL2    | 2.4   | 1.0 | 3.0   | 1.2 | 2.48E-02 | 4.2   | 1.7  | 3.36E-01 |   |   |
| UNC50     | 7.8   | 1.0 | 9.6   | 1.2 | 7.51E-04 | 9.6   | 1.2  | 1.58E-02 |   |   |
| HIRA      | 4.2   | 1.0 | 5.1   | 1.2 | 3.05E-03 | 6.3   | 1.5  | 8.34E-01 |   |   |
| PLXNB2    | 9.0   | 1.0 | 11.1  | 1.2 | 3.78E-02 | 11.5  | 1.3  | 1.96E-01 |   |   |
| SYF2      | 12.7  | 1.0 | 15.6  | 1.2 | 1.66E-02 | 15.5  | 1.2  | 3.74E-02 |   |   |
| RXR8      | 7.4   | 1.0 | 9.1   | 1.2 | 4.86E-03 | 9.3   | 1.3  | 7.98E-02 |   |   |
| GLT8D1    | 7.8   | 1.0 | 9.7   | 1.2 | 1.21E-02 | 8.5   | 1.1  | 2.44E-02 |   |   |
| PEAK1     | 7.1   | 1.0 | 8.7   | 1.2 | 4.50E-02 | 8.8   | 1.2  | 3.46E-01 |   |   |
| SPTAN1    | 31.4  | 1.0 | 38.6  | 1.2 | 7.95E-03 | 29.7  | -1.1 | 2.45E-03 |   |   |
| NBPF11    | 2.0   | 1.0 | 2.5   | 1.2 | 3.31E-02 | 2.7   | 1.3  | 1.55E-01 |   |   |
| XAB2      | 6.1   | 1.0 | 7.6   | 1.2 | 8.97E-04 | 7.8   | 1.3  | 4.77E-02 |   |   |
| TDRD7     | 2.2   | 1.0 | 2.8   | 1.2 | 1.32E-03 | 2.6   | 1.1  | 2.74E-03 |   |   |
| GRINA     | 21.8  | 1.0 | 26.8  | 1.2 | 1.15E-02 | 27.3  | 1.3  | 6.49E-02 |   |   |
| SMARCA2   | 11.4  | 1.0 | 14.1  | 1.2 | 3.40E-03 | 14.8  | 1.3  | 7.11E-02 |   |   |
| IKBKAP    | 6.3   | 1.0 | 7.8   | 1.2 | 1.05E-02 | 7.1   | 1.1  | 2.42E-02 |   |   |
| FBXO30    | 4.4   | 1.0 | 5.4   | 1.2 | 2.92E-02 | 6.1   | 1.4  | 8.69E-01 |   |   |
| NAA35     | 3.9   | 1.0 | 4.8   | 1.2 | 7.17E-04 | 4.6   | 1.2  | 7.96E-02 |   |   |
| CAPRIN1   | 19.5  | 1.0 | 24.0  | 1.2 | 6.00E-03 | 22.1  | 1.1  | 2.25E-02 |   |   |
| ANP32E    | 6.8   | 1.0 | 8.3   | 1.2 | 3.50E-02 | 7.2   | 1.1  | 6.07E-03 |   |   |
| MSL2      | 2.8   | 1.0 | 3.4   | 1.2 | 1.01E-02 | 4.1   | 1.5  | 5.40E-01 |   |   |
| MAPRE1    | 15.4  | 1.0 | 18.9  | 1.2 | 1.03E-04 | 23.6  | 1.5  | 8.86E-01 |   |   |
| TP53      | 1.7   | 1.0 | 2.1   | 1.2 | 2.55E-02 | 2.4   | 1.4  | 2.44E-01 |   |   |
| PLDN      | 3.1   | 1.0 | 3.8   | 1.2 | 4.72E-02 | 4.0   | 1.3  | 1.26E-01 |   |   |
| RBMS2     | 3.7   | 1.0 | 4.6   | 1.2 | 2.48E-03 | 5.1   | 1.4  | 1.37E-01 |   |   |
| PAM       | 126.8 | 1.0 | 156.0 | 1.2 | 7.36E-03 | 134.2 | 1.1  | 8.04E-02 |   |   |
| SMG5      | 19.2  | 1.0 | 23.7  | 1.2 | 1.72E-02 | 25.2  | 1.3  | 6.24E-01 |   |   |
| SLC30A5   | 5.2   | 1.0 | 6.4   | 1.2 | 2.64E-02 | 6.4   | 1.2  | 2.30E-01 |   |   |
| ELMOD2    | 2.5   | 1.0 | 3.0   | 1.2 | 4.26E-02 | 2.7   | 1.1  | 5.27E-02 |   |   |
| LAMP1     | 28.5  | 1.0 | 35.0  | 1.2 | 2.08E-03 | 34.6  | 1.2  | 4.02E-02 |   |   |
| NRBP2     | 4.8   | 1.0 | 5.8   | 1.2 | 1.27E-02 | 5.8   | 1.2  | 3.21E-02 |   |   |
| ARGLU1    | 17.8  | 1.0 | 21.9  | 1.2 | 4.46E-02 | 26.3  | 1.5  | 3.15E-01 |   |   |

|           |       |     |       |     |          |       |      |          |  |  |
|-----------|-------|-----|-------|-----|----------|-------|------|----------|--|--|
| TBCEL     | 2.7   | 1.0 | 3.3   | 1.2 | 6.96E-03 | 3.7   | 1.4  | 8.45E-01 |  |  |
| KHDRBS1   | 17.2  | 1.0 | 21.1  | 1.2 | 3.85E-04 | 20.7  | 1.2  | 1.36E-02 |  |  |
| HGS       | 10.1  | 1.0 | 12.4  | 1.2 | 6.05E-03 | 13.6  | 1.3  | 7.89E-02 |  |  |
| TSPYL4    | 8.2   | 1.0 | 10.1  | 1.2 | 6.84E-03 | 10.3  | 1.3  | 5.09E-01 |  |  |
| HPRT1     | 6.6   | 1.0 | 8.1   | 1.2 | 9.68E-04 | 7.3   | 1.1  | 2.88E-03 |  |  |
| COMMD8    | 4.4   | 1.0 | 5.4   | 1.2 | 2.86E-02 | 4.4   | 1.0  | 8.74E-02 |  |  |
| USP9X     | 6.7   | 1.0 | 8.3   | 1.2 | 6.16E-03 | 7.5   | 1.1  | 1.24E-02 |  |  |
| TSPAN3    | 14.8  | 1.0 | 18.2  | 1.2 | 2.55E-02 | 19.7  | 1.3  | 5.30E-01 |  |  |
| RAB8A     | 4.2   | 1.0 | 5.2   | 1.2 | 4.85E-02 | 6.4   | 1.5  | 2.59E-01 |  |  |
| CLTCL1    | 1.7   | 1.0 | 2.1   | 1.2 | 2.96E-02 | 2.7   | 1.5  | 6.18E-01 |  |  |
| SPTLC1    | 6.6   | 1.0 | 8.0   | 1.2 | 1.40E-02 | 9.2   | 1.4  | 3.09E-01 |  |  |
| KRI1      | 3.2   | 1.0 | 3.9   | 1.2 | 4.92E-03 | 4.1   | 1.3  | 1.01E-01 |  |  |
| MED28     | 4.7   | 1.0 | 5.8   | 1.2 | 2.10E-02 | 7.2   | 1.5  | 3.25E-01 |  |  |
| FOXJ3     | 6.8   | 1.0 | 8.3   | 1.2 | 2.25E-03 | 7.9   | 1.2  | 7.92E-03 |  |  |
| TMEM185B  | 4.8   | 1.0 | 5.9   | 1.2 | 1.23E-02 | 6.6   | 1.4  | 5.23E-01 |  |  |
| MED12     | 3.5   | 1.0 | 4.2   | 1.2 | 8.33E-03 | 4.6   | 1.3  | 1.36E-01 |  |  |
| SYNPO     | 122.6 | 1.0 | 150.3 | 1.2 | 1.49E-02 | 120.4 | -1.0 | 1.52E-01 |  |  |
| RBM24     | 44.3  | 1.0 | 54.3  | 1.2 | 4.12E-02 | 44.2  | -1.0 | 6.16E-02 |  |  |
| PLD3      | 28.9  | 1.0 | 35.5  | 1.2 | 4.43E-02 | 33.9  | 1.2  | 1.77E-02 |  |  |
| RAB11FIP5 | 4.3   | 1.0 | 5.3   | 1.2 | 6.31E-03 | 6.6   | 1.5  | 9.25E-01 |  |  |
| UBE2E2    | 6.5   | 1.0 | 8.0   | 1.2 | 6.91E-03 | 7.3   | 1.1  | 7.66E-03 |  |  |
| JOSD1     | 5.8   | 1.0 | 7.2   | 1.2 | 4.52E-02 | 11.1  | 1.9  | 5.37E-01 |  |  |
| TAX1BP3   | 36.9  | 1.0 | 45.3  | 1.2 | 2.55E-02 | 46.6  | 1.3  | 6.59E-01 |  |  |
| ARMCX1    | 8.5   | 1.0 | 10.5  | 1.2 | 2.47E-03 | 10.3  | 1.2  | 7.71E-03 |  |  |
| C15orf44  | 4.0   | 1.0 | 4.9   | 1.2 | 1.76E-03 | 4.8   | 1.2  | 1.11E-02 |  |  |
| ZFP106    | 69.0  | 1.0 | 84.5  | 1.2 | 3.25E-02 | 74.5  | 1.1  | 2.64E-01 |  |  |
| POLR2G    | 11.7  | 1.0 | 14.3  | 1.2 | 1.55E-02 | 12.8  | 1.1  | 1.06E-02 |  |  |
| HERC1     | 6.1   | 1.0 | 7.5   | 1.2 | 1.66E-02 | 6.1   | -1.0 | 7.33E-03 |  |  |
| THUMPDI   | 2.1   | 1.0 | 2.5   | 1.2 | 2.55E-02 | 2.9   | 1.4  | 6.22E-01 |  |  |
| KDM3B     | 7.6   | 1.0 | 9.3   | 1.2 | 4.63E-04 | 9.5   | 1.2  | 2.95E-02 |  |  |
| TCF3      | 2.5   | 1.0 | 3.1   | 1.2 | 3.87E-02 | 3.5   | 1.4  | 2.04E-01 |  |  |
| NCAPH2    | 5.4   | 1.0 | 6.6   | 1.2 | 3.88E-02 | 7.4   | 1.4  | 3.08E-01 |  |  |
| C1orf50   | 3.7   | 1.0 | 4.6   | 1.2 | 9.00E-03 | 4.5   | 1.2  | 5.99E-02 |  |  |
| SUGT1     | 7.0   | 1.0 | 8.5   | 1.2 | 5.52E-03 | 9.2   | 1.3  | 1.21E-01 |  |  |
| UNG       | 6.6   | 1.0 | 8.1   | 1.2 | 1.63E-02 | 7.9   | 1.2  | 3.41E-02 |  |  |
| ABI2      | 7.4   | 1.0 | 9.0   | 1.2 | 7.64E-03 | 8.7   | 1.2  | 1.35E-01 |  |  |
| SF3A3     | 7.6   | 1.0 | 9.3   | 1.2 | 5.09E-03 | 9.8   | 1.3  | 1.28E-01 |  |  |
| DCTN6     | 20.4  | 1.0 | 24.9  | 1.2 | 4.99E-05 | 23.2  | 1.1  | 9.09E-04 |  |  |
| PNPO      | 2.8   | 1.0 | 3.4   | 1.2 | 6.95E-03 | 3.0   | 1.1  | 1.07E-02 |  |  |
| GPR107    | 6.3   | 1.0 | 7.7   | 1.2 | 1.05E-02 | 7.6   | 1.2  | 6.55E-02 |  |  |
| TMED9     | 21.2  | 1.0 | 25.9  | 1.2 | 3.85E-04 | 24.4  | 1.2  | 1.10E-02 |  |  |
| DCAF7     | 6.6   | 1.0 | 8.1   | 1.2 | 1.15E-03 | 8.4   | 1.3  | 6.91E-02 |  |  |
| FAM188B1  | 5.8   | 1.0 | 7.1   | 1.2 | 2.03E-02 | 7.5   | 1.3  | 2.64E-01 |  |  |
| PPT1      | 9.1   | 1.0 | 11.1  | 1.2 | 8.08E-03 | 11.2  | 1.2  | 6.28E-02 |  |  |
| ANAPC10   | 3.2   | 1.0 | 3.9   | 1.2 | 3.89E-02 | 4.1   | 1.3  | 2.00E-01 |  |  |
| PRKAB1    | 3.2   | 1.0 | 3.9   | 1.2 | 2.75E-02 | 4.9   | 1.5  | 5.27E-01 |  |  |
| TRIM27    | 5.0   | 1.0 | 6.1   | 1.2 | 3.67E-02 | 6.4   | 1.3  | 1.25E-01 |  |  |
| HERPUD2   | 3.5   | 1.0 | 4.2   | 1.2 | 4.57E-02 | 5.1   | 1.5  | 3.44E-01 |  |  |
| MKRN2     | 9.9   | 1.0 | 12.1  | 1.2 | 2.35E-02 | 12.0  | 1.2  | 1.50E-01 |  |  |
| SMARCA5   | 7.2   | 1.0 | 8.8   | 1.2 | 2.75E-03 | 9.5   | 1.3  | 2.24E-01 |  |  |
| POLR2C    | 14.7  | 1.0 | 17.9  | 1.2 | 3.51E-04 | 17.9  | 1.2  | 5.88E-03 |  |  |
| ACOT9     | 18.4  | 1.0 | 22.4  | 1.2 | 2.46E-02 | 23.4  | 1.3  | 7.29E-01 |  |  |
| SLC46A3   | 3.5   | 1.0 | 4.3   | 1.2 | 4.95E-02 | 4.0   | 1.1  | 1.55E-01 |  |  |
| TMEM208   | 3.4   | 1.0 | 4.2   | 1.2 | 3.49E-02 | 4.5   | 1.3  | 1.16E-01 |  |  |
| C12orf51  | 3.0   | 1.0 | 3.6   | 1.2 | 4.00E-03 | 4.0   | 1.3  | 1.39E-01 |  |  |
| STAM      | 5.3   | 1.0 | 6.5   | 1.2 | 4.10E-02 | 6.6   | 1.2  | 3.06E-01 |  |  |
| SMC6      | 3.1   | 1.0 | 3.7   | 1.2 | 4.37E-02 | 4.1   | 1.3  | 2.21E-01 |  |  |
| ZFYVE26   | 2.3   | 1.0 | 2.9   | 1.2 | 1.97E-03 | 3.1   | 1.3  | 1.22E-01 |  |  |
| KLHL18    | 2.3   | 1.0 | 2.8   | 1.2 | 3.29E-03 | 3.0   | 1.3  | 6.66E-01 |  |  |
| FAM160A2  | 3.7   | 1.0 | 4.5   | 1.2 | 7.57E-03 | 5.0   | 1.4  | 1.53E-01 |  |  |
| NFYC      | 14.9  | 1.0 | 18.2  | 1.2 | 1.14E-03 | 16.8  | 1.1  | 1.90E-03 |  |  |
| KDM4A     | 3.5   | 1.0 | 4.3   | 1.2 | 1.46E-02 | 4.5   | 1.3  | 1.17E-01 |  |  |
| TTC28     | 2.1   | 1.0 | 2.6   | 1.2 | 5.54E-03 | 2.9   | 1.3  | 3.70E-01 |  |  |
| PPT2      | 5.7   | 1.0 | 7.0   | 1.2 | 1.28E-02 | 6.2   | 1.1  | 6.25E-03 |  |  |
| SERTAD2   | 3.2   | 1.0 | 3.9   | 1.2 | 1.30E-02 | 4.3   | 1.4  | 1.88E-01 |  |  |
| TARS      | 13.5  | 1.0 | 16.4  | 1.2 | 3.30E-02 | 14.1  | 1.1  | 2.72E-02 |  |  |
| EIF4G2    | 120.6 | 1.0 | 147.0 | 1.2 | 5.00E-04 | 157.8 | 1.3  | 1.91E-01 |  |  |
| NFKB1     | 4.2   | 1.0 | 5.1   | 1.2 | 2.54E-02 | 5.7   | 1.4  | 1.93E-01 |  |  |
| MEF2D     | 12.0  | 1.0 | 14.6  | 1.2 | 3.38E-03 | 16.3  | 1.4  | 3.70E-01 |  |  |
| DDX50     | 5.6   | 1.0 | 6.8   | 1.2 | 1.27E-02 | 7.5   | 1.4  | 2.48E-01 |  |  |
| IVD       | 10.5  | 1.0 | 12.8  | 1.2 | 1.98E-03 | 10.6  | 1.0  | 4.32E-03 |  |  |
| OAZ2      | 22.3  | 1.0 | 27.2  | 1.2 | 6.98E-04 | 26.8  | 1.2  | 4.91E-02 |  |  |
| NAPG      | 5.8   | 1.0 | 7.0   | 1.2 | 7.78E-03 | 8.0   | 1.4  | 7.43E-01 |  |  |
| AAAS      | 9.5   | 1.0 | 11.6  | 1.2 | 3.02E-02 | 9.9   | 1.0  | 6.16E-03 |  |  |
| C8orf33   | 4.0   | 1.0 | 4.8   | 1.2 | 7.31E-03 | 4.5   | 1.1  | 8.50E-03 |  |  |
| SCAF4     | 3.7   | 1.0 | 4.5   | 1.2 | 3.95E-03 | 5.5   | 1.5  | 4.91E-01 |  |  |
| TNPO3     | 5.6   | 1.0 | 6.8   | 1.2 | 1.04E-02 | 6.6   | 1.2  | 1.94E-02 |  |  |
| BPNT1     | 2.7   | 1.0 | 3.3   | 1.2 | 7.95E-03 | 3.1   | 1.2  | 1.01E-01 |  |  |
| PGAP3     | 3.4   | 1.0 | 4.1   | 1.2 | 4.76E-02 | 3.7   | 1.1  | 2.00E-02 |  |  |
| CRNKL1    | 2.8   | 1.0 | 3.4   | 1.2 | 3.06E-03 | 3.8   | 1.4  | 4.89E-01 |  |  |
| TOMM34    | 4.3   | 1.0 | 5.3   | 1.2 | 2.42E-03 | 5.9   | 1.4  | 6.45E-01 |  |  |
| DPYSL2    | 16.7  | 1.0 | 20.3  | 1.2 | 1.81E-02 | 22.9  | 1.4  | 3.14E-01 |  |  |
| TAF15     | 21.2  | 1.0 | 25.8  | 1.2 | 1.17E-02 | 26.9  | 1.3  | 6.47E-02 |  |  |
| PPP1R7    | 20.5  | 1.0 | 24.9  | 1.2 | 1.16E-03 | 24.4  | 1.2  | 4.70E-02 |  |  |
| UBQLN1    | 20.3  | 1.0 | 24.7  | 1.2 | 1.35E-03 | 23.8  | 1.2  | 6.44E-03 |  |  |
| KIAA0247  | 4.6   | 1.0 | 5.6   | 1.2 | 1.74E-03 | 7.9   | 1.7  | 6.34E-01 |  |  |
| MLL3      | 3.3   | 1.0 | 4.0   | 1.2 | 2.56E-03 | 4.0   | 1.2  | 5.70E-02 |  |  |
| ZNF574    | 2.1   | 1.0 | 2.5   | 1.2 | 4.86E-02 | 2.5   | 1.2  | 1.63E-01 |  |  |

|           |       |     |       |     |          |       |      |          |  |  |
|-----------|-------|-----|-------|-----|----------|-------|------|----------|--|--|
| CASQ2     | 273.2 | 1.0 | 332.3 | 1.2 | 1.45E-02 | 286.9 | 1.1  | 1.85E-01 |  |  |
| C2orf29   | 9.0   | 1.0 | 10.9  | 1.2 | 3.18E-02 | 11.4  | 1.3  | 9.78E-01 |  |  |
| HSPB8     | 90.4  | 1.0 | 109.9 | 1.2 | 1.94E-02 | 147.3 | 1.6  | 7.42E-02 |  |  |
| SLC39A6   | 2.9   | 1.0 | 3.5   | 1.2 | 6.60E-03 | 3.7   | 1.3  | 1.28E-01 |  |  |
| CHMP1B    | 9.7   | 1.0 | 11.8  | 1.2 | 2.22E-03 | 14.8  | 1.5  | 3.06E-01 |  |  |
| C4orf32   | 5.9   | 1.0 | 7.2   | 1.2 | 3.05E-02 | 9.0   | 1.5  | 8.33E-01 |  |  |
| GPR137    | 4.0   | 1.0 | 4.9   | 1.2 | 2.94E-02 | 4.7   | 1.2  | 1.22E-01 |  |  |
| ATF6B     | 10.1  | 1.0 | 12.3  | 1.2 | 2.77E-02 | 12.1  | 1.2  | 1.98E-02 |  |  |
| ATP6V1B2  | 11.4  | 1.0 | 13.8  | 1.2 | 1.90E-03 | 16.8  | 1.5  | 4.53E-01 |  |  |
| PUM1      | 10.0  | 1.0 | 12.1  | 1.2 | 6.47E-03 | 12.8  | 1.3  | 8.18E-02 |  |  |
| TRIM23    | 2.9   | 1.0 | 3.6   | 1.2 | 9.23E-03 | 4.0   | 1.4  | 5.44E-01 |  |  |
| TTL5      | 2.3   | 1.0 | 2.8   | 1.2 | 1.06E-02 | 2.6   | 1.1  | 9.70E-03 |  |  |
| ARHGAP17  | 8.9   | 1.0 | 10.8  | 1.2 | 3.91E-04 | 14.7  | 1.7  | 8.24E-01 |  |  |
| PAIP2     | 47.1  | 1.0 | 57.2  | 1.2 | 4.47E-04 | 55.8  | 1.2  | 8.12E-02 |  |  |
| PGAM1     | 72.4  | 1.0 | 87.9  | 1.2 | 1.43E-02 | 73.5  | 1.0  | 4.63E-03 |  |  |
| LOC151162 | 12.1  | 1.0 | 14.7  | 1.2 | 9.81E-03 | 12.8  | 1.1  | 7.51E-02 |  |  |
| KIAA1191  | 18.4  | 1.0 | 22.3  | 1.2 | 1.00E-03 | 25.7  | 1.4  | 3.71E-01 |  |  |
| TNPO1     | 5.3   | 1.0 | 6.4   | 1.2 | 2.90E-02 | 6.4   | 1.2  | 2.38E-01 |  |  |
| NSF       | 3.7   | 1.0 | 4.5   | 1.2 | 1.08E-02 | 4.5   | 1.2  | 1.53E-01 |  |  |
| TMEM80    | 3.1   | 1.0 | 3.8   | 1.2 | 8.24E-03 | 3.4   | 1.1  | 8.35E-03 |  |  |
| GATAD1    | 2.4   | 1.0 | 2.9   | 1.2 | 4.39E-02 | 3.2   | 1.3  | 1.28E-01 |  |  |
| CIRBP     | 41.8  | 1.0 | 50.7  | 1.2 | 1.02E-02 | 48.8  | 1.2  | 1.87E-02 |  |  |
| PNRC2     | 22.0  | 1.0 | 26.7  | 1.2 | 1.78E-04 | 29.7  | 1.3  | 1.56E-01 |  |  |
| TBP       | 2.3   | 1.0 | 2.8   | 1.2 | 3.79E-02 | 3.2   | 1.4  | 2.97E-01 |  |  |
| ERLEC1    | 10.7  | 1.0 | 13.0  | 1.2 | 4.84E-05 | 12.5  | 1.2  | 1.26E-03 |  |  |
| SMARCE1   | 20.1  | 1.0 | 24.3  | 1.2 | 5.86E-03 | 25.8  | 1.3  | 3.60E-02 |  |  |
| TOMM22    | 13.4  | 1.0 | 16.3  | 1.2 | 4.30E-03 | 15.6  | 1.2  | 1.90E-04 |  |  |
| CCDC104   | 9.9   | 1.0 | 12.0  | 1.2 | 8.41E-03 | 12.5  | 1.3  | 5.15E-02 |  |  |
| NFRKB     | 2.4   | 1.0 | 2.9   | 1.2 | 2.70E-02 | 2.9   | 1.2  | 1.28E-01 |  |  |
| COPG      | 18.1  | 1.0 | 21.9  | 1.2 | 1.20E-02 | 21.2  | 1.2  | 5.94E-02 |  |  |
| LYPLAL1   | 7.7   | 1.0 | 9.3   | 1.2 | 1.09E-02 | 9.1   | 1.2  | 3.59E-01 |  |  |
| DYNC1H1   | 25.1  | 1.0 | 30.4  | 1.2 | 1.17E-04 | 26.9  | 1.1  | 3.11E-03 |  |  |
| SGTA      | 20.4  | 1.0 | 24.8  | 1.2 | 7.11E-03 | 24.5  | 1.2  | 5.66E-02 |  |  |
| C7orf42   | 8.1   | 1.0 | 9.8   | 1.2 | 1.79E-02 | 10.1  | 1.2  | 8.06E-02 |  |  |
| SEPT7     | 41.3  | 1.0 | 50.0  | 1.2 | 2.21E-02 | 47.8  | 1.2  | 9.09E-02 |  |  |
| SPTLC2    | 1.9   | 1.0 | 2.4   | 1.2 | 4.83E-02 | 2.8   | 1.4  | 2.39E-01 |  |  |
| BAZ2A     | 6.2   | 1.0 | 7.6   | 1.2 | 1.80E-02 | 9.3   | 1.5  | 5.83E-01 |  |  |
| SNX5      | 13.5  | 1.0 | 16.3  | 1.2 | 4.49E-03 | 15.7  | 1.2  | 2.10E-02 |  |  |
| IFT57     | 3.9   | 1.0 | 4.7   | 1.2 | 1.67E-02 | 4.9   | 1.3  | 1.29E-01 |  |  |
| CYTH2     | 3.6   | 1.0 | 4.3   | 1.2 | 4.19E-02 | 5.4   | 1.5  | 4.39E-01 |  |  |
| CNOT3     | 4.6   | 1.0 | 5.6   | 1.2 | 9.55E-03 | 6.3   | 1.4  | 1.88E-01 |  |  |
| SFPQ      | 13.9  | 1.0 | 16.8  | 1.2 | 2.85E-02 | 21.1  | 1.5  | 8.19E-01 |  |  |
| KIAA1429  | 3.3   | 1.0 | 4.0   | 1.2 | 5.50E-03 | 4.1   | 1.3  | 1.09E-01 |  |  |
| PIGK      | 4.1   | 1.0 | 5.0   | 1.2 | 3.50E-03 | 4.1   | 1.0  | 9.34E-03 |  |  |
| VEZT      | 7.9   | 1.0 | 9.5   | 1.2 | 6.31E-03 | 9.6   | 1.2  | 2.62E-02 |  |  |
| FNDC3B    | 7.1   | 1.0 | 8.6   | 1.2 | 3.79E-02 | 13.8  | 1.9  | 1.42E-01 |  |  |
| IFT74     | 3.6   | 1.0 | 4.4   | 1.2 | 1.90E-02 | 3.9   | 1.1  | 1.03E-02 |  |  |
| ZFYVE20   | 2.9   | 1.0 | 3.6   | 1.2 | 3.56E-02 | 3.6   | 1.2  | 1.40E-01 |  |  |
| LAPTM4B   | 74.4  | 1.0 | 90.0  | 1.2 | 1.46E-02 | 75.7  | 1.0  | 1.50E-01 |  |  |
| RABL3     | 2.4   | 1.0 | 3.0   | 1.2 | 1.96E-02 | 3.0   | 1.2  | 1.00E-01 |  |  |
| PIBF1     | 2.8   | 1.0 | 3.3   | 1.2 | 5.34E-03 | 3.5   | 1.3  | 1.17E-01 |  |  |
| ARF1      | 94.6  | 1.0 | 114.3 | 1.2 | 1.47E-05 | 115.0 | 1.2  | 3.09E-02 |  |  |
| C1orf35   | 2.0   | 1.0 | 2.4   | 1.2 | 2.63E-02 | 2.4   | 1.2  | 1.03E-01 |  |  |
| RDBP      | 8.7   | 1.0 | 10.5  | 1.2 | 3.88E-03 | 11.1  | 1.3  | 1.19E-02 |  |  |
| DHX40     | 4.9   | 1.0 | 5.9   | 1.2 | 3.69E-03 | 6.3   | 1.3  | 1.35E-01 |  |  |
| SETD7     | 11.5  | 1.0 | 13.9  | 1.2 | 2.00E-02 | 15.3  | 1.3  | 6.53E-01 |  |  |
| SLAIN2    | 9.4   | 1.0 | 11.3  | 1.2 | 1.12E-02 | 12.6  | 1.3  | 9.21E-01 |  |  |
| NOLC1     | 7.2   | 1.0 | 8.7   | 1.2 | 3.02E-03 | 10.0  | 1.4  | 2.32E-01 |  |  |
| SCCPDH    | 9.4   | 1.0 | 11.3  | 1.2 | 2.97E-02 | 10.0  | 1.1  | 1.76E-02 |  |  |
| C17orf75  | 4.3   | 1.0 | 5.2   | 1.2 | 3.09E-02 | 4.0   | -1.1 | 2.16E-02 |  |  |
| CYB5B     | 5.5   | 1.0 | 6.6   | 1.2 | 6.77E-03 | 6.0   | 1.1  | 1.08E-02 |  |  |
| ARIH2     | 27.0  | 1.0 | 32.6  | 1.2 | 3.23E-02 | 34.0  | 1.3  | 6.54E-01 |  |  |
| AFTPH     | 2.5   | 1.0 | 3.0   | 1.2 | 3.61E-02 | 3.7   | 1.5  | 3.30E-01 |  |  |
| RABGEF1   | 3.8   | 1.0 | 4.6   | 1.2 | 3.96E-03 | 4.2   | 1.1  | 1.10E-02 |  |  |
| DET1      | 2.4   | 1.0 | 2.9   | 1.2 | 3.76E-02 | 2.7   | 1.1  | 1.89E-02 |  |  |
| ACD       | 2.1   | 1.0 | 2.5   | 1.2 | 4.12E-02 | 3.1   | 1.5  | 5.72E-01 |  |  |
| PHF12     | 4.2   | 1.0 | 5.1   | 1.2 | 1.01E-02 | 6.0   | 1.4  | 3.94E-01 |  |  |
| HSPA13    | 3.3   | 1.0 | 4.0   | 1.2 | 3.43E-02 | 4.2   | 1.3  | 4.16E-01 |  |  |
| PHF21A    | 3.6   | 1.0 | 4.4   | 1.2 | 9.99E-03 | 4.2   | 1.1  | 4.19E-02 |  |  |
| CHD6      | 3.7   | 1.0 | 4.4   | 1.2 | 2.18E-02 | 4.5   | 1.2  | 1.23E-01 |  |  |
| CHD2      | 6.3   | 1.0 | 7.6   | 1.2 | 3.02E-02 | 8.7   | 1.4  | 1.77E-01 |  |  |
| NPM1      | 76.4  | 1.0 | 92.1  | 1.2 | 8.51E-03 | 103.0 | 1.3  | 1.01E-01 |  |  |
| SCAF1     | 4.3   | 1.0 | 5.2   | 1.2 | 4.52E-04 | 5.6   | 1.3  | 1.01E-01 |  |  |
| ZNFX1     | 5.6   | 1.0 | 6.7   | 1.2 | 3.82E-02 | 7.1   | 1.3  | 1.63E-01 |  |  |
| PPIL4     | 4.9   | 1.0 | 5.8   | 1.2 | 4.93E-03 | 6.6   | 1.4  | 1.28E-01 |  |  |
| C19orf25  | 2.4   | 1.0 | 2.9   | 1.2 | 8.07E-03 | 3.3   | 1.4  | 1.21E-01 |  |  |
| CRAMP1L   | 2.8   | 1.0 | 3.4   | 1.2 | 8.74E-03 | 4.5   | 1.6  | 5.90E-01 |  |  |
| TMEM9     | 6.4   | 1.0 | 7.7   | 1.2 | 2.06E-02 | 6.5   | 1.0  | 1.76E-02 |  |  |
| DNAJC13   | 5.0   | 1.0 | 6.0   | 1.2 | 4.93E-02 | 5.7   | 1.2  | 1.30E-01 |  |  |
| TMEM167B  | 9.3   | 1.0 | 11.2  | 1.2 | 1.95E-02 | 11.2  | 1.2  | 5.96E-02 |  |  |
| RNF214    | 4.1   | 1.0 | 4.9   | 1.2 | 4.12E-02 | 4.6   | 1.1  | 7.94E-02 |  |  |
| TMEM127   | 17.4  | 1.0 | 21.0  | 1.2 | 5.61E-04 | 17.3  | -1.0 | 1.03E-03 |  |  |
| UBL3      | 6.2   | 1.0 | 7.4   | 1.2 | 1.54E-02 | 8.1   | 1.3  | 2.16E-01 |  |  |
| COPB2     | 17.1  | 1.0 | 20.6  | 1.2 | 1.03E-02 | 20.6  | 1.2  | 1.19E-01 |  |  |
| SRPK2     | 4.6   | 1.0 | 5.6   | 1.2 | 4.39E-02 | 6.1   | 1.3  | 3.40E-01 |  |  |
| FUS       | 9.5   | 1.0 | 11.5  | 1.2 | 3.96E-02 | 12.4  | 1.3  | 1.35E-01 |  |  |
| WDR75     | 5.1   | 1.0 | 6.2   | 1.2 | 1.08E-02 | 6.6   | 1.3  | 1.13E-01 |  |  |
| CHERP     | 4.6   | 1.0 | 5.5   | 1.2 | 2.55E-02 | 5.9   | 1.3  | 6.20E-02 |  |  |



|           |        |     |        |      |          |        |      |          |   |   |
|-----------|--------|-----|--------|------|----------|--------|------|----------|---|---|
| ZFYVE16   | 4.3    | 1.0 | 5.1    | 1.2  | 4.35E-02 | 5.6    | 1.3  | 8.41E-01 |   |   |
| RBM14     | 3.1    | 1.0 | 3.7    | 1.2  | 4.33E-02 | 4.6    | 1.5  | 4.64E-01 |   |   |
| FAF2      | 3.8    | 1.0 | 4.6    | 1.2  | 3.23E-02 | 5.2    | 1.4  | 2.72E-01 |   |   |
| RNF20     | 10.0   | 1.0 | 12.0   | 1.2  | 1.77E-03 | 11.2   | 1.1  | 1.47E-02 |   |   |
| VPS33A    | 2.4    | 1.0 | 2.9    | 1.2  | 3.74E-02 | 2.6    | 1.1  | 4.54E-02 |   |   |
| AZI2      | 5.3    | 1.0 | 6.4    | 1.2  | 7.98E-04 | 7.2    | 1.4  | 1.15E-01 |   |   |
| PPP2CA    | 32.8   | 1.0 | 39.4   | 1.2  | 2.38E-03 | 41.0   | 1.3  | 1.73E-01 |   |   |
| TAF9B     | 5.2    | 1.0 | 6.2    | 1.2  | 3.12E-02 | 6.1    | 1.2  | 2.03E-01 |   |   |
| DDX6      | 13.4   | 1.0 | 16.1   | 1.2  | 4.18E-02 | 15.4   | 1.2  | 5.32E-02 |   |   |
| MBD1      | 7.5    | 1.0 | 9.0    | 1.2  | 5.26E-03 | 9.3    | 1.2  | 8.21E-02 |   |   |
| DNAJB2    | 19.6   | 1.0 | 23.6   | 1.2  | 1.63E-02 | 25.9   | 1.3  | 1.16E-01 |   |   |
| SAFB      | 14.8   | 1.0 | 17.7   | 1.2  | 6.29E-03 | 20.6   | 1.4  | 2.48E-01 |   |   |
| C18orf32  | 12.7   | 1.0 | 15.2   | 1.2  | 1.29E-03 | 14.1   | 1.1  | 5.24E-03 |   |   |
| SRSF6     | 14.6   | 1.0 | 17.6   | 1.2  | 3.20E-02 | 25.3   | 1.7  | 9.65E-01 |   |   |
| FAM98B    | 6.5    | 1.0 | 7.8    | 1.2  | 4.53E-02 | 7.8    | 1.2  | 3.61E-01 |   |   |
| ERCC3     | 7.3    | 1.0 | 8.7    | 1.2  | 1.81E-04 | 9.2    | 1.3  | 6.65E-02 |   |   |
| BZW2      | 99.7   | 1.0 | 79.7   | -1.3 | 1.69E-02 | 90.8   | -1.1 | 3.01E-01 |   |   |
| SLC29A1   | 42.0   | 1.0 | 33.6   | -1.3 | 5.24E-03 | 26.9   | -1.6 | 1.36E-02 |   |   |
| HINT1     | 63.7   | 1.0 | 50.8   | -1.3 | 1.47E-03 | 55.8   | -1.1 | 3.34E-01 |   |   |
| COP55     | 38.0   | 1.0 | 30.3   | -1.3 | 1.95E-04 | 32.6   | -1.2 | 5.59E-01 |   |   |
| METAP1    | 17.4   | 1.0 | 13.8   | -1.3 | 7.75E-03 | 14.3   | -1.2 | 3.60E-01 |   |   |
| NDUFB6    | 40.6   | 1.0 | 32.3   | -1.3 | 9.74E-03 | 35.1   | -1.2 | 8.87E-01 |   |   |
| UQCRC1    | 254.8  | 1.0 | 202.7  | -1.3 | 6.85E-06 | 212.4  | -1.2 | 7.47E-01 |   |   |
| PMF1      | 20.6   | 1.0 | 16.4   | -1.3 | 2.31E-03 | 17.7   | -1.2 | 8.96E-01 |   |   |
| SLC25A12  | 31.5   | 1.0 | 25.0   | -1.3 | 3.53E-04 | 21.4   | -1.5 | 2.85E-02 |   |   |
| SEPW1     | 262.2  | 1.0 | 208.4  | -1.3 | 1.02E-04 | 233.1  | -1.1 | 5.29E-01 |   |   |
| SMTN      | 24.0   | 1.0 | 19.0   | -1.3 | 2.85E-02 | 25.6   | 1.1  | 3.49E-01 |   |   |
| RBPM52    | 67.4   | 1.0 | 53.5   | -1.3 | 2.51E-02 | 57.5   | -1.2 | 5.59E-01 |   |   |
| NDUFB10   | 213.4  | 1.0 | 169.3  | -1.3 | 2.71E-04 | 168.3  | -1.3 | 4.54E-01 |   |   |
| PPP1R16A  | 12.3   | 1.0 | 9.8    | -1.3 | 4.31E-03 | 8.0    | -1.6 | 1.66E-03 |   |   |
| ZBTB43    | 5.2    | 1.0 | 4.1    | -1.3 | 9.55E-04 | 4.9    | -1.1 | 7.37E-01 |   |   |
| PLN       | 792.3  | 1.0 | 627.8  | -1.3 | 4.41E-03 | 622.8  | -1.3 | 8.52E-01 |   |   |
| ICAM2     | 19.4   | 1.0 | 15.4   | -1.3 | 3.57E-02 | 22.4   | 1.2  | 8.48E-01 |   |   |
| NACC1     | 5.1    | 1.0 | 4.1    | -1.3 | 4.13E-02 | 4.9    | -1.0 | 3.81E-01 |   |   |
| MRPL33    | 136.4  | 1.0 | 107.9  | -1.3 | 1.44E-02 | 115.2  | -1.2 | 9.30E-01 |   |   |
| MTIF3     | 53.2   | 1.0 | 42.1   | -1.3 | 1.04E-02 | 44.0   | -1.2 | 7.61E-01 |   |   |
| DES       | 4724.2 | 1.0 | 3735.1 | -1.3 | 1.27E-02 | 4192.5 | -1.1 | 4.67E-01 |   |   |
| RCS1      | 13.4   | 1.0 | 10.6   | -1.3 | 2.04E-02 | 13.2   | -1.0 | 4.49E-01 |   |   |
| TENC1     | 37.9   | 1.0 | 29.9   | -1.3 | 2.62E-02 | 52.0   | 1.4  | 7.06E-01 |   |   |
| GLRX2     | 7.0    | 1.0 | 5.5    | -1.3 | 1.46E-02 | 7.7    | 1.1  | 4.97E-02 | v | v |
| COX5A     | 376.3  | 1.0 | 296.9  | -1.3 | 4.00E-04 | 293.1  | -1.3 | 7.35E-01 |   |   |
| TNNT2     | 4850.3 | 1.0 | 3826.7 | -1.3 | 2.03E-05 | 3948.7 | -1.2 | 8.48E-01 |   |   |
| C6orf136  | 13.1   | 1.0 | 10.3   | -1.3 | 5.26E-03 | 9.2    | -1.4 | 8.30E-02 |   |   |
| TACC1     | 14.8   | 1.0 | 11.7   | -1.3 | 5.48E-03 | 22.1   | 1.5  | 5.53E-01 |   |   |
| ATAD3A    | 5.2    | 1.0 | 4.1    | -1.3 | 6.60E-03 | 4.6    | -1.1 | 5.77E-01 |   |   |
| MCRS1     | 27.5   | 1.0 | 21.7   | -1.3 | 3.63E-04 | 23.0   | -1.2 | 9.47E-01 |   |   |
| NDUFS6    | 121.7  | 1.0 | 96.0   | -1.3 | 4.35E-03 | 98.1   | -1.2 | 6.09E-01 |   |   |
| CCDC85C   | 4.1    | 1.0 | 3.2    | -1.3 | 3.31E-03 | 2.9    | -1.4 | 6.68E-02 |   |   |
| ITGB1BP2  | 29.5   | 1.0 | 23.3   | -1.3 | 2.38E-02 | 19.2   | -1.5 | 5.40E-02 |   |   |
| C10orf58  | 25.9   | 1.0 | 20.4   | -1.3 | 2.67E-02 | 20.1   | -1.3 | 1.67E-01 |   |   |
| FBRSL1    | 5.5    | 1.0 | 4.3    | -1.3 | 1.77E-03 | 5.7    | 1.0  | 4.04E-01 |   |   |
| NHLRC2    | 4.3    | 1.0 | 3.4    | -1.3 | 1.08E-02 | 4.2    | -1.0 | 4.12E-01 |   |   |
| ATP1B1    | 84.9   | 1.0 | 66.8   | -1.3 | 8.17E-03 | 69.6   | -1.2 | 7.82E-01 |   |   |
| RHOT1     | 11.4   | 1.0 | 9.0    | -1.3 | 4.30E-03 | 8.4    | -1.4 | 6.24E-03 |   |   |
| ESRRA     | 34.9   | 1.0 | 27.5   | -1.3 | 5.57E-04 | 28.1   | -1.2 | 7.95E-01 |   |   |
| ATF4      | 82.5   | 1.0 | 64.9   | -1.3 | 4.07E-02 | 93.9   | 1.1  | 7.83E-01 |   |   |
| PLCL1     | 16.0   | 1.0 | 12.5   | -1.3 | 9.13E-03 | 15.2   | -1.0 | 2.71E-01 |   |   |
| FAM195A   | 18.9   | 1.0 | 14.9   | -1.3 | 2.39E-02 | 14.2   | -1.3 | 3.03E-01 |   |   |
| NDUFB2    | 154.5  | 1.0 | 121.4  | -1.3 | 1.42E-05 | 133.0  | -1.2 | 5.66E-01 |   |   |
| TEAD1     | 10.5   | 1.0 | 8.3    | -1.3 | 9.69E-04 | 8.6    | -1.2 | 2.71E-01 |   |   |
| PTPLA     | 28.8   | 1.0 | 22.6   | -1.3 | 4.34E-02 | 25.9   | -1.1 | 3.68E-01 |   |   |
| WDR34     | 8.9    | 1.0 | 7.0    | -1.3 | 1.98E-03 | 7.3    | -1.2 | 6.41E-01 |   |   |
| NGLY1     | 7.1    | 1.0 | 5.6    | -1.3 | 2.58E-02 | 6.5    | -1.1 | 5.15E-01 |   |   |
| GALNTL1   | 18.3   | 1.0 | 14.4   | -1.3 | 1.14E-02 | 15.8   | -1.2 | 7.33E-01 |   |   |
| USP2      | 15.2   | 1.0 | 12.0   | -1.3 | 2.56E-02 | 14.2   | -1.1 | 5.04E-01 |   |   |
| RBFOX1    | 11.6   | 1.0 | 9.1    | -1.3 | 1.25E-02 | 8.7    | -1.3 | 6.89E-01 |   |   |
| C17orf37  | 18.9   | 1.0 | 14.8   | -1.3 | 1.32E-02 | 15.9   | -1.2 | 4.96E-01 |   |   |
| GTPBP6    | 16.0   | 1.0 | 12.5   | -1.3 | 3.29E-03 | 14.5   | -1.1 | 7.61E-01 |   |   |
| C22orf13  | 22.7   | 1.0 | 17.8   | -1.3 | 1.12E-03 | 16.6   | -1.4 | 1.40E-02 |   |   |
| ECSIT     | 37.6   | 1.0 | 29.4   | -1.3 | 5.65E-04 | 31.0   | -1.2 | 9.18E-01 |   |   |
| ZDHHC12   | 2.5    | 1.0 | 2.0    | -1.3 | 7.77E-04 | 2.1    | -1.2 | 8.88E-02 |   |   |
| TMEM93    | 19.6   | 1.0 | 15.3   | -1.3 | 8.51E-03 | 17.2   | -1.1 | 7.01E-01 |   |   |
| TIMM44    | 17.0   | 1.0 | 13.3   | -1.3 | 1.25E-03 | 13.5   | -1.3 | 2.49E-01 |   |   |
| MTUS1     | 39.1   | 1.0 | 30.5   | -1.3 | 6.85E-03 | 43.7   | 1.1  | 8.18E-02 |   |   |
| XK        | 2.0    | 1.0 | 1.6    | -1.3 | 2.65E-03 | 3.7    | 1.8  | 2.45E-03 |   |   |
| LIMS2     | 44.3   | 1.0 | 34.5   | -1.3 | 3.83E-03 | 34.0   | -1.3 | 6.01E-02 |   |   |
| SSR3      | 20.8   | 1.0 | 16.2   | -1.3 | 3.59E-03 | 22.7   | 1.1  | 4.97E-02 | v | v |
| COX17     | 91.8   | 1.0 | 71.5   | -1.3 | 5.88E-03 | 88.9   | -1.0 | 4.23E-01 |   |   |
| C21orf63  | 4.8    | 1.0 | 3.8    | -1.3 | 2.08E-02 | 6.8    | 1.4  | 4.35E-01 |   |   |
| C14orf142 | 5.5    | 1.0 | 4.3    | -1.3 | 3.55E-03 | 4.3    | -1.3 | 7.00E-01 |   |   |
| C12orf52  | 4.4    | 1.0 | 3.4    | -1.3 | 3.64E-04 | 3.3    | -1.3 | 2.11E-02 |   |   |
| SLC39A14  | 27.4   | 1.0 | 21.3   | -1.3 | 4.91E-02 | 28.3   | 1.0  | 2.57E-01 |   |   |
| AQP1      | 83.9   | 1.0 | 65.1   | -1.3 | 3.14E-02 | 109.9  | 1.3  | 3.98E-02 |   |   |
| RABGGTA   | 5.6    | 1.0 | 4.3    | -1.3 | 1.72E-03 | 4.8    | -1.2 | 1.81E-01 |   |   |
| SPATA24   | 3.4    | 1.0 | 2.7    | -1.3 | 4.94E-02 | 2.8    | -1.2 | 6.43E-01 |   |   |
| C7orf70   | 6.8    | 1.0 | 5.3    | -1.3 | 1.88E-03 | 5.6    | -1.2 | 4.82E-01 |   |   |
| AHCY      | 22.0   | 1.0 | 17.1   | -1.3 | 3.54E-03 | 19.5   | -1.1 | 7.47E-01 |   |   |
| COQ3      | 11.2   | 1.0 | 8.7    | -1.3 | 1.41E-03 | 7.9    | -1.4 | 1.76E-01 |   |   |

|          |        |     |        |      |          |        |      |          |   |   |
|----------|--------|-----|--------|------|----------|--------|------|----------|---|---|
| PLCXD3   | 15.0   | 1.0 | 11.6   | -1.3 | 1.64E-02 | 18.3   | 1.2  | 5.43E-02 |   |   |
| FEM1A    | 23.3   | 1.0 | 18.0   | -1.3 | 2.29E-04 | 21.0   | -1.1 | 1.74E-01 |   |   |
| AVEN     | 7.5    | 1.0 | 5.8    | -1.3 | 4.00E-02 | 6.3    | -1.2 | 9.03E-01 |   |   |
| MTG1     | 4.5    | 1.0 | 3.5    | -1.3 | 2.99E-02 | 4.1    | -1.1 | 4.05E-01 |   |   |
| FUNDC2   | 42.2   | 1.0 | 32.5   | -1.3 | 2.39E-06 | 34.9   | -1.2 | 7.65E-01 |   |   |
| TPST2    | 8.4    | 1.0 | 6.5    | -1.3 | 4.66E-02 | 9.2    | 1.1  | 9.31E-01 |   |   |
| PPP1R3B  | 12.8   | 1.0 | 9.8    | -1.3 | 2.55E-02 | 12.6   | -1.0 | 8.15E-02 |   |   |
| LRRC39   | 53.9   | 1.0 | 41.3   | -1.3 | 1.77E-02 | 33.1   | -1.6 | 1.94E-01 |   |   |
| C6orf106 | 30.6   | 1.0 | 23.5   | -1.3 | 2.75E-04 | 28.0   | -1.1 | 4.15E-01 |   |   |
| NDUFB1   | 140.9  | 1.0 | 108.0  | -1.3 | 5.97E-03 | 114.2  | -1.2 | 8.65E-01 |   |   |
| PODXL    | 21.6   | 1.0 | 16.6   | -1.3 | 3.86E-03 | 16.3   | -1.3 | 3.38E-02 |   |   |
| ATP5G1   | 140.6  | 1.0 | 107.8  | -1.3 | 4.15E-03 | 112.5  | -1.3 | 9.52E-01 |   |   |
| PPIP5K2  | 4.0    | 1.0 | 3.1    | -1.3 | 2.17E-02 | 4.1    | 1.0  | 6.11E-01 |   |   |
| TMEM189  | 7.2    | 1.0 | 5.5    | -1.3 | 7.43E-03 | 6.1    | -1.2 | 2.95E-01 |   |   |
| DEXI     | 26.1   | 1.0 | 20.0   | -1.3 | 4.29E-03 | 21.3   | -1.2 | 5.94E-01 |   |   |
| SLC25A13 | 2.5    | 1.0 | 1.9    | -1.3 | 3.41E-02 | 2.4    | -1.1 | 4.27E-01 |   |   |
| C8orf38  | 6.0    | 1.0 | 4.6    | -1.3 | 7.54E-03 | 4.0    | -1.5 | 3.81E-02 |   |   |
| IL17RC   | 7.7    | 1.0 | 5.9    | -1.3 | 1.55E-02 | 7.3    | -1.1 | 9.68E-01 |   |   |
| P2RY2    | 2.7    | 1.0 | 2.1    | -1.3 | 8.19E-03 | 2.1    | -1.3 | 9.24E-01 |   |   |
| ISOC1    | 24.1   | 1.0 | 18.4   | -1.3 | 1.13E-02 | 15.4   | -1.6 | 1.08E-01 |   |   |
| MFSD3    | 4.3    | 1.0 | 3.3    | -1.3 | 3.20E-02 | 3.5    | -1.2 | 7.23E-01 |   |   |
| PPP3CC   | 11.6   | 1.0 | 8.8    | -1.3 | 1.04E-02 | 11.6   | 1.0  | 3.67E-01 |   |   |
| CLGN     | 34.7   | 1.0 | 26.4   | -1.3 | 3.78E-02 | 25.0   | -1.4 | 6.52E-01 |   |   |
| EPS15L1  | 15.6   | 1.0 | 11.9   | -1.3 | 1.77E-04 | 13.5   | -1.2 | 6.25E-01 |   |   |
| ZNF189   | 6.9    | 1.0 | 5.3    | -1.3 | 3.84E-02 | 19.6   | 2.8  | 1.01E-03 |   |   |
| ZNF787   | 5.2    | 1.0 | 3.9    | -1.3 | 4.35E-03 | 4.7    | -1.1 | 3.02E-01 |   |   |
| KIFC2    | 3.2    | 1.0 | 2.4    | -1.3 | 3.29E-02 | 3.0    | -1.1 | 3.74E-01 |   |   |
| MYL3     | 2431.3 | 1.0 | 1850.1 | -1.3 | 3.64E-04 | 1653.7 | -1.5 | 1.51E-01 |   |   |
| EFNB1    | 7.0    | 1.0 | 5.3    | -1.3 | 1.68E-02 | 7.0    | 1.0  | 7.54E-01 |   |   |
| CAPN10   | 4.8    | 1.0 | 3.7    | -1.3 | 1.12E-02 | 4.4    | -1.1 | 4.98E-01 |   |   |
| TRPM7    | 4.7    | 1.0 | 3.6    | -1.3 | 2.71E-03 | 4.4    | -1.1 | 7.16E-01 |   |   |
| MAPKAPK3 | 109.1  | 1.0 | 82.9   | -1.3 | 4.10E-05 | 83.8   | -1.3 | 9.54E-01 |   |   |
| TMEM70   | 7.5    | 1.0 | 5.7    | -1.3 | 3.09E-03 | 6.1    | -1.2 | 2.14E-01 |   |   |
| STRADB   | 15.7   | 1.0 | 12.0   | -1.3 | 3.23E-04 | 11.1   | -1.4 | 2.22E-01 |   |   |
| TTN      | 93.0   | 1.0 | 70.6   | -1.3 | 5.75E-04 | 83.8   | -1.1 | 2.72E-01 |   |   |
| PGP      | 9.4    | 1.0 | 7.2    | -1.3 | 3.77E-04 | 6.8    | -1.4 | 1.09E-01 |   |   |
| EGLN1    | 11.8   | 1.0 | 9.0    | -1.3 | 6.96E-04 | 11.5   | -1.0 | 4.30E-01 |   |   |
| SNHG6    | 31.0   | 1.0 | 23.5   | -1.3 | 3.66E-03 | 32.2   | 1.0  | 4.93E-01 |   |   |
| TTYH2    | 8.5    | 1.0 | 6.4    | -1.3 | 7.16E-04 | 7.2    | -1.2 | 8.24E-01 |   |   |
| TMEM150C | 4.9    | 1.0 | 3.7    | -1.3 | 3.09E-02 | 4.0    | -1.2 | 1.56E-01 |   |   |
| SPARCL1  | 305.3  | 1.0 | 231.2  | -1.3 | 1.70E-02 | 309.4  | 1.0  | 6.99E-01 |   |   |
| C6orf129 | 6.7    | 1.0 | 5.1    | -1.3 | 7.16E-03 | 6.0    | -1.1 | 9.56E-01 |   |   |
| IL15RA   | 3.2    | 1.0 | 2.4    | -1.3 | 1.10E-02 | 3.8    | 1.2  | 4.65E-01 |   |   |
| SLC7A6   | 14.3   | 1.0 | 10.8   | -1.3 | 7.48E-03 | 15.6   | 1.1  | 4.26E-02 | √ | √ |
| ASPSCR1  | 4.9    | 1.0 | 3.7    | -1.3 | 8.88E-04 | 4.2    | -1.2 | 4.49E-01 |   |   |
| RASL12   | 5.6    | 1.0 | 4.2    | -1.3 | 3.38E-02 | 5.2    | -1.1 | 8.42E-01 |   |   |
| ERCC1    | 28.6   | 1.0 | 21.6   | -1.3 | 4.21E-05 | 22.1   | -1.3 | 5.15E-01 |   |   |
| ACSS3    | 5.8    | 1.0 | 4.3    | -1.3 | 4.71E-03 | 6.0    | 1.0  | 3.70E-01 |   |   |
| C9orf5   | 11.1   | 1.0 | 8.4    | -1.3 | 9.94E-04 | 9.7    | -1.1 | 7.24E-01 |   |   |
| KLHDC3   | 31.6   | 1.0 | 23.9   | -1.3 | 8.11E-04 | 30.0   | -1.1 | 6.67E-01 |   |   |
| COL27A1  | 4.1    | 1.0 | 3.1    | -1.3 | 4.32E-02 | 3.9    | -1.1 | 4.66E-01 |   |   |
| ZBTB7B   | 7.6    | 1.0 | 5.7    | -1.3 | 2.16E-02 | 8.6    | 1.1  | 1.46E-01 |   |   |
| ACADVL   | 279.5  | 1.0 | 210.7  | -1.3 | 5.41E-05 | 246.6  | -1.1 | 2.51E-01 |   |   |
| BAIAP2   | 3.7    | 1.0 | 2.8    | -1.3 | 3.55E-02 | 7.0    | 1.9  | 7.64E-04 |   |   |
| DVL1     | 20.5   | 1.0 | 15.4   | -1.3 | 2.00E-04 | 16.6   | -1.2 | 5.71E-01 |   |   |
| MPST     | 16.1   | 1.0 | 12.1   | -1.3 | 1.13E-02 | 13.1   | -1.2 | 2.60E-01 |   |   |
| MRPL34   | 21.1   | 1.0 | 15.9   | -1.3 | 3.50E-03 | 15.2   | -1.4 | 2.41E-02 |   |   |
| TSPAN14  | 7.4    | 1.0 | 5.6    | -1.3 | 3.28E-04 | 8.1    | 1.1  | 6.05E-01 |   |   |
| NME2     | 78.1   | 1.0 | 58.6   | -1.3 | 4.57E-02 | 65.2   | -1.2 | 2.39E-01 |   |   |
| PAIP2B   | 13.1   | 1.0 | 9.8    | -1.3 | 1.72E-02 | 9.5    | -1.4 | 5.97E-01 |   |   |
| DOCK9    | 7.7    | 1.0 | 5.8    | -1.3 | 9.13E-03 | 11.4   | 1.5  | 4.47E-01 |   |   |
| LRDD     | 2.3    | 1.0 | 1.7    | -1.3 | 3.46E-03 | 2.3    | 1.0  | 9.58E-01 |   |   |
| COX7B    | 667.4  | 1.0 | 501.0  | -1.3 | 6.59E-04 | 518.3  | -1.3 | 8.98E-01 |   |   |
| PLEKHJ1  | 8.7    | 1.0 | 6.6    | -1.3 | 7.60E-03 | 7.3    | -1.2 | 6.72E-01 |   |   |
| GSTM4    | 11.6   | 1.0 | 8.7    | -1.3 | 6.18E-04 | 9.4    | -1.2 | 3.72E-01 |   |   |
| TMEM65   | 9.7    | 1.0 | 7.3    | -1.3 | 4.48E-03 | 7.7    | -1.3 | 9.27E-01 |   |   |
| PPAPDC3  | 20.2   | 1.0 | 15.1   | -1.3 | 2.05E-02 | 10.0   | -2.0 | 8.79E-04 |   |   |
| TCEA3    | 23.2   | 1.0 | 17.3   | -1.3 | 1.73E-03 | 17.7   | -1.3 | 7.37E-01 |   |   |
| SLC41A1  | 74.5   | 1.0 | 55.7   | -1.3 | 1.18E-02 | 52.5   | -1.4 | 3.10E-01 |   |   |
| C11orf67 | 30.5   | 1.0 | 22.8   | -1.3 | 3.82E-04 | 26.7   | -1.1 | 4.49E-01 |   |   |
| GCAT     | 11.9   | 1.0 | 8.9    | -1.3 | 2.86E-02 | 8.5    | -1.4 | 4.31E-01 |   |   |
| IFRD2    | 11.0   | 1.0 | 8.2    | -1.3 | 4.67E-04 | 9.5    | -1.2 | 8.07E-01 |   |   |
| LRRC8A   | 9.1    | 1.0 | 6.8    | -1.3 | 4.61E-04 | 18.3   | 2.0  | 1.52E-03 |   |   |
| COX6A2   | 652.6  | 1.0 | 486.0  | -1.3 | 4.71E-03 | 486.5  | -1.3 | 7.97E-01 |   |   |
| PIP5K1B  | 17.1   | 1.0 | 12.7   | -1.3 | 6.66E-03 | 12.8   | -1.3 | 6.54E-01 |   |   |
| NCALD    | 3.4    | 1.0 | 2.5    | -1.3 | 1.80E-02 | 2.9    | -1.2 | 8.71E-01 |   |   |
| GAS2L1   | 5.2    | 1.0 | 3.9    | -1.3 | 1.96E-02 | 7.6    | 1.5  | 3.97E-02 |   |   |
| SERPINB6 | 55.2   | 1.0 | 41.0   | -1.3 | 1.12E-02 | 46.6   | -1.2 | 7.96E-01 |   |   |
| ITPK1    | 20.4   | 1.0 | 15.1   | -1.3 | 9.69E-03 | 18.9   | -1.1 | 4.18E-01 |   |   |
| PPP1R13B | 16.8   | 1.0 | 12.5   | -1.3 | 3.14E-03 | 14.2   | -1.2 | 9.52E-01 |   |   |
| AKTIP    | 19.2   | 1.0 | 14.2   | -1.4 | 5.41E-04 | 19.2   | -1.0 | 4.07E-02 | √ | √ |
| WWP1     | 25.6   | 1.0 | 18.9   | -1.4 | 7.57E-05 | 20.3   | -1.3 | 6.99E-01 |   |   |
| EPN1     | 40.9   | 1.0 | 30.2   | -1.4 | 1.56E-03 | 33.2   | -1.2 | 9.42E-01 |   |   |
| MRPS24   | 47.7   | 1.0 | 35.2   | -1.4 | 1.87E-07 | 38.7   | -1.2 | 8.76E-01 |   |   |
| PRDX6    | 93.3   | 1.0 | 68.7   | -1.4 | 4.92E-03 | 86.6   | -1.1 | 5.34E-01 |   |   |
| NFIL3    | 12.0   | 1.0 | 8.8    | -1.4 | 1.30E-03 | 22.7   | 1.9  | 7.36E-01 |   |   |
| SLC2A4   | 25.7   | 1.0 | 18.9   | -1.4 | 9.16E-03 | 15.8   | -1.6 | 8.46E-02 |   |   |
| ITPKC    | 3.4    | 1.0 | 2.5    | -1.4 | 8.17E-03 | 7.4    | 2.2  | 2.55E-01 |   |   |

|            |       |     |       |      |          |       |      |          |  |  |
|------------|-------|-----|-------|------|----------|-------|------|----------|--|--|
| H1F0       | 35.2  | 1.0 | 25.8  | -1.4 | 1.07E-02 | 24.3  | -1.4 | 1.14E-02 |  |  |
| RHBDF2     | 2.4   | 1.0 | 1.8   | -1.4 | 2.95E-02 | 3.0   | 1.3  | 8.92E-01 |  |  |
| HAND1      | 8.0   | 1.0 | 5.8   | -1.4 | 1.55E-02 | 5.6   | -1.4 | 8.41E-01 |  |  |
| CUTC       | 14.6  | 1.0 | 10.7  | -1.4 | 3.00E-03 | 14.1  | -1.0 | 1.99E-01 |  |  |
| FNDC5      | 14.7  | 1.0 | 10.7  | -1.4 | 8.93E-03 | 11.1  | -1.3 | 8.78E-01 |  |  |
| MRPL41     | 128.1 | 1.0 | 93.4  | -1.4 | 4.18E-04 | 88.4  | -1.4 | 4.68E-01 |  |  |
| NCEH1      | 9.8   | 1.0 | 7.1   | -1.4 | 8.91E-03 | 8.8   | -1.1 | 1.14E-01 |  |  |
| AGTPBP1    | 8.1   | 1.0 | 5.9   | -1.4 | 3.07E-03 | 5.8   | -1.4 | 7.73E-02 |  |  |
| HMBS       | 5.4   | 1.0 | 3.9   | -1.4 | 2.42E-02 | 3.2   | -1.7 | 1.13E-02 |  |  |
| TRMT61B    | 5.2   | 1.0 | 3.8   | -1.4 | 4.06E-03 | 4.2   | -1.2 | 8.05E-01 |  |  |
| SLC4A3     | 89.9  | 1.0 | 65.1  | -1.4 | 5.69E-03 | 62.4  | -1.4 | 6.61E-01 |  |  |
| BID        | 4.4   | 1.0 | 3.2   | -1.4 | 3.03E-02 | 4.9   | 1.1  | 1.41E-01 |  |  |
| NDRG4      | 180.9 | 1.0 | 130.9 | -1.4 | 2.32E-04 | 150.3 | -1.2 | 3.42E-01 |  |  |
| LARP1B     | 4.9   | 1.0 | 3.5   | -1.4 | 3.17E-03 | 4.2   | -1.2 | 8.69E-01 |  |  |
| DSP        | 77.5  | 1.0 | 56.0  | -1.4 | 1.66E-02 | 55.8  | -1.4 | 9.92E-01 |  |  |
| RASGRP2    | 5.9   | 1.0 | 4.3   | -1.4 | 5.15E-03 | 7.0   | 1.2  | 6.31E-01 |  |  |
| C1orf31    | 7.9   | 1.0 | 5.7   | -1.4 | 1.88E-03 | 6.4   | -1.2 | 7.87E-01 |  |  |
| FBLIM1     | 10.7  | 1.0 | 7.8   | -1.4 | 2.82E-02 | 9.1   | -1.2 | 4.74E-01 |  |  |
| GMPR       | 38.3  | 1.0 | 27.6  | -1.4 | 2.71E-04 | 33.0  | -1.2 | 3.06E-01 |  |  |
| ZNF865     | 3.1   | 1.0 | 2.3   | -1.4 | 7.98E-06 | 2.8   | -1.1 | 4.30E-01 |  |  |
| LRSAM1     | 10.1  | 1.0 | 7.3   | -1.4 | 5.43E-05 | 6.9   | -1.5 | 3.86E-02 |  |  |
| CHPT1      | 40.7  | 1.0 | 29.3  | -1.4 | 6.58E-03 | 30.4  | -1.3 | 3.71E-01 |  |  |
| RHOF       | 4.4   | 1.0 | 3.2   | -1.4 | 8.58E-03 | 2.8   | -1.6 | 7.15E-02 |  |  |
| DENND3     | 5.3   | 1.0 | 3.8   | -1.4 | 8.94E-03 | 9.5   | 1.8  | 3.30E-01 |  |  |
| JPH2       | 37.3  | 1.0 | 26.8  | -1.4 | 3.16E-02 | 34.8  | -1.1 | 5.36E-02 |  |  |
| TST        | 16.7  | 1.0 | 12.0  | -1.4 | 7.55E-03 | 12.3  | -1.4 | 3.78E-01 |  |  |
| RAPGEF3    | 4.7   | 1.0 | 3.4   | -1.4 | 1.87E-02 | 6.9   | 1.5  | 6.37E-01 |  |  |
| PARVB      | 26.2  | 1.0 | 18.8  | -1.4 | 1.36E-02 | 20.9  | -1.3 | 6.74E-01 |  |  |
| CITED4     | 4.8   | 1.0 | 3.5   | -1.4 | 1.27E-02 | 3.1   | -1.6 | 1.75E-01 |  |  |
| BCL2L1     | 20.0  | 1.0 | 14.4  | -1.4 | 7.75E-03 | 21.4  | 1.1  | 1.45E-01 |  |  |
| GPD1L      | 72.8  | 1.0 | 52.2  | -1.4 | 1.85E-02 | 40.1  | -1.8 | 1.50E-03 |  |  |
| ASB2       | 46.8  | 1.0 | 33.5  | -1.4 | 4.44E-02 | 21.3  | -2.2 | 2.38E-02 |  |  |
| MAN2A2     | 13.8  | 1.0 | 9.8   | -1.4 | 1.01E-03 | 13.0  | -1.1 | 1.60E-01 |  |  |
| SGK1       | 11.5  | 1.0 | 8.2   | -1.4 | 4.02E-02 | 23.9  | 2.1  | 5.43E-01 |  |  |
| GLUL       | 60.3  | 1.0 | 43.0  | -1.4 | 1.31E-02 | 113.4 | 1.9  | 6.03E-01 |  |  |
| ESRRG      | 5.3   | 1.0 | 3.8   | -1.4 | 2.48E-02 | 4.0   | -1.3 | 7.03E-01 |  |  |
| GPATCH4    | 7.2   | 1.0 | 5.2   | -1.4 | 2.84E-02 | 7.2   | 1.0  | 2.85E-01 |  |  |
| JUP        | 49.7  | 1.0 | 35.4  | -1.4 | 7.09E-04 | 38.9  | -1.3 | 3.56E-01 |  |  |
| TRMU       | 6.2   | 1.0 | 4.4   | -1.4 | 1.53E-05 | 4.6   | -1.4 | 1.19E-01 |  |  |
| SNRNP35    | 14.5  | 1.0 | 10.3  | -1.4 | 2.05E-04 | 11.0  | -1.3 | 5.68E-01 |  |  |
| TMTC1      | 5.7   | 1.0 | 4.0   | -1.4 | 1.57E-04 | 6.4   | 1.1  | 2.28E-01 |  |  |
| FSD2       | 17.3  | 1.0 | 12.2  | -1.4 | 1.88E-02 | 9.0   | -1.9 | 7.68E-02 |  |  |
| KLF9       | 18.3  | 1.0 | 13.0  | -1.4 | 1.27E-02 | 31.7  | 1.7  | 2.24E-02 |  |  |
| LIFR       | 4.8   | 1.0 | 3.4   | -1.4 | 1.23E-02 | 7.1   | 1.5  | 9.11E-02 |  |  |
| OC10012798 | 20.3  | 1.0 | 14.4  | -1.4 | 1.41E-02 | 17.7  | -1.1 | 3.13E-01 |  |  |
| LSS        | 11.8  | 1.0 | 8.3   | -1.4 | 1.39E-02 | 11.5  | -1.0 | 2.12E-01 |  |  |
| CD82       | 10.0  | 1.0 | 7.0   | -1.4 | 4.04E-03 | 8.1   | -1.2 | 3.84E-01 |  |  |
| MRPL48     | 10.5  | 1.0 | 7.4   | -1.4 | 9.29E-05 | 7.7   | -1.4 | 4.46E-01 |  |  |
| HADHB      | 307.8 | 1.0 | 216.6 | -1.4 | 3.51E-04 | 232.1 | -1.3 | 6.88E-01 |  |  |
| IDH2       | 240.9 | 1.0 | 169.2 | -1.4 | 4.02E-04 | 182.9 | -1.3 | 6.03E-01 |  |  |
| SLC1A3     | 21.8  | 1.0 | 15.3  | -1.4 | 4.37E-02 | 27.2  | 1.2  | 1.02E-02 |  |  |
| ZNF784     | 4.4   | 1.0 | 3.1   | -1.4 | 2.21E-04 | 3.7   | -1.2 | 3.06E-01 |  |  |
| OSBPL11    | 3.6   | 1.0 | 2.5   | -1.4 | 2.75E-03 | 4.0   | 1.1  | 2.50E-02 |  |  |
| UBTD1      | 9.1   | 1.0 | 6.4   | -1.4 | 1.05E-03 | 6.1   | -1.5 | 1.16E-01 |  |  |
| AMD1       | 16.4  | 1.0 | 11.5  | -1.4 | 1.75E-03 | 17.4  | 1.1  | 1.29E-01 |  |  |
| AIF1L      | 11.7  | 1.0 | 8.2   | -1.4 | 3.66E-04 | 9.9   | -1.2 | 6.29E-01 |  |  |
| TSPAN13    | 6.8   | 1.0 | 4.8   | -1.4 | 4.15E-03 | 7.0   | 1.0  | 3.66E-01 |  |  |
| SYT7       | 4.7   | 1.0 | 3.3   | -1.4 | 2.20E-02 | 3.2   | -1.5 | 5.40E-01 |  |  |
| MERTK      | 2.3   | 1.0 | 1.6   | -1.4 | 4.61E-02 | 4.0   | 1.7  | 7.00E-01 |  |  |
| C10orf54   | 9.8   | 1.0 | 6.8   | -1.4 | 4.91E-03 | 8.0   | -1.2 | 3.67E-01 |  |  |
| MTHFD2     | 6.7   | 1.0 | 4.7   | -1.4 | 1.73E-02 | 15.6  | 2.3  | 7.61E-01 |  |  |
| PDZRN3     | 24.4  | 1.0 | 16.9  | -1.4 | 2.42E-02 | 16.4  | -1.5 | 2.68E-01 |  |  |
| TCN2       | 7.6   | 1.0 | 5.3   | -1.4 | 2.48E-03 | 7.0   | -1.1 | 2.86E-01 |  |  |
| SEMA6B     | 3.4   | 1.0 | 2.4   | -1.4 | 4.48E-02 | 3.1   | -1.1 | 5.70E-01 |  |  |
| OCIAD2     | 5.4   | 1.0 | 3.7   | -1.4 | 2.50E-03 | 4.5   | -1.2 | 6.94E-01 |  |  |
| PXMP2      | 14.1  | 1.0 | 9.7   | -1.4 | 1.20E-03 | 10.0  | -1.4 | 6.49E-01 |  |  |
| CCBL1      | 4.1   | 1.0 | 2.8   | -1.5 | 3.63E-04 | 3.4   | -1.2 | 3.71E-01 |  |  |
| PFKFB2     | 17.8  | 1.0 | 12.2  | -1.5 | 8.63E-03 | 7.0   | -2.5 | 2.09E-03 |  |  |
| PIM3       | 12.2  | 1.0 | 8.4   | -1.5 | 1.22E-02 | 12.7  | 1.0  | 4.10E-01 |  |  |
| STARD10    | 10.2  | 1.0 | 7.0   | -1.5 | 1.40E-02 | 7.1   | -1.4 | 4.51E-01 |  |  |
| CALCOCO2   | 60.2  | 1.0 | 41.2  | -1.5 | 3.29E-06 | 53.7  | -1.1 | 7.34E-01 |  |  |
| CDC42EP4   | 11.4  | 1.0 | 7.8   | -1.5 | 1.20E-02 | 16.2  | 1.4  | 1.32E-02 |  |  |
| MAP3K6     | 11.2  | 1.0 | 7.7   | -1.5 | 5.71E-03 | 16.7  | 1.5  | 2.19E-02 |  |  |
| MZT2B      | 46.7  | 1.0 | 31.9  | -1.5 | 1.25E-04 | 37.2  | -1.3 | 7.38E-01 |  |  |
| LPCAT3     | 9.8   | 1.0 | 6.7   | -1.5 | 2.08E-02 | 7.5   | -1.3 | 7.45E-01 |  |  |
| PPP1R13L   | 23.5  | 1.0 | 16.0  | -1.5 | 2.25E-04 | 15.1  | -1.6 | 3.86E-01 |  |  |
| CHRAC1     | 4.0   | 1.0 | 2.7   | -1.5 | 1.66E-03 | 3.9   | -1.0 | 2.84E-01 |  |  |
| PID1       | 4.9   | 1.0 | 3.4   | -1.5 | 3.76E-02 | 5.9   | 1.2  | 3.11E-01 |  |  |
| CCDC28B    | 4.3   | 1.0 | 2.9   | -1.5 | 1.21E-02 | 2.7   | -1.6 | 1.14E-01 |  |  |
| CTNNBIP1   | 10.2  | 1.0 | 6.9   | -1.5 | 2.41E-02 | 7.5   | -1.4 | 6.27E-01 |  |  |
| RNF144B    | 2.9   | 1.0 | 2.0   | -1.5 | 1.47E-02 | 2.5   | -1.1 | 5.40E-01 |  |  |
| SLC9A3R2   | 43.6  | 1.0 | 29.5  | -1.5 | 5.28E-04 | 31.9  | -1.4 | 4.95E-01 |  |  |
| TBX3       | 4.6   | 1.0 | 3.1   | -1.5 | 1.04E-02 | 3.9   | -1.2 | 4.84E-01 |  |  |
| GPX3       | 307.2 | 1.0 | 206.8 | -1.5 | 2.80E-03 | 227.5 | -1.4 | 1.29E-01 |  |  |
| TUBB2C     | 153.3 | 1.0 | 103.2 | -1.5 | 1.09E-03 | 104.5 | -1.5 | 3.76E-01 |  |  |
| FAM78A     | 8.0   | 1.0 | 5.4   | -1.5 | 1.28E-02 | 4.3   | -1.9 | 2.48E-03 |  |  |
| SYNE2      | 44.5  | 1.0 | 29.9  | -1.5 | 4.91E-04 | 30.9  | -1.4 | 5.34E-01 |  |  |
| GPR116     | 25.9  | 1.0 | 17.4  | -1.5 | 8.99E-05 | 25.7  | -1.0 | 3.12E-01 |  |  |

|           |        |     |        |      |          |        |      |          |   |   |
|-----------|--------|-----|--------|------|----------|--------|------|----------|---|---|
| C19orf47  | 17.3   | 1.0 | 11.6   | -1.5 | 1.88E-04 | 14.6   | -1.2 | 9.65E-02 |   |   |
| MFSD6     | 5.9    | 1.0 | 4.0    | -1.5 | 9.90E-04 | 5.1    | -1.2 | 7.06E-01 |   |   |
| GPIHBP1   | 6.1    | 1.0 | 4.0    | -1.5 | 1.57E-02 | 7.4    | 1.2  | 2.40E-01 |   |   |
| ProSAPIP1 | 3.9    | 1.0 | 2.6    | -1.5 | 1.21E-05 | 3.3    | -1.2 | 3.54E-01 |   |   |
| SELENBP1  | 24.3   | 1.0 | 16.2   | -1.5 | 1.52E-02 | 18.6   | -1.3 | 7.30E-01 |   |   |
| TEAD2     | 16.3   | 1.0 | 10.8   | -1.5 | 7.01E-04 | 12.9   | -1.3 | 8.16E-01 |   |   |
| PLEKHF1   | 7.8    | 1.0 | 5.2    | -1.5 | 8.09E-03 | 9.8    | 1.3  | 4.36E-02 |   |   |
| IMPA2     | 8.4    | 1.0 | 5.5    | -1.5 | 7.50E-03 | 5.7    | -1.5 | 8.80E-01 |   |   |
| NQO2      | 19.7   | 1.0 | 13.0   | -1.5 | 1.77E-02 | 13.2   | -1.5 | 4.95E-01 |   |   |
| MARK3     | 21.7   | 1.0 | 14.3   | -1.5 | 6.38E-05 | 20.1   | -1.1 | 4.12E-01 |   |   |
| ANK1      | 23.8   | 1.0 | 15.6   | -1.5 | 4.62E-02 | 15.8   | -1.5 | 9.12E-01 |   |   |
| ING2      | 2.9    | 1.0 | 1.9    | -1.5 | 1.25E-02 | 2.3    | -1.2 | 7.01E-01 |   |   |
| SLC26A9   | 5.9    | 1.0 | 3.9    | -1.5 | 9.74E-03 | 4.8    | -1.2 | 4.75E-01 |   |   |
| TPM2      | 348.3  | 1.0 | 227.2  | -1.5 | 7.73E-04 | 272.4  | -1.3 | 5.60E-01 |   |   |
| GPSM1     | 16.0   | 1.0 | 10.5   | -1.5 | 3.24E-02 | 12.5   | -1.3 | 6.52E-01 |   |   |
| CKM       | 1881.3 | 1.0 | 1226.9 | -1.5 | 9.27E-04 | 1154.1 | -1.6 | 2.32E-01 |   |   |
| SLC31A2   | 5.0    | 1.0 | 3.3    | -1.5 | 8.16E-03 | 5.8    | 1.2  | 5.84E-01 |   |   |
| GTF3A     | 68.4   | 1.0 | 44.4   | -1.5 | 1.14E-07 | 50.9   | -1.3 | 5.32E-01 |   |   |
| GALK1     | 3.8    | 1.0 | 2.4    | -1.5 | 3.36E-04 | 2.9    | -1.3 | 6.61E-01 |   |   |
| KY        | 2.4    | 1.0 | 1.6    | -1.5 | 3.65E-02 | 1.3    | -1.9 | 7.67E-02 |   |   |
| PTGDS     | 1058.3 | 1.0 | 682.3  | -1.6 | 4.70E-03 | 786.1  | -1.3 | 9.24E-01 |   |   |
| BCL6      | 19.2   | 1.0 | 12.4   | -1.6 | 2.47E-02 | 25.3   | 1.3  | 6.86E-01 |   |   |
| MRPS25    | 15.8   | 1.0 | 10.1   | -1.6 | 6.00E-04 | 12.8   | -1.2 | 2.19E-01 |   |   |
| CPAMD8    | 4.2    | 1.0 | 2.7    | -1.6 | 1.62E-02 | 3.0    | -1.4 | 8.76E-01 |   |   |
| PDE7A     | 24.0   | 1.0 | 15.4   | -1.6 | 3.88E-04 | 30.1   | 1.3  | 9.86E-03 |   |   |
| ASB10     | 9.5    | 1.0 | 6.1    | -1.6 | 8.06E-04 | 3.9    | -2.5 | 1.15E-03 |   |   |
| OPLAH     | 13.8   | 1.0 | 8.8    | -1.6 | 3.51E-04 | 9.8    | -1.4 | 8.59E-01 |   |   |
| ADCK3     | 79.1   | 1.0 | 50.2   | -1.6 | 9.51E-04 | 62.5   | -1.3 | 2.17E-01 |   |   |
| KIAA0040  | 5.9    | 1.0 | 3.7    | -1.6 | 1.64E-02 | 6.3    | 1.1  | 5.37E-01 |   |   |
| GLTPD1    | 21.4   | 1.0 | 13.5   | -1.6 | 1.34E-05 | 14.7   | -1.5 | 6.53E-01 |   |   |
| C3orf43   | 7.5    | 1.0 | 4.8    | -1.6 | 4.10E-02 | 6.0    | -1.3 | 1.94E-01 |   |   |
| ENDOG     | 13.9   | 1.0 | 8.8    | -1.6 | 5.10E-07 | 8.9    | -1.6 | 9.95E-01 |   |   |
| TESC      | 20.9   | 1.0 | 13.1   | -1.6 | 2.92E-03 | 15.1   | -1.4 | 6.96E-01 |   |   |
| KCNH2     | 24.4   | 1.0 | 15.4   | -1.6 | 1.29E-04 | 17.7   | -1.4 | 2.81E-01 |   |   |
| RGL3      | 4.7    | 1.0 | 3.0    | -1.6 | 4.47E-02 | 3.1    | -1.5 | 5.34E-01 |   |   |
| LOC389333 | 8.7    | 1.0 | 5.4    | -1.6 | 3.13E-03 | 6.1    | -1.4 | 2.47E-01 |   |   |
| CACNA2D3  | 6.3    | 1.0 | 4.0    | -1.6 | 9.29E-03 | 3.0    | -2.1 | 4.50E-02 |   |   |
| ARRDC2    | 4.9    | 1.0 | 3.1    | -1.6 | 3.16E-02 | 11.1   | 2.3  | 1.06E-02 |   |   |
| FAM58A    | 14.6   | 1.0 | 9.2    | -1.6 | 2.53E-05 | 12.0   | -1.2 | 1.71E-01 |   |   |
| HSPB3     | 169.0  | 1.0 | 105.8  | -1.6 | 6.14E-04 | 113.5  | -1.5 | 9.35E-01 |   |   |
| APOBEC2   | 66.8   | 1.0 | 41.8   | -1.6 | 2.51E-04 | 35.4   | -1.9 | 3.08E-01 |   |   |
| ATP2A2    | 510.0  | 1.0 | 318.3  | -1.6 | 4.37E-05 | 349.1  | -1.5 | 7.55E-01 |   |   |
| LPCAT4    | 14.3   | 1.0 | 8.9    | -1.6 | 3.63E-03 | 9.4    | -1.5 | 2.93E-01 |   |   |
| FAM107A   | 27.7   | 1.0 | 17.2   | -1.6 | 3.89E-06 | 28.3   | 1.0  | 5.50E-01 |   |   |
| GPR4      | 3.6    | 1.0 | 2.3    | -1.6 | 6.91E-03 | 3.9    | 1.1  | 7.03E-01 |   |   |
| PTH1R     | 5.4    | 1.0 | 3.3    | -1.6 | 3.07E-03 | 5.1    | -1.1 | 5.05E-01 |   |   |
| PDE4A     | 3.8    | 1.0 | 2.4    | -1.6 | 1.20E-04 | 2.6    | -1.5 | 7.62E-02 |   |   |
| KLHL38    | 21.1   | 1.0 | 13.0   | -1.6 | 9.90E-03 | 10.5   | -2.0 | 2.29E-01 |   |   |
| TPRKB     | 10.8   | 1.0 | 6.7    | -1.6 | 1.23E-04 | 8.3    | -1.3 | 7.40E-01 |   |   |
| FGF7      | 5.1    | 1.0 | 3.2    | -1.6 | 7.46E-03 | 2.5    | -2.0 | 2.33E-02 |   |   |
| PLXNB1    | 8.2    | 1.0 | 5.1    | -1.6 | 4.99E-04 | 7.4    | -1.1 | 9.88E-02 |   |   |
| PTP4A3    | 173.4  | 1.0 | 107.0  | -1.6 | 3.04E-03 | 108.6  | -1.6 | 7.48E-01 |   |   |
| EPB41L4B  | 2.5    | 1.0 | 1.5    | -1.6 | 2.23E-02 | 2.0    | -1.3 | 5.09E-01 |   |   |
| DIRAS1    | 28.9   | 1.0 | 17.8   | -1.6 | 2.15E-03 | 14.6   | -2.0 | 6.38E-02 |   |   |
| AASS      | 5.2    | 1.0 | 3.2    | -1.6 | 6.05E-04 | 4.5    | -1.2 | 6.75E-01 |   |   |
| FAM65C    | 4.6    | 1.0 | 2.8    | -1.6 | 5.26E-03 | 3.0    | -1.5 | 1.27E-01 |   |   |
| COQ10A    | 66.0   | 1.0 | 40.6   | -1.6 | 3.74E-04 | 36.1   | -1.8 | 5.57E-02 |   |   |
| ENTPD6    | 29.8   | 1.0 | 18.3   | -1.6 | 8.08E-05 | 20.3   | -1.5 | 8.93E-01 |   |   |
| TMEM177   | 2.4    | 1.0 | 1.5    | -1.6 | 1.03E-03 | 1.4    | -1.7 | 7.01E-01 |   |   |
| PLIN5     | 14.2   | 1.0 | 8.6    | -1.6 | 5.45E-04 | 7.7    | -1.8 | 5.18E-03 |   |   |
| C1orf168  | 3.1    | 1.0 | 1.9    | -1.6 | 8.73E-03 | 3.2    | 1.0  | 1.99E-01 |   |   |
| GPT       | 13.3   | 1.0 | 7.9    | -1.7 | 6.24E-04 | 7.6    | -1.8 | 5.50E-01 |   |   |
| CEACAM19  | 3.3    | 1.0 | 2.0    | -1.7 | 1.15E-02 | 2.0    | -1.6 | 7.00E-01 |   |   |
| KBTBD10   | 61.2   | 1.0 | 36.4   | -1.7 | 4.12E-03 | 58.5   | -1.0 | 6.32E-02 |   |   |
| SLC2A1    | 8.1    | 1.0 | 4.8    | -1.7 | 8.63E-03 | 6.7    | -1.2 | 1.09E-01 |   |   |
| C1orf183  | 3.1    | 1.0 | 1.8    | -1.7 | 1.73E-03 | 3.8    | 1.2  | 5.02E-02 |   |   |
| LPAR3     | 2.7    | 1.0 | 1.6    | -1.7 | 2.52E-03 | 2.1    | -1.3 | 1.15E-01 |   |   |
| TLR2      | 1.3    | 1.0 | 0.8    | -1.7 | 1.03E-02 | 2.4    | 1.8  | 1.18E-01 |   |   |
| PLCD3     | 11.6   | 1.0 | 6.8    | -1.7 | 3.66E-04 | 7.6    | -1.5 | 5.00E-01 |   |   |
| SLC29A2   | 5.6    | 1.0 | 3.3    | -1.7 | 6.19E-07 | 5.7    | 1.0  | 6.16E-03 | √ | √ |
| COMTD1    | 8.3    | 1.0 | 4.8    | -1.7 | 4.25E-04 | 5.7    | -1.4 | 5.57E-01 |   |   |
| EDNRB     | 10.7   | 1.0 | 6.2    | -1.7 | 1.09E-03 | 10.2   | -1.0 | 7.50E-01 |   |   |
| CCDC69    | 28.4   | 1.0 | 16.5   | -1.7 | 1.22E-04 | 17.8   | -1.6 | 4.53E-01 |   |   |
| C3        | 44.8   | 1.0 | 26.1   | -1.7 | 4.34E-02 | 52.7   | 1.2  | 2.95E-01 |   |   |
| ACCN3     | 2.9    | 1.0 | 1.7    | -1.7 | 6.04E-04 | 2.1    | -1.4 | 2.48E-01 |   |   |
| PYGM      | 26.0   | 1.0 | 15.1   | -1.7 | 1.05E-04 | 19.4   | -1.3 | 1.60E-01 |   |   |
| ACSS1     | 32.2   | 1.0 | 18.6   | -1.7 | 1.86E-03 | 21.1   | -1.5 | 6.28E-01 |   |   |
| PALLD     | 148.5  | 1.0 | 85.6   | -1.7 | 6.62E-04 | 129.1  | -1.2 | 2.52E-02 |   | √ |
| PGAM2     | 256.2  | 1.0 | 147.5  | -1.7 | 9.13E-06 | 162.3  | -1.6 | 5.55E-01 |   |   |
| TUBA1C    | 15.2   | 1.0 | 8.7    | -1.7 | 1.54E-02 | 13.3   | -1.1 | 8.28E-01 |   |   |
| ANXA3     | 21.7   | 1.0 | 12.4   | -1.7 | 1.03E-03 | 15.0   | -1.4 | 6.79E-01 |   |   |
| ASIP      | 5.1    | 1.0 | 2.9    | -1.7 | 6.20E-03 | 4.5    | -1.1 | 1.43E-01 |   |   |
| LYVE1     | 14.9   | 1.0 | 8.5    | -1.8 | 3.36E-02 | 12.9   | -1.2 | 6.18E-01 |   |   |
| PTDSS1    | 57.3   | 1.0 | 32.6   | -1.8 | 6.47E-05 | 38.2   | -1.5 | 5.17E-01 |   |   |
| WDR62     | 3.7    | 1.0 | 2.1    | -1.8 | 1.08E-02 | 3.3    | -1.1 | 2.35E-02 |   | √ |
| DUSP13    | 6.6    | 1.0 | 3.7    | -1.8 | 3.51E-03 | 5.5    | -1.2 | 2.20E-01 |   |   |
| HMOX2     | 35.6   | 1.0 | 20.0   | -1.8 | 1.77E-05 | 23.5   | -1.5 | 3.93E-01 |   |   |
| SMYD1     | 80.5   | 1.0 | 45.3   | -1.8 | 2.11E-05 | 43.6   | -1.8 | 7.34E-01 |   |   |

|            |       |     |       |      |          |       |      |          |   |   |
|------------|-------|-----|-------|------|----------|-------|------|----------|---|---|
| C15orf59   | 14.5  | 1.0 | 8.1   | -1.8 | 1.53E-02 | 9.0   | -1.6 | 3.49E-01 |   |   |
| GPR133     | 12.9  | 1.0 | 7.2   | -1.8 | 1.11E-03 | 10.0  | -1.3 | 3.14E-02 |   | v |
| GALNTL2    | 4.3   | 1.0 | 2.4   | -1.8 | 3.64E-02 | 6.3   | 1.5  | 6.76E-01 |   |   |
| HOGA1      | 7.1   | 1.0 | 3.9   | -1.8 | 1.84E-02 | 4.9   | -1.4 | 4.44E-01 |   |   |
| RASL10B    | 6.4   | 1.0 | 3.5   | -1.8 | 1.16E-02 | 3.6   | -1.8 | 3.25E-01 |   |   |
| KCND3      | 4.0   | 1.0 | 2.2   | -1.8 | 9.63E-04 | 3.1   | -1.3 | 1.30E-01 |   |   |
| GPR17      | 6.9   | 1.0 | 3.8   | -1.8 | 5.81E-04 | 4.3   | -1.6 | 9.88E-01 |   |   |
| FIGF       | 7.5   | 1.0 | 4.1   | -1.8 | 3.21E-02 | 4.3   | -1.7 | 6.56E-01 |   |   |
| OC10013119 | 7.7   | 1.0 | 4.2   | -1.8 | 2.35E-03 | 5.8   | -1.3 | 1.88E-01 |   |   |
| HIST1H1C   | 43.2  | 1.0 | 23.5  | -1.8 | 1.99E-03 | 24.7  | -1.7 | 9.22E-01 |   |   |
| HIF3A      | 19.3  | 1.0 | 10.5  | -1.8 | 2.97E-04 | 18.2  | -1.1 | 1.38E-01 |   |   |
| KCNJ11     | 3.3   | 1.0 | 1.7   | -1.9 | 3.61E-04 | 2.3   | -1.4 | 7.91E-02 |   |   |
| CRISPLD2   | 7.3   | 1.0 | 3.9   | -1.9 | 4.78E-03 | 13.9  | 1.9  | 5.01E-01 |   |   |
| PPP1R1A    | 27.1  | 1.0 | 14.4  | -1.9 | 3.06E-02 | 17.4  | -1.6 | 8.86E-01 |   |   |
| CSDC2      | 91.6  | 1.0 | 48.4  | -1.9 | 6.16E-04 | 92.5  | 1.0  | 2.30E-02 | v | v |
| MPP3       | 8.9   | 1.0 | 4.7   | -1.9 | 2.76E-04 | 10.6  | 1.2  | 1.15E-01 |   |   |
| LRRC14B    | 17.1  | 1.0 | 9.0   | -1.9 | 1.79E-02 | 5.9   | -2.9 | 1.50E-01 |   |   |
| SHISA4     | 43.9  | 1.0 | 23.1  | -1.9 | 3.01E-03 | 36.9  | -1.2 | 6.16E-02 |   |   |
| CREB3L1    | 11.1  | 1.0 | 5.8   | -1.9 | 1.09E-05 | 6.5   | -1.7 | 9.72E-01 |   |   |
| ADRB1      | 7.5   | 1.0 | 3.9   | -1.9 | 1.24E-02 | 3.6   | -2.1 | 9.55E-01 |   |   |
| TUBA8      | 54.2  | 1.0 | 28.0  | -1.9 | 8.77E-03 | 22.2  | -2.4 | 4.28E-02 |   |   |
| MID1IP1    | 9.2   | 1.0 | 4.7   | -2.0 | 1.03E-02 | 5.0   | -1.8 | 1.73E-01 |   |   |
| ZNF703     | 2.6   | 1.0 | 1.3   | -2.0 | 5.24E-04 | 3.1   | 1.2  | 2.33E-02 |   |   |
| SLCSA1     | 38.3  | 1.0 | 19.2  | -2.0 | 2.75E-04 | 25.6  | -1.5 | 5.63E-02 |   |   |
| BIRC3      | 2.5   | 1.0 | 1.3   | -2.0 | 6.28E-04 | 2.5   | -1.0 | 5.03E-01 |   |   |
| SH3RF2     | 74.4  | 1.0 | 36.8  | -2.0 | 8.34E-04 | 43.3  | -1.7 | 5.32E-01 |   |   |
| EIF4EBP1   | 11.9  | 1.0 | 5.9   | -2.0 | 3.92E-04 | 6.9   | -1.7 | 4.55E-01 |   |   |
| PLIN2      | 32.7  | 1.0 | 16.1  | -2.0 | 4.82E-02 | 43.1  | 1.3  | 5.96E-01 |   |   |
| ART3       | 39.5  | 1.0 | 19.1  | -2.1 | 3.97E-05 | 21.7  | -1.8 | 8.70E-01 |   |   |
| PPL        | 3.1   | 1.0 | 1.5   | -2.1 | 2.00E-04 | 2.3   | -1.4 | 2.48E-01 |   |   |
| KLF15      | 15.3  | 1.0 | 7.3   | -2.1 | 7.00E-04 | 21.9  | 1.4  | 9.55E-03 |   |   |
| GADD45B    | 17.8  | 1.0 | 8.5   | -2.1 | 2.25E-02 | 52.6  | 3.0  | 7.90E-01 |   |   |
| MZT2A      | 35.9  | 1.0 | 17.1  | -2.1 | 6.15E-05 | 21.3  | -1.7 | 3.48E-01 |   |   |
| MTUS2      | 30.1  | 1.0 | 14.2  | -2.1 | 9.71E-05 | 18.1  | -1.7 | 6.69E-02 |   |   |
| GRB14      | 4.6   | 1.0 | 2.2   | -2.1 | 2.46E-03 | 2.3   | -2.1 | 9.03E-01 |   |   |
| LMAN1L     | 1.9   | 1.0 | 0.9   | -2.1 | 3.51E-02 | 1.1   | -1.7 | 3.17E-01 |   |   |
| C13orf15   | 27.8  | 1.0 | 13.0  | -2.1 | 1.02E-04 | 41.0  | 1.5  | 5.31E-03 |   |   |
| CADPS2     | 2.8   | 1.0 | 1.3   | -2.2 | 1.53E-03 | 1.8   | -1.5 | 5.52E-01 |   |   |
| ADAMTS9    | 4.4   | 1.0 | 2.0   | -2.2 | 1.18E-02 | 3.1   | -1.4 | 5.89E-01 |   |   |
| SMTNL2     | 6.0   | 1.0 | 2.7   | -2.2 | 1.50E-03 | 1.8   | -3.4 | 4.03E-02 |   |   |
| C19orf33   | 3.0   | 1.0 | 1.4   | -2.2 | 2.15E-02 | 1.0   | -2.9 | 1.86E-01 |   |   |
| C1orf51    | 3.0   | 1.0 | 1.3   | -2.3 | 1.91E-02 | 3.8   | 1.3  | 1.20E-01 |   |   |
| PNMT       | 2.9   | 1.0 | 1.3   | -2.3 | 1.64E-02 | 4.0   | 1.4  | 1.15E-04 |   |   |
| KCNIP2     | 69.8  | 1.0 | 29.4  | -2.4 | 2.72E-02 | 36.0  | -1.9 | 5.18E-01 |   |   |
| ADAMTS15   | 5.4   | 1.0 | 2.2   | -2.4 | 2.32E-03 | 3.6   | -1.5 | 4.04E-01 |   |   |
| CPLX3      | 3.3   | 1.0 | 1.3   | -2.5 | 7.02E-03 | 1.4   | -2.4 | 8.48E-01 |   |   |
| FKBP5      | 42.9  | 1.0 | 16.8  | -2.5 | 9.39E-05 | 126.6 | 3.0  | 4.27E-03 |   |   |
| FAM155B    | 9.1   | 1.0 | 3.6   | -2.6 | 1.48E-03 | 9.8   | 1.1  | 9.34E-03 | v | v |
| FCN3       | 10.0  | 1.0 | 3.9   | -2.6 | 1.17E-02 | 2.9   | -3.4 | 3.00E-01 |   |   |
| METTL7B    | 7.6   | 1.0 | 2.9   | -2.6 | 4.69E-03 | 6.8   | -1.1 | 2.45E-01 |   |   |
| CD163      | 18.2  | 1.0 | 6.9   | -2.6 | 9.32E-03 | 26.5  | 1.5  | 4.56E-01 |   |   |
| ANPEP      | 2.3   | 1.0 | 0.9   | -2.7 | 7.24E-03 | 2.1   | -1.1 | 7.17E-01 |   |   |
| ADAM11     | 3.6   | 1.0 | 1.3   | -2.7 | 7.19E-04 | 1.8   | -1.9 | 2.67E-01 |   |   |
| PVRL1      | 4.4   | 1.0 | 1.6   | -2.7 | 2.90E-03 | 1.9   | -2.3 | 6.99E-01 |   |   |
| S1PR3      | 9.2   | 1.0 | 3.4   | -2.7 | 9.83E-04 | 5.8   | -1.6 | 3.88E-02 |   | v |
| MT1X       | 39.5  | 1.0 | 14.5  | -2.7 | 4.06E-02 | 79.9  | 2.0  | 7.79E-01 |   |   |
| MBNL3      | 1.8   | 1.0 | 0.6   | -2.8 | 1.14E-02 | 1.6   | -1.1 | 1.20E-01 |   |   |
| MYL7       | 526.1 | 1.0 | 179.5 | -2.9 | 2.47E-02 | 321.9 | -1.6 | 2.64E-01 |   |   |
| CHST9      | 2.9   | 1.0 | 1.0   | -2.9 | 5.27E-04 | 1.1   | -2.7 | 9.71E-01 |   |   |
| ZFP57      | 5.1   | 1.0 | 1.7   | -3.0 | 3.76E-02 | 2.1   | -2.5 | 7.39E-01 |   |   |
| AGXT2L1    | 3.8   | 1.0 | 1.2   | -3.0 | 2.04E-02 | 1.3   | -3.0 | 8.84E-01 |   |   |
| AQP3       | 8.7   | 1.0 | 2.9   | -3.1 | 4.69E-03 | 5.1   | -1.7 | 8.81E-01 |   |   |
| NPTX2      | 3.9   | 1.0 | 1.3   | -3.1 | 5.54E-03 | 2.3   | -1.7 | 3.04E-01 |   |   |
| CYP4B1     | 11.9  | 1.0 | 3.8   | -3.2 | 1.42E-03 | 15.5  | 1.3  | 4.73E-02 |   |   |
| FAM46B     | 8.6   | 1.0 | 2.6   | -3.3 | 4.91E-04 | 7.2   | -1.2 | 1.75E-03 |   | v |
| ADAMTS4    | 5.8   | 1.0 | 1.7   | -3.4 | 4.01E-02 | 8.3   | 1.4  | 6.24E-01 |   |   |
| EPN3       | 3.2   | 1.0 | 0.9   | -3.5 | 8.76E-04 | 1.1   | -3.0 | 5.36E-01 |   |   |
| LRRN3      | 2.2   | 1.0 | 0.6   | -3.7 | 2.10E-02 | 0.9   | -2.6 | 7.43E-01 |   |   |
| SGPP2      | 5.2   | 1.0 | 1.4   | -3.8 | 1.64E-03 | 2.9   | -1.8 | 1.46E-01 |   |   |
| PRODH      | 13.5  | 1.0 | 3.5   | -3.9 | 9.15E-04 | 3.5   | -3.8 | 2.73E-01 |   |   |
| BMP7       | 2.3   | 1.0 | 0.6   | -3.9 | 4.50E-04 | 0.8   | -2.7 | 7.06E-01 |   |   |
| LCN10      | 3.2   | 1.0 | 0.8   | -4.0 | 2.80E-04 | 2.7   | -1.2 | 9.26E-02 |   |   |
| SLCO4A1    | 7.7   | 1.0 | 1.8   | -4.2 | 8.25E-06 | 7.3   | -1.0 | 5.23E-01 |   |   |
| SERPINA3   | 29.0  | 1.0 | 6.4   | -4.5 | 3.52E-03 | 15.0  | -1.9 | 6.63E-01 |   |   |
| LCN6       | 5.9   | 1.0 | 1.3   | -4.5 | 1.09E-04 | 3.5   | -1.7 | 2.52E-01 |   |   |
| HOPX       | 12.4  | 1.0 | 2.7   | -4.6 | 2.18E-02 | 5.8   | -2.1 | 5.87E-02 |   |   |
| DLK1       | 9.4   | 1.0 | 2.0   | -4.7 | 7.61E-03 | 7.6   | -1.2 | 2.18E-01 |   |   |
| AQP4       | 2.6   | 1.0 | 0.5   | -5.1 | 1.59E-04 | 0.9   | -2.9 | 5.22E-02 |   |   |
| IL1RL1     | 2.0   | 1.0 | 0.4   | -5.5 | 2.60E-02 | 2.8   | 1.4  | 1.07E-01 |   |   |
| TUBA3D     | 30.8  | 1.0 | 4.9   | -6.3 | 3.21E-05 | 31.3  | 1.0  | 2.62E-03 | v | v |
| TUBA3E     | 24.8  | 1.0 | 3.8   | -6.5 | 1.07E-04 | 21.8  | -1.1 | 3.91E-03 |   | v |
| MYH6       | 522.6 | 1.0 | 78.5  | -6.7 | 6.18E-04 | 95.7  | -5.5 | 3.97E-01 |   |   |
| CA14       | 3.7   | 1.0 | 0.5   | -7.2 | 2.79E-04 | 1.0   | -3.8 | 2.69E-01 |   |   |
| DHRS7C     | 14.0  | 1.0 | 1.6   | -8.9 | 7.94E-03 | 5.0   | -2.8 | 2.42E-02 |   | v |

**Supplemental Table S13. mRNAs abnormally expressed with heart failure but normalized\* with LVAD support**

| mRNA         | NF<br>(RPKM+0.1) | ICM pre-LVAD |          | ICM post-LVAD |                      |
|--------------|------------------|--------------|----------|---------------|----------------------|
|              |                  | Fold Change  | P Value  | Fold Change   | P Value <sup>†</sup> |
| RBP4         | 0.5              | 5.1          | 3.89E-03 | -1.0          | 1.15E-02             |
| TUSC5        | 0.3              | 3.6          | 8.96E-03 | 1.1           | 2.11E-02             |
| LMO2         | 2.4              | 1.7          | 4.00E-02 | -1.1          | 2.43E-02             |
| FAM102A      | 3.0              | 1.7          | 9.20E-04 | 1.1           | 1.75E-02             |
| IRX3         | 9.6              | 1.7          | 4.30E-02 | -1.0          | 1.93E-02             |
| VAMP1        | 2.3              | 1.6          | 1.92E-02 | 1.0           | 2.40E-02             |
| MUTED-TXNDC5 | 1.2              | 1.6          | 4.85E-02 | -1.1          | 3.76E-03             |
| NAB2         | 2.8              | 1.6          | 3.93E-03 | 1.0           | 2.34E-02             |
| TCTN1        | 2.7              | 1.5          | 3.07E-02 | 1.0           | 3.84E-02             |
| CHRNA1       | 1.6              | 1.5          | 1.31E-02 | 1.0           | 1.72E-02             |
| GAB3         | 4.5              | 1.5          | 5.14E-03 | 1.1           | 1.22E-02             |
| MED31        | 1.6              | 1.5          | 9.60E-04 | 1.1           | 1.66E-03             |
| SIK2         | 4.7              | 1.5          | 3.03E-03 | 1.0           | 2.52E-03             |
| KLHL13       | 2.5              | 1.5          | 8.20E-03 | 1.1           | 7.58E-04             |
| MOSC1        | 2.5              | 1.5          | 4.36E-02 | 1.1           | 2.96E-02             |
| ZNF467       | 1.6              | 1.5          | 2.95E-02 | -1.0          | 2.44E-02             |
| SORBS2       | 130.3            | 1.5          | 1.08E-02 | 1.1           | 3.88E-02             |
| ABCA3        | 1.9              | 1.5          | 2.19E-03 | 1.1           | 3.62E-02             |
| SRXN1        | 2.3              | 1.5          | 2.46E-03 | -1.0          | 1.72E-02             |
| PKD1         | 11.1             | 1.4          | 1.70E-03 | 1.1           | 4.73E-02             |
| C10orf57     | 2.3              | 1.4          | 2.52E-03 | 1.0           | 4.51E-03             |
| FAM69A       | 1.6              | 1.4          | 4.08E-02 | -1.0          | 3.87E-02             |
| SLC1A4       | 2.1              | 1.4          | 4.55E-02 | -1.0          | 1.50E-02             |
| C17orf59     | 2.8              | 1.4          | 2.94E-03 | 1.0           | 2.65E-03             |
| C2CD2L       | 2.3              | 1.4          | 2.82E-06 | 1.0           | 1.51E-03             |
| NAAA         | 3.0              | 1.4          | 6.49E-03 | 1.0           | 9.60E-03             |
| PDE3B        | 1.7              | 1.4          | 3.87E-03 | 1.0           | 7.28E-03             |
| PHF15        | 3.3              | 1.4          | 3.24E-03 | -1.0          | 3.72E-02             |
| GLS          | 4.9              | 1.4          | 2.34E-03 | 1.0           | 4.17E-02             |
| TDRD7        | 2.2              | 1.4          | 3.32E-03 | 1.0           | 1.12E-02             |
| GPRC5C       | 5.1              | 1.4          | 2.01E-03 | 1.0           | 1.72E-03             |
| HIVEP2       | 3.1              | 1.4          | 1.91E-02 | 1.0           | 1.62E-02             |
| CDKN2AIP     | 3.1              | 1.4          | 1.79E-03 | 1.0           | 7.52E-03             |
| CLUAP1       | 4.4              | 1.4          | 1.28E-03 | 1.0           | 4.46E-03             |
| MNT          | 1.7              | 1.4          | 1.60E-02 | -1.0          | 3.27E-02             |
| HSD17B12     | 13.5             | 1.4          | 2.17E-02 | 1.0           | 8.59E-03             |
| PPT2         | 5.7              | 1.4          | 2.39E-04 | 1.0           | 2.19E-03             |
| PIK3C2B      | 2.7              | 1.4          | 2.70E-02 | -1.1          | 2.78E-02             |
| NTN4         | 20.3             | 1.3          | 4.70E-03 | -1.1          | 5.95E-03             |
| BCOR         | 3.3              | 1.3          | 3.46E-03 | -1.0          | 6.98E-03             |
| TMEM127      | 17.4             | 1.3          | 1.38E-03 | -1.1          | 1.66E-03             |
| ADAR         | 11.9             | 1.3          | 3.18E-02 | -1.1          | 4.80E-02             |

|          |       |      |          |      |          |
|----------|-------|------|----------|------|----------|
| ORAI3    | 2.5   | 1.3  | 4.44E-02 | -1.0 | 1.19E-02 |
| NCAPD2   | 2.5   | 1.3  | 9.55E-03 | -1.0 | 1.90E-02 |
| NPTXR    | 3.0   | 1.3  | 2.71E-02 | -1.1 | 4.43E-03 |
| ZFP90    | 1.8   | 1.3  | 9.51E-03 | -1.1 | 2.28E-02 |
| DNASE2   | 4.6   | 1.3  | 3.17E-02 | -1.1 | 2.47E-02 |
| SYNPO    | 122.6 | 1.3  | 4.26E-03 | -1.0 | 3.73E-02 |
| PAM      | 126.8 | 1.3  | 1.54E-02 | -1.1 | 5.49E-03 |
| PIGT     | 42.0  | 1.3  | 1.15E-02 | -1.1 | 1.59E-03 |
| ATP2B1   | 1.7   | 1.3  | 3.98E-02 | -1.1 | 4.68E-02 |
| C12orf49 | 1.7   | 1.3  | 3.09E-02 | -1.0 | 4.17E-02 |
| YIPF5    | 3.6   | 1.3  | 1.21E-02 | -1.1 | 2.62E-02 |
| VPS33A   | 2.4   | 1.3  | 3.43E-03 | -1.1 | 1.08E-03 |
| ATP9A    | 4.8   | 1.3  | 1.09E-02 | -1.1 | 7.05E-04 |
| TOB1     | 13.2  | 1.3  | 4.98E-03 | -1.1 | 2.38E-02 |
| SRSF8    | 3.3   | 1.3  | 1.01E-02 | -1.1 | 6.35E-03 |
| C9orf125 | 10.8  | 1.3  | 1.29E-02 | -1.1 | 1.25E-02 |
| TAPBP    | 8.9   | 1.2  | 1.69E-02 | -1.1 | 1.26E-02 |
| GRN      | 35.2  | 1.2  | 4.24E-02 | -1.1 | 3.62E-02 |
| MTUS1    | 39.1  | -1.3 | 1.22E-02 | 1.0  | 7.09E-03 |
| C11orf67 | 30.5  | -1.3 | 1.11E-02 | -1.0 | 4.15E-02 |
| CBFA2T3  | 3.1   | -1.3 | 8.53E-03 | 1.0  | 2.00E-02 |
| C1orf183 | 3.1   | -1.4 | 3.82E-02 | 1.0  | 5.19E-03 |
| COL27A1  | 4.1   | -1.5 | 1.39E-02 | -1.1 | 3.76E-02 |
| LIFR     | 4.8   | -1.5 | 1.46E-02 | 1.0  | 3.74E-02 |
| SLC25A30 | 29.6  | -1.5 | 2.66E-02 | 1.0  | 2.85E-02 |
| MYL7     | 526.1 | -2.9 | 2.06E-02 | -1.1 | 1.45E-03 |

| mRNA      | NF<br>(PMMR+0.1) | NICM pre-LVAD |          | NICM post-LVAD |                      |
|-----------|------------------|---------------|----------|----------------|----------------------|
|           |                  | Fold Change   | P Value  | Fold Change    | P Value <sup>†</sup> |
| SCN2B     | 3.3              | 2.4           | 2.62E-05 | 1.0            | 6.36E-04             |
| BMP6      | 1.1              | 2.1           | 1.71E-02 | -1.0           | 2.40E-02             |
| SELP      | 1.3              | 1.9           | 7.15E-03 | 1.1            | 1.13E-02             |
| LTC4S     | 1.3              | 1.8           | 9.36E-03 | 1.1            | 1.78E-02             |
| C20orf26  | 5.4              | 1.8           | 5.25E-04 | -1.1           | 8.40E-04             |
| NAP1L2    | 2.5              | 1.7           | 1.69E-03 | -1.0           | 1.31E-03             |
| VEGFC     | 1.8              | 1.7           | 1.11E-02 | 1.1            | 8.11E-03             |
| MYOCD     | 4.1              | 1.7           | 1.51E-03 | 1.1            | 4.67E-03             |
| C22orf25  | 8.0              | 1.6           | 4.50E-04 | 1.1            | 5.16E-03             |
| TMEM231   | 1.9              | 1.6           | 6.73E-04 | 1.1            | 3.51E-03             |
| C9orf9    | 1.9              | 1.6           | 1.68E-02 | -1.1           | 5.92E-03             |
| NAV1      | 8.2              | 1.6           | 4.67E-03 | 1.0            | 2.94E-03             |
| TGFBI     | 13.8             | 1.6           | 1.12E-03 | 1.0            | 1.52E-02             |
| AR        | 2.8              | 1.6           | 1.49E-03 | -1.0           | 1.25E-02             |
| KLHL13    | 2.5              | 1.5           | 1.66E-02 | -1.1           | 7.11E-03             |
| C14orf128 | 2.4              | 1.5           | 8.53E-05 | 1.0            | 1.23E-02             |
| NHSL1     | 4.6              | 1.5           | 1.59E-03 | -1.1           | 1.08E-04             |
| NRIP2     | 1.3              | 1.5           | 1.56E-02 | -1.1           | 6.48E-03             |

|          |      |      |          |      |          |
|----------|------|------|----------|------|----------|
| HSPA4L   | 2.4  | 1.5  | 5.58E-04 | 1.0  | 1.88E-03 |
| GPRASP2  | 3.0  | 1.5  | 1.28E-03 | 1.1  | 1.47E-03 |
| ANGPTL2  | 9.3  | 1.5  | 9.99E-03 | -1.1 | 2.90E-04 |
| ZNF415   | 4.2  | 1.5  | 1.10E-03 | 1.1  | 1.28E-02 |
| SEMA5B   | 1.4  | 1.4  | 1.77E-02 | -1.1 | 4.32E-02 |
| CCDC141  | 8.5  | 1.4  | 9.43E-03 | 1.0  | 2.62E-02 |
| GLRX     | 24.6 | 1.4  | 1.28E-03 | 1.0  | 2.75E-03 |
| TRIM45   | 3.0  | 1.4  | 3.29E-02 | -1.1 | 7.87E-03 |
| WDR31    | 3.7  | 1.4  | 3.48E-02 | -1.1 | 1.45E-03 |
| FAM110B  | 4.2  | 1.4  | 4.07E-03 | -1.0 | 2.90E-04 |
| LEPROTL1 | 10.2 | 1.4  | 2.29E-03 | -1.1 | 3.60E-03 |
| NTN4     | 20.3 | 1.3  | 5.96E-03 | -1.0 | 2.34E-03 |
| DPCD     | 7.3  | 1.3  | 6.83E-03 | -1.1 | 1.19E-02 |
| SRXN1    | 2.3  | 1.3  | 1.92E-03 | -1.1 | 6.64E-04 |
| PIGT     | 42.0 | 1.3  | 2.75E-02 | -1.1 | 3.17E-03 |
| RAB7L1   | 2.3  | 1.3  | 2.25E-02 | -1.0 | 7.15E-03 |
| DOLK     | 2.6  | 1.3  | 6.88E-03 | -1.1 | 1.84E-03 |
| ARMCX6   | 7.9  | 1.2  | 3.22E-02 | -1.1 | 2.39E-03 |
| NPTXR    | 3.0  | 1.2  | 3.07E-02 | -1.1 | 3.45E-03 |
| GLRX2    | 7.0  | -1.3 | 1.46E-02 | 1.1  | 4.97E-02 |
| SSR3     | 20.8 | -1.3 | 3.59E-03 | 1.1  | 4.97E-02 |
| SLC7A6   | 14.3 | -1.3 | 7.48E-03 | 1.1  | 4.26E-02 |
| AKTIP    | 19.2 | -1.4 | 5.41E-04 | -1.0 | 4.07E-02 |
| SLC29A2  | 5.6  | -1.7 | 6.19E-07 | 1.0  | 6.16E-03 |
| CSDC2    | 91.6 | -1.9 | 6.16E-04 | 1.0  | 2.30E-02 |
| FAM155B  | 9.1  | -2.6 | 1.48E-03 | 1.1  | 9.34E-03 |
| TUBA3D   | 30.8 | -6.3 | 3.21E-05 | 1.0  | 2.62E-03 |

---

\*Abnormal expression: > 1.2 fold change comparing to NF mean; normalization: normalized expression level to < 1.1 fold different from NF mean.

†Paired sample Wilcoxon signed rank test between ICM/NICM samples before and after LVAD support.



Table S14. Mean normalized read counts, fold change (compared to NF hearts mean value) and P values of lncRNAs that are differentially expressed in ICM LV samples

| Transcript     | NF mean (RPKM+0.1) | Fold Change (vs NF) | ICM pre-LVAD mean (RPKM+0.1) | Fold Change (vs NF) | P value (NF vs ICM) | ICM post-LVAD mean (RPKM+0.1) | Fold Change (vs NF) | P value (ICM pre vs post LVAD) | Normalized by LVAD | Improved by LVAD |
|----------------|--------------------|---------------------|------------------------------|---------------------|---------------------|-------------------------------|---------------------|--------------------------------|--------------------|------------------|
| n333955        | 0.3                | 1.0                 | 13.8                         | 43.6                | 1.93E-04            | 11.2                          | 35.4                | 6.18E-01                       |                    |                  |
| n337373        | 0.3                | 1.0                 | 8.2                          | 31.3                | 4.69E-04            | 7.6                           | 29.0                | 8.68E-01                       |                    |                  |
| n377672        | 0.1                | 1.0                 | 1.5                          | 26.5                | 4.41E-02            | 1.0                           | 18.8                | 5.80E-01                       |                    |                  |
| n411026        | 0.0                | 1.0                 | 0.5                          | 9.3                 | 4.91E-02            | 0.1                           | 2.4                 | 1.26E-01                       |                    |                  |
| n339730        | 0.1                | 1.0                 | 1.1                          | 9.0                 | 1.59E-03            | 0.1                           | -1.0                | 4.88E-03                       | √                  | √                |
| n384866        | 0.1                | 1.0                 | 0.6                          | 8.5                 | 1.08E-02            | 0.7                           | 10.0                | 7.45E-01                       |                    |                  |
| n332777        | 0.2                | 1.0                 | 1.2                          | 7.4                 | 4.51E-03            | 0.4                           | 2.1                 | 5.69E-02                       |                    |                  |
| TCONS_00025161 | 0.3                | 1.0                 | 2.0                          | 7.0                 | 1.57E-02            | 1.3                           | 4.7                 | 4.45E-01                       |                    |                  |
| TCONS_00004738 | 0.1                | 1.0                 | 0.5                          | 6.9                 | 2.38E-02            | 0.0                           | -5.8                | 2.29E-02                       |                    |                  |
| n333422        | 0.1                | 1.0                 | 0.4                          | 6.4                 | 4.61E-02            | 0.3                           | 5.4                 | 7.42E-01                       |                    |                  |
| n379534        | 0.1                | 1.0                 | 0.5                          | 5.0                 | 1.94E-02            | 0.3                           | 2.8                 | 1.84E-01                       |                    |                  |
| n410031        | 0.1                | 1.0                 | 0.6                          | 4.8                 | 6.37E-04            | 0.3                           | 2.6                 | 1.52E-01                       |                    |                  |
| n341462        | 0.3                | 1.0                 | 1.4                          | 4.8                 | 7.47E-04            | 1.5                           | 5.2                 | 8.44E-01                       |                    |                  |
| TCONS_00017062 | 0.1                | 1.0                 | 0.6                          | 4.6                 | 2.30E-02            | 0.2                           | 1.2                 | 4.30E-02                       |                    | √                |
| n341553        | 0.6                | 1.0                 | 2.6                          | 4.2                 | 1.37E-02            | 1.4                           | 2.3                 | 7.33E-02                       |                    |                  |
| TCONS_00006930 | 1.8                | 1.0                 | 7.6                          | 4.1                 | 2.55E-02            | 8.2                           | 4.4                 | 8.69E-01                       |                    |                  |
| TCONS_00017979 | 0.2                | 1.0                 | 0.8                          | 3.7                 | 5.88E-03            | 0.2                           | -1.4                | 5.67E-03                       |                    |                  |
| n378288        | 0.4                | 1.0                 | 1.6                          | 3.6                 | 2.96E-03            | 0.7                           | 1.6                 | 4.24E-02                       |                    | √                |
| TCONS_00020932 | 0.2                | 1.0                 | 0.8                          | 3.5                 | 7.19E-04            | 0.4                           | 1.7                 | 5.97E-02                       |                    |                  |
| n406496        | 0.3                | 1.0                 | 1.2                          | 3.5                 | 7.88E-04            | 1.0                           | 3.0                 | 6.15E-01                       |                    |                  |
| n407157        | 0.3                | 1.0                 | 1.0                          | 3.5                 | 1.02E-02            | 0.6                           | 2.1                 | 1.77E-01                       |                    |                  |
| KCONS_00000469 | 0.3                | 1.0                 | 1.0                          | 3.4                 | 1.29E-03            | 0.5                           | 1.5                 | 1.50E-02                       |                    | √                |
| n337060        | 5.9                | 1.0                 | 18.3                         | 3.1                 | 1.06E-02            | 11.7                          | 2.0                 | 2.39E-01                       |                    |                  |
| n341790        | 0.9                | 1.0                 | 2.8                          | 3.1                 | 3.43E-02            | 2.0                           | 2.2                 | 4.66E-01                       |                    |                  |
| n346428        | 0.2                | 1.0                 | 0.6                          | 3.1                 | 3.14E-02            | 0.5                           | 2.3                 | 5.72E-01                       |                    |                  |
| n383762        | 0.8                | 1.0                 | 2.4                          | 3.1                 | 1.66E-02            | 2.3                           | 2.9                 | 5.41E-01                       |                    |                  |
| n408065        | 0.1                | 1.0                 | 0.2                          | 3.0                 | 2.09E-02            | 0.1                           | -1.0                | 3.39E-02                       | √                  | √                |
| n339430        | 0.6                | 1.0                 | 1.7                          | 2.9                 | 1.36E-02            | 1.7                           | 2.8                 | 9.47E-01                       |                    |                  |
| n411621        | 0.3                | 1.0                 | 0.8                          | 2.9                 | 2.13E-02            | 0.6                           | 2.3                 | 4.07E-01                       |                    |                  |
| n341691        | 0.4                | 1.0                 | 1.2                          | 2.9                 | 5.27E-03            | 1.0                           | 2.4                 | 4.27E-01                       |                    |                  |
| n406989        | 1.7                | 1.0                 | 4.9                          | 2.9                 | 2.39E-04            | 4.0                           | 2.3                 | 1.52E-01                       |                    |                  |
| n346347        | 0.2                | 1.0                 | 0.4                          | 2.8                 | 2.60E-02            | 0.4                           | 2.3                 | 4.52E-01                       |                    |                  |
| TCONS_00018416 | 1.0                | 1.0                 | 2.7                          | 2.8                 | 1.49E-02            | 2.5                           | 2.6                 | 7.88E-01                       |                    |                  |
| n341129        | 0.1                | 1.0                 | 0.2                          | 2.8                 | 1.60E-02            | 0.3                           | 3.6                 | 4.11E-01                       |                    |                  |
| n378823        | 0.2                | 1.0                 | 0.5                          | 2.8                 | 1.41E-02            | 0.2                           | 1.2                 | 6.33E-03                       |                    | √                |
| n337076        | 0.4                | 1.0                 | 1.0                          | 2.8                 | 5.50E-03            | 0.4                           | 1.2                 | 7.03E-02                       |                    |                  |
| TCONS_00017819 | 0.3                | 1.0                 | 0.9                          | 2.8                 | 2.72E-02            | 0.3                           | -1.3                | 1.58E-03                       |                    |                  |
| n340521        | 0.3                | 1.0                 | 0.8                          | 2.7                 | 3.22E-02            | 0.6                           | 2.0                 | 3.47E-01                       |                    |                  |
| TCONS_00005774 | 0.3                | 1.0                 | 0.7                          | 2.7                 | 2.22E-02            | 0.4                           | 1.4                 | 8.43E-02                       |                    |                  |
| n383704        | 0.2                | 1.0                 | 0.5                          | 2.7                 | 3.07E-02            | 0.4                           | 2.2                 | 4.74E-01                       |                    |                  |
| n382028        | 0.4                | 1.0                 | 1.2                          | 2.7                 | 2.01E-02            | 0.9                           | 2.1                 | 2.25E-01                       |                    |                  |
| TCONS_00026540 | 0.8                | 1.0                 | 2.0                          | 2.7                 | 3.47E-02            | 1.3                           | 1.8                 | 3.24E-01                       |                    |                  |
| n324208        | 0.5                | 1.0                 | 1.4                          | 2.7                 | 1.49E-02            | 0.8                           | 1.4                 | 1.26E-01                       |                    |                  |
| TCONS_00029250 | 0.2                | 1.0                 | 0.5                          | 2.6                 | 1.87E-02            | 0.3                           | 1.4                 | 2.79E-02                       |                    | √                |
| n382899        | 0.4                | 1.0                 | 1.1                          | 2.6                 | 3.45E-03            | 1.2                           | 2.9                 | 6.89E-01                       |                    |                  |
| n339510        | 0.3                | 1.0                 | 0.8                          | 2.6                 | 3.88E-03            | 0.6                           | 2.1                 | 3.96E-01                       |                    |                  |
| n410010        | 0.8                | 1.0                 | 2.1                          | 2.6                 | 4.70E-06            | 2.2                           | 2.7                 | 7.35E-01                       |                    |                  |
| n333163        | 0.7                | 1.0                 | 1.8                          | 2.6                 | 1.81E-03            | 1.4                           | 2.0                 | 3.01E-01                       |                    |                  |
| TCONS_00002713 | 0.7                | 1.0                 | 1.7                          | 2.5                 | 3.81E-03            | 1.5                           | 2.2                 | 4.27E-01                       |                    |                  |
| n345386        | 11.2               | 1.0                 | 28.3                         | 2.5                 | 3.68E-02            | 30.4                          | 2.7                 | 8.22E-01                       |                    |                  |
| TCONS_00029729 | 0.4                | 1.0                 | 1.0                          | 2.5                 | 8.48E-03            | 1.1                           | 2.7                 | 8.71E-01                       |                    |                  |
| n335575        | 0.2                | 1.0                 | 0.6                          | 2.5                 | 4.44E-02            | 0.5                           | 1.9                 | 3.88E-01                       |                    |                  |
| n410853        | 0.8                | 1.0                 | 1.9                          | 2.5                 | 2.33E-02            | 1.8                           | 2.4                 | 8.82E-01                       |                    |                  |
| n341884        | 0.4                | 1.0                 | 1.1                          | 2.5                 | 5.09E-04            | 0.9                           | 2.0                 | 3.81E-01                       |                    |                  |
| n387441        | 0.4                | 1.0                 | 1.0                          | 2.5                 | 1.27E-02            | 0.7                           | 1.7                 | 6.29E-02                       |                    |                  |
| n338591        | 0.6                | 1.0                 | 1.5                          | 2.5                 | 4.85E-05            | 0.9                           | 1.5                 | 1.87E-02                       |                    | √                |
| n342708        | 0.4                | 1.0                 | 1.1                          | 2.5                 | 1.12E-02            | 0.7                           | 1.5                 | 9.33E-02                       |                    |                  |
| n342389        | 0.9                | 1.0                 | 2.3                          | 2.5                 | 1.70E-02            | 1.2                           | 1.3                 | 7.15E-02                       |                    |                  |
| n411732        | 0.5                | 1.0                 | 1.1                          | 2.5                 | 4.63E-02            | 1.0                           | 2.1                 | 6.37E-01                       |                    |                  |
| n341327        | 0.3                | 1.0                 | 0.7                          | 2.5                 | 4.53E-02            | 0.5                           | 1.8                 | 1.23E-01                       |                    |                  |
| n339755        | 0.2                | 1.0                 | 0.6                          | 2.5                 | 1.09E-02            | 0.4                           | 1.9                 | 3.86E-01                       |                    |                  |
| KCONS_00003774 | 0.3                | 1.0                 | 0.7                          | 2.4                 | 2.03E-02            | 0.5                           | 1.8                 | 1.72E-01                       |                    |                  |
| n379915        | 0.4                | 1.0                 | 0.9                          | 2.4                 | 3.52E-02            | 0.9                           | 2.3                 | 7.70E-01                       |                    |                  |
| n338663        | 0.6                | 1.0                 | 1.4                          | 2.4                 | 2.71E-02            | 1.2                           | 2.2                 | 7.67E-01                       |                    |                  |
| KCONS_00000467 | 0.5                | 1.0                 | 1.2                          | 2.4                 | 1.40E-04            | 0.5                           | 1.0                 | 3.48E-04                       | √                  | √                |
| n334653        | 3.3                | 1.0                 | 7.8                          | 2.4                 | 1.40E-02            | 5.6                           | 1.7                 | 3.30E-01                       |                    |                  |
| n337754        | 0.7                | 1.0                 | 1.5                          | 2.4                 | 8.58E-03            | 1.2                           | 1.8                 | 2.58E-01                       |                    |                  |
| n382098        | 0.4                | 1.0                 | 0.9                          | 2.4                 | 6.01E-03            | 0.9                           | 2.4                 | 9.03E-01                       |                    |                  |
| n381758        | 1.0                | 1.0                 | 2.3                          | 2.3                 | 1.16E-02            | 1.7                           | 1.8                 | 3.19E-01                       |                    |                  |
| n338653        | 0.3                | 1.0                 | 0.7                          | 2.3                 | 3.03E-02            | 0.4                           | 1.4                 | 1.38E-01                       |                    |                  |
| n333054        | 3.2                | 1.0                 | 7.5                          | 2.3                 | 1.21E-04            | 6.5                           | 2.0                 | 3.07E-01                       |                    |                  |
| n378171        | 1.0                | 1.0                 | 2.4                          | 2.3                 | 2.67E-02            | 2.5                           | 2.4                 | 9.35E-01                       |                    |                  |
| n332341        | 0.4                | 1.0                 | 0.9                          | 2.3                 | 3.67E-02            | 0.5                           | 1.3                 | 8.42E-02                       |                    |                  |
| n335092        | 0.5                | 1.0                 | 1.1                          | 2.3                 | 4.79E-02            | 0.5                           | 1.1                 | 1.27E-01                       |                    |                  |
| n338834        | 1.5                | 1.0                 | 3.5                          | 2.3                 | 3.21E-02            | 3.9                           | 2.6                 | 6.58E-01                       |                    |                  |
| n332603        | 389.2              | 1.0                 | 889.0                        | 2.3                 | 7.74E-06            | 776.1                         | 2.0                 | 4.55E-01                       |                    |                  |
| n341425        | 0.6                | 1.0                 | 1.5                          | 2.3                 | 4.29E-02            | 1.0                           | 1.6                 | 2.42E-01                       |                    |                  |
| n338950        | 0.6                | 1.0                 | 1.3                          | 2.3                 | 1.28E-02            | 1.7                           | 2.9                 | 4.55E-01                       |                    |                  |
| n410736        | 0.8                | 1.0                 | 1.7                          | 2.2                 | 6.12E-05            | 1.2                           | 1.6                 | 9.67E-02                       |                    |                  |

|                |      |     |      |     |          |      |      |          |   |   |
|----------------|------|-----|------|-----|----------|------|------|----------|---|---|
| n341527        | 0.3  | 1.0 | 0.6  | 2.2 | 2.10E-02 | 0.4  | 1.4  | 8.11E-02 |   |   |
| n406227        | 1.9  | 1.0 | 4.2  | 2.2 | 9.72E-06 | 3.5  | 1.8  | 1.41E-01 |   |   |
| n340740        | 1.9  | 1.0 | 4.2  | 2.2 | 2.23E-02 | 3.1  | 1.6  | 3.90E-01 |   |   |
| n339682        | 1.9  | 1.0 | 4.1  | 2.2 | 3.38E-03 | 3.4  | 1.8  | 3.71E-01 |   |   |
| n387718        | 0.6  | 1.0 | 1.4  | 2.2 | 5.14E-03 | 1.3  | 2.0  | 6.58E-01 |   |   |
| n406919        | 0.5  | 1.0 | 1.2  | 2.2 | 2.61E-02 | 1.0  | 1.9  | 6.52E-01 |   |   |
| n326378        | 0.9  | 1.0 | 2.0  | 2.2 | 2.20E-02 | 1.4  | 1.6  | 2.57E-01 |   |   |
| n381928        | 0.3  | 1.0 | 0.6  | 2.2 | 5.99E-04 | 0.4  | 1.5  | 1.33E-01 |   |   |
| TCONS_00024663 | 1.2  | 1.0 | 2.5  | 2.2 | 4.72E-02 | 1.8  | 1.6  | 2.48E-01 |   |   |
| n340189        | 0.6  | 1.0 | 1.4  | 2.1 | 1.93E-03 | 1.0  | 1.5  | 3.92E-02 |   | ∨ |
| n381542        | 2.1  | 1.0 | 4.4  | 2.1 | 4.84E-02 | 2.8  | 1.4  | 2.63E-01 |   |   |
| n339627        | 0.4  | 1.0 | 0.8  | 2.1 | 2.35E-03 | 0.5  | 1.4  | 3.02E-02 |   | ∨ |
| n406465        | 0.4  | 1.0 | 0.9  | 2.1 | 1.73E-02 | 0.4  | -1.0 | 2.90E-02 | ∨ | ∨ |
| n337744        | 1.3  | 1.0 | 2.7  | 2.1 | 4.61E-02 | 2.8  | 2.1  | 9.75E-01 |   |   |
| n340062        | 2.0  | 1.0 | 4.3  | 2.1 | 1.30E-02 | 2.4  | 1.2  | 6.76E-02 |   |   |
| n340290        | 0.4  | 1.0 | 0.9  | 2.1 | 2.23E-02 | 0.9  | 2.0  | 8.73E-01 |   |   |
| TCONS_00019382 | 0.4  | 1.0 | 0.8  | 2.1 | 3.87E-02 | 0.4  | 1.2  | 7.78E-02 |   |   |
| n337821        | 0.6  | 1.0 | 1.3  | 2.1 | 4.04E-03 | 0.8  | 1.3  | 1.88E-03 |   | ∨ |
| n338998        | 0.5  | 1.0 | 1.0  | 2.1 | 2.02E-04 | 0.9  | 1.9  | 6.07E-01 |   |   |
| n410040        | 0.3  | 1.0 | 0.7  | 2.1 | 3.85E-02 | 0.6  | 1.9  | 7.77E-01 |   |   |
| n383738        | 0.4  | 1.0 | 0.9  | 2.0 | 5.53E-03 | 0.7  | 1.6  | 8.66E-02 |   |   |
| n333330        | 0.4  | 1.0 | 0.9  | 2.0 | 9.22E-03 | 0.4  | -1.2 | 5.70E-02 |   |   |
| n337799        | 3.3  | 1.0 | 6.8  | 2.0 | 1.38E-04 | 5.0  | 1.5  | 4.75E-02 |   | ∨ |
| n407919        | 0.5  | 1.0 | 1.0  | 2.0 | 1.44E-03 | 0.8  | 1.7  | 4.93E-01 |   |   |
| n341789        | 0.8  | 1.0 | 1.6  | 2.0 | 2.27E-02 | 1.9  | 2.4  | 6.76E-01 |   |   |
| TCONS_00024235 | 2.2  | 1.0 | 4.4  | 2.0 | 9.29E-03 | 3.3  | 1.5  | 3.31E-01 |   |   |
| n339725        | 1.2  | 1.0 | 2.5  | 2.0 | 2.45E-02 | 1.8  | 1.5  | 2.13E-01 |   |   |
| n337221        | 0.4  | 1.0 | 0.9  | 2.0 | 2.41E-02 | 0.7  | 1.6  | 2.86E-01 |   |   |
| n336960        | 4.9  | 1.0 | 9.8  | 2.0 | 5.01E-03 | 6.2  | 1.3  | 6.27E-02 |   |   |
| n385443        | 7.8  | 1.0 | 15.4 | 2.0 | 8.75E-03 | 15.0 | 1.9  | 8.69E-01 |   |   |
| n405969        | 0.4  | 1.0 | 0.7  | 2.0 | 1.54E-03 | 0.4  | 1.2  | 4.72E-02 |   | ∨ |
| n332611        | 6.6  | 1.0 | 13.1 | 2.0 | 7.54E-03 | 14.7 | 2.2  | 6.61E-01 |   |   |
| n407534        | 1.8  | 1.0 | 3.6  | 2.0 | 1.85E-02 | 3.1  | 1.7  | 6.10E-01 |   |   |
| n340820        | 0.3  | 1.0 | 0.5  | 2.0 | 9.06E-03 | 0.5  | 2.0  | 9.89E-01 |   |   |
| n407967        | 0.8  | 1.0 | 1.6  | 2.0 | 2.97E-02 | 0.8  | 1.0  | 7.27E-02 |   |   |
| n341167        | 7.3  | 1.0 | 14.2 | 2.0 | 1.16E-03 | 12.4 | 1.7  | 3.43E-01 |   |   |
| n339905        | 1.2  | 1.0 | 2.3  | 1.9 | 4.76E-02 | 2.2  | 1.9  | 8.75E-01 |   |   |
| n334841        | 2.0  | 1.0 | 3.9  | 1.9 | 4.43E-03 | 3.3  | 1.6  | 2.97E-01 |   |   |
| TCONS_00016755 | 0.3  | 1.0 | 0.6  | 1.9 | 3.66E-02 | 0.5  | 1.6  | 5.60E-01 |   |   |
| n332847        | 3.7  | 1.0 | 7.2  | 1.9 | 4.51E-02 | 6.9  | 1.9  | 8.35E-01 |   |   |
| n341582        | 0.3  | 1.0 | 0.6  | 1.9 | 3.07E-02 | 0.5  | 1.4  | 2.67E-01 |   |   |
| TCONS_00027828 | 0.3  | 1.0 | 0.6  | 1.9 | 9.70E-03 | 0.5  | 1.6  | 4.68E-01 |   |   |
| n338223        | 1.8  | 1.0 | 3.5  | 1.9 | 2.47E-03 | 3.2  | 1.7  | 5.90E-01 |   |   |
| TCONS_00001044 | 1.4  | 1.0 | 2.6  | 1.9 | 1.51E-02 | 2.0  | 1.5  | 4.13E-01 |   |   |
| TCONS_00017676 | 0.3  | 1.0 | 0.6  | 1.9 | 2.43E-02 | 0.6  | 1.7  | 6.73E-01 |   |   |
| n335699        | 2.2  | 1.0 | 4.2  | 1.9 | 3.40E-04 | 3.9  | 1.8  | 5.56E-01 |   |   |
| n385039        | 0.5  | 1.0 | 0.8  | 1.9 | 2.80E-03 | 0.8  | 1.8  | 7.07E-01 |   |   |
| n338387        | 1.6  | 1.0 | 3.0  | 1.9 | 6.79E-04 | 2.3  | 1.4  | 2.06E-01 |   |   |
| n410199        | 0.4  | 1.0 | 0.8  | 1.9 | 2.74E-02 | 0.7  | 1.7  | 5.79E-01 |   |   |
| n335661        | 1.4  | 1.0 | 2.7  | 1.9 | 6.28E-04 | 2.0  | 1.4  | 1.82E-01 |   |   |
| n379110        | 0.5  | 1.0 | 1.0  | 1.9 | 2.68E-04 | 0.7  | 1.4  | 1.19E-01 |   |   |
| n377799        | 1.0  | 1.0 | 1.8  | 1.9 | 1.15E-02 | 1.6  | 1.6  | 5.76E-01 |   |   |
| n341541        | 0.6  | 1.0 | 1.2  | 1.9 | 3.08E-03 | 0.9  | 1.4  | 4.60E-02 |   | ∨ |
| n337722        | 0.4  | 1.0 | 0.8  | 1.9 | 2.00E-02 | 0.7  | 1.7  | 7.04E-01 |   |   |
| n344724        | 0.6  | 1.0 | 1.0  | 1.9 | 5.13E-04 | 0.8  | 1.4  | 5.78E-02 |   |   |
| n340499        | 0.6  | 1.0 | 1.2  | 1.8 | 6.41E-03 | 0.6  | -1.0 | 1.92E-02 | ∨ | ∨ |
| n406604        | 0.7  | 1.0 | 1.2  | 1.8 | 3.37E-02 | 1.0  | 1.5  | 1.94E-01 |   |   |
| n407746        | 1.3  | 1.0 | 2.4  | 1.8 | 6.24E-04 | 1.7  | 1.3  | 1.11E-02 |   | ∨ |
| n410935        | 0.6  | 1.0 | 1.2  | 1.8 | 1.14E-02 | 0.6  | -1.1 | 5.23E-02 |   |   |
| n339210        | 0.5  | 1.0 | 0.9  | 1.8 | 1.63E-02 | 0.8  | 1.8  | 9.42E-01 |   |   |
| n410723        | 2.4  | 1.0 | 4.5  | 1.8 | 7.28E-05 | 3.9  | 1.6  | 1.56E-01 |   |   |
| n335708        | 7.1  | 1.0 | 12.9 | 1.8 | 1.66E-02 | 11.1 | 1.6  | 5.04E-01 |   |   |
| n408308        | 3.5  | 1.0 | 6.4  | 1.8 | 1.37E-05 | 5.6  | 1.6  | 3.28E-01 |   |   |
| n378771        | 0.5  | 1.0 | 0.9  | 1.8 | 2.20E-02 | 0.6  | 1.2  | 7.90E-02 |   |   |
| n340547        | 2.3  | 1.0 | 4.1  | 1.8 | 7.22E-03 | 4.9  | 2.1  | 5.07E-01 |   |   |
| n344814        | 3.5  | 1.0 | 6.3  | 1.8 | 2.90E-02 | 5.4  | 1.5  | 1.52E-01 |   |   |
| n340649        | 2.0  | 1.0 | 3.5  | 1.8 | 1.84E-03 | 3.5  | 1.8  | 8.52E-01 |   |   |
| n408017        | 0.8  | 1.0 | 1.4  | 1.8 | 2.70E-03 | 1.2  | 1.6  | 4.07E-01 |   |   |
| n407412        | 0.8  | 1.0 | 1.5  | 1.8 | 1.16E-02 | 1.1  | 1.3  | 3.03E-03 |   | ∨ |
| n341189        | 2.1  | 1.0 | 3.8  | 1.8 | 4.70E-03 | 2.4  | 1.1  | 3.74E-02 |   | ∨ |
| TCONS_00010940 | 1.0  | 1.0 | 1.8  | 1.8 | 4.02E-02 | 1.7  | 1.7  | 5.46E-01 |   |   |
| n386148        | 1.3  | 1.0 | 2.2  | 1.8 | 4.85E-04 | 1.6  | 1.3  | 1.36E-02 |   | ∨ |
| n335721        | 12.8 | 1.0 | 22.8 | 1.8 | 3.37E-02 | 34.0 | 2.6  | 1.93E-01 |   |   |
| n405970        | 1.3  | 1.0 | 2.2  | 1.8 | 1.37E-02 | 2.0  | 1.6  | 6.93E-01 |   |   |
| KCONS_00003555 | 0.7  | 1.0 | 1.2  | 1.8 | 1.78E-02 | 1.1  | 1.6  | 5.48E-01 |   |   |
| n382693        | 0.4  | 1.0 | 0.7  | 1.8 | 2.30E-02 | 0.7  | 1.7  | 8.42E-01 |   |   |
| n335674        | 2.3  | 1.0 | 4.0  | 1.8 | 1.94E-02 | 4.0  | 1.7  | 9.62E-01 |   |   |
| n339097        | 3.2  | 1.0 | 5.7  | 1.8 | 1.50E-02 | 5.0  | 1.5  | 4.92E-01 |   |   |
| n335608        | 1.1  | 1.0 | 1.9  | 1.8 | 3.43E-02 | 1.4  | 1.3  | 1.82E-01 |   |   |
| n407998        | 0.8  | 1.0 | 1.5  | 1.8 | 1.03E-02 | 1.1  | 1.3  | 2.33E-01 |   |   |
| n337537        | 2.0  | 1.0 | 3.5  | 1.8 | 7.31E-03 | 2.0  | -1.0 | 6.49E-02 |   |   |
| n384416        | 2.0  | 1.0 | 3.5  | 1.8 | 1.72E-03 | 2.9  | 1.5  | 1.34E-01 |   |   |
| n338524        | 1.8  | 1.0 | 3.1  | 1.7 | 1.60E-03 | 2.5  | 1.4  | 1.47E-01 |   |   |

|                |      |     |      |     |          |      |      |          |   |   |
|----------------|------|-----|------|-----|----------|------|------|----------|---|---|
| n380504        | 1.1  | 1.0 | 1.9  | 1.7 | 2.38E-02 | 1.7  | 1.6  | 7.00E-01 |   |   |
| TCONS_00001037 | 0.5  | 1.0 | 0.9  | 1.7 | 3.17E-02 | 0.9  | 1.6  | 8.17E-01 |   |   |
| n385202        | 0.8  | 1.0 | 1.4  | 1.7 | 9.60E-03 | 1.4  | 1.7  | 7.08E-01 |   |   |
| n411677        | 0.7  | 1.0 | 1.3  | 1.7 | 1.25E-02 | 1.0  | 1.3  | 2.88E-02 |   |   |
| n410692        | 2.6  | 1.0 | 4.5  | 1.7 | 2.23E-02 | 4.1  | 1.6  | 6.21E-01 |   |   |
| n335515        | 1.0  | 1.0 | 1.7  | 1.7 | 1.32E-02 | 0.9  | -1.1 | 1.28E-02 | v | v |
| KCONS_00003428 | 0.7  | 1.0 | 1.2  | 1.7 | 1.76E-02 | 1.0  | 1.4  | 2.09E-01 |   |   |
| n335242        | 2.2  | 1.0 | 3.9  | 1.7 | 1.00E-02 | 3.2  | 1.4  | 3.34E-01 |   |   |
| n386687        | 1.0  | 1.0 | 1.8  | 1.7 | 1.82E-02 | 1.7  | 1.6  | 8.04E-01 |   |   |
| n338221        | 1.0  | 1.0 | 1.7  | 1.7 | 1.54E-02 | 1.5  | 1.5  | 4.34E-01 |   |   |
| n339852        | 0.9  | 1.0 | 1.5  | 1.7 | 4.45E-02 | 1.5  | 1.7  | 9.99E-01 |   |   |
| n385212        | 3.5  | 1.0 | 6.0  | 1.7 | 3.38E-02 | 5.4  | 1.5  | 5.38E-01 |   |   |
| n342264        | 0.5  | 1.0 | 0.8  | 1.7 | 2.89E-03 | 0.8  | 1.7  | 8.94E-01 |   |   |
| TCONS_00024664 | 1.0  | 1.0 | 1.7  | 1.7 | 4.20E-02 | 1.4  | 1.4  | 4.32E-01 |   |   |
| TCONS_00025781 | 1.3  | 1.0 | 2.3  | 1.7 | 2.01E-02 | 1.8  | 1.3  | 1.09E-01 |   |   |
| n407523        | 1.7  | 1.0 | 3.0  | 1.7 | 1.84E-02 | 2.6  | 1.5  | 3.81E-01 |   |   |
| n340934        | 1.6  | 1.0 | 2.8  | 1.7 | 1.64E-02 | 2.3  | 1.4  | 4.52E-01 |   |   |
| n335614        | 44.9 | 1.0 | 76.3 | 1.7 | 1.07E-03 | 67.2 | 1.5  | 1.97E-01 |   |   |
| n335618        | 21.1 | 1.0 | 35.8 | 1.7 | 4.60E-02 | 33.7 | 1.6  | 7.11E-01 |   |   |
| n410153        | 0.8  | 1.0 | 1.3  | 1.7 | 3.21E-03 | 1.1  | 1.4  | 6.82E-02 |   |   |
| n382658        | 1.0  | 1.0 | 1.7  | 1.7 | 2.90E-02 | 1.7  | 1.7  | 9.97E-01 |   |   |
| n407776        | 3.7  | 1.0 | 6.2  | 1.7 | 6.49E-03 | 5.0  | 1.4  | 2.44E-01 |   |   |
| n406597        | 1.9  | 1.0 | 3.2  | 1.7 | 2.53E-02 | 2.1  | 1.1  | 4.49E-02 | v | v |
| n344464        | 2.5  | 1.0 | 4.2  | 1.7 | 1.96E-02 | 3.2  | 1.3  | 6.96E-02 |   |   |
| n339032        | 0.9  | 1.0 | 1.5  | 1.7 | 3.57E-02 | 1.1  | 1.3  | 2.19E-01 |   |   |
| n382902        | 1.4  | 1.0 | 2.3  | 1.7 | 3.57E-02 | 1.7  | 1.3  | 2.19E-01 |   |   |
| n381725        | 13.9 | 1.0 | 23.3 | 1.7 | 1.15E-02 | 15.6 | 1.1  | 1.27E-02 |   | v |
| n377862        | 0.4  | 1.0 | 0.6  | 1.7 | 2.82E-02 | 0.7  | 1.9  | 3.21E-01 |   |   |
| n410146        | 0.5  | 1.0 | 0.9  | 1.7 | 2.08E-02 | 0.6  | 1.2  | 7.28E-02 |   |   |
| TCONS_00017978 | 2.6  | 1.0 | 4.4  | 1.7 | 3.41E-02 | 3.3  | 1.3  | 6.41E-02 |   |   |
| n337663        | 0.5  | 1.0 | 0.9  | 1.7 | 1.59E-02 | 0.6  | 1.2  | 1.21E-02 |   | v |
| n409697        | 4.9  | 1.0 | 8.1  | 1.7 | 1.22E-05 | 6.5  | 1.3  | 1.48E-02 |   |   |
| n346481        | 0.6  | 1.0 | 1.0  | 1.7 | 2.76E-02 | 0.7  | 1.2  | 2.89E-02 |   | v |
| n386343        | 2.7  | 1.0 | 4.4  | 1.7 | 2.05E-03 | 3.6  | 1.3  | 6.27E-02 |   |   |
| n338632        | 0.4  | 1.0 | 0.7  | 1.6 | 1.46E-02 | 0.8  | 1.9  | 5.99E-01 |   |   |
| n410210        | 2.5  | 1.0 | 4.1  | 1.6 | 1.74E-02 | 3.7  | 1.5  | 5.81E-01 |   |   |
| n333506        | 2.1  | 1.0 | 3.4  | 1.6 | 6.94E-03 | 4.0  | 2.0  | 9.53E-02 |   |   |
| n341454        | 7.5  | 1.0 | 12.3 | 1.6 | 3.44E-03 | 11.5 | 1.5  | 5.46E-01 |   |   |
| n407227        | 7.9  | 1.0 | 13.0 | 1.6 | 1.66E-03 | 10.3 | 1.3  | 5.11E-02 |   |   |
| n379599        | 2.9  | 1.0 | 4.7  | 1.6 | 5.28E-04 | 4.5  | 1.6  | 6.99E-01 |   |   |
| n408884        | 3.3  | 1.0 | 5.4  | 1.6 | 2.35E-02 | 4.8  | 1.4  | 5.92E-01 |   |   |
| n342847        | 8.7  | 1.0 | 14.3 | 1.6 | 4.05E-04 | 13.2 | 1.5  | 6.25E-01 |   |   |
| n337828        | 0.4  | 1.0 | 0.6  | 1.6 | 3.77E-02 | 0.6  | 1.5  | 7.24E-01 |   |   |
| n386598        | 0.9  | 1.0 | 1.5  | 1.6 | 4.70E-02 | 0.9  | -1.0 | 8.36E-02 |   |   |
| n341120        | 0.6  | 1.0 | 1.0  | 1.6 | 1.42E-02 | 0.6  | 1.1  | 3.58E-02 | v | v |
| TCONS_00008328 | 1.3  | 1.0 | 2.2  | 1.6 | 3.04E-02 | 1.4  | 1.1  | 4.95E-02 | v | v |
| n406843        | 1.4  | 1.0 | 2.3  | 1.6 | 6.04E-03 | 1.6  | 1.1  | 9.73E-03 |   | v |
| n340087        | 0.9  | 1.0 | 1.5  | 1.6 | 3.05E-02 | 1.6  | 1.7  | 8.22E-01 |   |   |
| n378108        | 0.9  | 1.0 | 1.5  | 1.6 | 3.11E-02 | 1.3  | 1.4  | 6.22E-01 |   |   |
| n384394        | 0.8  | 1.0 | 1.3  | 1.6 | 4.45E-02 | 1.1  | 1.4  | 4.65E-01 |   |   |
| n339699        | 1.4  | 1.0 | 2.3  | 1.6 | 2.16E-02 | 1.8  | 1.3  | 2.18E-01 |   |   |
| n341644        | 4.9  | 1.0 | 7.9  | 1.6 | 1.65E-03 | 7.2  | 1.5  | 3.30E-01 |   |   |
| TCONS_00025708 | 3.1  | 1.0 | 4.9  | 1.6 | 2.35E-04 | 5.1  | 1.7  | 7.22E-01 |   |   |
| n332613        | 1.2  | 1.0 | 1.9  | 1.6 | 1.11E-03 | 1.9  | 1.6  | 7.79E-01 |   |   |
| n346209        | 1.6  | 1.0 | 2.6  | 1.6 | 3.68E-02 | 1.5  | -1.1 | 1.03E-02 | v | v |
| n410544        | 0.7  | 1.0 | 1.1  | 1.6 | 3.34E-02 | 0.5  | -1.5 | 2.25E-02 |   |   |
| n387632        | 1.2  | 1.0 | 1.9  | 1.6 | 3.93E-02 | 1.8  | 1.6  | 9.36E-01 |   |   |
| n341045        | 2.1  | 1.0 | 3.4  | 1.6 | 4.13E-03 | 2.5  | 1.2  | 8.89E-02 |   |   |
| n335593        | 3.3  | 1.0 | 5.3  | 1.6 | 3.51E-02 | 5.3  | 1.6  | 9.84E-01 |   |   |
| n406636        | 0.7  | 1.0 | 1.1  | 1.6 | 2.53E-02 | 1.0  | 1.4  | 5.09E-01 |   |   |
| n406454        | 0.5  | 1.0 | 0.7  | 1.6 | 7.98E-03 | 1.0  | 2.2  | 2.04E-01 |   |   |
| n386047        | 1.0  | 1.0 | 1.5  | 1.6 | 9.23E-03 | 1.1  | 1.2  | 1.15E-01 |   |   |
| n332409        | 3.8  | 1.0 | 6.1  | 1.6 | 1.68E-03 | 4.8  | 1.2  | 4.27E-02 |   |   |
| n383211        | 0.9  | 1.0 | 1.5  | 1.6 | 4.12E-03 | 1.7  | 1.8  | 5.47E-01 |   |   |
| n339518        | 0.5  | 1.0 | 0.8  | 1.6 | 3.33E-02 | 0.5  | 1.1  | 9.32E-02 |   |   |
| n410165        | 2.2  | 1.0 | 3.5  | 1.6 | 3.04E-02 | 2.7  | 1.2  | 4.07E-02 |   |   |
| n406809        | 0.6  | 1.0 | 1.0  | 1.6 | 1.90E-02 | 0.7  | 1.1  | 1.36E-01 |   |   |
| n411100        | 0.9  | 1.0 | 1.5  | 1.6 | 4.17E-02 | 1.5  | 1.6  | 9.74E-01 |   |   |
| n410131        | 0.7  | 1.0 | 1.0  | 1.6 | 4.15E-02 | 1.1  | 1.7  | 5.63E-01 |   |   |
| n385278        | 24.7 | 1.0 | 39.1 | 1.6 | 7.16E-05 | 38.5 | 1.6  | 8.37E-01 |   |   |
| n409227        | 1.2  | 1.0 | 1.9  | 1.6 | 1.63E-02 | 1.7  | 1.5  | 6.11E-01 |   |   |
| n410530        | 3.9  | 1.0 | 6.2  | 1.6 | 2.88E-02 | 6.3  | 1.6  | 9.18E-01 |   |   |
| n335628        | 7.8  | 1.0 | 12.3 | 1.6 | 1.23E-02 | 12.2 | 1.6  | 9.43E-01 |   |   |
| n339643        | 1.6  | 1.0 | 2.4  | 1.6 | 2.73E-02 | 2.5  | 1.6  | 9.46E-01 |   |   |
| n407077        | 1.1  | 1.0 | 1.8  | 1.6 | 2.97E-02 | 1.3  | 1.1  | 1.06E-01 |   |   |
| n381786        | 5.2  | 1.0 | 8.2  | 1.6 | 1.00E-02 | 7.2  | 1.4  | 3.55E-01 |   |   |
| n345418        | 0.8  | 1.0 | 1.3  | 1.6 | 2.65E-03 | 1.1  | 1.3  | 6.23E-02 |   |   |
| n336952        | 0.8  | 1.0 | 1.2  | 1.6 | 1.59E-02 | 0.8  | -1.0 | 1.02E-01 |   |   |
| n340788        | 2.2  | 1.0 | 3.4  | 1.6 | 6.78E-05 | 2.8  | 1.3  | 1.10E-01 |   |   |
| n408050        | 8.0  | 1.0 | 12.5 | 1.6 | 8.46E-03 | 19.2 | 2.4  | 1.20E-01 |   |   |
| n339180        | 3.3  | 1.0 | 5.1  | 1.6 | 2.88E-04 | 4.1  | 1.2  | 2.21E-02 |   |   |
| n338422        | 2.6  | 1.0 | 4.0  | 1.6 | 1.25E-02 | 3.5  | 1.4  | 4.27E-01 |   |   |
| n341889        | 1.5  | 1.0 | 2.3  | 1.6 | 4.42E-02 | 1.9  | 1.3  | 2.12E-01 |   |   |
| n382995        | 6.0  | 1.0 | 9.3  | 1.6 | 6.08E-04 | 8.0  | 1.3  | 2.41E-01 |   |   |

|                |      |     |      |     |          |      |      |          |   |   |
|----------------|------|-----|------|-----|----------|------|------|----------|---|---|
| TCONS_00027439 | 0.7  | 1.0 | 1.0  | 1.6 | 1.88E-02 | 0.7  | 1.0  | 2.67E-03 | ∇ | ∇ |
| n342577        | 3.8  | 1.0 | 5.9  | 1.5 | 1.46E-02 | 5.4  | 1.4  | 5.91E-01 |   |   |
| n343020        | 1.6  | 1.0 | 2.4  | 1.5 | 2.87E-02 | 1.9  | 1.2  | 2.59E-01 |   |   |
| n342817        | 4.1  | 1.0 | 6.3  | 1.5 | 3.83E-06 | 6.0  | 1.5  | 7.41E-02 |   |   |
| n340294        | 2.7  | 1.0 | 4.1  | 1.5 | 3.68E-02 | 3.5  | 1.3  | 1.82E-01 |   |   |
| n407400        | 1.3  | 1.0 | 2.0  | 1.5 | 4.86E-03 | 1.4  | 1.1  | 4.95E-02 |   | ∇ |
| n408905        | 2.5  | 1.0 | 3.9  | 1.5 | 5.77E-03 | 2.8  | 1.1  | 3.22E-02 |   | ∇ |
| n410128        | 3.7  | 1.0 | 5.7  | 1.5 | 4.46E-03 | 5.5  | 1.5  | 7.65E-01 |   |   |
| n338122        | 0.5  | 1.0 | 0.8  | 1.5 | 1.68E-02 | 0.6  | 1.2  | 3.70E-01 |   |   |
| n407189        | 1.7  | 1.0 | 2.6  | 1.5 | 2.53E-02 | 1.8  | 1.0  | 7.89E-02 |   |   |
| n338902        | 1.8  | 1.0 | 2.7  | 1.5 | 3.06E-03 | 2.5  | 1.4  | 5.17E-01 |   |   |
| n410744        | 3.5  | 1.0 | 5.4  | 1.5 | 6.98E-03 | 4.1  | 1.2  | 7.14E-02 |   |   |
| n340248        | 1.8  | 1.0 | 2.8  | 1.5 | 4.36E-03 | 2.5  | 1.4  | 4.08E-01 |   |   |
| n406278        | 1.3  | 1.0 | 2.0  | 1.5 | 1.44E-03 | 1.6  | 1.2  | 4.71E-02 |   |   |
| n411618        | 0.8  | 1.0 | 1.3  | 1.5 | 1.45E-02 | 1.2  | 1.4  | 4.96E-01 |   |   |
| n341533        | 0.5  | 1.0 | 0.8  | 1.5 | 2.56E-02 | 0.8  | 1.5  | 7.28E-01 |   |   |
| n335642        | 5.3  | 1.0 | 8.1  | 1.5 | 4.94E-02 | 6.4  | 1.2  | 6.45E-02 |   |   |
| n409073        | 0.7  | 1.0 | 1.0  | 1.5 | 8.28E-04 | 0.8  | 1.2  | 1.68E-01 |   |   |
| n407843        | 0.9  | 1.0 | 1.3  | 1.5 | 1.37E-02 | 1.1  | 1.3  | 2.76E-01 |   |   |
| TCONS_00002935 | 2.3  | 1.0 | 3.6  | 1.5 | 1.23E-03 | 3.2  | 1.4  | 2.86E-01 |   |   |
| n409064        | 1.6  | 1.0 | 2.5  | 1.5 | 1.65E-03 | 1.9  | 1.2  | 6.33E-02 |   |   |
| n332941        | 5.3  | 1.0 | 8.1  | 1.5 | 2.24E-03 | 6.7  | 1.3  | 2.05E-01 |   |   |
| n337979        | 2.2  | 1.0 | 3.4  | 1.5 | 1.43E-03 | 3.3  | 1.5  | 7.77E-01 |   |   |
| n326361        | 5.7  | 1.0 | 8.6  | 1.5 | 6.36E-05 | 6.4  | 1.1  | 3.63E-03 |   | ∇ |
| n408096        | 1.7  | 1.0 | 2.6  | 1.5 | 3.71E-02 | 2.1  | 1.2  | 3.00E-01 |   |   |
| n339305        | 1.5  | 1.0 | 2.3  | 1.5 | 4.84E-04 | 2.0  | 1.3  | 2.42E-01 |   |   |
| n342574        | 1.4  | 1.0 | 2.1  | 1.5 | 2.23E-02 | 1.7  | 1.2  | 1.39E-01 |   |   |
| n381109        | 6.4  | 1.0 | 9.6  | 1.5 | 1.89E-03 | 12.2 | 1.9  | 1.28E-01 |   |   |
| n407212        | 0.6  | 1.0 | 0.9  | 1.5 | 2.51E-02 | 0.7  | 1.3  | 1.32E-01 |   |   |
| n340204        | 1.9  | 1.0 | 2.8  | 1.5 | 7.11E-03 | 3.1  | 1.7  | 3.93E-01 |   |   |
| n335717        | 6.0  | 1.0 | 9.0  | 1.5 | 6.03E-03 | 8.3  | 1.4  | 4.38E-01 |   |   |
| n342861        | 1.8  | 1.0 | 2.7  | 1.5 | 1.85E-02 | 2.4  | 1.3  | 3.24E-01 |   |   |
| n338971        | 5.5  | 1.0 | 8.3  | 1.5 | 1.63E-03 | 7.2  | 1.3  | 1.58E-01 |   |   |
| n377756        | 1.3  | 1.0 | 2.0  | 1.5 | 1.15E-03 | 1.9  | 1.4  | 5.43E-01 |   |   |
| n410583        | 0.5  | 1.0 | 0.7  | 1.5 | 4.20E-03 | 0.6  | 1.3  | 2.22E-01 |   |   |
| n337982        | 1.9  | 1.0 | 2.8  | 1.5 | 4.77E-02 | 2.5  | 1.3  | 6.55E-01 |   |   |
| n335650        | 3.9  | 1.0 | 5.8  | 1.5 | 1.45E-02 | 4.3  | 1.1  | 4.31E-02 |   |   |
| n409260        | 0.7  | 1.0 | 1.0  | 1.5 | 6.85E-04 | 0.9  | 1.3  | 3.11E-01 |   |   |
| n340921        | 3.1  | 1.0 | 4.6  | 1.5 | 4.36E-04 | 4.1  | 1.3  | 1.96E-01 |   |   |
| n341275        | 2.3  | 1.0 | 3.5  | 1.5 | 3.26E-03 | 3.5  | 1.5  | 9.91E-01 |   |   |
| n340531        | 8.9  | 1.0 | 13.1 | 1.5 | 1.97E-04 | 11.5 | 1.3  | 1.44E-01 |   |   |
| n410733        | 1.2  | 1.0 | 1.8  | 1.5 | 3.24E-03 | 1.4  | 1.2  | 2.15E-01 |   |   |
| n337872        | 1.2  | 1.0 | 1.8  | 1.5 | 1.66E-04 | 1.7  | 1.4  | 4.16E-01 |   |   |
| n340650        | 1.6  | 1.0 | 2.4  | 1.5 | 3.38E-03 | 2.8  | 1.7  | 1.58E-01 |   |   |
| n407822        | 1.3  | 1.0 | 1.9  | 1.5 | 4.35E-03 | 1.5  | 1.2  | 1.17E-01 |   |   |
| n384258        | 1.7  | 1.0 | 2.4  | 1.5 | 6.45E-03 | 1.7  | 1.0  | 2.68E-02 | ∇ | ∇ |
| n334075        | 4.1  | 1.0 | 6.1  | 1.5 | 3.21E-02 | 6.2  | 1.5  | 9.13E-01 |   |   |
| n337793        | 3.2  | 1.0 | 4.7  | 1.5 | 4.82E-02 | 5.4  | 1.7  | 4.41E-01 |   |   |
| n340510        | 3.0  | 1.0 | 4.4  | 1.5 | 4.14E-02 | 3.1  | 1.1  | 1.35E-01 |   |   |
| n342788        | 10.0 | 1.0 | 14.7 | 1.5 | 8.79E-04 | 15.0 | 1.5  | 7.87E-01 |   |   |
| n338484        | 3.4  | 1.0 | 5.0  | 1.5 | 2.84E-02 | 5.0  | 1.5  | 9.92E-01 |   |   |
| n335594        | 1.9  | 1.0 | 2.8  | 1.5 | 5.00E-03 | 3.6  | 1.9  | 1.20E-01 |   |   |
| n405440        | 1.4  | 1.0 | 2.1  | 1.5 | 1.04E-02 | 2.2  | 1.5  | 7.18E-01 |   |   |
| n343053        | 1.9  | 1.0 | 2.8  | 1.5 | 3.31E-03 | 3.3  | 1.7  | 2.94E-01 |   |   |
| n339967        | 2.5  | 1.0 | 3.6  | 1.5 | 4.00E-04 | 3.4  | 1.4  | 4.71E-01 |   |   |
| n335592        | 14.5 | 1.0 | 21.2 | 1.5 | 1.02E-03 | 16.2 | 1.1  | 4.15E-02 |   |   |
| n408354        | 3.1  | 1.0 | 4.6  | 1.5 | 1.57E-02 | 4.5  | 1.4  | 8.94E-01 |   |   |
| n339188        | 0.8  | 1.0 | 1.2  | 1.5 | 2.87E-02 | 0.9  | 1.2  | 9.02E-02 |   |   |
| n405879        | 0.5  | 1.0 | 0.7  | 1.5 | 4.77E-02 | 0.7  | 1.4  | 8.16E-01 |   |   |
| n406590        | 9.4  | 1.0 | 13.7 | 1.5 | 4.43E-03 | 11.1 | 1.2  | 1.10E-01 |   |   |
| n410616        | 4.0  | 1.0 | 5.9  | 1.5 | 1.77E-03 | 4.8  | 1.2  | 1.66E-02 |   |   |
| n338043        | 2.9  | 1.0 | 4.3  | 1.5 | 2.34E-02 | 4.0  | 1.4  | 5.76E-01 |   |   |
| n410030        | 4.1  | 1.0 | 5.9  | 1.5 | 3.63E-02 | 4.5  | 1.1  | 9.60E-02 |   |   |
| n335648        | 28.3 | 1.0 | 41.1 | 1.5 | 3.34E-02 | 41.8 | 1.5  | 9.27E-01 |   |   |
| n341097        | 0.5  | 1.0 | 0.7  | 1.5 | 1.89E-02 | 0.6  | 1.2  | 6.80E-02 |   |   |
| n342731        | 6.0  | 1.0 | 8.7  | 1.4 | 3.30E-04 | 6.8  | 1.1  | 3.15E-02 |   |   |
| n410471        | 13.1 | 1.0 | 18.9 | 1.4 | 8.29E-03 | 14.4 | 1.1  | 1.58E-01 |   |   |
| n342381        | 1.3  | 1.0 | 1.9  | 1.4 | 1.81E-03 | 1.7  | 1.3  | 3.58E-01 |   |   |
| n407986        | 4.5  | 1.0 | 6.5  | 1.4 | 1.98E-03 | 6.4  | 1.4  | 7.88E-01 |   |   |
| n339355        | 11.4 | 1.0 | 16.5 | 1.4 | 6.39E-03 | 13.1 | 1.1  | 7.18E-02 |   |   |
| n342280        | 0.6  | 1.0 | 0.9  | 1.4 | 3.45E-02 | 0.8  | 1.4  | 7.27E-01 |   |   |
| n407837        | 5.6  | 1.0 | 8.1  | 1.4 | 7.94E-04 | 7.4  | 1.3  | 4.96E-01 |   |   |
| n410133        | 2.0  | 1.0 | 2.9  | 1.4 | 1.08E-02 | 2.2  | 1.1  | 7.55E-03 | ∇ | ∇ |
| n340651        | 0.5  | 1.0 | 0.7  | 1.4 | 4.68E-02 | 0.7  | 1.3  | 6.84E-01 |   |   |
| TCONS_00025146 | 1.1  | 1.0 | 1.6  | 1.4 | 6.00E-03 | 1.8  | 1.6  | 2.94E-01 |   |   |
| n410604        | 31.3 | 1.0 | 45.1 | 1.4 | 2.56E-06 | 45.2 | 1.4  | 9.72E-01 |   |   |
| n411752        | 3.8  | 1.0 | 5.5  | 1.4 | 5.57E-05 | 5.0  | 1.3  | 7.82E-02 |   |   |
| n407939        | 1.3  | 1.0 | 1.8  | 1.4 | 2.14E-02 | 1.5  | 1.2  | 1.72E-01 |   |   |
| n342880        | 3.0  | 1.0 | 4.3  | 1.4 | 8.82E-03 | 3.1  | 1.1  | 4.01E-03 | ∇ | ∇ |
| n339680        | 4.3  | 1.0 | 6.2  | 1.4 | 1.86E-02 | 6.1  | 1.4  | 8.67E-01 |   |   |
| n410166        | 2.3  | 1.0 | 3.3  | 1.4 | 1.95E-03 | 2.6  | 1.1  | 1.59E-01 |   |   |
| n340631        | 3.1  | 1.0 | 4.5  | 1.4 | 2.54E-03 | 3.1  | -1.0 | 3.44E-02 | ∇ | ∇ |
| n341171        | 1.4  | 1.0 | 1.9  | 1.4 | 1.63E-03 | 1.8  | 1.3  | 4.08E-01 |   |   |
| n338162        | 13.2 | 1.0 | 18.8 | 1.4 | 7.84E-03 | 20.7 | 1.6  | 5.09E-01 |   |   |

|         |       |     |       |     |          |       |      |          |   |   |
|---------|-------|-----|-------|-----|----------|-------|------|----------|---|---|
| n407859 | 1.7   | 1.0 | 2.4   | 1.4 | 1.34E-02 | 2.0   | 1.2  | 4.49E-02 |   |   |
| n410004 | 2.0   | 1.0 | 2.8   | 1.4 | 1.38E-03 | 2.9   | 1.5  | 6.94E-01 |   |   |
| n338578 | 1.1   | 1.0 | 1.6   | 1.4 | 1.61E-02 | 1.4   | 1.3  | 2.33E-01 |   |   |
| n342855 | 19.0  | 1.0 | 27.0  | 1.4 | 6.07E-03 | 24.6  | 1.3  | 4.68E-01 |   |   |
| n338213 | 3.1   | 1.0 | 4.4   | 1.4 | 5.91E-03 | 3.4   | 1.1  | 2.08E-02 |   |   |
| n410549 | 13.5  | 1.0 | 19.2  | 1.4 | 1.25E-02 | 15.9  | 1.2  | 1.02E-01 |   |   |
| n339622 | 1.6   | 1.0 | 2.2   | 1.4 | 6.43E-04 | 1.9   | 1.2  | 9.91E-02 |   |   |
| n410077 | 3.1   | 1.0 | 4.4   | 1.4 | 3.72E-02 | 3.0   | -1.0 | 1.03E-02 | √ | √ |
| n341057 | 1.9   | 1.0 | 2.7   | 1.4 | 9.62E-04 | 3.0   | 1.6  | 4.65E-01 |   |   |
| n411757 | 2.6   | 1.0 | 3.7   | 1.4 | 1.52E-02 | 2.9   | 1.1  | 4.97E-02 |   |   |
| n381351 | 2.2   | 1.0 | 3.2   | 1.4 | 7.55E-04 | 2.5   | 1.1  | 4.11E-04 |   |   |
| n407022 | 2.6   | 1.0 | 3.6   | 1.4 | 3.64E-02 | 3.6   | 1.4  | 9.53E-01 |   |   |
| n406646 | 3.9   | 1.0 | 5.5   | 1.4 | 1.42E-02 | 5.2   | 1.3  | 4.77E-01 |   |   |
| n335585 | 5.9   | 1.0 | 8.4   | 1.4 | 3.11E-02 | 10.7  | 1.8  | 3.29E-02 |   |   |
| n342184 | 2.3   | 1.0 | 3.2   | 1.4 | 7.44E-03 | 2.9   | 1.3  | 3.00E-01 |   |   |
| n410586 | 9.7   | 1.0 | 13.6  | 1.4 | 1.96E-03 | 13.7  | 1.4  | 9.42E-01 |   |   |
| n339736 | 1.1   | 1.0 | 1.5   | 1.4 | 8.38E-03 | 1.6   | 1.4  | 8.45E-01 |   |   |
| n341339 | 13.9  | 1.0 | 19.7  | 1.4 | 2.08E-02 | 17.1  | 1.2  | 3.73E-01 |   |   |
| n407184 | 1.7   | 1.0 | 2.3   | 1.4 | 5.32E-03 | 2.2   | 1.3  | 5.39E-01 |   |   |
| n384227 | 6.3   | 1.0 | 8.8   | 1.4 | 4.03E-03 | 7.5   | 1.2  | 1.76E-01 |   |   |
| n342697 | 28.2  | 1.0 | 39.8  | 1.4 | 1.37E-02 | 35.5  | 1.3  | 2.87E-01 |   |   |
| n387393 | 1.1   | 1.0 | 1.5   | 1.4 | 4.89E-03 | 1.3   | 1.2  | 2.17E-01 |   |   |
| n340977 | 1.3   | 1.0 | 1.8   | 1.4 | 1.31E-02 | 1.8   | 1.4  | 9.36E-01 |   |   |
| n410117 | 3.4   | 1.0 | 4.8   | 1.4 | 2.10E-02 | 4.6   | 1.4  | 8.04E-01 |   |   |
| n407023 | 2.2   | 1.0 | 3.0   | 1.4 | 1.98E-02 | 2.3   | 1.1  | 1.44E-01 |   |   |
| n338008 | 0.8   | 1.0 | 1.1   | 1.4 | 2.50E-04 | 1.0   | 1.3  | 1.65E-01 |   |   |
| n339841 | 3.3   | 1.0 | 4.6   | 1.4 | 1.32E-02 | 3.1   | -1.1 | 1.99E-02 | √ | √ |
| n408079 | 2.6   | 1.0 | 3.7   | 1.4 | 5.70E-03 | 2.6   | 1.0  | 3.25E-02 | √ | √ |
| n406564 | 1.9   | 1.0 | 2.6   | 1.4 | 2.54E-02 | 1.9   | 1.0  | 4.38E-02 | √ | √ |
| n410486 | 0.5   | 1.0 | 0.7   | 1.4 | 1.13E-02 | 0.5   | 1.1  | 3.59E-02 |   |   |
| n333458 | 4.7   | 1.0 | 6.5   | 1.4 | 2.80E-02 | 6.4   | 1.4  | 9.11E-01 |   |   |
| n341491 | 1.6   | 1.0 | 2.3   | 1.4 | 3.04E-02 | 2.1   | 1.3  | 5.69E-01 |   |   |
| n384298 | 7.2   | 1.0 | 10.0  | 1.4 | 2.85E-03 | 11.6  | 1.6  | 2.20E-01 |   |   |
| n337816 | 2.1   | 1.0 | 3.0   | 1.4 | 2.15E-02 | 3.5   | 1.6  | 2.98E-01 |   |   |
| n407775 | 1.8   | 1.0 | 2.5   | 1.4 | 4.73E-02 | 2.6   | 1.5  | 5.90E-01 |   |   |
| n377761 | 3.5   | 1.0 | 4.9   | 1.4 | 6.26E-04 | 3.8   | 1.1  | 2.40E-02 |   |   |
| n384770 | 2.1   | 1.0 | 2.9   | 1.4 | 8.56E-03 | 2.4   | 1.2  | 1.42E-01 |   |   |
| n335646 | 6.3   | 1.0 | 8.8   | 1.4 | 1.94E-03 | 8.0   | 1.3  | 4.18E-01 |   |   |
| n342504 | 2.5   | 1.0 | 3.5   | 1.4 | 6.55E-03 | 3.3   | 1.3  | 4.42E-01 |   |   |
| n333474 | 8.6   | 1.0 | 12.0  | 1.4 | 9.21E-03 | 10.8  | 1.2  | 3.34E-01 |   |   |
| n341828 | 1.8   | 1.0 | 2.5   | 1.4 | 6.73E-03 | 2.3   | 1.3  | 4.64E-01 |   |   |
| n342328 | 1.2   | 1.0 | 1.7   | 1.4 | 2.77E-02 | 1.7   | 1.4  | 8.77E-01 |   |   |
| n382060 | 0.7   | 1.0 | 1.0   | 1.4 | 3.26E-02 | 1.0   | 1.4  | 9.62E-01 |   |   |
| n406342 | 3.2   | 1.0 | 4.5   | 1.4 | 1.84E-04 | 4.5   | 1.4  | 8.55E-01 |   |   |
| n383770 | 2.4   | 1.0 | 3.3   | 1.4 | 4.71E-03 | 3.3   | 1.4  | 9.67E-01 |   |   |
| n340297 | 140.6 | 1.0 | 195.0 | 1.4 | 4.62E-02 | 136.3 | -1.0 | 3.95E-02 | √ | √ |
| n409197 | 3.6   | 1.0 | 5.0   | 1.4 | 2.53E-02 | 6.3   | 1.7  | 5.15E-02 |   |   |
| n338898 | 1.3   | 1.0 | 1.8   | 1.4 | 3.68E-02 | 1.5   | 1.2  | 3.42E-01 |   |   |
| n338920 | 0.8   | 1.0 | 1.1   | 1.4 | 4.14E-03 | 1.0   | 1.2  | 2.64E-01 |   |   |
| n337724 | 0.8   | 1.0 | 1.2   | 1.4 | 3.60E-02 | 0.9   | 1.1  | 4.73E-02 |   |   |
| n336000 | 10.4  | 1.0 | 14.3  | 1.4 | 3.28E-02 | 22.4  | 2.2  | 1.80E-01 |   |   |
| n378971 | 3.6   | 1.0 | 5.0   | 1.4 | 3.86E-03 | 5.0   | 1.4  | 9.28E-01 |   |   |
| n383242 | 1.1   | 1.0 | 1.5   | 1.4 | 5.12E-03 | 1.1   | 1.1  | 7.60E-02 |   |   |
| n411041 | 1.0   | 1.0 | 1.4   | 1.4 | 3.24E-03 | 1.0   | -1.0 | 1.67E-02 | √ | √ |
| n339111 | 9.6   | 1.0 | 13.2  | 1.4 | 4.23E-03 | 12.3  | 1.3  | 4.71E-01 |   |   |
| n408128 | 2.6   | 1.0 | 3.6   | 1.4 | 6.21E-03 | 3.7   | 1.4  | 8.37E-01 |   |   |
| n345527 | 0.4   | 1.0 | 0.6   | 1.4 | 4.84E-02 | 0.6   | 1.3  | 6.00E-01 |   |   |
| n340632 | 1.3   | 1.0 | 1.8   | 1.4 | 3.50E-02 | 1.5   | 1.1  | 1.17E-01 |   |   |
| n409332 | 4.8   | 1.0 | 6.6   | 1.4 | 1.72E-02 | 5.6   | 1.2  | 8.68E-02 |   |   |
| n405689 | 0.6   | 1.0 | 0.8   | 1.4 | 1.35E-02 | 0.6   | 1.2  | 4.40E-01 |   |   |
| n407454 | 2.5   | 1.0 | 3.4   | 1.4 | 3.80E-02 | 3.4   | 1.4  | 9.20E-01 |   |   |
| n407781 | 1.6   | 1.0 | 2.2   | 1.4 | 2.68E-03 | 1.9   | 1.2  | 4.49E-02 |   |   |
| n342244 | 5.0   | 1.0 | 6.8   | 1.4 | 1.60E-03 | 5.5   | 1.1  | 7.13E-02 |   |   |
| n408227 | 8.2   | 1.0 | 11.2  | 1.4 | 1.85E-03 | 10.6  | 1.3  | 4.03E-01 |   |   |
| n379293 | 1.2   | 1.0 | 1.6   | 1.4 | 4.56E-02 | 1.5   | 1.3  | 6.29E-01 |   |   |
| n338175 | 4.9   | 1.0 | 6.7   | 1.4 | 4.49E-02 | 5.5   | 1.1  | 3.40E-01 |   |   |
| n345231 | 1.5   | 1.0 | 2.0   | 1.4 | 2.75E-02 | 2.1   | 1.4  | 7.32E-01 |   |   |
| n407183 | 6.7   | 1.0 | 9.1   | 1.4 | 2.74E-03 | 8.4   | 1.3  | 4.94E-01 |   |   |
| n406444 | 28.1  | 1.0 | 38.2  | 1.4 | 5.49E-03 | 37.4  | 1.3  | 7.80E-01 |   |   |
| n410790 | 0.7   | 1.0 | 0.9   | 1.4 | 2.20E-02 | 0.9   | 1.3  | 7.08E-01 |   |   |
| n408019 | 2.1   | 1.0 | 2.9   | 1.4 | 2.21E-03 | 2.7   | 1.3  | 5.82E-01 |   |   |
| n341240 | 2.8   | 1.0 | 3.8   | 1.4 | 3.10E-03 | 3.8   | 1.4  | 7.66E-01 |   |   |
| n339126 | 7.9   | 1.0 | 10.7  | 1.4 | 4.78E-02 | 8.6   | 1.1  | 1.95E-01 |   |   |
| n407074 | 8.3   | 1.0 | 11.3  | 1.4 | 8.21E-04 | 11.0  | 1.3  | 7.44E-01 |   |   |
| n342476 | 3.4   | 1.0 | 4.6   | 1.4 | 3.88E-03 | 4.6   | 1.4  | 9.88E-01 |   |   |
| n380806 | 1.3   | 1.0 | 1.8   | 1.4 | 7.13E-03 | 1.4   | 1.0  | 9.29E-02 |   |   |
| n339467 | 1.3   | 1.0 | 1.8   | 1.4 | 7.32E-03 | 1.4   | 1.1  | 1.30E-01 |   |   |
| n339763 | 2.3   | 1.0 | 3.2   | 1.4 | 4.47E-03 | 3.0   | 1.3  | 5.85E-01 |   |   |
| n340647 | 1.7   | 1.0 | 2.4   | 1.4 | 2.62E-03 | 2.4   | 1.4  | 8.00E-01 |   |   |
| n407060 | 4.0   | 1.0 | 5.4   | 1.4 | 3.88E-02 | 4.8   | 1.2  | 5.03E-01 |   |   |
| n339557 | 5.9   | 1.0 | 7.9   | 1.4 | 1.67E-03 | 7.1   | 1.2  | 8.28E-02 |   |   |
| n411756 | 10.6  | 1.0 | 14.3  | 1.3 | 1.41E-02 | 15.7  | 1.5  | 4.27E-01 |   |   |
| n341486 | 2.7   | 1.0 | 3.7   | 1.3 | 6.67E-03 | 3.3   | 1.2  | 4.21E-01 |   |   |
| n341043 | 12.0  | 1.0 | 16.2  | 1.3 | 4.25E-03 | 13.7  | 1.1  | 6.05E-02 |   |   |

|                |       |     |       |     |          |      |      |          |   |   |
|----------------|-------|-----|-------|-----|----------|------|------|----------|---|---|
| n341827        | 2.0   | 1.0 | 2.7   | 1.3 | 2.26E-03 | 2.4  | 1.2  | 4.86E-01 |   |   |
| n342335        | 3.4   | 1.0 | 4.6   | 1.3 | 9.34E-04 | 4.3  | 1.3  | 4.97E-01 |   |   |
| n409147        | 2.3   | 1.0 | 3.1   | 1.3 | 1.77E-04 | 2.4  | 1.0  | 1.94E-04 |   |   |
| n340059        | 0.9   | 1.0 | 1.2   | 1.3 | 1.77E-02 | 0.9  | 1.0  | 2.09E-02 |   |   |
| n335670        | 8.1   | 1.0 | 10.8  | 1.3 | 6.54E-03 | 10.5 | 1.3  | 7.74E-01 |   |   |
| n408249        | 7.0   | 1.0 | 9.4   | 1.3 | 1.58E-02 | 8.7  | 1.2  | 2.51E-01 |   |   |
| n335609        | 65.0  | 1.0 | 87.1  | 1.3 | 3.14E-03 | 80.4 | 1.2  | 3.94E-01 |   |   |
| n408302        | 5.0   | 1.0 | 6.7   | 1.3 | 3.70E-02 | 5.5  | 1.1  | 6.24E-02 |   |   |
| n340760        | 2.6   | 1.0 | 3.5   | 1.3 | 3.77E-03 | 3.0  | 1.1  | 3.71E-02 |   |   |
| n410523        | 0.9   | 1.0 | 1.2   | 1.3 | 7.20E-03 | 1.2  | 1.4  | 8.50E-01 |   |   |
| n339262        | 2.3   | 1.0 | 3.1   | 1.3 | 3.35E-02 | 3.1  | 1.3  | 9.65E-01 |   |   |
| n407017        | 4.3   | 1.0 | 5.8   | 1.3 | 8.45E-03 | 5.0  | 1.2  | 1.75E-01 |   |   |
| n342319        | 3.8   | 1.0 | 5.1   | 1.3 | 1.96E-02 | 4.3  | 1.1  | 2.30E-01 |   |   |
| n382329        | 3.4   | 1.0 | 4.6   | 1.3 | 3.97E-02 | 3.8  | 1.1  | 1.38E-01 |   |   |
| n409132        | 1.3   | 1.0 | 1.8   | 1.3 | 1.80E-02 | 1.9  | 1.4  | 7.14E-01 |   |   |
| n386063        | 2.2   | 1.0 | 3.0   | 1.3 | 3.50E-02 | 2.5  | 1.1  | 2.55E-01 |   |   |
| n335709        | 15.2  | 1.0 | 20.2  | 1.3 | 3.28E-03 | 19.4 | 1.3  | 6.40E-01 |   |   |
| n409315        | 7.0   | 1.0 | 9.3   | 1.3 | 4.36E-02 | 8.2  | 1.2  | 2.73E-01 |   |   |
| n406511        | 1.0   | 1.0 | 1.3   | 1.3 | 3.82E-02 | 0.8  | -1.1 | 1.56E-02 |   |   |
| n407156        | 30.3  | 1.0 | 40.2  | 1.3 | 1.97E-02 | 43.1 | 1.4  | 6.79E-01 |   |   |
| n409333        | 10.8  | 1.0 | 14.3  | 1.3 | 4.37E-02 | 13.1 | 1.2  | 4.96E-01 |   |   |
| n410677        | 16.6  | 1.0 | 22.0  | 1.3 | 4.28E-02 | 17.2 | 1.0  | 5.21E-02 |   |   |
| n380573        | 0.7   | 1.0 | 0.9   | 1.3 | 2.95E-03 | 0.8  | 1.1  | 5.43E-02 |   |   |
| n379365        | 10.2  | 1.0 | 13.5  | 1.3 | 1.52E-04 | 12.9 | 1.3  | 4.65E-01 |   |   |
| n337985        | 0.8   | 1.0 | 1.1   | 1.3 | 1.95E-02 | 1.0  | 1.2  | 5.30E-01 |   |   |
| n407977        | 11.8  | 1.0 | 15.6  | 1.3 | 4.18E-03 | 15.0 | 1.3  | 6.46E-01 |   |   |
| n405638        | 0.9   | 1.0 | 1.2   | 1.3 | 3.42E-02 | 1.2  | 1.3  | 8.21E-01 |   |   |
| n411750        | 6.6   | 1.0 | 8.7   | 1.3 | 6.26E-03 | 6.6  | 1.0  | 1.39E-02 |   |   |
| n407178        | 21.1  | 1.0 | 27.8  | 1.3 | 6.33E-03 | 26.4 | 1.2  | 5.27E-01 |   |   |
| n338183        | 1.1   | 1.0 | 1.5   | 1.3 | 3.30E-02 | 1.6  | 1.4  | 5.41E-01 |   |   |
| n339370        | 0.6   | 1.0 | 0.8   | 1.3 | 3.14E-02 | 0.8  | 1.3  | 8.04E-01 |   |   |
| n406191        | 1.7   | 1.0 | 2.3   | 1.3 | 3.29E-02 | 1.8  | 1.0  | 6.19E-02 |   |   |
| n410038        | 2.1   | 1.0 | 2.7   | 1.3 | 2.51E-02 | 2.9  | 1.4  | 5.65E-01 |   |   |
| n409289        | 62.4  | 1.0 | 81.7  | 1.3 | 7.79E-04 | 76.6 | 1.2  | 2.33E-01 |   |   |
| n406245        | 3.6   | 1.0 | 4.7   | 1.3 | 2.40E-02 | 3.4  | -1.1 | 9.59E-02 |   |   |
| n340374        | 1.9   | 1.0 | 2.5   | 1.3 | 9.68E-03 | 2.6  | 1.4  | 7.03E-01 |   |   |
| n410453        | 2.0   | 1.0 | 2.6   | 1.3 | 1.41E-02 | 2.7  | 1.4  | 3.86E-01 |   |   |
| n335651        | 10.9  | 1.0 | 14.2  | 1.3 | 1.92E-02 | 12.5 | 1.1  | 2.06E-01 |   |   |
| n339003        | 3.3   | 1.0 | 4.4   | 1.3 | 8.12E-03 | 4.1  | 1.2  | 3.51E-01 |   |   |
| n338715        | 2.0   | 1.0 | 2.6   | 1.3 | 1.13E-02 | 2.2  | 1.1  | 9.00E-02 |   |   |
| n335627        | 9.3   | 1.0 | 12.1  | 1.3 | 1.85E-02 | 11.9 | 1.3  | 8.97E-01 |   |   |
| n409550        | 35.3  | 1.0 | 45.9  | 1.3 | 2.66E-03 | 45.0 | 1.3  | 8.25E-01 |   |   |
| n342928        | 2.4   | 1.0 | 3.1   | 1.3 | 4.75E-02 | 2.6  | 1.1  | 1.44E-01 |   |   |
| TCONS_00023382 | 6.0   | 1.0 | 7.8   | 1.3 | 7.62E-03 | 6.8  | 1.1  | 5.24E-02 |   |   |
| TCONS_00001938 | 1.8   | 1.0 | 2.3   | 1.3 | 2.56E-02 | 2.0  | 1.1  | 1.68E-01 |   |   |
| n382502        | 8.6   | 1.0 | 11.2  | 1.3 | 1.50E-02 | 8.1  | -1.1 | 9.10E-03 | ∨ | ∨ |
| n409268        | 107.3 | 1.0 | 139.1 | 1.3 | 1.28E-02 | 99.3 | -1.1 | 5.03E-03 | ∨ | ∨ |
| n409080        | 2.6   | 1.0 | 3.3   | 1.3 | 4.27E-02 | 3.9  | 1.5  | 1.18E-01 |   |   |
| n408138        | 8.4   | 1.0 | 10.9  | 1.3 | 1.98E-03 | 9.5  | 1.1  | 2.66E-02 |   |   |
| n406657        | 3.0   | 1.0 | 3.9   | 1.3 | 2.90E-02 | 3.2  | 1.1  | 9.84E-02 |   |   |
| n410112        | 2.8   | 1.0 | 3.7   | 1.3 | 5.87E-04 | 3.2  | 1.1  | 3.46E-02 |   |   |
| n339786        | 1.5   | 1.0 | 2.0   | 1.3 | 2.19E-02 | 1.8  | 1.1  | 1.76E-01 |   |   |
| n381184        | 1.9   | 1.0 | 2.4   | 1.3 | 2.59E-03 | 2.2  | 1.2  | 4.46E-01 |   |   |
| n342023        | 3.0   | 1.0 | 3.9   | 1.3 | 1.74E-02 | 2.9  | -1.0 | 1.75E-03 |   |   |
| n339276        | 3.2   | 1.0 | 4.1   | 1.3 | 1.51E-02 | 4.3  | 1.3  | 7.13E-01 |   |   |
| n383129        | 5.4   | 1.0 | 6.9   | 1.3 | 1.12E-02 | 7.1  | 1.3  | 6.97E-01 |   |   |
| n337860        | 3.0   | 1.0 | 3.8   | 1.3 | 3.12E-02 | 3.5  | 1.2  | 3.64E-01 |   |   |
| n410143        | 2.9   | 1.0 | 3.8   | 1.3 | 1.19E-03 | 3.2  | 1.1  | 1.85E-01 |   |   |
| n334562        | 13.2  | 1.0 | 16.9  | 1.3 | 3.67E-02 | 17.2 | 1.3  | 7.98E-01 |   |   |
| n407745        | 9.1   | 1.0 | 11.6  | 1.3 | 3.49E-03 | 9.5  | 1.0  | 1.26E-01 |   |   |
| n341436        | 7.4   | 1.0 | 9.5   | 1.3 | 2.80E-02 | 10.4 | 1.4  | 5.17E-01 |   |   |
| n410326        | 7.7   | 1.0 | 9.9   | 1.3 | 4.33E-02 | 9.3  | 1.2  | 3.68E-01 |   |   |
| n342111        | 7.7   | 1.0 | 9.8   | 1.3 | 2.09E-02 | 9.2  | 1.2  | 3.64E-01 |   |   |
| n407984        | 9.1   | 1.0 | 11.6  | 1.3 | 7.60E-03 | 11.0 | 1.2  | 4.41E-01 |   |   |
| n341743        | 7.1   | 1.0 | 9.1   | 1.3 | 8.11E-03 | 7.7  | 1.1  | 6.52E-02 |   |   |
| n384936        | 1.4   | 1.0 | 1.8   | 1.3 | 4.49E-02 | 1.7  | 1.2  | 5.86E-01 |   |   |
| n406422        | 1.4   | 1.0 | 1.8   | 1.3 | 3.00E-02 | 1.7  | 1.2  | 7.41E-01 |   |   |
| n407760        | 10.3  | 1.0 | 13.1  | 1.3 | 1.83E-03 | 11.2 | 1.1  | 1.13E-01 |   |   |
| n408198        | 3.3   | 1.0 | 4.2   | 1.3 | 4.27E-03 | 3.7  | 1.1  | 2.85E-01 |   |   |
| n410890        | 0.7   | 1.0 | 0.9   | 1.3 | 3.15E-02 | 0.8  | 1.2  | 4.00E-01 |   |   |
| n405975        | 3.1   | 1.0 | 3.9   | 1.3 | 2.91E-02 | 3.6  | 1.2  | 2.88E-01 |   |   |
| n409286        | 4.8   | 1.0 | 6.1   | 1.3 | 1.09E-02 | 5.2  | 1.1  | 5.98E-02 |   |   |
| n341178        | 1.4   | 1.0 | 1.8   | 1.3 | 4.67E-02 | 1.3  | -1.1 | 5.85E-02 |   |   |
| n409269        | 2.5   | 1.0 | 3.2   | 1.3 | 1.30E-03 | 2.9  | 1.1  | 2.66E-01 |   |   |
| n339354        | 22.4  | 1.0 | 28.5  | 1.3 | 1.75E-02 | 28.0 | 1.3  | 8.62E-01 |   |   |
| n338215        | 1.2   | 1.0 | 1.5   | 1.3 | 4.54E-02 | 1.4  | 1.2  | 7.96E-01 |   |   |
| n337967        | 11.3  | 1.0 | 14.4  | 1.3 | 3.29E-02 | 15.4 | 1.4  | 5.36E-01 |   |   |
| n407825        | 1.1   | 1.0 | 1.4   | 1.3 | 2.95E-02 | 1.3  | 1.2  | 3.10E-01 |   |   |
| n411665        | 4.0   | 1.0 | 5.1   | 1.3 | 3.50E-02 | 4.8  | 1.2  | 4.12E-01 |   |   |
| n342494        | 18.2  | 1.0 | 23.1  | 1.3 | 5.26E-03 | 18.9 | 1.0  | 7.26E-02 |   |   |
| n381629        | 0.8   | 1.0 | 1.0   | 1.3 | 3.85E-02 | 1.0  | 1.3  | 9.87E-01 |   |   |
| n339357        | 4.2   | 1.0 | 5.3   | 1.3 | 3.11E-02 | 4.3  | 1.0  | 1.35E-01 |   |   |
| n409179        | 1.9   | 1.0 | 2.4   | 1.3 | 3.67E-02 | 1.9  | -1.0 | 8.55E-02 |   |   |
| n340556        | 2.2   | 1.0 | 2.8   | 1.3 | 9.42E-03 | 2.1  | -1.0 | 8.44E-02 |   |   |

|                |       |     |       |      |          |       |      |          |   |   |
|----------------|-------|-----|-------|------|----------|-------|------|----------|---|---|
| n411654        | 3.2   | 1.0 | 4.1   | 1.3  | 1.58E-02 | 3.4   | 1.0  | 1.79E-01 |   |   |
| n335669        | 6.9   | 1.0 | 8.7   | 1.3  | 1.72E-02 | 8.3   | 1.2  | 6.16E-01 |   |   |
| n406823        | 4.3   | 1.0 | 5.5   | 1.3  | 1.19E-03 | 5.4   | 1.2  | 8.30E-01 |   |   |
| n405453        | 2.0   | 1.0 | 2.5   | 1.3  | 1.24E-02 | 2.1   | 1.1  | 8.56E-02 |   |   |
| n406149        | 21.7  | 1.0 | 27.3  | 1.3  | 1.24E-02 | 22.9  | 1.1  | 8.57E-02 |   |   |
| n410119        | 5.8   | 1.0 | 7.3   | 1.3  | 3.42E-03 | 6.4   | 1.1  | 2.19E-01 |   |   |
| n409261        | 9.4   | 1.0 | 11.8  | 1.3  | 2.57E-02 | 10.1  | 1.1  | 7.57E-02 |   |   |
| n407171        | 3.4   | 1.0 | 4.3   | 1.3  | 7.80E-03 | 3.6   | 1.0  | 1.18E-01 |   |   |
| n335636        | 10.3  | 1.0 | 12.9  | 1.3  | 5.99E-03 | 11.6  | 1.1  | 1.50E-01 |   |   |
| n407832        | 6.4   | 1.0 | 8.1   | 1.3  | 4.00E-02 | 8.7   | 1.4  | 5.61E-01 |   |   |
| n406664        | 4.1   | 1.0 | 5.1   | 1.3  | 2.49E-02 | 4.8   | 1.2  | 5.21E-01 |   |   |
| n341680        | 0.4   | 1.0 | 0.5   | 1.3  | 4.15E-03 | 0.6   | 1.6  | 1.43E-01 |   |   |
| n385291        | 1.7   | 1.0 | 2.2   | 1.3  | 3.56E-02 | 2.1   | 1.2  | 6.45E-01 |   |   |
| n409184        | 4.4   | 1.0 | 5.5   | 1.3  | 4.97E-03 | 4.6   | 1.1  | 1.04E-01 |   |   |
| n411020        | 1.1   | 1.0 | 1.4   | 1.3  | 1.49E-02 | 1.2   | 1.1  | 1.53E-01 |   |   |
| n338076        | 35.8  | 1.0 | 44.7  | 1.3  | 9.61E-03 | 43.3  | 1.2  | 5.98E-01 |   |   |
| n406628        | 10.0  | 1.0 | 12.5  | 1.3  | 1.66E-02 | 11.5  | 1.2  | 2.73E-01 |   |   |
| n342047        | 4.3   | 1.0 | 5.4   | 1.2  | 2.98E-02 | 4.3   | -1.0 | 7.44E-02 |   |   |
| n342404        | 2.6   | 1.0 | 3.2   | 1.2  | 2.72E-02 | 2.8   | 1.1  | 1.85E-01 |   |   |
| n409240        | 3.3   | 1.0 | 4.1   | 1.2  | 1.86E-02 | 4.0   | 1.2  | 4.08E-01 |   |   |
| n410472        | 1.9   | 1.0 | 2.3   | 1.2  | 7.63E-03 | 1.9   | 1.0  | 6.91E-02 |   |   |
| n406706        | 4.7   | 1.0 | 5.9   | 1.2  | 1.23E-02 | 4.7   | -1.0 | 8.66E-03 |   |   |
| n409617        | 4.5   | 1.0 | 5.6   | 1.2  | 4.11E-02 | 5.7   | 1.3  | 7.39E-01 |   |   |
| n341229        | 1.1   | 1.0 | 1.4   | 1.2  | 4.25E-02 | 1.4   | 1.2  | 9.20E-01 |   |   |
| n338219        | 10.8  | 1.0 | 13.4  | 1.2  | 2.42E-03 | 11.6  | 1.1  | 9.02E-02 |   |   |
| n383697        | 4.2   | 1.0 | 5.2   | 1.2  | 3.80E-02 | 5.0   | 1.2  | 6.56E-01 |   |   |
| n406602        | 10.4  | 1.0 | 12.9  | 1.2  | 2.17E-02 | 11.3  | 1.1  | 1.36E-01 |   |   |
| n406618        | 2.8   | 1.0 | 3.4   | 1.2  | 4.35E-02 | 3.0   | 1.1  | 7.05E-02 |   |   |
| n409298        | 23.1  | 1.0 | 28.6  | 1.2  | 3.89E-02 | 28.0  | 1.2  | 8.36E-01 |   |   |
| n411694        | 24.7  | 1.0 | 30.5  | 1.2  | 2.74E-03 | 32.1  | 1.3  | 5.17E-01 |   |   |
| n335757        | 14.2  | 1.0 | 17.6  | 1.2  | 4.26E-02 | 19.8  | 1.4  | 1.05E-01 |   |   |
| n406954        | 25.1  | 1.0 | 31.1  | 1.2  | 1.58E-02 | 26.3  | 1.0  | 6.80E-02 |   |   |
| n410787        | 7.4   | 1.0 | 9.1   | 1.2  | 2.82E-03 | 7.7   | 1.0  | 6.07E-02 |   |   |
| n385685        | 4.3   | 1.0 | 5.3   | 1.2  | 6.63E-03 | 4.5   | 1.0  | 5.54E-02 |   |   |
| n345594        | 3.1   | 1.0 | 3.8   | 1.2  | 1.64E-02 | 3.8   | 1.2  | 9.61E-01 |   |   |
| n409625        | 13.7  | 1.0 | 16.8  | 1.2  | 1.37E-03 | 18.4  | 1.3  | 2.68E-01 |   |   |
| n408312        | 4.3   | 1.0 | 5.3   | 1.2  | 4.93E-02 | 4.3   | -1.0 | 9.00E-02 |   |   |
| n409517        | 8.9   | 1.0 | 10.9  | 1.2  | 3.26E-03 | 9.9   | 1.1  | 2.12E-01 |   |   |
| n410731        | 9.3   | 1.0 | 11.4  | 1.2  | 7.33E-03 | 10.4  | 1.1  | 1.92E-01 |   |   |
| n407229        | 3.3   | 1.0 | 4.0   | 1.2  | 2.15E-02 | 3.4   | 1.0  | 1.54E-01 |   |   |
| n406446        | 4.6   | 1.0 | 5.7   | 1.2  | 1.20E-02 | 5.2   | 1.1  | 4.51E-01 |   |   |
| n410476        | 17.4  | 1.0 | 21.3  | 1.2  | 3.24E-02 | 20.6  | 1.2  | 7.51E-01 |   |   |
| n407453        | 2.7   | 1.0 | 3.4   | 1.2  | 1.95E-02 | 2.9   | 1.0  | 1.21E-01 |   |   |
| n407908        | 7.3   | 1.0 | 9.0   | 1.2  | 2.40E-02 | 8.0   | 1.1  | 2.56E-01 |   |   |
| n410960        | 16.2  | 1.0 | 19.8  | 1.2  | 4.23E-03 | 17.9  | 1.1  | 5.71E-02 |   |   |
| n338180        | 0.9   | 1.0 | 1.2   | 1.2  | 4.36E-02 | 1.0   | 1.1  | 3.68E-01 |   |   |
| n407266        | 5.5   | 1.0 | 6.7   | 1.2  | 1.32E-02 | 5.4   | -1.0 | 3.56E-02 |   |   |
| n410123        | 2.1   | 1.0 | 2.5   | 1.2  | 4.21E-02 | 1.9   | -1.1 | 1.99E-02 |   |   |
| n338368        | 2.9   | 1.0 | 3.6   | 1.2  | 3.50E-02 | 3.6   | 1.2  | 8.72E-01 |   |   |
| n406416        | 46.0  | 1.0 | 56.1  | 1.2  | 5.66E-04 | 54.2  | 1.2  | 6.30E-01 |   |   |
| n409338        | 15.3  | 1.0 | 18.6  | 1.2  | 6.53E-03 | 15.2  | -1.0 | 2.02E-02 |   |   |
| n382510        | 1.8   | 1.0 | 2.2   | 1.2  | 2.01E-02 | 2.2   | 1.2  | 7.97E-01 |   |   |
| n411747        | 6.7   | 1.0 | 8.1   | 1.2  | 4.90E-02 | 6.1   | -1.1 | 6.23E-02 |   |   |
| n406968        | 4.6   | 1.0 | 5.7   | 1.2  | 1.05E-02 | 5.1   | 1.1  | 1.12E-01 |   |   |
| n411640        | 7.9   | 1.0 | 9.6   | 1.2  | 1.64E-03 | 8.9   | 1.1  | 1.79E-01 |   |   |
| n410441        | 4.7   | 1.0 | 5.7   | 1.2  | 2.02E-02 | 4.9   | 1.1  | 1.97E-01 |   |   |
| n408154        | 12.1  | 1.0 | 14.7  | 1.2  | 4.55E-03 | 12.9  | 1.1  | 8.60E-02 |   |   |
| n408081        | 3.2   | 1.0 | 3.9   | 1.2  | 3.29E-02 | 3.3   | 1.0  | 2.04E-01 |   |   |
| n410028        | 9.5   | 1.0 | 11.5  | 1.2  | 3.34E-02 | 9.5   | 1.0  | 4.51E-02 |   |   |
| n411656        | 3.7   | 1.0 | 4.5   | 1.2  | 2.58E-02 | 3.9   | 1.0  | 1.81E-02 |   |   |
| n342837        | 22.1  | 1.0 | 26.7  | 1.2  | 2.62E-04 | 25.1  | 1.1  | 2.52E-01 |   |   |
| n344601        | 2.0   | 1.0 | 2.4   | 1.2  | 2.57E-02 | 2.2   | 1.1  | 3.90E-01 |   |   |
| n342415        | 9.5   | 1.0 | 11.5  | 1.2  | 2.65E-02 | 11.7  | 1.2  | 7.92E-01 |   |   |
| n385777        | 9.6   | 1.0 | 11.6  | 1.2  | 2.03E-02 | 10.0  | 1.0  | 1.01E-01 |   |   |
| n411675        | 3.8   | 1.0 | 4.5   | 1.2  | 1.58E-02 | 3.8   | 1.0  | 2.65E-02 |   |   |
| n410743        | 11.5  | 1.0 | 13.8  | 1.2  | 1.93E-03 | 12.4  | 1.1  | 1.39E-01 |   |   |
| n410537        | 14.4  | 1.0 | 17.3  | 1.2  | 2.59E-02 | 16.8  | 1.2  | 6.68E-01 |   |   |
| n410111        | 3.4   | 1.0 | 4.0   | 1.2  | 2.89E-02 | 3.9   | 1.2  | 6.45E-01 |   |   |
| n409395        | 8.8   | 1.0 | 10.5  | 1.2  | 1.78E-02 | 9.2   | 1.0  | 8.86E-02 |   |   |
| n406196        | 1.5   | 1.0 | 1.8   | 1.2  | 3.04E-02 | 1.6   | 1.1  | 7.66E-02 |   |   |
| n410007        | 13.4  | 1.0 | 16.1  | 1.2  | 9.81E-04 | 16.5  | 1.2  | 8.05E-01 |   |   |
| n411603        | 173.3 | 1.0 | 137.6 | -1.3 | 1.87E-02 | 130.7 | -1.3 | 6.44E-01 |   |   |
| n333016        | 4.9   | 1.0 | 3.8   | -1.3 | 3.49E-02 | 3.6   | -1.4 | 7.04E-01 |   |   |
| n410027        | 20.3  | 1.0 | 15.6  | -1.3 | 7.08E-05 | 14.1  | -1.4 | 2.53E-01 |   |   |
| TCONS_00008904 | 2.5   | 1.0 | 1.9   | -1.3 | 2.85E-02 | 2.2   | -1.1 | 4.41E-01 |   |   |
| n342760        | 5.1   | 1.0 | 3.8   | -1.3 | 1.09E-02 | 4.3   | -1.2 | 2.37E-01 |   |   |
| n411692        | 2.9   | 1.0 | 2.1   | -1.3 | 4.05E-02 | 2.2   | -1.3 | 7.47E-01 |   |   |
| n342706        | 331.2 | 1.0 | 248.9 | -1.3 | 1.44E-02 | 215.1 | -1.5 | 2.10E-01 |   |   |
| n383233        | 4.8   | 1.0 | 3.6   | -1.3 | 4.19E-02 | 5.2   | 1.1  | 5.16E-03 | √ | √ |
| n381031        | 7.0   | 1.0 | 5.2   | -1.3 | 2.28E-02 | 4.8   | -1.5 | 5.15E-01 |   |   |
| n424067        | 2.1   | 1.0 | 1.5   | -1.4 | 5.15E-03 | 1.8   | -1.1 | 5.50E-02 |   |   |
| n339569        | 6.6   | 1.0 | 4.9   | -1.4 | 4.40E-03 | 5.6   | -1.2 | 3.78E-02 |   |   |
| n410886        | 5.5   | 1.0 | 4.1   | -1.4 | 4.67E-02 | 3.6   | -1.5 | 4.97E-01 |   |   |
| n410159        | 5.7   | 1.0 | 4.2   | -1.4 | 2.37E-02 | 3.8   | -1.5 | 4.61E-01 |   |   |

|                |        |     |        |      |          |        |       |          |   |   |
|----------------|--------|-----|--------|------|----------|--------|-------|----------|---|---|
| n340733        | 12.8   | 1.0 | 9.3    | -1.4 | 7.35E-04 | 11.0   | -1.2  | 1.30E-01 |   |   |
| n407211        | 1.4    | 1.0 | 1.0    | -1.4 | 3.22E-02 | 1.5    | 1.0   | 2.48E-02 | ∇ | ∇ |
| n407076        | 25.3   | 1.0 | 18.3   | -1.4 | 6.08E-04 | 16.4   | -1.5  | 3.63E-01 |   |   |
| n342114        | 685.7  | 1.0 | 492.3  | -1.4 | 2.85E-04 | 511.3  | -1.3  | 7.55E-01 |   |   |
| n339657        | 2.8    | 1.0 | 2.0    | -1.4 | 2.16E-02 | 1.9    | -1.5  | 8.18E-01 |   |   |
| n343070        | 93.8   | 1.0 | 65.7   | -1.4 | 3.91E-02 | 60.9   | -1.5  | 5.63E-01 |   |   |
| n406583        | 4.8    | 1.0 | 3.4    | -1.4 | 2.93E-02 | 2.7    | -1.8  | 6.36E-02 |   |   |
| n409105        | 1.6    | 1.0 | 1.1    | -1.4 | 4.60E-04 | 1.1    | -1.5  | 9.09E-01 |   |   |
| n338787        | 9.7    | 1.0 | 6.7    | -1.4 | 5.02E-03 | 8.1    | -1.2  | 1.03E-01 |   |   |
| n344791        | 2.4    | 1.0 | 1.7    | -1.5 | 1.29E-03 | 1.5    | -1.6  | 5.36E-01 |   |   |
| n342202        | 2987.7 | 1.0 | 2042.8 | -1.5 | 4.70E-02 | 2404.2 | -1.2  | 1.59E-01 |   |   |
| n345856        | 0.7    | 1.0 | 0.5    | -1.5 | 4.85E-02 | 0.6    | -1.2  | 3.62E-01 |   |   |
| n340497        | 1.8    | 1.0 | 1.2    | -1.5 | 3.28E-02 | 1.7    | -1.0  | 1.06E-01 |   |   |
| n341899        | 0.7    | 1.0 | 0.4    | -1.5 | 3.88E-02 | 0.6    | -1.2  | 4.03E-01 |   |   |
| n339261        | 1.8    | 1.0 | 1.2    | -1.5 | 3.23E-02 | 1.6    | -1.1  | 3.02E-01 |   |   |
| n340411        | 2.7    | 1.0 | 1.8    | -1.5 | 9.53E-03 | 1.8    | -1.5  | 9.83E-01 |   |   |
| n340265        | 5.3    | 1.0 | 3.5    | -1.5 | 2.75E-02 | 6.9    | 1.3   | 3.30E-02 |   |   |
| n339249        | 1.4    | 1.0 | 0.9    | -1.5 | 4.53E-02 | 1.0    | -1.4  | 6.23E-01 |   |   |
| n337710        | 9.8    | 1.0 | 6.4    | -1.5 | 1.72E-02 | 7.1    | -1.4  | 2.38E-01 |   |   |
| n385535        | 11.0   | 1.0 | 7.2    | -1.5 | 4.83E-03 | 7.5    | -1.5  | 7.03E-01 |   |   |
| n409341        | 11.2   | 1.0 | 7.3    | -1.5 | 1.47E-04 | 6.9    | -1.6  | 7.44E-01 |   |   |
| n341701        | 1.1    | 1.0 | 0.7    | -1.6 | 4.79E-02 | 0.8    | -1.3  | 5.08E-01 |   |   |
| n344454        | 3.1    | 1.0 | 2.0    | -1.6 | 2.11E-02 | 2.2    | -1.4  | 5.92E-01 |   |   |
| n340532        | 1.3    | 1.0 | 0.8    | -1.6 | 5.77E-03 | 0.8    | -1.7  | 8.75E-01 |   |   |
| n341455        | 13.5   | 1.0 | 8.5    | -1.6 | 9.08E-03 | 6.2    | -2.2  | 1.94E-01 |   |   |
| n406139        | 8.8    | 1.0 | 5.5    | -1.6 | 6.63E-03 | 6.2    | -1.4  | 5.89E-01 |   |   |
| n342206        | 14.1   | 1.0 | 8.7    | -1.6 | 2.82E-03 | 9.3    | -1.5  | 6.33E-01 |   |   |
| n340843        | 1.0    | 1.0 | 0.6    | -1.6 | 1.68E-03 | 0.7    | -1.3  | 4.11E-01 |   |   |
| n342205        | 7.1    | 1.0 | 4.3    | -1.6 | 1.74E-02 | 4.0    | -1.8  | 6.48E-01 |   |   |
| n342839        | 3.3    | 1.0 | 2.0    | -1.7 | 4.45E-02 | 2.0    | -1.7  | 9.98E-01 |   |   |
| n410164        | 1.9    | 1.0 | 1.1    | -1.7 | 4.42E-02 | 1.3    | -1.5  | 6.67E-01 |   |   |
| n378134        | 5.7    | 1.0 | 3.4    | -1.7 | 9.50E-03 | 4.7    | -1.2  | 8.04E-02 |   |   |
| n381030        | 10.6   | 1.0 | 6.3    | -1.7 | 1.67E-04 | 7.2    | -1.5  | 4.73E-01 |   |   |
| n408908        | 43.5   | 1.0 | 25.8   | -1.7 | 1.20E-02 | 30.6   | -1.4  | 7.90E-02 |   |   |
| n341343        | 8.5    | 1.0 | 5.0    | -1.7 | 5.24E-03 | 5.2    | -1.6  | 8.51E-01 |   |   |
| n381766        | 1.7    | 1.0 | 1.0    | -1.7 | 1.39E-02 | 1.1    | -1.6  | 7.72E-01 |   |   |
| TCONS_00029435 | 1.2    | 1.0 | 0.7    | -1.7 | 4.72E-03 | 0.7    | -1.7  | 8.46E-01 |   |   |
| n338582        | 0.6    | 1.0 | 0.4    | -1.7 | 2.41E-02 | 0.5    | -1.2  | 1.81E-01 |   |   |
| n339038        | 1.2    | 1.0 | 0.7    | -1.7 | 3.31E-02 | 0.9    | -1.4  | 3.23E-01 |   |   |
| n342843        | 3.8    | 1.0 | 2.2    | -1.7 | 1.09E-02 | 3.1    | -1.2  | 2.30E-01 |   |   |
| n408252        | 1.0    | 1.0 | 0.5    | -1.7 | 6.29E-03 | 0.7    | -1.4  | 4.58E-01 |   |   |
| n343066        | 219.2  | 1.0 | 124.1  | -1.8 | 3.31E-02 | 151.0  | -1.5  | 7.97E-02 |   |   |
| n338279        | 17.3   | 1.0 | 9.8    | -1.8 | 2.60E-04 | 9.2    | -1.9  | 6.28E-01 |   |   |
| n338142        | 5.8    | 1.0 | 3.3    | -1.8 | 3.55E-03 | 3.9    | -1.5  | 1.90E-01 |   |   |
| n340209        | 0.8    | 1.0 | 0.4    | -1.8 | 3.23E-02 | 0.4    | -2.0  | 7.52E-01 |   |   |
| n333334        | 10.4   | 1.0 | 5.8    | -1.8 | 6.29E-04 | 7.4    | -1.4  | 3.89E-01 |   |   |
| n378520        | 0.7    | 1.0 | 0.4    | -1.8 | 4.76E-02 | 0.9    | 1.3   | 3.18E-03 |   |   |
| n342938        | 1.2    | 1.0 | 0.7    | -1.8 | 3.39E-02 | 1.7    | 1.4   | 8.53E-02 |   |   |
| n340150        | 1.4    | 1.0 | 0.7    | -1.9 | 1.68E-02 | 0.7    | -2.1  | 7.19E-01 |   |   |
| n337693        | 0.9    | 1.0 | 0.5    | -1.9 | 1.60E-02 | 0.6    | -1.6  | 6.42E-01 |   |   |
| n385670        | 0.7    | 1.0 | 0.4    | -1.9 | 5.71E-03 | 0.4    | -2.0  | 9.14E-01 |   |   |
| n336898        | 3.2    | 1.0 | 1.6    | -1.9 | 4.84E-02 | 1.1    | -2.9  | 3.99E-01 |   |   |
| n346528        | 1.6    | 1.0 | 0.8    | -2.0 | 2.72E-02 | 0.5    | -3.6  | 3.01E-01 |   |   |
| n340147        | 1.0    | 1.0 | 0.5    | -2.0 | 8.27E-03 | 0.6    | -1.8  | 7.63E-01 |   |   |
| n410608        | 5.6    | 1.0 | 2.8    | -2.0 | 1.42E-02 | 2.4    | -2.3  | 3.95E-01 |   |   |
| n408111        | 0.8    | 1.0 | 0.4    | -2.0 | 1.40E-02 | 0.3    | -2.5  | 2.02E-01 |   |   |
| n333357        | 1.2    | 1.0 | 0.6    | -2.0 | 3.22E-02 | 0.8    | -1.4  | 4.22E-01 |   |   |
| TCONS_00016476 | 1.3    | 1.0 | 0.6    | -2.1 | 4.54E-03 | 1.2    | -1.1  | 1.19E-01 |   |   |
| n338544        | 0.9    | 1.0 | 0.4    | -2.1 | 2.21E-02 | 0.7    | -1.4  | 3.29E-02 |   | ∇ |
| n332982        | 1.3    | 1.0 | 0.6    | -2.1 | 5.74E-03 | 0.9    | -1.5  | 1.14E-01 |   |   |
| n337293        | 7.1    | 1.0 | 3.4    | -2.1 | 1.06E-02 | 5.4    | -1.3  | 3.98E-02 |   | ∇ |
| n333395        | 0.6    | 1.0 | 0.3    | -2.2 | 3.37E-02 | 0.6    | -1.1  | 1.54E-01 |   |   |
| n340146        | 3.9    | 1.0 | 1.8    | -2.2 | 9.28E-03 | 2.3    | -1.7  | 4.42E-01 |   |   |
| n409244        | 38.2   | 1.0 | 17.5   | -2.2 | 1.71E-04 | 19.7   | -1.9  | 5.26E-01 |   |   |
| TCONS_00004193 | 0.7    | 1.0 | 0.3    | -2.2 | 2.95E-02 | 0.4    | -1.8  | 5.66E-01 |   |   |
| n341751        | 0.9    | 1.0 | 0.4    | -2.2 | 3.70E-02 | 0.7    | -1.3  | 3.01E-02 |   | ∇ |
| TCONS_00015564 | 2.1    | 1.0 | 0.9    | -2.3 | 9.39E-03 | 1.1    | -1.8  | 3.38E-01 |   |   |
| TCONS_00008443 | 0.6    | 1.0 | 0.3    | -2.3 | 2.90E-02 | 0.2    | -3.0  | 5.90E-01 |   |   |
| TCONS_00015553 | 0.9    | 1.0 | 0.4    | -2.5 | 1.20E-02 | 0.4    | -2.6  | 9.33E-01 |   |   |
| n385559        | 4.3    | 1.0 | 1.7    | -2.5 | 5.44E-04 | 2.6    | -1.7  | 4.61E-02 |   | ∇ |
| TCONS_00016948 | 4.2    | 1.0 | 1.7    | -2.6 | 3.00E-03 | 2.3    | -1.8  | 1.95E-01 |   |   |
| n334005        | 1.2    | 1.0 | 0.4    | -2.6 | 9.35E-03 | 0.4    | -3.1  | 5.88E-01 |   |   |
| n337853        | 2.2    | 1.0 | 0.8    | -2.7 | 1.09E-02 | 1.0    | -2.3  | 3.60E-01 |   |   |
| n342555        | 2.8    | 1.0 | 1.0    | -2.8 | 4.27E-02 | 0.3    | -10.8 | 1.25E-01 |   |   |
| n346121        | 3.2    | 1.0 | 1.1    | -2.8 | 6.47E-06 | 1.6    | -2.1  | 1.79E-01 |   |   |
| n384299        | 0.8    | 1.0 | 0.3    | -2.8 | 5.33E-03 | 0.3    | -2.6  | 8.23E-01 |   |   |
| n385557        | 0.7    | 1.0 | 0.2    | -2.9 | 1.88E-02 | 0.3    | -2.0  | 4.91E-01 |   |   |
| n346292        | 0.4    | 1.0 | 0.1    | -3.0 | 2.35E-02 | 0.3    | -1.5  | 3.84E-01 |   |   |
| n3894          | 1.9    | 1.0 | 0.6    | -3.0 | 1.90E-03 | 1.4    | -1.3  | 5.39E-02 |   |   |
| n379769        | 1.7    | 1.0 | 0.5    | -3.2 | 3.97E-02 | 1.1    | -1.5  | 1.75E-01 |   |   |
| n380635        | 0.6    | 1.0 | 0.2    | -3.2 | 6.64E-03 | 0.3    | -1.7  | 2.93E-01 |   |   |
| n339157        | 2.6    | 1.0 | 0.8    | -3.4 | 8.86E-03 | 0.7    | -3.6  | 8.30E-01 |   |   |
| n338599        | 0.7    | 1.0 | 0.2    | -3.9 | 4.68E-02 | 0.1    | -13.9 | 6.08E-02 |   |   |
| n339156        | 1.0    | 1.0 | 0.2    | -4.1 | 7.15E-03 | 0.9    | -1.1  | 1.71E-02 | ∇ | ∇ |



|                |     |     |     |        |          |     |       |          |  |   |
|----------------|-----|-----|-----|--------|----------|-----|-------|----------|--|---|
| n411751        | 2.6 | 1.0 | 0.6 | -4.1   | 7.32E-04 | 0.9 | -2.8  | 2.76E-01 |  |   |
| n333323        | 1.0 | 1.0 | 0.2 | -4.2   | 4.76E-02 | 0.4 | -2.2  | 4.11E-01 |  |   |
| TCONS_00012631 | 0.6 | 1.0 | 0.1 | -4.8   | 5.47E-03 | 0.2 | -2.5  | 1.27E-01 |  |   |
| TCONS_00023889 | 0.7 | 1.0 | 0.1 | -5.0   | 1.98E-02 | 0.5 | -1.3  | 3.79E-01 |  |   |
| TCONS_00009461 | 0.7 | 1.0 | 0.1 | -5.7   | 4.09E-02 | 0.2 | -3.4  | 5.62E-01 |  |   |
| n409074        | 0.9 | 1.0 | 0.1 | -6.9   | 1.69E-02 | 0.2 | -3.6  | 3.91E-02 |  | v |
| TCONS_00024424 | 3.1 | 1.0 | 0.4 | -7.4   | 3.32E-02 | 0.3 | -10.9 | 2.82E-01 |  |   |
| n405862        | 0.5 | 1.0 | 0.1 | -7.4   | 4.09E-02 | 0.1 | -6.4  | 7.69E-01 |  |   |
| n339715        | 0.3 | 1.0 | 0.0 | -7.6   | 1.39E-03 | 0.3 | -1.1  | 3.45E-02 |  | v |
| n333421        | 0.3 | 1.0 | 0.0 | -10.3  | 3.96E-02 | 0.2 | -1.8  | 2.41E-01 |  |   |
| n379235        | 0.6 | 1.0 | 0.0 | -15.4  | 2.14E-02 | 0.3 | -2.2  | 3.30E-01 |  |   |
| n407725        | 0.8 | 1.0 | 0.0 | -24.1  | 3.28E-02 | 0.4 | -1.7  | 1.32E-01 |  |   |
| n378139        | 0.4 | 1.0 | 0.0 | -699.7 | 1.30E-02 | 0.6 | 1.6   | 3.66E-02 |  |   |

Table S15. Mean normalized read counts, fold change (compared to NF hearts mean value) and P values of lncRNAs that are differentially expressed in NICM LV samples

| Transcript     | NF mean (RPKM+0.1) | Fold Change (vs NF) | NICM pre-LVAD mean (RPKM+0.1) | Fold Change (vs NF) | P value (NF vs NICM) | NICM post-LVAD mean (RPKM+0.1) | Fold Change (vs NF) | P value (NICM pre vs post LVAD) | Normalized by LVAD | Improved by LVAD |
|----------------|--------------------|---------------------|-------------------------------|---------------------|----------------------|--------------------------------|---------------------|---------------------------------|--------------------|------------------|
| n333421        | 0.3                | 1.0                 | 0.0                           | N/A                 | 2.13E-02             | 0.5                            | 1.3                 | 3.14E-02                        |                    |                  |
| n333955        | 0.3                | 1.0                 | 17.8                          | 56.3                | 3.51E-02             | 2.7                            | 8.7                 | 9.41E-02                        |                    |                  |
| n377672        | 0.1                | 1.0                 | 1.6                           | 29.2                | 3.14E-02             | 1.2                            | 21.6                | 6.83E-01                        |                    |                  |
| n387023        | 0.0                | 1.0                 | 0.5                           | 19.8                | 2.06E-02             | 0.3                            | 11.6                | 3.64E-01                        |                    |                  |
| n333220        | 0.0                | 1.0                 | 0.2                           | 11.4                | 7.91E-03             | 0.3                            | 20.4                | 5.49E-01                        |                    |                  |
| TCONS_00011638 | 0.0                | 1.0                 | 0.4                           | 9.4                 | 3.16E-03             | 0.8                            | 18.4                | 2.56E-01                        |                    |                  |
| TCONS_00017455 | 0.1                | 1.0                 | 0.6                           | 8.5                 | 3.47E-02             | 0.1                            | 2.1                 | 5.85E-02                        |                    |                  |
| n387019        | 0.1                | 1.0                 | 0.5                           | 7.0                 | 3.15E-02             | 0.4                            | 5.1                 | 5.44E-01                        |                    |                  |
| n411026        | 0.0                | 1.0                 | 0.3                           | 6.3                 | 1.60E-02             | 0.2                            | 4.1                 | 3.18E-01                        |                    |                  |
| KCONS_00006233 | 0.3                | 1.0                 | 1.5                           | 5.7                 | 1.26E-03             | 0.7                            | 2.7                 | 1.10E-02                        |                    | √                |
| n334838        | 0.1                | 1.0                 | 0.6                           | 5.0                 | 1.73E-02             | 0.3                            | 2.7                 | 1.89E-01                        |                    |                  |
| n332777        | 0.2                | 1.0                 | 0.8                           | 4.8                 | 1.01E-02             | 0.4                            | 2.1                 | 1.05E-01                        |                    |                  |
| TCONS_00010815 | 0.2                | 1.0                 | 0.7                           | 4.1                 | 1.28E-02             | 0.5                            | 3.1                 | 5.51E-01                        |                    |                  |
| TCONS_00006930 | 1.8                | 1.0                 | 7.0                           | 3.8                 | 3.54E-03             | 7.5                            | 4.1                 | 8.27E-01                        |                    |                  |
| n333836        | 0.4                | 1.0                 | 1.4                           | 3.7                 | 1.97E-03             | 0.9                            | 2.4                 | 1.28E-01                        |                    |                  |
| KCONS_00000469 | 0.3                | 1.0                 | 1.1                           | 3.5                 | 3.55E-03             | 0.6                            | 2.0                 | 8.27E-03                        |                    | √                |
| n342815        | 0.2                | 1.0                 | 0.6                           | 3.4                 | 4.07E-02             | 0.6                            | 3.5                 | 8.86E-01                        |                    |                  |
| n337744        | 1.3                | 1.0                 | 4.2                           | 3.2                 | 2.89E-02             | 2.2                            | 1.7                 | 5.58E-02                        |                    |                  |
| n405633        | 0.1                | 1.0                 | 0.4                           | 3.2                 | 3.69E-02             | 0.5                            | 4.5                 | 6.71E-01                        |                    |                  |
| n346428        | 0.2                | 1.0                 | 0.6                           | 3.1                 | 3.40E-02             | 0.4                            | 1.9                 | 1.60E-01                        |                    |                  |
| n407157        | 0.3                | 1.0                 | 0.9                           | 3.0                 | 2.65E-03             | 1.0                            | 3.3                 | 7.17E-01                        |                    |                  |
| n382899        | 0.4                | 1.0                 | 1.3                           | 3.0                 | 3.46E-02             | 1.7                            | 4.0                 | 3.14E-01                        |                    |                  |
| n406989        | 1.7                | 1.0                 | 5.2                           | 3.0                 | 1.58E-04             | 3.6                            | 2.1                 | 7.37E-02                        |                    |                  |
| n338950        | 0.6                | 1.0                 | 1.6                           | 2.9                 | 6.94E-04             | 0.9                            | 1.7                 | 1.78E-02                        |                    | √                |
| n337060        | 5.9                | 1.0                 | 16.5                          | 2.8                 | 2.13E-03             | 9.6                            | 1.6                 | 7.17E-02                        |                    |                  |
| n335562        | 5.2                | 1.0                 | 14.4                          | 2.8                 | 3.58E-02             | 15.5                           | 3.0                 | 8.12E-01                        |                    |                  |
| TCONS_00019696 | 0.2                | 1.0                 | 0.5                           | 2.8                 | 8.65E-03             | 0.7                            | 3.8                 | 2.70E-01                        |                    |                  |
| n382098        | 0.4                | 1.0                 | 1.0                           | 2.7                 | 1.18E-02             | 0.6                            | 1.5                 | 5.87E-03                        |                    | √                |
| n341884        | 0.4                | 1.0                 | 1.2                           | 2.7                 | 1.27E-05             | 0.9                            | 2.0                 | 2.38E-02                        |                    | √                |
| TCONS_00001037 | 0.5                | 1.0                 | 1.4                           | 2.7                 | 6.17E-04             | 0.9                            | 1.7                 | 5.13E-02                        |                    |                  |
| n335544        | 0.3                | 1.0                 | 0.7                           | 2.7                 | 4.90E-02             | 0.7                            | 2.7                 | 9.83E-01                        |                    |                  |
| TCONS_00001588 | 0.3                | 1.0                 | 0.9                           | 2.6                 | 1.94E-02             | 0.7                            | 2.2                 | 5.00E-01                        |                    |                  |
| TCONS_00020932 | 0.2                | 1.0                 | 0.6                           | 2.6                 | 3.92E-02             | 0.4                            | 1.9                 | 1.73E-01                        |                    |                  |
| n341422        | 0.4                | 1.0                 | 1.2                           | 2.6                 | 2.09E-02             | 1.0                            | 2.3                 | 5.84E-01                        |                    |                  |
| n406496        | 0.3                | 1.0                 | 0.9                           | 2.6                 | 8.83E-03             | 2.1                            | 6.2                 | 2.11E-02                        |                    |                  |
| n410877        | 21.5               | 1.0                 | 55.3                          | 2.6                 | 5.62E-04             | 59.7                           | 2.8                 | 5.53E-01                        |                    |                  |
| n341691        | 0.4                | 1.0                 | 1.1                           | 2.5                 | 3.91E-07             | 1.0                            | 2.5                 | 8.10E-01                        |                    |                  |
| n342053        | 0.2                | 1.0                 | 0.6                           | 2.5                 | 2.92E-02             | 0.3                            | 1.2                 | 7.83E-02                        |                    |                  |
| n337076        | 0.4                | 1.0                 | 0.9                           | 2.5                 | 8.98E-03             | 0.7                            | 2.0                 | 5.14E-01                        |                    |                  |
| n406465        | 0.4                | 1.0                 | 1.1                           | 2.5                 | 2.78E-02             | 0.5                            | 1.1                 | 9.01E-02                        |                    |                  |
| n340521        | 0.3                | 1.0                 | 0.7                           | 2.5                 | 1.15E-04             | 0.7                            | 2.4                 | 7.54E-01                        |                    |                  |
| TCONS_00002713 | 0.7                | 1.0                 | 1.6                           | 2.4                 | 5.26E-04             | 1.6                            | 2.3                 | 7.79E-01                        |                    |                  |
| n378896        | 0.3                | 1.0                 | 0.7                           | 2.4                 | 5.72E-03             | 0.7                            | 2.6                 | 4.43E-01                        |                    |                  |
| TCONS_00029729 | 0.4                | 1.0                 | 1.0                           | 2.3                 | 3.47E-03             | 0.9                            | 2.2                 | 6.92E-01                        |                    |                  |
| n341327        | 0.3                | 1.0                 | 0.7                           | 2.3                 | 6.36E-03             | 0.5                            | 1.8                 | 5.92E-02                        |                    |                  |
| n410736        | 0.8                | 1.0                 | 1.8                           | 2.3                 | 3.24E-04             | 1.4                            | 1.8                 | 2.14E-01                        |                    |                  |
| n338024        | 0.4                | 1.0                 | 1.0                           | 2.3                 | 1.74E-02             | 1.0                            | 2.2                 | 8.59E-01                        |                    |                  |
| n340790        | 0.3                | 1.0                 | 0.8                           | 2.3                 | 1.15E-02             | 0.7                            | 2.0                 | 5.42E-01                        |                    |                  |
| TCONS_00025273 | 0.3                | 1.0                 | 0.7                           | 2.3                 | 2.78E-02             | 0.5                            | 1.7                 | 3.17E-01                        |                    |                  |
| n339755        | 0.2                | 1.0                 | 0.5                           | 2.3                 | 7.20E-03             | 0.4                            | 1.6                 | 2.03E-01                        |                    |                  |
| n342745        | 0.4                | 1.0                 | 0.9                           | 2.3                 | 5.04E-03             | 0.6                            | 1.7                 | 1.16E-02                        |                    | √                |
| n338653        | 0.3                | 1.0                 | 0.7                           | 2.3                 | 6.88E-04             | 0.6                            | 2.1                 | 6.57E-01                        |                    |                  |
| n410853        | 0.8                | 1.0                 | 1.7                           | 2.3                 | 2.77E-03             | 1.5                            | 2.0                 | 5.91E-01                        |                    |                  |
| n380504        | 1.1                | 1.0                 | 2.4                           | 2.2                 | 3.30E-03             | 1.6                            | 1.5                 | 1.55E-01                        |                    |                  |
| n338591        | 0.6                | 1.0                 | 1.4                           | 2.2                 | 6.78E-06             | 0.7                            | 1.2                 | 6.00E-04                        |                    | √                |
| n341527        | 0.3                | 1.0                 | 0.5                           | 2.2                 | 3.61E-02             | 0.3                            | 1.3                 | 3.19E-03                        |                    | √                |
| n338663        | 0.6                | 1.0                 | 1.2                           | 2.2                 | 7.82E-03             | 1.0                            | 1.7                 | 2.03E-01                        |                    |                  |
| TCONS_00000589 | 0.2                | 1.0                 | 0.4                           | 2.2                 | 4.55E-02             | 0.3                            | 1.5                 | 4.15E-01                        |                    |                  |
| n406636        | 0.7                | 1.0                 | 1.5                           | 2.1                 | 1.17E-04             | 1.2                            | 1.7                 | 5.96E-02                        |                    |                  |
| TCONS_00017676 | 0.3                | 1.0                 | 0.7                           | 2.1                 | 1.11E-03             | 0.5                            | 1.4                 | 8.73E-03                        |                    | √                |
| TCONS_00018253 | 0.4                | 1.0                 | 0.8                           | 2.1                 | 2.51E-02             | 0.7                            | 1.9                 | 7.63E-01                        |                    |                  |
| TCONS_00025886 | 0.4                | 1.0                 | 0.8                           | 2.1                 | 3.23E-02             | 0.7                            | 1.8                 | 6.18E-01                        |                    |                  |
| n339430        | 0.6                | 1.0                 | 1.2                           | 2.1                 | 1.06E-03             | 1.6                            | 2.7                 | 5.04E-01                        |                    |                  |
| n379210        | 0.4                | 1.0                 | 0.8                           | 2.1                 | 1.93E-02             | 0.7                            | 1.9                 | 6.81E-01                        |                    |                  |
| n339510        | 0.3                | 1.0                 | 0.6                           | 2.1                 | 3.84E-03             | 0.4                            | 1.4                 | 1.31E-01                        |                    |                  |
| n342014        | 0.6                | 1.0                 | 1.3                           | 2.1                 | 2.65E-02             | 2.4                            | 3.7                 | 1.47E-01                        |                    |                  |
| n337821        | 0.6                | 1.0                 | 1.3                           | 2.1                 | 1.75E-02             | 1.3                            | 2.0                 | 9.19E-01                        |                    |                  |
| n407534        | 1.8                | 1.0                 | 3.7                           | 2.1                 | 3.08E-02             | 2.3                            | 1.3                 | 1.27E-01                        |                    |                  |
| n342708        | 0.4                | 1.0                 | 0.9                           | 2.1                 | 1.55E-02             | 0.5                            | 1.2                 | 3.61E-02                        |                    | √                |
| n334841        | 2.0                | 1.0                 | 4.1                           | 2.1                 | 4.66E-03             | 3.3                            | 1.7                 | 2.12E-01                        |                    |                  |
| TCONS_00019783 | 0.3                | 1.0                 | 0.7                           | 2.1                 | 2.96E-02             | 0.7                            | 2.2                 | 7.82E-01                        |                    |                  |
| n387441        | 0.4                | 1.0                 | 0.9                           | 2.0                 | 2.53E-02             | 0.9                            | 2.2                 | 6.62E-01                        |                    |                  |
| n410010        | 0.8                | 1.0                 | 1.6                           | 2.0                 | 1.75E-06             | 2.1                            | 2.7                 | 2.11E-01                        |                    |                  |
| n341790        | 0.9                | 1.0                 | 1.8                           | 2.0                 | 6.32E-03             | 2.2                            | 2.5                 | 4.01E-01                        |                    |                  |
| n410935        | 0.6                | 1.0                 | 1.3                           | 2.0                 | 3.16E-02             | 0.9                            | 1.4                 | 1.75E-01                        |                    |                  |
| n333489        | 1.3                | 1.0                 | 2.6                           | 2.0                 | 2.00E-03             | 2.5                            | 1.9                 | 7.00E-01                        |                    |                  |
| n381928        | 0.3                | 1.0                 | 0.6                           | 2.0                 | 4.75E-02             | 0.7                            | 2.5                 | 5.83E-01                        |                    |                  |
| n334653        | 3.3                | 1.0                 | 6.6                           | 2.0                 | 1.95E-03             | 9.9                            | 3.0                 | 2.35E-01                        |                    |                  |
| n406227        | 1.9                | 1.0                 | 3.8                           | 2.0                 | 3.46E-03             | 2.1                            | 1.1                 | 1.40E-02                        |                    | √                |

|                |       |     |       |     |          |       |      |          |   |   |
|----------------|-------|-----|-------|-----|----------|-------|------|----------|---|---|
| n332603        | 389.2 | 1.0 | 769.4 | 2.0 | 6.13E-03 | 568.5 | 1.5  | 2.04E-01 |   |   |
| n340740        | 1.9   | 1.0 | 3.7   | 2.0 | 2.49E-02 | 1.8   | -1.1 | 1.99E-02 | √ | √ |
| n344513        | 0.5   | 1.0 | 0.9   | 2.0 | 2.35E-02 | 0.5   | 1.2  | 3.32E-02 |   | √ |
| n407227        | 7.9   | 1.0 | 15.6  | 2.0 | 6.91E-06 | 10.5  | 1.3  | 1.50E-03 |   | √ |
| n340649        | 2.0   | 1.0 | 3.8   | 2.0 | 3.24E-02 | 3.2   | 1.7  | 3.26E-01 |   |   |
| n344724        | 0.6   | 1.0 | 1.1   | 2.0 | 6.88E-03 | 1.1   | 2.0  | 9.31E-01 |   |   |
| n340512        | 0.6   | 1.0 | 1.1   | 1.9 | 5.19E-03 | 0.6   | 1.0  | 2.03E-02 | √ | √ |
| TCONS_00009832 | 0.4   | 1.0 | 0.7   | 1.9 | 3.36E-02 | 0.7   | 1.9  | 9.62E-01 |   |   |
| n406604        | 0.7   | 1.0 | 1.3   | 1.9 | 1.45E-02 | 0.9   | 1.3  | 1.29E-01 |   |   |
| n408308        | 3.5   | 1.0 | 6.7   | 1.9 | 3.15E-03 | 7.9   | 2.2  | 9.52E-02 |   |   |
| n381788        | 0.9   | 1.0 | 1.7   | 1.9 | 7.66E-03 | 1.7   | 1.8  | 7.34E-01 |   |   |
| n407949        | 2.0   | 1.0 | 3.7   | 1.9 | 1.00E-03 | 2.7   | 1.4  | 1.17E-01 |   |   |
| n382693        | 0.4   | 1.0 | 0.8   | 1.9 | 1.89E-02 | 1.1   | 2.6  | 6.19E-02 |   |   |
| n337754        | 0.7   | 1.0 | 1.2   | 1.9 | 3.36E-03 | 1.1   | 1.8  | 8.13E-01 |   |   |
| n342623        | 1.2   | 1.0 | 2.2   | 1.8 | 5.68E-04 | 2.4   | 2.1  | 2.13E-01 |   |   |
| n339627        | 0.4   | 1.0 | 0.7   | 1.8 | 1.16E-03 | 0.7   | 1.9  | 7.01E-01 |   |   |
| n344612        | 0.2   | 1.0 | 0.3   | 1.8 | 3.47E-02 | 0.4   | 2.1  | 7.20E-01 |   |   |
| n334548        | 0.5   | 1.0 | 0.9   | 1.8 | 4.34E-02 | 0.7   | 1.4  | 3.31E-01 |   |   |
| n408083        | 2.0   | 1.0 | 3.6   | 1.8 | 4.25E-02 | 1.9   | -1.0 | 1.32E-01 |   |   |
| KCONS_00003555 | 0.7   | 1.0 | 1.3   | 1.8 | 1.65E-03 | 1.3   | 1.8  | 9.90E-01 |   |   |
| n408341        | 0.3   | 1.0 | 0.6   | 1.8 | 1.95E-02 | 0.6   | 1.9  | 7.12E-01 |   |   |
| n342847        | 8.7   | 1.0 | 15.8  | 1.8 | 7.25E-04 | 19.8  | 2.3  | 6.56E-03 |   |   |
| n338387        | 1.6   | 1.0 | 2.9   | 1.8 | 1.79E-03 | 2.5   | 1.6  | 9.14E-02 |   |   |
| n334798        | 0.4   | 1.0 | 0.8   | 1.8 | 1.92E-02 | 0.6   | 1.4  | 1.15E-01 |   |   |
| n341189        | 2.1   | 1.0 | 3.8   | 1.8 | 1.17E-02 | 2.3   | 1.1  | 1.97E-02 | √ | √ |
| n335737        | 74.9  | 1.0 | 135.1 | 1.8 | 1.96E-02 | 125.7 | 1.7  | 7.94E-01 |   |   |
| n409064        | 1.6   | 1.0 | 2.9   | 1.8 | 1.18E-03 | 2.4   | 1.5  | 1.80E-01 |   |   |
| n338414        | 0.3   | 1.0 | 0.6   | 1.8 | 3.71E-02 | 0.6   | 1.7  | 8.38E-01 |   |   |
| TCONS_00009272 | 0.9   | 1.0 | 1.6   | 1.8 | 5.79E-03 | 0.9   | -1.0 | 3.89E-04 | √ | √ |
| TCONS_00027439 | 0.7   | 1.0 | 1.2   | 1.8 | 7.54E-03 | 1.3   | 1.9  | 6.74E-01 |   |   |
| n341541        | 0.6   | 1.0 | 1.1   | 1.8 | 5.62E-03 | 1.0   | 1.5  | 3.03E-01 |   |   |
| n340510        | 3.0   | 1.0 | 5.3   | 1.8 | 3.12E-04 | 3.3   | 1.1  | 2.07E-02 |   | √ |
| n339725        | 1.2   | 1.0 | 2.2   | 1.8 | 3.03E-02 | 2.4   | 1.9  | 7.48E-01 |   |   |
| n405263        | 12.8  | 1.0 | 22.7  | 1.8 | 4.10E-02 | 16.8  | 1.3  | 2.66E-01 |   |   |
| n340062        | 2.0   | 1.0 | 3.6   | 1.8 | 2.31E-02 | 2.1   | 1.0  | 4.67E-02 | √ | √ |
| n339682        | 1.9   | 1.0 | 3.3   | 1.8 | 1.23E-02 | 5.0   | 2.7  | 2.16E-01 |   |   |
| n410004        | 2.0   | 1.0 | 3.4   | 1.8 | 3.07E-05 | 3.0   | 1.5  | 2.04E-01 |   |   |
| n339643        | 1.6   | 1.0 | 2.7   | 1.8 | 2.27E-03 | 3.8   | 2.5  | 3.72E-02 |   |   |
| n335816        | 1.3   | 1.0 | 2.2   | 1.8 | 1.91E-02 | 2.4   | 1.9  | 7.71E-01 |   |   |
| n409073        | 0.7   | 1.0 | 1.2   | 1.8 | 7.79E-04 | 1.0   | 1.5  | 2.66E-01 |   |   |
| n409227        | 1.2   | 1.0 | 2.1   | 1.8 | 1.29E-03 | 1.5   | 1.3  | 2.83E-02 |   | √ |
| n409183        | 0.4   | 1.0 | 0.7   | 1.8 | 1.34E-03 | 0.6   | 1.5  | 5.73E-01 |   |   |
| n411621        | 0.3   | 1.0 | 0.5   | 1.8 | 3.39E-03 | 0.4   | 1.6  | 2.35E-01 |   |   |
| n337799        | 3.3   | 1.0 | 5.8   | 1.7 | 5.83E-05 | 5.9   | 1.8  | 9.17E-01 |   |   |
| n341425        | 0.6   | 1.0 | 1.1   | 1.7 | 1.10E-02 | 0.6   | -1.0 | 3.70E-02 | √ | √ |
| n339385        | 0.4   | 1.0 | 0.7   | 1.7 | 1.84E-02 | 1.0   | 2.6  | 1.46E-01 |   |   |
| n405970        | 1.3   | 1.0 | 2.2   | 1.7 | 6.03E-03 | 2.8   | 2.2  | 3.68E-02 |   |   |
| n340990        | 0.4   | 1.0 | 0.7   | 1.7 | 4.26E-02 | 0.7   | 1.6  | 7.06E-01 |   |   |
| n409622        | 0.4   | 1.0 | 0.7   | 1.7 | 3.86E-02 | 0.4   | 1.0  | 1.42E-01 |   |   |
| n406404        | 0.5   | 1.0 | 0.9   | 1.7 | 2.02E-03 | 0.7   | 1.3  | 8.13E-02 |   |   |
| TCONS_00005634 | 5.3   | 1.0 | 9.2   | 1.7 | 4.53E-02 | 4.4   | -1.2 | 2.93E-02 |   |   |
| n383738        | 0.4   | 1.0 | 0.7   | 1.7 | 3.11E-02 | 0.6   | 1.5  | 1.65E-01 |   |   |
| n407060        | 4.0   | 1.0 | 6.8   | 1.7 | 1.70E-04 | 6.6   | 1.7  | 8.69E-01 |   |   |
| n326378        | 0.9   | 1.0 | 1.5   | 1.7 | 3.10E-02 | 1.7   | 1.9  | 7.04E-01 |   |   |
| n378771        | 0.5   | 1.0 | 0.8   | 1.7 | 4.33E-02 | 0.6   | 1.2  | 2.22E-01 |   |   |
| n336259        | 0.5   | 1.0 | 0.9   | 1.7 | 4.03E-02 | 0.8   | 1.6  | 7.10E-01 |   |   |
| n341081        | 0.4   | 1.0 | 0.8   | 1.7 | 8.50E-03 | 0.7   | 1.5  | 5.11E-01 |   |   |
| n381542        | 2.1   | 1.0 | 3.5   | 1.7 | 1.71E-02 | 3.0   | 1.4  | 4.31E-01 |   |   |
| n342118        | 0.5   | 1.0 | 0.9   | 1.7 | 5.11E-04 | 1.0   | 1.8  | 8.11E-01 |   |   |
| n340800        | 1.2   | 1.0 | 1.9   | 1.7 | 2.16E-02 | 2.2   | 1.9  | 7.45E-01 |   |   |
| n381584        | 0.4   | 1.0 | 0.7   | 1.7 | 2.51E-02 | 0.8   | 1.9  | 6.28E-01 |   |   |
| n333000        | 3.1   | 1.0 | 5.2   | 1.7 | 4.43E-03 | 4.2   | 1.3  | 3.44E-01 |   |   |
| n333054        | 3.2   | 1.0 | 5.4   | 1.7 | 2.90E-02 | 3.2   | -1.0 | 2.05E-03 | √ | √ |
| n341216        | 2.2   | 1.0 | 3.6   | 1.7 | 1.12E-02 | 4.4   | 2.1  | 1.89E-01 |   |   |
| n384573        | 0.7   | 1.0 | 1.2   | 1.7 | 4.47E-02 | 0.9   | 1.3  | 4.19E-01 |   |   |
| n338998        | 0.5   | 1.0 | 0.8   | 1.6 | 3.13E-03 | 0.8   | 1.7  | 7.24E-01 |   |   |
| n377799        | 1.0   | 1.0 | 1.6   | 1.6 | 3.07E-02 | 2.0   | 2.1  | 4.01E-01 |   |   |
| n341167        | 7.3   | 1.0 | 12.0  | 1.6 | 5.13E-04 | 10.6  | 1.5  | 2.22E-01 |   |   |
| n381786        | 5.2   | 1.0 | 8.6   | 1.6 | 7.57E-04 | 8.2   | 1.6  | 6.31E-01 |   |   |
| n410723        | 2.4   | 1.0 | 4.0   | 1.6 | 8.59E-05 | 4.0   | 1.6  | 9.39E-01 |   |   |
| n378584        | 0.8   | 1.0 | 1.2   | 1.6 | 1.41E-02 | 1.2   | 1.7  | 9.83E-01 |   |   |
| n337851        | 0.8   | 1.0 | 1.4   | 1.6 | 4.56E-02 | 1.1   | 1.3  | 3.10E-01 |   |   |
| n340547        | 2.3   | 1.0 | 3.7   | 1.6 | 7.92E-03 | 4.6   | 2.0  | 4.48E-01 |   |   |
| n411679        | 1.2   | 1.0 | 2.0   | 1.6 | 2.80E-03 | 1.8   | 1.5  | 4.74E-01 |   |   |
| n340297        | 140.6 | 1.0 | 228.4 | 1.6 | 2.95E-03 | 161.4 | 1.1  | 4.31E-02 |   | √ |
| n377745        | 0.8   | 1.0 | 1.2   | 1.6 | 1.57E-02 | 0.9   | 1.2  | 1.20E-01 |   |   |
| n386148        | 1.3   | 1.0 | 2.1   | 1.6 | 2.84E-03 | 1.8   | 1.4  | 1.77E-01 |   |   |
| n335610        | 0.8   | 1.0 | 1.2   | 1.6 | 5.62E-03 | 1.2   | 1.6  | 8.76E-01 |   |   |
| n339059        | 1.2   | 1.0 | 1.9   | 1.6 | 1.25E-02 | 1.6   | 1.4  | 4.57E-01 |   |   |
| n344486        | 0.4   | 1.0 | 0.7   | 1.6 | 4.15E-02 | 0.5   | 1.3  | 3.73E-01 |   |   |
| n379110        | 0.5   | 1.0 | 0.8   | 1.6 | 6.56E-03 | 0.6   | 1.2  | 1.09E-03 |   | √ |
| n385202        | 0.8   | 1.0 | 1.3   | 1.6 | 4.52E-03 | 1.4   | 1.7  | 7.53E-01 |   |   |
| n385207        | 0.7   | 1.0 | 1.2   | 1.6 | 3.13E-02 | 1.1   | 1.5  | 6.71E-01 |   |   |

|                |      |     |      |     |          |      |      |          |   |   |
|----------------|------|-----|------|-----|----------|------|------|----------|---|---|
| n340248        | 1.8  | 1.0 | 2.9  | 1.6 | 3.63E-03 | 3.2  | 1.7  | 6.84E-01 |   |   |
| n407776        | 3.7  | 1.0 | 5.9  | 1.6 | 8.36E-04 | 5.7  | 1.5  | 7.75E-01 |   |   |
| n410093        | 3.6  | 1.0 | 5.7  | 1.6 | 3.07E-02 | 6.4  | 1.8  | 1.80E-01 |   |   |
| TCONS_00025708 | 3.1  | 1.0 | 4.9  | 1.6 | 1.36E-03 | 4.8  | 1.6  | 7.56E-01 |   |   |
| n335242        | 2.2  | 1.0 | 3.6  | 1.6 | 5.36E-03 | 3.5  | 1.5  | 6.65E-01 |   |   |
| n340496        | 0.6  | 1.0 | 0.9  | 1.6 | 4.48E-02 | 0.9  | 1.6  | 9.40E-01 |   |   |
| n380284        | 0.9  | 1.0 | 1.4  | 1.6 | 4.83E-02 | 1.4  | 1.6  | 9.86E-01 |   |   |
| n384394        | 0.8  | 1.0 | 1.3  | 1.6 | 2.25E-02 | 0.7  | -1.1 | 3.25E-02 | √ | √ |
| n333520        | 1.1  | 1.0 | 1.8  | 1.6 | 8.87E-03 | 2.5  | 2.2  | 1.97E-01 |   |   |
| n385212        | 3.5  | 1.0 | 5.5  | 1.6 | 5.17E-03 | 6.9  | 2.0  | 6.18E-02 |   |   |
| n337722        | 0.4  | 1.0 | 0.6  | 1.6 | 2.66E-02 | 0.8  | 2.0  | 3.94E-01 |   |   |
| n341120        | 0.6  | 1.0 | 0.9  | 1.6 | 2.83E-02 | 0.7  | 1.2  | 2.51E-01 |   |   |
| n386047        | 1.0  | 1.0 | 1.5  | 1.6 | 1.56E-02 | 1.2  | 1.3  | 9.93E-02 |   |   |
| n339736        | 1.1  | 1.0 | 1.7  | 1.6 | 1.62E-03 | 1.6  | 1.5  | 2.76E-01 |   |   |
| n342574        | 1.4  | 1.0 | 2.2  | 1.6 | 9.75E-03 | 2.0  | 1.5  | 6.62E-01 |   |   |
| n405689        | 0.6  | 1.0 | 0.9  | 1.6 | 4.39E-03 | 0.8  | 1.5  | 7.83E-01 |   |   |
| n334788        | 2.5  | 1.0 | 3.9  | 1.6 | 4.68E-02 | 4.8  | 1.9  | 3.94E-01 |   |   |
| n344464        | 2.5  | 1.0 | 3.9  | 1.6 | 8.60E-04 | 3.5  | 1.4  | 1.52E-01 |   |   |
| n338221        | 1.0  | 1.0 | 1.6  | 1.6 | 1.96E-02 | 1.6  | 1.6  | 9.59E-01 |   |   |
| n410131        | 0.7  | 1.0 | 1.0  | 1.6 | 2.43E-02 | 1.0  | 1.6  | 9.91E-01 |   |   |
| n340953        | 3.5  | 1.0 | 5.5  | 1.6 | 1.23E-02 | 9.3  | 2.7  | 1.90E-01 |   |   |
| n386063        | 2.2  | 1.0 | 3.5  | 1.6 | 7.04E-05 | 2.3  | 1.0  | 4.03E-03 | √ | √ |
| n407998        | 0.8  | 1.0 | 1.3  | 1.6 | 1.41E-02 | 1.2  | 1.4  | 4.45E-01 |   |   |
| n340820        | 0.3  | 1.0 | 0.4  | 1.5 | 2.21E-02 | 0.8  | 3.1  | 6.30E-02 |   |   |
| n333419        | 1.7  | 1.0 | 2.6  | 1.5 | 3.74E-02 | 2.8  | 1.7  | 5.86E-01 |   |   |
| n339434        | 2.4  | 1.0 | 3.7  | 1.5 | 3.66E-02 | 4.2  | 1.8  | 2.22E-01 |   |   |
| n341828        | 1.8  | 1.0 | 2.8  | 1.5 | 1.16E-03 | 3.5  | 1.9  | 1.05E-01 |   |   |
| n408884        | 3.3  | 1.0 | 5.1  | 1.5 | 3.57E-02 | 4.0  | 1.2  | 2.09E-01 |   |   |
| n406809        | 0.6  | 1.0 | 1.0  | 1.5 | 8.28E-03 | 0.8  | 1.3  | 1.77E-01 |   |   |
| n407837        | 5.6  | 1.0 | 8.6  | 1.5 | 6.34E-05 | 9.1  | 1.6  | 3.77E-01 |   |   |
| n386266        | 0.9  | 1.0 | 1.4  | 1.5 | 1.24E-02 | 1.4  | 1.5  | 9.83E-01 |   |   |
| n385571        | 2.2  | 1.0 | 3.3  | 1.5 | 3.82E-02 | 2.9  | 1.3  | 2.90E-01 |   |   |
| n335699        | 2.2  | 1.0 | 3.4  | 1.5 | 6.31E-03 | 3.5  | 1.6  | 7.80E-01 |   |   |
| n335708        | 7.1  | 1.0 | 10.7 | 1.5 | 1.49E-02 | 13.2 | 1.9  | 5.35E-01 |   |   |
| n409697        | 4.9  | 1.0 | 7.4  | 1.5 | 5.99E-06 | 6.6  | 1.4  | 1.38E-01 |   |   |
| n384770        | 2.1  | 1.0 | 3.1  | 1.5 | 1.73E-03 | 3.3  | 1.6  | 5.79E-01 |   |   |
| n411677        | 0.7  | 1.0 | 1.1  | 1.5 | 2.79E-02 | 0.8  | 1.1  | 2.95E-02 | √ | √ |
| n385278        | 24.7 | 1.0 | 37.5 | 1.5 | 1.76E-05 | 35.0 | 1.4  | 2.57E-01 |   |   |
| n340559        | 0.8  | 1.0 | 1.2  | 1.5 | 3.30E-02 | 0.9  | 1.2  | 7.70E-02 |   |   |
| n387393        | 1.1  | 1.0 | 1.7  | 1.5 | 2.62E-02 | 1.5  | 1.4  | 7.04E-01 |   |   |
| n341749        | 1.6  | 1.0 | 2.4  | 1.5 | 6.72E-03 | 1.9  | 1.2  | 1.75E-02 |   |   |
| n411755        | 3.1  | 1.0 | 4.7  | 1.5 | 3.68E-02 | 7.1  | 2.3  | 1.05E-01 |   |   |
| n341697        | 0.7  | 1.0 | 1.1  | 1.5 | 7.12E-03 | 0.8  | 1.1  | 3.03E-02 | √ | √ |
| KCONS_00028690 | 0.8  | 1.0 | 1.3  | 1.5 | 2.66E-02 | 1.0  | 1.2  | 1.78E-01 |   |   |
| n342855        | 19.0 | 1.0 | 28.5 | 1.5 | 5.07E-04 | 38.4 | 2.0  | 9.24E-02 |   |   |
| n377756        | 1.3  | 1.0 | 2.0  | 1.5 | 1.18E-03 | 1.8  | 1.3  | 3.33E-01 |   |   |
| TCONS_00025781 | 1.3  | 1.0 | 2.0  | 1.5 | 9.92E-03 | 1.5  | 1.1  | 2.83E-02 |   |   |
| n340203        | 1.3  | 1.0 | 2.0  | 1.5 | 2.04E-02 | 2.3  | 1.8  | 6.84E-01 |   |   |
| n379481        | 1.3  | 1.0 | 2.0  | 1.5 | 2.04E-02 | 2.3  | 1.8  | 6.84E-01 |   |   |
| n332941        | 5.3  | 1.0 | 8.0  | 1.5 | 1.32E-02 | 8.8  | 1.6  | 2.66E-01 |   |   |
| n407822        | 1.3  | 1.0 | 1.9  | 1.5 | 6.57E-04 | 1.5  | 1.2  | 4.14E-02 |   |   |
| n407746        | 1.3  | 1.0 | 2.0  | 1.5 | 2.88E-02 | 2.1  | 1.6  | 3.43E-01 |   |   |
| n335645        | 3.2  | 1.0 | 4.8  | 1.5 | 4.04E-02 | 4.3  | 1.4  | 6.11E-01 |   |   |
| n336952        | 0.8  | 1.0 | 1.1  | 1.5 | 1.57E-02 | 0.7  | -1.0 | 3.27E-02 | √ | √ |
| n342850        | 1.0  | 1.0 | 1.5  | 1.5 | 1.80E-02 | 1.9  | 1.8  | 3.57E-01 |   |   |
| n338468        | 0.8  | 1.0 | 1.1  | 1.5 | 4.09E-02 | 1.0  | 1.3  | 4.61E-01 |   |   |
| n386637        | 1.1  | 1.0 | 1.7  | 1.5 | 3.49E-02 | 1.9  | 1.7  | 5.19E-01 |   |   |
| n408096        | 1.7  | 1.0 | 2.6  | 1.5 | 4.93E-02 | 2.8  | 1.6  | 5.76E-01 |   |   |
| n408051        | 12.2 | 1.0 | 18.0 | 1.5 | 2.96E-02 | 22.9 | 1.9  | 2.90E-01 |   |   |
| n325601        | 0.4  | 1.0 | 0.6  | 1.5 | 2.85E-02 | 0.9  | 2.0  | 3.76E-01 |   |   |
| n340240        | 9.1  | 1.0 | 13.4 | 1.5 | 4.32E-03 | 11.1 | 1.2  | 1.62E-01 |   |   |
| n335517        | 0.6  | 1.0 | 0.9  | 1.5 | 4.57E-02 | 1.1  | 1.7  | 2.84E-01 |   |   |
| TCONS_00023184 | 1.3  | 1.0 | 1.8  | 1.5 | 6.41E-03 | 1.6  | 1.3  | 4.08E-01 |   |   |
| n338223        | 1.8  | 1.0 | 2.7  | 1.5 | 1.18E-03 | 3.5  | 1.9  | 1.14E-01 |   |   |
| n339699        | 1.4  | 1.0 | 2.1  | 1.5 | 1.25E-02 | 2.0  | 1.4  | 5.60E-01 |   |   |
| n342861        | 1.8  | 1.0 | 2.6  | 1.5 | 2.69E-02 | 2.4  | 1.3  | 4.32E-01 |   |   |
| TCONS_00008328 | 1.3  | 1.0 | 2.0  | 1.5 | 1.85E-02 | 1.4  | 1.0  | 2.51E-02 | √ | √ |
| n335648        | 28.3 | 1.0 | 41.4 | 1.5 | 8.93E-03 | 45.4 | 1.6  | 3.80E-01 |   |   |
| n341533        | 0.5  | 1.0 | 0.8  | 1.5 | 7.63E-03 | 0.9  | 1.7  | 1.01E-01 |   |   |
| n340705        | 0.6  | 1.0 | 0.9  | 1.5 | 1.32E-02 | 0.8  | 1.4  | 6.78E-01 |   |   |
| n342328        | 1.2  | 1.0 | 1.7  | 1.5 | 5.90E-04 | 1.6  | 1.3  | 3.64E-01 |   |   |
| n408198        | 3.3  | 1.0 | 4.8  | 1.5 | 2.12E-03 | 3.6  | 1.1  | 3.20E-02 | √ | √ |
| n341339        | 13.9 | 1.0 | 20.3 | 1.5 | 6.33E-03 | 22.7 | 1.6  | 3.47E-01 |   |   |
| n342817        | 4.1  | 1.0 | 5.9  | 1.5 | 9.48E-04 | 6.0  | 1.5  | 8.60E-01 |   |   |
| n339262        | 2.3  | 1.0 | 3.4  | 1.5 | 7.29E-04 | 4.8  | 2.0  | 3.12E-01 |   |   |
| n386569        | 2.5  | 1.0 | 3.7  | 1.5 | 6.24E-03 | 3.1  | 1.2  | 3.97E-01 |   |   |
| n333677        | 1.2  | 1.0 | 1.7  | 1.4 | 3.54E-02 | 1.4  | 1.2  | 3.08E-01 |   |   |
| n338394        | 2.1  | 1.0 | 3.0  | 1.4 | 5.17E-03 | 3.2  | 1.5  | 4.76E-01 |   |   |
| n335665        | 4.9  | 1.0 | 7.1  | 1.4 | 9.74E-03 | 7.5  | 1.5  | 7.82E-01 |   |   |
| n342167        | 0.5  | 1.0 | 0.8  | 1.4 | 1.99E-02 | 0.4  | -1.3 | 2.84E-02 |   |   |
| n407022        | 2.6  | 1.0 | 3.7  | 1.4 | 7.86E-03 | 2.8  | 1.1  | 1.66E-02 |   |   |
| n410153        | 0.8  | 1.0 | 1.1  | 1.4 | 4.10E-02 | 1.3  | 1.7  | 3.18E-01 |   |   |
| n410674        | 0.7  | 1.0 | 1.0  | 1.4 | 1.88E-02 | 1.0  | 1.4  | 9.34E-01 |   |   |
| n407212        | 0.6  | 1.0 | 0.8  | 1.4 | 3.84E-02 | 0.7  | 1.1  | 9.31E-02 |   |   |

|                |      |     |      |     |          |      |      |          |   |   |
|----------------|------|-----|------|-----|----------|------|------|----------|---|---|
| n408895        | 1.1  | 1.0 | 1.6  | 1.4 | 4.50E-03 | 1.1  | -1.0 | 1.13E-02 | ∇ | ∇ |
| n410692        | 2.6  | 1.0 | 3.7  | 1.4 | 3.34E-02 | 3.0  | 1.2  | 1.50E-01 |   |   |
| n333420        | 1.0  | 1.0 | 1.5  | 1.4 | 3.06E-02 | 1.3  | 1.2  | 3.04E-01 |   |   |
| n335563        | 0.7  | 1.0 | 1.0  | 1.4 | 4.16E-02 | 0.7  | 1.0  | 1.36E-01 |   |   |
| n340788        | 2.2  | 1.0 | 3.1  | 1.4 | 3.02E-02 | 2.9  | 1.4  | 6.72E-01 |   |   |
| n407400        | 1.3  | 1.0 | 1.8  | 1.4 | 4.16E-02 | 1.5  | 1.2  | 3.92E-01 |   |   |
| n383242        | 1.1  | 1.0 | 1.5  | 1.4 | 1.92E-02 | 1.5  | 1.4  | 7.96E-01 |   |   |
| TCONS_00025147 | 2.3  | 1.0 | 3.2  | 1.4 | 4.84E-03 | 2.9  | 1.3  | 4.74E-01 |   |   |
| n341045        | 2.1  | 1.0 | 3.0  | 1.4 | 1.02E-02 | 2.8  | 1.3  | 6.53E-01 |   |   |
| n337985        | 0.8  | 1.0 | 1.2  | 1.4 | 1.95E-02 | 1.5  | 1.8  | 6.03E-02 |   |   |
| n339841        | 3.3  | 1.0 | 4.7  | 1.4 | 9.63E-03 | 3.7  | 1.1  | 2.07E-01 |   |   |
| n337724        | 0.8  | 1.0 | 1.2  | 1.4 | 1.11E-02 | 1.1  | 1.4  | 6.55E-01 |   |   |
| n406646        | 3.9  | 1.0 | 5.5  | 1.4 | 7.79E-03 | 5.8  | 1.5  | 4.61E-01 |   |   |
| n411731        | 3.9  | 1.0 | 5.4  | 1.4 | 1.21E-02 | 4.5  | 1.2  | 2.88E-01 |   |   |
| n410210        | 2.5  | 1.0 | 3.5  | 1.4 | 2.64E-02 | 3.8  | 1.6  | 6.47E-01 |   |   |
| n384558        | 1.5  | 1.0 | 2.1  | 1.4 | 4.89E-02 | 3.1  | 2.1  | 1.83E-01 |   |   |
| n342021        | 1.0  | 1.0 | 1.4  | 1.4 | 1.21E-02 | 1.3  | 1.3  | 7.33E-01 |   |   |
| n382060        | 0.7  | 1.0 | 1.0  | 1.4 | 2.36E-02 | 0.9  | 1.2  | 3.51E-01 |   |   |
| n339188        | 0.8  | 1.0 | 1.1  | 1.4 | 2.10E-02 | 1.1  | 1.4  | 8.93E-01 |   |   |
| n410604        | 31.3 | 1.0 | 44.0 | 1.4 | 1.70E-06 | 46.3 | 1.5  | 5.24E-01 |   |   |
| n377986        | 1.0  | 1.0 | 1.4  | 1.4 | 3.30E-02 | 1.2  | 1.2  | 2.74E-01 |   |   |
| n345594        | 3.1  | 1.0 | 4.3  | 1.4 | 1.89E-04 | 5.8  | 1.9  | 1.59E-02 |   |   |
| n408079        | 2.6  | 1.0 | 3.7  | 1.4 | 9.89E-03 | 3.3  | 1.3  | 2.12E-01 |   |   |
| n409548        | 1.2  | 1.0 | 1.7  | 1.4 | 3.09E-02 | 1.6  | 1.3  | 7.57E-01 |   |   |
| n343053        | 1.9  | 1.0 | 2.6  | 1.4 | 3.50E-03 | 2.6  | 1.4  | 9.58E-01 |   |   |
| n407454        | 2.5  | 1.0 | 3.5  | 1.4 | 8.35E-04 | 2.7  | 1.1  | 2.82E-02 |   |   |
| n345418        | 0.8  | 1.0 | 1.1  | 1.4 | 4.43E-02 | 1.2  | 1.4  | 7.64E-01 |   |   |
| n342113        | 3.0  | 1.0 | 4.2  | 1.4 | 1.75E-02 | 3.7  | 1.2  | 3.94E-01 |   |   |
| n408905        | 2.5  | 1.0 | 3.5  | 1.4 | 4.15E-03 | 3.2  | 1.3  | 4.57E-01 |   |   |
| n379599        | 2.9  | 1.0 | 4.0  | 1.4 | 1.75E-02 | 3.7  | 1.3  | 3.95E-01 |   |   |
| n338422        | 2.6  | 1.0 | 3.6  | 1.4 | 3.61E-03 | 4.0  | 1.6  | 6.04E-01 |   |   |
| n338920        | 0.8  | 1.0 | 1.2  | 1.4 | 1.59E-03 | 1.1  | 1.3  | 4.49E-01 |   |   |
| n407180        | 1.3  | 1.0 | 1.8  | 1.4 | 4.49E-04 | 1.8  | 1.4  | 8.94E-01 |   |   |
| n409293        | 0.8  | 1.0 | 1.1  | 1.4 | 4.49E-02 | 1.8  | 2.3  | 3.65E-02 |   |   |
| n410486        | 0.5  | 1.0 | 0.7  | 1.4 | 3.44E-02 | 0.7  | 1.4  | 7.17E-01 |   |   |
| n339058        | 0.6  | 1.0 | 0.8  | 1.4 | 1.85E-02 | 0.8  | 1.3  | 7.65E-01 |   |   |
| n342577        | 3.8  | 1.0 | 5.2  | 1.4 | 4.07E-02 | 5.4  | 1.4  | 8.88E-01 |   |   |
| n410530        | 3.9  | 1.0 | 5.4  | 1.4 | 4.06E-02 | 6.0  | 1.5  | 5.75E-01 |   |   |
| n410453        | 2.0  | 1.0 | 2.7  | 1.4 | 1.84E-02 | 2.5  | 1.3  | 1.75E-01 |   |   |
| n338971        | 5.5  | 1.0 | 7.6  | 1.4 | 3.54E-04 | 6.9  | 1.3  | 3.22E-01 |   |   |
| n338008        | 0.8  | 1.0 | 1.0  | 1.4 | 2.03E-03 | 1.2  | 1.6  | 1.97E-01 |   |   |
| n342913        | 1.6  | 1.0 | 2.2  | 1.4 | 9.36E-03 | 2.3  | 1.4  | 6.97E-01 |   |   |
| n410691        | 5.1  | 1.0 | 6.9  | 1.4 | 3.72E-02 | 8.3  | 1.6  | 1.95E-01 |   |   |
| n386635        | 0.7  | 1.0 | 1.0  | 1.4 | 4.07E-02 | 1.3  | 1.7  | 8.62E-02 |   |   |
| n338484        | 3.4  | 1.0 | 4.6  | 1.4 | 2.16E-02 | 5.0  | 1.5  | 5.41E-01 |   |   |
| n335587        | 13.1 | 1.0 | 17.7 | 1.4 | 4.12E-02 | 12.6 | -1.0 | 1.01E-02 | ∇ | ∇ |
| n407156        | 30.3 | 1.0 | 41.1 | 1.4 | 9.98E-03 | 57.5 | 1.9  | 2.84E-02 |   |   |
| n339041        | 21.8 | 1.0 | 29.6 | 1.4 | 3.54E-02 | 29.3 | 1.3  | 9.09E-01 |   |   |
| n410733        | 1.2  | 1.0 | 1.6  | 1.4 | 9.87E-03 | 1.7  | 1.4  | 7.29E-01 |   |   |
| n384298        | 7.2  | 1.0 | 9.7  | 1.4 | 8.86E-04 | 12.4 | 1.7  | 2.22E-03 |   |   |
| n338578        | 1.1  | 1.0 | 1.5  | 1.4 | 2.64E-02 | 1.4  | 1.3  | 4.72E-01 |   |   |
| n407079        | 1.8  | 1.0 | 2.4  | 1.4 | 5.88E-05 | 2.2  | 1.2  | 2.06E-01 |   |   |
| n408354        | 3.1  | 1.0 | 4.2  | 1.4 | 2.44E-02 | 5.3  | 1.7  | 2.14E-01 |   |   |
| n409653        | 2.5  | 1.0 | 3.3  | 1.4 | 3.27E-02 | 2.1  | -1.2 | 4.63E-03 |   |   |
| n338902        | 1.8  | 1.0 | 2.4  | 1.4 | 4.68E-02 | 2.8  | 1.6  | 1.83E-01 |   |   |
| n383026        | 0.6  | 1.0 | 0.8  | 1.3 | 3.91E-02 | 0.9  | 1.6  | 4.44E-01 |   |   |
| n377797        | 0.8  | 1.0 | 1.1  | 1.3 | 2.84E-02 | 1.1  | 1.3  | 9.86E-01 |   |   |
| n338898        | 1.3  | 1.0 | 1.7  | 1.3 | 3.54E-02 | 1.4  | 1.1  | 4.10E-02 |   |   |
| n333474        | 8.6  | 1.0 | 11.6 | 1.3 | 8.85E-04 | 12.0 | 1.4  | 7.53E-01 |   |   |
| n385229        | 9.1  | 1.0 | 12.2 | 1.3 | 2.42E-02 | 12.7 | 1.4  | 6.33E-01 |   |   |
| TCONS_00025146 | 1.1  | 1.0 | 1.5  | 1.3 | 1.97E-02 | 1.5  | 1.4  | 9.20E-01 |   |   |
| n410790        | 0.7  | 1.0 | 0.9  | 1.3 | 2.55E-02 | 0.9  | 1.3  | 7.68E-01 |   |   |
| n410586        | 9.7  | 1.0 | 13.0 | 1.3 | 1.60E-04 | 13.2 | 1.4  | 8.26E-01 |   |   |
| n340631        | 3.1  | 1.0 | 4.2  | 1.3 | 2.47E-03 | 4.0  | 1.3  | 5.79E-01 |   |   |
| n345437        | 5.1  | 1.0 | 6.9  | 1.3 | 2.34E-02 | 8.0  | 1.5  | 2.78E-01 |   |   |
| n406590        | 9.4  | 1.0 | 12.6 | 1.3 | 1.69E-02 | 11.8 | 1.3  | 5.27E-01 |   |   |
| n340977        | 1.3  | 1.0 | 1.7  | 1.3 | 4.95E-02 | 1.6  | 1.2  | 6.17E-01 |   |   |
| n410133        | 2.0  | 1.0 | 2.7  | 1.3 | 4.27E-02 | 2.5  | 1.3  | 6.24E-01 |   |   |
| n406914        | 0.7  | 1.0 | 0.9  | 1.3 | 3.20E-03 | 0.9  | 1.3  | 5.55E-01 |   |   |
| n405864        | 1.7  | 1.0 | 2.3  | 1.3 | 9.39E-03 | 2.0  | 1.2  | 2.76E-01 |   |   |
| n385371        | 1.0  | 1.0 | 1.4  | 1.3 | 4.51E-02 | 1.2  | 1.2  | 2.47E-01 |   |   |
| n324698        | 1.1  | 1.0 | 1.5  | 1.3 | 4.93E-02 | 1.2  | 1.1  | 2.31E-01 |   |   |
| n339467        | 1.3  | 1.0 | 1.7  | 1.3 | 7.27E-03 | 1.6  | 1.2  | 4.81E-01 |   |   |
| n339557        | 5.9  | 1.0 | 7.8  | 1.3 | 1.88E-03 | 7.0  | 1.2  | 2.17E-01 |   |   |
| n340650        | 1.6  | 1.0 | 2.1  | 1.3 | 1.79E-02 | 2.6  | 1.7  | 9.36E-03 |   |   |
| n407183        | 6.7  | 1.0 | 8.9  | 1.3 | 1.78E-05 | 8.9  | 1.3  | 8.91E-01 |   |   |
| n408249        | 7.0  | 1.0 | 9.3  | 1.3 | 1.02E-02 | 8.0  | 1.1  | 1.36E-01 |   |   |
| n410744        | 3.5  | 1.0 | 4.7  | 1.3 | 7.00E-03 | 3.8  | 1.1  | 1.01E-01 |   |   |
| n410471        | 13.1 | 1.0 | 17.3 | 1.3 | 4.86E-02 | 17.5 | 1.3  | 9.57E-01 |   |   |
| n408077        | 2.4  | 1.0 | 3.2  | 1.3 | 1.89E-02 | 3.2  | 1.3  | 9.05E-01 |   |   |
| n407184        | 1.7  | 1.0 | 2.2  | 1.3 | 1.62E-02 | 2.1  | 1.2  | 4.49E-01 |   |   |
| n341057        | 1.9  | 1.0 | 2.5  | 1.3 | 2.44E-02 | 3.1  | 1.6  | 3.25E-01 |   |   |
| n339370        | 0.6  | 1.0 | 0.8  | 1.3 | 9.36E-03 | 0.6  | -1.0 | 3.63E-02 | ∇ | ∇ |
| n337637        | 2.3  | 1.0 | 3.0  | 1.3 | 2.45E-02 | 3.7  | 1.6  | 3.28E-01 |   |   |

|                |      |     |      |     |          |      |      |          |   |   |
|----------------|------|-----|------|-----|----------|------|------|----------|---|---|
| n341486        | 2.7  | 1.0 | 3.6  | 1.3 | 2.68E-02 | 3.7  | 1.4  | 8.52E-01 |   |   |
| n377720        | 1.3  | 1.0 | 1.7  | 1.3 | 2.51E-02 | 1.7  | 1.3  | 8.94E-01 |   |   |
| n405440        | 1.4  | 1.0 | 1.9  | 1.3 | 3.58E-02 | 2.3  | 1.6  | 1.39E-01 |   |   |
| n339763        | 2.3  | 1.0 | 3.1  | 1.3 | 8.20E-03 | 3.8  | 1.6  | 3.26E-02 |   |   |
| n410166        | 2.3  | 1.0 | 3.0  | 1.3 | 8.83E-03 | 2.8  | 1.2  | 5.14E-01 |   |   |
| n326361        | 5.7  | 1.0 | 7.5  | 1.3 | 6.48E-03 | 7.8  | 1.4  | 3.66E-01 |   |   |
| n335564        | 6.4  | 1.0 | 8.4  | 1.3 | 1.56E-02 | 8.4  | 1.3  | 9.56E-01 |   |   |
| n340509        | 1.5  | 1.0 | 2.0  | 1.3 | 4.37E-02 | 1.7  | 1.1  | 1.26E-01 |   |   |
| n345231        | 1.5  | 1.0 | 1.9  | 1.3 | 3.27E-02 | 2.1  | 1.4  | 6.07E-01 |   |   |
| n340374        | 1.9  | 1.0 | 2.5  | 1.3 | 3.98E-03 | 2.7  | 1.4  | 5.47E-02 |   |   |
| n333361        | 44.3 | 1.0 | 57.9 | 1.3 | 7.22E-04 | 63.0 | 1.4  | 2.66E-01 |   |   |
| n405638        | 0.9  | 1.0 | 1.2  | 1.3 | 2.89E-02 | 1.3  | 1.4  | 7.42E-01 |   |   |
| n410565        | 4.7  | 1.0 | 6.2  | 1.3 | 1.25E-02 | 5.9  | 1.2  | 5.60E-01 |   |   |
| n383211        | 0.9  | 1.0 | 1.2  | 1.3 | 4.27E-02 | 2.1  | 2.2  | 5.85E-02 |   |   |
| n339111        | 9.6  | 1.0 | 12.5 | 1.3 | 5.35E-03 | 16.7 | 1.7  | 9.97E-03 |   |   |
| n407745        | 9.1  | 1.0 | 11.8 | 1.3 | 3.64E-04 | 12.5 | 1.4  | 2.76E-01 |   |   |
| n337872        | 1.2  | 1.0 | 1.6  | 1.3 | 3.20E-02 | 1.7  | 1.4  | 3.32E-01 |   |   |
| n335592        | 14.5 | 1.0 | 18.8 | 1.3 | 6.09E-03 | 15.8 | 1.1  | 2.21E-01 |   |   |
| n410890        | 0.7  | 1.0 | 0.9  | 1.3 | 4.03E-02 | 1.2  | 1.6  | 2.49E-01 |   |   |
| n340531        | 8.9  | 1.0 | 11.5 | 1.3 | 3.47E-03 | 12.8 | 1.4  | 1.96E-01 |   |   |
| n342731        | 6.0  | 1.0 | 7.8  | 1.3 | 1.02E-04 | 8.2  | 1.4  | 3.87E-01 |   |   |
| n339180        | 3.3  | 1.0 | 4.3  | 1.3 | 3.00E-03 | 4.2  | 1.3  | 9.54E-01 |   |   |
| n406444        | 28.1 | 1.0 | 36.4 | 1.3 | 2.11E-03 | 32.8 | 1.2  | 2.60E-01 |   |   |
| n339927        | 1.4  | 1.0 | 1.8  | 1.3 | 1.46E-02 | 2.4  | 1.7  | 6.71E-03 |   |   |
| n377988        | 0.9  | 1.0 | 1.2  | 1.3 | 4.45E-02 | 1.1  | 1.3  | 8.01E-01 |   |   |
| n408019        | 2.1  | 1.0 | 2.7  | 1.3 | 1.08E-02 | 2.1  | -1.0 | 3.41E-02 |   |   |
| n342111        | 7.7  | 1.0 | 9.9  | 1.3 | 2.17E-02 | 10.6 | 1.4  | 5.88E-01 |   |   |
| n378971        | 3.6  | 1.0 | 4.7  | 1.3 | 3.06E-02 | 4.4  | 1.2  | 4.43E-01 |   |   |
| n338715        | 2.0  | 1.0 | 2.6  | 1.3 | 3.30E-03 | 2.0  | -1.0 | 6.14E-03 |   |   |
| n411752        | 3.8  | 1.0 | 4.9  | 1.3 | 2.96E-03 | 6.1  | 1.6  | 5.28E-03 |   |   |
| n344975        | 1.2  | 1.0 | 1.6  | 1.3 | 2.38E-02 | 1.9  | 1.5  | 1.88E-01 |   |   |
| n335614        | 44.9 | 1.0 | 57.7 | 1.3 | 4.60E-02 | 62.9 | 1.4  | 4.96E-01 |   |   |
| n408302        | 5.0  | 1.0 | 6.5  | 1.3 | 2.20E-02 | 5.1  | 1.0  | 2.68E-03 |   |   |
| n384215        | 1.9  | 1.0 | 2.4  | 1.3 | 1.90E-02 | 2.3  | 1.2  | 5.95E-01 |   |   |
| n342697        | 28.2 | 1.0 | 36.3 | 1.3 | 1.70E-02 | 37.6 | 1.3  | 6.79E-01 |   |   |
| TCONS_00002935 | 2.3  | 1.0 | 3.0  | 1.3 | 1.94E-02 | 3.7  | 1.6  | 1.11E-01 |   |   |
| n339967        | 2.5  | 1.0 | 3.2  | 1.3 | 1.84E-02 | 3.3  | 1.3  | 8.44E-01 |   |   |
| n340921        | 3.1  | 1.0 | 3.9  | 1.3 | 1.01E-02 | 4.4  | 1.4  | 1.98E-01 |   |   |
| n338691        | 3.6  | 1.0 | 4.6  | 1.3 | 5.30E-03 | 3.8  | 1.0  | 1.82E-02 |   |   |
| n342244        | 5.0  | 1.0 | 6.4  | 1.3 | 5.52E-04 | 6.2  | 1.2  | 5.88E-01 |   |   |
| n341644        | 4.9  | 1.0 | 6.3  | 1.3 | 1.59E-02 | 6.8  | 1.4  | 5.08E-01 |   |   |
| n410143        | 2.9  | 1.0 | 3.8  | 1.3 | 1.79E-03 | 4.1  | 1.4  | 3.75E-01 |   |   |
| n342504        | 2.5  | 1.0 | 3.2  | 1.3 | 2.35E-02 | 4.2  | 1.7  | 8.55E-02 |   |   |
| n339355        | 11.4 | 1.0 | 14.6 | 1.3 | 3.69E-02 | 16.5 | 1.4  | 2.74E-01 |   |   |
| n407015        | 69.0 | 1.0 | 88.2 | 1.3 | 1.31E-02 | 85.7 | 1.2  | 4.45E-01 |   |   |
| n342788        | 10.0 | 1.0 | 12.8 | 1.3 | 9.02E-03 | 13.1 | 1.3  | 7.99E-01 |   |   |
| n340794        | 3.2  | 1.0 | 4.0  | 1.3 | 4.04E-02 | 4.3  | 1.4  | 5.88E-01 |   |   |
| n340647        | 1.7  | 1.0 | 2.2  | 1.3 | 3.92E-02 | 2.5  | 1.4  | 4.37E-01 |   |   |
| n341240        | 2.8  | 1.0 | 3.5  | 1.3 | 3.70E-03 | 4.6  | 1.7  | 2.31E-02 |   |   |
| n409199        | 3.4  | 1.0 | 4.3  | 1.3 | 2.06E-04 | 4.4  | 1.3  | 6.89E-01 |   |   |
| n410616        | 4.0  | 1.0 | 5.1  | 1.3 | 2.71E-02 | 4.9  | 1.2  | 7.01E-01 |   |   |
| n406342        | 3.2  | 1.0 | 4.1  | 1.3 | 1.30E-03 | 4.5  | 1.4  | 2.94E-01 |   |   |
| n341171        | 1.4  | 1.0 | 1.7  | 1.3 | 1.60E-02 | 1.8  | 1.3  | 9.02E-01 |   |   |
| n410151        | 3.1  | 1.0 | 3.9  | 1.3 | 3.63E-02 | 3.7  | 1.2  | 6.81E-01 |   |   |
| n408276        | 2.4  | 1.0 | 3.0  | 1.3 | 2.75E-02 | 2.8  | 1.2  | 5.59E-01 |   |   |
| n339624        | 2.0  | 1.0 | 2.5  | 1.3 | 3.63E-02 | 2.9  | 1.4  | 2.12E-01 |   |   |
| n383770        | 2.4  | 1.0 | 3.0  | 1.3 | 1.60E-02 | 3.3  | 1.4  | 4.68E-01 |   |   |
| n410463        | 5.8  | 1.0 | 7.3  | 1.3 | 3.81E-03 | 7.4  | 1.3  | 8.87E-01 |   |   |
| n407780        | 6.2  | 1.0 | 7.8  | 1.3 | 2.89E-02 | 6.9  | 1.1  | 3.08E-01 |   |   |
| n409339        | 4.4  | 1.0 | 5.5  | 1.3 | 2.01E-02 | 5.9  | 1.4  | 3.17E-01 |   |   |
| n343020        | 1.6  | 1.0 | 2.0  | 1.3 | 2.13E-02 | 2.3  | 1.5  | 3.82E-01 |   |   |
| n339276        | 3.2  | 1.0 | 4.0  | 1.3 | 1.03E-02 | 6.3  | 2.0  | 2.86E-03 |   |   |
| n409649        | 3.5  | 1.0 | 4.4  | 1.3 | 6.55E-03 | 5.0  | 1.4  | 8.37E-02 |   |   |
| n411750        | 6.6  | 1.0 | 8.3  | 1.3 | 5.15E-03 | 7.7  | 1.2  | 3.48E-01 |   |   |
| n342865        | 2.4  | 1.0 | 3.0  | 1.3 | 4.14E-02 | 3.1  | 1.3  | 8.94E-01 |   |   |
| n410677        | 16.6 | 1.0 | 20.8 | 1.3 | 2.30E-02 | 18.0 | 1.1  | 1.04E-01 |   |   |
| n346127        | 4.9  | 1.0 | 6.1  | 1.3 | 3.01E-02 | 5.7  | 1.2  | 3.98E-01 |   |   |
| n378721        | 2.0  | 1.0 | 2.5  | 1.3 | 2.58E-02 | 2.1  | 1.1  | 1.03E-01 |   |   |
| n409180        | 2.5  | 1.0 | 3.2  | 1.3 | 1.14E-02 | 3.5  | 1.4  | 2.31E-01 |   |   |
| n407781        | 1.6  | 1.0 | 2.0  | 1.3 | 2.63E-02 | 2.2  | 1.4  | 3.11E-01 |   |   |
| n409269        | 2.5  | 1.0 | 3.2  | 1.3 | 1.30E-03 | 3.2  | 1.3  | 7.65E-01 |   |   |
| n408128        | 2.6  | 1.0 | 3.3  | 1.3 | 8.95E-03 | 3.9  | 1.5  | 1.26E-01 |   |   |
| n342335        | 3.4  | 1.0 | 4.3  | 1.3 | 2.72E-02 | 4.6  | 1.3  | 5.14E-01 |   |   |
| n386362        | 2.4  | 1.0 | 3.0  | 1.2 | 3.11E-02 | 3.1  | 1.3  | 6.58E-01 |   |   |
| n383727        | 2.1  | 1.0 | 2.6  | 1.2 | 4.53E-02 | 2.9  | 1.4  | 8.65E-02 |   |   |
| n411697        | 3.5  | 1.0 | 4.4  | 1.2 | 7.47E-03 | 4.1  | 1.2  | 4.71E-01 |   |   |
| n409315        | 7.0  | 1.0 | 8.7  | 1.2 | 4.23E-02 | 6.4  | -1.1 | 3.45E-02 | √ | √ |
| n410512        | 1.6  | 1.0 | 2.0  | 1.2 | 2.43E-02 | 1.8  | 1.1  | 6.20E-02 |   |   |
| n342553        | 2.2  | 1.0 | 2.8  | 1.2 | 2.72E-02 | 3.9  | 1.8  | 3.68E-03 |   |   |
| n377761        | 3.5  | 1.0 | 4.4  | 1.2 | 7.70E-03 | 4.1  | 1.2  | 2.69E-01 |   |   |
| n338368        | 2.9  | 1.0 | 3.6  | 1.2 | 3.83E-02 | 4.4  | 1.5  | 3.69E-02 |   |   |
| n338841        | 69.9 | 1.0 | 86.4 | 1.2 | 2.17E-02 | 83.4 | 1.2  | 7.39E-01 |   |   |
| n410673        | 14.8 | 1.0 | 18.2 | 1.2 | 6.75E-04 | 16.2 | 1.1  | 2.03E-02 |   |   |
| n407569        | 1.5  | 1.0 | 1.8  | 1.2 | 7.87E-03 | 1.7  | 1.1  | 4.15E-01 |   |   |

|                |       |     |       |      |          |       |      |          |   |   |
|----------------|-------|-----|-------|------|----------|-------|------|----------|---|---|
| n410441        | 4.7   | 1.0 | 5.7   | 1.2  | 2.31E-02 | 5.0   | 1.1  | 1.45E-02 |   |   |
| n409268        | 107.3 | 1.0 | 131.8 | 1.2  | 5.89E-03 | 112.9 | 1.1  | 8.79E-02 |   |   |
| n342837        | 22.1  | 1.0 | 27.1  | 1.2  | 4.00E-05 | 25.1  | 1.1  | 4.29E-02 |   |   |
| n407775        | 1.8   | 1.0 | 2.2   | 1.2  | 2.95E-02 | 2.7   | 1.5  | 2.37E-01 |   |   |
| n382329        | 3.4   | 1.0 | 4.2   | 1.2  | 2.51E-02 | 4.3   | 1.3  | 7.12E-01 |   |   |
| n407887        | 44.2  | 1.0 | 54.1  | 1.2  | 4.32E-02 | 50.2  | 1.1  | 3.13E-01 |   |   |
| n410556        | 5.0   | 1.0 | 6.1   | 1.2  | 4.71E-02 | 6.2   | 1.2  | 8.04E-01 |   |   |
| n410504        | 14.6  | 1.0 | 17.8  | 1.2  | 1.13E-02 | 18.1  | 1.2  | 8.60E-01 |   |   |
| n406191        | 1.7   | 1.0 | 2.1   | 1.2  | 4.55E-04 | 1.8   | 1.0  | 3.43E-02 |   |   |
| n409625        | 13.7  | 1.0 | 16.7  | 1.2  | 2.64E-02 | 24.2  | 1.8  | 2.20E-02 |   |   |
| n411654        | 3.2   | 1.0 | 3.9   | 1.2  | 1.30E-02 | 3.9   | 1.2  | 9.33E-01 |   |   |
| n338963        | 12.0  | 1.0 | 14.6  | 1.2  | 9.81E-03 | 12.7  | 1.1  | 2.08E-01 |   |   |
| n409656        | 5.0   | 1.0 | 6.1   | 1.2  | 1.10E-02 | 5.9   | 1.2  | 5.22E-01 |   |   |
| n342719        | 1.7   | 1.0 | 2.1   | 1.2  | 4.85E-02 | 2.3   | 1.3  | 4.63E-01 |   |   |
| n341043        | 12.0  | 1.0 | 14.6  | 1.2  | 2.39E-02 | 12.9  | 1.1  | 1.45E-01 |   |   |
| n406459        | 16.2  | 1.0 | 19.6  | 1.2  | 8.99E-03 | 19.5  | 1.2  | 9.48E-01 |   |   |
| n335646        | 6.3   | 1.0 | 7.6   | 1.2  | 2.64E-02 | 7.5   | 1.2  | 9.25E-01 |   |   |
| n790           | 10.2  | 1.0 | 12.3  | 1.2  | 3.96E-02 | 11.3  | 1.1  | 3.33E-01 |   |   |
| n410787        | 7.4   | 1.0 | 8.9   | 1.2  | 6.74E-03 | 9.0   | 1.2  | 8.88E-01 |   |   |
| n339737        | 15.4  | 1.0 | 18.6  | 1.2  | 2.51E-02 | 24.0  | 1.6  | 1.04E-02 |   |   |
| n408280        | 13.6  | 1.0 | 16.4  | 1.2  | 3.20E-02 | 18.2  | 1.3  | 3.96E-01 |   |   |
| n408020        | 1.6   | 1.0 | 1.9   | 1.2  | 5.78E-03 | 1.8   | 1.1  | 6.85E-01 |   |   |
| n341836        | 2.8   | 1.0 | 3.4   | 1.2  | 3.04E-02 | 3.5   | 1.2  | 9.02E-01 |   |   |
| n335709        | 15.2  | 1.0 | 18.2  | 1.2  | 1.04E-02 | 17.8  | 1.2  | 7.41E-01 |   |   |
| n407055        | 6.3   | 1.0 | 7.6   | 1.2  | 1.27E-02 | 9.4   | 1.5  | 5.30E-02 |   |   |
| n406409        | 19.1  | 1.0 | 15.3  | -1.3 | 6.04E-03 | 17.6  | -1.1 | 4.79E-03 |   |   |
| n409173        | 29.0  | 1.0 | 23.2  | -1.3 | 3.14E-02 | 19.4  | -1.5 | 1.68E-01 |   |   |
| n409359        | 4.3   | 1.0 | 3.5   | -1.3 | 1.25E-02 | 3.9   | -1.1 | 1.25E-01 |   |   |
| n407057        | 28.0  | 1.0 | 22.3  | -1.3 | 8.93E-04 | 23.5  | -1.2 | 2.66E-01 |   |   |
| n407934        | 85.1  | 1.0 | 67.8  | -1.3 | 1.90E-02 | 77.1  | -1.1 | 9.28E-02 |   |   |
| n342407        | 286.8 | 1.0 | 228.1 | -1.3 | 1.03E-04 | 255.1 | -1.1 | 1.57E-01 |   |   |
| n344791        | 2.4   | 1.0 | 1.9   | -1.3 | 4.08E-02 | 1.4   | -1.8 | 4.09E-02 |   |   |
| n342114        | 685.7 | 1.0 | 541.2 | -1.3 | 4.16E-03 | 538.6 | -1.3 | 9.70E-01 |   |   |
| n407076        | 25.3  | 1.0 | 19.9  | -1.3 | 2.40E-02 | 19.6  | -1.3 | 9.03E-01 |   |   |
| n340852        | 6.5   | 1.0 | 5.1   | -1.3 | 4.04E-02 | 7.1   | 1.1  | 5.83E-02 |   |   |
| n410568        | 5.8   | 1.0 | 4.6   | -1.3 | 2.28E-02 | 5.9   | 1.0  | 1.09E-02 | ▼ | ▼ |
| n333904        | 11.3  | 1.0 | 8.9   | -1.3 | 2.39E-03 | 8.8   | -1.3 | 8.63E-01 |   |   |
| n407108        | 25.1  | 1.0 | 19.6  | -1.3 | 4.38E-03 | 21.2  | -1.2 | 6.41E-02 |   |   |
| n405885        | 28.0  | 1.0 | 21.7  | -1.3 | 3.27E-04 | 23.0  | -1.2 | 3.39E-01 |   |   |
| n408144        | 11.9  | 1.0 | 9.2   | -1.3 | 4.68E-04 | 9.0   | -1.3 | 7.03E-01 |   |   |
| n341954        | 1.6   | 1.0 | 1.3   | -1.3 | 3.17E-02 | 3.4   | 2.1  | 1.20E-02 |   |   |
| n341460        | 1.0   | 1.0 | 0.8   | -1.3 | 3.14E-02 | 1.1   | 1.1  | 8.52E-03 | ▼ | ▼ |
| n409175        | 5.9   | 1.0 | 4.5   | -1.3 | 7.62E-03 | 4.9   | -1.2 | 3.73E-01 |   |   |
| n407040        | 9.0   | 1.0 | 6.9   | -1.3 | 1.60E-03 | 7.4   | -1.2 | 2.56E-01 |   |   |
| n407953        | 2.3   | 1.0 | 1.8   | -1.3 | 3.29E-02 | 2.2   | -1.1 | 1.70E-01 |   |   |
| n335578        | 14.2  | 1.0 | 10.9  | -1.3 | 5.36E-03 | 11.4  | -1.2 | 3.01E-01 |   |   |
| n340236        | 32.8  | 1.0 | 24.9  | -1.3 | 3.80E-02 | 23.6  | -1.4 | 6.94E-01 |   |   |
| n411638        | 24.8  | 1.0 | 18.8  | -1.3 | 1.22E-03 | 23.5  | -1.1 | 7.31E-02 |   |   |
| n408060        | 6.8   | 1.0 | 5.1   | -1.3 | 5.47E-03 | 5.8   | -1.2 | 1.10E-01 |   |   |
| n408043        | 39.2  | 1.0 | 29.6  | -1.3 | 1.67E-03 | 29.8  | -1.3 | 8.73E-01 |   |   |
| n409282        | 6.5   | 1.0 | 4.9   | -1.3 | 4.51E-02 | 5.7   | -1.1 | 5.01E-02 |   |   |
| n335694        | 2.6   | 1.0 | 2.0   | -1.3 | 2.66E-02 | 3.1   | 1.2  | 1.52E-01 |   |   |
| TCONS_00017504 | 0.6   | 1.0 | 0.5   | -1.3 | 3.90E-02 | 0.7   | 1.2  | 1.19E-01 |   |   |
| n406526        | 13.0  | 1.0 | 9.7   | -1.3 | 8.76E-03 | 10.7  | -1.2 | 2.73E-01 |   |   |
| n338381        | 1.3   | 1.0 | 1.0   | -1.3 | 4.20E-02 | 1.0   | -1.4 | 9.73E-01 |   |   |
| n409288        | 2.7   | 1.0 | 2.0   | -1.4 | 1.90E-02 | 3.2   | 1.2  | 1.69E-01 |   |   |
| n343018        | 29.2  | 1.0 | 21.5  | -1.4 | 2.56E-03 | 30.0  | 1.0  | 2.65E-03 | ▼ | ▼ |
| n339618        | 15.6  | 1.0 | 11.5  | -1.4 | 1.36E-02 | 17.0  | 1.1  | 6.33E-03 | ▼ | ▼ |
| n380677        | 0.8   | 1.0 | 0.6   | -1.4 | 2.44E-02 | 0.5   | -1.4 | 7.91E-01 |   |   |
| n341044        | 1.2   | 1.0 | 0.9   | -1.4 | 3.25E-02 | 1.2   | -1.0 | 2.90E-01 |   |   |
| n341540        | 1.2   | 1.0 | 0.8   | -1.4 | 2.99E-02 | 0.8   | -1.4 | 9.51E-01 |   |   |
| n411603        | 173.3 | 1.0 | 125.1 | -1.4 | 2.64E-04 | 144.6 | -1.2 | 1.26E-01 |   |   |
| n378671        | 66.9  | 1.0 | 48.2  | -1.4 | 3.52E-02 | 54.3  | -1.2 | 4.42E-01 |   |   |
| n340733        | 12.8  | 1.0 | 9.1   | -1.4 | 5.63E-04 | 9.0   | -1.4 | 9.01E-01 |   |   |
| n339657        | 2.8   | 1.0 | 2.0   | -1.4 | 2.79E-02 | 1.7   | -1.7 | 2.88E-01 |   |   |
| n339261        | 1.8   | 1.0 | 1.3   | -1.4 | 9.54E-03 | 1.8   | -1.0 | 3.56E-03 | ▼ | ▼ |
| n338562        | 1.9   | 1.0 | 1.3   | -1.4 | 4.85E-03 | 1.3   | -1.4 | 7.96E-01 |   |   |
| n406583        | 4.8   | 1.0 | 3.4   | -1.4 | 2.37E-02 | 3.7   | -1.3 | 5.96E-01 |   |   |
| n385273        | 1.5   | 1.0 | 1.1   | -1.4 | 9.50E-03 | 1.6   | 1.1  | 4.35E-02 | ▼ | ▼ |
| n342760        | 5.1   | 1.0 | 3.5   | -1.4 | 2.56E-03 | 5.1   | 1.0  | 2.15E-02 | ▼ | ▼ |
| n407211        | 1.4   | 1.0 | 1.0   | -1.4 | 1.60E-02 | 1.7   | 1.2  | 3.69E-03 |   |   |
| n409341        | 11.2  | 1.0 | 7.8   | -1.4 | 3.23E-04 | 9.4   | -1.2 | 1.63E-01 |   |   |
| n381031        | 7.0   | 1.0 | 4.9   | -1.4 | 1.60E-02 | 5.3   | -1.3 | 4.25E-01 |   |   |
| n407979        | 25.0  | 1.0 | 17.3  | -1.4 | 1.43E-02 | 14.6  | -1.7 | 1.48E-01 |   |   |
| n333334        | 10.4  | 1.0 | 7.1   | -1.5 | 2.90E-03 | 11.5  | 1.1  | 1.66E-03 |   |   |
| n335652        | 22.2  | 1.0 | 15.2  | -1.5 | 3.53E-05 | 12.3  | -1.8 | 2.51E-02 |   |   |
| n407850        | 5.9   | 1.0 | 4.0   | -1.5 | 1.51E-02 | 13.9  | 2.4  | 2.46E-02 |   |   |
| n405951        | 1.1   | 1.0 | 0.7   | -1.5 | 3.95E-02 | 1.1   | -1.0 | 7.66E-02 |   |   |
| n337710        | 9.8   | 1.0 | 6.6   | -1.5 | 2.60E-02 | 7.2   | -1.4 | 3.42E-01 |   |   |
| n342706        | 331.2 | 1.0 | 222.9 | -1.5 | 2.70E-03 | 245.2 | -1.4 | 5.84E-01 |   |   |
| n340836        | 3.7   | 1.0 | 2.5   | -1.5 | 8.66E-04 | 2.8   | -1.3 | 4.55E-01 |   |   |
| n409105        | 1.6   | 1.0 | 1.1   | -1.5 | 1.58E-03 | 1.6   | -1.0 | 2.36E-03 | ▼ | ▼ |
| n411692        | 2.9   | 1.0 | 1.9   | -1.5 | 2.48E-03 | 2.5   | -1.1 | 6.05E-02 |   |   |

|                |       |     |       |      |          |       |      |          |   |   |
|----------------|-------|-----|-------|------|----------|-------|------|----------|---|---|
| n342206        | 14.1  | 1.0 | 9.4   | -1.5 | 4.45E-03 | 11.4  | -1.2 | 6.35E-02 |   |   |
| n406466        | 0.8   | 1.0 | 0.5   | -1.5 | 2.78E-02 | 1.0   | 1.3  | 6.74E-03 |   |   |
| n380484        | 3.1   | 1.0 | 2.0   | -1.5 | 7.80E-03 | 3.6   | 1.2  | 6.70E-03 |   |   |
| n342843        | 3.8   | 1.0 | 2.5   | -1.5 | 2.96E-02 | 5.7   | 1.5  | 4.10E-03 |   |   |
| n381030        | 10.6  | 1.0 | 6.9   | -1.5 | 5.37E-04 | 8.6   | -1.2 | 5.32E-02 |   |   |
| n342205        | 7.1   | 1.0 | 4.6   | -1.5 | 4.33E-02 | 5.5   | -1.3 | 2.78E-03 |   |   |
| n341759        | 3.9   | 1.0 | 2.5   | -1.5 | 5.83E-03 | 4.5   | 1.2  | 2.17E-02 |   |   |
| n342839        | 3.3   | 1.0 | 2.1   | -1.6 | 2.15E-02 | 4.7   | 1.4  | 2.28E-02 |   |   |
| n338685        | 0.6   | 1.0 | 0.4   | -1.6 | 2.95E-02 | 0.6   | 1.1  | 1.01E-02 |   |   |
| n378134        | 5.7   | 1.0 | 3.6   | -1.6 | 1.57E-02 | 6.1   | 1.1  | 5.25E-02 |   |   |
| n409060        | 17.0  | 1.0 | 10.6  | -1.6 | 2.13E-03 | 12.2  | -1.4 | 3.97E-01 |   |   |
| n344454        | 3.1   | 1.0 | 1.9   | -1.6 | 1.55E-02 | 2.4   | -1.3 | 1.84E-01 |   |   |
| n410608        | 5.6   | 1.0 | 3.5   | -1.6 | 3.69E-02 | 3.7   | -1.5 | 8.93E-01 |   |   |
| n385535        | 11.0  | 1.0 | 6.7   | -1.6 | 3.18E-03 | 7.4   | -1.5 | 6.19E-01 |   |   |
| n338140        | 2.4   | 1.0 | 1.5   | -1.6 | 4.66E-03 | 3.0   | 1.3  | 1.90E-02 |   |   |
| n340534        | 0.9   | 1.0 | 0.5   | -1.6 | 1.04E-02 | 0.9   | -1.0 | 3.58E-02 | √ | √ |
| n343066        | 219.2 | 1.0 | 132.7 | -1.7 | 4.51E-02 | 127.8 | -1.7 | 7.64E-01 |   |   |
| n340843        | 1.0   | 1.0 | 0.6   | -1.7 | 3.73E-03 | 0.9   | -1.1 | 3.36E-02 | √ | √ |
| n338279        | 17.3  | 1.0 | 10.4  | -1.7 | 1.53E-04 | 9.3   | -1.9 | 2.01E-01 |   |   |
| n333986        | 315.1 | 1.0 | 189.8 | -1.7 | 4.67E-02 | 187.0 | -1.7 | 8.75E-01 |   |   |
| n339152        | 16.0  | 1.0 | 9.4   | -1.7 | 3.29E-03 | 8.9   | -1.8 | 8.04E-01 |   |   |
| n339574        | 2.1   | 1.0 | 1.2   | -1.7 | 1.99E-02 | 1.1   | -1.9 | 7.31E-01 |   |   |
| n338787        | 9.7   | 1.0 | 5.6   | -1.7 | 5.70E-04 | 9.3   | -1.0 | 8.17E-02 |   |   |
| TCONS_00012453 | 1.1   | 1.0 | 0.6   | -1.7 | 3.00E-02 | 0.7   | -1.6 | 8.65E-01 |   |   |
| n342544        | 0.5   | 1.0 | 0.3   | -1.8 | 4.89E-02 | 0.5   | -1.1 | 3.11E-02 | √ | √ |
| n346121        | 3.2   | 1.0 | 1.8   | -1.8 | 9.49E-05 | 2.1   | -1.5 | 8.63E-02 |   |   |
| n346329        | 1.3   | 1.0 | 0.7   | -1.8 | 7.80E-03 | 0.7   | -1.9 | 7.87E-01 |   |   |
| n335671        | 40.3  | 1.0 | 22.0  | -1.8 | 1.59E-03 | 22.9  | -1.8 | 7.48E-01 |   |   |
| TCONS_00015564 | 2.1   | 1.0 | 1.1   | -1.9 | 3.02E-02 | 1.5   | -1.4 | 4.93E-02 |   | √ |
| TCONS_00029435 | 1.2   | 1.0 | 0.6   | -1.9 | 8.49E-04 | 0.5   | -2.3 | 4.44E-01 |   |   |
| n410722        | 2.3   | 1.0 | 1.2   | -1.9 | 1.98E-02 | 1.5   | -1.5 | 3.94E-02 |   | √ |
| n340147        | 1.0   | 1.0 | 0.5   | -1.9 | 7.01E-03 | 0.5   | -2.1 | 7.28E-01 |   |   |
| n408908        | 43.5  | 1.0 | 22.8  | -1.9 | 3.04E-03 | 36.5  | -1.2 | 2.32E-02 |   | √ |
| n341343        | 8.5   | 1.0 | 4.4   | -1.9 | 1.45E-03 | 6.0   | -1.4 | 6.34E-02 |   |   |
| n406139        | 8.8   | 1.0 | 4.6   | -1.9 | 2.74E-04 | 10.5  | 1.2  | 3.15E-02 |   |   |
| n337293        | 7.1   | 1.0 | 3.7   | -1.9 | 1.46E-02 | 6.1   | -1.2 | 4.77E-02 |   | √ |
| n338544        | 0.9   | 1.0 | 0.5   | -2.0 | 2.95E-02 | 0.8   | -1.2 | 7.63E-02 |   |   |
| n3894          | 1.9   | 1.0 | 1.0   | -2.0 | 4.08E-02 | 1.2   | -1.6 | 6.52E-01 |   |   |
| n338142        | 5.8   | 1.0 | 3.0   | -2.0 | 1.11E-03 | 4.2   | -1.4 | 3.87E-02 |   | √ |
| n340299        | 15.8  | 1.0 | 8.0   | -2.0 | 2.58E-02 | 6.0   | -2.6 | 4.28E-02 |   |   |
| n409244        | 38.2  | 1.0 | 19.1  | -2.0 | 2.75E-04 | 25.5  | -1.5 | 7.83E-02 |   |   |
| n410706        | 29.2  | 1.0 | 14.1  | -2.1 | 4.58E-02 | 38.3  | 1.3  | 1.36E-01 |   |   |
| n408252        | 1.0   | 1.0 | 0.5   | -2.1 | 1.21E-03 | 0.4   | -2.3 | 7.04E-01 |   |   |
| n340146        | 3.9   | 1.0 | 1.8   | -2.2 | 7.66E-03 | 1.7   | -2.3 | 8.85E-01 |   |   |
| n342938        | 1.2   | 1.0 | 0.6   | -2.2 | 2.16E-02 | 2.5   | 2.1  | 4.15E-02 |   |   |
| n385559        | 4.3   | 1.0 | 2.0   | -2.2 | 1.11E-03 | 2.9   | -1.5 | 6.71E-02 |   |   |
| n336898        | 3.2   | 1.0 | 1.4   | -2.2 | 1.40E-02 | 3.8   | 1.2  | 3.94E-01 |   |   |
| n385557        | 0.7   | 1.0 | 0.3   | -2.2 | 3.87E-02 | 0.5   | -1.3 | 1.34E-01 |   |   |
| n379445        | 2.1   | 1.0 | 0.9   | -2.3 | 4.13E-02 | 1.0   | -2.1 | 8.44E-01 |   |   |
| TCONS_00016476 | 1.3   | 1.0 | 0.6   | -2.3 | 4.46E-03 | 1.2   | -1.1 | 9.63E-02 |   |   |
| TCONS_00016948 | 4.2   | 1.0 | 1.9   | -2.3 | 1.19E-02 | 2.6   | -1.6 | 1.42E-01 |   |   |
| TCONS_00023459 | 0.9   | 1.0 | 0.4   | -2.5 | 2.33E-02 | 0.6   | -1.6 | 9.65E-02 |   |   |
| n334005        | 1.2   | 1.0 | 0.4   | -2.7 | 6.47E-03 | 0.5   | -2.2 | 5.84E-01 |   |   |
| n380635        | 0.6   | 1.0 | 0.2   | -2.9 | 2.05E-03 | 0.7   | 1.2  | 1.81E-03 |   |   |
| n408236        | 0.8   | 1.0 | 0.3   | -3.1 | 4.74E-02 | 0.6   | -1.3 | 3.09E-02 |   | √ |
| TCONS_00015553 | 0.9   | 1.0 | 0.3   | -3.2 | 4.09E-03 | 0.3   | -2.7 | 6.26E-01 |   |   |
| n337853        | 2.2   | 1.0 | 0.7   | -3.2 | 7.17E-03 | 2.0   | -1.1 | 6.64E-03 | √ | √ |
| n339157        | 2.6   | 1.0 | 0.8   | -3.2 | 7.30E-03 | 1.5   | -1.8 | 6.50E-02 |   |   |
| n339715        | 0.3   | 1.0 | 0.1   | -3.2 | 1.68E-02 | 0.5   | 1.6  | 3.26E-02 |   |   |
| n411751        | 2.6   | 1.0 | 0.8   | -3.3 | 5.50E-04 | 0.9   | -2.8 | 7.51E-01 |   |   |
| n407909        | 3.2   | 1.0 | 0.9   | -3.5 | 2.45E-02 | 0.7   | -4.8 | 2.97E-01 |   |   |
| TCONS_00025402 | 0.6   | 1.0 | 0.2   | -3.9 | 4.01E-02 | 0.2   | -3.0 | 7.37E-01 |   |   |
| TCONS_00008443 | 0.6   | 1.0 | 0.2   | -3.9 | 3.10E-03 | 0.6   | -1.1 | 7.30E-02 |   |   |
| n338599        | 0.7   | 1.0 | 0.2   | -4.5 | 3.70E-02 | 0.1   | -7.9 | 1.25E-01 |   |   |
| n384299        | 0.8   | 1.0 | 0.2   | -4.6 | 3.97E-04 | 0.5   | -1.7 | 2.23E-01 |   |   |
| n339156        | 1.0   | 1.0 | 0.2   | -4.6 | 4.78E-03 | 0.8   | -1.2 | 2.06E-03 |   | √ |
| n335657        | 3.9   | 1.0 | 0.8   | -5.1 | 1.84E-02 | 2.8   | -1.4 | 6.30E-02 |   |   |
| TCONS_00012631 | 0.6   | 1.0 | 0.1   | -5.1 | 4.86E-03 | 0.4   | -1.5 | 1.71E-02 |   | √ |
| n409074        | 0.9   | 1.0 | 0.1   | -6.8 | 1.72E-02 | 0.3   | -2.9 | 1.09E-01 |   |   |
| n332638        | 1.7   | 1.0 | 0.2   | -7.0 | 2.78E-02 | 0.8   | -2.2 | 1.75E-01 |   |   |
| TCONS_00024424 | 3.1   | 1.0 | 0.4   | -7.9 | 3.16E-02 | 0.5   | -6.1 | 1.07E-01 |   |   |
| n345956        | 0.5   | 1.0 | 0.1   | -8.6 | 4.03E-02 | 0.1   | -6.9 | 5.58E-01 |   |   |
| n407725        | 0.8   | 1.0 | 0.1   | -8.6 | 4.75E-02 | 0.6   | -1.3 | 2.42E-02 |   | √ |



**Supplemental Table S16. lncRNAs abnormally expressed with heart failure but normalized\* with LVAD support**

| lncRNA         | NF<br>(RPKM+0.1) | ICM pre-LVAD |          | ICM post-LVAD |                      |
|----------------|------------------|--------------|----------|---------------|----------------------|
|                |                  | Fold Change  | P Value  | Fold Change   | P Value <sup>†</sup> |
| n339730        | 0.1              | 9.0          | 1.59E-03 | -1.0          | 4.88E-03             |
| n408065        | 0.1              | 3.0          | 2.09E-02 | -1.0          | 3.39E-02             |
| KCONS_00000467 | 0.5              | 2.4          | 1.40E-04 | 1.0           | 3.48E-04             |
| n406465        | 0.4              | 2.1          | 1.73E-02 | -1.0          | 2.90E-02             |
| n340499        | 0.6              | 1.8          | 6.41E-03 | -1.0          | 1.92E-02             |
| n335515        | 1.0              | 1.7          | 1.32E-02 | -1.1          | 1.28E-02             |
| n406597        | 1.9              | 1.7          | 2.53E-02 | 1.1           | 4.49E-02             |
| n341120        | 0.6              | 1.6          | 1.42E-02 | 1.1           | 3.58E-02             |
| TCONS_00008328 | 1.3              | 1.6          | 3.04E-02 | 1.1           | 4.95E-02             |
| n346209        | 1.6              | 1.6          | 3.68E-02 | -1.1          | 1.03E-02             |
| TCONS_00027439 | 0.7              | 1.6          | 1.88E-02 | 1.0           | 2.67E-03             |
| n384258        | 1.7              | 1.5          | 6.45E-03 | 1.0           | 2.68E-02             |
| n410133        | 2.0              | 1.4          | 1.08E-02 | 1.1           | 7.55E-03             |
| n342880        | 3.0              | 1.4          | 8.82E-03 | 1.1           | 4.01E-03             |
| n340631        | 3.1              | 1.4          | 2.54E-03 | -1.0          | 3.44E-02             |
| n410077        | 3.1              | 1.4          | 3.72E-02 | -1.0          | 1.03E-02             |
| n339841        | 3.3              | 1.4          | 1.32E-02 | -1.1          | 1.99E-02             |
| n408079        | 2.6              | 1.4          | 5.70E-03 | 1.0           | 3.25E-02             |
| n406564        | 1.9              | 1.4          | 2.54E-02 | 1.0           | 4.38E-02             |
| n340297        | 140.6            | 1.4          | 4.62E-02 | -1.0          | 3.95E-02             |
| n411041        | 1.0              | 1.4          | 3.24E-03 | -1.0          | 1.67E-02             |
| n382502        | 8.6              | 1.3          | 1.50E-02 | -1.1          | 9.10E-03             |
| n409268        | 107.3            | 1.3          | 1.28E-02 | -1.1          | 5.03E-03             |
| n383233        | 4.8              | -1.3         | 4.19E-02 | 1.1           | 5.16E-03             |
| n407211        | 1.4              | -1.4         | 3.22E-02 | 1.0           | 2.48E-02             |
| n339156        | 1.0              | -4.1         | 7.15E-03 | -1.1          | 1.71E-02             |

  

| lncRNA         | NF<br>(PMMR+0.1) | NICM pre-LVAD |          | NICM post-LVAD |                      |
|----------------|------------------|---------------|----------|----------------|----------------------|
|                |                  | Fold Change   | P Value  | Fold Change    | P Value <sup>†</sup> |
| n340740        | 1.9              | 2.0           | 2.49E-02 | -1.1           | 1.99E-02             |
| n340512        | 0.6              | 1.9           | 5.19E-03 | 1.0            | 2.03E-02             |
| n341189        | 2.1              | 1.8           | 1.17E-02 | 1.1            | 1.97E-02             |
| TCONS_00009272 | 0.9              | 1.8           | 5.79E-03 | -1.0           | 3.89E-04             |
| n340062        | 2.0              | 1.8           | 2.31E-02 | 1.0            | 4.67E-02             |
| n341425        | 0.6              | 1.7           | 1.10E-02 | -1.0           | 3.70E-02             |
| n333054        | 3.2              | 1.7           | 2.90E-02 | -1.0           | 2.05E-03             |
| n384394        | 0.8              | 1.6           | 2.25E-02 | -1.1           | 3.25E-02             |
| n386063        | 2.2              | 1.6           | 7.04E-05 | 1.0            | 4.03E-03             |
| n411677        | 0.7              | 1.5           | 2.79E-02 | 1.1            | 2.95E-02             |
| n341697        | 0.7              | 1.5           | 7.12E-03 | 1.1            | 3.03E-02             |
| n336952        | 0.8              | 1.5           | 1.57E-02 | -1.0           | 3.27E-02             |
| TCONS_00008328 | 1.3              | 1.5           | 1.85E-02 | 1.0            | 2.51E-02             |

|         |      |      |          |      |          |
|---------|------|------|----------|------|----------|
| n408198 | 3.3  | 1.5  | 2.12E-03 | 1.1  | 3.20E-02 |
| n408895 | 1.1  | 1.4  | 4.50E-03 | -1.0 | 1.13E-02 |
| n335587 | 13.1 | 1.4  | 4.12E-02 | -1.0 | 1.01E-02 |
| n339370 | 0.6  | 1.3  | 9.36E-03 | -1.0 | 3.63E-02 |
| n409315 | 7.0  | 1.2  | 4.23E-02 | -1.1 | 3.45E-02 |
| n410568 | 5.8  | -1.3 | 2.28E-02 | 1.0  | 1.09E-02 |
| n341460 | 1.0  | -1.3 | 3.14E-02 | 1.1  | 8.52E-03 |
| n343018 | 29.2 | -1.4 | 2.56E-03 | 1.0  | 2.65E-03 |
| n339618 | 15.6 | -1.4 | 1.36E-02 | 1.1  | 6.33E-03 |
| n339261 | 1.8  | -1.4 | 9.54E-03 | -1.0 | 3.56E-03 |
| n385273 | 1.5  | -1.4 | 9.50E-03 | 1.1  | 4.35E-02 |
| n342760 | 5.1  | -1.4 | 2.56E-03 | 1.0  | 2.15E-02 |
| n409105 | 1.6  | -1.5 | 1.58E-03 | -1.0 | 2.36E-03 |
| n340534 | 0.9  | -1.6 | 1.04E-02 | -1.0 | 3.58E-02 |
| n340843 | 1.0  | -1.7 | 3.73E-03 | -1.1 | 3.36E-02 |
| n342544 | 0.5  | -1.8 | 4.89E-02 | -1.1 | 3.11E-02 |
| n337853 | 2.2  | -3.2 | 7.17E-03 | -1.1 | 6.64E-03 |

\*Abnormal expression: > 1.2 fold change comparing to NF mean; normalization: normalized expression level to < 1.1 fold different from NF mean.

†Paired sample Wilcoxon signed rank test between ICM/NICM samples before and after LVAD support.
